# Supplementary material for: Profiling of myristoylation in Toxoplasma gondii reveals an N-myristoylated protein important for host cell penetration
Source: eLife journal article supplement (doi:10.7554/elife.57861), 2020-07-03
Supplement: supp [file Figure 7 - source data 2.xlsx]

## Sheet: Sheet1
	Parasite	iKO MIC7							Parasite	iKO MIC7								Parasite	iKO MIC7								Parasite	iKO MIC7								Parasite	iKO MIC7 Wt Complemented									Parasite	iKO MIC7 Complemented Mutant
	Drug	NO RAPAMYCIN							Drug	NO RAPAMYCIN								Drug	Rapamycin								Drug	Rapamycin								Drug	Rapamycin									Drug	Rapamycin
	Cell line	HFF							Cell line	GFP-GPI								Cell line	HFF								Cell line	U20S GFP GPI								Cell line	U20S GFP GPI									Cell line	U20S GFP GPI
	Date	2020-02-27							Date	2020-02-27								Date	2020-02-26								Date	2020-02-26								Date	2020-03-04									Date	2020-03-04
	Folder	iKO_MIC7_SansRP_HFF_27022020							Folder	iKO_MIC7_SansRP_GFP-GPI_27022020								Folder	iKO_MIC7_RP_HFF_27022020								Folder	iKO_MIC7_RP_GFP-GPI_27022020								Folder	WtComp_RP_GFP-GPI_04032020									Folder	WtCompMutant_RP_GFP-GPI_04032020
	File	iKO_MIC7_SansRP_HFF_1							File name	iKO_MIC7_SansRP_pdisp_1								File name	iKO_MIC7_RP_HFF_1								File name	iKO_MIC7_RP_GFP-GPI_1								File name	WtComp_GFP-GPI_1									File name	WtCompMutant_GFP-GPI_1
	Invasion								Invasion									Invasion									Invasion									Invasion										Invasion
	Frame Start	Frame Finish	Time Start	Time Finish	Total time	Time in sec			Frame Start	Frame Finish	Time Start	Time Finish	Total time	Time in sec				Frame Start	Frame Finish	Time Start	Time Finish	Total time	Time in sec				Frame Start	Frame Finish	Time Start	Time Finish	Total time	Time in sec				Frame Start	Frame Finish	Time Start	Time Finish	Total time	Time in sec					Frame Start	Frame Finish	Time Start	Time Finish
1	0	74	00:00:00	01:21:00	01:21:00	81		1	93	128	01:46:00	02:27:00	00:41:00	41			1	176	212	03:07:00	03:45:00	00:38:00	38	Crop1		1	100	130	01:57:00	02:33:00	00:36:00	36			1	42	71	00:45:00	01:17:00	00:32:00	32				1	303	331	05:32:00	06:03:00
2	194	233	03:34:00	04:17:00	00:43:00	43		2	119	150	02:19:00	02:52:00	00:33:00	33																					2	302	332	05:31:00	06:04:00	00:33:00	33	Crop1			2	87	120	01:34:00	02:10:00
3	658	693	12:03:00	12:48:00	00:45:00	45		3	114	136	02:11:00	02:36:00	00:25:00	25																					3	192	230	03:30:00	04:11:00	00:41:00	41				3	379	398	06:55:00	07:16:00
4	671	718	12:23:00	13:15:00	00:52:00	52		4	15	44	00:16:00	00:49:00	00:33:00	33				Failed invasion									Failed invasion								4	514	558	09:24:00	10:12:00	00:48:00	48				4	226	255	04:07:00	04:39:00
5	800	834	14:46:00	15:24:00	00:38:00	38		5	127	167	02:26:00	03:12:00	00:46:00	46				Frame Start	Frame Finish	Time Start	Time Finish	Total time	Time in sec				Frame Start	Frame Finish	Time Start	Time Finish	Total time	Time in sec			5	212	257	03:52:00	04:41:00	00:49:00	49				5	255	296	04:39:00	05:24:00
6	540	573	09:58:00	10:34:00	00:36:00	36		6	97	136	01:51:00	02:36:00	00:45:00	45			1	88	144	01:33:00	02:33:00	01:00:00	60			1	9	65	00:09:00	01:16:00	01:07:00	67	Crop2		6	829	866	15:10:00	15:51:00	00:41:00	41				6	186	203	03:23:00	03:42:00
								7	224	259	04:18:00	04:59:00	00:41:00	41			2	89	113	01:34:00	01:59:00	00:25:00	25	Crop1		2	428	493	08:28:00	09:45:00	01:17:00	77													7	62	96	01:07:00	01:44:00
								8	128	155	02:27:00	02:58:00	00:31:00	31			3	106	201	01:52:00	03:34:00	01:42:00	102			3	383	482	07:34:00	09:32:00	01:58:00	118													8	799	827	14:37:00	15:08:00
								9	129	149	02:28:00	02:51:00	00:23:00	23			4	310	400	05:30:00	07:06:00	01:36:00	96			4	637	691	12:37:00	13:41:00	01:04:00	64													9	118	153	02:08:00	02:46:00
								10	223	257	04:17:00	04:56:00	00:39:00	39			5	290	350	05:09:00	06:13:00	01:04:00	64													Failed invasion
								11	390	424	07:31:00	08:10:00	00:39:00	39			6	848	865	15:06:00	15:24:00	00:18:00	18													Frame Start	Frame Finish	Time Start	Time Finish	Total time	Time in sec
								12	244	266	04:41:00	05:07:00	00:26:00	26			7	820	900	14:36:00	16:03:00	01:27:00	87				Folder	iKO_MIC7_RP_GFP-GPI_27022020							1	334	417	06:06:00	07:37:00	01:31:00	91	Crop3				Failed Invasion
								13	461	496	08:53:00	09:34:00	00:41:00	41													File name	iKO_MIC7_RP_GFP-GPI_4							2	602	653	11:01:00	11:57:00	00:56:00	56					Frame Start	Frame Finish	Time Start	Time Finish
								14	357	382	06:52:00	07:21:00	00:29:00	29													Invasion								3	504	641	09:13:00	11:44:00	02:31:00	151	Crop2			1	418	434	07:38:00	07:56:00
								15	256	297	04:55:00	05:43:00	00:48:00	48													Frame Start	Frame Finish	Time Start	Time Finish	Total time	Time in sec			4	241	394	04:24:00	07:12:00	02:48:00	168				2	211	259	03:51:00	04:43:00
								16	539	567	10:24:00	10:56:00	00:32:00	32				Folder	iKO_MIC7_RP_HFF_27022020							1	58	97	01:07:00	01:54:00	00:47:00	47													3	7	74	00:06:00	01:19:00
								17	737	768	14:13:00	14:49:00	00:36:00	36				File name	iKO_MIC7_RP_HFF_1							2	424	498	08:23:00	09:51:00	01:28:00	68
								18	575	604	11:05:00	11:39:00	00:34:00	34												3	546	600	10:48:00	11:52:00	01:04:00	64	Crop3			Folder	WtComp_RP_GFP-GPI_04032020
																		Failed invasion																		File name	WtComp_GFP-GPI_2
																		Frame Start	Frame Finish	Time Start	Time Finish	Total time	Time in sec				Failed invasion									Invasion										Folder	WtCompMutant_RP_GFP-GPI_04032020
									Crop1	378-451							1	150	214	02:37:00	03:45:00	01:08:00	68				Frame Start	Frame Finish	Time Start	Time Finish	Total time	Time in sec				Frame Start	Frame Finish	Time Start	Time Finish	Total time	Time in sec					File name	WtCompMutant_GFP-GPI_2
																	2	215	372	03:46:00	06:33:00	02:47:00	167			1	141	201	02:46:00	03:58:00	01:12:00	72			1	256	283	04:40:00	05:10:00	00:30:00	30					Failed Invasion
									Folder	iKO_MIC7_SansRP_GFP-GPI_27022020																2	395	430	07:48:00	08:30:00	00:42:00	42			2	106	129	01:55:00	02:20:00	00:25:00	25					Frame Start	Frame Finish	Time Start	Time Finish
									File name	iKO_MIC7_SansRP_pdisp_2																3	503	572	09:57:00	11:19:00	01:22:00	82	Crop4		3	128	153	02:19:00	02:47:00	00:28:00	28				1	21	123	00:22:00	02:15:00
									Invasion																	4	607	697	12:01:00	13:48:00	01:47:00	107	Crop4												2	43	124	00:46:00	02:16:00
									Frame Start	Frame Finish	Time Start	Time Finish	Total time	Time in sec																						Folder	WtComp_RP_GFP-GPI_04032020
								1	138	163	02:38:00	03:07:00	00:29:00	29																						File name	WtComp_GFP-GPI_3
								2	231	260	04:26:00	05:00:00	00:34:00	34																						Invasion										Folder	WtCompMutant_RP_GFP-GPI_04032020
								3	287	334	05:31:00	06:26:00	00:55:00	55													Invasions:	5								Frame Start	Frame Finish	Time Start	Time Finish	Total time	Time in sec					File name	WtCompMutant_GFP-GPI_3
								4	219	252	04:12:00	04:51:00	00:39:00	39													Failed Invasions:	17							1	1	34	00:00:00	00:41:00	00:41:00	41	Crop4				Invasion
								5	98	116	01:52:00	02:13:00	00:21:00	21													Total	22																		Frame Start	Frame Finish	Time Start	Time Finish
																																													1	716	740	13:06:00	13:32:00
																																				Invasions:	10								2	340	383	06:13:00	07:00:00
									Crop2	196-328																										Failed Invasions:	4
																																					14
									Folder	iKO_MIC7_SansRP_GFP-GPI_28022020																																				Failed Invasion
									File name	iKO_MIC7_GFP-GPI_2																																				Frame Start	Frame Finish	Time Start	Time Finish
									Invasion																																				1	465	539	08:44:00	10:07:00
									Frame Start	Frame Finish	Time Start	Time Finish	Total time	Time in sec																															2	218	270	04:05:00	05:02:00
								1	89	118	01:40:00	02:13:00	00:33:00	33																															3	539	629	10:07:00	11:48:00
								2	164	196	03:05:00	03:42:00	00:37:00	37																															4	869	945	16:20:00	17:45:00
								3	255	295	04:49:00	05:35:00	00:46:00	46
								4	303	343	05:44:00	06:29:00	00:45:00	45
								5	242	269	04:34:00	05:05:00	00:31:00	31																																Invasions:	11	55
								6	137	163	02:35:00	03:04:00	00:29:00	29																																Failed Invasions:	9	45
								7	58	81	01:04:00	01:31:00	00:27:00	27																																	20	100
								8	519	559	09:50:00	10:36:00	00:46:00	46
								9	696	735	13:12:00	13:56:00	00:44:00	44
								10	636	660	12:08:00	12:31:00	00:23:00	23
								11	932	956	17:43:00	18:08:00	00:25:00	25
								12	804	841	15:15:00	15:51:00	00:36:00	36
								13	1072	1103	20:20:00	20:58:00	00:38:00	38
								14	894	927	16:58:00	17:36:00	00:38:00	38
								15	166	203	03:08:00	03:50:00	00:42:00	42
								16	322	404	06:05:00	07:39:00	01:34:00	74
								17	1239	1273	23:31:00	1 day, 0:10:00	00:39:00	39
								18	1162	1200	22:03:00	22:46:00	00:43:00	43
									Folder	iKO_MIC7_SansRP_GFP-GPI_28022020
									File name	iKO_MIC7_GFP-GPI_3
									Invasion
									Frame Start	Frame Finish	Time Start	Time Finish	Total time	Time in sec
								1	156	177	02:52:00	03:15:00	00:23:00	23
								2	485	518	08:57:00	09:33:00	00:36:00	36
								3	179	212	03:17:00	03:54:00	00:37:00	37
								4	47	111	00:51:00	02:02:00	01:11:00	71
								5	1064	1093	19:39:00	20:12:00	00:33:00	33
								6	1083	1118	20:01:00	20:39:00	00:38:00	38
								7	996	1022	18:24:00	18:52:00	00:28:00	28
								8	789	830	14:34:00	15:20:00	00:46:00	46
								9	1020	1069	18:51:00	19:45:00	00:54:00	54
								10	1141	1187	21:08:00	21:56:00	00:48:00	48
								11	1121	1155	20:43:00	21:20:00	00:37:00	37
									Crop4	1037-1174
									Folder	iKO_MIC7_SansRP_GFP-GPI_28022020
									File name	iKO_MIC7_GFP-GPI_4
									Invasion
									Frame Start	Frame Finish	Time Start	Time Finish	Total time	Time in sec
								1	9	33	00:08:00	00:35:00	00:27:00	27
								2	122	151	02:14:00	02:46:00	00:32:00	32
								3	185	213	03:24:00	03:55:00	00:31:00	31
								4	352	379	06:29:00	06:59:00	00:30:00	30
								5	242	288	04:27:00	05:19:00	00:52:00	52
								6	1	29	00:00:00	00:31:00	00:31:00	31
								7	92	121	01:41:00	02:13:00	00:32:00	32
								8	129	174	02:22:00	03:12:00	00:50:00	50
								9	157	185	02:53:00	03:24:00	00:31:00	31
								10	158	187	02:54:00	03:26:00	00:32:00	32
								11	283	310	05:13:00	05:47:00	00:34:00	34
								12	37	72	00:39:00	01:18:00	00:39:00	39
								13	148	168	02:43:00	03:05:00	00:22:00	22
								14	446	467	08:13:00	08:37:00	00:24:00	24
								15	487	506	08:59:00	09:20:00	00:21:00	21
								16	435	469	08:01:00	08:39:00	00:38:00	38
								17	96	121	01:45:00	02:13:00	00:28:00	28
								18	490	521	09:02:00	09:37:00	00:35:00	35
								19	1057	1093	19:32:00	20:12:00	00:40:00	40
								20	939	985	17:21:00	18:21:00	01:00:00	60
								21	281	315	05:10:00	05:46:00	00:36:00	36
								22	160	195	02:56:00	03:35:00	00:39:00	39
								23	1174	1193	21:42:00	22:02:00	00:20:00	20
								24	898	919	16:35:00	16:58:00	00:23:00	23
								25	1101	1128	20:21:00	20:50:00	00:29:00	29
									Crop5	320-480
									Crop6	1-100
									Crop7	260-400
									Invasions:	83
									Failed Invasions:	0
[truncated: 2 more columns]
