# Supplementary material for: Profiling of myristoylation in Toxoplasma gondii reveals an N-myristoylated protein important for host cell penetration
Source: eLife. 2020 Jul 3;9:e57861. doi: 10.7554/eLife.57861 (PMC7373427; doi:10.7554/eLife.57861)
Supplement: Supplementary file 1. — Identification of base-dependent YnMyr enrichment in T. gondii. Sheet 1: Toxoplasma proteins with YnMyr intensities quantified irrespective of base treatment. Sheet 2: Proteins with base-sensitive enrichment. Sheet 3: MG proteins insensitive to base treatment and robustly enriched in a YnMyr-dependent manner with N3-biotin reagent (1). Sheet 4: Analysis of proteomes (supernatants post enrichment). [file elife-57861-supp1.xlsx]

## Sheet: Legend
Supplementary file 1: Identification of base-dependent YnMyr enrichment in Toxoplasma gondii
Human foreskin fibroblasts were treated for 16 h with 25 µM YnMyr or 25 µM Myr upon infection with Toxoplasma. Following cell lysis, tagged proteins were captured with reagent 1 and treated with (-/+) base before enrichment on streptavidin beads. Pulled down proteins as well as the supernatants from enriched samples were digested with trypsin and analyzed by LC-MS/MS. The data were analyzed with …
Sheet 1: Toxoplasma proteins with YnMyr intensities quantified irrespective of base treatment
The data were filtered to remove host proteins and for the presence of 2 valid values in YnMyr treated samples. Next, missing LFQ intensities in Myr samples were imputed from the normal distribution in order to create fold changes (FC) and calculate YnMyr/Myr enrichment. LFQ intensities (before and after imputation) and the number of "razor + unique peptides" are displayed for each sample. In add…
Sheet 2: Proteins with base-sensitive enrichment
The data were filtered to retain only protein IDs for which Log2 FC YnMyr base/YnMyr <-1. Column GPI predictor indicates where positive prediction for the presence of GPI anchor motif was obtained using the Expassy GPI-SOM online predictor (http://gpi.unibe.ch).
Sheet 3: MG proteins insensitive to base and robustly enriched in a YnMyr-dependent manner with N3-biotin
The data were filtered to remove base sensitive hits and retain only protein IDs bearing the MG motif and Log2 FC YnMyr/Myr (irrespective of base)>2.
Sheet 4: Analysis of proteomes (supernatants post enrichment)
The data were filtered to remove host proteins and for the presence of at least 1 valid value. LFQ intensities and the number of "razor + unique peptides" are displayed for each sample. In addition, Log2 FC YnMyr/Myr, posterior error probability (PEP), MS/MS count and sequence coverage are shown for each protein ID.

## Sheet: All enriched
Protein IDs	Protein names	Signal Peptide	# TM Domains	Log2 FC YnMyr/Myr	Log2 FC YnMyr base/Myr base	Log2 FC YnMyr base /YnMyr	Imputed LFQ intensity Myr	Imputed LFQ intensity Myr base	Imputed LFQ intensity YnMyr	Imputed LFQ intensity YnMyr base	LFQ intensity Myr	LFQ intensity Myr base	LFQ intensity YnMyr	LFQ intensity YnMyr base	MG motif	Average Log2 FC YnMyr/Myr (-/+ base) >2	Selection N3-biotin	Base sensitive	PEP	MS/MS Count	Sequence coverage [%]	Razor + unique peptides Myr	Razor + unique peptides Myr base	Razor + unique peptides YnMyr	Razor + unique peptides YnMyr base	Intensity	Intensity Myr	Intensity Myr base	Intensity YnMyr	Intensity YnMyr base	Mol. weight [kDa]
TGVEG_263090;TGME49_263090;TGGT1_263090	14-3-3 protein	N/A	0	0.722399	1.07167	0.0831604	30.8014	30.5353	31.5238	31.607	30.8014	30.5353	31.5238	31.607					6.2776e-268	134	60.4	12	10	15	19	10.5406	9.24055	9.19179	10.1446	10.2409	37.173
TGVEG_267080;TGGT1_267080;TGME49_267080	26S protease regulatory subunit 4, putative;putative 26S protease regulatory subunit 4	N/A	0	7.20618	8.11477	0.56498	24.9169	24.5733	32.1231	32.6881	NaN	NaN	32.1231	32.6881	+	+	+		1.3968e-218	154	65.5	0	0	28	27	10.7156	NaN	NaN	10.3027	10.503	49.134
TGVEG_277500;TGME49_277500;TGGT1_277500	26S proteasome regulatory subunit 7, putative;putative 26S proteasome regulatory subunit 7	N/A	0	5.03515	5.69203	0.476589	24.5494	24.3691	29.5845	30.0611	NaN	NaN	29.5845	30.0611		+			1.5327e-70	35	33.8	0	0	9	14	9.94968	NaN	NaN	9.50421	9.70606	52.367
TGVEG_300310;TGME49_300310;TGGT1_300310	26S proteasome regulatory subunit, S6a family AAA ATpase	N/A	0	0.424034	2.40844	0.844612	25.1302	23.9904	25.5542	26.3988	NaN	NaN	25.5542	26.3988					2.7066e-24	12	22	0	0	5	5	8.7714	NaN	NaN	8.24311	8.61879	47.787
TGVEG_319920;TGME49_319920;TGGT1_319920	2-oxo acid dehydrogenases acyltransferase (catalytic domain) domain-containing protein	HMM: MLATRRVFSASPRLACARAGIAQAF, NN: MLATRRVFSASPRLACAR;HMM: MLATRRVFSASPRLVCARAGIAQAF, NN: MLATRRVFSASPRLVCARAGIAQAF	0	4.28451	4.91588	0.180653	23.7518	23.301	28.0363	28.2169	NaN	NaN	28.0363	28.2169		+			6.3996e-145	25	22.4	0	0	9	6	9.40821	NaN	NaN	9.13545	9.07693	70.304
TGVEG_271888;TGME49_271888;TGGT1_271888	3-ketoacyl-CoA reductase, putative;putative 3-ketoacyl-CoA reductase	N/A	1;2	0.582998	1.83415	0.584639	24.6234	23.9569	25.2064	25.7911	NaN	NaN	25.2064	25.7911					3.2012e-12	5	11.7	0	0	4	2	8.6201	NaN	NaN	8.29855	8.33868	37.496
TGGT1_221320;TGVEG_221320;TGME49_221320	acetyl-CoA carboxylase ACC1	HMM: MPIRTHARVRSVCTMGVVSRAAAA, NN: MPIRTHARVRSVCTMGVVSRAAAA;HMM: MPTRTHARVRSVCTMGVVSRAAAA, NN: MPTRTHARVRSVCTMGVVSRAAAA	1	-4.12127	-3.83898	1.05462	34.4422	35.2145	30.3209	31.3755	34.4422	35.2145	30.3209	31.3755					0	665	54.9	109	119	37	52	10.975	10.3756	10.7588	9.5893	9.97312	287.81
TGVEG_219320;TGME49_219320;TGGT1_219320	acid phosphatase GAP50	HMM: MAGAPVAAAPAASSRVAGDSGRSRALSSFFSVFSLCVFSVFLATPTAVVAQ, NN: MAGAPVAAAPAASSRVAGDSGRSRALSSFFSVFSLCVFSVFLATPTAVVAQ	2	0.704363	1.4438	0.979847	26.045	26.2854	26.7493	27.7292	26.045	26.2854	26.7493	27.7292					2.7119e-60	22	24.6	2	2	5	7	9.26179	7.596	7.82253	8.70022	9.08632	46.606
TGVEG_209030;TGME49_209030;TGGT1_209030	actin ACT1	N/A	0	-0.267477	0.299921	0.331402	31.121	30.885	30.8535	31.1849	31.121	30.885	30.8535	31.1849					1.0114e-236	121	67.8	13	11	17	16	10.4128	9.35019	9.34209	10.0087	10.0503	41.907
TGVEG_220400;TGGT1_220400;TGME49_220400	actin depolymerizing factor ADF	N/A	0	0.0257015	0.284243	-0.557324	28.742	27.9261	28.7677	28.2104	28.742	27.9261	28.7677	28.2104					4.8209e-32	24	48.3	3	3	5	5	9.62037	8.61154	8.5628	9.32773	9.10418	12.948
TGVEG_249900;TGME49_249900;TGGT1_249900	adenine nucleotide translocator, putative;putative adenine nucleotide translocator	N/A	4	1.58159	1.59296	-0.111563	28.494	28.3711	30.0756	29.964	28.494	28.3711	30.0756	29.964					5.4948e-291	88	56.9	9	7	15	18	10.0533	8.37486	8.47117	9.69169	9.76762	35.255
TGVEG_225050;TGME49_225050;TGGT1_225050;TGME49_326800	adenosylhomocysteinase, putative;putative adenosylhomocysteinase;S-Adenosyl homocysteine hydrolase	HMM: DALLRSSVSWLSRRDARRSPWWCTVMALTWGEGA, NN: DALLRSSVSWLSRRDARRSPWWCTVMALTWGEGAGP;HMM: MRALFLSQESDGFLSPLCFLPGSPSSSF, NN: MRALFLSQESDGFLSPLCFLPGSPSSSFPHILQKRQPFLSLFLFAKTSQSRGR;N/A	0	-0.590908	0.298826	0.715816	26.5389	26.365	25.948	26.6638	26.5389	26.365	25.948	26.6638					1.4124e-61	21	22.6	4	3	6	6	9.02024	7.92512	7.95446	8.63686	8.64354	64.084
TGVEG_276140;TGGT1_276140;TGME49_276140	ADP ribosylation factor ARF1	N/A	0	9.59178	9.37575	-0.358608	23.6156	23.473	33.2074	32.8488	NaN	NaN	33.2074	32.8488	+	+	+		5.3766e-68	80	57.9	1	1	8	7	10.9274	7.24895	7.40099	10.6443	10.6067	21.062
TGVEG_291800;TGME49_291800;TGGT1_291800	ADP-ribosylation factor family protein	N/A	0	5.46418	3.86242	-0.562393	23.2146	24.254	28.6788	28.1164	NaN	NaN	28.6788	28.1164	+	+	+		2.2941e-62	25	49.5	0	0	8	7	9.49415	NaN	NaN	9.31345	9.02612	22.39
TGVEG_262860;TGME49_262860;TGGT1_262860	ADP-ribosylation factor family protein 1, putative;putative ADP-ribosylation factor family protein 1	N/A	0	1.78768	0.906149	-0.813999	24.1125	24.18	25.9001	25.0861	NaN	NaN	25.9001	25.0861	+				1.451e-20	5	17.2	0	0	2	2	8.62803	NaN	NaN	8.40756	8.22802	20.176
TGVEG_226030;TGME49_226030;TGGT1_226030	AGC kinase	N/A	0	1.93923	0.762274	-1.02438	23.8217	23.9743	25.7609	24.7365	NaN	NaN	25.7609	24.7365				+	7.2723e-12	9	9.9	0	0	3	1	8.56623	NaN	NaN	8.45782	7.91041	39.41
TGVEG_218820;TGME49_218820;TGGT1_218820	alba 2	N/A	0	0.176504	2.89576	-0.24025	26.4444	23.4849	26.6209	26.3806	26.4444	NaN	26.6209	26.3806					6.8609e-18	12	33.8	2	1	5	2	9.00651	7.82723	7.31029	8.78104	8.50978	15.391
TGVEG_217890;TGME49_217890;TGGT1_217890	alkyl hydroperoxide reductase/ Thiol specific antioxidant/ Mal allergen, putative;putative alkyl hydroperoxide reductase/ Thiol specific antioxidant/ Mal allergen	N/A	0	0.217053	2.35235	-0.501431	27.3648	24.7281	27.5818	27.0804	27.3648	NaN	27.5818	27.0804					1.5541e-55	32	59.2	3	1	7	8	9.30865	7.85297	7.69622	8.9933	8.96837	21.722
TGGT1_316400B;TGVEG_316400;TGME49_316400	alpha tubulin TUBA1	N/A	0	-0.392742	0.39287	0.402184	28.0384	27.655	27.6457	28.0479	28.0384	27.655	27.6457	28.0479					1.7712e-184	33	48.1	4	4	6	8	9.4841	8.32042	8.29846	8.98599	9.22334	47.849
TGGT1_262490;TGVEG_262490;TGME49_262490	alpha/beta hydrolase, putative;putative alpha/beta hydrolase	N/A	0	4.17556	4.04853	0.101419	24.0545	24.283	28.2301	28.3315	NaN	NaN	28.2301	28.3315	+	+	+		2.7026e-40	21	41.5	0	0	8	6	9.44915	NaN	NaN	9.13988	9.15622	29.068
TGVEG_231640;TGME49_231640;TGGT1_231640	alveolin domain containing intermediate filament IMC1	N/A	0	5.09979	5.73775	-1.75191	27.2468	24.8569	32.3466	30.5947	27.2468	NaN	32.3466	30.5947		+		+	0	121	55.3	4	1	31	23	10.5012	8.18667	7.57653	10.4007	9.80311	69.596
TGVEG_230210;TGME49_230210;TGGT1_230210	alveolin domain containing intermediate filament IMC10	N/A	0	1.87413	0.657116	-0.690245	24.0609	24.5877	25.9351	25.2448	NaN	NaN	25.9351	25.2448					3.5861e-41	8	12.9	0	0	5	3	8.6536	NaN	NaN	8.5021	8.12267	61.187
TGVEG_231630;TGME49_231630;TGGT1_231630	alveolin domain containing intermediate filament IMC4	N/A	0	4.49493	2.06451	-2.19873	26.6385	26.8702	31.1334	28.9347	26.6385	26.8702	31.1334	28.9347		+		+	7.5228e-83	49	36.7	3	5	13	8	10.1116	7.86345	8.09384	10.0162	9.37166	50.171
TGVEG_220270;TGME49_220270;TGGT1_220270	alveolin domain containing intermediate filament IMC6	N/A	0	2.8003	2.54238	-1.13514	24.4848	23.6075	27.2851	26.1499	NaN	NaN	27.2851	26.1499		+		+	7.4641e-39	10	14.9	0	0	6	3	9.01456	NaN	NaN	8.91643	8.32035	48.634
TGVEG_224460;TGME49_224460;TGGT1_224460	aminopeptidase n, putative;putative aminopeptidase n	HMM: MVTLSATTMNATVSPCRISGGVSSRLCGWGVLSFLLASVITVQVSRAG, NN: MVTLSATTMNATVSPCRISGGVSSRLCGWGVLSFLLASVITVQVSRAG	0	-0.297666	1.17787	0.571241	25.4142	24.5099	25.1165	25.6878	25.4142	NaN	25.1165	25.6878					2.8682e-29	17	12.1	3	1	6	7	8.68916	7.43954	NaN	8.19457	8.48401	108.75
TGVEG_224350;TGME49_224350;TGGT1_224350A	aminopeptidase N, putative;putative aminopeptidase N	N/A	0;1	2.15745	2.00682	0.499472	23.6553	24.3054	25.8128	26.3123	NaN	NaN	25.8128	26.3123		+			2.0583e-26	16	8.5	3	1	5	7	8.82302	7.64466	7.00398	8.33975	8.59377	156.88
TGGT1_255260;TGVEG_255260;TGME49_255260	apical membrane antigen AMA1	N/A	1	5.96642	5.44937	-0.324221	24.4658	24.6586	30.4322	30.108	NaN	NaN	30.4322	30.108		+			2.6499e-117	63	31.1	0	0	14	11	10.0544	NaN	NaN	9.8476	9.63281	63.02
TGVEG_261440;TGME49_261440;TGGT1_261440	ARM repeats containing protein	N/A	0	5.4058	5.94844	0.291391	25.544	25.2927	30.9498	31.2412	NaN	NaN	30.9498	31.2412	+	+	+		7.5898e-153	58	39.1	0	0	12	12	10.3099	NaN	NaN	9.94569	10.064	30.509
TGVEG_253430;TGME49_253430;TGGT1_253430	asparagine synthetase, putative;putative asparagine synthetase	N/A	0	-0.466385	-0.028368	0.55389	27.4393	27.5552	26.9729	27.5268	27.4393	27.5552	26.9729	27.5268					5.9924e-30	27	20.1	5	5	7	9	9.32091	8.14866	8.3199	8.84014	9.02197	65.868
TGGT1_270510;TGME49_270510;TGVEG_270510	asparaginyl-tRNA synthetase (NOB+tRNA synthase)	HMM: MPRRCWQLFVCCSVREFPVSVASRLLLPLLFVLASARNSALLYSSALTLRSSAAPLAFSS, NN: MPRRCWQLFVCCSVREFPVSVASRLLLPLLFVLASAR	0	-0.412016	0.238562	0.429563	29.2476	29.0265	28.8355	29.2651	29.2476	29.0265	28.8355	29.2651					2.8035e-73	73	33.6	16	12	16	15	9.80333	8.84005	8.75449	9.325	9.47487	74.918
TGVEG_261950;TGME49_261950;TGGT1_261950	ATP synthase beta subunit ATP-B	N/A	0	-1.05624	-0.550568	0.130302	28.06	27.6847	27.0038	27.1341	28.06	27.6847	27.0038	27.1341					9.1839e-62	31	36.4	10	5	8	7	9.24165	8.52902	8.32924	8.75797	8.79248	59.916
TGVEG_284540;TGME49_284540;TGGT1_284540	ATP synthase F1, delta subunit protein	N/A	0	2.73409	1.46741	-1.00153	25.0243	25.2894	27.7584	26.7568	25.0243	NaN	27.7584	26.7568				+	3.0082e-26	17	27.8	2	0	6	5	9.19504	7.22102	NaN	9.02812	8.68421	27.635
TGVEG_266960;TGME49_266960;TGGT1_266960	beta tubulin;beta-tubulin	N/A	0	-0.273388	0.63217	0.717915	28.5124	28.3248	28.239	28.957	28.5124	28.3248	28.239	28.957					3.9856e-119	54	51.9	11	8	9	8	9.62143	8.67973	8.62106	9.12859	9.28816	50.073
TGGT1_220320;TGVEG_220320;TGME49_220320	BSD domain-containing protein	N/A	0	1.88843	3.94109	-0.0520439	25.073	22.9683	26.9615	26.9094	NaN	NaN	26.9615	26.9094	+				7.5914e-28	12	27.9	0	0	5	5	9.04477	NaN	NaN	8.79507	8.68554	34.237
TGVEG_228750;TGME49_228750;TGGT1_228750	calcium dependent protein kinase CDPK7	N/A	0	2.27256	2.99309	0.656139	24.1595	24.0951	26.4321	27.0882	NaN	NaN	26.4321	27.0882	+	+	+		1.7592e-23	10	3.6	0	0	5	4	9.00173	NaN	NaN	8.64966	8.74638	219.34
TGVEG_301440;TGME49_301440;TGGT1_301440	calcium-dependent protein kinase CDPK1	N/A	0	8.86391	10.4449	0.538239	24.67	23.6272	33.5339	34.0722	24.67	23.6272	33.5339	34.0722	+	+	+		0	194	56.5	4	2	26	27	11.1277	7.91355	7.56957	10.7273	10.9068	65.421
TGVEG_206590;TGME49_206590;TGGT1_206590	calcium-dependent protein kinase CDPK2A	N/A	0	7.47578	7.82474	0.120268	22.8599	22.6312	30.3356	30.4559	NaN	NaN	30.3356	30.4559		+			5.1425e-128	83	36.3	0	0	23	23	10.0932	NaN	NaN	9.78179	9.80224	86.364
TGVEG_305860;TGME49_305860;TGGT1_305860	calcium-dependent protein kinase CDPK3	N/A	0	9.2763	8.7304	0.413425	23.1811	24.1404	32.4574	32.8708	NaN	NaN	32.4574	32.8708	+	+	+		5.5977e-233	154	62.2	0	0	31	28	10.7837	NaN	NaN	10.4487	10.5142	60.429
TGVEG_269442;TGME49_269442;TGGT1_269442	calmodulin, putative;putative calmodulin	N/A	0	4.69358	4.55562	-0.259809	23.668	23.5462	28.3616	28.1018	NaN	NaN	28.3616	28.1018		+			8.49e-09	6	24.1	1	0	2	2	9.43989	7.32401	NaN	9.17754	9.08899	9.7801
TGVEG_305050;TGME49_305050;TGGT1_305050	calmodulin, putative;putative calmodulin	N/A	0	4.22703	4.56671	-0.724434	23.9145	22.8504	28.1415	27.4171	NaN	NaN	28.1415	27.4171		+			2.1029e-83	16	68.4	0	0	7	3	9.31484	NaN	NaN	9.21128	8.6414	15.277
TGGT1_310320;TGVEG_310320;TGME49_310320	calreticulin family protein	HMM: MSANRTPCMSAVPGLSSTSVSSRLSFSILALLTFVALHTLLPD, NN: MSANRTPCMSAVPGLSSTSVSSRLSFSILALLTFVALHTLLPD	2	1.10134	2.62447	0.346588	24.7081	23.5316	25.8095	26.1561	NaN	NaN	25.8095	26.1561					3.9472e-20	9	12.6	0	0	4	5	8.75865	NaN	NaN	8.30205	8.57192	64.101
TGVEG_253940;TGGT1_253940;TGME49_253940	CAM Kinase family, incomplete catalytic triad	N/A	0	0.839025	1.44204	0.703093	24.2243	24.3244	25.0634	25.7665	NaN	NaN	25.0634	25.7665	+				1.2499e-06	6	5.8	0	0	3	3	8.59712	NaN	NaN	8.11541	8.42331	64.485
TGVEG_242070;TGME49_242070;TGGT1_242070	cAMP-dependent protein kinase regulatory subunit	N/A	0	6.92181	9.90313	-0.476776	27.4516	23.9935	34.3734	33.8966	27.4516	NaN	34.3734	33.8966	+	+	+		1.2432e-209	253	60.3	4	1	26	23	11.2552	8.08282	7.40724	11.0458	10.8362	42.796
TGGT1_232250;TGVEG_232250;TGME49_232250	catalase	N/A	0	-0.793859	0.398836	0.19899	27.6487	26.655	26.8548	27.0538	27.6487	26.655	26.8548	27.0538					1.5856e-35	30	21.9	7	2	8	6	9.18313	8.31071	8.09892	8.8255	8.7204	57.27
TGVEG_205440;TGME49_205440;TGGT1_205440	CCT chaperonin gamma subunit	N/A	0	0.249046	3.7922	0.0848103	26.0217	22.5633	26.2707	26.3555	26.0217	NaN	26.2707	26.3555					1.8688e-28	16	20.7	2	2	7	8	8.95979	7.5944	7.4624	8.65914	8.58782	60.697
TGVEG_273090;TGME49_273090;TGGT1_273090	cell division protein CDC48CY;transitional endoplasmic reticulum ATPase, putative	N/A	0	0.392759	2.3571	0.811871	24.9874	23.8349	25.3801	26.192	NaN	NaN	25.3801	26.192					1.7574e-41	14	16.3	2	0	5	7	8.76976	7.47132	NaN	8.19493	8.58187	89.396
TGVEG_240600;TGME49_240600;TGGT1_240600	chaperonin cpn60, putative;putative chaperonin cpn60	N/A	1	-0.0348244	-0.11898	0.287706	24.3277	24.6995	24.2928	24.5805	NaN	NaN	24.2928	24.5805					6.3607e-10	7	4.9	1	0	3	2	8.31515	6.98129	NaN	8.03575	7.94669	72.236
TGVEG_311720;TGME49_311720;TGGT1_311720	chaperonin protein BiP	HMM: MTAAKKLSLFSLAALFCLLSVATLRPVAAS, NN: MTAAKKLSLFSLAALFCLLSVATLRPVAAS	1	-0.0683212	0.695997	0.14909	29.1608	28.5456	29.0925	29.2416	29.1608	28.5456	29.0925	29.2416					4.1721e-184	74	39.7	14	6	16	19	9.82346	8.81066	8.53049	9.41802	9.48511	73.252
TGVEG_260500;TGME49_260500;TGGT1_260500	COPI associated protein, putative;putative COPI associated protein	N/A	4	3.13006	2.45032	-0.173155	23.2702	23.7768	26.4003	26.2271	NaN	NaN	26.4003	26.2271		+			1.7501e-08	6	12.2	0	0	2	3	8.8778	NaN	NaN	8.52442	8.62348	29.924
TGVEG_240550;TGME49_240550;TGGT1_240550	copper chaperone COX17-1, putative;putative copper chaperone COX17-1	N/A	0	2.95329	2.88353	0.270874	23.4412	23.7818	26.3944	26.6653	NaN	NaN	26.3944	26.6653	+	+	+		9.235e-12	8	28.6	0	0	1	2	8.923	NaN	NaN	8.55175	8.68239	8.1951
TGVEG_310030;TGME49_310030;TGGT1_310030	cyclase-associated protein, putative;putative cyclase-associated protein	N/A	0	0.710268	-0.152685	-0.0349064	24.0953	24.9234	24.8056	24.7707	NaN	NaN	24.8056	24.7707					5.4988e-13	7	15.8	1	0	3	2	8.42602	7.21455	NaN	8.15848	8.02641	22.483
TGVEG_205700;TGME49_205700;TGGT1_205700	cyclophilin precursor	N/A	1	-0.0356579	0.345669	0.151474	27.6635	27.4336	27.6278	27.7793	27.6635	27.4336	27.6278	27.7793					5.3282e-22	16	21	5	2	3	4	9.38083	8.38881	8.27471	8.90267	9.06859	38.193
TGVEG_219750;TGME49_219750;TGGT1_219750	cytochrome c, putative;putative cytochrome c	N/A	0	1.34517	1.83749	-0.049984	25.0178	24.4755	26.363	26.313	25.0178	NaN	26.363	26.313					3.1576e-14	12	32.2	1	0	3	3	8.90333	7.36665	NaN	8.5952	8.58372	12.453
TGVEG_246540;TGME49_246540;TGGT1_246540	cytochrome c1, heme protein	N/A	1	1.57736	1.81713	-0.250216	26.8818	26.3918	28.4592	28.209	26.8818	26.3918	28.4592	28.209	+				6.0979e-57	20	17.8	2	2	5	5	9.53647	7.97775	7.57968	9.22121	9.2154	45.968
TGVEG_315770;TGME49_315770;TGGT1_315770	cytochrome p450 superfamily protein	N/A	1	0.733517	1.46953	0.309467	23.98	23.5534	24.7135	25.023	NaN	NaN	24.7135	25.023					2.4718e-13	12	7.4	1	1	4	3	8.44864	6.87091	6.88758	8.15088	8.09437	62.584
TGVEG_219540;TGME49_219540;TGGT1_219540	cytosolic tRNA-Ala synthetase	HMM: MLDVPILCALLVLLLSSLPAGAGAL, NN: MLDVPILCALLVLLLSSLPAGAGAL	0	-0.213045	1.04379	1.00217	26.9223	26.6676	26.7092	27.7114	26.9223	26.6676	26.7092	27.7114					2.5402e-61	32	16.6	5	4	10	10	9.23837	8.10006	8.086	8.77695	8.94699	139.29
TGVEG_216860;TGME49_216860;TGGT1_216860	DEAD (Asp-Glu-Ala-Asp) box polypeptide DDX39	N/A	0	0.287289	0.096056	-0.00868034	27.359	27.5416	27.6463	27.6376	27.359	27.5416	27.6463	27.6376					1.8495e-41	38	30	6	5	9	8	9.39893	8.1835	8.22567	9.05983	9.0159	49.113
TGVEG_226250;TGME49_226250;TGGT1_226250	DEAD (Asp-Glu-Ala-Asp) box polypeptide DDX3X	N/A	0	2.21302	2.36086	0.728779	23.2329	23.8139	25.4459	26.1747	NaN	NaN	25.4459	26.1747		+			1.5323e-41	15	13.8	2	1	3	7	8.73043	6.93709	6.99918	7.89556	8.64375	78.592
TGGT1_270250;TGVEG_270250;TGME49_270250	dense granule protein GRA1	HMM: MVRVSAIVGAAASVFVCLSAGAYAA, NN: MVRVSAIVGAAASVFVCLSAGAYAA	0	0.97884	0.669081	-0.140232	24.0798	24.2493	25.0587	24.9184	NaN	NaN	25.0587	24.9184					3.093e-25	7	28.9	0	0	4	3	8.46114	NaN	NaN	8.32913	7.87959	20.149
TGVEG_288650;TGME49_288650;TGGT1_288650	dense granule protein GRA12	HMM: MRAIMASTQQFLRPVGSRPLAGISVVVVVALAIALGTAA, NN: MRAIMASTQQFLRPVGSRPLAGISVVVVVALAIALGTAA;HMM: MRAIVASTQQFLRPVGSRPLAGISIVVVVALAIALGTAA, NN: MRAIVASTQQFLRPVGSRPLAGISIVVVVALAIALGTAA	1	-0.770016	0.0583553	1.40009	28.9338	29.5055	28.1637	29.5638	28.9338	29.5055	28.1637	29.5638					9.4039e-87	67	42.9	6	9	11	17	9.84791	8.56658	8.94827	9.09916	9.65635	47.955
TGGT1_227620;TGME49_227620;TGVEG_227620	dense granule protein GRA2	HMM: MFAVKHCLLVVAVGALVNVSVRAA, NN: MFAVKHCLLVVAVGALVNVSVRAA	0	-0.884752	-1.87708	0.496109	30.8885	32.3769	30.0037	30.4998	30.8885	32.3769	30.0037	30.4998					5.6982e-39	72	48.6	7	6	6	7	10.3308	9.30153	9.8529	9.71264	9.85322	19.842
TGVEG_227280;TGGT1_227280;TGME49_227280	dense granule protein GRA3	HMM: MDRTICPFFIQSFTMSTALKRLIPFLVPFVVFLVAAALGGLAA, NN: MDRTICPFFIQSFTMSTALKRLIPFLVPFVVFLVAAALGGLAAD	2	0.00875664	3.17132	-0.268717	26.6918	23.2605	26.7006	26.4318	26.6918	NaN	26.7006	26.4318					1.137e-13	14	14.9	2	1	3	3	9.06659	8.06963	7.90813	8.72963	8.63433	24.18
TGGT1_203310;TGME49_203310;TGVEG_203310	dense granule protein GRA7	HMM: MARHAIFFALCVLGLVAAALPQFATAA, NN: MARHAIFFALCVLGLVAAALPQFATAA;HMM: MARHAIFSALCVLGLVAAALPQFATAA, NN: MARHAIFSALCVLGLVAAALPQFATAA	2	-1.53687	-0.858389	1.33997	28.7287	29.3902	27.1919	28.5319	28.7287	29.3902	27.1919	28.5319					7.8174e-79	40	45.3	7	7	7	7	9.56444	8.66854	8.9612	8.81303	9.2141	25.857
TGVEG_285680;TGME49_285680;TGGT1_285680	dihydrolipoamide acyltransferase, putative;putative dihydrolipoamide acyltransferase	N/A	0	1.3666	1.43869	-0.0615864	24.1435	24.0098	25.5101	25.4485	NaN	NaN	25.5101	25.4485					2.9315e-48	8	8.2	0	0	2	2	8.60595	NaN	NaN	8.31917	8.29019	38.875
TGVEG_219550;TGME49_219550;TGGT1_219550	dihydrolipoyllysine-residue succinyltransferase component of oxoglutarate dehydrogenase	HMM: MPVLAAAAAASRRGLSSLLLPVECR, NN: MPVLAAAAAASRRGLSSLLLPVECR	0	2.5026	1.9957	0.249582	23.5709	24.3274	26.0735	26.3231	NaN	NaN	26.0735	26.3231					5.0451e-18	6	8.9	0	0	2	3	8.8208	NaN	NaN	8.20008	8.7019	50.125
TGVEG_259550;TGME49_259550;TGGT1_259550	dihydropteroate synthase	HMM: MGCWPPSFACLRLSWWNLPLFHKRSAFFFWPPPGLRLRPLPGGAIAHCASSR, NN: MGCWPPSFACLRLSWWNLPLFHKRSAFFFWPPPGLRLR;HMM: MGCWPPSFACLRLSWWNLPLFHKRSAFFFWPPPGLRLRSLPGGAIAHCASSR, NN: MGCWPPSFACLRLSWWNLPLFHKRSAFFFWPPPGLRLR	0	-0.0231724	1.73904	0.666742	24.9558	23.8603	24.9326	25.5993	NaN	NaN	24.9326	25.5993	+				3.0162e-16	8	10.8	0	1	3	5	8.55097	NaN	NaN	8.06408	8.37969	82.684
TGVEG_214290;TGME49_214290;TGGT1_214290	DJ-1 family protein	HMM: MSPLGFGAFLSPLLLFCVSPHLRTGV, NN: MSPLGFGAFLSPLLLFCVSPHLRTG	0	0.808084	1.74051	0.389055	24.3006	23.7572	25.1087	25.4977	NaN	NaN	25.1087	25.4977					1.8342e-17	7	24.2	0	0	2	4	8.55453	NaN	NaN	8.0545	8.38943	27.904
TGVEG_267430;TGME49_267430;TGGT1_267430	DnaJ domain-containing protein	N/A	4	-0.00734711	0.112804	0.041357	24.1322	24.0534	24.1249	24.1662	NaN	NaN	24.1249	24.1662					3.327e-31	6	12.7	0	0	3	3	8.20434	NaN	NaN	7.91213	7.89428	48.936
TGVEG_311240;TGME49_311240;TGGT1_311240	DnaJ family chaperone, putative;putative DnaJ family chaperone	N/A	0	-0.395718	0.927748	0.388596	25.2313	24.2964	24.8356	25.2242	25.2313	NaN	24.8356	25.2242					6.8989e-11	8	9.9	2	1	2	3	8.60037	7.3965	7.1951	8.02473	8.4014	47.448
TGVEG_260630;TGGT1_260630;TGME49_260630	DnaJ family Sec63 protein	N/A	3	1.4782	2.79143	0.754406	24.482	23.9232	25.9602	26.7146	NaN	NaN	25.9602	26.7146					1.9954e-27	13	17.3	0	0	3	9	8.87561	NaN	NaN	8.23477	8.76287	76.759
TGME49_219310;TGGT1_219310;TGVEG_219310	DnaK family protein	N/A	0	0.891567	0.619234	0.853342	24.6325	25.7582	25.5241	26.3774	NaN	25.7582	25.5241	26.3774					6.1616e-35	19	13.3	1	3	6	8	8.85483	7.11919	7.73575	8.23686	8.67739	90.142
TGME49_226410;TGGT1_226410;TGVEG_226410	EF-1 guanine nucleotide exchange domain-containing protein	HMM: MRAAAKSLPSRWSSVRLRCEKVPACFCATSSPPGGRST, NN: MRAAAKSLPSRWSSVRLRCE;N/A	0	-0.0340004	0.684135	0.626162	26.47	26.3781	26.436	27.0622	26.47	26.3781	26.436	27.0622					9.0302e-16	14	20.7	2	2	4	6	9.13609	7.84055	7.87126	8.55985	8.93524	36.049
TGVEG_294800;TGVEG_286420;TGME49_294800;TGME49_286420;TGGT1_286420A;TGGT1_294800B;TGGT1_359490;TGGT1_294800A;TGGT1_286420B	elongation factor 1-alpha;elongation factor 1-alpha (EF-1-ALPHA), putative;putative elongation factor 1-alpha (EF-1-ALPHA)	N/A	0	-0.0184097	0.545643	0.302631	32.4598	32.1984	32.4414	32.744	32.4598	32.1984	32.4414	32.744	+				1.1917e-158	219	62.7	16	14	19	25	10.9026	9.73597	9.79262	10.4326	10.5785	49.005
TGVEG_268850;TGME49_268850;TGGT1_268850	enolase 1;enolase 2	N/A	0	-0.173006	0.25198	0.23649	28.7844	28.5959	28.6114	28.8479	28.7844	28.5959	28.6114	28.8479					2.1981e-147	36	39.4	6	5	8	9	9.74763	8.46517	8.65794	9.32919	9.43329	52.113
TGGT1_232815;TGVEG_232815;TGME49_232815	Erv1 / Alr family protein	N/A	0	1.71254	1.98158	-0.563416	25.3944	24.5619	27.1069	26.5435	NaN	NaN	27.1069	26.5435	+				1.6858e-25	10	15.7	0	0	3	2	9.02185	NaN	NaN	8.89556	8.42384	27.622
TGVEG_250770;TGME49_250770;TGGT1_250770	eukaryotic initiation factor-4A, putative;putative eukaryotic initiation factor-4A	N/A	0	0.228706	0.2535	0.144777	28.5431	28.6631	28.7718	28.9166	28.5431	28.6631	28.7718	28.9166					3.7153e-213	48	42.2	7	7	11	10	9.7418	8.40875	8.76501	9.3587	9.37945	46.673
TGVEG_263300;TGME49_263300;TGGT1_263300	eukaryotic porin protein	N/A	0	1.02928	2.08202	-0.327971	28.3762	26.9955	29.4055	29.0775	28.3762	26.9955	29.4055	29.0775					7.7969e-77	43	45.2	6	3	10	9	9.79307	8.55868	8.11334	9.5263	9.37258	31.352
TGVEG_249530;TGME49_249530;TGGT1_249530	exportin 1, putative;putative exportin 1	N/A	0	-0.0479107	0.305903	0.592585	23.9666	24.2054	23.9187	24.5113	NaN	NaN	23.9187	24.5113					6.8561e-09	5	3.6	0	0	3	2	8.23355	NaN	NaN	7.88274	7.97718	129.09
TGVEG_214320;TGME49_214320;TGGT1_214320	facilitative glucose transporter GT1	N/A	12	3.85334	2.65643	-0.366133	23.9596	24.7904	27.8129	27.4468	NaN	NaN	27.8129	27.4468		+			1.8421e-25	15	10.2	0	0	6	6	9.25739	NaN	NaN	9.0182	8.88424	61.687
TGVEG_236040;TGME49_236040;TGGT1_236040;TGME49_236050	fructose-1,6-bisphosphate aldolase;fructose-bisphosphate aldolase, putative;putative fructose-bisphosphate aldolase	N/A	0;1	0.27886	0.672218	0.0169964	30.2533	29.8769	30.5321	30.5491	30.2533	29.8769	30.5321	30.5491					1.3932e-120	90	35.3	11	11	16	16	10.2437	9.01553	9.05793	9.87808	9.89179	46.96
TGVEG_247510;TGME49_247510;TGGT1_247510	fructose-bisphospatase II	N/A	0	-0.055912	2.56329	0.424717	26.2391	24.0447	26.1832	26.608	26.2391	NaN	26.1832	26.608					6.1196e-21	16	20.2	5	1	4	6	8.94012	7.89904	7.46211	8.34924	8.73198	42.397
TGVEG_249850;TGME49_249850;TGGT1_249850	GAP40 protein	N/A	9	5.01749	4.06903	0.132301	23.3617	24.4424	28.3792	28.5114	NaN	NaN	28.3792	28.5114		+			1.5543e-42	16	11.9	1	0	4	3	9.50865	7.82683	NaN	9.23842	9.15452	43.081
TGVEG_223940;TGGT1_223940;TGME49_223940	GAP45;GAP45 protein	N/A	0	7.75895	9.09334	-0.262016	26.8748	25.2784	34.6337	34.3717	26.8748	25.2784	34.6337	34.3717	+	+	+		0	160	75.9	4	4	22	26	11.3454	8.09181	7.7265	11.087	10.9963	27.318
TGVEG_271970;TGME49_271970;TGGT1_271970	glideosome-associated protein with multiple-membrane spans GAPM3	N/A	5	5.01675	3.36887	-1.66709	24.7113	24.6921	29.7281	28.061	NaN	NaN	29.7281	28.061		+		+	1.7684e-24	21	26.1	0	0	5	4	9.70876	NaN	NaN	9.60639	9.03096	34.282
TGGT1_233030;TGVEG_233030;TGME49_233030	gliding-associated protein GAP70	N/A	0	5.48676	5.79146	0.0546589	24.1495	23.8994	29.6362	29.6909	NaN	NaN	29.6362	29.6909	+	+	+		3.8536e-74	48	55.5	0	0	16	15	9.86932	NaN	NaN	9.54508	9.59031	38.66
TGVEG_278830;TGME49_278830;TGGT1_278830	glucose-6-phosphate 1-dehydrogenase	N/A	0	0.00198746	1.39809	0.523312	24.4129	23.5401	24.4149	24.9382	NaN	NaN	24.4149	24.9382					5.4921e-21	11	7.6	1	1	3	5	8.40564	6.86226	7.14582	7.66665	8.27133	98.279
TGVEG_294200;TGME49_294200;TGGT1_294200	glucose-6-phosphate 1-dehydrogenase	HMM: MAPENGRSSYSAYIRLLWLLTAVTAASAL, NN: MAPENGRSSYSAYIRLLWLLTAVTAASAL	1	1.38186	3.19823	0.300125	25.3709	23.8547	26.7528	27.0529	NaN	NaN	26.7528	27.0529					3.6073e-63	21	33.9	1	3	6	11	9.05526	NaN	7.72183	8.55607	8.85927	62.736
TGVEG_285980;TGME49_285980;TGGT1_285980B	glucosephosphate-mutase GPM1	N/A	0	8.14958	9.10292	0.448704	24.4853	23.9806	32.6349	33.0836	NaN	NaN	32.6349	33.0836	+	+	+		0	192	61.2	1	1	30	28	10.8467	6.76675	7.39157	10.4919	10.5932	70.572
TGVEG_249390;TGME49_249390;TGGT1_249390	glutamate/leucine/phenylalanine/valine dehydrogenase family protein	HMM: MVHVSASLPFSFFPRFFLSQPRGTRSF, NN: MVHVSASLPFSFFPRFFLSQPRGTRSF;HMM: MVHVSASLPFSFFPRLFLSQPRGTRSI, NN: MVHVSASLPFSFFPRLFLSQPRGTRSI	0	-0.708036	1.22671	0.945642	25.6617	24.6726	24.9537	25.8993	NaN	24.6726	24.9537	25.8993					1.3576e-23	12	6.8	1	2	3	7	8.68693	6.99869	7.30893	8.01695	8.54656	135.7
TGVEG_289690;TGME49_289690;TGGT1_289690	glyceraldehyde-3-phosphate dehydrogenase GAPDH1	N/A	0	-1.06395	-0.230364	-0.711052	31.5002	29.9556	30.4363	29.7252	31.5002	29.9556	30.4363	29.7252					1.5037e-105	85	43.6	14	7	12	10	10.1866	9.5287	8.99563	9.84473	9.60244	53.339
TGME49_202960;TGGT1_202960;TGVEG_202960	glycine cleavage H-protein	N/A	0	2.02574	2.36307	0.193926	24.6478	24.5044	26.6736	26.8675	NaN	NaN	26.6736	26.8675		+			2.7393e-33	9	13.4	0	0	4	3	8.99563	NaN	NaN	8.71656	8.67147	32.453
TGVEG_214790;TGME49_214790;TGGT1_214790	glycoprotein	N/A	0	1.6627	3.89285	-0.135147	26.5434	24.1781	28.2061	28.0709	26.5434	NaN	28.2061	28.0709					5.4171e-28	20	20.1	3	0	5	6	9.42426	7.97779	NaN	9.12277	9.09146	31.444
TGVEG_256990;TGME49_256990;TGGT1_256990	glycyl-tRNA synthetase	N/A	0	0.741064	0.687145	0.468512	23.8131	24.3356	24.5542	25.0227	NaN	NaN	24.5542	25.0227					6.3644e-21	7	7	0	1	2	4	8.42308	NaN	7.12895	7.77501	8.28303	86.339
TGVEG_261980;TGGT1_261980	gorasp2-prov protein	N/A	0	4.39607	2.85291	-0.402504	23.0809	24.2216	27.477	27.0745	NaN	NaN	27.477	27.0745	+	+	+		1.0804e-55	9	10.9	0	0	3	3	9.15005	NaN	NaN	8.8	8.89306	50.485
TGVEG_248340;TGME49_248340;TGGT1_248340	GTP-binding nuclear protein ran/tc4	N/A	0	0.313572	3.30798	-0.0748863	27.3761	24.3068	27.6897	27.6148	27.3761	NaN	27.6897	27.6148					1.2615e-34	28	47.6	4	2	6	6	9.33961	8.13922	7.71477	9.00681	8.98109	25.997
TGVEG_214350;TGME49_214350;TGGT1_214350	GTP-binding protein, putative;putative GTP-binding protein	N/A	0	-0.369236	1.45292	0.898531	24.9112	23.9876	24.542	25.4405	NaN	NaN	24.542	25.4405					8.0546e-13	5	12.6	0	0	2	4	8.47619	NaN	NaN	7.79815	8.3739	44.547
TGVEG_216880;TGME49_216880;TGGT1_216880	guanine nucleotide-binding protein	N/A	0	-0.24486	0.201479	0.142565	28.5488	28.245	28.304	28.4465	28.5488	28.245	28.304	28.4465					9.3135e-56	47	45.2	9	6	10	9	9.61601	8.62139	8.39637	9.25967	9.21617	35.147
TGVEG_251780;TGME49_251780;TGGT1_251780	heat shock protein	HMM: MASMAAGASLAYRASYCSGA, NN: MASMAAGASLAYRASYCSGA	0	2.15757	4.14916	0.335964	24.6644	23.0088	26.822	27.158	NaN	NaN	26.822	27.158		+			1.0126e-47	21	21.3	1	0	6	12	9.06371	6.84433	NaN	8.53296	8.9084	78.25
TGVEG_244560;TGME49_244560;TGGT1_244560	heat shock protein 90, putative;putative heat shock protein 90	HMM: MSPAGRRTPKKLAFAALLLGVSVACTSSFFSASVAPSALWVAAT, NN: MSPAGRRTPKKLAFAALLLGVSVAC;HMM: MSPAGRRTPKKLAFAALLLGVSVACTSSFFSASVSPSALWVAAT, NN: MSPAGRRTPKKLAFAALLLGVSVAC	1	-0.0271816	0.63855	0.40819	28.5549	28.2973	28.5277	28.9359	28.5549	28.2973	28.5277	28.9359					1.8289e-173	71	33.6	10	8	19	22	9.73681	8.42372	8.46382	9.29877	9.46379	96.792
TGVEG_247550;TGME49_247550;TGGT1_247550	heat shock protein HSP60	N/A	0	0.30044	1.55256	1.67182	25.9869	26.4066	26.2874	27.9592	25.9869	26.4066	26.2874	27.9592					1.2654e-38	26	23.8	2	3	8	11	9.26219	7.63388	7.869	8.67221	9.09405	60.913
TGVEG_273760;TGGT1_273760;TGME49_273760	heat shock protein HSP70	N/A	0	-0.172281	0.345205	0.329189	30.4828	30.2945	30.3105	30.6397	30.4828	30.2945	30.3105	30.6397					9.6143e-281	129	53.2	17	11	24	21	10.242	9.15933	9.12087	9.82301	9.90151	72.292
TGVEG_288380;TGME49_288380;TGGT1_288380	heat shock protein HSP90	N/A	0	-0.35	0.2113	0.683493	29.4908	29.6129	29.1408	29.8242	29.4908	29.6129	29.1408	29.8242					4.394e-213	98	41.4	15	11	22	19	9.98001	8.83408	8.90159	9.54194	9.66158	81.932
TGVEG_324600;TGME49_232940;TGGT1_324600;TGME49_324600	heat shock protein;heat shock protein HSP20	N/A	0	4.0273	1.98176	-1.64446	26.2291	26.6302	30.2564	28.612	26.2291	26.6302	30.2564	28.612				+	1.4448e-48	49	61.1	2	3	12	8	9.88168	7.82178	8.12303	9.7474	9.26157	20.266
TGGT1_235490;TGME49_235490;TGVEG_235490	high-temperature-induced dauer-formation protein;hypothetical protein	N/A	1	5.16563	6.46716	0.651186	24.7956	24.1453	29.9613	30.6125	NaN	NaN	29.9613	30.6125	+	+	+		7.3897e-221	87	31.6	0	0	20	21	10.0685	NaN	NaN	9.6305	9.87143	102.12
TGVEG_280600;TGME49_280600;TGGT1_280600	histidyl-tRNA synthetase (HisRS), putative;putative histidyl-tRNA synthetase (HisRS)	N/A	0	0.249012	0.915718	0.953495	24.852	25.1388	25.101	26.0545	NaN	NaN	25.101	26.0545					3.2577e-20	17	5.8	1	1	4	7	8.7057	7.15458	7.45489	8.11757	8.50788	134.86
TGVEG_227020;TGME49_227020;TGGT1_227020	histone deacetylase SIR2	HMM: MNLLVISCCFLLTLACLF, NN: MNLLVISCCFLLTLAC	0	2.50164	2.08496	-0.566587	24.6529	24.503	27.1545	26.5879	NaN	NaN	27.1545	26.5879		+			1.7585e-40	13	20.6	0	0	7	3	9.03487	NaN	NaN	8.85913	8.55706	40.007
TGVEG_251870;TGME49_251870;TGGT1_251870;TGVEG_305160;TGME49_305160;TGGT1_305160	histone H2Ba;histone H2Bb	N/A	0	0.205973	-0.317764	0.311228	28.6124	29.4474	28.8184	29.1296	28.6124	29.4474	28.8184	29.1296					1.5425e-28	27	44.3	2	4	4	5	9.83523	8.08429	9.04669	9.3788	9.50728	12.575
TGVEG_239260;TGME49_239260;TGGT1_239260	histone H4	N/A	0	0.225107	-0.694061	0.0789051	29.1773	30.1753	29.4024	29.4813	29.1773	30.1753	29.4024	29.4813					5.5215e-35	26	52.4	2	4	5	4	10.007	8.58371	9.11032	9.62214	9.63355	11.439
TGGT1_261500;TGVEG_261500;TGME49_261500	hydrolase	N/A	0	7.57004	7.27113	-0.0259457	24.3436	24.6165	31.9136	31.8876	NaN	NaN	31.9136	31.8876	+	+	+		1.9472e-167	55	38.7	0	0	15	12	10.5388	NaN	NaN	10.2465	10.2289	53.149
TGGT1_232030;TGVEG_232030;TGME49_232030	hypothetical protein	N/A	0	3.31432	2.50171	-1.62827	24.2708	23.4552	27.5851	25.9569	NaN	NaN	27.5851	25.9569		+		+	2.7198e-21	9	27.9	0	0	5	2	9.06397	NaN	NaN	8.98236	8.29787	23.393
TGVEG_235340;TGGT1_235340;TGME49_235340	hypothetical protein	N/A	0	4.74764	1.45684	-2.92514	24.1017	24.4673	28.8493	25.9242	NaN	NaN	28.8493	25.9242				+	3.2124e-93	33	37.5	0	0	19	4	9.37747	NaN	NaN	9.33686	8.32813	76.643
TGVEG_235690;TGME49_235690;TGGT1_235690	hypothetical protein	N/A	0	3.44095	3.10391	-1.03789	23.805	23.1042	27.246	26.2081	NaN	NaN	27.246	26.2081		+		+	4.0443e-23	13	17.6	0	0	3	2	9.01106	NaN	NaN	8.85864	8.4824	24.978
TGVEG_243930;TGME49_243930;TGGT1_243930	hypothetical protein	HMM: MRQFLPLLVLLPLLQRQDSAA, NN: MRQFLPLLVLLPLLQRQDSAA	0	3.08239	3.17849	-0.966579	24.8276	23.7649	27.9099	26.9434	NaN	NaN	27.9099	26.9434		+		+	2.4998e-63	18	14.8	0	0	11	4	9.21859	NaN	NaN	9.09153	8.62284	101.35
TGVEG_308860;TGME49_308860;TGGT1_308860	hypothetical protein	N/A	0	0.75597	0.599897	-1.15179	24.7751	23.7794	25.5311	24.3793	NaN	NaN	25.5311	24.3793				+	1.2878e-20	8	8.9	0	0	4	2	8.48503	NaN	NaN	8.38959	7.78013	69.756
TGVEG_215220;TGGT1_215220;TGME49_215220	hypothetical protein	N/A	0	2.33351	1.13489	-1.6489	27.0027	26.5524	29.3362	27.6873	27.0027	26.5524	29.3362	27.6873				+	3.6841e-52	31	39.6	3	3	10	8	9.65363	7.90006	7.88777	9.38066	9.28894	63.201
TGVEG_203160;TGME49_203160;TGGT1_203160	hypothetical protein	N/A	0	2.08174	2.45261	0.168304	23.9572	23.7546	26.0389	26.2073	NaN	NaN	26.0389	26.2073	+	+	+		3.3178e-13	11	9.6	0	0	4	5	8.79892	NaN	NaN	8.38584	8.58688	74.801
TGVEG_209600;TGME49_209600;TGGT1_209600	hypothetical protein	N/A	0	0.678873	1.97615	-0.0752716	25.2292	23.8567	25.9081	25.8328	NaN	NaN	25.9081	25.8328					4.1807e-09	12	9.1	1	0	4	3	8.73398	7.00677	NaN	8.56749	8.21064	50.2
TGVEG_211030;TGME49_211030;TGGT1_211030	hypothetical protein	N/A	0	1.60973	1.88487	0.558415	24.0512	24.3344	25.6609	26.2193	NaN	NaN	25.6609	26.2193					5.2397e-19	10	25.1	1	0	3	4	8.77283	7.46112	NaN	8.33112	8.54336	22.215
TGME49_211630;TGGT1_211630;TGVEG_211630	hypothetical protein	N/A	0	5.24022	4.47835	-0.303618	24.4913	24.9495	29.7315	29.4279	NaN	NaN	29.7315	29.4279	+	+	+		5.8606e-185	39	66.2	0	0	13	10	9.85885	NaN	NaN	9.64551	9.44782	23.612
TGVEG_213050;TGME49_213050;TGGT1_213050	hypothetical protein	N/A	0	-0.0162926	0.786434	-0.367886	25.0578	23.8872	25.0415	24.6736	NaN	NaN	25.0415	24.6736					5.351e-10	6	13	0	1	2	2	8.43473	NaN	6.86495	8.18313	8.05046	21.263
TGVEG_214575;TGME49_214575;TGGT1_214575	hypothetical protein	N/A	0	7.50237	8.29493	-0.347672	24.1718	23.0315	31.6741	31.3265	NaN	NaN	31.6741	31.3265	+	+	+		2.8056e-53	49	58.7	0	0	5	4	10.4278	NaN	NaN	10.1912	10.0511	10.282
TGVEG_219710;TGGT1_219710;TGME49_219710	hypothetical protein	N/A	0	4.79261	3.73434	0.199072	23.7087	24.966	28.5013	28.7004	NaN	NaN	28.5013	28.7004	+	+	+		2.6661e-126	47	15.6	0	0	17	16	9.54987	NaN	NaN	9.17211	9.31404	199.78
TGVEG_228770;TGGT1_228770;TGME49_228770	hypothetical protein	HMM: MTECFLFLFRRIMGASVSTARGTQVLSAVAVATGAAAI, NN: MTECFLFLFRRIMGASVSTARGTQVLSAVAVATGAAAI	0	6.93934	5.80313	0.0204945	24.0117	25.1684	30.9511	30.9716	NaN	NaN	30.9511	30.9716		+			1.0458e-150	60	50	0	0	19	17	10.261	NaN	NaN	9.94062	9.97848	59.054
TGVEG_231410;TGME49_231410;TGGT1_231410	hypothetical protein	N/A	0	0.440782	0.8993	0.245007	24.1769	23.9634	24.6177	24.8627	NaN	NaN	24.6177	24.8627					2.5943e-07	5	9.5	0	0	3	3	8.3846	NaN	NaN	8.0735	8.09342	64.727
TGVEG_232280;TGGT1_232280;TGME49_232280	hypothetical protein	N/A	0	7.90997	7.32328	-0.18511	24.2633	24.6649	32.1733	31.9882	NaN	NaN	32.1733	31.9882	+	+	+		1.9904e-230	92	73.1	0	0	14	16	10.6052	NaN	NaN	10.3033	10.3051	30.148
TGVEG_236950;TGME49_236950;TGGT1_236950	hypothetical protein	N/A	0	3.90877	4.00076	-0.338991	23.6254	23.1944	27.5342	27.1952	NaN	NaN	27.5342	27.1952		+			4.6285e-42	12	55.4	0	0	3	2	9.28307	NaN	NaN	9.17058	8.64135	12.489
TGGT1_242570;TGVEG_242570;TGME49_242570	hypothetical protein	N/A	0	5.01098	5.7776	0.0139046	24.0623	23.3096	29.0733	29.0872	NaN	NaN	29.0733	29.0872	+	+	+		1.6123e-199	54	30.3	0	0	20	17	9.68993	NaN	NaN	9.40951	9.36726	94.837
TGGT1_249780;TGVEG_249780;TGME49_249780	hypothetical protein	N/A	0	0.912909	1.36626	0.148584	23.903	23.5982	24.8159	24.9645	NaN	NaN	24.8159	24.9645					4.8473e-26	7	16.2	1	0	3	3	8.44152	6.92266	NaN	8.06674	8.18015	35.517
TGVEG_249970;TGME49_249970;TGGT1_249970	hypothetical protein	N/A	0	4.81432	8.12722	-0.12359	27.0618	23.6253	31.8761	31.7525	27.0618	NaN	31.8761	31.7525	+	+	+		1.9148e-145	76	56.8	3	0	10	12	10.5261	8.10921	NaN	10.2602	10.1831	24.712
TGVEG_261400;TGME49_261400;TGGT1_261400	hypothetical protein	HMM: MENSARVSFSWSRAARPCLHCLGSLFLVLCFTQATLGS, NN: MENSARVSFSWSRAARPCLHCLGSLFLVLCFTQATLGS	0	2.954	2.01101	-0.813482	24.6671	24.7966	27.6211	26.8076	NaN	NaN	27.6211	26.8076		+			5.1851e-21	13	10.8	0	0	5	5	9.14681	NaN	NaN	8.9664	8.6782	50.421
TGVEG_264990;TGME49_264990;TGGT1_264990	hypothetical protein	N/A	0	4.46616	5.33605	0.190428	24.2242	23.5447	28.6903	28.8808	NaN	NaN	28.6903	28.8808	+	+	+		2.003e-38	30	43.2	0	0	10	8	9.60248	NaN	NaN	9.34512	9.2529	29.069
TGVEG_269950;TGGT1_269950;TGME49_269950	hypothetical protein	HMM: MIGLFSSHFLRRHKMAGRASVVVSLLFSASLWSLLSRVDGA, NN: MIGLFSSHFLRRHKMAGRASVVVSLLFSASLWSLLSRVDGA	0	2.1901	3.87563	0.625486	24.4438	23.3838	26.6339	27.2594	NaN	NaN	26.6339	27.2594		+			2.5967e-64	29	18.3	2	2	9	10	9.07332	7.4839	7.13824	8.69558	8.8086	104.62
TGGT1_269990;TGVEG_269990;TGME49_269990	hypothetical protein	N/A	0	2.19996	2.53955	0.388124	24.349	24.3975	26.549	26.9371	NaN	NaN	26.549	26.9371	+	+	+		2.9616e-49	16	6.3	0	0	5	9	8.98784	NaN	NaN	8.47819	8.82714	216.02
TGVEG_275650;TGME49_275650;TGGT1_275650	hypothetical protein	N/A	0	2.84812	2.44815	0.296351	23.7652	24.4615	26.6133	26.9097	NaN	NaN	26.6133	26.9097		+			2.4526e-55	21	18.7	3	1	7	9	9.06367	7.87019	7.96603	8.62903	8.74719	101.21
TGVEG_277870;TGME49_277870;TGGT1_277870	hypothetical protein	N/A	0	2.06721	4.7673	0.536724	25.1118	22.9485	27.179	27.7157	NaN	NaN	27.179	27.7157	+	+	+		2.6059e-96	17	27.1	0	0	8	7	9.20472	NaN	NaN	8.83095	8.96597	57.918
TGVEG_289615;TGGT1_289615;TGME49_289615	hypothetical protein	N/A	0	1.05201	1.54225	-0.322676	25.0277	24.2148	26.0798	25.7571	NaN	NaN	26.0798	25.7571	+				2.6139e-53	7	29	0	0	3	2	8.74178	NaN	NaN	8.5259	8.33474	23.085
TGVEG_294790;TGME49_294790;TGGT1_294790	hypothetical protein	N/A	0	4.51811	4.1308	-0.674988	24.1923	23.9046	28.7104	28.0354	NaN	NaN	28.7104	28.0354		+			6.5539e-90	20	22.8	0	0	6	5	9.49436	NaN	NaN	9.2694	9.10106	37.699
TGVEG_310420;TGME49_310420;TGGT1_310420	hypothetical protein	N/A	0	5.58529	5.5539	-0.202726	24.7647	24.5933	30.35	30.1472	NaN	NaN	30.35	30.1472	+	+	+		3.0616e-19	16	23.8	0	0	1	3	10.0429	NaN	NaN	9.77776	9.70278	22.925
TGGT1_310930;TGVEG_310930;TGME49_310930	hypothetical protein	N/A	0	1.50992	1.53461	0.41819	24.3845	24.778	25.8944	26.3126	NaN	NaN	25.8944	26.3126	+				9.2857e-57	12	7.9	0	0	6	5	8.79769	NaN	NaN	8.46295	8.52795	87.519
TGVEG_313380;TGME49_313380;TGGT1_313380	hypothetical protein	N/A	0	8.76468	9.82875	-0.0978355	25.0922	23.9303	33.8568	33.759	25.0922	NaN	33.8568	33.759	+	+	+		0	200	84.7	3	1	22	20	11.1305	8.07335	7.53405	10.8437	10.8136	31.512
TGVEG_319510;TGME49_319510;TGGT1_319510	hypothetical protein	N/A	0	5.08867	6.08021	-0.267351	25.0337	23.7748	30.1224	29.855	NaN	NaN	30.1224	29.855	+	+	+		1.3106e-92	42	52.5	0	0	9	8	9.97895	NaN	NaN	9.74875	9.59325	29.924
TGVEG_320760;TGME49_320760;TGGT1_320760	hypothetical protein	N/A	0	5.01801	6.22107	-0.136614	24.8998	23.5602	29.9178	29.7812	NaN	NaN	29.9178	29.7812	+	+	+		4.39e-109	40	42.6	0	0	14	12	9.92401	NaN	NaN	9.67944	9.55806	39.389
TGVEG_442370	hypothetical protein	HMM: GFVFASTAASTIAASTIAAS, NN: GFVFASTAASTIAASTIAA	0	0.637154	0.435688	-0.332117	26.2463	26.1156	26.8834	26.5513	26.2463	26.1156	26.8834	26.5513					1.3533e-22	16	13.1	2	2	2	2	9.05534	7.90043	7.98112	8.73065	8.62619	33.656
TGVEG_293470;TGME49_293470;TGGT1_293470	hypothetical protein;immune mapped protein 1	N/A	0	6.77292	6.98119	-0.0210953	24.5614	24.332	31.3343	31.3132	NaN	NaN	31.3343	31.3132	+	+	+		2.1662e-174	80	62	0	0	19	20	10.3688	NaN	NaN	10.0729	10.0625	43.492
TGVEG_297070;TGME49_297070;TGGT1_297070	hypothetical protein;putative duplicated carbonic anhydrase	HMM: MTDCPFAAIRGSSGRISRSHVAFLVILAVAVTSNPTLAF, NN: MTDCPFAAIRGSSGRISRSHVAFLVILAVAVTSNPTLAF;HMM: MTDCPFAAIRGSSGRISRSHVAFLVILAVSVTSNPTLAF, NN: MTDCPFAAIRGSSGRISRSHVAFLVILAVSVTSNPTLAF	0;1	6.40665	5.9796	-0.592115	24.3056	24.1406	30.7123	30.1202	NaN	NaN	30.7123	30.1202		+			1.1199e-271	40	31.4	0	0	10	9	10.1066	NaN	NaN	9.92577	9.63892	58.102
TGVEG_319340;TGME49_319340;TGGT1_319340	hypothetical protein;putative kelch motif protein	HMM: MACDRLAAMLPSQRRGLCCRGRNALLFFALFCFAVCLLGH, NN: MACDRLAAMLPSQRRGLCCRGRNALLFFALFCFAVCLLGH	1	0.653868	2.50564	-0.46805	27.2552	24.9354	27.9091	27.441	27.2552	NaN	27.9091	27.441					5.2394e-76	25	21	5	1	7	5	9.35261	8.01313	7.38927	9.14993	8.85268	52.432
TGGT1_286580;TGVEG_286580;TGME49_286580	hypothetical protein;putative lysophospholipase	N/A	0	4.01586	2.55915	-1.92423	24.6004	24.1329	28.6163	26.6921	NaN	NaN	28.6163	26.6921		+		+	2.4578e-87	33	26.1	0	0	21	5	9.35467	NaN	NaN	9.2919	8.48362	107.22
TGVEG_205330;TGME49_205330;TGGT1_205330	hypothetical protein;putative transmembrane protein	N/A	8	3.15922	1.49026	-1.87391	23.9293	23.7243	27.0885	25.2146	NaN	NaN	27.0885	25.2146	+			+	4.4373e-16	8	12.1	0	0	4	2	8.89771	NaN	NaN	8.82345	8.09405	35.281
TGVEG_215980;TGME49_215980;TGGT1_215980	hypothetical protein;putative transmembrane protein	N/A	1	0.775989	0.408817	-1.22706	27.822	26.9621	28.598	27.3709	27.822	26.9621	28.598	27.3709				+	3.599e-14	23	18.1	3	2	4	2	9.48237	8.38466	8.20785	9.27609	8.87173	24.466
TGVEG_216180;TGME49_216180;TGGT1_216180	hypothetical protein;putative transmembrane protein	HMM: MITVILCSVLFYSLGLVAPTSAA, NN: MITVILCSVLFYSLGLVAPTSAA	3	2.98686	1.5333	-0.979006	24.3472	24.8218	27.3341	26.3551	NaN	NaN	27.3341	26.3551				+	5.881e-11	11	21.8	0	1	3	3	9.05104	NaN	6.82451	8.86545	8.58485	16.441
TGVEG_255410;TGME49_255410;TGGT1_255410	hypothetical protein;putative transmembrane protein	HMM: MSTLTANGAGAACATPVESA, NN: MSTLTANGAGAACATPVESA	2	3.57292	2.62584	-1.19781	24.1465	23.8958	27.7194	26.5216	NaN	NaN	27.7194	26.5216		+		+	4.1032e-12	5	10.3	0	0	1	1	9.13846	NaN	NaN	8.98887	8.60294	17.53
TGVEG_301130;TGME49_301130;TGGT1_301130	hypothetical protein;putative transmembrane protein	HMM: MPCCATCCLLLSGFAIVFLLVFGA, NN: MPCCATCCLLLSGFAIVFLLVFGALMAN	2	3.90153	3.23305	-1.257	23.8393	23.2507	27.7408	26.4838	NaN	NaN	27.7408	26.4838		+		+	4.0333e-39	10	40.9	0	0	3	2	9.13972	NaN	NaN	8.99884	8.58228	13.507
TGGT1_312150;TGVEG_312150;TGME49_312150	hypothetical protein;putative transmembrane protein	N/A	1	3.02921	1.76426	-0.950594	24.1795	24.4939	27.2087	26.2581	NaN	NaN	27.2087	26.2581				+	1.8253e-33	12	19.4	1	0	6	4	9.00941	NaN	NaN	8.89584	8.37125	60.669
TGVEG_218240;TGME49_218240;TGGT1_218240	hypothetical protein;putative transmembrane protein	HMM: MRPAFSGTSQGAGTRALWRWGRRSSFVSLCAASFLGVILLGSAQESLSA, NN: MRPAFSGTSQGAGTRALWRWGRRSSFVSLCAASFLGVILLGSAQESLSA	1	1.67948	1.67443	0.157743	24.325	24.4878	26.0045	26.1622	NaN	NaN	26.0045	26.1622					1.8184e-23	8	6.7	0	0	5	4	8.78863	NaN	NaN	8.52308	8.44897	132.28
TGVEG_231100;TGME49_231100;TGGT1_231100	hypothetical protein;putative transmembrane protein	N/A	1	2.48054	1.31753	-0.494589	24.6465	25.3149	27.127	26.6324	NaN	NaN	27.127	26.6324					8.0681e-22	10	17.9	0	0	7	4	9.03543	NaN	NaN	8.85874	8.55955	53.823
TGVEG_237880;TGME49_237880;TGGT1_237880	hypothetical protein;putative transmembrane protein	HMM: MLHHSVCFCSARGFIPAMRKFTIVAVVVFALLGCVSWQESAFVRGA, NN: MLHHSVCFCSARGFIPAMRKFTIVAVVVFALLGCVSWQ;HMM: MLHHSVCFCSARGFIPAVRKFTIVAVVVFALLGCVSWQESAFVRGA, NN: MLHHSVCFCSARGFIPAVRKFTIVAVVVFALLGCVSWQ	1	1.0049	0.488937	0.144201	24.317	24.9772	25.3219	25.4661	NaN	NaN	25.3219	25.4661					2.221e-11	8	17.1	1	1	2	2	8.61496	7.1941	7.2032	8.26138	8.29647	18.139
TGVEG_238150;TGME49_238150;TGGT1_238150	hypothetical protein;putative transmembrane protein	N/A	8	3.53964	2.95835	-0.372015	23.3581	23.5673	26.8977	26.5257	NaN	NaN	26.8977	26.5257	+	+	+		3.6539e-21	9	13.8	0	0	4	3	8.98141	NaN	NaN	8.7623	8.57933	37.062
TGVEG_243690;TGME49_243690;TGGT1_243690	hypothetical protein;putative transmembrane protein	N/A	1	1.83942	1.35168	-0.690081	23.9562	23.7539	25.7957	25.1056	NaN	NaN	25.7957	25.1056					1.4398e-08	5	8.5	0	0	3	2	8.61178	NaN	NaN	8.46713	8.06401	44.598
TGVEG_246580;TGME49_246580;TGGT1_246580	hypothetical protein;putative transmembrane protein	HMM: MGECAILAICLVVFFAVLMSF, NN: MGECAILAICLVVFFAVLMSFDYRDGI	1	2.42769	3.23861	-0.560402	24.6615	23.2902	27.0892	26.5288	NaN	NaN	27.0892	26.5288	+	+	+		1.2326e-47	12	26.1	0	0	7	3	9.01674	NaN	NaN	8.88359	8.43845	42.82
TGVEG_271270;TGGT1_271270;TGME49_271270	hypothetical protein;putative transmembrane protein	N/A	1	1.70382	0.792746	0.329185	23.4858	24.726	25.1896	25.5188	NaN	NaN	25.1896	25.5188	+				6.5318e-20	8	8.3	0	0	4	4	8.57097	NaN	NaN	8.28196	8.25758	93.148
TGVEG_293430;TGME49_293430;TGGT1_293430	hypothetical protein;putative transmembrane protein	N/A	4	6.73213	6.98725	-0.230408	23.68	23.1945	30.4122	30.1817	NaN	NaN	30.4122	30.1817		+			1.7405e-142	66	48.4	0	0	16	14	10.0638	NaN	NaN	9.78508	9.73918	44.583
TGVEG_293440;TGME49_293440;TGGT1_293440	hypothetical protein;putative transmembrane protein	N/A	4	4.97872	5.72995	0.161711	25.2321	24.6426	30.2108	30.3725	NaN	NaN	30.2108	30.3725		+			2.9586e-177	60	44.4	0	0	18	16	10.0599	NaN	NaN	9.72913	9.78664	58.737
TGGT1_313080;TGVEG_313080;TGME49_313080	hypothetical protein;putative transmembrane protein	HMM: MAASVPRLPPLFLSTALLLCLAA, NN: MAASVPRLPPLFLSTALLLCLAA	1	7.22308	6.73825	-0.578043	24.1744	24.0812	31.3974	30.8194	NaN	NaN	31.3974	30.8194		+			3.2778e-167	65	48.1	1	0	22	14	10.3126	7.30289	NaN	10.0951	9.90712	49.526
TGGT1_410360	hypothetical protein;putative transmembrane protein	HMM: MWRIWRCRLSFLFATGCLLGALTAGLGS, NN: MWRIWRCRLSFLFATGCLLGALTA;N/A	0;1;2	0.429365	0.325983	-0.0300827	27.2962	27.3695	27.7256	27.6955	27.2962	27.3695	27.7256	27.6955					1.6574e-48	18	19.5	2	2	3	4	9.40656	8.09635	8.23434	9.03711	9.0661	38.079
TGGT1_308020;TGVEG_308020	hypothetical protein;SAG-related sequence SRS57	HMM: MQLWRRRAAGPASLGRQSLPLGCFFAAFGLCVLSAILGT, NN: MQLWRRRAAGPASLGRQSLPLGCFFAAFGLCVLSA	1	7.24282	5.61924	-1.86971	24.8392	24.5931	32.0821	30.2123	24.8392	NaN	32.0821	30.2123		+		+	1.603e-161	56	53.2	3	1	14	8	10.4067	7.38721	7.45108	10.3008	9.73767	41.773
TGVEG_258826;TGME49_258826;TGGT1_258826	hypothetical protein;thioredoxin domain protein	HMM: MWRSSPLPRSFPRLLLALASLCCLYLP, NN: MWRSSPLPRSFPRLLLALASLCCLYLP;HMM: MWRSSPLPRSFPRLLLALASLCCLYLPPPPVYVHPC, NN: MWRSSPLPRSFPRLLLALASLCCLYLP	1	0.71645	0.763695	-0.972626	23.8381	22.8182	24.5545	23.5819	NaN	NaN	24.5545	23.5819				+	6.1023e-14	6	4.2	0	0	4	2	8.20847	NaN	NaN	8.11012	7.5152	111.84
TGVEG_260820;TGME49_260820;TGGT1_260820	IMC sub-compartment protein ISP1	N/A	0	7.50727	8.58606	-0.12915	25.2524	24.0445	32.7597	32.6305	NaN	NaN	32.7597	32.6305	+	+	+		4.4866e-197	70	55.1	0	0	11	11	10.7849	NaN	NaN	10.5037	10.4631	19.413
TGVEG_237820;TGME49_237820;TGGT1_237820	IMC sub-compartment protein ISP2	N/A	0	7.23491	7.07359	-0.618136	24.6136	24.1568	31.8486	31.2304	NaN	NaN	31.8486	31.2304	+	+	+		1.1132e-192	55	58.1	0	0	9	7	10.4436	NaN	NaN	10.248	10.003	17.397
TGVEG_316540;TGME49_316540;TGGT1_316540	IMC sub-compartment protein ISP3	N/A	0	7.37717	9.35113	0.142536	25.2782	23.4468	32.6554	32.798	NaN	NaN	32.6554	32.798	+	+	+		3.4067e-75	97	58.5	0	0	9	8	10.8136	NaN	NaN	10.5158	10.5093	18.39
TGVEG_239100;TGME49_239100;TGGT1_239100	Ku70/Ku80 beta-barrel domain-containing protein;ribosomal protein RPS7	HMM: MALPGQSFKRVIVLLLDCGATMQQ, NN: MALPGQSFKRVIVLLLDCGATMQQ;N/A	0	2.18411	0.513815	-0.127516	25.4863	27.0291	27.6704	27.5429	NaN	27.0291	27.6704	27.5429					7.1545e-34	29	49	2	4	8	6	9.31427	7.59381	8.17681	9.04964	8.87581	22.587
TGVEG_232350;TGME49_232350;TGGT1_232350	lactate dehydrogenase LDH1	N/A	0	0.212051	0.705259	0.48839	29.2715	29.2667	29.4836	29.972	29.2715	29.2667	29.4836	29.972					1.6021e-215	70	58.1	7	7	12	13	10.0071	8.7177	8.84936	9.5645	9.71976	35.548
TGVEG_271810;TGME49_271810;TGGT1_271810	lanp, putative;putative lanp	N/A	0	3.43672	1.52468	-1.54233	23.6565	24.0263	27.0933	25.5509	NaN	NaN	27.0933	25.5509				+	4.7356e-21	10	29.7	0	0	7	2	8.9221	NaN	NaN	8.82719	8.21508	31.931
TGVEG_290670;TGGT1_290670;TGME49_290670	leucyl aminopeptidase LAP	HMM: MVPPSPGASCLLSRTRQRNVLPLACSLCLYTVTVCSAL, NN: MVPPSPGASCLLSRTRQRNVLPLACSLCLYTVTVCSAL;HMM: MVPPTPGASCLLSRTRQRNVLPLACSLCLYTVTVCSAL, NN: MVPPTPGASCLLSRTRQRNVLPLACSLCLYTVTVCSAL	0	0.575989	0.837061	0.41674	27.1236	27.2792	27.6996	28.1163	27.1236	27.2792	27.6996	28.1163					5.6264e-62	41	24.7	6	6	12	12	9.45532	7.99109	8.18221	9.03234	9.18347	83.189
TGME49_292080;TGVEG_292080;TGGT1_292080	leucyl-tRNA synthetase	N/A	0	-0.162502	0.790667	0.901857	23.7596	23.7083	23.5971	24.4989	NaN	NaN	23.5971	24.4989					2.304e-08	4	1.7	0	0	2	2	8.19399	NaN	NaN	7.73807	8.00689	141.14
TGGT1_243800;TGVEG_243800;TGME49_243800	long-chain fatty acid CoA ligase, putative;putative long-chain fatty acid CoA ligase	N/A	0	9.0939	7.69207	0.221092	23.9822	25.6051	33.0761	33.2972	NaN	NaN	33.0761	33.2972	+	+	+		0	248	60.3	1	0	38	38	10.9493	6.97489	NaN	10.6035	10.6888	83.507
TGVEG_236570;TGME49_236570;TGGT1_236570	lysine decarboxylase family protein	N/A	0	0.0307255	0.0323067	-0.665093	25.2247	24.558	25.2554	24.5903	NaN	NaN	25.2554	24.5903					1.2485e-22	9	18.4	1	0	4	3	8.46413	6.95078	NaN	8.22027	8.06509	43.97
TGVEG_290040;TGME49_290040;TGGT1_290040	macrophage migration inhibitory factor, putative;putative macrophage migration inhibitory factor	HMM: MPKCMIFCPVAATPAQQD, NN: MPKCMIFCPVAAT	0	0.848629	2.16013	0.182232	24.6083	23.479	25.4569	25.6392	NaN	NaN	25.4569	25.6392					1.1319e-16	6	40.5	0	0	4	3	8.62805	NaN	NaN	8.38678	8.2577	12.254
TGVEG_270240;TGME49_270240;TGGT1_270240	MAG1;MAG1 protein	HMM: MDCGQCRRQLHAAGVLGLFVTLATATVGLSQ, NN: MDCGQCRRQLHAAGVLGLFVTLATAT	1	1.70908	2.53497	0.711882	25.1221	25.0081	26.8312	27.5431	25.1221	NaN	26.8312	27.5431					3.5007e-40	24	23.2	2	1	9	9	9.15543	7.505	7.40976	8.72986	8.9221	49.195
TGVEG_318430;TGME49_318430;TGGT1_318430	malate dehydrogenase MDH	N/A	0	1.02765	1.61121	0.106237	24.7569	24.2796	25.7846	25.8908	NaN	NaN	25.7846	25.8908					6.6699e-12	7	15.7	0	0	5	3	8.71455	NaN	NaN	8.46459	8.35562	54.703
TGGT1_292120;TGVEG_292120;TGME49_292120	membrane occupation and recognition nexus protein MORN2	N/A	0	6.62081	7.64127	-0.123476	24.056	22.9121	30.6768	30.5534	NaN	NaN	30.6768	30.5534	+	+	+		4.4969e-239	64	71.6	0	0	22	18	10.1527	NaN	NaN	9.90098	9.79616	49.281
TGVEG_261780;TGME49_261780;TGGT1_261780	microneme protein MIC7	N/A	1	7.06448	6.8101	-0.8021	24.4923	23.9446	31.5568	30.7547	NaN	NaN	31.5568	30.7547	+	+	+		2.3897e-299	53	55	0	0	13	10	10.314	NaN	NaN	10.1569	9.7963	36.34
TGGT1_207830;TGVEG_207830;TGME49_207830	MORN repeat-containing protein	N/A	0	6.51792	6.37093	-0.184921	23.7385	23.7006	30.2564	30.0715	NaN	NaN	30.2564	30.0715	+	+	+		1.5507e-145	66	65.8	0	0	18	17	10.0352	NaN	NaN	9.80231	9.6533	39.833
TGVEG_297150;TGME49_297150;TGGT1_297150	MORN repeat-containing protein	N/A	0	2.16873	2.32805	-0.109768	24.4876	24.2185	26.6563	26.5466	NaN	NaN	26.6563	26.5466	+	+	+		3.1946e-21	14	17.2	0	0	6	6	8.94339	NaN	NaN	8.61087	8.67171	50.295
TGGT1_313290;TGVEG_313290;TGME49_313290	MORN repeat-containing protein	N/A	0	7.54299	6.40669	-0.301386	23.493	24.328	31.036	30.7346	NaN	NaN	31.036	30.7346	+	+	+		5.9747e-261	93	62.2	0	0	22	20	10.2405	NaN	NaN	10.0184	9.84303	46.04
TGGT1_235470;TGVEG_235470;TGME49_235470	myosin A	N/A	0	0.156876	0.678091	0.211752	28.4019	28.0924	28.5587	28.7705	28.4019	28.0924	28.5587	28.7705					7.959e-91	75	31	9	7	20	19	9.69518	8.42539	8.42446	9.33881	9.35077	93.333
TGVEG_257680;TGME49_257680;TGGT1_257680	myosin light chain MLC1	N/A	0	4.00598	3.04701	-1.2517	26.046	25.7532	30.0519	28.8002	26.046	25.7532	30.0519	28.8002		+		+	1.2671e-35	36	45.1	2	2	7	4	9.86401	7.59951	7.83418	9.7128	9.30999	24.124
TGVEG_290200;TGME49_290200;TGGT1_290200	NAD/NADP octopine/nopaline dehydrogenase, alpha-helical domain-containing protein	HMM: MGAPSPVAAGVAARTKSPLLTVCVCGGGNSAHAVAA, NN: MGAPSPVAAGVAARTKSPLLTV	0	3.70152	2.57454	0.203312	23.6978	25.0281	27.3993	27.6026	NaN	NaN	27.3993	27.6026	+	+	+		3.2042e-30	16	29.2	1	0	6	9	9.21511	6.91876	NaN	8.66807	9.06711	48.099
TGVEG_309560;TGME49_309560;TGGT1_309560	nmda receptor glutamate-binding chain	N/A	7	4.79468	2.22073	-1.35776	23.9727	25.1888	28.7673	27.4096	NaN	NaN	28.7673	27.4096		+		+	1.0282e-19	11	14.7	0	0	3	3	9.44663	NaN	NaN	9.32781	8.82569	29.321
TGGT1_277270	NTPase II	N/A	0	-0.171909	0.289734	-0.213001	31.1009	30.4262	30.929	30.716	31.1009	30.4262	30.929	30.716					1.6631e-213	130	54.3	18	14	25	21	10.2972	9.21869	9.51159	9.91697	9.82355	95.782
TGVEG_295350;TGME49_295350;TGGT1_295350	nucleoside diphosphate kinase, putative;putative nucleoside diphosphate kinase	N/A	0	2.28981	4.09722	-0.471092	26.8484	24.5699	29.1382	28.6671	26.8484	NaN	29.1382	28.6671		+			5.1103e-78	26	47.7	2	1	6	5	9.67835	7.91305	7.65442	9.44411	9.2697	17.639
TGVEG_360830	nucleoside-triphosphatase	N/A	0	-0.742433	1.65561	-0.0692024	27.5757	25.1085	26.8333	26.7641	27.5757	NaN	26.8333	26.7641					1.2315e-208	16	65.9	4	0	4	4	9.12992	8.22303	NaN	8.82467	8.71074	40.505
TGGT1_309265;TGVEG_309265;TGME49_309265	oxidoreductase, short chain dehydrogenase/reductase family protein	N/A	1;2	5.5551	8.12583	0.660816	24.489	22.5791	30.0441	30.705	NaN	NaN	30.0441	30.705		+			1.056e-183	73	27	0	0	17	19	10.0918	NaN	NaN	9.68318	9.87701	99.225
TGVEG_217820;TGME49_217820;TGGT1_217820	PCI domain-containing protein	N/A	0	0.905525	1.37466	-0.317032	24.9401	24.154	25.8457	25.5286	NaN	NaN	25.8457	25.5286					1.3093e-12	8	8.4	0	0	4	3	8.67218	NaN	NaN	8.46359	8.25356	51.722
TGVEG_273520;TGME49_273520;TGGT1_273520	PCI domain-containing protein	N/A	0	2.40879	3.72355	0.523289	24.6499	23.8584	27.0587	27.582	NaN	NaN	27.0587	27.582		+			1.7927e-57	16	14.6	1	1	6	6	9.17479	6.7397	7.21566	8.96322	8.7441	67.341
TGVEG_289650;TGME49_289650;TGGT1_289650	PEP-carboxykinase I	N/A	0	1.53052	0.232163	0.166676	24.0528	25.5178	25.5833	25.75	NaN	25.5178	25.5833	25.75					1.5376e-22	12	9.5	1	2	4	4	8.75056	7.235	7.7281	8.27448	8.48327	75.342
TGVEG_236210A;TGME49_236210;TGGT1_236210	peptidase M16 family potein, putative;putative peptidase M16 family potein	HMM: MMFRFLPRVASGASSLSVSQRRLRASFSSSLQSRGFFSAAPAAATAGVSPLARSVDAA, NN: MMFRFLPRVASGA	0	0.114222	1.35618	0.654821	24.0906	23.5034	24.2048	24.8596	NaN	NaN	24.2048	24.8596					6.3572e-17	7	11.5	1	1	2	3	8.4062	7.23787	7.37125	7.92205	8.11538	36.06
TGVEG_202680;TGME49_202680;TGGT1_202680	peptidase M16, alpha subunit, putative;putative peptidase M16, alpha subunit	HMM: MNASILFRRNAPGVSTCLRRRCLRPAALAAASASGVSTPASGV, NN: MNASILFRRNAPGVSTCLRRRCLRPAALA	0	1.14061	2.11905	0.828266	24.5688	24.4186	25.7094	26.5377	NaN	NaN	25.7094	26.5377					1.4915e-17	11	11.5	1	1	3	4	8.82598	6.79818	7.05127	8.21378	8.68905	62.161
TGVEG_283850;TGME49_283850;TGGT1_283850	peptidyl-prolyl cis-trans isomerase	N/A	0	-0.00368118	1.94452	0.807461	25.2962	24.1555	25.2925	26.1	25.2962	NaN	25.2925	26.1	+				2.1775e-20	11	14.1	2	0	5	5	8.76749	7.37098	NaN	8.38464	8.50447	55.575
TGVEG_309210;TGME49_309210;TGGT1_309210	peroxiredoxin 6, putative;putative peroxiredoxin 6	N/A	0	0.71805	0.720869	0.166801	26.3818	26.5458	27.0999	27.2667	26.3818	26.5458	27.0999	27.2667					1.9286e-19	19	14.9	2	3	6	6	9.24002	7.72335	7.9512	8.88075	8.92208	44.035
TGVEG_255910;TGME49_255910;TGGT1_255910	PfMNL-2 CISD1 family iron-sulfur protein, putative;putative PfMNL-2 CISD1 family iron-sulfur protein	HMM: MDELLQMLVVFLRAR, NN: MDELLQMLVVFLRARVPSTFRAR;HMM: MHDLLQMLVVFLRAR, NN: MHDLLQMLVVFLRARVPSTFRAR	0	3.82605	3.35655	-0.302229	24.358	24.5253	28.1841	27.8819	NaN	NaN	28.1841	27.8819		+			1.9704e-20	18	23.4	0	0	5	4	9.37816	NaN	NaN	9.17351	8.95309	24.955
TGVEG_278990;TGME49_278990;TGGT1_278990	phosphate carrier, putative;putative phosphate carrier	N/A	1	0.606157	3.40048	-0.592381	27.2486	23.8619	27.8548	27.2624	27.2486	NaN	27.8548	27.2624					6.8599e-50	22	21.3	2	2	7	6	9.34951	7.85514	7.65194	9.06397	8.98273	53.093
TGVEG_245710;TGME49_245710;TGGT1_245710	phosphatidylinositol-4-phosphate 5-kinase, putative;putative phosphatidylinositol-4-phosphate 5-kinase	N/A	0	5.0055	6.13193	0.0573006	24.1772	23.1081	29.1827	29.24	NaN	NaN	29.1827	29.24	+	+	+		2.2021e-67	34	37.4	0	0	11	10	9.72942	NaN	NaN	9.44501	9.41111	31.258
TGVEG_226960;TGME49_226960;TGGT1_226960	phosphofructokinase PFKII	N/A	0	-0.0484066	0.643551	0.795225	27.5016	27.6048	27.4532	28.2484	27.5016	27.6048	27.4532	28.2484					5.3947e-83	46	14.4	9	5	10	11	9.47114	8.16578	8.29464	8.95405	9.23447	131.36
TGME49_318230;TGGT1_318230;TGVEG_318230	phosphoglycerate kinase PGKI	N/A	0	0.319185	1.61619	0.406515	27.7204	26.8299	28.0396	28.4461	27.7204	26.8299	28.0396	28.4461					2.2118e-141	55	54.7	8	4	12	14	9.54265	8.29345	7.99238	9.15987	9.24274	44.676
TGVEG_222020;TGME49_222020;TGGT1_222020	phosphoglycerate kinase PGKII	N/A	0	0.968134	1.23382	-0.197926	24.6212	24.1576	25.5893	25.3914	NaN	NaN	25.5893	25.3914					1.3321e-13	7	9.1	0	0	4	3	8.61103	NaN	NaN	8.38149	8.22438	63.05
TGVEG_297060;TGME49_297060;TGGT1_297060	phosphoglycerate mutase PGMII	N/A	0	2.55575	1.95423	0.237604	23.7921	24.6313	26.3479	26.5855	NaN	NaN	26.3479	26.5855	+				2.3664e-26	12	23.3	2	1	4	5	8.98573	7.70677	8.06733	8.49119	8.69031	38.159
TGGT1_247690;TGVEG_247690;TGME49_247690	phospholipid-translocating P-type ATPase, flippase subfamily protein	N/A	8	0.823954	2.09062	1.24842	23.9565	23.9383	24.7805	26.0289	NaN	NaN	24.7805	26.0289	+				2.8253e-51	8	3.8	0	0	3	6	8.62016	NaN	NaN	8.06703	8.47761	204.95
TGVEG_310640;TGME49_310640;TGGT1_310640	phosphorylase family protein	N/A	0	2.24719	1.88202	-0.0559025	24.3127	24.6219	26.5599	26.504	NaN	NaN	26.5599	26.504					9.4111e-36	17	39.6	1	2	8	7	8.97122	7.36059	7.87995	8.63458	8.60853	33.043
TGME49_218780;TGGT1_218780;TGVEG_218780	phosphoserine aminotransferase, putative;putative phosphoserine aminotransferase	N/A	0	-0.498198	1.4441	0.423748	24.8538	23.3353	24.3556	24.7794	NaN	NaN	24.3556	24.7794					4.6696e-37	7	11.2	0	0	4	2	8.33686	NaN	NaN	8.10748	7.94998	52.754
TGME49_280380;TGGT1_280380;TGVEG_280380	poly(ADP-ribose) glycohydrolase	HMM: MECHVVRLLVSLLILVPCVCMAQ, NN: MECHVVRLLVSLLILVPCVCMAQ	1	0.0361271	3.05683	-0.153692	26.6281	23.4537	26.6642	26.5105	26.6281	NaN	26.6642	26.5105					6.181e-30	18	18.3	3	0	5	7	9.0304	7.86324	NaN	8.63774	8.75222	61.836
TGGT1_281580;TGVEG_281580;TGME49_281580	PP2C, putative;putative PP2C	N/A	0	4.17379	3.10722	0.138824	23.2052	24.4106	27.379	27.5178	NaN	NaN	27.379	27.5178	+	+	+		5.8772e-63	22	25.9	0	0	11	10	9.19871	NaN	NaN	8.8804	8.91428	71.856
TGVEG_269980;TGME49_269980;TGGT1_269980	preprotein translocase Sec61, putative;putative preprotein translocase Sec61	HMM: MAKGFRFLNLIKPVMCILPEVQAP, NN: MAKGFRFLNLIKPVMCI	8	1.98508	2.0876	5.53131e-05	25.9503	25.8479	27.9354	27.9354	25.9503	25.8479	27.9354	27.9354					1.1245e-40	22	14	2	1	7	7	9.38842	7.71534	7.77249	9.04755	9.08597	52.164
TGVEG_243950;TGME49_243950;TGGT1_243950	prohibitin, putative;putative prohibitin	HMM: MAERLLTTIGRAGVLLGSAGFVASSCLY, NN: MAERLLTTIGRAGVLLGSAGFVASS	0	0.815782	1.78437	0.347305	24.1976	23.5763	25.0134	25.3607	NaN	NaN	25.0134	25.3607					1.2673e-10	6	16.6	0	0	3	3	8.52048	NaN	NaN	8.19315	8.24425	30.221
TGVEG_279390;TGME49_279390;TGGT1_279390	proliferation-associated protein 2G4, putative;putative proliferation-associated protein 2G4	N/A	0	1.93856	1.96799	0.499399	25.8322	26.3022	27.7708	28.2702	25.8322	26.3022	27.7708	28.2702					6.7274e-31	26	19.7	3	3	9	10	9.42623	7.70491	7.84484	9.06502	9.14183	50.292
TGVEG_219850;TGME49_219850;TGGT1_219850	prolyl-tRNA synthetase (ProRS)	HMM: MRPGVFSRGFCRPGTLFSPFSLLFSSLWWTLWTRPSTTLAF, NN: MRPGVFSRGFCRPGTLFSPFSLLFSSLWWTLWTR	0	0.850401	3.59996	1.03066	25.6789	23.9599	26.5292	27.5599	25.6789	NaN	26.5292	27.5599					1.0732e-71	26	18.3	3	0	8	11	9.14136	7.52612	NaN	8.6734	8.94434	93.444
TGME49_313410;TGGT1_313410;TGVEG_313410A	proteasome 26S regulatory subunit	HMM: VDSSLPVECSAFAAVSLGLVFVGSCNQE, NN: VDSSLPVECSAFAAVSLGLVFVGSCNQEAAEAI;N/A	0	2.72027	1.84826	1.06019	23.1243	25.0565	25.8445	26.9047	NaN	NaN	25.8445	26.9047					5.1226e-53	18	17	0	0	7	11	8.90087	NaN	NaN	8.27066	8.78493	117.71
TGVEG_249590;TGME49_249590;TGGT1_249590	proteasome subunit alpha type 5-2, putative;putative proteasome subunit alpha type 5-2	N/A	0	0.711395	-0.164547	0.24296	23.7929	24.9118	24.5043	24.7473	NaN	NaN	24.5043	24.7473					4.5218e-13	6	12.8	1	1	2	2	8.40975	7.08393	7.32141	8.01561	8.07965	28.279
TGVEG_239500;TGME49_239500;TGGT1_239500	proteasome subunit alpha type, putative;putative proteasome subunit alpha type	N/A	0	1.16173	1.21069	0.191912	23.7258	23.8688	24.8875	25.0794	NaN	NaN	24.8875	25.0794					3.0428e-11	4	11.1	0	0	2	2	8.45709	NaN	NaN	8.13446	8.17664	27.936
TGVEG_242290;TGME49_242290;TGGT1_242290	proteasome subunit alpha1, putative;putative proteasome subunit alpha1	N/A	0	-0.035574	0.179552	0.949762	23.7847	24.5193	23.7491	24.6989	NaN	NaN	23.7491	24.6989					2.7364e-06	5	12.6	0	1	2	2	8.26278	NaN	6.75306	7.78797	8.06487	28.114
TGME49_263060;TGVEG_263060A;TGGT1_361650	proteasome/cyclosome repeat protein;Proteasome/cyclosome repeat-containing protein	HMM: MSAGAVTAQPLPSPKAGLGAAMAFAPPASSAA, NN: MSAGAVTAQPLPSPKAGLGAAMAFAPPASSAA;N/A	0	-0.982641	0.653566	0.487282	24.6381	23.4892	23.6555	24.1427	NaN	NaN	23.6555	24.1427					2.9033e-14	6	5.4	0	0	2	5	8.13226	NaN	NaN	7.32564	8.05858	125.59
TGVEG_211680;TGME49_211680;TGGT1_211680	protein disulfide isomerase	HMM: MRAGFSFALLAVGLLATAVVYSA, NN: MRAGFSFALLAVGLLATAVVYSAAE	0	0.934816	0.555281	-0.425331	29.9806	29.9348	30.9154	30.4901	29.9806	29.9348	30.9154	30.4901					4.3335e-135	113	57.1	13	10	22	22	10.3159	8.795	8.86809	10.0556	9.90135	52.801
TGVEG_311360;TGME49_311360;TGGT1_311360	protein kinase G AGC kinase family member PKG	N/A	0	4.34959	6.128	0.462471	24.7429	23.4269	29.0924	29.5549	NaN	NaN	29.0924	29.5549	+	+	+		9.7789e-139	50	27.9	0	0	16	22	9.76678	NaN	NaN	9.30878	9.5808	111.24
TGVEG_213800;TGME49_213800;TGGT1_213800	protein phosphatase 2b regulatory subunit, putative;putative protein phosphatase 2b regulatory subunit	N/A	0	7.26315	7.96707	0.752085	24.0793	24.1275	31.3424	32.0945	NaN	NaN	31.3424	32.0945	+	+	+		3.8659e-223	76	87.6	0	0	13	9	10.5265	NaN	NaN	10.215	10.2356	19.994
TGGT1_232340;TGVEG_232340;TGME49_232340	protein phosphatase 2C domain-containing protein	N/A	0	8.33124	9.70666	0.240341	24.7245	23.5895	33.0558	33.2961	NaN	NaN	33.0558	33.2961	+	+	+		0	186	62	0	0	36	39	10.9304	NaN	NaN	10.5894	10.666	60.027
TGGT1_267100;TGVEG_267100;TGME49_267100	protein phosphatase 2C domain-containing protein	N/A	0	2.43151	3.72246	0.417112	25.3739	24.5001	27.8054	28.2226	NaN	NaN	27.8054	28.2226	+	+	+		1.3325e-68	26	17.5	0	0	10	12	9.37171	NaN	NaN	8.93656	9.17301	96.722
TGVEG_271380;TGGT1_271380;TGME49_271380	PUB domain-containing protein	N/A	0	2.8129	3.65198	0.013485	23.7638	22.9382	26.5767	26.5902	NaN	NaN	26.5767	26.5902	+	+	+		1.4889e-52	18	15.1	0	0	9	6	8.93914	NaN	NaN	8.71511	8.54446	107.69
TGGT1_260850;TGVEG_260850	putative mitochondrial import inner membrane translocase subunit TIM10	N/A	0	1.6171	0.0865536	-1.94632	24.7899	24.3741	26.407	24.4606	NaN	NaN	26.407	24.4606	+			+	1.9664e-58	5	34	0	0	2	2	8.68785	NaN	NaN	8.60856	7.91025	11.066
TGVEG_315210;TGME49_315210;TGGT1_315210	putative rhoptry protein;rhoptry protein, putative	N/A	7	0.446968	-0.531147	-0.387985	23.5398	24.1299	23.9868	23.5988	NaN	NaN	23.9868	23.5988					3.7748e-11	5	4.1	0	0	2	2	8.10271	NaN	NaN	7.86073	7.73329	115.86
TGVEG_234190;TGME49_234190;TGGT1_234190	putative serine hydroxymethyltransferase 2;serine hydroxymethyltransferase 2, putative	N/A	0	-0.224224	2.29117	0.575609	25.3342	23.3944	25.11	25.6856	25.3342	NaN	25.11	25.6856					5.7148e-20	12	9.7	3	1	3	5	8.64587	7.65731	7.39759	8.03727	8.42012	65.188
TGGT1_251690;TGVEG_251690;TGME49_251690	putative seryl-tRNA synthetase, cytoplasmic;seryl-tRNA synthetase, cytoplasmic, putative	N/A	0	1.70616	0.802111	0.405291	23.5294	24.8388	25.2356	25.6409	NaN	NaN	25.2356	25.6409					9.2888e-37	9	17.2	0	1	3	6	8.60181	NaN	6.76345	8.0916	8.43215	54.146
TGVEG_300240;TGGT1_300240;TGME49_300240	putative syntaxin 6 protein;syntaxin 6, n-terminal protein	N/A	1	1.87518	1.40852	-0.173998	23.7033	23.996	25.5785	25.4045	NaN	NaN	25.5785	25.4045					2.6677e-12	6	13.9	0	0	3	3	8.61024	NaN	NaN	8.31877	8.29944	26.962
TGVEG_287500;TGGT1_287500;TGME49_287500	putative T complex chaperonin;T complex chaperonin, putative	N/A	0	1.37591	1.50216	0.42561	24.0311	24.3305	25.407	25.8326	NaN	NaN	25.407	25.8326					8.0666e-23	7	14.2	1	0	2	6	8.66352	7.16684	NaN	7.97963	8.54495	59.362
TGVEG_261010;TGME49_261010;TGGT1_261010	putative tat-binding family protein;tat-binding family protein, putative	N/A	0	0.860703	1.17792	0.672365	24.0872	24.4423	24.9479	25.6203	NaN	NaN	24.9479	25.6203					1.1874e-15	6	15.2	0	0	3	3	8.55814	NaN	NaN	8.22277	8.28894	46.073
TGVEG_205470;TGGT1_205470;TGME49_205470	putative translation elongation factor 2 family protein;translation elongation factor 2 family protein, putative	N/A	0	-0.419685	0.191511	0.569824	30.0941	30.0527	29.6744	30.2442	30.0941	30.0527	29.6744	30.2442					9.1097e-143	102	32.8	14	11	17	21	10.1232	8.99304	9.06187	9.59827	9.85597	93.088
TGVEG_251810;TGME49_251810;TGGT1_251810	putative translation initiation factor eIF-5A;translation initiation factor eIF-5A, putative	N/A	0	-0.145607	0.151722	0.328846	27.5466	27.5781	27.401	27.7298	27.5466	27.5781	27.401	27.7298					7.7753e-40	20	39.1	3	3	5	4	9.36528	8.2788	8.40652	9.01866	8.91909	17.468
TGVEG_293570;TGME49_293570;TGGT1_293570	putative translocation protein sec62;translocation protein sec62, putative	N/A	2	1.71847	2.44594	0.172487	24.3264	23.7714	26.0449	26.2174	NaN	NaN	26.0449	26.2174					4.4076e-32	11	29.2	0	0	4	7	8.80048	NaN	NaN	8.28785	8.64112	44.899
TGVEG_279100	putative transmembrane protein	HMM: MWRIWRCRLSFLFVTGCLLGALTAGLGS, NN: MWRIWRCRLSFLFVTGCLLGALTA	1	0.684128	2.14285	-0.225758	26.1821	24.4976	26.8662	26.6404	26.1821	NaN	26.8662	26.6404					1.8295e-31	21	18.6	4	2	6	4	9.06532	7.74143	7.54269	8.85784	8.54579	47.657
TGVEG_248460;TGME49_248460;TGGT1_248460	putative ubiquitin;ubiquitin, putative	N/A	0	3.26188	2.7474	-0.819174	24.2648	23.9601	27.5267	26.7075	NaN	NaN	27.5267	26.7075		+			1.579e-32	13	44.4	0	0	6	4	9.11747	NaN	NaN	8.91823	8.6832	24.405
TGGT1_256970;TGVEG_256970;TGME49_256970	putative vacuolar ATP synthase subunit A;vacuolar ATP synthase subunit A, putative	N/A	0	1.06773	1.47156	-0.445185	25.0231	24.1741	26.0908	25.6457	NaN	NaN	26.0908	25.6457					6.9841e-22	11	15.7	1	0	5	5	8.74151	7.25643	NaN	8.35606	8.48626	68.147
TGGT1_207620;TGVEG_207620;TGME49_207620	pyridine nucleotide-disulfide oxidoreductase domain-containing protein	HMM: MASLRSQAWRRVAQRAFSHLSSSSPLFSSGLQGLPAAVSV, NN: MASLRSQAWRRVAQRAFSHLSSSS;HMM: MASLRSQAWRRVAQRAFSHLSSSSPLLSSGLQGL, NN: MASLRSQAWRRVAQRAFSHLSSSS	0	2.88178	2.77397	0.487026	22.9224	23.5172	25.8041	26.2912	NaN	NaN	25.8041	26.2912		+			3.5513e-31	10	14.3	0	0	4	5	8.78128	NaN	NaN	8.33137	8.59091	71.248
TGGT1_284190;TGVEG_284190;TGME49_284190	pyruvate carboxylase	N/A	0	-3.329	-2.96114	1.14527	33.7566	34.534	30.4276	31.5729	33.7566	34.534	30.4276	31.5729					0	334	44.8	38	47	18	31	10.8355	10.1362	10.578	9.58212	10.1177	152.08
TGVEG_256760;TGME49_256760;TGGT1_256760	pyruvate kinase PyK1	N/A	0	1.04155	1.37204	1.43543	24.3724	25.4773	25.4139	26.8494	NaN	NaN	25.4139	26.8494					8.338e-36	19	26.2	1	2	5	10	8.91882	6.95829	8.04689	8.21566	8.73617	57.529
TGME49_207460;TGVEG_207460B;TGGT1_207460B	Rab5B protein	N/A	0	4.9649	5.19644	-0.044241	24.4562	24.1805	29.4211	29.3769	NaN	NaN	29.4211	29.3769	+	+	+		5.9413e-112	35	52.6	0	0	9	9	9.8224	NaN	NaN	9.56141	9.47727	24.677
TGVEG_226430;TGME49_226430;TGGT1_226430	reticulon protein	N/A	3	2.95678	2.46688	-0.690102	24.3284	24.1282	27.2852	26.5951	NaN	NaN	27.2852	26.5951		+			4.3504e-07	7	14.3	0	0	2	2	9.059	NaN	NaN	8.84791	8.64445	21.592
TGGT1_291960;TGVEG_291960;TGME49_291960	rhoptry kinase family protein ROP40 (incomplete catalytic triad)	HMM: MTPSTCCFGVLFQSFRGNSASAS, NN: MTPSTCCFGVLFQSFRGNSASA	0	0.353088	0.235462	0.446829	25.5602	26.1246	25.9133	26.3601	25.5602	26.1246	25.9133	26.3601					4.0157e-22	15	13.1	3	3	3	6	8.94532	7.51467	7.90144	8.42225	8.70321	57.904
TGME49_310010;TGGT1_310010;TGVEG_310010B	rhoptry neck protein RON1	HMM: MARSSRAAPSGAFAHGVAKASFTWISGMKTPFGCVFFFCLIALWGFSAAL, NN: MARSSRAAPSGAFAHGVAKASFTWISGMKTPFGCVFFFCLIALWGFSAAL;N/A	0;1	4.17423	3.31968	-1.77666	24.0167	23.0946	28.1909	26.4143	NaN	NaN	28.1909	26.4143		+		+	1.0099e-204	24	14.3	0	0	8	4	9.24642	NaN	NaN	9.13682	8.59483	127.43
TGVEG_223920;TGGT1_223920;TGME49_223920	rhoptry neck protein RON3;rhoptry neck protein, putative	HMM: MTTSPRVAKWALRVLALVFLHHVTVCT, NN: MTTSPRVAKWALRVLALVFLHHVTVCT;HMM: QQTRHILPFGSLFPGGILGK, NN: QQTRHILPFGSLFPGGILGKIMQKLMRSYIMFFHPVLAN	1	-0.0428104	2.42082	1.46684	24.1463	23.1495	24.1035	25.5703	NaN	NaN	24.1035	25.5703					5.4377e-31	12	5.9	2	0	2	9	8.49108	7.2971	NaN	7.67934	8.38416	222.93
TGGT1_309590	rhoptry protein ROP1	HMM: MACRQLLCSVQNLLFFFLRDIYCT, NN: MACRQLLCSVQNLLFFFLRDIYCT;HMM: MACRQLLCSVQNLLFYFLPDIYCT, NN: MACRQLLCSVQNLLFYFLPDIYCT	0	-2.22162	-1.78668	1.9729	33.7888	35.3267	31.5672	33.5401	33.7888	35.3267	31.5672	33.5401					4.8194e-160	154	29.4	15	25	11	19	11.1614	10.0678	10.8049	10.0795	10.7598	49.541
TGGT1_258580;TGVEG_258580;TGME49_258580	rhoptry protein ROP17	HMM: MELVLCFVIITISGVIRESSAL, NN: MELVLCFVIITISGVIRESSAL	0	0.273781	-0.0805225	-0.164991	25.8478	26.0371	26.1216	25.9566	25.8478	26.0371	26.1216	25.9566					1.4876e-16	12	9.9	3	2	5	4	8.93173	7.65493	7.82136	8.61601	8.51855	69.053
TGGT1_205250	rhoptry protein ROP18	HMM: MFSVQRPPLTRTVVRMGLATLLPKTACLAGLNVALVFLLFQVQDGTGI, NN: MFSVQRPPLTRTVVRMGLATLLPKTACLAGLNVALVFLLFQVQDGTGI;HMM: MFSVQRPPLTRTVVRMGLATLLPKTACLAVLNVALVFLLFQVQDGTGI, NN: MFSVQRPPLTRTVVRMGLATLLPKTACLAVLNVALVFLLFQVQDGTGI	0;1	-0.304674	0.525129	0.323351	27.8258	27.3193	27.5211	27.8445	27.8258	27.3193	27.5211	27.8445					2.9687e-55	36	13.7	6	4	6	6	9.37105	8.40966	8.26019	8.94524	9.01263	62.342
TGGT1_363030;TGVEG_363030	rhoptry protein ROP2A;rhoptry protein ROP8	HMM: MENCASVRSSSCLIWLAAAFFVSALGH, NN: MENCASVRSSSCLIWLAAAFFVSALGH;HMM: MFSVLRNRNMRHGPSIGSSSCLIWLAAAFFVSALGH, NN: MFSVLRNRNMRHGPSIGSSSCLIWLAAAFFVSALGH;N/A	0;1	-1.57418	-0.744261	2.31152	27.0569	28.5385	25.4827	27.7943	27.0569	28.5385	25.4827	27.7943					3.2659e-66	35	24.1	4	9	3	8	9.2882	8.10887	8.72943	8.11737	9.05918	64.031
TGVEG_295125;TGGT1_295125;TGME49_295125	rhoptry protein ROP4	HMM: MGHPTSFGQPSCLVWLAAAFLVLGLCLVQQGAGI, NN: MGHPTSFGQPSCLVWLAAAFLVLGLCLVQQGAGI;HMM: MGHPTSFGQPSCLVWLAAAFLVLGLCLVQQGAGR, NN: MGHPTSFGQPSCLVWLAAAFLVLGLCLVQQGAGR	1	-1.27286	-1.16921	1.37675	26.4268	27.6999	25.154	26.5307	26.4268	27.6999	25.154	26.5307	+				2.2293e-48	13	32.1	2	3	2	2	8.97005	7.91459	8.49321	8.18915	8.58582	40.181
TGVEG_308090;TGGT1_308090	rhoptry protein ROP5	HMM: MATKLARLATWLVLVGCLLWRAGAV, NN: MATKLARLATWLVLVGCLLWRAGAV	0	-0.307007	-0.974962	0.0869331	31.1253	31.8802	30.8183	30.9053	31.1253	31.8802	30.8183	30.9053					1.7472e-184	159	37.9	16	17	18	20	10.4239	9.41115	9.65692	9.95407	10.0181	60.775
TGVEG_258660;TGME49_258660;TGGT1_258660	rhoptry protein ROP6	HMM: MRSSVGQSRLPLKFFLAPFSVKNSVFALFFVFALVCVSGL, NN: MRSSVGQSRLPLKFFLAPFSVKNSVFALFFVFALVCVSGL;HMM: MRSSVGQSRLPLKFFLAPFSVQNSVFALFFVFALVCVSGL, NN: MRSSVGQSRLPLKFFLAPFSVQNSVFALFFVFALVCVSGLSW	1;2	5.37399	5.99497	-1.16643	24.5907	22.8033	29.9647	28.7983	NaN	NaN	29.9647	28.7983		+		+	2.1195e-71	22	18.5	0	0	8	4	9.82845	NaN	NaN	9.69118	9.26141	51.403
TGVEG_295110;TGME49_295110;TGGT1_295110	rhoptry protein ROP7	HMM: MGHPTSFGQPSCLVWLAAAFLVLGLCLVQQGAGI, NN: MGHPTSFGQPSCLVWLAAAFLVLGLCLVQQGAGI	1	-0.98019	-1.27762	0.980453	29.1769	30.4547	28.1967	29.1771	29.1769	30.4547	28.1967	29.1771	+				2.3951e-109	60	35.8	9	12	6	15	9.80085	8.72953	9.33451	8.76671	9.48299	63.394
TGVEG_243730;TGME49_243730;TGGT1_243730	rhoptry protein ROP9	HMM: MTHPNPLQTRFSRSASLVSRMPLVRLFFTIAAPLLFSPSPCP, NN: MTHPNPLQTRFSRSASLVSRMPLVRLFFTIAAPL;HMM: MTHPNPLQTRFSRSASLVSRMPLVRLFFTIAAPLLFSPSPFPFLPLKTHCLAI, NN: MTHPNPLQTRFSRSASLVSRMPLVRLFFTIAAPL	0;1	-0.0359364	2.37582	0.339037	26.2057	24.133	26.1698	26.5088	26.2057	NaN	26.1698	26.5088					1.1477e-19	17	20.7	2	2	5	5	8.97851	7.66281	7.55042	8.59942	8.67451	37.701
TGVEG_215470;TGME49_215470;TGGT1_215470	ribosomal protein RPL10A	N/A	0	1.21651	0.792234	-0.684328	26.9259	26.6659	28.1424	27.4581	26.9259	26.6659	28.1424	27.4581					8.4486e-34	24	40.1	3	2	7	4	9.41191	7.89692	8.04599	9.22955	8.84206	24.603
TGVEG_309820;TGME49_309820;TGGT1_309820	ribosomal protein RPL11	N/A	0	1.64477	1.35361	0.282385	24.0493	24.6229	25.6941	25.9765	NaN	NaN	25.6941	25.9765					6.7654e-08	6	8	1	1	1	1	8.78825	7.54526	7.78431	8.37872	8.44557	20.199
TGVEG_254440;TGME49_254440;TGGT1_254440	ribosomal protein RPL12	N/A	0	0.948914	0.69537	0.78092	24.1263	25.1608	25.0753	25.8562	NaN	NaN	25.0753	25.8562					1.2174e-14	6	25.5	1	0	3	2	8.62971	7.1116	NaN	8.23515	8.38294	17.821
TGVEG_263050;TGME49_263050;TGGT1_263050	ribosomal protein RPL13	N/A	0	0.0141888	2.85796	0.207191	26.5243	23.8878	26.5385	26.7457	26.5243	NaN	26.5385	26.7457					1.1054e-19	16	24.2	3	2	6	6	9.07225	7.75429	7.68893	8.73856	8.72233	39.682
TGVEG_292130;TGME49_292130;TGGT1_292130	ribosomal protein RPL13A	N/A	0	-0.106453	0.175318	-0.534851	28.7386	27.922	28.6322	28.0973	28.7386	27.922	28.6322	28.0973					4.4568e-28	35	35.3	6	3	9	8	9.61513	8.64243	8.32648	9.27203	9.2042	32.749
TGVEG_267060;TGME49_267060;TGGT1_267060	ribosomal protein RPL14	N/A	0	-0.783028	-0.0237827	0.848143	26.0124	26.1013	25.2293	26.0775	26.0124	26.1013	25.2293	26.0775	+				2.6955e-13	14	29.9	3	3	3	4	8.83116	7.7845	7.93596	8.21461	8.56443	17.878
TGVEG_228470;TGME49_228470;TGGT1_228470	ribosomal protein RPL15	N/A	0	-1.28114	3.85531	-0.746059	29.8757	23.9932	28.5945	27.8485	29.8757	NaN	28.5945	27.8485	+				4.233e-19	32	30.7	6	1	6	4	9.57701	8.99835	7.68003	9.30986	8.83926	24.325
TGVEG_299050;TGME49_299050;TGGT1_299050	ribosomal protein RPL17	N/A	0	-0.625078	-0.41338	0.0826664	26.1814	26.0524	25.5564	25.639	26.1814	26.0524	25.5564	25.639					1.1437e-14	16	25.6	2	2	4	5	8.88062	7.74247	7.73492	8.49599	8.52732	22.269
TGVEG_300000;TGME49_300000;TGGT1_300000	ribosomal protein RPL18	N/A	0	0.0102997	-0.309137	-1.80747	29.2487	27.7607	29.259	27.4515	29.2487	27.7607	29.259	27.4515	+			+	1.0217e-27	32	40.6	5	2	8	6	9.66456	8.85566	8.13344	9.46486	8.92915	21.17
TGVEG_262670;TGME49_262670;TGGT1_262670	ribosomal protein RPL18A	N/A	0	0.628727	0.333572	0.210878	26.6923	27.1984	27.3211	27.5319	26.6923	27.1984	27.3211	27.5319					3.4008e-33	21	39.9	2	4	7	4	9.29842	7.81521	8.33901	9.00398	8.84205	21.33
TGVEG_289530;TGME49_289530;TGGT1_289530	ribosomal protein RPL19	N/A	0	-0.785776	-0.536022	-1.49884	29.2985	27.5499	28.5128	27.0139	29.2985	27.5499	28.5128	27.0139				+	9.956e-23	23	28.9	5	2	4	4	9.52103	8.86794	8.09982	9.27117	8.76969	22.16
TGVEG_245680;TGME49_245680;TGGT1_245680	ribosomal protein RPL21	N/A	0	-0.595516	3.0535	0.0379658	27.3069	23.6958	26.7113	26.7493	27.3069	NaN	26.7113	26.7493					6.9266e-29	20	39.5	5	2	6	3	9.01242	8.3462	7.95316	8.71878	8.28773	17.894
TGVEG_239760;TGME49_239760;TGGT1_239760	ribosomal protein RPL22	N/A	0	-0.362886	2.28796	0.315285	26.0892	23.7536	25.7263	26.0416	26.0892	NaN	25.7263	26.0416					9.2893e-10	9	21.1	2	1	2	2	8.80938	7.85728	7.61163	8.38144	8.46416	15.073
TGVEG_312090;TGME49_312090;TGGT1_312090	ribosomal protein RPL23	N/A	0	0.323774	0.0457172	-0.689915	26.7043	26.2924	27.028	26.3381	26.7043	26.2924	27.028	26.3381					1.8456e-40	25	42.4	3	3	4	4	9.09534	7.99147	7.97835	8.8471	8.54297	14.818
TGVEG_238010;TGME49_238010;TGGT1_238010	ribosomal protein RPL23A	N/A	0	-0.433188	-0.31703	0.114008	26.1113	26.1092	25.6782	25.7922	26.1113	26.1092	25.6782	25.7922					7.1771e-15	10	25.7	3	2	2	4	8.77827	7.91555	8.0103	8.09043	8.46581	18.561
TGVEG_262690;TGGT1_262690;TGME49_262690	ribosomal protein RPL27	N/A	0	2.90547	0.913559	0.113817	23.9776	26.0833	26.8831	26.9969	NaN	26.0833	26.8831	26.9969					3.554e-28	13	40.8	1	2	5	5	9.11711	7.35029	7.77194	8.84224	8.72638	16.33
TGVEG_227360;TGME49_227360;TGGT1_227360	ribosomal protein RPL3	N/A	0	-1.2604	-0.354223	0.231253	28.5913	27.9164	27.3309	27.5622	28.5913	27.9164	27.3309	27.5622					3.2174e-48	35	32.1	10	7	5	9	9.34786	8.6605	8.46685	8.69955	8.98964	44.056
TGVEG_232230;TGME49_232230;TGGT1_232230	ribosomal protein RPL30	N/A	0	0.95298	2.69747	0.396486	25.2595	23.9115	26.2125	26.6089	NaN	NaN	26.2125	26.6089					3.6132e-34	8	32.4	1	1	2	3	8.92039	7.38088	7.54118	8.44714	8.69348	11.661
TGVEG_266070;TGME49_266070;TGGT1_266070	ribosomal protein RPL31	N/A	0	-0.0220356	0.240374	0.295908	26.4158	26.4493	26.3937	26.6897	26.4158	26.4493	26.3937	26.6897					1.2908e-11	13	27.5	3	1	3	2	8.99947	8.15878	7.82788	8.70442	8.4488	14.355
TGVEG_227600;TGME49_227600;TGGT1_227600	ribosomal protein RPL34	N/A	0	-2.13713	0.770798	-1.40577	30.6711	26.3574	28.534	27.1282	30.6711	26.3574	28.534	27.1282				+	9.4836e-20	37	35.1	6	3	5	4	9.85849	8.97726	7.85757	9.62259	9.30203	15.383
TGVEG_238250;TGME49_238250;TGGT1_238250	ribosomal protein RPL36	N/A	0	-1.36222	-1.8704	0.520052	31.3426	32.3708	29.9803	30.5004	31.3426	32.3708	29.9803	30.5004					6.0595e-68	63	50.5	8	8	6	8	10.3307	9.4374	9.86345	9.65379	9.8367	11.407
TGGT1_309120;TGVEG_309120;TGME49_309120	ribosomal protein RPL4	HMM: MCLSLCLCPCVSAAFSR, NN: MCLSLCLCPCVSAA;N/A	0	0.440731	0.883707	0.177443	27.1508	26.8853	27.5916	27.769	27.1508	26.8853	27.5916	27.769					4.6329e-51	26	32.9	4	3	8	9	9.37223	8.06633	8.11334	9.0421	9.00355	45.748
TGVEG_203630;TGME49_203630;TGGT1_203630	ribosomal protein RPL44	N/A	0	-1.61581	-0.436878	-1.03105	28.8134	26.6034	27.1976	26.1665	28.8134	26.6034	27.1976	26.1665				+	1.2202e-18	12	28.6	4	2	3	2	9.16337	8.73272	7.9636	8.78559	8.33025	12.062
TGVEG_320050;TGME49_320050;TGGT1_320050	ribosomal protein RPL5	N/A	0	-0.160095	-0.0452309	0.198893	27.6993	27.7833	27.5392	27.7381	27.6993	27.7833	27.5392	27.7381					8.7841e-41	36	39	5	4	9	7	9.39801	8.32408	8.38191	9.05196	8.96445	35.341
TGVEG_313390;TGME49_313390;TGGT1_313390	ribosomal protein RPL6	HMM: MSGNCQATLGFLPIASHSRAK, NN: MSGNCQATLGFLPIASHSRAKVCFCVDCGTAADVFFFPAPLRAL;N/A	0	-1.19862	0.272259	0.715117	25.0545	24.2987	23.8559	24.571	NaN	NaN	23.8559	24.571					4.6727e-08	7	14.2	1	1	3	2	8.3149	6.98455	7.38108	7.91425	7.95763	31.222
TGVEG_314810;TGME49_314810;TGGT1_314810	ribosomal protein RPL7	N/A	0	0.679026	0.59651	0.00871849	26.6043	26.6955	27.2833	27.292	26.6043	26.6955	27.2833	27.292					3.3128e-19	22	24.8	4	2	6	5	9.26371	7.92856	7.96102	8.96086	8.87227	30.121
TGVEG_261570;TGME49_261570;TGGT1_261570	ribosomal protein RPL7A	N/A	0	-0.746454	0.214127	0.64399	26.6492	26.3326	25.9028	26.5468	26.6492	26.3326	25.9028	26.5468					1.3719e-59	17	27.5	4	2	4	5	8.99185	8.05729	7.81646	8.5053	8.68276	31.031
TGVEG_204020;TGME49_204020;TGGT1_204020	ribosomal protein RPL8	N/A	0	-0.296137	0.24943	0.101341	27.9323	27.4881	27.6362	27.7375	27.9323	27.4881	27.6362	27.7375	+				5.379e-78	29	35.8	7	4	5	6	9.36207	8.49889	8.35957	8.87664	8.98478	28.254
TGVEG_284560;TGME49_284560;TGGT1_284560	ribosomal protein RPL9	N/A	0	0.739342	0.998142	0.159313	27.1995	27.1	27.9388	28.0981	27.1995	27.1	27.9388	28.0981					7.2352e-24	17	24.7	3	2	3	4	9.47145	7.99283	8.18018	9.08102	9.17788	21.424
TGVEG_218410;TGME49_218410;TGGT1_218410	ribosomal protein RPP0	N/A	0	1.49152	0.830593	-1.0022	29.2442	28.9029	30.7357	29.7335	29.2442	28.9029	30.7357	29.7335				+	1.1502e-71	63	40.8	6	4	9	9	10.1531	8.63457	8.62117	9.92768	9.69127	34.157
TGVEG_226970;TGME49_226970;TGGT1_226970	ribosomal protein RPS11	N/A	0	-0.144106	0.487984	0.581244	27.5037	27.4529	27.3596	27.9408	27.5037	27.4529	27.3596	27.9408					6.1487e-29	22	36	4	3	5	5	9.38552	8.26252	8.27098	8.8783	9.11534	18.677
TGVEG_205340;TGME49_205340;TGGT1_205340	ribosomal protein RPS12	N/A	0	0.573895	0.6474	0.0605659	26.2262	26.2132	26.8001	26.8606	26.2262	26.2132	26.8001	26.8606					3.8941e-24	15	31	3	2	4	3	9.13963	7.75361	7.78071	8.81896	8.78034	15.399
TGVEG_263700;TGME49_263700;TGGT1_263700	ribosomal protein RPS14	N/A	0	0.307711	2.90954	0.265501	25.5792	23.2428	25.8869	26.1524	25.5792	NaN	25.8869	26.1524					7.8982e-52	7	26.9	2	1	2	3	8.83981	7.66994	7.63979	8.40953	8.53704	16.301
TGVEG_213350;TGME49_213350;TGGT1_213350	ribosomal protein RPS15	N/A	0	0.458805	1.2951	0.480801	25.6216	25.2661	26.0804	26.5612	25.6216	25.2661	26.0804	26.5612					1.238e-11	11	25.3	3	1	2	2	8.92241	7.74504	7.67818	8.53704	8.58966	17.157
TGVEG_234450;TGME49_234450;TGGT1_234450	ribosomal protein RPS15A	N/A	1	2.94386	-0.0887642	-0.120327	23.6813	26.5936	26.6252	26.5049	NaN	26.5936	26.6252	26.5049					3.7276e-18	15	28.1	2	2	5	5	9.06934	7.84114	7.92978	8.73672	8.67515	26.589
TGVEG_263040;TGME49_263040;TGGT1_263040	ribosomal protein RPS16	N/A	0	0.415541	0.521761	0.249508	27.2329	27.3762	27.6484	27.8979	27.2329	27.3762	27.6484	27.8979					1.2177e-17	25	31.8	5	3	5	6	9.40193	8.21088	8.19064	8.99088	9.08856	24.055
TGVEG_225080;TGME49_225080;TGGT1_225080	ribosomal protein RPS18	N/A	0	0.681332	0.533978	0.177765	27.5793	27.9044	28.2607	28.4384	27.5793	27.9044	28.2607	28.4384					3.7359e-24	27	44.9	3	5	6	5	9.56592	8.15458	8.52177	9.19896	9.21064	17.722
TGVEG_212290;TGME49_212290;TGGT1_212290	ribosomal protein RPS19	N/A	0	3.86314	1.00668	-1.25095	25.092	26.6975	28.9551	27.7042	NaN	26.6975	28.9551	27.7042				+	2.1007e-41	22	23	1	2	7	3	9.54361	7.82731	8.04458	9.39721	8.91513	34.968
TGVEG_305520;TGME49_305520;TGGT1_305520	ribosomal protein RPS2	N/A	0	1.08207	4.3198	-0.218014	26.7572	23.3015	27.8393	27.6213	26.7572	NaN	27.8393	27.6213					2.9599e-28	21	21.2	2	2	5	4	9.44099	7.90639	7.51811	9.15788	9.06785	29.336
TGVEG_229670;TGME49_229670;TGGT1_229670	ribosomal protein RPS23	N/A	0	0.0191498	-0.123079	-0.253958	26.7326	26.6209	26.7518	26.4978	26.7326	26.6209	26.7518	26.4978	+				1.147e-20	22	42.7	3	2	4	4	9.12126	7.96421	7.93028	8.72536	8.78784	15.801
TGVEG_215460;TGME49_215460;TGGT1_215460	ribosomal protein RPS24	N/A	0	2.41229	-0.02742	0.332352	23.2911	26.0632	25.7034	26.0358	NaN	26.0632	25.7034	26.0358					1.1508e-13	8	13.1	2	2	3	3	8.83189	7.6911	7.95806	8.35353	8.49614	30.375
TGVEG_231140;TGME49_231140;TGGT1_231140	ribosomal protein RPS25	N/A	0	1.89891	0.395971	0.682156	23.5021	25.6871	25.401	26.0831	NaN	25.6871	25.401	26.0831					1.6529e-06	8	13	2	2	2	2	8.78414	7.53204	7.84035	8.32697	8.46648	18.682
TGVEG_232300;TGME49_232300;TGGT1_232300	ribosomal protein RPS3	HMM: MLWFHSRREQGTHGGLLWLLCVCRLQ, NN: MLWFHSRREQGTHGGLLWLLCVCRLQTCK;HMM: MLWFHSRREQRTHGGLLWLLCVCRLQ, NN: MLWFHSRREQRTHGGLLWLLCVCRLQTCK	0	0.0406532	0.510475	0.155733	27.681	27.3669	27.7217	27.8774	27.681	27.3669	27.7217	27.8774					1.4386e-27	26	35.3	4	4	6	5	9.39196	8.34963	8.32972	9.0029	9.00937	28.736
TGVEG_232710;TGME49_232710;TGGT1_232710	ribosomal protein RPS3A	N/A	0	0.0327148	0.696133	-0.346148	27.9556	26.946	27.9883	27.6422	27.9556	26.946	27.9883	27.6422					4.1221e-42	35	40.2	7	3	8	8	9.44138	8.2814	8.16414	9.04727	9.11757	29.371
TGVEG_207440;TGME49_207440;TGGT1_207440	ribosomal protein RPS4	N/A	1	0.296707	1.00894	0.309513	27.5679	27.1652	27.8646	28.1741	27.5679	27.1652	27.8646	28.1741					5.0284e-35	34	39.7	5	2	11	7	9.48093	8.1967	8.14823	9.1432	9.12639	35.507
TGVEG_242330;TGME49_242330;TGGT1_242330	ribosomal protein RPS5	N/A	0	1.06382	1.31738	-0.0102177	27.9594	27.6956	29.0232	29.013	27.9594	27.6956	29.0232	29.013					1.1363e-58	53	44.8	5	5	12	11	9.80393	8.20515	8.3057	9.46319	9.46485	21.613
TGVEG_210690;TGME49_210690;TGGT1_210690	ribosomal protein RPS6	N/A	0	-0.723577	1.08841	0.678881	26.1873	25.0542	25.4637	26.1426	26.1873	NaN	25.4637	26.1426					2.8304e-16	14	19.5	3	1	2	3	8.73035	7.96499	NaN	8.05542	8.52061	28.956
TGVEG_245460;TGME49_245460;TGGT1_245460	ribosomal protein RPS8	N/A	0	-0.700422	-0.0841427	-0.607552	28.8928	27.669	28.1924	27.5848	28.8928	27.669	28.1924	27.5848	+				1.3014e-49	28	42.4	6	5	6	5	9.46696	8.70986	8.44417	9.11374	8.92449	23.561
TGVEG_248480;TGME49_248480;TGGT1_248480	ribosomal protein RPS9	N/A	0	0.958586	1.57122	0.496761	24.3057	24.1898	25.2643	25.761	NaN	NaN	25.2643	25.761					2.2779e-13	10	33	1	3	4	2	8.73592	7.11978	8.04521	8.4192	8.19786	21.684
TGVEG_266060;TGME49_266060;TGGT1_266060	ribosomal protein RPSA	N/A	0	3.26687	4.04429	-0.32213	24.5278	23.4282	27.7946	27.4725	NaN	NaN	27.7946	27.4725		+			6.2981e-95	13	46.3	2	1	6	4	9.28217	7.63978	7.76109	9.07254	8.80062	31.512
TGVEG_267440;TGME49_267440;TGGT1_267440	RING zinc finger protein	N/A	0	2.75537	2.47856	-0.157454	24.3873	24.5067	27.1427	26.9852	NaN	NaN	27.1427	26.9852	+	+	+		1.4407e-25	11	24.2	0	0	5	7	9.08271	NaN	NaN	8.73137	8.82679	41.492
TGVEG_262620;TGME49_262620;TGGT1_262620	RNA recognition motif-containing protein	N/A	0	0.310293	0.608765	-0.551601	29.0218	28.1717	29.3321	28.7805	29.0218	28.1717	29.3321	28.7805					1.0638e-122	55	43	8	4	12	10	9.80623	8.67196	8.44705	9.53955	9.33989	31.76
TGVEG_321500;TGME49_321500;TGGT1_321500	RNA recognition motif-containing protein	N/A	0	-1.28452	0.595743	1.62763	25.6363	25.3837	24.3518	25.9794	25.6363	25.3837	24.3518	25.9794					4.3494e-15	15	10.3	4	3	2	4	8.72437	7.78624	7.57986	7.78938	8.5675	50.952
TGVEG_262040;TGME49_262040;TGGT1_262040	SAC3/GANP family protein	N/A	0	1.33135	0.864448	-0.104668	25.4443	25.8066	26.7757	26.671	25.4443	25.8066	26.7757	26.671					5.89e-29	20	33.1	2	2	7	6	9.07969	7.43973	7.70372	8.77086	8.72702	29.693
TGGT1_267140;TGME49_267140;TGGT1_367060;TGVEG_267140;TGME49_267160	SAG-related sequence protein SRS38D;SAG-related sequence SRS38B;SAG-related sequence SRS38D	HMM: MASVSLGSPAATKAAASASRPPVMGGVPVKLHLASRLGLVSLLLVATTAGLLGY, NN: MASVSLGSPAATKAAASASRPPVMGGVPVKLHLASRLGLVSLLLVATTAG;HMM: MASVSLGSPAVIKAAASASRPPVMRVVPVKLHLAFRLGLLSLLLVATMAGLLGY, NN: MASVSLGSPAVIKAAASASRPPVMRVVPVKLHLAFRLGLLSLLLVATMAG;HMM: MAYTIMVGEVSVAKARSSTTPCSLARVVKVRLSSASRLGCVTLLLLASATGL, NN: MAYTIMVGEVSVAKARSSTTPCSLARVVKVRLSSASRLGCVTLLLLASATGL;HMM: MAYTIMVGEVSVAKARSSTTPFSLARVVKVRLSSASRLGCVALLLL…	0;2	3.96691	2.08564	-1.7593	24.7511	24.8731	28.718	26.9587	NaN	NaN	28.718	26.9587		+		+	1.8884e-46	18	28.5	0	0	9	4	9.39636	NaN	NaN	9.3437	8.45393	41.017
TGME49_320180;TGGT1_320180;TGVEG_320180	SAG-related sequence protein SRS40D;SAG-related sequence SRS16C;SAG-related sequence SRS40D	HMM: MARSASMRQRLGGLGSKACKMMAVCMGGVLLLSTGNTAAE, NN: MARSASMRQRLGGLGSKACKMMAVCMGGVLLLSTGNTAAE;HMM: MARSASMRQRLGGLGSKARKMMAVCMGGVLLLSTGNGA, NN: MARSASMRQRLGGLGSKARKMMAVCMGGVLLLSTGNGAAE;HMM: MARSASMRQRLGGLGSKARKMMAVCMGGVLLLSTGNTAAE, NN: MARSASMRQRLGGLGSKARKMMAVCMGGVLLLSTGNTAAE;HMM: MVMMGSMQQRRGGLRSNARQLLAVCMSGVVFFSSGQAVAD, NN: MVMMGSMQQRRGGLRSNARQLLAVCMSGVVFFSSGQAVAD;HMM: MVMMMGSMQQRRGGLRSNARQLLAVCMS…	0;1	2.63853	-0.283588	-3.06434	24.7561	24.6138	27.3946	24.3303	NaN	NaN	27.3946	24.3303				+	2.3221e-45	12	27.9	0	0	9	2	8.93504	NaN	NaN	8.90077	7.8152	42.345
TGVEG_319350;TGME49_319350;TGGT1_319350	SAG-related sequence SRS17B	HMM: MASQKVLVCLTVAGCLLATFHTFCASVSAASAG, NN: MASQKVLVCLTVAGCLLAT	2	6.50315	5.16935	-1.44511	23.3492	23.2379	29.8524	28.4073	NaN	NaN	29.8524	28.4073		+		+	1.3024e-108	28	33	0	0	8	5	9.76459	NaN	NaN	9.62455	9.20493	39.375
TGME49_301180;TGGT1_301180;TGVEG_301180	SAG-related sequence SRS19F	HMM: MLTAQTTRRVDGRIRPRVTAVMAICMGGVLLFSAGQVVAD, NN: MLTAQTTRRVDGRIRPRVTAVMAICMGGVLLFSAGQVVAD	1	2.37887	0.759525	-1.09057	24.4171	24.9459	26.796	25.7054	NaN	NaN	26.796	25.7054				+	2.7778e-25	10	22.5	0	0	6	3	8.87074	NaN	NaN	8.73164	8.30859	40.974
TGGT1_285870;TGME49_285870;TGVEG_285870	SAG-related sequence SRS20A	HMM: MVSCKRLAASRRQCLFFNACLFCLFICTVQIRAIAGA, NN: MVSCKRLAASRRQCLFFNACLFCLFICTVQIRAIAGA	1	5.67589	4.99384	-1.9273	24.8207	23.5754	30.4966	28.5693	NaN	NaN	30.4966	28.5693		+		+	8.907e-99	28	54.3	0	0	14	4	9.92042	NaN	NaN	9.85458	9.06867	34.955
TGGT1_233450;TGVEG_233450;TGME49_233450	SAG-related sequence SRS29A	N/A	1	4.7839	2.57557	-2.05014	24.9725	25.1307	29.7564	27.7063	NaN	NaN	29.7564	27.7063		+		+	1.1075e-94	23	38.1	0	0	13	4	9.69012	NaN	NaN	9.62151	8.85488	44.243
TGGT1_233460;TGVEG_233460;TGME49_233460	SAG-related sequence SRS29B	HMM: MSVSLHHFIISSGFLASMFPKAVRRAVTAGVFAAPTLMSFLRCGAMAS, NN: MSVSLHHFIISSGFLASMFPKAVRRAVTAGVFAAPTLMSFLRCGAMAS;HMM: MSVSLHHFIISSGFLTSMFPKAVRRAVTAGVFAAPTLMSFLRCGVMAS, NN: MSVSLHHFIISSGFLTSMFPKAVRRAVTAGVFAAPTLMSFLRCGVMAS	0	5.69146	4.55854	-1.28264	30.2388	30.089	35.9302	34.6476	30.2388	30.089	35.9302	34.6476		+		+	0	329	71.4	11	7	23	20	11.6212	8.99609	9.03579	11.4642	11.096	34.829
TGGT1_233480;TGVEG_233480;TGME49_233480	SAG-related sequence SRS29C	HMM: MATRASLARQKTGAACLAVLTASPSVVAAK, NN: MATRASLARQKTGAACLAVLTASPSVVAAKPWKRWVGVSVILASAFAVGVSAG	0	6.28307	4.28556	-1.93391	27.0837	27.1472	33.3667	31.4328	27.0837	27.1472	33.3667	31.4328		+		+	6.3182e-161	96	29.8	3	2	9	5	10.806	8.07148	8.19833	10.6848	10.1845	39.215
TGGT1_273130;TGME49_273130;TGVEG_273130	SAG-related sequence SRS30A	N/A	0	5.0246	2.99002	-1.35011	24.2324	24.9169	29.257	27.9069	NaN	NaN	29.257	27.9069		+		+	3.0473e-176	31	44.5	0	0	13	7	9.58937	NaN	NaN	9.5116	8.80405	38.496
TGVEG_271050;TGGT1_271050;TGME49_271050	SAG-related sequence SRS34A	HMM: MSFSKTTSLASLALTGLFVVFKFALAS, NN: MSFSKTTSLASLALTGLFVVFKFALAS	0	7.79439	5.18341	-1.42096	26.741	27.931	34.5354	33.1144	26.741	27.931	34.5354	33.1144		+		+	1.8312e-154	112	55.4	3	3	9	10	11.1818	8.24588	8.43748	11.0381	10.627	18.981
TGGT1_308840;TGVEG_308840;TGME49_308840	SAG-related sequence SRS51	N/A	0	8.62513	6.36161	-1.30184	23.4412	24.4029	32.0664	30.7645	NaN	NaN	32.0664	30.7645		+		+	8.7633e-183	86	28.9	1	0	8	8	10.4574	7.10544	NaN	10.3425	9.82212	38.038
TGGT1_315320;TGVEG_315320;TGME49_315320	SAG-related sequence SRS52A	HMM: MARISVVPIRLIMTGSLFFVVVVLMSTTALRAE, NN: MARISVVPIRLIMTGSLFFVVVVLMSTTALRAE;HMM: MARISVVPIRLITMGSLFFVVVVLMSTTALRAE, NN: MARISVVPIRLITMGSLFFVVVVLMSTTALRAE	1	7.1714	5.82339	-1.94913	24.3125	23.7114	31.4839	29.5348	NaN	NaN	31.4839	29.5348		+		+	8.4005e-206	49	59.6	0	0	14	10	10.2199	NaN	NaN	10.1407	9.44212	34.236
TGGT1_315410;TGVEG_315410;TGME49_315410	SAG-related sequence SRS53F	HMM: MDSTRRRMAGALFFVVAALMSPAVPRAETA, NN: MDSTRRRMAGALFFVVAALMSPAVPRAETA	0	2.20858	-0.200031	-2.17876	24.7295	24.9594	26.9381	24.7593	NaN	NaN	26.9381	24.7593				+	5.445e-32	13	34.2	0	0	9	2	8.8344	NaN	NaN	8.76335	8.01313	34.139
TGGT1_315740	SAG-related sequence SRS54	N/A	0	1.82434	0.185823	-1.14787	24.5543	25.045	26.3787	25.2308	NaN	NaN	26.3787	25.2308				+	1.5552e-15	8	19	0	0	5	2	8.74025	NaN	NaN	8.63037	8.08962	41.68
TGVEG_226860;TGGT1_226860	SAG-related sequence SRS67	HMM: MAFRKPLFSGRQWVALMCVFAAVGGK, NN: MAFRKPLFSGRQWVALMCVFAAVGGK;HMM: MGFRKPVFSGRQWVALMCVFAAVGGK, NN: MGFRKPVFSGRQWVALMCVFAAVGGK	1	4.78522	3.08268	-1.2351	23.3998	23.8673	28.185	26.9499	NaN	NaN	28.185	26.9499	+	+		+	1.4072e-60	14	44.3	0	0	6	3	9.27637	NaN	NaN	9.18344	8.56118	23.039
TGVEG_239890;TGME49_239890;TGGT1_239890	SCP family extracellular subfamily protein	HMM: MANKAVLALALLLCVASSALVQST, NN: MANKAVLALALLLCVASSALVQST	1	4.17257	1.84522	-3.35381	24.6972	23.6708	28.8698	25.516	NaN	NaN	28.8698	25.516				+	4.2605e-71	12	35.8	0	0	8	2	9.37048	NaN	NaN	9.33094	8.31008	26.623
TGVEG_211040;TGME49_211040;TGGT1_211040	Sec61beta family protein	N/A	1	0.585257	1.24193	0.489094	25.1542	24.9866	25.7395	26.2286	NaN	NaN	25.7395	26.2286					9.2361e-13	10	35.4	0	2	2	2	8.77661	NaN	7.27133	8.37903	8.53127	10.103
TGVEG_231850;TGME49_231850;TGGT1_231850	serine-threonine phosophatase 2C (PP2C)	N/A	0	-0.252846	-0.137197	0.0274296	26.313	26.2247	26.0601	26.0875	26.313	26.2247	26.0601	26.0875					3.0623e-56	17	26.3	3	2	4	6	8.93402	8.01376	7.66165	8.54553	8.55482	36.79
TGGT1_204050;TGVEG_204050;TGME49_204050	subtilisin SUB1	HMM: MGSSHAIVACAALIVLLSTNARGL, NN: MGSSHAIVACAALIVLLSTNARGL	0	4.16498	3.30265	-1.0333	24.3259	24.1549	28.4909	27.4576	NaN	NaN	28.4909	27.4576	+	+		+	4.3081e-95	29	25.7	0	1	13	7	9.41996	NaN	7.02011	9.27443	8.86825	85.096
TGVEG_316310;TGME49_316310;TGGT1_316310	superoxide dismutase	N/A	0	5.41055	3.90145	-0.589005	22.8744	23.7945	28.285	27.696	NaN	NaN	28.285	27.696		+			2.3013e-12	9	26.9	0	1	3	4	9.3753	NaN	7.34252	9.1186	9.01578	22.55
TGVEG_272910;TGME49_272910;TGGT1_272910	T-complex protein 1 delta subunit	N/A	0	0.099453	0.605213	0.314875	24.6438	24.453	24.7433	25.0582	NaN	NaN	24.7433	25.0582					4.9311e-16	7	12.5	1	0	3	4	8.43273	NaN	NaN	8.01254	8.2251	58.644
TGVEG_297500;TGME49_297500;TGGT1_297500	T-complex protein 1 eta subunit	N/A	0	0.373423	1.00975	0.862837	24.3811	24.6076	24.7545	25.6173	NaN	NaN	24.7545	25.6173					5.8167e-20	8	13	1	0	3	5	8.5497	7.08128	NaN	8.06521	8.3547	59.463
TGVEG_243710;TGME49_243710;TGGT1_243710	t-complex protein beta subunit	N/A	0	1.45472	0.96006	-0.285984	23.8799	24.0886	25.3347	25.0487	NaN	NaN	25.3347	25.0487					7.7866e-20	7	14.3	1	0	4	3	8.53401	6.96803	NaN	8.28196	8.15011	61.472
TGVEG_214580;TGME49_214580;TGGT1_214580	tetratricopeptide repeat-containing protein	N/A	0	-2.02928	-2.30812	-0.281958	28.9625	28.9594	26.9333	26.6513	28.9625	28.9594	26.9333	26.6513					0.0006804	19	0.8	1	1	1	1	9.44495	8.73478	8.99644	8.76784	8.79612	135.89
TGVEG_299970;TGME49_299970	tetratricopeptide repeat-containing protein	N/A	0	3.89704	3.78397	-0.0695152	24.2579	24.3015	28.155	28.0855	NaN	NaN	28.155	28.0855	+	+	+		6.7097e-70	20	30	0	0	9	7	9.40176	NaN	NaN	9.17032	9.01783	46.498
TGVEG_247350;TGME49_247350;TGGT1_247350	thioredoxin domain-containing protein	HMM: MPQAKTPTAVLSLANVFFSTFIAVSGD, NN: MPQAKTPTAVLSLANVFFSTFIAVSGD	4	6.87475	4.82873	-1.07083	23.5473	24.5225	30.422	29.3512	NaN	NaN	30.422	29.3512		+		+	3.3784e-19	17	25.3	0	0	5	3	9.9713	NaN	NaN	9.79905	9.48639	33.676
TGVEG_309730;TGME49_309730;TGGT1_309730	thioredoxin reductase	HMM: MSCLSVSAARAYAAAAASRPVSAS, NN: MSCLSVSAARAYAAAAASRPVSAS	0	-1.10497	0.542822	0.963457	25.9938	25.3094	24.8888	25.8522	25.9938	25.3094	24.8888	25.8522					6.79e-24	16	12.4	4	3	3	3	8.71414	7.81265	7.75246	8.19072	8.38223	70.781
TGVEG_266120;TGME49_266120;TGGT1_266120	thioredoxin-dependent peroxidase TPX1/2	HMM: MLPLCASSQMYLGQECLSCPVLPRLCLATCLGA, NN: MLPLCASSQMYLGQECLSCPVLPRLCLAT	0	6.09264	5.94689	-0.258455	24.5906	24.4779	30.6833	30.4248	NaN	NaN	30.6833	30.4248		+			6.0946e-122	44	40.5	0	0	11	9	10.1395	NaN	NaN	9.89873	9.76853	37.184
TGVEG_209450;TGME49_209450;TGGT1_209450	TLD protein	N/A	0	4.27087	3.32851	0.285858	23.9074	25.1356	28.1783	28.4641	NaN	NaN	28.1783	28.4641	+	+	+		3.1501e-90	31	17.1	0	0	9	11	9.4627	NaN	NaN	9.11458	9.20415	92.271
TGGT1_262390;TGVEG_262390;TGME49_262390	TLD protein	N/A	0	3.96758	4.01169	0.390192	23.0946	23.4407	27.0622	27.4524	NaN	NaN	27.0622	27.4524	+	+	+		6.2091e-24	14	6.8	0	0	6	8	9.1433	NaN	NaN	8.70252	8.94784	148.06
TGGT1_214080;TGME49_214080	toxofilin	HMM: MAQYKSRPLAAFLLLITVGSLLTASESV, NN: MAQYKSRPLAAFLLLITVGSLLTA;HMM: MAQYKSRPLAAVLLLITVGSLLTASESV, NN: MAQYKSRPLAAVLLLITVGSLLTA	1	-0.928621	-0.422777	1.54657	25.7813	26.822	24.8527	26.3992	25.7813	26.822	24.8527	26.3992					2.5561e-42	18	36.7	4	5	2	5	8.85272	7.73442	8.22277	7.81509	8.62921	27.131
TGME49_229360;TGGT1_229360;TGVEG_229360	transaldolase	N/A	0	1.2619	1.69159	0.215395	24.3013	24.087	25.5632	25.7786	NaN	NaN	25.5632	25.7786					1.331e-17	8	12	0	0	5	2	8.66662	NaN	NaN	8.502	8.1656	61.447
TGME49_320020;TGGT1_320020;TGVEG_320020	transporter, major facilitator family protein	N/A	12	2.09327	2.03398	-0.145241	24.7297	24.6438	26.823	26.6777	NaN	NaN	26.823	26.6777		+			1.467e-100	8	16.3	0	0	5	3	9.01912	NaN	NaN	8.7739	8.65401	62.981
TGVEG_288360;TGGT1_288360;TGME49_288360	tryptophanyl-tRNA synthetase;tryptophanyl-tRNA synthetase (TrpRS2)	HMM: MFFLSTSVIPGAAVFSVRFAR, NN: MFFLSTSVIPGAAVFSVRFAR;N/A	0	0.571711	1.05861	0.491249	27.3308	27.3352	27.9025	28.3938	27.3308	27.3352	27.9025	28.3938					7.2438e-84	41	27.1	6	5	7	13	9.50924	8.19296	8.16089	8.97735	9.29675	77.003
TGVEG_290290;TGME49_290290;TGGT1_290290	ubiquitin-activating enzyme E1 family protein	N/A	0	-0.648796	1.35642	1.10866	24.5232	23.6266	23.8744	24.983	NaN	NaN	23.8744	24.983					1.6952e-25	9	6.1	1	1	4	3	8.36197	6.92761	7.10312	7.97118	8.06221	119.84
TGVEG_235750;TGME49_235750;TGGT1_235750	ULK kinase	N/A	0	2.06167	1.97441	0.626682	24.7008	25.4147	26.7624	27.3891	NaN	NaN	26.7624	27.3891	+				1.8658e-36	13	25.3	0	0	6	6	9.09506	NaN	NaN	8.67661	8.8864	41.224
TGVEG_240630;TGME49_240630;TGGT1_240630	ULK kinase	N/A	0	-0.686474	0.945309	0.56411	25.0833	24.0156	24.3968	24.9609	NaN	NaN	24.3968	24.9609	+				7.4047e-09	4	4.2	0	0	2	2	8.37205	NaN	NaN	7.99407	8.13634	55.715
TGVEG_294250;TGME49_294250;TGGT1_294250	WD domain, G-beta repeat-containing protein	N/A	1	3.09443	4.01398	0.296246	24.4425	23.8192	27.537	27.8332	NaN	NaN	27.537	27.8332		+			1.5952e-32	21	22.2	0	0	10	8	9.27203	NaN	NaN	8.97538	8.96655	55.858
TGGT1_285190;TGVEG_285190;TGME49_285190	zinc finger, C3HC4 type (RING finger) domain-containing protein	N/A	0	4.65617	4.0935	-0.488495	24.2074	24.2815	28.8636	28.375	NaN	NaN	28.8636	28.375	+	+	+		1.9187e-72	21	15.4	0	0	9	7	9.55837	NaN	NaN	9.34633	9.14529	69.997

## Sheet: Base sensitive (GPI)
Protein IDs	Protein names	Signal Peptide	# TM Domains	Log2 FC YnMyr base/YnMyr	MG motif	GPI predictor	PEP	MS/MS Count	Sequence coverage [%]	Razor + unique peptides Myr	Razor + unique peptides Myr base	Razor + unique peptides YnMyr	Razor + unique peptides YnMyr base	Intensity	Intensity Myr	Intensity Myr base	Intensity YnMyr	Intensity YnMyr base	Mol. weight [kDa]
TGVEG_226030;TGME49_226030;TGGT1_226030	AGC kinase	N/A	0	-1.02439			7.2723e-12	9	9.9	0	0	3	1	8.56623	NaN	NaN	8.45782	7.91041	39.41
TGVEG_231640;TGME49_231640;TGGT1_231640	alveolin domain containing intermediate filament IMC1	N/A	0	-1.75191			0	121	55.3	4	1	31	23	10.5012	8.18667	7.57653	10.4007	9.80311	69.596
TGVEG_231630;TGME49_231630;TGGT1_231630	alveolin domain containing intermediate filament IMC4	N/A	0	-2.19873		+	7.5228e-83	49	36.7	3	5	13	8	10.1116	7.86345	8.09384	10.0162	9.37166	50.171
TGVEG_220270;TGME49_220270;TGGT1_220270	alveolin domain containing intermediate filament IMC6	N/A	0	-1.13515			7.4641e-39	10	14.9	0	0	6	3	9.01456	NaN	NaN	8.91643	8.32035	48.634
TGVEG_284540;TGME49_284540;TGGT1_284540	ATP synthase F1, delta subunit protein	N/A	0	-1.00153			3.0082e-26	17	27.8	2	0	6	5	9.19504	7.22102	NaN	9.02812	8.68421	27.635
TGVEG_271970;TGME49_271970;TGGT1_271970	glideosome-associated protein with multiple-membrane spans GAPM3	N/A	5	-1.66709			1.7684e-24	21	26.1	0	0	5	4	9.70876	NaN	NaN	9.60639	9.03096	34.282
TGVEG_324600;TGME49_232940;TGGT1_324600;TGME49_324600	heat shock protein;heat shock protein HSP20	N/A	0	-1.64446			1.4448e-48	49	61.1	2	3	12	8	9.88168	7.82178	8.12303	9.7474	9.26157	20.266
TGVEG_243930;TGME49_243930;TGGT1_243930	hypothetical protein	HMM: MRQFLPLLVLLPLLQRQDSAA, NN: MRQFLPLLVLLPLLQRQDSAA	0	-0.966579		+	2.4998e-63	18	14.8	0	0	11	4	9.21859	NaN	NaN	9.09153	8.62284	101.35
TGGT1_232030;TGVEG_232030;TGME49_232030	hypothetical protein	N/A	0	-1.62827			2.7198e-21	9	27.9	0	0	5	2	9.06397	NaN	NaN	8.98236	8.29787	23.393
TGVEG_215220;TGGT1_215220;TGME49_215220	hypothetical protein	N/A	0	-1.6489			3.6841e-52	31	39.6	3	3	10	8	9.65363	7.90006	7.88777	9.38066	9.28894	63.201
TGVEG_235340;TGGT1_235340;TGME49_235340	hypothetical protein	N/A	0	-2.92514			3.2124e-93	33	37.5	0	0	19	4	9.37747	NaN	NaN	9.33686	8.32813	76.643
TGVEG_235690;TGME49_235690;TGGT1_235690	hypothetical protein	N/A	0	-1.03789			4.0443e-23	13	17.6	0	0	3	2	9.01106	NaN	NaN	8.85864	8.4824	24.978
TGVEG_308860;TGME49_308860;TGGT1_308860	hypothetical protein	N/A	0	-1.15178			1.2878e-20	8	8.9	0	0	4	2	8.48503	NaN	NaN	8.38959	7.78013	69.756
TGGT1_286580;TGVEG_286580;TGME49_286580	hypothetical protein;putative lysophospholipase	N/A	0	-1.92423			2.4578e-87	33	26.1	0	0	21	5	9.35467	NaN	NaN	9.2919	8.48362	107.22
TGVEG_205330;TGME49_205330;TGGT1_205330	hypothetical protein;putative transmembrane protein	N/A	8	-1.87391	+	+	4.4373e-16	8	12.1	0	0	4	2	8.89771	NaN	NaN	8.82345	8.09405	35.281
TGVEG_255410;TGME49_255410;TGGT1_255410	hypothetical protein;putative transmembrane protein	HMM: MSTLTANGAGAACATPVESA, NN: MSTLTANGAGAACATPVESA	2	-1.19781		+	4.1032e-12	5	10.3	0	0	1	1	9.13846	NaN	NaN	8.98887	8.60294	17.53
TGGT1_312150;TGVEG_312150;TGME49_312150	hypothetical protein;putative transmembrane protein	N/A	1	-0.950594			1.8253e-33	12	19.4	1	0	6	4	9.00941	NaN	NaN	8.89584	8.37125	60.669
TGVEG_215980;TGME49_215980;TGGT1_215980	hypothetical protein;putative transmembrane protein	N/A	1	-1.22706			3.599e-14	23	18.1	3	2	4	2	9.48237	8.38466	8.20785	9.27609	8.87173	24.466
TGVEG_216180;TGME49_216180;TGGT1_216180	hypothetical protein;putative transmembrane protein	HMM: MITVILCSVLFYSLGLVAPTSAA, NN: MITVILCSVLFYSLGLVAPTSAA	3	-0.979006			5.881e-11	11	21.8	0	1	3	3	9.05104	NaN	6.82451	8.86545	8.58485	16.441
TGVEG_301130;TGME49_301130;TGGT1_301130	hypothetical protein;putative transmembrane protein	HMM: MPCCATCCLLLSGFAIVFLLVFGA, NN: MPCCATCCLLLSGFAIVFLLVFGALMAN	2	-1.257			4.0333e-39	10	40.9	0	0	3	2	9.13972	NaN	NaN	8.99884	8.58228	13.507
TGGT1_308020;TGVEG_308020	hypothetical protein;SAG-related sequence SRS57	HMM: MQLWRRRAAGPASLGRQSLPLGCFFAAFGLCVLSAILGT, NN: MQLWRRRAAGPASLGRQSLPLGCFFAAFGLCVLSA	1	-1.86971		+	1.603e-161	56	53.2	3	1	14	8	10.4067	7.38721	7.45108	10.3008	9.73767	41.773
TGVEG_258826;TGME49_258826;TGGT1_258826	hypothetical protein;thioredoxin domain protein	HMM: MWRSSPLPRSFPRLLLALASLCCLYLP, NN: MWRSSPLPRSFPRLLLALASLCCLYLP;HMM: MWRSSPLPRSFPRLLLALASLCCLYLPPPPVYVHPC, NN: MWRSSPLPRSFPRLLLALASLCCLYLP	1	-0.972626			6.1023e-14	6	4.2	0	0	4	2	8.20847	NaN	NaN	8.11012	7.5152	111.84
TGVEG_271810;TGME49_271810;TGGT1_271810	lanp, putative;putative lanp	N/A	0	-1.54233			4.7356e-21	10	29.7	0	0	7	2	8.9221	NaN	NaN	8.82719	8.21508	31.931
TGVEG_257680;TGME49_257680;TGGT1_257680	myosin light chain MLC1	N/A	0	-1.2517			1.2671e-35	36	45.1	2	2	7	4	9.86401	7.59951	7.83418	9.7128	9.30999	24.124
TGVEG_309560;TGME49_309560;TGGT1_309560	nmda receptor glutamate-binding chain	N/A	7	-1.35777			1.0282e-19	11	14.7	0	0	3	3	9.44663	NaN	NaN	9.32781	8.82569	29.321
TGGT1_260850;TGVEG_260850	putative mitochondrial import inner membrane translocase subunit TIM10	N/A	0	-1.94632	+		1.9664e-58	5	34	0	0	2	2	8.68785	NaN	NaN	8.60856	7.91025	11.066
TGME49_310010;TGGT1_310010;TGVEG_310010B	rhoptry neck protein RON1	HMM: MARSSRAAPSGAFAHGVAKASFTWISGMKTPFGCVFFFCLIALWGFSAAL, NN: MARSSRAAPSGAFAHGVAKASFTWISGMKTPFGCVFFFCLIALWGFSAAL;N/A	0;1	-1.77666		+	1.0099e-204	24	14.3	0	0	8	4	9.24642	NaN	NaN	9.13682	8.59483	127.43
TGVEG_258660;TGME49_258660;TGGT1_258660	rhoptry protein ROP6	HMM: MRSSVGQSRLPLKFFLAPFSVKNSVFALFFVFALVCVSGL, NN: MRSSVGQSRLPLKFFLAPFSVKNSVFALFFVFALVCVSGL;HMM: MRSSVGQSRLPLKFFLAPFSVQNSVFALFFVFALVCVSGL, NN: MRSSVGQSRLPLKFFLAPFSVQNSVFALFFVFALVCVSGLSW	1;2	-1.16643		+	2.1195e-71	22	18.5	0	0	8	4	9.82845	NaN	NaN	9.69118	9.26141	51.403
TGVEG_300000;TGME49_300000;TGGT1_300000	ribosomal protein RPL18	N/A	0	-1.80747	+		1.0217e-27	32	40.6	5	2	8	6	9.66456	8.85566	8.13344	9.46486	8.92915	21.17
TGVEG_289530;TGME49_289530;TGGT1_289530	ribosomal protein RPL19	N/A	0	-1.49884			9.956e-23	23	28.9	5	2	4	4	9.52103	8.86794	8.09982	9.27117	8.76969	22.16
TGVEG_227600;TGME49_227600;TGGT1_227600	ribosomal protein RPL34	N/A	0	-1.40578			9.4836e-20	37	35.1	6	3	5	4	9.85849	8.97726	7.85757	9.62259	9.30203	15.383
TGVEG_203630;TGME49_203630;TGGT1_203630	ribosomal protein RPL44	N/A	0	-1.03106			1.2202e-18	12	28.6	4	2	3	2	9.16337	8.73272	7.9636	8.78559	8.33025	12.062
TGVEG_218410;TGME49_218410;TGGT1_218410	ribosomal protein RPP0	N/A	0	-1.0022			1.1502e-71	63	40.8	6	4	9	9	10.1531	8.63457	8.62117	9.92768	9.69127	34.157
TGVEG_212290;TGME49_212290;TGGT1_212290	ribosomal protein RPS19	N/A	0	-1.25095			2.1007e-41	22	23	1	2	7	3	9.54361	7.82731	8.04458	9.39721	8.91513	34.968
TGGT1_267140;TGME49_267140;TGGT1_367060;TGVEG_267140;TGME49_267160	SAG-related sequence protein SRS38D;SAG-related sequence SRS38B;SAG-related sequence SRS38D	HMM: MASVSLGSPAATKAAASASRPPVMGGVPVKLHLASRLGLVSLLLVATTAGLLGY, NN: MASVSLGSPAATKAAASASRPPVMGGVPVKLHLASRLGLVSLLLVATTAG;HMM: MASVSLGSPAVIKAAASASRPPVMRVVPVKLHLAFRLGLLSLLLVATMAGLLGY, NN: MASVSLGSPAVIKAAASASRPPVMRVVPVKLHLAFRLGLLSLLLVATMAG;HMM: MAYTIMVGEVSVAKARSSTTPCSLARVVKVRLSSASRLGCVTLLLLASATGL, NN: MAYTIMVGEVSVAKARSSTTPCSLARVVKVRLSSASRLGCVTLLLLASATGL;HMM: MAYTIMVGEVSVAKARSSTTPFSLARVVKVRLSSASRLGCVALLLL…	0;2	-1.7593		+	1.8884e-46	18	28.5	0	0	9	4	9.39636	NaN	NaN	9.3437	8.45393	41.017
TGME49_320180;TGGT1_320180;TGVEG_320180	SAG-related sequence protein SRS40D;SAG-related sequence SRS16C;SAG-related sequence SRS40D	HMM: MARSASMRQRLGGLGSKACKMMAVCMGGVLLLSTGNTAAE, NN: MARSASMRQRLGGLGSKACKMMAVCMGGVLLLSTGNTAAE;HMM: MARSASMRQRLGGLGSKARKMMAVCMGGVLLLSTGNGA, NN: MARSASMRQRLGGLGSKARKMMAVCMGGVLLLSTGNGAAE;HMM: MARSASMRQRLGGLGSKARKMMAVCMGGVLLLSTGNTAAE, NN: MARSASMRQRLGGLGSKARKMMAVCMGGVLLLSTGNTAAE;HMM: MVMMGSMQQRRGGLRSNARQLLAVCMSGVVFFSSGQAVAD, NN: MVMMGSMQQRRGGLRSNARQLLAVCMSGVVFFSSGQAVAD;HMM: MVMMMGSMQQRRGGLRSNARQLLAVCMS…	0;1	-3.06434		+	2.3221e-45	12	27.9	0	0	9	2	8.93504	NaN	NaN	8.90077	7.8152	42.345
TGVEG_319350;TGME49_319350;TGGT1_319350	SAG-related sequence SRS17B	HMM: MASQKVLVCLTVAGCLLATFHTFCASVSAASAG, NN: MASQKVLVCLTVAGCLLAT	2	-1.44511		+	1.3024e-108	28	33	0	0	8	5	9.76459	NaN	NaN	9.62455	9.20493	39.375
TGME49_301180;TGGT1_301180;TGVEG_301180	SAG-related sequence SRS19F	HMM: MLTAQTTRRVDGRIRPRVTAVMAICMGGVLLFSAGQVVAD, NN: MLTAQTTRRVDGRIRPRVTAVMAICMGGVLLFSAGQVVAD	1	-1.09057		+	2.7778e-25	10	22.5	0	0	6	3	8.87074	NaN	NaN	8.73164	8.30859	40.974
TGGT1_285870;TGME49_285870;TGVEG_285870	SAG-related sequence SRS20A	HMM: MVSCKRLAASRRQCLFFNACLFCLFICTVQIRAIAGA, NN: MVSCKRLAASRRQCLFFNACLFCLFICTVQIRAIAGA	1	-1.9273		+	8.907e-99	28	54.3	0	0	14	4	9.92042	NaN	NaN	9.85458	9.06867	34.955
TGGT1_233450;TGVEG_233450;TGME49_233450	SAG-related sequence SRS29A	N/A	1	-2.05014		+	1.1075e-94	23	38.1	0	0	13	4	9.69012	NaN	NaN	9.62151	8.85488	44.243
TGGT1_233460;TGVEG_233460;TGME49_233460	SAG-related sequence SRS29B	HMM: MSVSLHHFIISSGFLASMFPKAVRRAVTAGVFAAPTLMSFLRCGAMAS, NN: MSVSLHHFIISSGFLASMFPKAVRRAVTAGVFAAPTLMSFLRCGAMAS;HMM: MSVSLHHFIISSGFLTSMFPKAVRRAVTAGVFAAPTLMSFLRCGVMAS, NN: MSVSLHHFIISSGFLTSMFPKAVRRAVTAGVFAAPTLMSFLRCGVMAS	0	-1.28264		+	0	329	71.4	11	7	23	20	11.6212	8.99609	9.03579	11.4642	11.096	34.829
TGGT1_233480;TGVEG_233480;TGME49_233480	SAG-related sequence SRS29C	HMM: MATRASLARQKTGAACLAVLTASPSVVAAK, NN: MATRASLARQKTGAACLAVLTASPSVVAAKPWKRWVGVSVILASAFAVGVSAG	0	-1.93391		+	6.3182e-161	96	29.8	3	2	9	5	10.806	8.07148	8.19833	10.6848	10.1845	39.215
TGGT1_273130;TGME49_273130;TGVEG_273130	SAG-related sequence SRS30A	N/A	0	-1.35011		+	3.0473e-176	31	44.5	0	0	13	7	9.58937	NaN	NaN	9.5116	8.80405	38.496
TGVEG_271050;TGGT1_271050;TGME49_271050	SAG-related sequence SRS34A	HMM: MSFSKTTSLASLALTGLFVVFKFALAS, NN: MSFSKTTSLASLALTGLFVVFKFALAS	0	-1.42096		+	1.8312e-154	112	55.4	3	3	9	10	11.1818	8.24588	8.43748	11.0381	10.627	18.981
TGGT1_308840;TGVEG_308840;TGME49_308840	SAG-related sequence SRS51	N/A	0	-1.30184		+	8.7633e-183	86	28.9	1	0	8	8	10.4574	7.10544	NaN	10.3425	9.82212	38.038
TGGT1_315320;TGVEG_315320;TGME49_315320	SAG-related sequence SRS52A	HMM: MARISVVPIRLIMTGSLFFVVVVLMSTTALRAE, NN: MARISVVPIRLIMTGSLFFVVVVLMSTTALRAE;HMM: MARISVVPIRLITMGSLFFVVVVLMSTTALRAE, NN: MARISVVPIRLITMGSLFFVVVVLMSTTALRAE	1	-1.94913		+	8.4005e-206	49	59.6	0	0	14	10	10.2199	NaN	NaN	10.1407	9.44212	34.236
TGGT1_315410;TGVEG_315410;TGME49_315410	SAG-related sequence SRS53F	HMM: MDSTRRRMAGALFFVVAALMSPAVPRAETA, NN: MDSTRRRMAGALFFVVAALMSPAVPRAETA	0	-2.17875		+	5.445e-32	13	34.2	0	0	9	2	8.8344	NaN	NaN	8.76335	8.01313	34.139
TGGT1_315740	SAG-related sequence SRS54	N/A	0	-1.14787		+	1.5552e-15	8	19	0	0	5	2	8.74025	NaN	NaN	8.63037	8.08962	41.68
TGVEG_226860;TGGT1_226860	SAG-related sequence SRS67	HMM: MAFRKPLFSGRQWVALMCVFAAVGGK, NN: MAFRKPLFSGRQWVALMCVFAAVGGK;HMM: MGFRKPVFSGRQWVALMCVFAAVGGK, NN: MGFRKPVFSGRQWVALMCVFAAVGGK	1	-1.2351	+	+	1.4072e-60	14	44.3	0	0	6	3	9.27637	NaN	NaN	9.18344	8.56118	23.039
TGVEG_239890;TGME49_239890;TGGT1_239890	SCP family extracellular subfamily protein	HMM: MANKAVLALALLLCVASSALVQST, NN: MANKAVLALALLLCVASSALVQST	1	-3.35381		+	4.2605e-71	12	35.8	0	0	8	2	9.37048	NaN	NaN	9.33094	8.31008	26.623
TGGT1_204050;TGVEG_204050;TGME49_204050	subtilisin SUB1	HMM: MGSSHAIVACAALIVLLSTNARGL, NN: MGSSHAIVACAALIVLLSTNARGL	0	-1.0333	+	+	4.3081e-95	29	25.7	0	1	13	7	9.41996	NaN	7.02011	9.27443	8.86825	85.096
TGVEG_247350;TGME49_247350;TGGT1_247350	thioredoxin domain-containing protein	HMM: MPQAKTPTAVLSLANVFFSTFIAVSGD, NN: MPQAKTPTAVLSLANVFFSTFIAVSGD	4	-1.07083			3.3784e-19	17	25.3	0	0	5	3	9.9713	NaN	NaN	9.79905	9.48639	33.676

## Sheet: Selection N3-biotin
Protein IDs	Protein names	Signal Peptide	# TM Domains	Log2 FC YnMyr/Myr	Log2 FC YnMyr base/Myr base	Log2 FC YnMyr base/YnMyr	MG motif	PEP	MS/MS Count	Sequence coverage [%]	Razor + unique peptides Myr	Razor + unique peptides Myr base	Razor + unique peptides YnMyr	Razor + unique peptides YnMyr base	Intensity	Intensity Myr	Intensity Myr base	Intensity YnMyr	Intensity YnMyr base	Mol. weight [kDa]
TGVEG_267080;TGGT1_267080;TGME49_267080	26S protease regulatory subunit 4, putative;putative 26S protease regulatory subunit 4	N/A	0	7.20618	8.11477	0.56498	+	1.3968e-218	154	65.5	0	0	28	27	10.7156	NaN	NaN	10.3027	10.503	49.134
TGVEG_276140;TGGT1_276140;TGME49_276140	ADP ribosylation factor ARF1	N/A	0	9.59178	9.37575	-0.358608	+	5.3766e-68	80	57.9	1	1	8	7	10.9274	7.24895	7.40099	10.6443	10.6067	21.062
TGVEG_291800;TGME49_291800;TGGT1_291800	ADP-ribosylation factor family protein	N/A	0	5.46418	3.86242	-0.562393	+	2.2941e-62	25	49.5	0	0	8	7	9.49415	NaN	NaN	9.31345	9.02612	22.39
TGGT1_262490;TGVEG_262490;TGME49_262490	alpha/beta hydrolase, putative;putative alpha/beta hydrolase	N/A	0	4.17556	4.04853	0.101419	+	2.7026e-40	21	41.5	0	0	8	6	9.44915	NaN	NaN	9.13988	9.15622	29.068
TGVEG_261440;TGME49_261440;TGGT1_261440	ARM repeats containing protein	N/A	0	5.4058	5.94844	0.291391	+	7.5898e-153	58	39.1	0	0	12	12	10.3099	NaN	NaN	9.94569	10.064	30.509
TGVEG_228750;TGME49_228750;TGGT1_228750	calcium dependent protein kinase CDPK7	N/A	0	2.27256	2.99309	0.656139	+	1.7592e-23	10	3.6	0	0	5	4	9.00173	NaN	NaN	8.64966	8.74638	219.34
TGVEG_301440;TGME49_301440;TGGT1_301440	calcium-dependent protein kinase CDPK1	N/A	0	8.86391	10.4449	0.538238	+	0	194	56.5	4	2	26	27	11.1277	7.91355	7.56957	10.7273	10.9068	65.421
TGVEG_305860;TGME49_305860;TGGT1_305860	calcium-dependent protein kinase CDPK3	N/A	0	9.2763	8.7304	0.413425	+	5.5977e-233	154	62.2	0	0	31	28	10.7837	NaN	NaN	10.4487	10.5142	60.429
TGVEG_242070;TGME49_242070;TGGT1_242070	cAMP-dependent protein kinase regulatory subunit	N/A	0	6.92181	9.90313	-0.476776	+	1.2432e-209	253	60.3	4	1	26	23	11.2552	8.08282	7.40724	11.0458	10.8362	42.796
TGVEG_240550;TGME49_240550;TGGT1_240550	copper chaperone COX17-1, putative;putative copper chaperone COX17-1	N/A	0	2.95329	2.88353	0.270874	+	9.235e-12	8	28.6	0	0	1	2	8.923	NaN	NaN	8.55175	8.68239	8.1951
TGVEG_223940;TGGT1_223940;TGME49_223940	GAP45;GAP45 protein	N/A	0	7.75895	9.09334	-0.262016	+	0	160	75.9	4	4	22	26	11.3454	8.09181	7.7265	11.087	10.9963	27.318
TGGT1_233030;TGVEG_233030;TGME49_233030	gliding-associated protein GAP70	N/A	0	5.48676	5.79146	0.0546589	+	3.8536e-74	48	55.5	0	0	16	15	9.86932	NaN	NaN	9.54508	9.59031	38.66
TGVEG_285980;TGME49_285980;TGGT1_285980B	glucosephosphate-mutase GPM1	N/A	0	8.14958	9.10292	0.448704	+	0	192	61.2	1	1	30	28	10.8467	6.76675	7.39157	10.4919	10.5932	70.572
TGVEG_261980;TGGT1_261980	gorasp2-prov protein	N/A	0	4.39607	2.85291	-0.402504	+	1.0804e-55	9	10.9	0	0	3	3	9.15005	NaN	NaN	8.8	8.89306	50.485
TGGT1_235490;TGME49_235490;TGVEG_235490	high-temperature-induced dauer-formation protein;hypothetical protein	N/A	1	5.16563	6.46716	0.651186	+	7.3897e-221	87	31.6	0	0	20	21	10.0685	NaN	NaN	9.6305	9.87143	102.12
TGGT1_261500;TGVEG_261500;TGME49_261500	hydrolase	N/A	0	7.57004	7.27113	-0.0259457	+	1.9472e-167	55	38.7	0	0	15	12	10.5388	NaN	NaN	10.2465	10.2289	53.149
TGVEG_203160;TGME49_203160;TGGT1_203160	hypothetical protein	N/A	0	2.08175	2.45261	0.168304	+	3.3178e-13	11	9.6	0	0	4	5	8.79892	NaN	NaN	8.38584	8.58688	74.801
TGME49_211630;TGGT1_211630;TGVEG_211630	hypothetical protein	N/A	0	5.24022	4.47835	-0.303617	+	5.8606e-185	39	66.2	0	0	13	10	9.85885	NaN	NaN	9.64551	9.44782	23.612
TGVEG_214575;TGME49_214575;TGGT1_214575	hypothetical protein	N/A	0	7.50237	8.29493	-0.347672	+	2.8056e-53	49	58.7	0	0	5	4	10.4278	NaN	NaN	10.1912	10.0511	10.282
TGVEG_219710;TGGT1_219710;TGME49_219710	hypothetical protein	N/A	0	4.79261	3.73434	0.199072	+	2.6661e-126	47	15.6	0	0	17	16	9.54987	NaN	NaN	9.17211	9.31404	199.78
TGVEG_232280;TGGT1_232280;TGME49_232280	hypothetical protein	N/A	0	7.90997	7.32328	-0.18511	+	1.9904e-230	92	73.1	0	0	14	16	10.6052	NaN	NaN	10.3033	10.3051	30.148
TGGT1_242570;TGVEG_242570;TGME49_242570	hypothetical protein	N/A	0	5.01098	5.7776	0.0139046	+	1.6123e-199	54	30.3	0	0	20	17	9.68993	NaN	NaN	9.40951	9.36726	94.837
TGVEG_249970;TGME49_249970;TGGT1_249970	hypothetical protein	N/A	0	4.81432	8.12722	-0.123591	+	1.9148e-145	76	56.8	3	0	10	12	10.5261	8.10921	NaN	10.2602	10.1831	24.712
TGVEG_264990;TGME49_264990;TGGT1_264990	hypothetical protein	N/A	0	4.46616	5.33605	0.190428	+	2.003e-38	30	43.2	0	0	10	8	9.60248	NaN	NaN	9.34512	9.2529	29.069
TGGT1_269990;TGVEG_269990;TGME49_269990	hypothetical protein	N/A	0	2.19996	2.53955	0.388124	+	2.9616e-49	16	6.3	0	0	5	9	8.98784	NaN	NaN	8.47819	8.82714	216.02
TGVEG_277870;TGME49_277870;TGGT1_277870	hypothetical protein	N/A	0	2.06721	4.7673	0.536724	+	2.6059e-96	17	27.1	0	0	8	7	9.20472	NaN	NaN	8.83095	8.96597	57.918
TGVEG_310420;TGME49_310420;TGGT1_310420	hypothetical protein	N/A	0	5.58529	5.5539	-0.202726	+	3.0616e-19	16	23.8	0	0	1	3	10.0429	NaN	NaN	9.77776	9.70278	22.925
TGVEG_313380;TGME49_313380;TGGT1_313380	hypothetical protein	N/A	0	8.76468	9.82875	-0.0978355	+	0	200	84.7	3	1	22	20	11.1305	8.07335	7.53405	10.8437	10.8136	31.512
TGVEG_319510;TGME49_319510;TGGT1_319510	hypothetical protein	N/A	0	5.08867	6.08021	-0.267351	+	1.3106e-92	42	52.5	0	0	9	8	9.97895	NaN	NaN	9.74875	9.59325	29.924
TGVEG_320760;TGME49_320760;TGGT1_320760	hypothetical protein	N/A	0	5.01801	6.22107	-0.136614	+	4.39e-109	40	42.6	0	0	14	12	9.92401	NaN	NaN	9.67944	9.55806	39.389
TGVEG_293470;TGME49_293470;TGGT1_293470	hypothetical protein;immune mapped protein 1	N/A	0	6.77292	6.98119	-0.0210953	+	2.1662e-174	80	62	0	0	19	20	10.3688	NaN	NaN	10.0729	10.0625	43.492
TGVEG_238150;TGME49_238150;TGGT1_238150	hypothetical protein;putative transmembrane protein	N/A	8	3.53964	2.95836	-0.372015	+	3.6539e-21	9	13.8	0	0	4	3	8.98141	NaN	NaN	8.7623	8.57933	37.062
TGVEG_246580;TGME49_246580;TGGT1_246580	hypothetical protein;putative transmembrane protein	HMM: MGECAILAICLVVFFAVLMSF, NN: MGECAILAICLVVFFAVLMSFDYRDGI	1	2.42768	3.23861	-0.560402	+	1.2326e-47	12	26.1	0	0	7	3	9.01674	NaN	NaN	8.88359	8.43845	42.82
TGVEG_260820;TGME49_260820;TGGT1_260820	IMC sub-compartment protein ISP1	N/A	0	7.50727	8.58606	-0.12915	+	4.4866e-197	70	55.1	0	0	11	11	10.7849	NaN	NaN	10.5037	10.4631	19.413
TGVEG_237820;TGME49_237820;TGGT1_237820	IMC sub-compartment protein ISP2	N/A	0	7.23491	7.07359	-0.618135	+	1.1132e-192	55	58.1	0	0	9	7	10.4436	NaN	NaN	10.248	10.003	17.397
TGVEG_316540;TGME49_316540;TGGT1_316540	IMC sub-compartment protein ISP3	N/A	0	7.37717	9.35113	0.142536	+	3.4067e-75	97	58.5	0	0	9	8	10.8136	NaN	NaN	10.5158	10.5093	18.39
TGGT1_243800;TGVEG_243800;TGME49_243800	long-chain fatty acid CoA ligase, putative;putative long-chain fatty acid CoA ligase	N/A	0	9.0939	7.69207	0.221092	+	0	248	60.3	1	0	38	38	10.9493	6.97489	NaN	10.6035	10.6888	83.507
TGGT1_292120;TGVEG_292120;TGME49_292120	membrane occupation and recognition nexus protein MORN2	N/A	0	6.62081	7.64127	-0.123476	+	4.4969e-239	64	71.6	0	0	22	18	10.1527	NaN	NaN	9.90098	9.79616	49.281
TGVEG_261780;TGME49_261780;TGGT1_261780	microneme protein MIC7	N/A	1	7.06448	6.8101	-0.8021	+	2.3897e-299	53	55	0	0	13	10	10.314	NaN	NaN	10.1569	9.7963	36.34
TGGT1_207830;TGVEG_207830;TGME49_207830	MORN repeat-containing protein	N/A	0	6.51792	6.37093	-0.184921	+	1.5507e-145	66	65.8	0	0	18	17	10.0352	NaN	NaN	9.80231	9.6533	39.833
TGVEG_297150;TGME49_297150;TGGT1_297150	MORN repeat-containing protein	N/A	0	2.16873	2.32805	-0.109768	+	3.1946e-21	14	17.2	0	0	6	6	8.94339	NaN	NaN	8.61087	8.67171	50.295
TGGT1_313290;TGVEG_313290;TGME49_313290	MORN repeat-containing protein	N/A	0	7.54299	6.40669	-0.301386	+	5.9747e-261	93	62.2	0	0	22	20	10.2405	NaN	NaN	10.0184	9.84303	46.04
TGVEG_290200;TGME49_290200;TGGT1_290200	NAD/NADP octopine/nopaline dehydrogenase, alpha-helical domain-containing protein	HMM: MGAPSPVAAGVAARTKSPLLTVCVCGGGNSAHAVAA, NN: MGAPSPVAAGVAARTKSPLLTV	0	3.70152	2.57454	0.203312	+	3.2042e-30	16	29.2	1	0	6	9	9.21511	6.91876	NaN	8.66807	9.06711	48.099
TGVEG_245710;TGME49_245710;TGGT1_245710	phosphatidylinositol-4-phosphate 5-kinase, putative;putative phosphatidylinositol-4-phosphate 5-kinase	N/A	0	5.0055	6.13193	0.0573006	+	2.2021e-67	34	37.4	0	0	11	10	9.72942	NaN	NaN	9.44501	9.41111	31.258
TGGT1_281580;TGVEG_281580;TGME49_281580	PP2C, putative;putative PP2C	N/A	0	4.17379	3.10722	0.138824	+	5.8772e-63	22	25.9	0	0	11	10	9.19871	NaN	NaN	8.8804	8.91428	71.856
TGVEG_311360;TGME49_311360;TGGT1_311360	protein kinase G AGC kinase family member PKG	N/A	0	4.34959	6.128	0.462471	+	9.7789e-139	50	27.9	0	0	16	22	9.76678	NaN	NaN	9.30878	9.5808	111.24
TGVEG_213800;TGME49_213800;TGGT1_213800	protein phosphatase 2b regulatory subunit, putative;putative protein phosphatase 2b regulatory subunit	N/A	0	7.26315	7.96707	0.752085	+	3.8659e-223	76	87.6	0	0	13	9	10.5265	NaN	NaN	10.215	10.2356	19.994
TGGT1_232340;TGVEG_232340;TGME49_232340	protein phosphatase 2C domain-containing protein	N/A	0	8.33124	9.70666	0.240341	+	0	186	62	0	0	36	39	10.9304	NaN	NaN	10.5894	10.666	60.027
TGGT1_267100;TGVEG_267100;TGME49_267100	protein phosphatase 2C domain-containing protein	N/A	0	2.43151	3.72246	0.417112	+	1.3325e-68	26	17.5	0	0	10	12	9.37171	NaN	NaN	8.93656	9.17301	96.722
TGVEG_271380;TGGT1_271380;TGME49_271380	PUB domain-containing protein	N/A	0	2.8129	3.65198	0.013485	+	1.4889e-52	18	15.1	0	0	9	6	8.93914	NaN	NaN	8.71511	8.54446	107.69
TGME49_207460;TGVEG_207460B;TGGT1_207460B	Rab5B protein	N/A	0	4.9649	5.19644	-0.044241	+	5.9413e-112	35	52.6	0	0	9	9	9.8224	NaN	NaN	9.56141	9.47727	24.677
TGVEG_267440;TGME49_267440;TGGT1_267440	RING zinc finger protein	N/A	0	2.75537	2.47856	-0.157453	+	1.4407e-25	11	24.2	0	0	5	7	9.08271	NaN	NaN	8.73137	8.82679	41.492
TGVEG_299970;TGME49_299970	tetratricopeptide repeat-containing protein	N/A	0	3.89704	3.78397	-0.0695152	+	6.7097e-70	20	30	0	0	9	7	9.40176	NaN	NaN	9.17032	9.01783	46.498
TGVEG_209450;TGME49_209450;TGGT1_209450	TLD protein	N/A	0	4.27087	3.32851	0.285858	+	3.1501e-90	31	17.1	0	0	9	11	9.4627	NaN	NaN	9.11458	9.20415	92.271
TGGT1_262390;TGVEG_262390;TGME49_262390	TLD protein	N/A	0	3.96758	4.01169	0.390192	+	6.2091e-24	14	6.8	0	0	6	8	9.1433	NaN	NaN	8.70252	8.94784	148.06
TGGT1_285190;TGVEG_285190;TGME49_285190	zinc finger, C3HC4 type (RING finger) domain-containing protein	N/A	0	4.65617	4.0935	-0.488495	+	1.9187e-72	21	15.4	0	0	9	7	9.55837	NaN	NaN	9.34633	9.14529	69.997

## Sheet: Proteome
Protein IDs	Protein names	Signal Peptide	# TM Domains	Average (-/+ base) Log2 FC YnMyr/Myr	LFQ intensity Myr	LFQ intensity Myr base	LFQ intensity YnMyr	LFQ intensity YnMyr base	N3-biotin	Base sensitive	PEP	MS/MS Count	Sequence coverage [%]	Razor + unique peptides Myr	Razor + unique peptides Myr base	Razor + unique peptides YnMyr	Razor + unique peptides YnMyr base	Intensity	Intensity Myr	Intensity Myr base	Intensity YnMyr	Intensity YnMyr base	Mol. weight [kDa]
TGGT1_243800;TGME49_243800;TGVEG_243800	long-chain fatty acid CoA ligase, putative;putative long-chain fatty acid CoA ligase	N/A	0	0.117904	28.8339	29.3891	29.1234	29.3354	+		3.4511e-85	50	30.5	11	13	14	9	9.47072	8.71276	8.98331	9.01724	8.64072	83.507
TGME49_232340;TGVEG_232340;TGGT1_232340	protein phosphatase 2C domain-containing protein	N/A	0	-0.540832	28.6864	28.5698	28.071	28.1035	+		1.6163e-24	18	21.1	8	5	7	4	9.21136	8.73897	8.61016	8.67068	8.30688	59.867
TGVEG_223940;TGGT1_223940;TGME49_223940	GAP45;GAP45 protein	N/A	0	-0.456693	30.2287	29.9366	29.7961	29.4558	+		4.7783e-67	40	42.4	7	7	8	7	9.67221	9.11965	9.08041	9.14789	8.88926	27.318
TGVEG_232280;TGME49_232280;TGGT1_232280	hypothetical protein	N/A	0	-0.296837	27.3861	27.8024	27.1989	27.3959	+		4.0122e-24	12	29.5	4	5	2	2	8.93706	8.315	8.65011	8.03439	8.01494	30.148
TGVEG_235490;TGME49_235490;TGGT1_235490	high-temperature-induced dauer-formation protein;hypothetical protein	N/A	1	NaN	NaN	26.1958	NaN	NaN	+		1.288e-07	4	5.7	1	3	0	2	8.25741	7.46238	7.97915	NaN	7.75262	101.97
TGVEG_237820;TGME49_237820;TGGT1_237820	IMC sub-compartment protein ISP2	N/A	0	NaN	NaN	NaN	25.4141	NaN	+		0.00016142	3	6.9	1	1	1	0	8.34782	7.90553	7.90389	7.79343	NaN	17.397
TGVEG_238150;TGME49_238150;TGGT1_238150	hypothetical protein;putative transmembrane protein	N/A	8	NaN	NaN	NaN	NaN	24.6865	+		6.2535e-07	4	4	1	1	1	1	8.25227	7.89107	7.51917	7.5867	7.46663	37.062
TGVEG_242070;TGME49_242070;TGGT1_242070	cAMP-dependent protein kinase regulatory subunit	N/A	0	-0.520909	30.5522	30.8871	30.1885	30.2091	+		1.3443e-44	80	31.4	11	13	12	13	9.85514	9.16658	9.38719	9.24778	9.17269	42.796
TGVEG_246580;TGME49_246580;TGGT1_246580	hypothetical protein;putative transmembrane protein	HMM: MGECAILAICLVVFFAVLMSF, NN: MGECAILAICLVVFFAVLMSFDYRDGI	1	0.515528	25.8875	26.6082	26.6217	26.9051	+		1.4939e-16	11	13.8	2	2	3	4	8.6701	7.62293	7.93458	8.18991	8.26717	42.82
TGVEG_249970;TGME49_249970;TGGT1_249970	hypothetical protein	N/A	0	-0.609853	27.7582	27.2184	26.8784	NaN	+		5.4748e-31	10	27.1	4	3	3	1	8.77888	8.41744	8.1303	8.27717	7.1825	24.712
TGVEG_260820;TGME49_260820;TGGT1_260820	IMC sub-compartment protein ISP1	N/A	0	NaN	28.1017	NaN	NaN	NaN	+		1.4793e-09	4	21	2	2	0	0	8.64364	8.45947	8.18224	NaN	NaN	19.413
TGVEG_261440;TGME49_261440;TGGT1_261440	ARM repeats containing protein	N/A	0	NaN	NaN	NaN	25.049	NaN	+		9.5793e-07	4	4.4	1	1	1	1	8.33564	8.04269	7.76351	7.68353	NaN	30.509
TGVEG_267080;TGME49_267080;TGGT1_267080	26S protease regulatory subunit 4, putative;putative 26S protease regulatory subunit 4	N/A	0	-0.432392	28.1551	28.0035	27.6749	27.6189	+		3.7759e-34	11	23.8	6	4	2	2	9.04852	8.61055	8.63428	8.08447	8.19871	49.134
TGVEG_276140;TGGT1_276140;TGME49_276140	ADP ribosylation factor ARF1	N/A	0	-0.463539	29.5245	29.5912	29.1323	29.0564	+		2.8973e-44	27	63.4	6	5	3	4	9.49541	8.99121	9.02531	8.739	8.73296	21.062
TGVEG_285980;TGME49_285980;TGGT1_285980B	glucosephosphate-mutase GPM1	N/A	0	-0.58215	27.9468	NaN	27.3646	NaN	+		3.7398e-39	15	23.2	4	4	4	4	9.03427	8.43099	8.57965	8.35187	8.31731	70.572
TGVEG_290200;TGME49_290200;TGGT1_290200	NAD/NADP octopine/nopaline dehydrogenase, alpha-helical domain-containing protein	HMM: MGAPSPVAAGVAARTKSPLLTVCVCGGGNSAHAVAA, NN: MGAPSPVAAGVAARTKSPLLTV	0	-0.0344458	30.414	30.5506	30.394	30.5017	+		2.7957e-56	59	34.3	9	9	10	10	9.84539	9.14696	9.22717	9.33508	9.24343	48.099
TGVEG_293470;TGME49_293470;TGGT1_293470	hypothetical protein;immune mapped protein 1	N/A	0	NaN	26.9085	NaN	NaN	NaN	+		5.2761e-11	4	9.5	2	2	1	0	8.45043	8.10027	8.06393	7.60514	NaN	43.492
TGVEG_301440;TGME49_301440;TGGT1_301440	calcium-dependent protein kinase CDPK1	N/A	0	-0.2694	30.5995	31.0523	30.4906	30.6224	+		6.832e-74	73	25.6	15	14	11	13	9.91413	9.32773	9.4567	9.22298	9.18918	65.421
TGVEG_305860;TGME49_305860;TGGT1_305860	calcium-dependent protein kinase CDPK3	N/A	0	-0.223176	27.6567	27.8523	27.5562	27.5065	+		2.5534e-44	21	27.9	5	7	5	5	8.99703	8.27598	8.46288	8.43339	8.38525	60.429
TGVEG_310420;TGME49_310420;TGGT1_310420	hypothetical protein	N/A	0	NaN	NaN	NaN	NaN	25.4984	+		2.7885e-05	3	11.9	1	1	0	1	8.39919	7.92539	8.06104	NaN	7.71105	22.925
TGVEG_311360;TGME49_311360;TGGT1_311360	protein kinase G AGC kinase family member PKG	N/A	0	NaN	NaN	NaN	27.0407	27.4652	+		1.5317e-11	7	4.9	1	2	2	3	8.81088	7.65052	8.32619	8.25583	8.32238	111.24
TGVEG_313380;TGME49_313380;TGGT1_313380	hypothetical protein	N/A	0	-1.04224	30.2062	30.2618	29.1578	29.2258	+		1.9198e-83	31	43.1	7	7	4	5	9.63508	9.12548	9.2565	8.77987	8.75862	31.512
TGVEG_316540;TGME49_316540;TGGT1_316540	IMC sub-compartment protein ISP3	N/A	0	-0.447137	29.1849	28.6911	28.5922	28.3895	+		8.1862e-13	13	37.8	5	2	3	3	9.31528	8.85734	8.63183	8.74335	8.56173	18.39
TGGT1_201680;TGVEG_201680;TGME49_201680	eukaryotic initiation factor-3 subunit 10, putative;putative eukaryotic initiation factor-3 subunit 10	N/A	0	-0.135354	31.3444	31.5168	31.2695	31.321			4.3093e-162	120	38.9	27	33	27	24	10.1193	9.37515	9.65242	9.53931	9.45264	118.85
TGGT1_202870;TGVEG_202870;TGME49_202870	SAP domain-containing protein	HMM: MLALLLSLSSVVWFFLFLVTSK, NN: MLALLLSLSSVVWFFLFLVTSK;N/A	1;2	-0.293489	27.1826	NaN	26.8891	NaN			7.3895e-13	8	13.7	4	1	2	1	8.60271	8.2398	7.75949	8.15552	7.42088	42.345
TGGT1_203310;TGME49_203310;TGVEG_203310	dense granule protein GRA7	HMM: MARHAIFFALCVLGLVAAALPQFATAA, NN: MARHAIFFALCVLGLVAAALPQFATAA;HMM: MARHAIFSALCVLGLVAAALPQFATAA, NN: MARHAIFSALCVLGLVAAALPQFATAA	2	-0.215832	34.2455	34.2032	34.0479	33.9691			1.981e-285	186	59.7	14	15	15	15	10.9535	10.3133	10.3789	10.4054	10.2994	25.857
TGGT1_204050;TGVEG_204050;TGME49_204050	subtilisin SUB1	HMM: MGSSHAIVACAALIVLLSTNARGL, NN: MGSSHAIVACAALIVLLSTNARGL	0	0.165374	29.0578	29.6045	29.3806	29.6124		+	4.7364e-50	40	21.5	10	7	9	6	9.53493	8.84636	8.98634	9.01089	8.86373	85.096
TGGT1_204130;TGVEG_204130;TGME49_204130	perforin-like protein PLP1	N/A	0	0.349188	26.5077	27.188	27.1889	27.2053			1.4445e-15	15	5.9	4	4	3	3	8.81239	8.19756	8.31201	8.18619	8.12372	125.49
TGGT1_204160;TGVEG_204160;TGME49_204160	GYF domain-containing protein	N/A	0	NaN	27.6306	NaN	NaN	NaN			2.3826e-08	5	2.9	3	2	0	0	8.38115	8.31765	7.51483	NaN	NaN	187.53
TGGT1_204310;TGVEG_204310;TGME49_204310	hypothetical protein;putative transmembrane protein	N/A	2	NaN	NaN	23.7023	NaN	NaN			0.00012537	2	1.3	1	1	0	0	7.6695	7.47413	7.22855	NaN	NaN	242.42
TGGT1_205250	rhoptry protein ROP18	HMM: MFSVQRPPLTRTVVRMGLATLLPKTACLAGLNVALVFLLFQVQDGTGI, NN: MFSVQRPPLTRTVVRMGLATLLPKTACLAGLNVALVFLLFQVQDGTGI;HMM: MFSVQRPPLTRTVVRMGLATLLPKTACLAVLNVALVFLLFQVQDGTGI, NN: MFSVQRPPLTRTVVRMGLATLLPKTACLAVLNVALVFLLFQVQDGTGI	0;1	-0.0454407	31.6475	31.6614	31.6756	31.5424			1.2897e-156	94	29.8	14	15	16	15	10.2069	9.54082	9.65292	9.68715	9.51379	62.342
TGGT1_205510;TGVEG_205510;TGME49_205510	nucleolar protein 5, putative;putative nucleolar protein 5	N/A	0	-0.133823	29.4602	29.2284	29.1411	29.2798			2.1106e-55	41	34.5	10	9	10	10	9.48571	8.85813	8.86913	8.95022	8.84946	54.334
TGGT1_206510;TGME49_206510;TGVEG_206510	toxolysin TLN4	HMM: MRRPCLFRSTFLLLLALLPLFSLLSESI, NN: MRRPCLFRSTFLLLLALLPLFSLLSESI;N/A	0;1	-0.374641	27.7065	27.4212	27.4433	26.9351			2.8206e-38	16	5.7	4	7	5	4	8.92443	8.2204	8.48282	8.32703	8.19835	256.82
TGGT1_207620;TGVEG_207620;TGME49_207620	pyridine nucleotide-disulfide oxidoreductase domain-containing protein	HMM: MASLRSQAWRRVAQRAFSHLSSSSPLFSSGLQGLPAAVSV, NN: MASLRSQAWRRVAQRAFSHLSSSS;HMM: MASLRSQAWRRVAQRAFSHLSSSSPLLSSGLQGL, NN: MASLRSQAWRRVAQRAFSHLSSSS	0	-0.121718	29.4874	29.4659	29.3005	29.4093			1.2206e-59	42	17.3	7	8	7	7	9.52502	8.89049	9.00527	8.90777	8.87611	71.248
TGGT1_207640;TGVEG_207640;TGME49_207640	isoleucyl-tRNA synthetase family protein	N/A	0	0.319015	27.6094	28.2662	28.671	27.8425			3.3708e-39	28	12.9	4	8	7	7	9.16343	8.11247	8.65897	8.71457	8.54787	141.42
TGGT1_207690	programmed cell death 5 protein	N/A	0	NaN	NaN	NaN	NaN	25.2822			5.7689e-08	1	19.7	0	0	0	1	7.64597	NaN	NaN	NaN	7.64597	13.608
TGGT1_208530;TGVEG_208530;TGME49_208530	nicotinate phosphoribosyltransferase	N/A	0	-0.0274019	26.5345	26.8599	26.5494	26.7903			3.2673e-16	11	9	3	3	2	3	8.69338	8.19237	8.01741	8.03487	8.0984	65.563
TGGT1_208830;TGVEG_208830;TGME49_208830	hypothetical protein	HMM: MYRNHSGIRLACRLFEVGALVLALENVSGI, NN: MYRNHSGIRLACRLFEVGALVLAL	0	-0.00937462	28.5577	28.8062	28.459	28.8862			6.1693e-67	32	32.3	8	7	9	5	9.30982	8.62063	8.78822	8.74882	8.65178	54.896
TGGT1_209150;TGVEG_209150;TGME49_209150	non-proton pumping type-II NADH dehydrogenase I	HMM: MAGQWLRLLAGASVPMLSLPARCD, NN: MAGQWLRLLAGASVPMLSLPARCD	0	NaN	27.3569	NaN	NaN	NaN			1.3588e-21	7	12.8	4	0	1	2	8.40919	8.23525	NaN	7.50757	7.72014	67.039
TGGT1_209850;TGVEG_209850A;TGME49_209850	RNA recognition motif-containing protein	N/A	0	NaN	NaN	26.3897	NaN	NaN			1.6019e-06	4	2.3	1	2	1	0	8.30404	7.59243	8.03751	7.72632	NaN	170.99
TGGT1_209950;TGVEG_209950;TGME49_209950	putative thioredoxin;thioredoxin, putative	HMM: MAPLRVCAFLPLVCFAFLSLAAGA, NN: MAPLRVCAFLPLVCFAFLSLAAGA	0	-0.0340824	32.032	32.087	32.0152	32.0356			1.3637e-111	151	64.4	20	22	23	23	10.3316	9.66008	9.75144	9.7797	9.71793	47.686
TGGT1_209985;TGVEG_209985;TGGT1_410590;TGGT1_210095;TGVEG_442260;TGVEG_210095;TGME49_209985	cAMP-dependent protein kinase;hypothetical protein;putative transmembrane protein	HMM: ADLTERSLKVACIKMRTSVALFFAALGSISLPCTLHVSLAA, NN: ADLTERSLKVACIKMRTSVALFFAALGSISLPCTLHVSLAA;HMM: MRTSVALFFAAAGGISLVCAPQVSLAA, NN: MRTSVALFFAAAGGISLVCAPQVSLAA;HMM: MRTSVALFFAALGSISLPCTLHVSLAA, NN: MRTSVALFFAALGSISLPCTLHVSLAA;N/A	0;1	NaN	25.1946	NaN	NaN	NaN			2.5592e-06	4	9.1	2	1	1	0	7.98641	7.58434	7.57392	7.3228	NaN	29.666
TGGT1_211290	rhoptry protein ROP15	HMM: MLKTTPAFFLFLTWMFPRCDGF, NN: MLKTTPAFFLFLTWMFPRCDGF	0	-0.0291443	28.9425	28.2109	28.5788	28.5163			9.0983e-46	21	28.8	7	4	5	4	9.26665	8.84078	8.49607	8.73508	8.47426	36.589
TGGT1_214080	thioredoxin-dependent peroxidase TPX1/2;toxofilin	HMM: MAQYKSRPLAAFLLLITVGSLLTASESV, NN: MAQYKSRPLAAFLLLITVGSLLTA;HMM: MAQYKSRPLAAVLLLITVGSLLTASESV, NN: MAQYKSRPLAAVLLLITVGSLLTA;HMM: MLPLCASSQMYLGQECLSCPVLPRLCLATCLGA, NN: MLPLCASSQMYLGQECLSCPVLPRLCLAT	0;1	-0.0565147	33.0939	32.8895	33.0891	32.7813			7.863e-214	139	69.4	15	16	16	15	10.607	9.95387	10.0219	10.1021	9.91886	27.131
TGGT1_216650;TGVEG_216650;TGME49_216650	S15 sporozoite-expressed protein	N/A	0	-0.0673141	30.3417	29.8512	30.0247	30.0335			3.8855e-33	47	31.5	8	7	9	8	9.72396	9.18475	9.01649	9.25183	8.97383	45.118
TGGT1_216670;TGVEG_216670;TGME49_216670	FUSE-binding protein 2 / KH-type splicing regulatory protein	N/A	0	-0.221145	31.5671	31.5362	31.3436	31.3174			0	128	56.4	29	33	26	24	10.1406	9.47296	9.69071	9.52883	9.40919	100.05
TGGT1_217540;TGVEG_217540;TGME49_217540	RNA recognition motif-containing protein	N/A	0	NaN	28.0405	NaN	NaN	NaN			5.7792e-10	5	13.4	3	2	0	0	8.60179	8.44102	8.0923	NaN	NaN	38.116
TGGT1_217680;TGVEG_217680;TGME49_217680	hypothetical protein	N/A	0	-0.795049	27.6159	28.141	27.4186	26.7482			3.5137e-54	25	8.1	7	8	7	3	8.96786	8.46659	8.44548	8.41792	7.97854	243.03
TGGT1_217740;TGVEG_217740;TGME49_217740	3-ketoacyl-(acyl-carrier-protein) reductase	HMM: METPVSVQTARRPSPSRSLNLLTLALSLFFAPTVSAR, NN: METPVSVQTARRPSPSRSLNLLTLALSLFFAPTVSAR;HMM: METPVSVQTARRPSSSRSLNLLTLALSLFFAPTVSAR, NN: METPVSVQTARRPSSSRSLNLLTLALSLFFAPTVSAR	0	-0.348771	28.4134	28.3093	27.875	28.1502			1.5625e-41	14	24.5	5	4	4	3	9.15616	8.62219	8.54776	8.58892	8.43554	39.01
TGGT1_220240;TGVEG_220240	hypothetical protein;putative transmembrane protein	HMM: MEVRHRSVQLFWVVGLLGFLIYVVSLHGSPVNAA, NN: MEVRHRSVQLFWVVGLLGFLIYVVSLHGS	2	-0.211754	30.614	30.2575	30.3216	30.1264			1.5317e-108	47	31.9	10	12	11	8	9.80827	9.20911	9.24554	9.30732	9.00988	54.11
TGGT1_220950;TGME49_220950	hypothetical protein	N/A	0	-0.192025	30.8916	30.6915	30.6445	30.5545			1.1145e-95	36	39.8	5	5	5	5	9.91478	9.25971	9.33862	9.3796	9.26064	35.62
TGGT1_223920;TGVEG_223920;TGME49_223920	rhoptry neck protein RON3;rhoptry neck protein, putative	HMM: MTTSPRVAKWALRVLALVFLHHVTVCT, NN: MTTSPRVAKWALRVLALVFLHHVTVCT;HMM: QQTRHILPFGSLFPGGILGK, NN: QQTRHILPFGSLFPGGILGKIMQKLMRSYIMFFHPVLAN	1	-0.0656605	30.9514	31.2021	30.9679	31.0543			2.2588e-173	147	25.3	28	33	31	32	10.0201	9.32139	9.5304	9.42252	9.36914	223.03
TGGT1_224330;TGVEG_224330;TGME49_224330	proteasome activator pa28 beta subunit protein	N/A	0	NaN	NaN	NaN	NaN	24.3935			0.0069836	1	2	0	0	0	1	7.37843	NaN	NaN	NaN	7.37843	47.917
TGGT1_225200;TGVEG_225200;TGME49_225200	hypothetical protein	HMM: MGLFAFLSRRCLLLLFFAVLLSGEDWIRPTLAA, NN: MGLFAFLSRRCLLLLFFAVLLSGE	0	NaN	24.7684	NaN	NaN	NaN			0.001821	2	1.5	1	1	0	0	7.45603	7.45603	NaN	NaN	NaN	158.3
TGGT1_226380;TGVEG_226380;TGME49_226380	hypothetical protein;putative transmembrane protein	HMM: MYPLTVYSILAVVGLSLVCRGI, NN: MYPLTVYSILAVVGLSLVCRGIATE;HMM: MYPLTVYWILAVVGLSLVCRGI, NN: MYPLTVYWILAVVGLSLVCRGIATE	2	-0.268312	NaN	28.1709	27.9652	27.84			5.9785e-48	24	35.7	2	6	7	5	9.05572	8.11968	8.55363	8.60153	8.39428	42.662
TGGT1_226830;TGVEG_226830;TGME49_226830	DnaK family protein	HMM: MALPAFEGVSPCVGGDRRVSPSGSSVRFSSHSSRLGCFFFAFCFLSVSLFSPLGAKAQ, NN: MALPAFEGVSPCVGGDRRVSPSGSSVRFSSHSSRLGCFFFAFCFLSVSLFSPLGAKAQ;HMM: MALPAFEGVSPCVGGDRRVSPSGSSVRSLSHSSRLGCFFFAFCFLSVSLFSPLGAKAQ, NN: MALPAFEGVSPCVGGDRRVSPSGSSVRSLSHSSRLGCFFFAFCFLSVSLFSPLGAKAQ;HMM: MALPAFEGVSPCVGGHRRVSPSGSSVRSLSHSSRLGCFFFAFCFLSVSLFSPLGAKAQ, NN: MALPAFEGVSPCVGGHRRVSPSGSSVRSLSHSSRLGCFFFAFCFLSVSLFSPLGAKAQ	0	-0.143488	30.4417	30.3906	30.2532	30.2922			1.1293e-131	53	29.3	13	15	18	14	9.81111	9.11691	9.26853	9.2903	9.13261	104.93
TGGT1_227620;TGME49_227620;TGVEG_227620	dense granule protein GRA2	HMM: MFAVKHCLLVVAVGALVNVSVRAA, NN: MFAVKHCLLVVAVGALVNVSVRAA	0	-0.209438	34.5367	34.4557	34.1702	34.4033			2.4483e-58	105	49.7	8	7	9	6	11.0296	10.3821	10.4533	10.4919	10.3712	19.842
TGGT1_227810;TGME49_227810;TGVEG_227810	rhoptry kinase family protein ROP11 (incomplete catalytic triad)	HMM: MSSSRLVLVSKMVDSCARLACFCIGLFFCLAVWQHQAGHAY, NN: MSSSRLVLVSKMVDSCARLACFCIGLFFCLAVWQHQAG	0	-0.144753	29.8456	29.9067	29.694	29.7688			7.5501e-82	54	42	11	13	12	10	9.64362	8.9987	9.16941	9.01737	8.94783	58.207
TGGT1_227948;TGVEG_227948;TGME49_227948	peptidase M16 inactive domain-containing protein	HMM: MRFSVVSAPMATPSTATGS, NN: MRFSVVSAPMATPSTATGS	0	0.134483	29.8672	30.0995	30.1673	30.0683			3.0537e-146	91	34.2	23	22	26	20	9.72708	8.96492	9.19948	9.23236	9.04976	142.64
TGGT1_227970;TGVEG_227970;TGME49_227970	histone family DNA-binding protein	HMM: MQTLSLSLVLLVALSTSQ, NN: MQTLSLSLVLLVALSTSQ;HMM: MQTLSLSLVLLVVLSTSQ, NN: MQTLSLSLVLLVVLSTSQELLVAE	0	-0.0255785	29.1798	29.1527	29.1203	29.161			1.0265e-33	29	26.8	4	5	5	6	9.45656	8.74098	8.86446	8.93142	8.86018	25.16
TGGT1_228170;TGME49_228170;TGVEG_228170	inner membrane complex protein IMC2A	HMM: MERRTRPDVSPRWQARRIHFVWLTALAVPIFLLFPSLSLLESTSSAGCSGIQCFASFPGVAAG, NN: MERRTRPDVSPRWQARRIHFVWLTALAVPIFLLFPSLSL	1	-0.0492525	30.5629	30.6236	30.5297	30.5583			1.7731e-105	93	19.4	22	20	24	20	9.87589	9.25758	9.2755	9.37429	9.16179	182.33
TGGT1_229010;TGVEG_229010;TGME49_229010	rhoptry neck protein RON4	HMM: MAIKNTLTGSGLLVLLTLACGTTVQSS, NN: MAIKNTLTGSGLLVLLTLACGTTVQSS	0	-0.0588417	30.3247	30.3235	30.1312	30.3993			5.2991e-199	80	31.3	13	17	17	13	9.7965	9.16714	9.2284	9.30544	9.03226	107.34
TGGT1_229030;TGME49_229030;TGVEG_229030A	hypothetical protein;microsomal signal peptidase 25 kDa subunit	N/A	2	0.118416	27.4375	NaN	27.6152	27.4966			2.1223e-12	9	21.1	4	1	3	3	8.85858	8.39428	7.80464	8.38858	8.2194	25.398
TGGT1_229480;TGVEG_229480;TGME49_229480	calcium binding protein precursor, putative;putative calcium binding protein precursor	HMM: MAAFADRPTCRVSLGAVFLARELHRLRKSLPLCVFSLFLFSFAFSALSGA, NN: MAAFADRPTCRVSLGAVFLARELHRLRKSLPLCVFSLFLFSFAFSA	1	-0.0783691	29.2988	31.1648	29.3585	30.9484			1.0516e-114	60	53.4	8	15	5	10	9.8601	8.73474	9.58936	8.67952	9.36927	38.277
TGGT1_230180	hypothetical protein;putative transmembrane protein	HMM: MLQMARYTANICAVSICSLVLVVALSVGI, NN: MLQMARYTANICAVSICSLVLVVAL;HMM: MLQMARYTVNICAVSICSLVLVVALSV, NN: MLQMARYTVNICAVSICSLVLVVAL	1	NaN	25.5752	NaN	NaN	NaN			1.2845e-09	3	8.7	1	1	1	0	8.1959	7.69891	7.35828	7.92526	NaN	57.302
TGGT1_230510	hypothetical protein	HMM: MVSAPFSLRGHAAHDCVRFFFLWATLGVYVFLCCSASSAL, NN: MVSAPFSLRGHAAHDCVRFFFLWATLGVYVFLCCSASSAL	1	NaN	NaN	NaN	23.7651	NaN			1.9114e-09	1	4.8	0	0	1	0	7.29702	NaN	NaN	7.29702	NaN	39.498
TGGT1_230940;TGME49_230940;TGVEG_230940	hypothetical protein	N/A	0	-0.157515	29.7396	29.5338	29.479	29.4794			1.0201e-82	36	14.8	13	11	10	8	9.56948	9.00022	9.03157	9.00462	8.79545	155.22
TGGT1_231130;TGVEG_231130;TGME49_231130	hypothetical protein;M28 family peptidase	N/A	3	NaN	NaN	26.1747	NaN	NaN			1.1692e-05	1	3.8	0	2	1	1	8.16337	NaN	7.97282	7.46957	7.34739	77.043
TGGT1_231410;TGVEG_231410;TGME49_231410	hypothetical protein	N/A	0	-0.276221	28.9406	28.6069	28.5125	28.4825			4.7753e-34	23	16.5	4	7	6	4	9.31031	8.49613	8.8504	8.85277	8.48955	64.671
TGGT1_231920;TGVEG_231920;TGME49_231920	oxidoreductase, short chain dehydrogenase/reductase family protein	N/A	0	NaN	NaN	NaN	25.8422	NaN			1.5269e-14	5	17.5	2	2	2	2	8.45506	7.85565	7.64234	7.92232	7.93405	33.749
TGGT1_231960	putative omega secalin	HMM: MKVRSVLSVGFWAAACIAF, NN: MKVRSVLSVGFWAAACIAF	0	NaN	NaN	NaN	25.8909	NaN			3.1671e-17	2	3.6	1	0	1	0	8.18469	7.82289	NaN	7.93697	NaN	119.72
TGGT1_232130;TGVEG_232130;TGME49_232130	hypothetical protein	N/A	0	NaN	NaN	NaN	25.9913	NaN			2.4306e-25	9	18.4	2	2	3	2	8.80121	8.4368	7.77485	7.96719	8.31608	48.811
TGGT1_232180;TGVEG_232180;TGME49_232180	UBA/TS-N domain-containing protein	N/A	1	NaN	NaN	NaN	24.4357	NaN			3.7844e-08	4	0.7	1	1	1	1	7.86381	7.19112	7.41516	7.49889	NaN	206.85
TGGT1_232250;TGVEG_232250;TGME49_232250	catalase	N/A	0	0.0202303	31.5182	31.4425	31.4812	31.52			3.3036e-140	114	45.6	17	14	17	12	10.155	9.49525	9.60245	9.64008	9.44581	57.27
TGGT1_233140;TGVEG_233140;TGME49_233140	deoxyuridine 5'-triphosphate nucleotidohydrolase, putative;putative deoxyuridine 5'-triphosphate nucleotidohydrolase	N/A	0	-0.373237	29.1512	29.181	28.7764	28.8093			1.1483e-20	23	42.4	4	6	4	5	9.40092	8.68095	8.96006	8.76452	8.73551	18.19
TGGT1_233230;TGVEG_233230;TGME49_233230	RNA-binding protein 8A family protein	N/A	0	-0.310093	28.6144	29.0173	28.5239	28.4876			5.1413e-30	20	37.7	4	6	3	5	9.30079	8.63636	8.93226	8.48038	8.61086	18.424
TGGT1_233450;TGVEG_233450;TGME49_233450	SAG-related sequence SRS29A	N/A	1	-0.112722	27.6437	NaN	27.531	NaN		+	2.1678e-17	10	14.3	4	2	2	1	8.81083	8.42508	8.04544	8.28133	7.89552	44.243
TGGT1_233460;TGVEG_233460;TGME49_233460	SAG-related sequence SRS29B	HMM: MSVSLHHFIISSGFLASMFPKAVRRAVTAGVFAAPTLMSFLRCGAMAS, NN: MSVSLHHFIISSGFLASMFPKAVRRAVTAGVFAAPTLMSFLRCGAMAS;HMM: MSVSLHHFIISSGFLTSMFPKAVRRAVTAGVFAAPTLMSFLRCGVMAS, NN: MSVSLHHFIISSGFLTSMFPKAVRRAVTAGVFAAPTLMSFLRCGVMAS	0	-0.267069	35.9374	35.5393	35.6987	35.2439		+	4.2765e-268	301	63.7	22	21	23	19	11.4075	10.8225	10.7967	10.8899	10.6892	34.829
TGGT1_233480;TGVEG_233480;TGME49_233480	SAG-related sequence SRS29C	HMM: MATRASLARQKTGAACLAVLTASPSVVAAK, NN: MATRASLARQKTGAACLAVLTASPSVVAAKPWKRWVGVSVILASAFAVGVSAG	0	0.0761166	31.9606	31.1851	31.8121	31.4858		+	2.9307e-49	46	33.3	6	5	6	2	10.2079	9.55132	9.53227	9.78964	9.47909	39.215
TGGT1_235470;TGVEG_235470;TGME49_235470	myosin A	N/A	0	-0.142427	33.2422	33.2389	33.1041	33.0922			4.3208e-221	257	50.4	38	35	36	34	10.6599	10.0323	10.1106	10.0884	9.99009	93.333
TGGT1_236540;TGVEG_236540;TGME49_236540	RNA recognition motif-containing protein	N/A	0	-0.401364	30.3228	30.1899	29.789	29.921			5.5447e-68	59	32.5	11	12	12	11	9.72092	9.14095	9.1871	9.12011	9.00805	53.017
TGGT1_236570;TGVEG_236570;TGME49_236570	lysine decarboxylase family protein	N/A	0	0.00873661	29.5688	29.4095	29.4849	29.5109			1.223e-46	42	34.8	10	7	10	8	9.55587	8.93348	8.93155	9.01945	8.92348	43.956
TGGT1_237140;TGVEG_237140;TGME49_237140	ethylene inducible protein, putative;putative ethylene inducible protein	N/A	0	NaN	NaN	27.1094	NaN	NaN			4.8679e-13	3	18.6	1	3	2	1	8.55229	7.22835	8.25419	8.06863	7.63447	32.684
TGGT1_238950;TGVEG_238950;TGME49_238950	fatty acyl-CoA desaturase, putative;putative fatty acyl-CoA desaturase	HMM: MALLTEIAALWVRDLLRRTLGG, NN: MALLTEIAALWVRDLLRRTLGG	14	-0.0146208	NaN	26.1745	26.0019	26.3179			7.9025e-40	10	4.4	1	3	3	3	8.51101	7.6383	8.03755	7.98933	7.87081	117.19
TGGT1_238970;TGVEG_238970;TGME49_238970	hypothetical protein	N/A	0	NaN	NaN	NaN	NaN	26.3592			0.00030257	3	0.8	1	1	0	1	8.62429	7.72892	8.43786	NaN	7.97017	286.75
TGGT1_239010	hypothetical protein	HMM: MRTGDHRTGVRLIICSLVPIAIIANTLGS, NN: MRTGDHRTGVRLIICSLVPIAIIANTLGS	1	-0.359793	26.5891	NaN	26.2293	NaN			5.6999e-08	5	8.2	2	1	2	1	8.5891	7.9999	7.96149	8.04415	7.93476	70.758
TGGT1_239530;TGVEG_239530;TGME49_239530	alanine-glyoxylate aminotransferase	N/A	0	-0.0575466	NaN	27.933	27.8754	NaN			6.7846e-19	11	26	3	3	4	1	9.01616	8.48272	8.46526	8.56965	7.85049	41.811
TGGT1_239740;TGVEG_239740;TGME49_239740	dense granule protein GRA14	HMM: MQAIARGDRSSGWSSCSWLFYFSFLLLTSEAVAAAA, NN: MQAIARGDRSSGWSSCSWLFYFSFLLLTSEAVAAA	0	-0.106297	30.6885	30.7169	30.6597	30.5331			8.712e-43	49	26	9	8	8	8	9.90445	9.30658	9.3298	9.34013	9.22373	44.753
TGGT1_240060;TGVEG_240060;TGME49_240060	hypothetical protein	N/A	0	-0.151484	29.4583	29.1446	29.1699	29.13			3.8403e-63	42	25.6	8	11	13	10	9.4823	8.73934	8.95408	9.02678	8.71939	88.786
TGGT1_240090;TGVEG_240090;TGME49_240090	putative rhoptry kinase family protein ROP34;rhoptry kinase family protein ROP34, putative	N/A	0;1	0.0849886	27.231	27.3099	27.1692	27.5416			5.8809e-17	18	9.9	4	5	5	5	8.89774	8.16382	8.33604	8.34364	8.31595	61.601
TGGT1_240980;TGVEG_240980;TGME49_240980	hypothetical protein	N/A	0	NaN	24.547	NaN	NaN	NaN			4.0945e-05	0	1.5	1	1	0	1	7.81445	7.3894	7.4358	NaN	7.1284	152.2
TGGT1_242625;TGVEG_242625;TGME49_242625	ATPase family associated with various cellular activities (AAA) subfamily protein	HMM: MASESSSVAADIAAALLPLVRAL, NN: MASESSSVAADIAAALLPLVRAL	0	NaN	NaN	NaN	NaN	26.6442			0.0016117	2	0.2	1	0	0	1	8.30874	7.95338	NaN	NaN	8.05595	976.2
TGGT1_247220;TGVEG_247220;TGME49_247220	nudix -type motif 9 isoform a family protein	N/A	0	-0.204356	28.6919	28.8271	28.546	28.5642			4.7121e-41	33	24.7	5	9	7	7	9.30867	8.52375	8.78934	8.81682	8.6334	60.512
TGGT1_247440;TGVEG_247440;TGME49_247440	hypothetical protein;putative transmembrane protein	HMM: MRHQERFDLRTGVLLCIGLVGWSGFVVQH, NN: MRHQERFDLRTGVLLCIGLVGWSG	4	-0.824463	27.2858	NaN	26.4613	NaN			3.914e-39	8	20.1	3	1	3	1	8.61992	7.98345	7.81975	8.34649	7.51084	40.129
TGGT1_247450;TGVEG_247450;TGME49_247450	hypothetical protein	N/A	0	NaN	NaN	25.0913	NaN	NaN			4.4895e-09	4	1.7	1	2	2	1	8.06322	7.45877	7.64669	7.62918	NaN	245.89
TGGT1_247520;TGVEG_247520;TGME49_247520	hypothetical protein;putative transmembrane protein	HMM: MKTETRQRSRGGGKRLSLCVVFALVSISSVSFVTAS, NN: MKTETRQRSRGGGKRLSLCVVFALVSISSVSFVTAS	1	-0.0758266	29.5552	29.1209	29.4521	29.0724			1.8116e-60	32	29.7	4	3	3	3	9.52152	8.91369	8.92059	9.06006	8.71762	26.332
TGGT1_248990;TGVEG_248990;TGME49_248990	hypothetical protein;putative prenylcysteine lyase protein	N/A	0	NaN	NaN	23.9894	NaN	NaN			8.0959e-05	0	3.3	0	1	1	0	7.69041	NaN	7.31496	7.45289	NaN	79.169
TGGT1_249200	Ctr copper transporter family protein	HMM: MTISASSTARGCAAPPLHAETVARSPPSVKPATWLPPSSLFQGRWTKFLLAASALFAVTTQ, NN: MTISASSTARGCAAPPLHAETVARSPPSVKPATWLPPSSLFQGRWTKFLLAASALFAVTTQ	4	NaN	24.4098	NaN	NaN	NaN			0.0054315	1	4.3	1	0	0	0	7.34809	7.34809	NaN	NaN	NaN	25.614
TGGT1_249650;TGVEG_249650;TGME49_249650	apolipoprotein A-I binding protein, putative;putative apolipoprotein A-I binding protein	HMM: MQKRVIHSPSWLLPAALPFGWPLGLWSPSSRSAL, NN: MQKRVIHSPSWLLPAALPFGWPLGLWSPSSRSA	0	NaN	NaN	NaN	NaN	25.8424			5.2607e-08	3	10.2	0	1	0	2	7.96263	NaN	7.42326	NaN	7.81461	37.516
TGGT1_249670;TGVEG_249670;TGME49_249670	cathepsin B	HMM: MEGRKSFRVLGTPLPVAALAAILLLGCMYTRAAGT, NN: MEGRKSFRVLGTPLPVAALAAILLLGCMYTRAAGT;HMM: MEKMEGRKSFRVLGTPLPVAALAAILLLGCMYTRAAGT, NN: MEKMEGRKSFRVLGTPLPVAALAAILLLGCMYTRAAGT	1	-0.321793	28.8198	28.7323	28.5288	28.3797			7.6756e-37	28	22	8	8	7	5	9.29048	8.69253	8.82983	8.70917	8.43395	62.178
TGGT1_250820;TGVEG_250820;TGME49_250820	hypothetical protein	N/A	0	NaN	NaN	NaN	25.4354	NaN			3.4903e-05	2	2.9	0	0	1	1	7.79984	NaN	NaN	7.79984	NaN	120.91
TGGT1_251540;TGVEG_251540;TGME49_251540	dense granule protein GRA9	HMM: MRSLKSIVVPLSAALVAAA, NN: MRSLKSIVVPLSAALVAAA	0	0.185542	29.682	29.7808	29.8213	30.0127			2.9293e-67	56	49.1	9	12	9	10	9.65631	8.85429	9.10894	9.12522	9.07842	35.31
TGGT1_251690;TGVEG_251690;TGME49_251690	putative seryl-tRNA synthetase, cytoplasmic;seryl-tRNA synthetase, cytoplasmic, putative	N/A	0	-0.171938	31.1721	31.0681	30.9958	30.9005			1.4988e-102	94	44.6	16	16	16	16	10.0181	9.32897	9.47933	9.48144	9.35166	54.146
TGGT1_253900;TGME49_253900;TGVEG_253900	parasite porphobilinogen synthase PBGS	HMM: MRPLSLFFRLSFLLFVLLFPSPSVDAL, NN: MRPLSLFFRLSFLLFVLLFPSPSVDAL	0	-0.0936279	27.3607	27.5547	27.3858	27.3423			2.6079e-33	22	13.7	5	8	6	4	8.93736	8.08736	8.59062	8.37138	8.07419	71.361
TGGT1_255260;TGVEG_255260;TGME49_255260	apical membrane antigen AMA1	N/A	1	-0.240305	31.4365	31.3715	31.1802	31.1472			7.7002e-90	74	28.5	12	12	12	8	10.0902	9.4981	9.53286	9.54124	9.3565	63.02
TGGT1_255890;TGVEG_255890;TGME49_255890	pyridine nucleotide-disulfide oxidoreductase domain-containing protein	N/A	0	NaN	NaN	24.8135	NaN	NaN			1.1931e-07	3	2.8	0	2	0	1	7.73869	NaN	7.56304	NaN	7.26067	85.854
TGGT1_256970;TGVEG_256970;TGME49_256970	putative vacuolar ATP synthase subunit A;vacuolar ATP synthase subunit A, putative	N/A	0	-0.369015	30.2097	30.3829	29.9306	29.9239			5.4953e-82	55	47.7	13	11	13	13	9.73637	9.11478	9.13011	9.15051	9.14104	68.147
TGGT1_257380;TGVEG_257380;TGME49_257380	hypothetical protein	HMM: MLAPTFFFPVPLFLCDPCFAF, NN: MLAPTFFFPVPLFLCDPCFAFAN	0	0.294907	29.3776	30.1676	30.0373	30.0976			2.6168e-51	36	58.3	5	8	7	5	9.72554	8.64582	9.27007	9.25464	9.08393	23.86
TGGT1_257490;TGVEG_257490;TGME49_257490	prefoldin subunit superfamily protein	N/A	0	-0.0762348	NaN	27.4336	NaN	27.3573			2.7711e-08	7	20.2	2	2	1	2	8.84563	8.31498	8.34052	7.92315	8.28217	24.091
TGGT1_258070;TGVEG_258070;TGME49_258070	hypothetical protein;signal recognition particle 68 kDa protein	N/A	0	0.136318	NaN	27.0086	27.1449	NaN			2.7971e-18	9	10.3	4	5	3	2	8.71354	7.95149	8.34276	8.16785	7.78018	75.713
TGGT1_258360;TGVEG_258360;TGME49_258360	hypothetical protein	HMM: MPALLSRTVLSALVSCGLGLSDFATSYGF, NN: MPALLSRTVLSALVSCGLGL	0	NaN	NaN	NaN	25.7286	NaN			7.3891e-19	5	7.8	0	1	3	1	8.19786	NaN	7.65082	7.88809	7.55228	58.922
TGGT1_258390;TGVEG_258390;TGME49_258390	DnaJ protein, putative;putative DnaJ protein	HMM: MGLLHLLKGLFPLCIAFGMLLETW, NN: MGLLHLLKGLFPLCIAF	0	0.0253048	28.7536	28.8969	28.7686	28.9325			2.9053e-42	26	36.3	6	7	6	6	9.35553	8.64416	8.82295	8.7938	8.73196	44.619
TGGT1_258580;TGVEG_258580;TGME49_258580	rhoptry protein ROP17	HMM: MELVLCFVIITISGVIRESSAL, NN: MELVLCFVIITISGVIRESSAL	0	0.0206566	29.9525	30.2582	30.0548	30.1973			2.0213e-70	56	27	8	11	13	10	9.75825	8.84078	9.23747	9.33149	9.06636	69.053
TGGT1_258870A	hypothetical protein	N/A	1	NaN	26.7216	NaN	NaN	NaN			3.2254e-58	3	27.3	2	1	0	0	8.21977	8.04399	7.74199	NaN	NaN	60.655
TGGT1_259550;TGVEG_259550;TGME49_259550	dihydropteroate synthase	HMM: MGCWPPSFACLRLSWWNLPLFHKRSAFFFWPPPGLRLRPLPGGAIAHCASSR, NN: MGCWPPSFACLRLSWWNLPLFHKRSAFFFWPPPGLRLR;HMM: MGCWPPSFACLRLSWWNLPLFHKRSAFFFWPPPGLRLRSLPGGAIAHCASSR, NN: MGCWPPSFACLRLSWWNLPLFHKRSAFFFWPPPGLRLR	0	-0.0782108	30.096	30.1962	30.0887	30.0471			2.3284e-84	51	23	8	14	8	13	9.73169	8.98913	9.22266	9.04532	9.21384	82.724
TGGT1_259630;TGVEG_259630;TGME49_259630	hypothetical protein	N/A	0	NaN	NaN	NaN	NaN	26.8669			8.8511e-06	3	11.2	1	1	1	2	8.61398	7.73823	8.16944	7.88041	8.12303	18.283
TGGT1_262710;TGME49_262710	Ctr copper transporter family protein	N/A	3	NaN	27.3124	NaN	NaN	NaN			1.9483e-18	4	12.3	3	1	2	1	8.61463	8.22186	7.91355	8.067	7.667	40.592
TGGT1_263870;TGVEG_263870;TGME49_263870	glutamate-tRNA ligase	N/A	0	-0.0991497	29.1584	28.8962	28.9115	28.9448			5.733e-83	30	21.6	8	11	10	8	9.39999	8.78664	8.864	8.89398	8.58596	92.602
TGGT1_264040;TGVEG_264040;TGME49_264040	hypothetical protein	HMM: MLRTSLLLRFAGAPIVSSTRGA, NN: MLRTSLLLRFAGAPIVSSTRGA	0	-0.207571	27.5632	27.6453	27.2996	27.4937			2.1008e-35	13	27.3	3	3	4	2	8.95388	8.36931	8.35042	8.4644	8.1754	24.547
TGGT1_266990;TGVEG_266990;TGME49_266990	beta-COP	N/A	0	0.0171127	26.9959	27.1939	27.065	27.1591			1.8414e-16	11	7.2	4	4	2	4	8.81947	8.26442	8.34555	7.98353	8.19921	121.98
TGGT1_267330;TGVEG_267330;TGME49_267330	fumarate hydratase	HMM: MRGTRRFFHASCSFFVLTSSTLQL, NN: MRGTRRFFHASCSFFVLTSSTLQLDSF;HMM: MRGTRRFFHASCSFFVLTSTLQL, NN: MRGTRRFFHASCSFFVLTSTLQLD	0	NaN	24.1951	NaN	NaN	NaN			1.5025e-06	2	3.9	1	0	1	0	7.8628	7.28346	NaN	7.73001	NaN	84.28
TGGT1_269950;TGVEG_269950;TGME49_269950	hypothetical protein	HMM: MIGLFSSHFLRRHKMAGRASVVVSLLFSASLWSLLSRVDGA, NN: MIGLFSSHFLRRHKMAGRASVVVSLLFSASLWSLLSRVDGA	0	-0.0176678	31.6364	31.5777	31.6103	31.5685			0	157	41.4	27	27	27	26	10.1822	9.5954	9.57918	9.61761	9.52304	104.63
TGGT1_270250;TGVEG_270250	dense granule protein GRA1	HMM: MVRVSAIVGAAASVFVCLSAGAYAA, NN: MVRVSAIVGAAASVFVCLSAGAYAA	0	-0.562931	28.7472	31.9543	28.8974	30.6783			1.5709e-34	31	36.8	4	7	2	5	9.91345	8.6659	9.74865	8.56671	9.2443	20.149
TGGT1_270510;TGME49_270510;TGVEG_270510	asparaginyl-tRNA synthetase (NOB+tRNA synthase)	HMM: MPRRCWQLFVCCSVREFPVSVASRLLLPLLFVLASARNSALLYSSALTLRSSAAPLAFSS, NN: MPRRCWQLFVCCSVREFPVSVASRLLLPLLFVLASAR	0	0.0582638	33.0858	33.3473	33.2193	33.3303			8.9921e-162	208	42.6	25	28	27	27	10.6888	10.0082	10.1461	10.1177	10.0621	74.918
TGGT1_271350;TGVEG_271350;TGME49_271350	bifunctional protein FolC subfamily protein	N/A	0	NaN	NaN	NaN	23.4864	NaN			7.4252e-06	1	4.2	1	0	1	0	7.62768	7.41657	NaN	7.21312	NaN	61.421
TGGT1_271820;TGVEG_271820;TGME49_271820	lipoyltransferase and lipoate-protein ligase subfamily protein	N/A	0	NaN	NaN	NaN	NaN	25.6259			1.1557e-10	3	6.3	1	1	1	3	8.16649	7.14376	7.64219	7.51532	7.74944	52.553
TGGT1_273490;TGVEG_273490;TGME49_273490	glutamine synthetase, type I, putative;putative glutamine synthetase, type I	N/A	0;1	-0.00648689	27.8927	28.1481	27.9704	28.0575			5.0976e-20	20	15.2	6	6	6	5	9.11197	8.46349	8.58213	8.61088	8.32866	53.455
TGGT1_273905;TGVEG_273905;TGME49_273905	hypothetical protein;putative ARM repeat protein	HMM: MNLFLFFLRFRAIPRSSVLPSQSLLLKTAKRVHSPLFLVYLLLLSAVPAAVTR, NN: MNLFLFFLRFRAIPRSSVLPSQSLLLKTAKRVHSPLFLVYLLLLSAVPAAVTR;N/A	0;2	NaN	NaN	26.7015	NaN	NaN			8.8695e-09	4	12.6	1	2	0	2	8.49871	7.62866	8.13136	NaN	8.13814	41.124
TGGT1_273960;TGVEG_273960;TGME49_273960	chaperonin GroS protein	N/A	0	-0.236993	28.0844	28.0475	27.8819	27.7761			7.9455e-20	13	17.1	4	2	3	4	9.07947	8.49837	8.38947	8.50043	8.51057	39.935
TGGT1_274060;TGVEG_274060;TGME49_274060	2-oxoglutarate/malate translocase OMT	N/A	1	0.467346	26.9982	27.6607	27.5734	28.0202			1.009e-38	18	37.5	5	6	5	6	8.98596	8.1672	8.48047	8.40116	8.42658	35.071
TGGT1_275440;TGME49_275440;TGVEG_275440	dense granule protein GRA6	N/A	2	0.108237	28.4881	27.9746	28.3967	28.2824			1.9554e-13	14	8.1	3	2	2	2	9.18904	8.70024	8.43186	8.63959	8.52824	23.352
TGGT1_275690;TGVEG_275690;TGME49_275690	ClpB, putative;putative ClpB	HMM: MQRSCLQISGCSALYLPMAWPRGLSGPPRGRSRRLTPRGRLLFLRGALLVALVQQTVGH, NN: MQRSCLQISGCSALYLPMAWPRGLSGPPRGRSRRLTPRGRLLFLRGALLVALVQQTVGH;N/A	0;1	-0.0316019	28.6468	28.89	28.7011	28.7725			3.4848e-61	32	18.1	10	11	7	8	9.32966	8.6704	8.88564	8.71318	8.58323	114.6
TGGT1_275802;TGME49_275802;TGVEG_275802	SRP72 RNA-binding domain-containing protein	N/A	0	NaN	NaN	NaN	NaN	26.548			6.1966e-15	3	7.9	0	2	1	3	8.34842	NaN	7.84603	7.66735	8.02702	79.907
TGGT1_277080;TGVEG_277080;TGME49_277080	microneme protein MIC5	HMM: MLRPTVRSSLLSLGLTVILYLALTGSADAL, NN: MLRPTVRSSLLSLGLTVILYLALTGSADAL	1	-0.617081	NaN	28.1081	NaN	27.4911			3.6754e-11	6	26	0	3	0	3	8.74868	NaN	8.52757	NaN	8.34965	19.93
TGGT1_277270	NTPase II	N/A	0	-0.0638008	34.8609	34.7371	34.7123	34.7582			0	373	65.3	34	33	33	35	11.1439	10.5503	10.5238	10.5924	10.4951	95.782
TGGT1_277720;TGVEG_277720;TGME49_277720	GDA1/CD39 (nucleoside phosphatase) family protein	HMM: MAEREAEDRLSSRRSLPFRVFSFSLLLLLFSKATWEEAAAV, NN: MAEREAEDRLSSRRSLPFRVFSFSLLLLLFSKATWEEAAAV;HMM: MAEREAEDRLSSRRSPPFRVFSFSLLLLLFSKTTWEEAAAV, NN: MAEREAEDRLSSRRSPPFRVFSFSLLLLLFSKTTWEEAAAV	0	-0.470394	NaN	25.9295	25.4591	NaN			7.7802e-12	8	6.3	1	2	3	2	8.30266	NaN	7.90313	7.80116	7.75949	92.506
TGGT1_278660;TGVEG_278660;TGME49_278660	P-type ATPase4, putative;putative P-type ATPase4	N/A	8	-0.0837107	28.8908	28.5332	28.6607	28.5959			1.3134e-57	31	12.4	5	8	10	9	9.31288	8.50395	8.71652	8.85011	8.7054	144.66
TGGT1_279100	hypothetical protein	HMM: MWRIWRCRLSFLFVTGCLLGALTAGLGS, NN: MWRIWRCRLSFLFVTGCLLGALTA	1	0.135453	28.0226	28.5226	28.3944	28.4217			5.5352e-180	16	43.7	4	3	3	4	9.20306	8.46685	8.70198	8.51028	8.67745	47.994
TGGT1_285870;TGME49_285870;TGVEG_285870	SAG-related sequence SRS20A	HMM: MVSCKRLAASRRQCLFFNACLFCLFICTVQIRAIAGA, NN: MVSCKRLAASRRQCLFFNACLFCLFICTVQIRAIAGA	1	-0.389802	29.4447	28.6821	29.0417	28.3055		+	2.5617e-40	16	32.3	5	3	5	2	9.37887	8.92874	8.60619	8.94808	8.40279	34.955
TGGT1_286270;TGVEG_286270;TGME49_286270	hypothetical protein	N/A	0	NaN	NaN	28.8877	NaN	NaN			0.00081398	2	0.3	0	2	1	1	9.09454	NaN	8.78952	8.74596	7.84592	619.13
TGGT1_286450;TGVEG_286450;TGME49_286450	dense granule protein GRA5	HMM: MASVKRVVVAVMIVNVLALIFVGVAGS, NN: MASVKRVVVAVMIVNVLALIFVGVAGS	2	0.125757	34.1209	33.757	33.9875	34.1419			1.0699e-297	235	68.3	7	8	7	9	10.9232	10.3306	10.2682	10.3698	10.3098	12.976
TGGT1_286580;TGVEG_286580;TGME49_286580	hypothetical protein;putative lysophospholipase	N/A	0	-0.0928574	29.7178	29.8029	29.6287	29.7062		+	4.3794e-64	60	21.3	11	14	13	12	9.61633	8.96592	9.11113	9.01246	8.94863	107.22
TGGT1_289330;TGVEG_289330;TGME49_289330	ubiquitin carboxyl-terminal hydrolase family 2 protein	N/A	0	0.0584135	25.7098	25.8731	25.8116	25.8882			1.0142e-19	8	2.7	2	4	2	3	8.44532	7.54143	8.04646	7.67498	7.93163	247.72
TGGT1_289380;TGME49_289380;TGVEG_289380	hypothetical protein	HMM: MESNRRRAPCPPASGVSPGSILCLFLLSLLPCALGA, NN: MESNRRRAPCPPASGVSPGSILCLFLLSLLPCALGA	0	0.121362	30.5287	30.7734	30.7514	30.7934			1.9454e-127	94	34.2	15	22	18	16	9.92519	9.13675	9.41519	9.40473	9.28031	100.23
TGGT1_289970;TGVEG_289970;TGME49_289970	hypothetical protein	N/A	0	-0.165504	27.8812	27.6927	27.5828	27.6602			3.1283e-28	19	29.3	3	4	4	3	9.01878	8.37271	8.47448	8.53493	8.22389	24.488
TGGT1_290700;TGVEG_290700;TGME49_290700	hypothetical protein	HMM: MKRFWLCALLSLLEFSWGCNAL, NN: MKRFWLCALLSLLEFSWGCNAL;HMM: MKRFWLCALLSLLEFSWGCNSL, NN: MKRFWLCALLSLLEFSWGCNSL	0	NaN	NaN	NaN	28.7598	NaN			4.5992e-61	5	27.2	3	0	4	1	9.01649	8.43407	NaN	8.80059	8.13082	34.474
TGGT1_290730;TGME49_290730;TGVEG_290730	CS domain-containing protein	HMM: MESLPASVRLLCPPLLSSAS, NN: MESLPASVRLLCPPLLSSAS;HMM: MESLPASVRLLCPPLLSSASPHLFSSLSST, NN: MESLPASVRLLCPPLLSSAS;HMM: MESLPASVRLLCPPLLSSASPYLFSSLSCT, NN: MESLPASVRLLCPPLLSSAS	0	NaN	NaN	NaN	24.9637	NaN			2.2916e-13	5	13.5	1	2	2	0	8.25232	7.71224	7.91247	7.65785	NaN	41.534
TGGT1_290890;TGME49_290890;TGVEG_290890	carbonyl reductase 1, putative;putative carbonyl reductase 1	N/A	0	NaN	26.4343	27.0185	NaN	NaN			7.3212e-23	8	11.7	3	3	1	2	8.60772	7.75344	8.32377	7.80756	7.86699	45.224
TGGT1_291890;TGVEG_291890;TGME49_291890	microneme protein MIC1	HMM: MGQALFLTVLLPVLFGVGPEAYGE, NN: MGQALFLTVLLPVLFGV	0	-0.104492	32.2198	32.0852	32.0918	32.0043			6.2975e-168	107	48.7	17	13	15	13	10.3417	9.72978	9.74218	9.76459	9.72066	48.672
TGGT1_291930;TGVEG_291930;TGME49_291930	RNA recognition motif-containing protein	N/A	0	-0.208653	30.155	29.9275	29.8354	29.8298			6.8662e-85	52	20.7	10	9	10	8	9.68382	9.08529	9.08693	9.1357	9.00996	73.131
TGGT1_291960;TGVEG_291960;TGME49_291960	rhoptry kinase family protein ROP40 (incomplete catalytic triad)	HMM: MTPSTCCFGVLFQSFRGNSASAS, NN: MTPSTCCFGVLFQSFRGNSASA	0	-0.00913239	31.4211	31.316	31.3033	31.4155			1.1336e-104	107	42.9	16	17	16	17	10.1121	9.45509	9.55837	9.52454	9.49574	57.904
TGGT1_295110;TGVEG_295110;TGME49_295110	putative rhoptry protein;rhoptry protein ROP7;rhoptry protein, putative	HMM: MGHPTSFGQPSCLVWLAAAFLVLGLCLVQQGAGI, NN: MGHPTSFGQPSCLVWLAAAFLVLGLCLVQQGAGI	1	-0.127581	32.783	32.7695	32.6759	32.6215			3.0742e-106	135	40.2	20	19	17	18	10.5226	9.86787	9.95646	9.97863	9.8673	63.412
TGGT1_297960B;TGVEG_297960B;TGME49_297960	rhoptry neck protein RON6	HMM: MGGRATTSGARSLALPLLALFKPSFVLLFFLSSAVSSGLAG, NN: MGGRATTSGARSLALPLLALFKPSFVLLFFLSSAVSSGLAG;N/A	0;1	NaN	NaN	24.4508	NaN	NaN			2.8228e-06	1	3.2	0	1	0	0	7.45387	NaN	7.45387	NaN	NaN	77.527
TGGT1_305510;TGVEG_305510;TGME49_305510	hypothetical protein	HMM: MAVAKLDGKTLPALRLALCGEGNAVTTWWAAMLLQSAAFEVVAAW, NN: MAVAKLDGKTLPALRLALCGEGNAVTTWWAAMLLQSAAFEVVAAW	0	0.123384	25.1161	NaN	25.2395	NaN			3.2639e-19	8	14.9	3	2	2	1	8.29294	7.5529	7.87726	7.74791	7.46605	45.203
TGGT1_306060;TGVEG_306060;TGME49_306060	rhoptry neck protein RON8	HMM: MVATTLHSLPSRYLYTLLMSFLFVCGALAL, NN: MVATTLHSLPSRYLYTLLMSFLFVCGALAL	1	-0.0811243	29.0212	29.323	29.1435	29.0385			5.821e-74	49	11	17	17	11	12	9.44289	8.82855	8.99057	8.82356	8.65712	329.03
TGGT1_306270	hypothetical protein	HMM: MKAYAYALLFLAVSVFTATCLSPVLGA, NN: MKAYAYALLFLAVSVFTATCLSPVLGA	1	NaN	NaN	NaN	NaN	26.1911			4.7839e-09	4	11.6	1	1	1	1	8.63556	7.98552	8.09816	8.10346	7.91957	16.098
TGGT1_306330;TGVEG_306330;TGME49_306330	phospholipase	N/A	0	-0.470044	NaN	27.4579	27.0002	26.9754			2.0742e-15	13	14.3	3	4	4	2	8.82077	7.94502	8.44003	8.36195	7.83367	63.255
TGGT1_306960;TGVEG_306960;TGME49_306960	phenylalanine--tRNA ligase, beta subunit protein	N/A	0	0.128806	28.0584	28.0936	28.1295	28.2801			2.479e-47	28	18.7	6	7	9	5	9.15628	8.39752	8.55245	8.75024	8.42136	74.556
TGGT1_308020;TGVEG_308020	hypothetical protein;SAG-related sequence SRS57	HMM: MQLWRRRAAGPASLGRQSLPLGCFFAAFGLCVLSAILGT, NN: MQLWRRRAAGPASLGRQSLPLGCFFAAFGLCVLSA	1	-0.213317	31.0772	30.8983	30.8537	30.6952		+	1.2907e-80	41	30.1	9	7	9	6	9.9735	9.31904	9.36229	9.48924	9.28679	41.773
TGGT1_308810B;TGVEG_308810B;TGME49_308810	rhoptry neck protein RON9	N/A	1	NaN	NaN	23.215	NaN	NaN			3.5795e-10	4	4.4	1	1	1	1	8.20284	7.97243	7.08185	7.5097	7.32781	115.12
TGGT1_308840;TGVEG_308840;TGME49_308840	SAG-related sequence SRS51	N/A	0	-0.180903	30.364	30.5689	30.2506	30.3206		+	4.2306e-72	44	28.9	6	4	6	4	9.81799	9.38527	8.93628	9.39205	8.91302	38.038
TGGT1_308970;TGVEG_308970;TGME49_308970	hypothetical protein	HMM: MILRHLVDLATAGVLLVLFNGAAGPVSGL, NN: MILRHLVDLATAGVLLVLFNGAAGP;HMM: MILRHLVDLATASALLVFFSGAAGPVSGL, NN: MILRHLVDLATASALLVFFSGAAGPVSGL	0	NaN	NaN	NaN	26.336	NaN			6.6218e-05	3	8.5	1	0	2	1	8.35769	7.54825	NaN	8.07096	7.8738	38.212
TGGT1_309120;TGVEG_309120;TGME49_309120	ribosomal protein RPL4	HMM: MCLSLCLCPCVSAAFSR, NN: MCLSLCLCPCVSAA;N/A	0	-0.198843	32.756	32.6305	32.6696	32.3193			6.2388e-223	147	60.3	24	23	21	20	10.4933	9.9012	9.90631	9.97789	9.74913	45.748
TGGT1_309590	rhoptry protein ROP1	HMM: MACRQLLCSVQNLLFFFLRDIYCT, NN: MACRQLLCSVQNLLFFFLRDIYCT;HMM: MACRQLLCSVQNLLFYFLPDIYCT, NN: MACRQLLCSVQNLLFYFLPDIYCT	0	-0.0585575	33.4734	33.132	33.3173	33.1709			2.5175e-71	88	24.1	14	13	16	12	10.6953	10.1027	10.0526	10.2068	9.97875	49.541
TGGT1_309760;TGVEG_309760;TGME49_309760	hypothetical protein	HMM: MKVGISRYVGRFTVLIGVVTLLVSSGPQRVTST, NN: MKVGISRYVGRFTVLIGVVTLLVSSG	0	-0.0658588	26.4994	27.1866	27.024	26.5303			2.7366e-27	13	14.9	2	4	3	4	8.76548	7.79626	8.3506	8.24065	8.08629	34.526
TGGT1_310050;TGVEG_310050;TGME49_310050	RNA recognition motif-containing protein	N/A	0	-0.693742	27.3498	NaN	26.8817	26.4303			7.008e-24	11	17.1	3	1	5	2	8.69827	8.1328	7.5611	8.41074	7.84222	44.918
TGGT1_310150;TGVEG_310150;TGME49_310150	AMP-binding enzyme domain-containing protein	N/A	0	0.31041	27.0419	27.7113	27.8822	27.4918			3.4688e-23	18	9.8	5	6	6	6	8.97936	8.16242	8.52956	8.45217	8.27066	95.963
TGGT1_310670;TGVEG_310670;TGME49_310670	glycogen phosphorylase 1, putative;putative glycogen phosphorylase 1	N/A	0	-0.086215	29.7717	29.8834	29.6452	29.8375			3.6404e-103	69	28.5	15	15	16	15	9.63867	8.93346	9.07126	9.06837	9.05881	105.46
TGGT1_310780;TGVEG_310780;TGME49_310780	dense granule protein GRA4	HMM: MQGTWFSLFVVVMVSHLACGG, NN: MQGTWFSLFVVVMVSHLACGG;HMM: MQGTWFSLFVVVMVSHLAFGG, NN: MQGTWFSLFVVVMVSHLAFGG	0	0.00475979	31.5108	31.4161	31.4936	31.4429			2.6412e-136	94	43.8	9	9	9	8	10.165	9.4384	9.66407	9.62752	9.48021	36.283
TGGT1_311230;TGVEG_311230;TGME49_311230	hypothetical protein;putative transmembrane protein	N/A	1	NaN	NaN	23.6018	NaN	NaN			2.3253e-05	2	0.5	1	1	0	0	7.67143	7.49333	7.1983	NaN	NaN	494.75
TGGT1_311430;TGVEG_311430;TGME49_311430	fibrillarin	N/A	0	-0.331875	29.8211	29.5449	29.3119	29.3904			1.8724e-30	27	41.9	6	8	8	6	9.56779	8.84138	9.02329	9.07085	8.88659	31.931
TGGT1_311470;TGVEG_311470;TGME49_311470	rhoptry neck protein RON5	HMM: MAEFTWRPLLMSLPKMIAFFHILLFSGALAA, NN: MAEFTWRPLLMSLPKMIAFFHILLFSGALAA	0	-0.105149	30.544	30.662	30.4863	30.5093			1.2022e-204	101	28.5	23	28	28	21	9.87441	9.17765	9.37225	9.34936	9.14351	186.97
TGGT1_311890;TGVEG_311890;TGME49_311890	hypothetical protein	N/A	0	-0.030015	27.2972	27.4993	27.3388	27.3977			1.2066e-38	18	20.3	4	3	5	4	8.92099	8.30589	8.22084	8.49962	8.17374	44.136
TGGT1_312110;TGVEG_312110;TGME49_312110	apicoplast-associated thioredoxin family protein Atrx1	HMM: MRHGPCFTCTHKFSCPSFLRNGVVSALALLFPKTAAV, NN: MRHGPCFTCTHKFSCPSFLRNGVVSALALLFPKTAAV	0	0.0393896	28.6984	28.5993	28.8454	28.5311			2.156e-44	24	17.5	7	8	6	4	9.3006	8.80814	8.82749	8.70246	8.25251	86.905
TGGT1_312150;TGVEG_312150;TGME49_312150	hypothetical protein;putative transmembrane protein	N/A	1	NaN	NaN	NaN	24.1923	NaN		+	1.2227e-30	5	10.2	0	1	1	3	8.46019	NaN	8.13723	7.42565	8.09597	60.669
TGGT1_312270;TGVEG_312270;TGME49_312270	rhoptry protein ROP13	HMM: MKRTELCIAALVAVGAFAF, NN: MKRTELCIAALVAVGAFAFTSPNAVAK	1	-0.118145	29.4134	28.9639	28.9164	29.2247			5.7446e-51	26	23.5	5	5	5	6	9.4464	8.65246	8.86085	8.88517	8.9306	44.729
TGGT1_314410;TGVEG_314410;TGME49_314410	aquarius, putative;putative aquarius	N/A	0	NaN	24.7825	NaN	NaN	NaN			7.3173e-07	2	0.8	1	1	0	0	7.46028	7.46028	NaN	NaN	NaN	250.65
TGGT1_315320;TGVEG_315320;TGME49_315320	SAG-related sequence SRS52A	HMM: MARISVVPIRLIMTGSLFFVVVVLMSTTALRAE, NN: MARISVVPIRLIMTGSLFFVVVVLMSTTALRAE;HMM: MARISVVPIRLITMGSLFFVVVVLMSTTALRAE, NN: MARISVVPIRLITMGSLFFVVVVLMSTTALRAE	1	0.0244036	29.4812	29.4107	29.7253	29.2154		+	4.7274e-68	26	30.4	5	3	6	3	9.54768	8.95169	8.82887	9.12756	8.79148	34.236
TGGT1_315740	SAG-related sequence SRS54	N/A	0	NaN	NaN	NaN	NaN	25.01		+	0.0005566	3	3.9	0	1	1	1	8.06111	NaN	7.54406	7.63814	7.56403	41.68
TGGT1_316255;TGVEG_316255;TGME49_316255	hypothetical protein	HMM: MLPFMSMGLFWKLFPAFGR, NN: MLPFMSMGLFWKLFPAFGR	0	0.0627947	26.9792	27.4397	27.3705	27.174			2.0413e-08	10	30.2	2	2	3	3	8.88948	7.94726	8.13694	8.51705	8.344	10.033
TGGT1_316400B;TGVEG_316400;TGME49_316400	alpha tubulin TUBA1;alpha-tubulin I, putative;putative alpha-tubulin I	N/A	0	-0.185448	32.5055	32.6853	32.3556	32.4643			1.9325e-234	131	62.3	12	14	12	12	10.4826	9.85847	9.91637	9.90493	9.83765	47.849
TGGT1_360830	nucleoside-triphosphatase	N/A	0	-0.107354	32.1265	31.6335	31.8054	31.7398			6.3369e-241	61	76.2	5	6	6	6	10.2799	9.58624	9.67655	9.69551	9.73921	40.518
TGGT1_363030;TGVEG_363030	rhoptry protein ROP2A;rhoptry protein ROP8	HMM: MENCASVRSSSCLIWLAAAFFVSALGH, NN: MENCASVRSSSCLIWLAAAFFVSALGH;HMM: MFSVLRNRNMRHGPSIGSSSCLIWLAAAFFVSALGH, NN: MFSVLRNRNMRHGPSIGSSSCLIWLAAAFFVSALGH;N/A	0;1	-0.0293694	32.539	32.492	32.3755	32.5967			5.5044e-120	185	42.8	19	19	18	20	10.4616	9.77172	9.91903	9.88299	9.8512	64.031
TGGT1_408800	NTPase	HMM: MWLPVYVPLLLVFGVSLSLPHGSLGT, NN: MWLPVYVPLLLVFGVSLSLPHGSLGT	0	NaN	NaN	NaN	NaN	30.2979			4.4016e-88	11	60.1	1	1	1	1	9.74353	9.05607	9.06296	9.25878	9.15585	20.959
TGGT1_410360	hypothetical protein;putative transmembrane protein	HMM: MWRIWRCRLSFLFATGCLLGALTAGLGS, NN: MWRIWRCRLSFLFATGCLLGALTA;N/A	0;1	-0.190704	31.7519	31.5528	31.4778	31.4455			2.6232e-107	70	40.1	7	6	6	6	10.1748	9.54235	9.61729	9.64684	9.46093	38.079
TGGT1_410370	hypothetical protein;putative transmembrane protein	HMM: MWRIWRCRLSFLFATGCLLGALTAGLGS, NN: MWRIWRCRLSFLFATGCLLGALTA;N/A	0;1;2	-0.145973	32.1228	32.0692	31.9783	31.9218			1.9471e-185	131	47.6	12	16	16	18	10.3205	9.60949	9.77846	9.79062	9.66916	47.738
TGGT1_411470	putative transmembrane protein	HMM: MWRIWRCRLSFLFVTGCLLGALTAGLGS, NN: MWRIWRCRLSFLFVTGCLLGALTA	1	NaN	NaN	27.0115	NaN	NaN			1.7889e-165	9	47.4	1	2	1	1	8.56713	7.86953	8.22469	7.86247	7.73579	40.32
TGGT1_411590;TGVEG_442670	nucleoside-triphosphatase	HMM: MWLPVYVPLLLVFGVSLSLPQGSLGT, NN: MWLPVYVPLLLVFGVSLSLPQGSLGT;N/A	0	-0.393297	30.5258	29.2488	29.6878	29.3001			3.9155e-208	21	61.9	4	3	2	3	9.61869	9.28156	8.96025	8.91316	8.70963	46.331
TGME49_203980;TGVEG_203980;TGGT1_203980	hypothetical protein	N/A	0	NaN	NaN	NaN	24.5153	24.7097			1.762e-10	7	1.7	1	2	2	2	8.11783	7.25237	7.7003	7.52528	7.47153	201.28
TGME49_206470;TGGT1_206470;TGVEG_206470	pyruvate dehydrogenase complex subunit PDH-E3II	N/A	0	-0.282017	29.6605	29.4481	29.3224	29.2221			9.6369e-56	44	28.1	10	8	9	7	9.52675	8.9964	8.93225	8.9962	8.71985	55.121
TGME49_209210;TGGT1_209210;TGVEG_209210B	hypothetical protein;putative KH domain protein	HMM: MCACFSCASSLAYIHLLWRTRRDLSICRQFGASASQFLLVFLFPGTLAE, NN: MCACFSCASSLAYIHLLWRTRRDLSICRQFGASASQFLLVFLFPGTLAE;N/A	0	NaN	NaN	23.6614	NaN	NaN			6.536e-09	2	2.2	2	1	0	0	7.69427	7.51863	7.21627	NaN	NaN	165.81
TGME49_209420;TGGT1_209420;TGVEG_209420	hypothetical protein	N/A	0	NaN	26.9924	NaN	NaN	NaN			4.6871e-05	3	8.8	2	0	1	0	8.32189	8.12551	NaN	7.88271	NaN	26.853
TGME49_211260;TGGT1_211260;TGVEG_211260	rhoptry kinase family protein ROP26 (incomplete catalytic triad)	N/A	0	0.111037	27.2478	27.8999	27.6749	27.6949			9.0208e-30	17	25.3	4	7	3	4	8.99846	8.08425	8.65015	8.24015	8.40548	47.826
TGME49_211420;TGVEG_211420;TGGT1_211420	RNA recognition motif-containing protein	N/A	0	-0.0785646	28.3007	28.7182	28.355	28.5068			4.7971e-33	14	36.8	4	2	4	2	9.25397	8.52419	8.64391	8.81652	8.56154	20.398
TGME49_212250;TGGT1_212250;TGVEG_462964	hypothetical protein;XPG N-terminal domain-containing protein	N/A	0	NaN	NaN	25.7044	NaN	NaN			4.1949e-11	8	7.7	4	2	2	1	8.28056	7.80658	7.83123	7.61098	7.25768	86.944
TGME49_213050;TGGT1_213050;TGVEG_213050	hypothetical protein	N/A	0	0.0386534	27.3671	27.5643	27.5044	NaN			1.7382e-13	8	20.3	3	2	2	1	8.90647	8.35324	8.42689	8.22552	8.16253	21.191
TGME49_214200;TGGT1_214200;TGVEG_214200	WD domain, G-beta repeat-containing protein	N/A	0	NaN	NaN	NaN	NaN	23.6691			4.8775e-05	1	1.4	0	0	0	2	7.16041	NaN	NaN	NaN	7.16041	150.52
TGME49_214770;TGGT1_214770;TGVEG_214770	putative small GTP binding protein rab1a;small GTP binding protein rab1a, putative	N/A	0	-0.229743	28.2286	27.4346	27.7568	27.447			3.0132e-46	17	47.5	3	4	2	3	9.02963	8.31721	8.49872	8.48004	8.39042	22.88
TGME49_214880;TGGT1_214880	hypothetical protein	N/A	0	NaN	NaN	NaN	20.9668	NaN			0.00066979	2	1.2	1	0	1	0	6.80778	6.55325	NaN	6.45465	NaN	98.373
TGME49_215550	hypothetical protein	HMM: MRLAATPGGAYSARRIFSIAPVSALPGSPGV, NN: MRLAATPGGAYSARRIFSIAPVSAL	0	NaN	NaN	23.9964	NaN	NaN			0.0076143	1	0.8	0	1	0	0	7.31706	NaN	7.31706	NaN	NaN	171.37
TGME49_218780;TGGT1_218780;TGVEG_218780	phosphoserine aminotransferase, putative;putative phosphoserine aminotransferase	N/A	0	0.0289927	29.9706	29.6588	29.7948	29.8927			1.1096e-181	46	35.1	9	8	11	9	9.66056	8.98789	9.02193	9.17765	9.01995	52.754
TGME49_219520;TGGT1_219520;TGVEG_219520	histone arginine methyltransferase PRMT1	N/A	0	-0.36754	27.8307	27.7458	27.5113	27.3301			1.1617e-50	18	24.2	5	4	4	2	8.97364	8.56627	8.38259	8.34388	8.04407	44.029
TGME49_221170;TGGT1_221170	CAAX metallo endopeptidase	N/A	2;3;5	NaN	26.9583	27.1462	NaN	NaN			4.9584e-09	6	9.3	2	1	1	1	8.66785	8.14517	8.23717	8.06446	7.56934	49.432
TGME49_221522;TGGT1_221522;TGVEG_221522	adaptor complexes medium subunit family protein	N/A	0	-0.535367	26.8271	27.6351	26.5848	26.8067			3.5725e-12	11	10.5	4	2	4	4	8.80393	8.22466	8.14	8.28021	8.14696	61.127
TGME49_223590;TGGT1_223590;TGVEG_223590	proteasome subunit	HMM: MKNYRCERFSCLLFACAVCPSTLR, NN: MKNYRCERFSCLLFACAVCPSTLRKHQVTFCGIWSRFELVVFAA;HMM: MKNYRCGRFSCLLFACAVCPSTLR, NN: MKNYRCGRFSCLLFACAVCPSTLRKHQVTFCGIWSRFELVVFAA	0	-0.165835	29.177	29.4412	29.084	29.2025			5.693e-38	20	21.1	4	5	5	6	9.47211	8.74787	8.91791	8.89643	8.89786	39.397
TGME49_224850;TGVEG_224850;TGGT1_224850	polyadenylate binding protein, putative;putative polyadenylate binding protein	N/A	0	-0.116972	30.8367	30.7958	30.6756	30.7229			3.0012e-95	73	23.7	10	13	14	13	9.93262	9.29195	9.39475	9.38525	9.22907	82.572
TGME49_225050;TGGT1_225050;TGVEG_225050;TGME49_326800	adenosylhomocysteinase, putative;putative adenosylhomocysteinase;S-Adenosyl homocysteine hydrolase	HMM: DALLRSSVSWLSRRDARRSPWWCTVMALTWGEGA, NN: DALLRSSVSWLSRRDARRSPWWCTVMALTWGEGAGP;HMM: MRALFLSQESDGFLSPLCFLPGSPSSSF, NN: MRALFLSQESDGFLSPLCFLPGSPSSSFPHILQKRQPFLSLFLFAKTSQSRGR;N/A	0	-0.163767	31.8627	31.8718	31.7222	31.6847			5.4695e-113	102	38.6	18	15	16	13	10.2429	9.67332	9.66427	9.6844	9.52265	64.105
TGME49_226410;TGGT1_226410;TGVEG_226410	EF-1 guanine nucleotide exchange domain-containing protein	HMM: MRAAAKSLPSRWSSVRLRCEKVPACFCATSSPPGGRST, NN: MRAAAKSLPSRWSSVRLRCE;N/A	0	-0.206606	31.852	31.604	31.5641	31.4788			1.9658e-115	58	46	10	12	10	10	10.2005	9.55343	9.65497	9.66784	9.49396	36.049
TGME49_226860;TGVEG_226860;TGGT1_226860	SAG-related sequence SRS67	HMM: MAFRKPLFSGRQWVALMCVFAAVGGK, NN: MAFRKPLFSGRQWVALMCVFAAVGGK;HMM: MGFRKPVFSGRQWVALMCVFAAVGGK, NN: MGFRKPVFSGRQWVALMCVFAAVGGK	0;1	NaN	NaN	NaN	26.7565	NaN		+	4.7833e-10	4	15.7	1	1	2	0	8.41537	7.9222	7.27983	8.19753	NaN	23.135
TGME49_229360;TGGT1_229360;TGVEG_229360	transaldolase	N/A	0	-0.116761	29.7996	29.9627	29.6504	29.8784			2.1579e-59	42	26.5	8	7	8	7	9.65298	8.99167	9.11317	9.11321	8.9643	61.447
TGME49_231960;TGVEG_231960B	omega secalin, putative;putative omega secalin	HMM: MKVRSVLSVGFWAAACVAF, NN: MKVRSVLSVGFWAAACVAF;N/A	0	0.316477	28.0147	28.1683	28.408	NaN			4.3159e-39	13	6	5	6	6	2	9.08433	8.40748	8.60636	8.68422	7.85443	201.9
TGME49_236210;TGGT1_236210;TGVEG_236210A	peptidase M16 family potein, putative;putative peptidase M16 family potein	HMM: MMFRFLPRVASGASSLSVSQRRLRASFSSSLQSRGFFSAAPAAATAGVSPLARSVDAA, NN: MMFRFLPRVASGA;N/A	0	-0.0840769	30.3919	30.3303	30.2128	30.3413			1.4565e-71	57	36.5	11	12	11	12	9.79963	9.14248	9.21688	9.25765	9.16388	56.915
TGME49_237130;TGME49_322210;TGME49_330000	apocytochrome b, putative;cytochrome b;cytochrome b, putative	HMM: MSLFRAHLVFYRCALNLNSSYNFGFLVAMTFVLQIITGITLAF, NN: MSLFRAHLVFYRCALNLNSSYNFGFLVAMTFVLQIITGITLAF;HMM: MVSRTLSLSMSLFRAHLVFYRCALNLNSSYNFGFLVAMTFVLQIITGITLAF, NN: MVSRTLSLSMSLFRAHLV	4;6;8	NaN	26.4528	NaN	NaN	NaN			0.00012499	3	16.7	2	0	1	0	8.31721	7.96307	NaN	8.06348	NaN	17.641
TGME49_244320	ribosomal protein RPL24	N/A	0	-0.0296907	31.4045	31.4015	31.3543	31.3923			1.9004e-31	49	19.6	6	7	7	6	10.1245	9.463	9.53217	9.60192	9.47896	32.693
TGME49_244650;TGGT1_244650;TGVEG_244650	eukaryotic initiation factor-5, putative;putative eukaryotic initiation factor-5	N/A	0	-0.0943518	27.1962	27.9444	27.3935	27.5584			3.2897e-17	11	17.1	3	5	3	3	8.97422	8.1285	8.60561	8.36277	8.2408	46.803
TGME49_247760;TGGT1_247760;TGVEG_247760	AMP-binding enzyme domain-containing protein	N/A	0	0.0204535	26.5555	27.2399	26.8463	26.9901			1.7012e-20	14	11.3	4	5	3	5	8.77146	8.10789	8.34451	7.95112	8.18244	86.986
TGME49_254570;TGGT1_254570;TGVEG_254570	hypothetical protein	N/A	0	NaN	NaN	24.905	NaN	NaN			0.0046284	1	0.5	0	1	0	0	7.59057	NaN	7.59057	NaN	NaN	221.18
TGME49_263060;TGVEG_263060B;TGGT1_263060	proteasome/cyclosome repeat protein;Proteasome/cyclosome repeat-containing protein	HMM: MSAGAVTAQPLPSPKAGLGAAMAFAPPASSAA, NN: MSAGAVTAQPLPSPKAGLGAAMAFAPPASSAA;N/A	0	0.0855532	27.9525	28.6502	28.3562	28.4176			2.1387e-66	29	15.9	5	8	8	6	9.22037	8.35305	8.78642	8.67156	8.5497	125.59
TGME49_263810;TGGT1_263810;TGVEG_263810	hypothetical protein;putative transmembrane protein	N/A	1	NaN	NaN	NaN	NaN	26.2524			1.6789e-06	2	11.3	0	1	0	1	8.25452	NaN	7.96842	NaN	7.93804	23.635
TGME49_269885;TGVEG_269885A;TGGT1_269885A	rhoptry metalloprotease toxolysin TLN1	HMM: MKQGTTRPRVGLTGAVLLLVVWTVAILIDCSSGS, NN: MKQGTTRPRVGLTGAVLLLVVWTVAILIDCSSGS;N/A	0;1	-0.13031	28.2708	28.6054	28.1704	28.4451			4.3611e-55	30	12.2	7	8	9	10	9.21654	8.45603	8.63783	8.64919	8.68167	182.01
TGME49_273130;TGGT1_273130;TGVEG_273130	SAG-related sequence SRS30A	N/A	0	-1.0962	NaN	26.3243	25.2281	NaN		+	7.7236e-24	7	12.2	1	2	3	1	8.36037	7.69756	7.82065	7.9879	7.20464	38.496
TGME49_275650;TGGT1_275650;TGVEG_275650	hypothetical protein	N/A	0	0.142892	30.0397	30.6961	30.4429	30.5787			2.7679e-219	106	44.1	19	21	23	21	9.85067	9.00009	9.33985	9.33234	9.24396	101.16
TGME49_279420;TGGT1_279420;TGVEG_279420	hypothetical protein;Tsp1 domain TSP12 (precursor)	N/A	0	0.139757	27.4166	27.7142	27.6077	27.8026			3.8956e-29	20	9.3	4	6	5	4	8.99492	8.24829	8.5155	8.38539	8.38135	144.94
TGME49_280380;TGGT1_280380;TGVEG_280380	poly(ADP-ribose) glycohydrolase	HMM: MECHVVRLLVSLLILVPCVCMAQ, NN: MECHVVRLLVSLLILVPCVCMAQ	1	-0.0835466	31.8093	31.6756	31.6395	31.6783			3.6076e-88	114	39.8	18	16	18	14	10.2164	9.63089	9.63557	9.67013	9.50292	61.836
TGME49_283702;TGVEG_283702;TGGT1_283702	FATC domain-containing protein	HMM: MTLCLVCFAGHAGLCARALRRVAEVAVLLLSLLGPLLPVAVSPSATAA, NN: MTLCLVCFAGHAGLCARALRRVAEVAVLLLSLLGPLLPV;HMM: MTLCLVCFTGHAGLCARALRRVAEVAVLLLSLLGPLLPVAVFPSATAA, NN: MTLCLVCFTGHAGLCARALRRVAEVAVLLLSLLGPLLPV	0;1	NaN	NaN	NaN	NaN	24.8795			0.0057307	3	0.1	1	1	1	1	8.09875	7.40061	7.4464	7.59054	7.52475	646.92
TGME49_283780;TGGT1_283780;TGVEG_283780	glucose-6-phosphate isomerase GPI	HMM: MGARAFRGGRRPSMREVSCATVHCARAVCLAATRCRFSRTRGRCRVPLKLAVCALFFFSEVLLT, NN: MGARAFRGGRRPSMREVSCATVHCARAV;HMM: MGARAFRGGRRPSMREVSCATVHCARAVCLAATRCRFSRTRGRCRVPLKLAVCALFFLSEVLLT, NN: MGARAFRGGRRPSMREVSCATVHCARAV	1	0.163827	28.2134	28.7206	28.5836	28.6781			6.7304e-47	27	20.3	6	6	7	5	9.27674	8.57243	8.71522	8.79882	8.56733	74.384
TGME49_286080;TGGT1_286080;TGVEG_327100	elongation factor 2 family protein;putative U5 small nuclear ribonuclear protein	N/A	0	-0.127693	NaN	26.6998	26.5721	NaN			1.8608e-29	10	11.3	2	4	4	2	8.59897	7.75355	8.14026	8.13152	7.82593	113.34
TGME49_288500;TGGT1_288500;TGVEG_288500	FAD Malate-dehydrogenase (MDH-FAD)	HMM: MAAALRFLNTALTTSRPLFASGS, NN: MAAALRFLNTALTTSRPLFAS	0	-0.198478	29.831	29.8157	29.5184	29.7313			1.0283e-31	45	26.7	10	10	9	9	9.62094	8.94225	9.07214	9.04234	9.00817	60.38
TGME49_289300;TGGT1_289300;TGVEG_289300	methionyl-tRNA synthetase	N/A	0	-0.164159	29.0429	29.1337	28.9394	28.9089			1.9174e-54	37	18.9	9	10	9	8	9.40062	8.81907	8.87924	8.78086	8.6948	106.1
TGME49_290005;TGGT1_290005;TGVEG_290005	proteasome subunit beta type 1, putative;putative proteasome subunit beta type 1	HMM: MHALRTQAHTWKKTRRTRLSRQRKRSNFVTLCFFVLLEIRPSELI, NN: MHALRTQAHTWKKTRRTRLSRQRKRSNFVTLCFFVLLEIRPSELI;HMM: MHAPRTQAHTWKKTRRTRLSRQRKRSNFVTLCFFVLLEIRPSELI, NN: MHAPRTQAHTWKKTRRTRLSRQRKRSNFVTLCFFVLLEIRPSELI	1	0.00460625	28.499	28.1102	28.3092	NaN			2.4233e-47	13	23.4	4	4	4	2	9.13427	8.6977	8.35106	8.65114	8.28219	39.915
TGME49_290290;TGGT1_290290;TGVEG_290290	ubiquitin-activating enzyme E1 family protein	N/A	0	0.0114269	29.9473	30.0044	29.8737	30.1007			2.4928e-124	67	29.1	17	14	16	11	9.69812	9.05793	9.10677	9.16301	9.04657	119.81
TGME49_290640;TGGT1_290640;TGVEG_290640	DNA mismatch repair protein MSH6-1, putative;putative DNA mismatch repair protein MSH6-1	N/A	0	NaN	NaN	NaN	NaN	24.8391			0.00036876	2	1.2	0	2	1	2	8.11197	NaN	7.78358	7.55757	7.51258	171.08
TGME49_292080;TGVEG_292080;TGGT1_292080	leucyl-tRNA synthetase	N/A	0	-0.0039053	30.208	30.3505	30.3093	30.2414			4.8477e-137	72	28.7	15	21	20	16	9.79635	8.99546	9.26314	9.32164	9.12616	141.14
TGME49_292220;TGVEG_292220;TGGT1_292220	PCI domain-containing protein	HMM: MAQDATAAPPAGAAGAAEKKSAASSPLLTLCIAVEQLRQGVEQQ, NN: MAQDATAAPPAGAAGAAEKKSAASSPLLTLCIAVEQLRQGVEQQ;HMM: MAQDATAAPPAGAAGAAGAAEKKSAASSPLLTLCIAVEQLRQGVEQQ, NN: MAQDATAA	0	-0.213601	28.5662	28.4636	28.1944	28.4082			8.8815e-55	27	26.7	5	8	9	6	9.23244	8.47109	8.71128	8.72363	8.56627	61.439
TGME49_297810;TGGT1_297810;TGVEG_297810	hypothetical protein	N/A	0	0.0337582	28.0277	28.1238	28.016	28.203			2.5066e-40	24	34.2	4	5	5	5	9.14051	8.27793	8.59455	8.68028	8.50556	29.568
TGME49_301180;TGGT1_301180;TGVEG_301180;TGME49_301170;TGGT1_301170	SAG-related sequence SRS19B;SAG-related sequence SRS19C;SAG-related sequence SRS19D;SAG-related sequence SRS19F	HMM: MAKTQELRRLGGGFRAKASKLMAVCMGGFVLLSSGQTVAE, NN: MAKTQELRRLGGGFRAKASKLMAVCMGGFVLLSSGQTVAE;HMM: MAKTQKLRRLGGGFRAKASKLMAVCMGGFVLLSSGQTVAE, NN: MAKTQKLRRLGGGFRAKASKLMAVCMGGFVLLSSGQTVAE;HMM: MARTQKMRRLGGWFRSRVSKLMTICFSGVALFSAGQAVAE, NN: MARTQKMRRLGGWFRSRVSKLMTICFSGVALFSAGQAVAE;HMM: MARTQMTRRLGGGFRPRASKLMAICLGGIALFSTGEAV, NN: MARTQMTRRLGGGFRPRASKLMAICLGGIALFSTGEAV;HMM: MLTAQTTRRVDGRIRPRVTAVMAICMGGVL…	0;1	NaN	26.2191	NaN	NaN	NaN		+	1.1844e-10	6	12.8	3	2	1	2	8.36553	7.89272	7.81212	7.44877	7.78476	40.974
TGME49_308090	rhoptry protein ROP5	HMM: MATKLARLATWLVLVGCLLWRAGAV, NN: MATKLARLATWLVLVGCLLWRAGAV	0	-0.313191	30.592	30.4232	30.1333	30.2555			8.3924e-172	32	37.7	4	5	3	4	9.80778	9.20058	9.27609	9.18509	9.15131	61.101
TGME49_310010;TGGT1_310010;TGVEG_310010A	rhoptry neck protein RON1	HMM: MARSSRAAPSGAFAHGVAKASFTWISGMKTPFGCVFFFCLIALWGFSAAL, NN: MARSSRAAPSGAFAHGVAKASFTWISGMKTPFGCVFFFCLIALWGFSAAL	1	0.183135	27.56	27.0683	27.6664	27.3281		+	2.5926e-78	16	13	2	4	3	3	8.93513	8.26102	8.40953	8.46082	8.12437	127.43
TGME49_310430;TGGT1_310430B;TGVEG_310430B;TGVEG_310430A;TGGT1_310430A	Hsp90 domain-containing protein	N/A	0	NaN	25.0098	NaN	NaN	NaN			6.6904e-05	0	2.4	2	0	0	1	7.63732	7.52869	NaN	NaN	6.98232	120.78
TGME49_313410;TGGT1_313410;TGVEG_313410A	proteasome 26S regulatory subunit	HMM: VDSSLPVECSAFAAVSLGLVFVGSCNQE, NN: VDSSLPVECSAFAAVSLGLVFVGSCNQEAAEAI;N/A	0	-0.294175	29.0987	28.8937	28.4767	28.9273			4.2132e-77	35	22.5	9	11	11	8	9.37203	8.62808	8.81497	8.92769	8.6343	117.71
TGME49_317720;TGGT1_317720;TGVEG_317720B	eukaryotic translation initiation factor 3 subunit 7, putative;putative eukaryotic translation initiation factor 3 subunit 7	N/A	0	-0.0529833	30.8922	31.105	31.0083	30.883			2.1192e-111	74	37.6	17	13	15	12	9.99893	9.33971	9.45076	9.47069	9.30317	68.766
TGME49_318230;TGGT1_318230;TGVEG_318230	phosphoglycerate kinase PGKI	N/A	0	-0.143322	32.2278	32.3798	32.188	32.133			9.4846e-207	143	73.6	20	19	21	21	10.3766	9.72838	9.77848	9.84351	9.73792	44.676
TGME49_319530;TGVEG_319530;TGGT1_319530	splicing factor SF2	N/A	0	-0.148638	27.0639	27.1345	26.9665	26.9346			1.1298e-13	14	11.8	4	4	3	2	8.80236	8.32135	8.19019	8.25327	7.95753	53.353
TGME49_319560;TGGT1_319560;TGVEG_319560;TGME49_325800	EGF family domain-containing protein;microneme protein MIC3	HMM: MRGGTSALLHALTFSGAVWMCTPAEAL, NN: MRGGTSALLHALTFSGAVWMCTPAEAL	0	-0.614787	30.1081	29.6775	29.3715	29.1845			4.9211e-66	28	32.1	8	7	6	6	9.58444	9.07558	9.12228	8.89878	8.72722	40.528
TGME49_320020;TGGT1_320020;TGVEG_320020	transporter, major facilitator family protein	N/A	12	0.216988	28.908	28.0835	28.646	28.7795			6.3102e-48	13	16.3	2	3	4	2	9.30099	8.64397	8.56777	8.91467	8.56588	62.981
TGME49_320570;TGGT1_320570;TGVEG_320570	elongation factor Tu, putative;putative elongation factor Tu	N/A	0	0.120925	28.0326	27.8792	28.2423	27.9114			2.9528e-28	14	17.7	5	3	4	4	9.10061	8.58977	8.25681	8.59837	8.46917	63.549
TGME49_320630;TGGT1_320630;TGVEG_320630	phosphotransferase enzyme family protein	HMM: MQVLACVLGIVCLYLRTAPAS, NN: MQVLACVLGIVCLYLRTAPAS	0	-0.25013	28.6592	28.714	28.5254	28.3475			3.2415e-33	20	23.2	8	7	5	5	9.26616	8.73461	8.77725	8.61064	8.47156	69.383
TGME49_321520;TGVEG_321520;TGGT1_321520	CS domain protein;hypothetical protein	N/A	0;1	-0.115703	28.4166	29.2334	28.5154	28.9033			1.8845e-33	23	19.9	3	2	2	2	9.3467	8.57401	8.83329	8.78618	8.74385	24.783
TGVEG_200250;TGGT1_200250;TGME49_200250	microneme protein MIC17A;microneme protein MIC17B;microneme protein MIC17C;PAN domain protein;PAN/Apple domain-containing protein;putative microneme protein	HMM: MDALKTLLNKGITLAVVVAAVLLQIRAVALQ, NN: MDALKTLLNKGITLAVVVAAVLLQIRAV;HMM: MDALKTLLNKGITLAVVVAAVLLQIRAVALQ, NN: MDALKTLLNKGITLAVVVAAVLLQIRAVALQ;HMM: MDALKTVFNRRIALPVVVAAALLHNSAEAL, NN: MDALKTVFNRRIALPVVVAAALLHNSAEAL;HMM: MDTVTTLFNRKIALSFVVAAALLHNSAEAL, NN: MDTVTTLFNRKIALSFVVAAALLHNSAEAL;HMM: MDTVTTLFNRKIALSFVVVAALLHNSAEAL, NN: MDTVTTLFNRKIALSFVVVAALLHNSAEAL;HMM: METVTTLFNRKIALSFVVAAALLHNSAEAL, N…	0;1	-0.273267	29.1434	28.7778	28.6574	28.7172			6.2134e-36	25	28.8	7	5	7	4	9.34873	8.85772	8.67633	8.84414	8.52949	38.806
TGVEG_200360;TGGT1_200360	hypothetical protein	HMM: MMLIALVCMLVHRLDLGAAV, NN: MMLIALVCMLVHRLDLGAAV	0	-0.0296211	29.739	29.7856	29.7319	29.7335			4.4118e-57	38	47.8	6	4	5	4	9.62203	9.07635	8.96049	9.03767	8.99669	20.245
TGVEG_201380;TGME49_201380;TGGT1_201380	chorismate synthase, putative;putative chorismate synthase	N/A	0	NaN	NaN	NaN	NaN	23.9025			6.4154e-10	1	6.5	1	0	1	1	7.86596	7.10394	NaN	7.64081	7.23065	58.088
TGVEG_201390;TGGT1_201390	hypothetical protein;putative transmembrane protein	HMM: MKTLHLLLFAVVAIALCGLATAS, NN: MKTLHLLLFAVVAIALCGLATAS	2	NaN	NaN	NaN	NaN	27.439			2.8513e-16	8	13.9	1	1	1	1	8.9489	8.22248	8.26404	8.53284	8.29522	11.329
TGVEG_201700;TGME49_201700;TGGT1_201700	WD domain, G-beta repeat-containing protein	N/A	0	0.0625076	28.3094	27.8704	28.1332	28.1716			1.1019e-40	15	13.3	4	4	4	3	9.14292	8.45591	8.58316	8.6204	8.48253	67.411
TGVEG_201780;TGGT1_201780;TGME49_201780	microneme protein MIC2	HMM: MRLQREAVFGLMFACGMWMWPSEVAGG, NN: MRLQREAVFGLMFACGMWMWPSEVAGG	1	-0.121281	31.732	31.9437	31.78	31.6531			3.893e-136	110	24.3	10	13	14	13	10.257	9.52243	9.73825	9.74327	9.57184	82.619
TGVEG_201800;TGME49_201800;TGGT1_201800	hypothetical protein;putative RNA-binding protein	HMM: MALNRVPSRVLPFAVSGVYVHPRNACRLPAAAAVSSVPSSVSAF, NN: MALNRVPSRVLPFAVSGVYVHPRNAC	0	-0.00580311	27.1314	27.1792	27.2381	27.061			8.5118e-12	8	15.4	3	3	2	2	8.8532	8.08063	8.39424	8.306	8.15412	28.508
TGVEG_201880;TGME49_201880;TGGT1_201880	hypothetical protein;ubiquinol-cytochrome C family reductase UQCRX/QCR9-like protein	N/A	0	NaN	NaN	24.8147	NaN	NaN			0.00036253	4	13.3	0	2	1	1	7.97543	NaN	7.56339	7.52492	7.38771	15.269
TGVEG_202200;TGGT1_202200;TGME49_202200	hypothetical protein	N/A	0	0.0405092	26.5523	26.4734	NaN	26.5534			2.4649e-08	9	6.1	3	2	1	3	8.58157	8.12801	7.89809	7.83512	7.9991	87.161
TGVEG_202300;TGME49_202300;TGGT1_202300	inosine triphosphate pyrophosphatase, putative;putative inosine triphosphate pyrophosphatase	N/A	0	NaN	NaN	NaN	NaN	23.3503			0.007423	0	6.3	0	0	0	1	7.06442	NaN	NaN	NaN	7.06442	24.247
TGVEG_202370;TGME49_202370;TGGT1_202370	putative T-complex protein 1, epsilon subunit (TCP-1-epsilon);T-complex protein 1, epsilon subunit (TCP-1-epsilon), putative	N/A	0	0.0813599	28.5694	28.9021	28.8849	28.7493			2.0043e-89	26	32.6	8	4	6	5	9.32822	8.82799	8.62305	8.7733	8.64651	58.631
TGVEG_202380;TGME49_202380;TGGT1_202380	putative rab GDI alpha;rab GDI alpha, putative	N/A	0	0.244452	27.23	27.664	27.8066	27.5762			8.0856e-32	14	16.2	3	3	3	4	8.97545	8.31192	8.33201	8.45332	8.38229	51.021
TGVEG_202390;TGGT1_202390;TGME49_202390	S15 sporozoite-expressed protein	N/A	0	NaN	NaN	NaN	26.0695	NaN			6.6048e-14	4	8.3	0	2	3	0	8.10887	NaN	7.48578	7.99073	NaN	61.897
TGVEG_202500;TGME49_202500;TGGT1_202500	GAPM1a	N/A	6	NaN	NaN	NaN	NaN	28.4941			1.9656e-26	12	5.2	1	1	1	1	9.23621	8.42854	8.63224	8.76782	8.64321	33.534
TGVEG_202530;TGME49_202530;TGGT1_202530	aspartate-tRNA ligase	N/A	1	-0.162465	28.5634	28.2665	27.9891	28.5159			6.1032e-45	34	22	8	6	8	7	9.19184	8.75923	8.44107	8.58035	8.511	86.762
TGVEG_202680;TGGT1_202680;TGME49_202680	peptidase M16, alpha subunit, putative;putative peptidase M16, alpha subunit	HMM: MNASILFRRNAPGVSTCLRRRCLRPAALAAASASGVSTPASGV, NN: MNASILFRRNAPGVSTCLRRRCLRPAALA	0	0.148969	29.8545	30.1157	30.2341	30.0341			3.6319e-50	40	27.9	10	8	6	8	9.72491	9.08232	9.20688	9.1782	8.99191	62.161
TGVEG_202770;TGME49_202770;TGGT1_202770	RNA recognition motif-containing protein	N/A	0	-0.159123	27.8228	28.3797	27.9284	27.9559			2.476e-36	17	22.4	4	5	4	4	9.11474	8.34066	8.72519	8.42648	8.4552	55.868
TGVEG_202820;TGME49_202820;TGGT1_202820	ubiquitin-conjugating enzyme subfamily protein	N/A	0	NaN	NaN	NaN	NaN	25.9573			3.873e-05	5	13.1	1	1	1	2	8.34242	7.16953	7.85664	7.79707	7.84918	18.932
TGVEG_202830;TGME49_202830;TGGT1_202830	Elicitor-responsive protein, putative;putative Elicitor-responsive protein	HMM: MRRCLSFCRRETRWIKTHGISSIFVVSVHSA, NN: MRRCLSFCRRETRWIKTHGISSIFVVSVHSA;HMM: MRRCLSFCRRETRWIKTHGISSIFVVSVHSAVLTVVTLR, NN: MRRCLSFCRRETRWIKTHGISSIFVVSVHSA;HMM: MRRCLSFCRRETRWIKTHGISSIFVVSVQSAVLTVVTLR, NN: MRRCLSFCRRETRWIKTHGISSIFVVSVQSA	0;1	-0.123869	NaN	28.1217	NaN	27.9978			2.3322e-12	5	16.3	2	4	1	2	8.95276	7.96621	8.6166	8.1617	8.39041	33.057
TGVEG_203170;TGGT1_203170;TGME49_203170	OB-fold nucleic acid binding domain-containing protein	N/A	0	NaN	NaN	NaN	NaN	26.1455			6.2555e-06	2	3.6	1	0	0	1	8.08543	7.61524	NaN	NaN	7.90584	81.219
TGVEG_203370;TGME49_203370;TGGT1_203370	Dip2/Utp12 family protein;hypothetical protein	N/A	0	NaN	NaN	23.5593	NaN	NaN			1.1534e-05	2	3.2	0	1	0	1	7.3805	NaN	7.18549	NaN	6.93889	81.163
TGVEG_203390;TGME49_203390;TGGT1_203390	CRAL/TRIO domain-containing protein	N/A	0	NaN	NaN	NaN	24.1216	NaN			0.0015265	3	4.8	0	1	1	1	7.95311	NaN	7.52356	7.40435	7.49147	50.45
TGVEG_203450;TGME49_203450;TGGT1_203450	DUF3228 domain-containing protein	HMM: MAALWTTRVICFSCFFLLFVSLSAPTQGE, NN: MAALWTTRVICFSCFFLLFVSLSAPTQGE;HMM: MAALWTTRVICFSCFFLLLVSLSAPTQGE, NN: MAALWTTRVICFSCFFLLLVSLSAPTQGE	0	0.0130539	26.7858	26.8625	26.9404	26.734			4.0389e-23	10	13.5	3	3	2	3	8.74146	8.11327	8.21767	8.02181	8.18004	50.587
TGVEG_203490;TGGT1_203490;TGME49_203490	GNL3L/Grn1 GTPase	N/A	0	NaN	NaN	25.1045	NaN	NaN			1.5979e-07	2	4.6	0	2	0	1	7.833	NaN	7.65064	NaN	7.36818	76.191
TGVEG_203600;TGGT1_203600;TGME49_203600	hypothetical protein;putative transmembrane protein	HMM: MILSTERMNRPGCHRASRNGGRAFFFLLLVSLSYFFLWSQ, NN: MILSTERMNRPGCHRASRNGGRAFFFLLLVSLSYFFLWSQ	1	0.541638	28.1616	28.8839	28.9724	29.1564			4.9329e-56	25	27.1	6	5	6	4	9.35984	8.66196	8.81645	8.87175	8.63469	47.289
TGVEG_203630;TGME49_203630;TGGT1_203630	ribosomal protein RPL44	N/A	0	-0.122758	30.0913	29.7618	29.7808	29.8268		+	5.7184e-17	19	41	4	5	3	3	9.66582	9.0664	9.10168	9.15125	8.89585	12.062
TGVEG_203990;TGGT1_203990;TGME49_203990	rhoptry protein ROP12	HMM: MARVLPCVFLVAYLSCFLLAGELTHTTAL, NN: MARVLPCVFLVAYLSCFLLAG	1	-0.15508	28.0708	27.1703	27.7445	27.1864			1.8501e-29	10	20.8	3	2	2	3	8.9707	8.47985	8.22513	8.43708	8.28183	25.444
TGVEG_204020;TGME49_204020;TGGT1_204020	ribosomal protein RPL8	N/A	0	-0.120804	32.5759	32.6258	32.4518	32.5083			4.1893e-66	87	42.3	10	10	9	10	10.514	9.88576	9.94557	9.945	9.86552	28.254
TGVEG_204340;TGME49_204340;TGGT1_204340	hypothetical protein;putative transmembrane protein	HMM: MKPSSLRILLVAWTIISDAE, NN: MKPSSLRILLVAWTIISDAE	1	-0.19537	28.2121	28.2375	28.1282	27.9307			1.0336e-32	19	12.5	5	4	6	4	9.14987	8.42475	8.57838	8.70298	8.41951	97.297
TGVEG_204400;TGME49_204400;TGGT1_204400	ATPase synthase subunit alpha, putative;putative ATPase synthase subunit alpha	HMM: MTIHSCLARRAVSVAASGARAFAS, NN: MTIHSCLARRAVSVAASGARAFAS	0	-0.200491	30.7398	30.776	30.503	30.6118			1.1857e-79	56	35.7	10	9	10	8	9.9023	9.27905	9.33005	9.36509	9.21168	62.076
TGVEG_204480;TGME49_204480;TGGT1_204480	thioredoxin domain-containing protein	N/A	0	-0.318594	27.1333	27.1062	26.5176	27.0847			6.2591e-17	11	11.5	3	4	4	3	8.7961	8.11604	8.32658	8.20019	8.09342	72.163
TGVEG_204530;TGME49_204530;TGGT1_204530	microneme protein MIC11	HMM: MQLKKLSVVSITLLGLFKFVNGV, NN: MQLKKLSVVSITLLGLFKFVNGV	0	0.118067	32.2926	32.538	32.3833	32.6835			8.49e-82	90	60.8	11	12	11	10	10.4511	9.78474	9.89551	9.87888	9.82837	22.432
TGVEG_205010;TGME49_205010;TGGT1_205010	putative U2 small nuclear ribonucleoprotein family protein;U2 small nuclear ribonucleoprotein family protein, putative	N/A	0	-0.676678	NaN	25.6057	NaN	24.929			6.5825e-16	5	4	0	3	0	3	7.99538	NaN	7.85191	NaN	7.44458	150.87
TGVEG_205240;TGME49_205240;TGGT1_205240	cleft lip and palate transmembrane protein 1 (clptm1) protein	N/A	4	NaN	NaN	NaN	NaN	23.461			0.0013636	4	1.1	1	1	1	1	7.81503	7.16152	7.34692	7.20569	7.09774	88.893
TGVEG_205320;TGME49_205320;TGGT1_205320	hypothetical protein;putative serine-rich adhesin for platelets family protein	N/A	0	NaN	NaN	NaN	27.7696	NaN			2.4085e-06	6	8.5	1	1	2	1	8.91377	8.17289	8.19165	8.50251	8.29555	70.808
TGVEG_205340;TGME49_205340;TGGT1_205340	ribosomal protein RPS12	N/A	0	-0.403014	30.1328	30.7585	30.0753	30.01			1.1856e-26	25	64.8	4	4	4	4	9.79067	9.10377	9.37967	9.18398	8.99169	15.399
TGVEG_205350;TGME49_205350;TGGT1_205350	integral membrane protein, GNS1/SUR4 family protein, putative;putative integral membrane protein, GNS1/SUR4 family protein	N/A	7	0.219925	NaN	26.378	26.5979	NaN			2.7956e-09	6	15.4	2	2	2	2	8.71013	8.26236	8.02983	8.15333	7.90634	37.794
TGVEG_205380;TGME49_205380;TGGT1_205380	fructose-bisphospatase I	N/A	0	0.0626869	28.5602	28.9426	28.8223	28.8059			1.0168e-23	25	19.8	6	5	5	6	9.33844	8.63469	8.77531	8.76884	8.75233	42.245
TGVEG_205440;TGME49_205440;TGGT1_205440	CCT chaperonin gamma subunit	N/A	0	-0.0406113	30.2483	30.302	30.2972	30.1719			6.8102e-61	60	39.6	12	16	14	12	9.78982	9.0943	9.28764	9.24761	9.08393	60.697
TGVEG_205470;TGGT1_205470;TGME49_205470	putative translation elongation factor 2 family protein;translation elongation factor 2 family protein, putative	N/A	0	-0.114626	34.6319	34.6155	34.4918	34.5263			0	366	60.1	36	39	38	37	11.0962	10.4659	10.5358	10.519	10.4501	93.088
TGVEG_205558;TGME49_205558;TGGT1_205558	NAC domain-containing protein	N/A	0	-0.229383	31.0713	31.0362	30.8534	30.7954			5.1521e-79	45	52.4	5	7	7	7	9.99226	9.26354	9.50736	9.37678	9.37862	20.507
TGVEG_205570;TGME49_205570;TGGT1_205570	hypothetical protein;outer membrane, OMP85 family protein	N/A	0	NaN	NaN	NaN	NaN	25.075			0.0070532	1	1.4	1	1	0	1	7.96858	7.451	7.4222	NaN	7.5836	68.156
TGVEG_205580;TGME49_205580;TGGT1_205580	nuclear factor NF4	HMM: MASTKSGALPLFWSAAELAAN, NN: MASTKSGALPLFWSAAELAAN	0	NaN	26.9104	NaN	NaN	NaN			5.7797e-16	7	9.7	3	1	2	1	8.46774	8.10085	7.65096	7.80213	7.77292	51.22
TGVEG_205700;TGME49_205700;TGGT1_205700	cyclophilin precursor	N/A	1	-0.212008	32.6253	32.4198	32.2781	32.3431			3.8203e-33	87	24.7	9	8	9	8	10.4453	9.86635	9.8668	9.86532	9.76635	38.193
TGVEG_205710;TGME49_205710;TGGT1_205710	lysine-tRNA ligase	HMM: MRSPCSGGKSLFEALSLVFCWRPRVWPR, NN: MRSPCSGGKSLFEALSLVFCWRPRVWPR	0	0.047987	30.3351	30.428	30.3356	30.5235			3.6278e-79	76	40.1	15	16	18	13	9.83138	9.12707	9.25098	9.35071	9.15158	74.336
TGVEG_206320;TGME49_206320;TGGT1_206320	hypothetical protein;putative transmembrane protein	N/A	2	NaN	25.7023	NaN	NaN	NaN			4.9455e-10	4	14.6	2	1	2	2	8.4435	7.73715	7.77439	7.89902	7.92593	32.311
TGVEG_206480;TGME49_206480;TGGT1_206480	hypothetical protein	HMM: MAFSGLAAMASPPAATRAQ, NN: MAFSGLAAMASPPAATRAQLVSRRFLSGRLACPSAVSLTSGA	0	NaN	NaN	NaN	NaN	25.2794			0.0041162	5	5.8	1	1	1	1	8.39618	7.8216	7.90254	7.76796	7.64515	22.522
TGVEG_206590;TGME49_206590;TGGT1_206590	calcium-dependent protein kinase CDPK2A	N/A	0	-0.666142	NaN	26.654	25.9879	NaN			4.0729e-07	5	5.5	0	2	3	0	8.35765	NaN	7.97615	8.12447	NaN	86.364
TGVEG_206610;TGGT1_206610;TGME49_206610	pyruvate dehydrogenase complex subunit PDH-E2	HMM: MALPSPGILVHVSLFLAAVSSAFGL, NN: MALPSPGILVHVSLFLAAVSSAFGL	0	-0.213111	27.5828	28.0631	27.4711	27.7486			2.8942e-36	16	11.7	2	7	5	3	9.03282	8.07598	8.71691	8.39596	8.27747	96.848
TGVEG_207060;TGME49_207060;TGGT1_207060	ribonucleoside-diphosphate reductase small subunit	N/A	0	-0.092001	28.2818	28.6468	28.364	28.3806			4.9567e-21	24	20.5	5	5	6	3	9.2319	8.63513	8.69699	8.7238	8.39263	44.585
TGVEG_207170;TGME49_207170;TGGT1_207170	hypothetical protein;putative transmembrane protein	N/A	1	-0.29574	27.7299	NaN	27.4342	NaN			2.4593e-18	8	31.2	2	1	3	1	8.88243	8.31931	8.18988	8.43387	8.10667	15.231
TGVEG_207430;TGME49_207430;TGGT1_207430	ATP-dependent RNA helicase DDX1, putative;putative ATP-dependent RNA helicase DDX1	N/A	0	NaN	NaN	24.2825	NaN	NaN			0.0042725	1	2	0	1	0	0	7.40319	NaN	7.40319	NaN	NaN	82.791
TGVEG_207440;TGME49_207440;TGGT1_207440	ribosomal protein RPS4	N/A	1	-0.0252285	32.8488	33.0197	32.8569	32.9612			1.626e-78	153	52.9	17	18	18	17	10.596	9.86822	10.0764	10.0479	9.95285	35.507
TGVEG_207770;TGME49_207770;TGGT1_207770	PCI domain-containing protein	N/A	0	-0.164139	27.9638	28.5258	28.2322	27.9291			5.7483e-38	19	20.5	6	5	4	4	9.14817	8.60124	8.64713	8.45381	8.44607	55.462
TGVEG_207840;TGME49_207840;TGGT1_207840	ribosomal protein RPS17	N/A	0	0.000610352	32.0668	32.0543	32.1026	32.0198			3.349e-99	98	68.9	13	12	11	12	10.3389	9.70743	9.76107	9.7945	9.67453	15.228
TGVEG_208030;TGME49_208030;TGGT1_208030	microneme protein MIC4	HMM: MRASLPVHLVVCTQLSAVWFGVAKAH, NN: MRASLPVHLVVCTQLSAVWFGVAKAH	0	-0.343136	30.9171	30.5637	30.4399	30.3546			2.3037e-114	53	30.5	14	7	11	7	9.87767	9.402	9.27688	9.24025	9.14333	63.021
TGVEG_208440;TGME49_208440;TGGT1_208440	hypothetical protein	HMM: MNTFFLTPAAAAARRVAVSFFARSSASGF, NN: MNTFFLTPAAAAARRVAVSFFARSSASGF	0	NaN	NaN	NaN	NaN	27.0541			6.1213e-05	4	8.8	1	1	0	2	8.49126	7.82551	7.96321	NaN	8.17938	22.31
TGVEG_208500;TGME49_208500;TGGT1_208500	protein phosphatase 2C domain-containing protein	N/A	0	NaN	NaN	NaN	NaN	23.5334			0.0042117	4	1.4	1	1	1	1	7.55675	6.88928	6.73983	6.98347	7.11952	77.696
TGVEG_208590;TGME49_208590;TGGT1_208590	putative vacuolar ATP synthase subunit 54kD;vacuolar ATP synthase subunit 54kD, putative	N/A	0	-0.276718	NaN	25.5059	25.2292	NaN			2.604e-11	9	8.4	2	3	2	1	8.28056	7.67766	7.8214	7.66842	7.48139	53.311
TGVEG_208790;TGME49_208790;TGGT1_208790	MC family transporter, putative;putative MC family transporter	HMM: MASSAATSLAPSSSAA, NN: MASSAATSLAPSSSAA	0	-0.0263271	26.799	26.7094	26.7526	26.7031			3.8388e-24	18	22.9	4	4	4	3	8.72851	7.92504	8.24301	8.18438	8.09047	33.687
TGVEG_209030;TGME49_209030;TGGT1_209030	actin ACT1	N/A	0	-0.0949345	34.215	34.2197	34.1685	34.0764			0	273	72.3	26	24	24	21	11.0016	10.3625	10.4436	10.4842	10.28	41.907
TGVEG_209060;TGME49_209060;TGGT1_209060	thrombospondin type 1 domain-containing protein	HMM: MFEKRRRRGFLPPAALLGLLALLSAD, NN: MFEKRRRRGFLPPAALLGLLALLSAD;HMM: MLEKRRRRGFLPPAALLGLLALLSAD, NN: MLEKRRRRGFLPPAALLGLLALLSAD	1	NaN	NaN	NaN	25.3754	NaN			0.0045764	2	1.3	1	0	1	0	7.97056	7.51778	NaN	7.78178	NaN	93.635
TGVEG_209160;TGME49_209160;TGGT1_209160	myristoyl CoA:protein N-myristoyltransferase	N/A	0	-0.129974	28.7902	28.6082	28.5592	28.5792			2.572e-34	32	23.1	7	9	9	9	9.2901	8.67876	8.68588	8.73214	8.65146	52.376
TGVEG_209260;TGME49_209260;TGGT1_209260	cytochrome c oxidase subunit, putative;putative cytochrome c oxidase subunit	HMM: MAAARLSQVFAPGAAPRHFFSKTFSAVSGKNISSFSQLAARSSACTLASLSSPLCSSGL, NN: MAAARLSQVFAPGAAPR;HMM: MAAARLSQVFAPGAAPRHLFSKSFSAVSGKNISSFSQLAARSSACTLASLSSPLCSSGL, NN: MAAARLSQVFAPGAAPR	0	NaN	NaN	26.753	NaN	NaN			1.5664e-09	5	15.5	0	2	3	1	8.72615	NaN	8.1469	8.40329	8.14283	34.706
TGVEG_209290;TGME49_209290;TGGT1_209290	ribosomal protein RPS28	HMM: MPFGALFPVSSRFSHTFAPRICVFSFLSHSPSSRLVWGC, NN: MPFGALFPVSSRFSHTFAP	0	-0.183612	30.8861	30.6924	30.4902	30.721			3.6073e-19	26	30.5	3	4	3	3	9.92672	9.35295	9.32033	9.27261	9.34813	13.214
TGVEG_209600;TGME49_209600;TGGT1_209600	hypothetical protein	N/A	0	-0.127302	30.9811	30.6222	30.7392	30.6096			8.421e-67	84	37.7	13	12	13	12	9.93387	9.30574	9.3544	9.42201	9.22058	50.2
TGVEG_209690;TGME49_209690;TGGT1_209690	small nuclear ribonucleoprotein	N/A	0	NaN	NaN	NaN	24.5362	NaN			0.00010664	1	4.7	1	0	1	0	7.73098	7.30114	NaN	7.52916	NaN	24.897
TGVEG_209720;TGME49_209720;TGGT1_209720	hypothetical protein;putative transmembrane protein	HMM: MTNCLSKLPYVSAACGTASLLVYFFPSTLLSC, NN: MTNCLSKLPYVSAACGTASLLVYFFPSTLLSC	4	0.0659771	27.1978	27.3516	27.2192	27.4622			4.085e-53	9	19.3	2	2	3	3	8.8962	8.15506	8.30752	8.36853	8.31777	23.416
TGVEG_209800;TGME49_209800;TGGT1_209800	formate/nitrite transporter protein	N/A	6	NaN	NaN	NaN	23.93	NaN			1.8365e-06	2	4.9	1	0	1	0	7.63475	7.32037	NaN	7.34667	NaN	44.29
TGVEG_209910;TGME49_209910;TGGT1_209910	histone H2Bv	N/A	0	-0.108831	30.9866	31.0402	30.7958	31.0134			2.4052e-38	46	56.9	7	6	7	6	9.99635	9.33003	9.46265	9.40932	9.36365	13.732
TGVEG_210370;TGME49_210370;TGGT1_210370	hypothetical protein;putative RNA helicase-1	HMM: MATVPMVSLSAARFTLSFLFFQLCLSR, NN: MATVPMVSLSAARFTLSFLFFQLCLSR	0	0.0752544	26.1597	26.4338	26.1734	26.5706			4.1534e-14	14	11.7	3	5	3	3	8.59433	8.00264	8.01632	7.92862	8.01561	52.432
TGVEG_210408;TGME49_210408;TGGT1_210408	HMG (high mobility group) box domain-containing protein	N/A	0	0.190152	30.2208	30.6454	30.6502	30.5963			2.5465e-11	34	38.3	3	4	3	3	9.87474	9.07686	9.32214	9.37676	9.26012	10.682
TGVEG_210690;TGME49_210690;TGGT1_210690	ribosomal protein RPS6	N/A	0	-0.125582	32.1251	32.2178	32.0585	32.0332			3.7407e-68	112	50.8	13	10	11	12	10.355	9.66682	9.76711	9.83055	9.73104	28.956
TGVEG_210790;TGME49_210790;TGGT1_210790	dihydroorotate dehydrogenase reveal, putative;putative dihydroorotate dehydrogenase reveal	HMM: MAALTVHFQGRFALLRLPISSGK, NN: MAALTVHFQGRFALLRLPISSGK;HMM: MAPLTMHFQGRFALLRLPISSGK, NN: MAPLTMHFQGRFALLRLPISSGK	1	NaN	23.9726	NaN	NaN	NaN			0.0001744	0	3.9	1	0	1	0	7.72509	7.21648	NaN	7.56393	NaN	64.867
TGVEG_210840;TGME49_210840;TGGT1_210840	arginyl-tRNA synthetase family protein	N/A	0	-0.326683	28.5202	28.4039	28.0634	28.2073			1.9413e-33	25	20.5	5	8	8	7	9.19775	8.48075	8.71819	8.62977	8.51215	67.009
TGVEG_211020;TGME49_211020;TGGT1_211020	RNA recognition motif-containing protein	N/A	0	NaN	NaN	NaN	25.206	NaN			7.4206e-06	2	7.8	1	0	1	0	7.9964	7.65681	NaN	7.73079	NaN	28.736
TGVEG_211030;TGME49_211030;TGGT1_211030	hypothetical protein	N/A	0	0.0066576	30.2876	30.371	30.4457	30.2262			4.1661e-50	44	57.6	8	5	8	5	9.8159	9.13418	9.14579	9.40033	9.10391	22.215
TGVEG_211040;TGME49_211040;TGGT1_211040	Sec61beta family protein	N/A	1	-0.114342	29.7221	29.2465	29.5486	29.1914			4.4955e-56	24	56.6	5	4	4	4	9.53534	8.96982	8.8698	9.05354	8.79619	10.103
TGVEG_211250;TGME49_211250;TGGT1_211250	hypothetical protein	N/A	0	NaN	NaN	NaN	26.6738	NaN			5.5813e-06	3	8	0	1	2	1	8.53219	NaN	7.98403	8.17266	7.97934	28.598
TGVEG_211290;TGME49_211290	rhoptry protein ROP15	HMM: MLKTTPAFFLFLTWMFPRCDGF, NN: MLKTTPAFFLFLTWMFPRCDGF	0	NaN	NaN	NaN	27.944	NaN			5.7834e-45	7	30	1	1	1	1	9.02202	8.42625	8.3947	8.55502	8.25049	36.586
TGVEG_211460;TGME49_211460;TGGT1_211460	hypothetical protein	N/A	0	NaN	NaN	NaN	23.3901	NaN			2.2235e-05	2	2.1	0	1	1	0	8.42719	NaN	8.40164	7.18412	NaN	105.75
TGVEG_211680;TGME49_211680;TGGT1_211680	protein disulfide isomerase	HMM: MRAGFSFALLAVGLLATAVVYSA, NN: MRAGFSFALLAVGLLATAVVYSAAE	0	0.0388527	34.0821	34.0018	34.155	34.0065			1.2034e-266	280	66.9	32	32	34	27	10.9321	10.3078	10.3295	10.4008	10.2718	52.801
TGVEG_211710;TGME49_211710;TGGT1_211710	TB2/DP1, HVA22 family protein	HMM: MISLLGNFLGSLLVLGVSFVYPA, NN: MISLLGNFLGSLLVLGVSFVYPA	3	NaN	NaN	NaN	27.3001	NaN			1.244e-08	6	26.2	1	1	2	2	8.46975	7.38536	7.33482	8.36118	7.28639	19.036
TGVEG_212290;TGME49_212290;TGGT1_212290	ribosomal protein RPS19	N/A	0	-0.289501	31.5441	31.0305	31.1401	30.8554		+	4.8981e-46	59	25.2	7	8	6	7	10.0568	9.3973	9.52649	9.52542	9.33949	34.968
TGVEG_212300;TGME49_212300;TGGT1_212300	hypothetical protein;putative transmembrane protein	HMM: MSAQGQQGVRSTVAAGKNRFWQPAPITVLLVLSSSFLFAFAA, NN: MSAQGQQGVRSTVAAGKNRFWQPAPITVLLVLSSSFLFAFAA	1	0.339534	28.2632	28.4603	28.7338	28.6688			7.0305e-73	34	30.9	7	12	6	12	9.26385	8.35468	8.83392	8.51865	8.7762	75.676
TGVEG_213280;TGME49_213280;TGGT1_213280	SAG-related sequence SRS25	HMM: MRTSRLLCAFGAVLLCWVPSWTAHAE, NN: MRTSRLLCAFGAVLLCWVPSWTAH	0	-0.449711	28.7263	NaN	28.4996	28.0536			6.7163e-26	9	25.1	3	1	3	2	9.16331	8.6687	8.25806	8.7349	8.42467	20.782
TGVEG_213350;TGME49_213350;TGGT1_213350	ribosomal protein RPS15	N/A	0	-0.0622702	31.7041	31.7244	31.7584	31.5456			3.8078e-50	53	64	7	5	7	5	10.2218	9.66251	9.59066	9.6822	9.52613	17.157
TGVEG_213410;TGME49_213410;TGGT1_213410	putative small nuclear ribonucleoprotein f (snrnp-f);small nuclear ribonucleoprotein f (snrnp-f), putative	N/A	0	0.439355	27.2807	27.366	27.6089	27.9166			2.0133e-27	14	54	3	2	3	3	8.96468	8.36758	7.96417	8.49588	8.45249	10.069
TGVEG_213670;TGME49_213670;TGGT1_213670	hypothetical protein;inner membrane protein	N/A	1	NaN	NaN	NaN	NaN	23.6319			0.004059	0	1.5	0	0	1	1	7.55229	NaN	NaN	7.33385	7.14916	85.24
TGVEG_213830;TGME49_213830;TGGT1_213830	putative Ufm1-conjugating enzyme 1;Ufm1-conjugating enzyme 1, putative	N/A	0	NaN	NaN	NaN	25.2026	NaN			0.0054691	0	7	1	0	1	0	7.91938	7.46808	NaN	7.72977	NaN	17.889
TGVEG_213870;TGME49_213870;TGGT1_213870	UBA/TS-N domain-containing protein	N/A	0	NaN	NaN	24.0359	NaN	NaN			1.3267e-07	3	2.2	1	1	0	1	7.74338	7.23259	7.32897	NaN	7.22971	117.11
TGVEG_214090;TGME49_214090;TGGT1_214090	signal peptidase	N/A	0	NaN	NaN	NaN	23.6987	NaN			3.7322e-06	2	0.9	0	1	1	0	7.70016	NaN	7.49432	7.27704	NaN	203.42
TGVEG_214210;TGME49_214210;TGGT1_214210	rRNA pseudouridine synthase	N/A	0	0.306437	27.2794	27.7461	28.1177	27.5207			4.158e-29	20	15.4	4	5	4	3	9.03635	8.20917	8.51811	8.6062	8.28314	56.744
TGVEG_214220;TGME49_214220;TGGT1_214220	hypothetical protein	HMM: MASLLQSLHRLTFWLVGGTDTT, NN: MASLLQSLHRLTFWLVGGTDTT;N/A	0	NaN	NaN	NaN	26.4962	26.7682			2.3791e-12	10	27.7	1	1	2	2	8.6678	7.98702	8.04844	8.13338	8.08124	12.238
TGVEG_214250;TGME49_214250;TGGT1_214250	hypothetical protein;putative transmembrane protein	N/A	1	NaN	NaN	NaN	NaN	25.3919			0.00067349	3	12.5	0	1	1	1	8.15158	NaN	7.65567	7.68812	7.67899	9.4449
TGVEG_214270;TGME49_214270;TGGT1_214270	putative translation initiation factor IF-2;translation initiation factor IF-2, putative	N/A	0	-0.0672598	27.2586	26.9291	27.0541	26.9991			1.3997e-21	13	6.9	5	2	4	4	8.81628	8.26045	8.07007	8.32445	8.1593	125.65
TGVEG_214290;TGME49_214290;TGGT1_214290	DJ-1 family protein	HMM: MSPLGFGAFLSPLLLFCVSPHLRTGV, NN: MSPLGFGAFLSPLLLFCVSPHLRTG	0	-0.118196	29.4548	29.3436	29.3073	29.2547			1.3887e-61	27	48.4	3	6	7	7	9.51428	8.50586	9.03286	8.97558	8.96549	27.904
TGVEG_214320;TGME49_214320;TGGT1_214320	facilitative glucose transporter GT1	N/A	12	-0.222887	28.6818	28.3842	28.2654	28.3549			5.9998e-13	15	6.5	4	4	2	3	9.21376	8.74589	8.74686	8.29833	8.50755	61.687
TGVEG_214350;TGME49_214350;TGGT1_214350	GTP-binding protein, putative;putative GTP-binding protein	N/A	0	-0.03827	29.2915	29.505	29.4591	29.2608			1.9248e-92	42	48.7	8	11	9	8	9.51323	8.95969	8.95143	8.93226	8.77742	44.547
TGVEG_214440;TGME49_214440;TGGT1_214440	4'-phosphopantetheinyl transferase superfamily protein	N/A	0	NaN	NaN	NaN	NaN	26.8191			2.8081e-10	3	12.6	2	2	2	3	8.69799	8.05281	8.14417	8.07243	8.10863	48.49
TGVEG_214490;TGME49_214490;TGGT1_214490	peptidase M16 inactive domain-containing protein	N/A	0	-0.132252	25.8908	25.8741	25.5884	25.9119			1.3739e-16	13	5.5	5	3	2	4	8.43619	7.73135	7.84078	7.71927	7.98878	148.86
TGVEG_214750;TGME49_214750;TGGT1_214750	hypothetical protein	HMM: MRVPIAPSSLSKATRRKLAANAAAGPAVSAVPAPAFSLPPSASGR, NN: MRVPIAPSSLSKATRRKLAANAAAGPAVSAVPAPAFSL	0	NaN	NaN	NaN	24.7821	NaN			0.0054948	1	1.2	0	1	1	0	7.89791	NaN	7.5905	7.60318	NaN	119.97
TGVEG_214790;TGME49_214790;TGGT1_214790	glycoprotein	N/A	0	0.0251017	29.1601	29.5103	29.239	29.4816			3.0306e-37	23	27.6	4	5	4	6	9.5056	8.91441	8.94353	8.88622	8.86603	31.444
TGVEG_214930;TGME49_214930;TGGT1_214930	hypothetical protein	N/A	0	0.335682	NaN	26.7627	27.1794	27.0173			1.7217e-27	13	44.9	0	4	3	5	8.69109	NaN	8.23523	8.1869	8.21838	15.147
TGVEG_214940;TGME49_214940;TGGT1_214940	MIC2-associated protein M2AP	HMM: MKLAAVSSAAFAAAFFPAVVNAR, NN: MKLAAVSSAAFAAAFFPAVVNAR;HMM: MKLAAVSSAAFAAAFFPAVVSAR, NN: MKLAAVSSAAFAAAFFPAVVSAR	0	-0.793585	30.7392	30.4845	30.0504	29.5862			1.1377e-87	35	31.5	6	8	6	4	9.79491	9.25093	9.34902	9.18384	8.84085	34.556
TGVEG_214970;TGME49_214970;TGGT1_214970	DNA replication licensing factor, putative;putative DNA replication licensing factor	N/A	0	0.489676	25.9566	26.6399	26.6722	26.9036			1.6464e-22	17	8.3	3	6	5	4	8.68934	7.64077	8.20493	8.21966	8.07617	117.27
TGVEG_215060;TGME49_215060;TGGT1_215060	putative small GTP-binding protein sar1;small GTP-binding protein sar1, putative	N/A	0	0.20783	28.3608	28.353	28.5459	28.5835			4.0864e-14	15	21.4	2	2	2	2	9.2465	8.56465	8.67762	8.76626	8.52782	22.138
TGVEG_215220;TGGT1_215220;TGME49_215220	hypothetical protein	N/A	0	-0.0138159	31.8226	31.7252	31.7767	31.7435		+	2.2468e-126	97	60	20	16	19	18	10.2387	9.62741	9.63308	9.69219	9.58743	63.201
TGVEG_215260;TGME49_215260;TGGT1_215260	carbamoylphosphate synthetase	N/A	0	-0.0828171	27.2446	27.483	27.2789	27.2831			4.3966e-32	15	7.9	3	4	8	3	8.90821	8.13874	8.39025	8.44096	8.17667	187.1
TGVEG_215280;TGME49_215280;TGGT1_215280	succinate dehydrogenase [ubiquinone] iron-sulfur protein	HMM: MLSSALRSVRPAASAASRRFASVAHAQTAASEAEAA, NN: MLSSALRSVRPAASAA	0	NaN	NaN	NaN	NaN	25.8695			1.4135e-10	7	16.4	1	3	1	2	8.26086	7.21651	7.86477	7.41709	7.82278	38.61
TGVEG_215420;TGME49_215420;TGGT1_215420	SNARE protein	N/A	0	NaN	NaN	NaN	NaN	25.4217			3.2428e-13	6	21.7	2	1	1	2	8.25895	7.94405	7.46926	7.18775	7.68797	26.142
TGVEG_215430;TGME49_215430;TGGT1_215430	hypothetical protein	HMM: MQLTWKQILLIAGGTAAAGA, NN: MQLTWKQILLIAGGTAAA	0	-0.261978	29.4365	29.3853	29.0262	29.2716			6.5996e-71	32	48.4	6	6	5	8	9.48019	8.86646	8.89776	8.80415	8.93385	27.554
TGVEG_215460;TGME49_215460;TGGT1_215460	ribosomal protein RPS24	N/A	0	-0.26158	31.8168	31.7772	31.5849	31.4859			3.8795e-38	70	24.7	7	7	7	8	10.2223	9.61617	9.6638	9.66306	9.52345	30.375
TGVEG_215470;TGME49_215470;TGGT1_215470	ribosomal protein RPL10A	N/A	0	-0.133521	31.9371	32.0408	31.8383	31.8725			2.5992e-58	100	57.1	11	11	11	11	10.3231	9.68327	9.77944	9.78655	9.61137	24.603
TGVEG_215590;TGME49_215590;TGGT1_215590	flavoprotein subunit of succinate dehydrogenase	HMM: MHASASLTQALRPYARRPLSSALSRSSLSPALAAGVARGLNAA, NN: MHASASLTQALRPYARRPLSSALSRSSLSPALAA	0	NaN	NaN	NaN	28.4439	28.5081			5.5873e-18	9	13.9	3	1	4	2	9.19315	8.62529	8.2193	8.8686	8.36832	72.733
TGVEG_215610;TGGT1_215610	hypothetical protein	N/A	0	NaN	NaN	NaN	25.2764	NaN			0.00066851	1	13.5	0	0	1	0	7.75199	NaN	NaN	7.75199	NaN	13.014
TGVEG_215775;TGGT1_215775	rhoptry protein ROP8	HMM: MFSVLRNRNMRHGPSIGSSSCLIWLAAAFFVSALGH, NN: MFSVLRNRNMRHGPSIGSSSCLIWLAAAFFVSALGH	1	-0.104434	25.542	25.184	NaN	25.2585			7.2296e-22	9	9.9	2	2	1	2	8.21032	7.69392	7.67378	7.35604	7.63342	65.402
TGVEG_215910;TGME49_215910;TGGT1_215910	hypothetical protein	HMM: MAARLRSLSLGRFCLLLLLATWSAWSAAGSSSA, NN: MAARLRSLSLGRFCLLLLLATWSAWSAAG	0	NaN	NaN	22.8336	NaN	NaN			0.00097723	2	0.6	0	1	0	1	6.96705	NaN	6.96705	NaN	NaN	328.04
TGVEG_215980;TGME49_215980;TGGT1_215980	hypothetical protein;putative transmembrane protein	N/A	1	-0.162354	31.9524	31.9625	31.8918	31.6984		+	6.8911e-47	76	34.8	8	8	7	7	10.2834	9.58326	9.77294	9.75666	9.57214	24.466
TGVEG_216000;TGME49_216000;TGGT1_216000	alveolin domain containing intermediate filament IMC3	N/A	0	-0.141533	30.2999	30.6283	30.3678	30.2773			5.5061e-115	48	28.4	11	10	10	9	9.82642	9.16823	9.31568	9.24494	9.14802	57.999
TGVEG_216130;TGME49_216130;TGGT1_216130	putative ubiquitin conjugating enzyme E2;ubiquitin conjugating enzyme E2, putative	N/A	0	NaN	NaN	NaN	26.1839	NaN			8.0915e-06	2	8.8	1	0	1	0	8.26984	7.90403	NaN	8.02518	NaN	24.616
TGVEG_216180;TGME49_216180;TGGT1_216180	hypothetical protein;putative transmembrane protein	HMM: MITVILCSVLFYSLGLVAPTSAA, NN: MITVILCSVLFYSLGLVAPTSAA	3	-0.0480251	27.4233	27.3953	27.4721	27.2504		+	2.2676e-14	11	21.8	3	2	2	2	8.9117	8.36258	8.30449	8.34366	8.21312	16.441
TGVEG_216260;TGME49_216260;TGGT1_216260	eukaryotic initiation factor-2B, gamma subunit, putative;putative eukaryotic initiation factor-2B, gamma subunit	N/A	0	-0.145823	27.3749	27.9988	27.5911	27.4911			1.0097e-18	21	16	2	8	5	6	9.00234	7.97657	8.62726	8.41167	8.35929	58.016
TGVEG_216410;TGME49_216410;TGGT1_216410	hypothetical protein;putative apicomplexan specific protein	N/A	0	NaN	NaN	23.954	NaN	NaN			2.8882e-12	1	7.4	0	1	0	0	7.30432	NaN	7.30432	NaN	NaN	21.226
TGVEG_216450;TGME49_216450;TGGT1_216450	peptidase, T1 family protein	N/A	0	-0.114069	29.0328	29.0717	28.995	28.8813			6.3729e-18	16	25	5	4	3	3	9.40524	8.78601	8.77322	8.94923	8.6518	27.939
TGVEG_216590;TGME49_216590;TGGT1_216590	HEAT repeat-containing protein	N/A	0	-0.0193348	27.53	27.2878	27.3396	27.4395			4.4258e-16	11	5.7	2	4	3	2	8.92477	8.25387	8.37903	8.41066	8.2168	111.19
TGVEG_216620;TGME49_216620;TGGT1_216620	EF hand domain-containing protein	N/A	7	NaN	25.8249	NaN	NaN	NaN			0.00070986	2	0.5	1	0	0	1	7.77406	7.77406	NaN	NaN	NaN	411.98
TGVEG_216680;TGME49_216680;TGGT1_216680	ankyrin repeat-containing protein	N/A	1	NaN	NaN	NaN	23.8966	NaN			0.0049478	1	3.5	1	0	1	0	7.73636	7.51571	NaN	7.33662	NaN	44.597
TGVEG_216720;TGME49_216720;TGGT1_216720	hypothetical protein	HMM: MGGNGRTHVSSVSLFLVLVATVALSE, NN: MGGNGRTHVSSVSLFLVLVATVALSE	0	NaN	NaN	NaN	25.4822	NaN			1.6174e-06	2	9.8	1	0	1	0	7.94648	7.36648	NaN	7.81393	NaN	20.037
TGVEG_216730;TGME49_216730;TGGT1_216730	MCM2/3/5 family protein	N/A	0	NaN	NaN	NaN	25.2339	NaN			4.5193e-08	3	3.3	0	0	3	1	7.80631	NaN	NaN	7.73918	6.96233	113.22
TGVEG_216790;TGME49_216790;TGGT1_216790	ATP-binding cassette sub-family E member 1, putative;putative ATP-binding cassette sub-family E member 1	N/A	0	-0.227194	27.151	26.8297	26.8853	26.641			3.4804e-35	16	10.3	4	5	3	4	8.77014	7.98808	8.32156	8.16385	8.1343	69.219
TGVEG_216860;TGME49_216860;TGGT1_216860	DEAD (Asp-Glu-Ala-Asp) box polypeptide DDX39	N/A	0	-0.146594	31.7358	31.9643	31.7038	31.7031			2.4173e-152	119	65.4	20	17	15	15	10.2554	9.63658	9.74173	9.66045	9.55417	49.113
TGVEG_216880;TGME49_216880;TGGT1_216880	guanine nucleotide-binding protein	N/A	0	-0.145411	32.6056	32.1502	32.4946	31.9705			2.748e-240	121	62.6	11	14	14	13	10.4229	9.71046	9.8528	9.95551	9.71545	35.147
TGVEG_217460;TGME49_217460;TGGT1_217460	glutaminyl-tRNA synthetase (GlnRS)	HMM: MALSPGAVLRITRLASLPPLSTVTDVVLAY, NN: MALSPGAVLRITRLASLPPLSTVTDVVLAY	0	-0.172518	30.3089	30.148	30.1065	30.0053			1.8659e-135	72	37.7	17	16	16	17	9.74796	9.11618	9.1602	9.22701	9.06356	95.526
TGVEG_217570;TGME49_217570;TGGT1_217570	ribosomal protein RPS27	N/A	0	NaN	NaN	NaN	NaN	27.757			7.4774e-08	11	13.9	1	1	1	1	9.04175	8.18862	8.39801	8.65364	8.39094	16.954
TGVEG_217820;TGME49_217820;TGGT1_217820	PCI domain-containing protein	N/A	0	0.0980062	29.3058	29.4854	29.5041	29.4831			4.1762e-72	44	31.5	7	8	10	7	9.54902	8.78155	8.99694	9.12369	8.78741	51.722
TGVEG_217890;TGME49_217890;TGGT1_217890	alkyl hydroperoxide reductase/ Thiol specific antioxidant/ Mal allergen, putative;putative alkyl hydroperoxide reductase/ Thiol specific antioxidant/ Mal allergen	N/A	0	-0.140315	31.6214	31.5431	31.481	31.4029			3.2873e-80	97	71.4	13	11	12	11	10.1731	9.58098	9.60342	9.58882	9.50451	21.722
TGVEG_218240;TGME49_218240;TGGT1_218240	hypothetical protein;putative transmembrane protein	HMM: MRPAFSGTSQGAGTRALWRWGRRSSFVSLCAASFLGVILLGSAQESLSA, NN: MRPAFSGTSQGAGTRALWRWGRRSSFVSLCAASFLGVILLGSAQESLSA	1	0.0834036	26.7856	26.6231	26.613	26.9625			1.4876e-20	13	5.1	3	5	2	3	8.72786	7.90557	8.36243	7.99246	8.09792	132.28
TGVEG_218250;TGME49_218250;TGGT1_218250	TAP42 family protein	N/A	0	NaN	NaN	NaN	24.5863	NaN			1.2326e-08	4	5.9	0	1	2	2	7.91086	NaN	7.25137	7.54423	7.45624	56.861
TGVEG_218280;TGME49_218280;TGGT1_218280	eukaryotic porin, putative;putative eukaryotic porin	N/A	0	0.183298	NaN	27.177	27.6017	27.1189			7.3711e-22	13	11.2	1	4	3	3	8.81691	7.50748	8.43845	8.31958	8.14817	50.57
TGVEG_218410;TGME49_218410;TGGT1_218410	ribosomal protein RPP0	N/A	0	-0.199547	32.656	32.7941	32.4794	32.5716		+	4.6515e-97	135	57	13	14	13	13	10.5013	9.84805	10.0029	9.90319	9.81984	34.157
TGVEG_218520;TGME49_218520;TGGT1_218520	microneme protein MIC6	HMM: MRLFRCCAAAVVAAESLLWLKNGS, NN: MRLFRCCAAAVVAAESLLWLKNGS	1	-0.397086	29.2351	29.338	28.7833	28.9956			7.8574e-50	25	24.6	4	7	4	4	9.43359	8.76171	9.03189	8.75448	8.6918	36.613
TGVEG_218530;TGME49_218530;TGGT1_218530	proteasome-interacting thioredoxin domain-containing protein	N/A	0	NaN	NaN	NaN	NaN	27.6668			3.8708e-17	7	9	1	2	1	3	8.64857	7.82823	7.88558	7.84475	8.36382	38.088
TGVEG_218540;TGME49_218540;TGGT1_218540	peptidase S15, putative;putative peptidase S15	HMM: MGFSSSNWSWAGLGCGLLALAILLPPDPGL, NN: MGFSSSNWSWAGLGCGLLALAI	1	0.13798	26.7889	27.5085	27.3389	27.2344			5.8156e-17	14	12.1	4	2	3	3	8.86776	8.32899	8.22214	8.32465	8.16507	45.147
TGVEG_218820;TGME49_218820;TGGT1_218820	alba 2	N/A	0	-0.238852	30.4596	30.126	30.1885	29.9194			6.2357e-22	26	49.3	7	7	4	5	9.76418	9.2411	9.28244	9.12914	8.90601	15.391
TGVEG_218900;TGME49_218900;TGGT1_218900	hypothetical protein	N/A	0	-0.377142	27.156	NaN	NaN	26.7788			0.00044047	6	1.2	1	1	1	1	8.56015	8.16673	7.61486	7.67536	8.10673	101.32
TGVEG_218920;TGME49_218920;TGGT1_218920	proteasome subunit beta type, putative;putative proteasome subunit beta type	N/A	0	-0.185213	27.5251	27.3853	27.2473	27.2926			1.4216e-08	8	11.7	2	3	2	2	8.91336	8.22089	8.46793	8.31771	8.17981	33.757
TGVEG_218940;TGGT1_218940;TGME49_218940	hypothetical protein	N/A	0	-0.134862	27.1652	27.002	26.9487	NaN			1.0767e-17	10	16.3	3	2	3	1	8.76737	8.1799	8.17693	8.29504	7.93661	35.253
TGVEG_219140;TGME49_219140;TGGT1_219140	EF-1 guanine nucleotide exchange domain-containing protein	N/A	0	NaN	NaN	NaN	26.489	NaN			9.2411e-21	7	17.1	2	1	3	1	8.80503	8.55184	7.93793	8.11704	7.80878	20.734
TGVEG_219270;TGME49_219270;TGGT1_219270	multi-pass transmembrane protein	N/A	6	-0.374908	28.6949	NaN	28.32	NaN			7.3036e-11	12	8.7	2	1	2	2	9.19368	8.60464	8.60366	8.70798	8.39389	43.033
TGVEG_219280;TGME49_219280;TGGT1_219280	actin like protein ALP1	N/A	0	0.189692	NaN	26.4159	26.6791	26.5321			2.4747e-15	13	10.4	1	3	2	3	8.62278	7.77351	8.12401	8.04918	8.06126	46.086
TGVEG_219310;TGME49_219310;TGGT1_219310	DnaK family protein	N/A	0	-0.164073	31.0818	31.0698	30.8585	30.9651			7.4081e-120	80	28.7	18	18	15	15	10.0005	9.39754	9.43207	9.42862	9.32773	90.156
TGVEG_219320;TGME49_219320;TGGT1_219320	acid phosphatase GAP50	HMM: MAGAPVAAAPAASSRVAGDSGRSRALSSFFSVFSLCVFSVFLATPTAVVAQ, NN: MAGAPVAAAPAASSRVAGDSGRSRALSSFFSVFSLCVFSVFLATPTAVVAQ	2	-0.132122	32.3433	32.3043	32.2039	32.1795			4.543e-131	106	45.5	12	14	16	13	10.3948	9.71177	9.86705	9.83313	9.73998	46.606
TGVEG_219540;TGME49_219540;TGGT1_219540	cytosolic tRNA-Ala synthetase	HMM: MLDVPILCALLVLLLSSLPAGAGAL, NN: MLDVPILCALLVLLLSSLPAGAGAL	0	-0.00922394	32.0714	32.2571	32.1084	32.2016			3.164e-203	173	32	28	28	31	25	10.3561	9.65679	9.81469	9.81363	9.71022	139.29
TGVEG_219550;TGME49_219550;TGGT1_219550	dihydrolipoyllysine-residue succinyltransferase component of oxoglutarate dehydrogenase	HMM: MPVLAAAAAASRRGLSSLLLPVECR, NN: MPVLAAAAAASRRGLSSLLLPVECR	0	NaN	NaN	25.4653	NaN	NaN			5.9555e-15	1	6.2	1	1	1	0	8.23411	7.99953	7.75926	7.14922	NaN	50.125
TGVEG_219590;TGME49_219590;TGGT1_219590	RuvB family 1 protein	N/A	0	-0.378479	26.4076	NaN	26.0291	NaN			4.7678e-21	9	16.5	4	3	6	0	8.47382	7.88292	8.03579	8.05219	NaN	52.949
TGVEG_219630;TGGT1_219630;TGME49_219630	flavodoxin domain-containing protein	HMM: MSGFFSETPGRLLLLSGVALGTAAAL, NN: MSGFFSETPGRLLLLSGVALGTAAA;HMM: MSGFFTETPGRLLLLSGVALGTAAAL, NN: MSGFFTETPGRLLLLSGVALGTAAA	1	NaN	NaN	NaN	NaN	23.7959			1.5172e-08	4	3.4	1	1	1	1	7.73411	6.86638	7.15679	7.22318	7.19855	104.13
TGVEG_219700;TGME49_219700;TGGT1_219700	DNA replication licensing factor MCM4, putative;putative DNA replication licensing factor MCM4	N/A	0	NaN	NaN	26.1757	NaN	NaN			1.1633e-13	4	3.7	1	3	0	0	8.18749	7.77809	7.97311	NaN	NaN	111.92
TGVEG_219720;TGME49_219720;TGGT1_219720	putative Ras-related protein Rab-5C;Ras-related protein Rab-5C, putative	N/A	0	NaN	NaN	NaN	NaN	23.9496			5.46e-10	2	10.3	0	1	0	1	7.77488	NaN	7.62302	NaN	7.24482	25.705
TGVEG_219750;TGME49_219750;TGGT1_219750	cytochrome c, putative;putative cytochrome c	N/A	0	-0.198071	29.8171	29.8389	29.6748	29.585			7.7027e-19	34	40.9	4	4	4	5	9.64046	8.96555	9.05431	9.11654	9.00217	12.453
TGVEG_219800;TGME49_219800;TGGT1_219800	putative vacuolar ATP synthase subunit b;vacuolar ATP synthase subunit b, putative	N/A	0	-0.118189	28.8648	28.8762	28.6371	28.8675			4.2124e-58	34	31.7	8	6	9	7	9.34672	8.75064	8.68224	8.8641	8.64969	56.614
TGVEG_219810;TGGT1_219810;TGME49_219810	hypothetical protein;putative transmembrane protein	N/A	1	NaN	NaN	24.2886	NaN	NaN			1.0333e-09	3	3.9	1	1	1	2	8.08443	7.32903	7.40504	7.564	7.58057	106.43
TGVEG_219850;TGME49_219850;TGGT1_219850	prolyl-tRNA synthetase (ProRS)	HMM: MRPGVFSRGFCRPGTLFSPFSLLFSSLWWTLWTRPSTTLAF, NN: MRPGVFSRGFCRPGTLFSPFSLLFSSLWWTLWTR	0	-0.0223417	31.4932	31.601	31.5556	31.4939			1.438e-167	123	47.6	21	25	23	21	10.1664	9.48629	9.64911	9.5899	9.51291	93.444
TGVEG_219860;TGME49_219860;TGGT1_219860	putative replication licensing factor;replication licensing factor, putative	N/A	0	0.201397	25.7464	NaN	25.9478	NaN			2.4766e-17	9	7.4	2	3	3	2	8.44085	7.67323	8.06446	8.01161	7.00561	108.21
TGVEG_220100;TGME49_220100;TGGT1_220100	phosphoribosylpyrophosphate synthetase	N/A	0	-0.0555201	27.9746	27.8773	27.7932	27.9477			3.3848e-31	19	21.2	7	4	4	4	9.06123	8.55663	8.4321	8.447	8.38167	60.997
TGVEG_220270;TGME49_220270;TGGT1_220270	alveolin domain containing intermediate filament IMC6	N/A	0	-0.22501	27.9084	28.1286	27.9484	27.6386		+	9.6072e-17	17	18	5	4	2	3	9.06711	8.55084	8.61845	8.32129	8.27112	48.634
TGVEG_220400;TGGT1_220400;TGME49_220400	actin depolymerizing factor ADF	N/A	0	-0.238121	32.3788	31.9829	31.9148	31.9707			1.4164e-49	82	71.2	7	7	6	6	10.3628	9.76879	9.75372	9.79837	9.71825	12.948
TGVEG_220500;TGME49_220500;TGGT1_220500	UBX domain-containing protein	N/A	0	-0.685379	26.9004	NaN	26.215	NaN			4.0134e-14	9	11.9	3	2	3	1	8.60942	8.09906	8.05373	8.03246	7.78019	43.132
TGVEG_220600A;TGME49_220600;TGGT1_220600	hypothetical protein;putative transporter	N/A	10;5	NaN	NaN	NaN	NaN	24.3235			1.1086e-05	3	1.2	0	1	1	1	7.697	NaN	7.4314	NaN	7.35738	61.471
TGVEG_220860;TGME49_220860;TGGT1_220860	DEAD/DEAH box helicase	HMM: MAQKEGVAVAMAAGLAAAAAAM, NN: MAQKEGVAVAMAAGLAAAAAA	0	NaN	NaN	NaN	NaN	25.0851			7.4492e-12	5	10.3	1	1	2	1	8.19568	7.39496	7.22884	7.88392	7.58665	65.158
TGVEG_220890;TGME49_220890;TGGT1_220890	hypothetical protein;putative transmembrane protein	N/A	1	NaN	NaN	NaN	NaN	23.9106			0.0015272	4	2.2	1	1	1	1	8.00199	7.26741	7.43727	7.57376	7.23307	51.171
TGVEG_220900;TGME49_220900;TGGT1_220900	hypothetical protein	N/A	0	NaN	NaN	24.7929	NaN	NaN			1.094e-07	3	3.8	1	1	1	0	8.17038	7.8786	7.55686	7.56083	NaN	77.967
TGVEG_221180;TGGT1_221180;TGME49_221180	hypothetical protein;putative transmembrane protein	HMM: MAGSIHRASGVCRCIFFFLVASLAAPREGCAV, NN: MAGSIHRASGVCRCIFFFLVASLAAPREGCAV	5	0.0599165	27.0442	27.0354	27.0997	NaN			9.1449e-09	7	5.2	3	2	2	0	8.70193	8.19226	8.20393	8.2737	NaN	79.261
TGVEG_221210;TGME49_221210;TGGT1_221210	cyclophilin	HMM: MKLVLFFLALAVSGAVAE, NN: MKLVLFFLALAVSGAVAE;HMM: MKLVLLFLALAVSGAVAE, NN: MKLVLLFLALAVSGAVAE	0	0.0251236	32.2431	32.5381	32.3113	32.5201			1.9863e-104	99	72.6	11	11	11	10	10.433	9.71321	9.93832	9.83882	9.80335	19.638
TGVEG_221320;TGME49_221320;TGGT1_221320	acetyl-CoA carboxylase ACC1	HMM: MPIRTHARVRSVCTMGVVSRAAAA, NN: MPIRTHARVRSVCTMGVVSRAAAA;HMM: MPTRTHARVRSVCTMGVVSRAAAA, NN: MPTRTHARVRSVCTMGVVSRAAAA	1	NaN	NaN	26.5455	NaN	NaN			1.2846e-12	5	2.5	2	5	1	2	8.42549	7.55582	8.08443	6.67799	8.01783	287.58
TGVEG_221380;TGME49_221380;TGGT1_221380	alba 1	N/A	0	-0.429385	30.606	30.3463	29.9463	30.1472			2.5648e-28	43	35.6	9	6	8	5	9.7858	9.31979	9.20104	9.14233	9.01778	27.258
TGVEG_221470;TGME49_221470;TGGT1_221470	hypothetical protein	N/A	0	-0.213778	29.9177	30.0331	29.7909	29.7324			8.7283e-48	45	25	7	11	11	8	9.67249	8.92914	9.16814	9.16991	8.95576	61.617
TGVEG_221490;TGME49_221490;TGGT1_221490	cell cycle regulator protein	N/A	0	NaN	NaN	NaN	24.512	NaN			0.0017309	2	4.4	1	0	1	0	7.52186	NaN	NaN	7.52186	NaN	20.084
TGVEG_221510;TGME49_221510;TGGT1_221510	hypothetical protein	HMM: MAFASVCAKLPALARGSVGK, NN: MAFASVCAKLPALARGS	0	NaN	NaN	NaN	NaN	27.6946			6.2064e-05	4	20.1	0	1	1	2	8.7241	NaN	8.09363	8.23078	8.37218	17.913
TGVEG_221620;TGME49_221620;TGGT1_221620;TGVEG_212240;TGME49_212240;TGGT1_212240	beta-1 tubulin, putative;beta-tubulin, putative;putative beta-1 tubulin;putative beta-tubulin	N/A	0	0.0536337	28.4474	28.9066	28.7502	28.711			2.8262e-277	23	60.8	3	3	3	3	9.31401	8.70085	8.7577	8.74569	8.63281	50.037
TGVEG_221670;TGME49_221670;TGGT1_221670	transcriptional elongation factor FACT140	N/A	0	NaN	NaN	NaN	25.1845	NaN			1.5851e-19	5	3.7	1	1	2	1	8.08672	7.09096	7.15594	7.72433	7.62779	134.6
TGVEG_221950;TGME49_221950;TGGT1_221950	putative splicesome-associated protein;splicesome-associated protein, putative	N/A	0	NaN	NaN	NaN	NaN	25.1781			1.5029e-11	5	8.8	3	0	1	2	8.04372	7.65724	NaN	7.38008	7.61463	64.911
TGVEG_222020;TGME49_222020;TGGT1_222020	phosphoglycerate kinase PGKII	N/A	0	-0.273545	NaN	27.6906	27.3352	27.4989			1.5063e-13	12	10.1	2	3	4	2	8.93494	8.1245	7.88129	8.63042	8.35141	63.05
TGVEG_222160;TGME49_222160;TGGT1_222160	aldehyde dehydrogenase	N/A	0	NaN	NaN	NaN	24.8694	NaN			2.8366e-08	2	4.6	1	1	1	0	8.11167	7.64136	7.63276	7.62945	NaN	53.729
TGVEG_222170;TGME49_222170;TGGT1_222170	dense-granule antigen DG32	N/A	0	0.0827284	28.8388	29.4882	29.1877	29.3048			6.7223e-24	43	25.7	4	8	9	7	9.47682	8.59998	9.02959	8.90702	8.85854	33.637
TGVEG_222220;TGME49_222220;TGGT1_222220	alveolin domain containing intermediate filament IMC7	N/A	0	-0.616325	29.6901	29.7118	29.3043	28.865			2.3879e-82	39	38.9	10	10	7	6	9.53706	8.91649	9.10096	8.98667	8.58816	46.784
TGVEG_222380;TGME49_222380;TGGT1_222380	importin-beta N-terminal domain-containing protein	N/A	0	-0.253467	27.8772	27.7187	27.5017	27.5873			1.3176e-39	21	11.8	7	6	4	8	8.98692	8.46998	8.30311	8.2417	8.47683	129.49
TGVEG_222840;TGME49_222840;TGGT1_222840	Ser/Thr phosphatase family protein	HMM: MLRVAEYIAILLRWPRFGVLGA, NN: MLRVAEYIAILLRWPRFGVLGA;N/A	0	NaN	25.3947	NaN	NaN	NaN			4.7538e-06	3	7.4	2	1	0	0	7.90715	7.64457	7.56394	NaN	NaN	48.167
TGVEG_222860;TGME49_222860;TGGT1_222860	eukaryotic translation initiation factor, putative;putative eukaryotic translation initiation factor	N/A	0	-0.0396013	30.9351	31.0445	30.9566	30.9438			2.9616e-103	79	32.5	15	19	18	16	9.99932	9.26614	9.47478	9.46234	9.35319	88.391
TGVEG_222952;TGME49_222952;TGGT1_222952	phosphohistidine phosphatase	N/A	0	NaN	NaN	NaN	26.4406	NaN			0.00043364	1	6	1	0	2	1	8.28262	7.5272	NaN	8.10243	7.49739	42.011
TGVEG_223020;TGME49_223020;TGGT1_223020	coproporphyrinogen III oxidase	N/A	0	NaN	NaN	24.3896	NaN	NaN			0.0023652	2	3.6	1	1	0	0	7.63689	7.20642	7.43545	NaN	NaN	41.733
TGVEG_223040;TGGT1_223040;TGME49_223040	hypothetical protein	N/A	0	0.253591	NaN	27.5287	27.6479	27.9166			1.3253e-23	14	34.3	0	5	5	4	8.91417	NaN	8.47783	8.50399	8.30328	27.46
TGVEG_223050;TGME49_223050;TGGT1_223050	ribosomal protein RPS20	N/A	0	-0.289922	31.5986	31.3251	31.2194	31.1244			1.4637e-39	43	27	7	7	9	6	10.1031	9.47651	9.52699	9.56868	9.41712	25.899
TGVEG_223140;TGME49_223140;TGGT1_223140	tRNA binding domain-containing protein	HMM: MELIYDSTPAALATVLLARYVQPCLLQ, NN: MELIYDSTPAALATVLLARYVQPCLLQ	0	-0.14255	27.6885	27.2832	27.2989	27.3877			7.949e-35	18	17.4	4	4	4	3	8.9296	8.33616	8.3625	8.42553	8.13574	51.026
TGVEG_223390;TGME49_223390;TGGT1_223390	activating signal cointegrator 1 complex subunit 3 family 1 ASCC3L1, putative;putative activating signal cointegrator 1 complex subunit 3 family 1 ASCC3L1	N/A	0	0.221551	27.2882	27.7401	28.0366	27.4348			2.175e-40	25	8.5	5	10	4	8	9.00056	8.1991	8.60972	8.33304	8.34382	248.41
TGVEG_223410;TGME49_223410;TGGT1_223410	eukaryotic initiation factor-4E, putative;putative eukaryotic initiation factor-4E	N/A	0	-0.148574	28.4935	28.3402	28.4895	28.047			6.4655e-18	14	25.3	4	4	3	4	9.2017	8.63033	8.73601	8.50926	8.4723	25.981
TGVEG_223485;TGGT1_223485	hypothetical protein	HMM: MRVPGFPSLTFRADSLLVQCCIAACVWYGPQDAAAV, NN: MRVPGFPSLTFRADSLLVQCCIAA	0	0.149828	26.2746	NaN	26.4244	NaN			2.2284e-15	8	25.8	2	2	2	2	8.56831	7.88348	7.88826	8.11972	7.92717	10.307
TGVEG_223540;TGME49_223540;TGGT1_223540	importin-beta N-terminal domain-containing protein	N/A	0	-0.0128708	NaN	25.9951	NaN	25.9822			3.2775e-27	10	7.8	3	2	4	2	8.56476	7.74253	7.92548	8.19537	7.84978	122.13
TGVEG_223680;TGME49_223680;TGGT1_223680	ubiquitin family protein	N/A	0	-0.0857534	NaN	27.5766	27.5943	27.3873			4.7129e-35	13	18	1	4	4	4	8.8733	7.45656	8.39019	8.43823	8.29769	41.747
TGVEG_223710;TGME49_223710;TGGT1_223710	tetratricopeptide repeat-containing protein	N/A	0	NaN	NaN	25.304	NaN	NaN			2.0058e-07	6	2.1	1	2	2	1	8.05744	NaN	7.71072	7.54214	7.44598	109.19
TGVEG_223930;TGME49_223930;TGGT1_223930	RNA recognition motif-containing protein	N/A	0	NaN	25.9044	NaN	NaN	NaN			1.0852e-07	4	7.3	3	2	1	2	8.38214	7.79801	7.92164	7.6712	7.68002	40.671
TGVEG_223960;TGME49_223960;TGGT1_223960	ubiquitin interaction motif family protein	N/A	0	NaN	27.3277	NaN	NaN	NaN			2.3049e-20	5	22.7	3	4	2	1	8.6657	8.22645	8.26996	7.89071	7.48775	41.377
TGVEG_224060;TGME49_224060;TGGT1_224060	putative thioredoxin;thioredoxin, putative	HMM: MAPRTSLALLALYALVSTSSHLLPDSFPPSFSSLSLSGVSAA, NN: MAPRTSLALLALYALVSTSSHLL	0	-0.369088	29.3181	29.5292	28.8838	29.2254			1.0964e-73	38	35.2	9	12	12	7	9.48653	8.76615	9.05135	8.93619	8.69303	68.947
TGVEG_224130;TGME49_224130;TGGT1_224130	hypothetical protein;RNA recognition motif (A.K.A RRM, RBD, or RNP domain) protein	N/A	0	NaN	25.159	25.6433	NaN	NaN			4.4113e-07	6	16.9	2	2	1	2	8.22796	7.43532	7.89019	7.48389	7.52705	16.631
TGVEG_224350;TGME49_224350;TGGT1_224350A	aminopeptidase N, putative;putative aminopeptidase N	N/A	0;1	0.066433	30.4256	30.6503	30.6096	30.5991			1.3478e-97	89	24.7	19	20	23	20	9.88098	9.13564	9.31704	9.37869	9.24788	156.88
TGVEG_224460;TGME49_224460;TGGT1_224460	aminopeptidase n, putative;putative aminopeptidase n	HMM: MVTLSATTMNATVSPCRISGGVSSRLCGWGVLSFLLASVITVQVSRAG, NN: MVTLSATTMNATVSPCRISGGVSSRLCGWGVLSFLLASVITVQVSRAG	0	-0.0264759	31.6657	31.9614	31.7829	31.7912			1.197e-204	140	41.4	26	27	32	28	10.2527	9.53107	9.71166	9.73595	9.59137	108.75
TGVEG_224900;TGME49_224900;TGGT1_224900	adenylate kinase, putative;putative adenylate kinase	N/A	0	-0.492505	28.3983	28.6408	27.7697	28.2844			2.4375e-31	23	33.5	6	4	6	5	9.18534	8.66139	8.36175	8.66612	8.58001	28.56
TGVEG_224910;TGME49_224910;TGGT1_224910	divalent cation tolerance protein, CutA1 family protein	HMM: MVPRMWRVGGLRRPFGVRPDVLVSCSLLLSPILYRLASSHSTSSVPLLSAASLFSSASLLSSA, NN: MVPRMWRVGGLRRPFGVRPDVLVSCSLLLSPILYRLASSH	0	NaN	NaN	26.3396	NaN	NaN			1.9684e-05	2	9	0	2	1	1	8.15011	NaN	8.02247	7.21434	7.29239	27.579
TGVEG_225060;TGME49_225060;TGGT1_225060	nucleoredoxin family protein	N/A	0	NaN	NaN	NaN	NaN	25.8935			0.00024049	2	3.1	0	1	0	1	8.08379	NaN	7.72976	NaN	7.83	45.269
TGVEG_225080;TGME49_225080;TGGT1_225080	ribosomal protein RPS18	N/A	0	-0.0775795	32.2191	32.205	32.158	32.111			7.9476e-49	64	55.1	8	8	8	9	10.3614	9.71185	9.78312	9.81781	9.71507	17.722
TGVEG_225150;TGME49_225150;TGGT1_225150	hypothetical protein;putative transmembrane protein	HMM: MRTQWQLLAFMWICGVHSCAGS, NN: MRTQWQLLAFMWICGVHSCAGS	2	NaN	NaN	NaN	26.1489	NaN			3.6719e-06	3	4.1	0	1	2	1	8.14095	NaN	7.23847	8.01465	7.24541	76.849
TGVEG_225160;TGME49_225160;TGGT1_225160	hypothetical protein;putative transmembrane protein	HMM: MDAQRSSRFQQVKASIIQLVYWCLLNATMVLPI, NN: MDAQRSSRFQQVKASIIQLVYWCLLNATMVLPIFCV	2	NaN	NaN	NaN	NaN	26.3027			7.1846e-13	2	10	0	1	2	2	8.36431	NaN	7.56691	8.01995	7.95318	45.387
TGVEG_225310;TGME49_225310;TGGT1_225310	ARF1-directed GTPase-activating protein, putative;putative ARF1-directed GTPase-activating protein	N/A	0	NaN	NaN	NaN	25.7611	NaN			0.0044955	2	2.6	0	1	1	0	8.20833	NaN	7.91652	7.89787	NaN	52.458
TGVEG_225730;TGME49_225730;TGGT1_225730	membrane protein, putative;putative membrane protein	N/A	0	-0.336067	NaN	27.87	27.6534	27.4146			6.0264e-06	6	15.6	1	2	2	2	8.97342	8.17484	8.52243	8.43821	8.26432	14.904
TGVEG_225930;TGME49_225930;TGGT1_225930	triose-phosphate isomerase TPI-I	N/A	0	-0.117401	29.9047	30.2091	29.9138	29.9651			4.7513e-36	45	37.5	8	6	8	8	9.70401	9.02024	9.17883	9.11684	9.07646	27.89
TGVEG_225940;TGME49_225940;TGGT1_225940	hypothetical protein	N/A	0	NaN	NaN	26.1037	NaN	NaN			1.8915e-08	5	9.5	1	2	2	1	8.36635	7.7813	7.95142	7.77866	7.35284	33.734
TGVEG_226000;TGME49_226000;TGGT1_226000	ATP synthase, putative;putative ATP synthase	HMM: MFARAFSRFASLAAPAPQRGWNAFVLPSRHFATAAGGA, NN: MFARAFSRFASLAAPAPQRGWNAFVLPSRHFATAAGGA	0	-0.257622	NaN	27.0492	NaN	26.7915			7.3778e-20	11	16.4	1	2	1	2	8.71542	7.94088	8.24217	8.12555	8.0929	19.457
TGVEG_226072;TGGT1_226072;TGME49_226072	Ser/Thr phosphatase family protein	N/A	0	NaN	NaN	24.7016	NaN	NaN			0.00031629	1	1.6	0	1	0	0	7.52935	NaN	7.52935	NaN	NaN	88.425
TGVEG_226250;TGME49_226250;TGGT1_226250	DEAD (Asp-Glu-Ala-Asp) box polypeptide DDX3X	N/A	0	0.00846195	30.7346	30.9693	30.9172	30.8036			1.0106e-149	101	43.2	16	19	19	15	9.97327	9.22412	9.45278	9.50492	9.22861	78.592
TGVEG_226320;TGME49_226320;TGGT1_226320	hypothetical protein	N/A	0	NaN	NaN	NaN	22.9989	NaN			0.00085117	1	1.4	0	0	1	0	7.0664	NaN	NaN	7.0664	NaN	73.693
TGVEG_226420;TGME49_226420;TGGT1_226420	peptidase family M3 protein	HMM: MISPVASVFSTMPHWKQGARLHAPGGRFTFAARIYLFLLLSCLGFSCSGE, NN: MISPVASVFSTMPHWKQGARLHAPGGRFTFAARIYLFLLLSCLGF	0	NaN	NaN	NaN	NaN	24.0623			0.00036653	2	1.8	0	0	1	1	7.53031	NaN	NaN	7.17345	7.27873	75.411
TGVEG_226430;TGME49_226430;TGGT1_226430	reticulon protein	N/A	3	NaN	NaN	NaN	NaN	27.1103			2.9494e-06	8	9.2	1	1	1	1	8.87154	8.19882	8.28526	8.37269	8.19626	21.592
TGVEG_226590;TGME49_226590;TGGT1_226590	cytochrome C oxidase subunit IIa, putative;putative cytochrome C oxidase subunit IIa	HMM: MLAYFAASRELALVFCVGTTLPE, NN: MLAYFAASRELALVFCVGTTLPE;HMM: MLAYFAASRELAVVFCVGTTLPE, NN: MLAYFAASRELAVVFCV	1	-0.160318	NaN	27.226	NaN	27.0657			2.4958e-06	8	9.4	1	3	1	3	8.7403	7.96298	8.27349	8.04902	8.19986	34.488
TGVEG_226710;TGME49_226710;TGGT1_226710	hypothetical protein;putative transmembrane protein	HMM: MRFPASAASRPLLSLLALLLLANSRLAVAT, NN: MRFPASAASRPLLSLLALLLLANSRLAVAT	4;6	NaN	NaN	NaN	NaN	25.4527			0.0070934	6	6.4	1	1	1	1	8.2412	7.45831	7.6694	7.69029	7.69731	33.286
TGVEG_226730;TGGT1_226730;TGME49_226730	aconitate hydratase ACN/IRP	HMM: MRILVPLVFLAAQIPPASLE, NN: MRILVPLVFLAAQIPPASLE	0	-0.0226164	30.209	30.5641	30.2638	30.464			9.0856e-82	63	25.4	16	14	16	16	9.81712	9.16539	9.24665	9.25283	9.18898	114.87
TGVEG_226910;TGME49_226910;TGGT1_226910	Amylo-alpha-1,6-glucosidase	N/A	0	-0.0873642	25.9348	26.2403	26.196	25.8043			4.4591e-14	12	3.9	2	3	4	3	8.53081	7.39005	8.06573	8.04712	7.94019	207.77
TGVEG_226960;TGME49_226960;TGGT1_226960	phosphofructokinase PFKII	N/A	0	-0.0627632	32.6428	32.6728	32.6311	32.559			0	237	44.8	38	34	38	30	10.5007	9.83031	9.9539	9.97248	9.81483	131.36
TGVEG_226970;TGME49_226970;TGGT1_226970	ribosomal protein RPS11	N/A	0	-0.105455	32.1401	31.872	31.694	32.1072			1.9084e-41	45	60.9	10	8	9	7	10.2879	9.67674	9.60888	9.70598	9.74121	18.677
TGVEG_226980;TGME49_226980;TGGT1_226980	hypothetical protein;translation initiation factor eIF3 subunit	N/A	0	-0.0240698	26.8025	26.5645	26.5217	26.7972			5.3511e-15	14	37	4	3	4	3	8.69562	8.1712	8.05396	8.11959	8.01246	25.324
TGVEG_227030;TGME49_227030;TGGT1_227030	hypothetical protein	N/A	0	0.134148	27.7774	27.7174	27.9097	27.8535			3.4771e-13	12	25.9	3	4	2	4	9.04352	8.28341	8.57107	8.35324	8.49881	18.687
TGVEG_227280;TGGT1_227280;TGME49_227280	dense granule protein GRA3	HMM: MDRTICPFFIQSFTMSTALKRLIPFLVPFVVFLVAAALGGLAA, NN: MDRTICPFFIQSFTMSTALKRLIPFLVPFVVFLVAAALGGLAAD	2	-0.0986805	33.7675	33.715	33.5302	33.7549			3.7927e-61	298	26.1	11	12	11	12	10.836	10.1966	10.2822	10.2428	10.2091	24.18
TGVEG_227290;TGME49_227290;TGGT1_227290	histone deacetylase HDAC3	N/A	0	NaN	24.7644	NaN	NaN	NaN			1.6304e-07	3	7.8	1	1	0	1	7.78503	7.45483	NaN	NaN	7.51132	50.457
TGVEG_227360;TGME49_227360;TGGT1_227360	ribosomal protein RPL3	N/A	0	-0.277948	32.2377	32.2357	32.056	31.8615			1.2236e-99	111	49.4	15	15	19	17	10.3544	9.71389	9.80309	9.80378	9.67423	44.056
TGVEG_227600;TGME49_227600;TGGT1_227600	ribosomal protein RPL34	N/A	0	-0.205561	34.6908	34.3938	34.3259	34.3476		+	2.5043e-16	45	29.1	5	5	5	5	11.0392	10.4284	10.4591	10.4699	10.3864	15.383
TGVEG_227650;TGME49_227650;TGGT1_227650	microtubule-associated protein RP/EB family, putative;putative microtubule-associated protein RP/EB family	N/A	0	NaN	28.3692	NaN	NaN	NaN			0.0002271	2	4.4	2	0	0	0	8.53997	8.53997	NaN	NaN	NaN	45.704
TGVEG_227840;TGME49_227840;TGGT1_227840	Memo family protein	N/A	0	NaN	NaN	NaN	NaN	24.2637			0.00029021	1	8.6	0	0	0	1	7.33937	NaN	NaN	NaN	7.33937	33.336
TGVEG_227910;TGME49_227910;TGGT1_227910	hypothetical protein;putative vivax protein	N/A	0	-0.263703	NaN	28.5001	27.9559	28.5169			3.1182e-22	16	37.7	1	3	3	3	9.10507	7.05316	8.65629	8.63492	8.57717	14.374
TGVEG_227960;TGME49_227960;TGGT1_227960	PCI domain-containing protein	N/A	0	0.0942917	27.7238	27.7154	27.8291	27.7987			1.1124e-35	25	20.8	5	4	6	5	9.03945	8.31139	8.31542	8.63679	8.3983	55.682
TGVEG_228190;TGME49_228190;TGGT1_228190	eukaryotic initiation factor-3, subunit 5, putative;putative eukaryotic initiation factor-3, subunit 5	N/A	0	-0.353084	29.1831	29.1374	28.7344	28.88			3.0893e-32	29	18.2	6	5	6	5	9.39491	8.85811	8.83756	8.79065	8.65884	38.069
TGVEG_228210;TGME49_228210;TGGT1_228210	26S proteasome regulatory subunit	N/A	0	0.194562	27.4468	27.9144	27.8922	27.8581			1.7807e-54	25	27.6	6	5	3	5	9.03011	8.43006	8.50809	8.33292	8.42351	44.425
TGVEG_228290;TGME49_228290;TGGT1_228290	phospholipase/carboxylesterase	N/A	0	NaN	NaN	NaN	28.1211	NaN			2.0013e-11	4	15.3	1	1	2	1	8.7372	7.30685	7.23877	8.60833	8.01111	51.906
TGVEG_228360;TGME49_228360;TGGT1_228360	peptidyl-prolyl isomerase FKBP12, putative;putative peptidyl-prolyl isomerase FKBP12	HMM: MQTRSASRAAAAAAAGVCGE, NN: MQTRSASRAAAAAAAGVCGEEASETE	1	NaN	NaN	NaN	26.1611	NaN			5.959e-29	3	5.8	1	1	1	0	8.50391	8.1023	7.94558	8.01833	NaN	38.175
TGVEG_228470;TGME49_228470;TGGT1_228470	ribosomal protein RPL15	N/A	0	0.226849	30.6588	30.8216	30.8665	31.0676			4.0264e-28	52	39.5	8	8	9	5	9.96835	9.23734	9.37586	9.49336	9.31798	24.325
TGVEG_228490;TGME49_228490;TGGT1_228490;REV__TGVEG_223750;REV__TGME49_223750;REV__TGGT1_223750	hypothetical protein;p21-carboxy-terminal region-binding protein	N/A	0	NaN	25.4244	NaN	NaN	NaN			1.0798e-06	2	5.6	1	1	0	0	7.65351	7.65351	NaN	NaN	NaN	43.213
TGVEG_228630;TGME49_228630;TGGT1_228630	hypothetical protein;putative transmembrane protein	HMM: MAHSRERRSPSCLVSPLSPPTASGQ, NN: MAHSRERRSPSCLVSPLSPPTASGQ;N/A	1	NaN	NaN	NaN	25.6768	NaN			7.535e-16	3	17.1	1	1	1	0	8.10065	7.71195	NaN	7.87251	NaN	34.744
TGVEG_228760;TGGT1_228760;TGME49_228760	hypothetical protein	N/A	0	-0.196003	28.3474	27.915	27.8334	28.037			4.2264e-25	23	19.4	4	4	5	6	9.10985	8.37969	8.44742	8.50307	8.65272	49.276
TGVEG_229000;TGME49_229000;TGGT1_229000	kelch repeat-containing protein	N/A	0	-0.655835	27.1375	27.0366	26.4312	NaN			1.9018e-18	12	16.1	5	3	3	2	8.74716	8.20415	8.24785	8.00685	8.07958	68.112
TGVEG_229140;TGME49_229140;TGGT1_229140	MaoC family domain-containing protein	N/A	0	0.0621328	27.6564	27.6659	27.6239	27.8226			4.3532e-22	13	19.1	5	2	3	3	8.99762	8.50036	8.23802	8.41734	8.38675	35.939
TGVEG_229180;TGME49_229180;TGGT1_229180	HEAT repeat-containing protein	N/A	0	0.239606	27.8674	28.5307	28.322	28.5553			2.2478e-53	31	10.1	6	7	8	5	9.21029	8.48011	8.68806	8.69718	8.52543	136.16
TGVEG_229250A;TGGT1_229250A;TGME49_229250	ribosomal protein RPL28	N/A	0	-0.288772	28.6946	27.7405	28.4282	27.4294			1.4937e-08	11	43.2	3	2	4	2	9.15872	8.63621	8.30835	8.83456	8.08597	8.3447
TGVEG_229420;TGME49_229420;TGGT1_229420	cytochrome c, putative;putative cytochrome c	N/A	0	-0.839031	NaN	27.1386	26.2996	NaN			2.3293e-16	6	17.2	1	2	2	1	8.54883	7.55377	8.28443	8.01874	7.32556	18.1
TGVEG_229650;TGME49_229650;TGGT1_229650	josephin protein	N/A	0	NaN	NaN	27.1704	NaN	NaN			3.0495e-07	8	6.1	1	3	1	1	8.46382	7.35413	8.27254	7.56271	7.64853	46.795
TGVEG_229670;TGME49_229670;TGGT1_229670	ribosomal protein RPS23	N/A	0	-0.0168495	31.3364	31.3275	31.1742	31.456			3.1421e-62	45	44.1	4	6	6	5	10.1018	9.38741	9.53381	9.52354	9.53723	15.801
TGVEG_229690;TGME49_229690;TGGT1_229690	autophagy-related protein 7 atg7, putative;putative autophagy-related protein 7 atg7	N/A	0	NaN	NaN	NaN	22.7655	NaN			0.0011413	1	1.4	0	0	1	0	6.99613	NaN	NaN	6.99613	NaN	143.7
TGVEG_229920;TGME49_229920;TGGT1_229920	hypothetical protein;putative transmembrane protein	HMM: MATTARQLFLPFAGMRPVGAA, NN: MATTARQLFLPFAGMRPVGAA	1	0.357158	28.1551	28.494	28.5538	28.8097			1.1985e-29	23	43	5	8	6	5	9.26727	8.40322	8.82132	8.72531	8.60565	34.951
TGVEG_229930;TGME49_229930;TGGT1_229930	p25-alpha family protein	N/A	0	-0.0769558	25.4907	NaN	25.4137	NaN			6.9003e-11	5	16	2	1	2	1	8.21558	7.6733	7.44861	7.79348	7.42977	17.34
TGVEG_229950;TGME49_229950;TGGT1_229950	26S proteasome regulatory subunit 6b, putative;putative 26S proteasome regulatory subunit 6b	N/A	0	NaN	NaN	NaN	27.2974	NaN			1.4374e-31	7	25.4	1	1	3	2	8.71849	7.89333	7.97364	8.36037	8.08415	46.093
TGVEG_229990;TGME49_229990;TGGT1_229990	putative T-complex protein 1 subunit alpha;T-complex protein 1 subunit alpha, putative	N/A	0	0.0722971	30.7741	30.7172	30.7023	30.9335			3.8772e-111	85	44.5	14	16	18	17	9.94258	9.14971	9.40938	9.32071	9.42982	59.215
TGVEG_230160;TGGT1_230160;TGME49_230160	hypothetical protein	N/A	0	-0.414963	28.356	28.428	27.9833	27.9708			8.7215e-17	15	40.1	3	3	5	3	9.16994	8.44	8.53759	8.74287	8.48498	15.845
TGVEG_230210;TGME49_230210;TGGT1_230210	alveolin domain containing intermediate filament IMC10	N/A	0	-0.160254	28.5086	29.3742	28.3392	29.2232			1.247e-54	35	27.7	6	9	6	8	9.37882	8.50673	8.99296	8.55658	8.86151	61.187
TGVEG_230340;TGME49_230340;TGGT1_230340	hypothetical protein;putative high molecular mass nuclear antigen	N/A	0	NaN	25.6087	NaN	NaN	NaN			9.1449e-25	4	3.1	2	1	0	1	8.23452	7.70899	7.78107	NaN	7.77835	102.52
TGVEG_230350;TGME49_230350;TGGT1_230350	hypothetical protein;putative transmembrane protein	N/A	4;6	0.494707	NaN	25.8303	26.325	NaN			2.3295e-06	7	2.2	1	2	2	2	8.39298	7.14019	7.91009	8.03603	7.63748	138.88
TGVEG_230380;TGME49_230380;TGGT1_230380	protein translocation complex, SEC61 gamma subunit	HMM: MTRERAQRLLCRLLDFFLGCAALSFVTSLLFASVSSW, NN: MTRERAQRLLCRLLDFFLGCAAL	3	NaN	NaN	NaN	NaN	26.7025			0.0026876	8	5.4	1	1	1	1	8.73883	8.06292	8.16664	8.22337	8.07354	16.8
TGVEG_230410;TGME49_230410;TGGT1_230410	peroxiredoxin PRX3	N/A	0	-0.245241	30.6971	30.3825	30.4673	30.1218			9.2447e-34	32	36.7	8	7	8	6	9.83313	9.21751	9.28493	9.28578	9.11441	30.534
TGVEG_230420;TGME49_230420;TGGT1_230420	sarco/endoplasmic reticulum Ca2+-ATPase	N/A	7	0.0172739	29.011	28.5595	28.867	28.738			1.3523e-57	40	14.3	9	7	7	10	9.33566	8.7256	8.70961	8.71627	8.77934	118.88
TGVEG_230430;TGME49_230430;TGGT1_230430	putative vesicle-associated membrane protein;vesicle-associated membrane protein, putative	HMM: MPLIYALAARGSVVLAE, NN: MPLIYALAARGSVVLAE	3	NaN	25.5197	NaN	NaN	NaN			1.2756e-05	3	11.8	1	1	0	1	8.14079	7.68221	7.67075	NaN	7.63678	24.96
TGVEG_230450;TGME49_230450;TGGT1_230450	bifunctional GMP synthase/glutamine amidotransferase protein	N/A	0	0.0564642	29.199	29.376	29.2413	29.4466			2.2094e-49	50	28.6	10	10	10	11	9.49466	8.85491	8.92695	8.89438	8.89115	62.294
TGVEG_230520;TGME49_230520;TGGT1_230520	cyclophilin 1, putative;putative cyclophilin 1	N/A	0	0.0167751	28.7213	28.3395	28.587	28.5074			1.1638e-35	30	39.7	7	7	9	4	9.26919	8.68563	8.63134	8.82353	8.44671	26.224
TGVEG_230960;TGME49_230960;TGGT1_230960	putative splicing factor 3b, subunit 3;splicing factor 3b, subunit 3, putative	N/A	0	0.329509	25.9294	26.6003	NaN	26.5943			9.4474e-19	9	5.9	3	3	1	4	8.53998	7.8836	8.02169	7.703	8.05934	135.74
TGVEG_231080;TGME49_231080;TGGT1_231080	ribosomal protein RPL38	N/A	0	-0.257479	29.3536	29.1335	28.8564	29.1158			4.8407e-11	18	41.7	3	2	4	4	9.45624	8.77027	8.74653	8.90814	8.9556	9.5832
TGVEG_231100;TGME49_231100;TGGT1_231100	hypothetical protein;putative transmembrane protein	N/A	1	NaN	NaN	NaN	26.04	NaN			2.8284e-05	2	3.7	0	0	2	0	7.98185	NaN	NaN	7.98185	NaN	53.823
TGVEG_231140;TGME49_231140;TGGT1_231140	hypothetical protein;ribosomal protein RPS25	N/A	0	-0.238121	32.24	32.2791	32.0157	32.0271			6.9142e-65	73	44.1	9	12	10	9	10.3413	9.81621	9.76786	9.71901	9.63301	18.682
TGVEG_231160;TGME49_231160;TGGT1_231160	hypothetical protein	N/A	0	NaN	NaN	NaN	NaN	26.8623			6.566e-10	8	10.7	1	1	1	1	8.89818	8.48136	8.23955	8.26043	8.12163	18.281
TGVEG_231190;TGME49_231190;TGGT1_231190	arsenite-activated ATPase family protein	N/A	0	-0.379229	26.8946	26.413	26.2053	26.3438			4.1894e-08	7	8.6	3	2	2	2	8.63233	8.1848	8.01393	7.96652	7.90301	44.049
TGVEG_231210;TGME49_231210;TGGT1_231210	sarcalumenin/eps15 family protein	N/A	0	0.56567	NaN	25.6471	26.2128	NaN			1.4987e-12	7	8.8	2	3	2	1	8.4221	7.8348	7.98513	7.86232	7.4228	65.562
TGVEG_231440;TGME49_231440;TGGT1_231440	LsmAD domain-containing protein	N/A	0	NaN	NaN	NaN	24.7608	NaN			0.0025426	1	0.7	0	0	1	0	7.59676	NaN	NaN	7.59676	NaN	148.26
TGVEG_231480;TGME49_231480;TGGT1_231480	GCN1, putative;putative GCN1	N/A	0	NaN	NaN	NaN	24.6187	NaN			5.9954e-13	4	1.1	1	0	2	1	7.79666	NaN	NaN	7.554	7.42818	362.62
TGVEG_231600;TGME49_231600;TGGT1_231600	HEAT repeat-containing protein	N/A	0	0.118855	27.0026	27.3951	27.1017	27.5337			1.1269e-63	24	12.3	5	8	5	5	8.88365	8.20855	8.41387	8.28074	8.18506	128.09
TGVEG_231630;TGME49_231630;TGGT1_231630	alveolin domain containing intermediate filament IMC4	N/A	0	-0.396099	31.885	31.7933	31.4378	31.4483		+	3.8172e-49	68	35.2	11	9	11	8	10.1985	9.64288	9.66428	9.59199	9.45864	50.171
TGVEG_231640;TGME49_231640;TGGT1_231640	alveolin domain containing intermediate filament IMC1	N/A	0	-0.238665	32.4138	32.4695	32.1464	32.2596		+	6.5833e-178	146	48.9	22	23	23	22	10.4126	9.76782	9.8973	9.83253	9.72453	69.596
TGVEG_231850;TGME49_231850;TGGT1_231850	serine-threonine phosophatase 2C (PP2C)	N/A	0	-0.0497313	31.0684	31.2784	31.1988	31.0486			1.3058e-122	74	45.3	14	9	11	11	10.0567	9.39564	9.48705	9.52453	9.39676	36.79
TGVEG_231910;TGME49_231910;TGGT1_231910	ATP synthase F1 gamma subunit	HMM: MAGLASLSSVGALRGMRLVPAAHLLPLHSAFGQ, NN: MAGLASLSSVGALRGMRLVPAAHLLPLHSAFGQ	0	NaN	25.4686	NaN	NaN	NaN			2.381e-14	6	14.3	2	2	1	1	8.46953	7.66681	8.09198	7.82027	7.76839	34.53
TGVEG_231970;TGME49_231970;TGGT1_231970	pre-mRNA processing splicing factor PRP8	N/A	0	-0.599226	NaN	26.795	NaN	26.1958			5.206e-79	12	10.9	4	6	2	3	8.56153	7.77663	8.32114	7.83663	7.42223	291.84
TGVEG_232030;TGME49_232030;TGGT1_232030	hypothetical protein	N/A	0	NaN	NaN	NaN	NaN	23.2404		+	0.0016447	2	5.3	0	1	0	1	7.43564	NaN	7.21798	NaN	7.03133	23.377
TGVEG_232050;TGME49_232050;TGGT1_232050	DnaJ domain-containing protein	N/A	2	-0.124495	27.6221	27.2112	27.28	27.3043			3.6547e-17	19	7.7	5	3	5	3	8.90967	8.38036	8.1112	8.48579	8.13644	96.128
TGVEG_232150;TGME49_232150;TGGT1_232150	hypothetical protein	N/A	0	NaN	NaN	25.4962	NaN	NaN			0.0013044	0	2	0	2	0	1	7.94509	NaN	7.76857	NaN	7.46882	107.55
TGVEG_232230;TGME49_232230;TGGT1_232230	ribosomal protein RPL30	N/A	0	-0.438398	30.827	30.3926	30.1595	30.1833			9.4492e-57	30	61.1	5	5	6	5	9.82605	9.2418	9.2694	9.25592	9.1114	11.661
TGVEG_232300;TGME49_232300;TGGT1_232300	ribosomal protein RPS3	HMM: MLWFHSRREQGTHGGLLWLLCVCRLQ, NN: MLWFHSRREQGTHGGLLWLLCVCRLQTCK;HMM: MLWFHSRREQRTHGGLLWLLCVCRLQ, NN: MLWFHSRREQRTHGGLLWLLCVCRLQTCK	0	-0.135075	32.0296	32.01	31.865	31.9043			9.9985e-61	76	56.9	13	8	9	8	10.2941	9.68899	9.70622	9.7376	9.6283	28.736
TGVEG_232350;TGME49_232350;TGGT1_232350	lactate dehydrogenase LDH1	N/A	0	-0.0442429	33.6319	33.7415	33.5894	33.6955			2.0995e-179	195	77.8	20	20	16	20	10.821	10.152	10.2481	10.272	10.1937	35.548
TGVEG_232410;TGME49_232410;TGGT1_232410	PDI family protein	N/A	0	-0.64618	30.3073	29.434	29.2147	29.2342			1.0762e-34	31	46.4	8	8	8	7	9.57756	9.13672	8.92183	8.96682	8.81218	24.909
TGVEG_232440;TGME49_232440;TGGT1_232440	Brf1p family coiled coil protein	N/A	0	-0.141231	31.311	31.2057	31.0941	31.14			6.2322e-110	87	41.5	15	17	17	14	10.0634	9.40423	9.50795	9.53608	9.37643	54.044
TGVEG_232475;TGME49_232475;TGGT1_232475	hypothetical protein;putative paramyosin	N/A	0	NaN	27.5511	NaN	NaN	NaN			0.0006361	2	2	2	1	0	0	8.47818	8.29369	8.01733	NaN	NaN	90.315
TGVEG_232600;TGME49_232600;TGGT1_232600	phospholipase, patatin family protein	HMM: MMKGNSVSLRSLSLCLLFSLLLFSFCMDTRSSAT, NN: MMKGNSVSLRSLSLCLLFSLLLFSFCM	0	-0.0259714	26.8873	27.1637	26.9098	27.0893			6.0618e-19	13	8.9	2	3	3	4	8.80596	7.86787	8.16447	8.24122	8.39023	70.81
TGVEG_232660;TGGT1_232660;TGME49_232660	Hsp70 interacting protein HIP	N/A	0	-0.0918427	28.6569	28.741	28.5685	28.6458			2.8538e-50	22	22.4	5	5	5	5	9.29035	8.75389	8.75418	8.6372	8.58267	45.158
TGVEG_232710;TGME49_232710;TGGT1_232710	ribosomal protein RPS3A	N/A	0	-0.161243	32.9232	32.8371	32.7806	32.6572			2.3647e-227	146	73.7	22	22	23	19	10.5522	9.9258	9.97884	10.0311	9.84302	29.371
TGVEG_232830;TGME49_232830;TGGT1_232830	putative vacuolar proton translocating ATPase subunit A;vacuolar proton translocating ATPase subunit A, putative	HMM: MTTLRSEPMLRGTLVLPSALPLAHGC, NN: MTTLRSEPMLRGTLVLPSALPLAHGC	6	-0.331375	27.0066	NaN	NaN	26.6752			4.8366e-13	9	5.5	3	2	2	2	8.55694	8.14737	7.80726	7.66076	8.0421	101.08
TGVEG_233100;TGME49_233100;TGGT1_233100	SPFH domain / Band 7 family protein	HMM: MNVDPNVLKRLGGLGAAALATAAGGI, NN: MNVDPNVLKRLGGLGAAALATAAG	1	0.023653	28.63	28.9725	28.7093	28.9405			1.1655e-30	25	32.1	4	7	5	5	9.37361	8.45687	8.95417	8.83668	8.69111	32.061
TGVEG_233110;TGME49_233110;TGGT1_233110	IMP dehydrogenas;IMP dehydrogenasa	N/A	0	-0.160955	29.086	29.2086	28.9611	29.0116			3.1712e-45	30	26.3	6	9	7	6	9.43141	8.54668	9.03719	8.83063	8.76469	59.104
TGVEG_233220;TGME49_233220;TGGT1_233220	hypothetical protein;putative transmembrane protein	HMM: MEQSAGVRRFFSNLSFICTTVALLLLASAGLPISASAE, NN: MEQSAGVRRFFSNLSFICTTVALLLLASAGL;HMM: MEQSAGVRRFFSNLSFIGTTVALLLLASAGLPISASAE, NN: MEQSAGVRRFFSNLSFIGTTVALLLLASAGLPISASAE	2	NaN	NaN	NaN	NaN	24.9405			0.00018582	1	1.1	0	0	0	1	7.5431	NaN	NaN	NaN	7.5431	159.7
TGVEG_233500;TGME49_233500;TGGT1_233500	triose-phosphate isomerase TPI-II	HMM: MSGSASSVHFCAPPQSPFLLTLFISALCLAPSFFARPSNAF, NN: MSGSASSVHFCAPPQSPFLLTLFISALCLAPSFFARPSNAF;HMM: MSGSASSVHFCAPPQSPFLLTLFISALCLAPSFFARPSNAFHLAAGSAA, NN: MSGSASSVHFCAPPQSPFLLTLFISALCLAPSFFARPSNAF	0	0.21115	27.6864	27.7929	27.8743	28.0273			4.6519e-11	9	11.2	3	3	2	2	9.05515	8.41224	8.51431	8.47945	8.39554	39.559
TGVEG_233680;TGME49_233680;TGGT1_233680	nuclear movement family protein	N/A	0	NaN	NaN	NaN	NaN	24.4975			1.6338e-10	3	8.6	1	0	1	1	8.03663	7.6483	NaN	7.58679	7.40975	39.023
TGVEG_233720;TGME49_233720;TGGT1_233720	DNA-directed RNA polymerase II RPBABC8	N/A	0	NaN	NaN	NaN	24.4925	NaN			1.4045e-05	1	9.4	0	0	1	0	7.51601	NaN	NaN	7.51601	NaN	17.057
TGVEG_234190;TGME49_234190;TGGT1_234190	putative serine hydroxymethyltransferase 2;serine hydroxymethyltransferase 2, putative	N/A	0	-0.254769	29.9053	29.7861	29.6883	29.4935			1.8573e-43	37	25.2	9	8	10	5	9.62211	9.06729	9.08386	9.10965	8.71699	65.188
TGVEG_234310;TGGT1_234310;TGME49_234310	casein kinase substrate phosphoprotein PP28;hypothetical protein	N/A	0	NaN	26.0192	NaN	NaN	NaN			2.9579e-05	5	9.7	2	1	1	1	8.20874	7.83255	7.65651	7.56785	7.05656	20.497
TGVEG_234380;TGGT1_234380;TGME49_234380	hypothetical protein	N/A	0	-0.0646992	30.7361	30.7941	30.6555	30.7453			5.5928e-65	71	40.9	14	12	12	10	9.92221	9.30957	9.42257	9.31645	9.20469	38.654
TGVEG_234420;TGME49_234420;TGGT1_234420	ATPase, AAA family protein	N/A	0	NaN	NaN	27.4006	NaN	NaN			2.4836e-11	3	7.5	1	2	0	0	8.40382	7.52777	8.34183	NaN	NaN	66.806
TGVEG_234450;TGME49_234450;TGGT1_234450	ribosomal protein RPS15A	N/A	1	-0.0566349	30.6201	30.5968	30.5657	30.5379			5.7364e-53	52	34.6	7	8	8	7	9.88659	9.21354	9.33415	9.36899	9.19571	26.589
TGVEG_234505;TGME49_234505;TGGT1_234505	phenylalanyl-tRNA synthetase alpha chain A, putative;putative phenylalanyl-tRNA synthetase alpha chain A	N/A	0	0.445151	27.2498	27.4705	27.7048	27.9058			1.6497e-31	18	19.2	5	4	3	3	8.97156	8.40756	8.43533	8.2522	8.36137	59.322
TGVEG_235020;TGME49_235020;TGGT1_235020	COPI protein, putative;putative COPI protein	N/A	0	0.0641518	27.7049	28.0491	27.8786	28.0037			1.7727e-53	23	11.6	4	8	7	8	9.08511	8.09906	8.57624	8.57121	8.53331	137.04
TGVEG_235140;TGGT1_235140;TGME49_235140	hypothetical protein	HMM: PSALLRRCPFLVAGRQPARAVRAA, NN: PSALLRRCPFLVAGRQPARAV;N/A	0	NaN	NaN	NaN	NaN	23.9409			1.0158e-08	2	4.7	1	0	0	1	7.63089	7.40276	NaN	NaN	7.24219	36.682
TGVEG_235160;TGGT1_235160;TGME49_235160	hypothetical protein	HMM: MSQDSSLNSMAGGAMFTGAVSAF, NN: MSQDSSLNSMAGGAMFTGAVSAFPSHAS	0	-0.38897	NaN	27.3552	27.143	26.7895			1.5309e-13	8	2.8	2	3	3	3	8.75029	7.35239	7.89425	8.41867	8.30016	168.09
TGVEG_235340;TGME49_235340;TGGT1_235340	hypothetical protein	N/A	0	NaN	NaN	25.5868	NaN	NaN		+	1.9104e-05	2	3.1	1	2	0	0	7.86573	7.0379	7.79585	NaN	NaN	76.643
TGVEG_235450;TGME49_235450;TGGT1_235450	ubiquitin-conjugating enzyme subfamily protein	N/A	0	NaN	NaN	26.6338	NaN	NaN			1.9893e-09	5	19	1	2	1	1	8.53359	7.48833	8.11099	7.97167	7.94481	25.907
TGVEG_235540;TGME49_235540;TGGT1_235540	eukaryotic initiation factor-2 beta, putative;putative eukaryotic initiation factor-2 beta	N/A	0	-0.114558	28.9552	29.0202	28.9043	28.842			8.634e-86	22	34.2	7	4	5	4	9.3848	8.779	8.78612	8.90844	8.60567	26.233
TGVEG_235690;TGME49_235690;TGGT1_235690	hypothetical protein	N/A	0	NaN	NaN	21.813	NaN	NaN		+	0.0034787	3	3.8	1	1	0	1	7.01774	6.76701	6.65981	NaN	NaN	24.978
TGVEG_235700;TGME49_235700;TGGT1_235700	sedoheptulose-1,7-bisphosphatase	N/A	0	NaN	26.5098	NaN	NaN	NaN			1.4411e-09	6	12.7	3	1	1	1	8.67299	7.98026	7.93188	8.29754	7.96158	35.773
TGVEG_235930;TGME49_235930;TGGT1_235930	domain K- type RNA binding proteins family protein	N/A	0	-0.0740995	30.1104	30.1697	29.9321	30.1998			2.3427e-51	43	25.4	9	9	11	5	9.73896	9.15445	9.18943	9.19413	8.97535	64.264
TGVEG_235970;TGME49_235970;TGGT1_235970	eukaryotic initiation factor-2 gamma, putative;putative eukaryotic initiation factor-2 gamma	N/A	0	0.0337725	30.1226	30.1527	30.05	30.2929			5.6219e-120	56	39.6	11	10	12	10	9.75285	9.03826	9.16501	9.23183	9.14635	50.508
TGVEG_236040;TGME49_236040;TGGT1_236040	fructose-1,6-bisphosphate aldolase;fructose-bisphosphate aldolase, putative;putative fructose-bisphosphate aldolase	N/A	0;1	-0.230295	33.638	33.5679	33.3884	33.3568			1.8439e-155	167	58.4	23	21	19	18	10.773	10.1471	10.2671	10.213	10.0188	46.96
TGVEG_236650;TGME49_236650;TGGT1_236650	DEAD (Asp-Glu-Ala-Asp) box polypeptide 17	N/A	0	-0.0392265	29.8467	30.0251	29.9007	29.8927			2.3453e-93	63	36.9	13	12	12	11	9.68103	9.00962	9.10137	9.17044	9.01364	59.937
TGVEG_236840;TGME49_236840;TGGT1_236840	putative zinc finger (C-x8-C-x5-C-x3-H)-2;zinc finger (C-x8-C-x5-C-x3-H)-2, putative	N/A	0	NaN	NaN	NaN	NaN	24.1382			0.00049111	4	3.5	1	1	1	1	7.94629	7.29221	7.30833	7.45338	7.30159	41.975
TGVEG_236890;TGME49_236890;TGGT1_236890	hypothetical protein;putative transmembrane protein	N/A	2	NaN	NaN	NaN	26.907	NaN			5.1398e-08	2	13.8	0	1	2	1	8.37409	NaN	7.44609	8.24284	7.52874	24.567
TGVEG_236910;TGME49_236910;TGGT1_236910	putative U2 snRNP auxiliary factor;U2 snRNP auxiliary factor, putative	N/A	0	0.00690556	NaN	27.6962	27.6854	27.7209			2.7958e-06	7	12.2	0	3	2	2	8.90723	NaN	8.48598	8.43175	8.36408	29.492
TGVEG_236950;TGME49_236950;TGGT1_236950	hypothetical protein	N/A	0	NaN	NaN	NaN	NaN	26.5413			4.1236e-21	4	17.9	1	1	1	1	8.71627	7.99585	8.15612	8.23576	8.02502	12.489
TGVEG_237015;TGGT1_237015;TGME49_237015	hypothetical protein;putative transmembrane protein	N/A	2	NaN	NaN	NaN	24.1981	NaN			4.6434e-14	4	13.6	1	1	1	1	8.35378	NaN	8.01204	7.4274	7.98346	29.315
TGVEG_237150;TGME49_237150;TGGT1_237150	minor histocompatibility antigen h13, putative;putative minor histocompatibility antigen h13	N/A	8	0.147149	27.4583	26.8819	27.4345	27.2			8.9386e-10	10	8.6	3	2	3	3	8.87867	8.28076	8.05362	8.43707	8.25203	46.228
TGVEG_237180;TGME49_237180;TGGT1_237180	hypothetical protein	HMM: MRVLFWVLLAASISLARGE, NN: MRVLFWVLLAASISLARGE;HMM: MRVLFWVLLAASLSLARGE, NN: MRVLFWVLLAASLSLARGE	0	NaN	NaN	NaN	NaN	27.0149			5.8849e-06	6	12.5	1	2	1	2	8.73229	7.8412	8.34807	8.00234	8.16755	29.155
TGVEG_237220;TGME49_237220;TGGT1_237220	DNA replication licensing factor Mcm7, putative;putative DNA replication licensing factor Mcm7	N/A	0	-0.387537	NaN	26.2872	25.8997	NaN			9.9696e-18	9	5.3	1	3	3	2	8.35019	7.28124	8.06341	7.85211	7.25549	96.758
TGVEG_237250;TGME49_237250;TGGT1_237250	emp24/gp25L/p24 family protein;hypothetical protein	HMM: MHAKMAPGRTTGSSGFWSHLRRAAVEKPAAGKSASFLCVVLFLCVFLPHSTEAV, NN: MHAKMAPGRTTGSSGFWSHLRRAAVEKPAAGKSASFLCVVLFLCVFLPHSTEAV;HMM: MHAKMAPGRTTGSSGFWSLLRRAAVEKPAAGKSASFLCVVLFLCVFLPHSTEAV, NN: MHAKMAPGRTTGSSGFWSLLRRAAVEKPAAGKSASFLCVVLFLCVFLPHSTEAV;HMM: MHAKMAPGRTTGSSGFWSLLTRAAVEKPAAGKSASFLCVLLFLCVFLPHSTEAV, NN: MHAKMAPGRTTGSSGFWSLLTRAAVEKPAAGKSASFLCVLLFLCVFLPHSTEAV	0	0.02495	27.8249	27.6782	27.7765	NaN			3.3995e-23	12	25.5	4	4	5	2	8.96345	8.37561	8.34068	8.57158	7.95332	28.463
TGVEG_237560;TGME49_237560;TGGT1_237560	iron-sulfur cluster protein ISCU	HMM: MALARVRPLFCTAEKWTFHQSQRRFVALASPCFLSTAYGA, NN: MALARVRPLFCTAEKWTFHQSQRRFVALASPCFLSTAYGA;HMM: MALTRVRPLFCTAEKWTFHQSQRRFVALASPCFLSTAYGA, NN: MALTRVRPLFCTAEKWTFHQSQRRFVALASPCFLSTAYGA	0	NaN	NaN	NaN	NaN	25.6257			0.0003166	3	5.9	1	1	0	1	8.23867	7.79051	7.74322	NaN	7.74937	23.775
TGVEG_237880;TGME49_237880;TGGT1_237880	hypothetical protein;putative transmembrane protein	HMM: MLHHSVCFCSARGFIPAMRKFTIVAVVVFALLGCVSWQESAFVRGA, NN: MLHHSVCFCSARGFIPAMRKFTIVAVVVFALLGCVSWQ;HMM: MLHHSVCFCSARGFIPAVRKFTIVAVVVFALLGCVSWQESAFVRGA, NN: MLHHSVCFCSARGFIPAVRKFTIVAVVVFALLGCVSWQ	1	0.145378	28.9957	29.4431	29.0328	29.6969			3.6554e-30	23	40.2	5	3	3	4	9.49363	8.77538	8.90037	8.849	9.00805	18.139
TGVEG_238010;TGME49_238010;TGGT1_238010	ribosomal protein RPL23A	N/A	0	-0.160479	31.8425	31.8305	31.5867	31.7654			1.2982e-52	92	53.9	10	11	10	10	10.2339	9.58355	9.71124	9.67538	9.53461	18.561
TGVEG_238040A;TGGT1_238040A;TGME49_238040	protein disulfide-isomerase domain-containing protein	N/A	1	NaN	NaN	NaN	25.8787	NaN			8.7729e-07	4	3.4	1	1	2	1	8.06774	6.95942	NaN	7.93331	7.34268	125.54
TGVEG_238050;TGME49_238050;TGGT1_238050	nuclease and tudor domain-containing protein	N/A	0	-0.130836	30.5232	30.7337	30.6251	30.37			3.0173e-168	85	39.3	19	19	23	17	9.88139	9.14404	9.36568	9.37874	9.17725	104.04
TGVEG_238070;TGME49_238070;TGGT1_238070	glutaredoxin domain-containing protein	N/A	0	-0.196309	28.1105	27.916	27.8342	27.7998			3.4459e-15	15	28.2	3	6	6	4	9.08632	8.33459	8.58427	8.60298	8.34052	26.165
TGVEG_238100;TGME49_238100;TGGT1_238100	transmembrane protein	HMM: MALPRSTQTPRGSTACRLAFFVAFFWASFAG, NN: MALPRSTQTPRGSTACRLAFFVAFFWASFAG;HMM: MALPRSTRTPRGSTACRLAFFVAFFWASFAG, NN: MALPRSTRTPRGSTACRLAFFVAFFWASFAG	2	NaN	NaN	NaN	NaN	26.9753			2.0232e-13	9	19.6	2	2	1	4	8.60977	7.87842	8.05488	7.87508	8.15567	26.92
TGVEG_238180;TGME49_238180;TGGT1_238180	26s proteasome regulatory complex subunit, putative;putative 26s proteasome regulatory complex subunit	N/A	0	0.0154629	25.9386	NaN	25.954	NaN			7.0411e-13	9	14.9	3	2	2	2	8.51012	7.88472	8.09968	7.86427	7.68156	47.55
TGVEG_238250;TGME49_238250;TGGT1_238250	ribosomal protein RPL36	N/A	0	-0.144416	29.9712	29.8433	29.7196	29.806			1.8664e-26	28	40.6	5	5	5	5	9.63651	9.18594	8.95155	8.92433	9.02584	11.407
TGVEG_239100;TGME49_239100;TGGT1_239100	ribosomal protein RPS7	N/A	0	-0.235445	32.4968	32.2936	32.1658	32.1537			2.888e-126	130	74	16	18	18	13	10.3939	9.8231	9.85494	9.79986	9.66689	22.587
TGVEG_239260;TGME49_239260;TGGT1_239260	histone H4	N/A	0	-0.270653	32.6694	32.734	32.3934	32.4687			2.2906e-53	84	53.4	6	6	6	6	10.4783	9.90492	9.9406	9.84728	9.79889	11.439
TGVEG_239310;TGME49_239310;TGGT1_239310	ribulose 5-phosphate isomerase	N/A	0	NaN	NaN	26.5592	NaN	NaN			0.00012737	3	7.3	0	2	1	1	8.55867	NaN	8.08856	8.12054	8.03084	27.513
TGVEG_239330;TGME49_239330;TGGT1_239330	ribosomal protein RPL37	N/A	0	-0.233034	29.1121	28.759	28.8314	28.5736			0.00041625	10	14.3	2	2	2	2	9.35027	8.7674	8.74814	8.82234	8.634	11.221
TGVEG_239490;TGME49_239490;TGGT1_239490	dehydrogenase E1 component family protein	N/A	0	-0.170478	NaN	28.986	28.7791	28.8519			8.8119e-33	17	12.6	3	3	4	3	9.31088	8.32848	8.81596	8.83158	8.69878	63.914
TGVEG_239500;TGME49_239500;TGGT1_239500	proteasome subunit alpha type, putative;putative proteasome subunit alpha type	N/A	0	-0.268531	29.3225	28.8664	28.9321	28.7197			6.3738e-30	27	26.6	4	5	4	5	9.41353	8.8715	8.81089	8.81898	8.73352	27.936
TGVEG_239752;TGME49_239752;TGGT1_239752	hypothetical protein;putative galactosyltransferase	N/A	0	0.110785	26.5993	26.638	26.8126	26.6462			8.9597e-26	11	13	2	4	5	4	8.71766	7.79853	8.10707	8.3206	8.08607	102.14
TGVEG_239760;TGME49_239760;TGGT1_239760	ribosomal protein RPL22	N/A	0	-0.190252	30.9542	30.9857	30.7549	30.8046			1.779e-29	37	39.1	6	6	5	5	9.96437	9.39471	9.39895	9.39559	9.24017	15.073
TGVEG_239820;TGME49_239820;TGGT1_239820	D-3-phosphoglycerate dehydrogenase	N/A	0	-0.0224743	28.9378	29.3395	29.1368	29.0955			9.5937e-46	38	20.7	9	8	7	7	9.44126	8.76623	8.89681	8.85087	8.83286	65.193
TGVEG_239890;TGME49_239890;TGGT1_239890	SCP family extracellular subfamily protein	HMM: MANKAVLALALLLCVASSALVQST, NN: MANKAVLALALLLCVASSALVQST	1	-0.18372	26.7672	26.9822	26.6897	26.6923		+	0.00011585	8	7.3	2	2	2	2	8.73716	8.0693	8.21426	8.17222	8.06524	26.623
TGVEG_240280;TGME49_240280;TGGT1_240280	S1/P1nuclease	HMM: MKRTRSTAAGLVLCLLCGSSLISCAQAF, NN: MKRTRSTAAGLVLCLLCGSSLISCAQAF	1	NaN	27.3439	NaN	NaN	NaN			3.5734e-10	5	8	2	1	1	1	8.6272	8.23134	8.12908	7.75289	7.79429	48.523
TGVEG_240590;TGME49_240590;TGGT1_240590	DNA-directed RNA polymerase II RPB5	N/A	0	NaN	NaN	NaN	NaN	24.5505			3.7823e-10	5	15.6	1	1	2	1	8.05839	7.25993	7.58888	7.4877	7.4257	24.017
TGVEG_240600;TGME49_240600;TGGT1_240600	chaperonin cpn60, putative;putative chaperonin cpn60	N/A	1	-0.0778465	29.8503	29.7515	29.7063	29.7398			1.9798e-69	49	36.1	14	15	11	10	9.63049	9.01995	9.12454	9.01009	8.93853	72.236
TGVEG_240650;TGME49_240650;TGGT1_240650	coatomer protein complex, subunit alpha, putative;putative coatomer protein complex, subunit alpha	N/A	0	0.0827684	28.2725	28.5286	28.4272	28.5394			8.776e-49	33	12.8	9	8	5	7	9.23414	8.56681	8.74284	8.61291	8.58257	142.95
TGVEG_240690;TGME49_240690;TGGT1_240690	S-adenosyl methionine synthetase	N/A	0	-0.313137	28.2826	28.4841	27.9095	28.2309			2.0013e-16	14	16.9	3	3	4	4	9.17438	8.43575	8.63638	8.59466	8.59684	45.894
TGVEG_240810;TGME49_240810;TGGT1_240810	hypothetical protein;putative transporter	N/A	10	-0.0896549	26.5627	26.4603	26.3348	26.5089			1.2019e-06	10	3.5	2	2	2	2	8.63068	8.12788	7.98482	8.0289	7.95212	61.262
TGVEG_240870;TGME49_240870;TGGT1_240870	beta adaptin protein, putative;putative beta adaptin protein	N/A	0	NaN	NaN	26.1543	NaN	NaN			3.0368e-17	6	6.1	2	2	1	1	8.37151	7.89297	7.96666	7.48748	7.52825	101.96
TGVEG_242290;TGME49_242290;TGGT1_242290	proteasome subunit alpha1, putative;putative proteasome subunit alpha1	N/A	0	-0.249848	29.2385	29.1006	28.8327	29.0067			4.6737e-51	23	36.8	5	5	7	4	9.41609	8.87397	8.80479	8.90145	8.62699	28.114
TGVEG_242330;TGME49_242330;TGGT1_242330	ribosomal protein RPS5	N/A	0	-0.338777	31.352	31.0779	30.8362	30.9161			2.6649e-59	58	52.1	10	9	9	9	10.028	9.36297	9.50266	9.43731	9.38771	21.613
TGVEG_242380;TGME49_242380;TGGT1_242380	fatty acid elongase	N/A	7	NaN	NaN	NaN	NaN	24.8201			2.6353e-06	3	5.1	0	1	1	1	8.04305	NaN	7.65426	7.52092	7.50687	39.594
TGVEG_242660;TGME49_242660;TGGT1_242660	putative vacuolar sorting protein 35;vacuolar sorting protein 35, putative	N/A	0	NaN	NaN	26.1658	NaN	NaN			0.00058361	2	2.1	1	2	0	1	8.16811	6.92982	7.97012	NaN	7.6571	95.635
TGVEG_242840;TGME49_242840;TGGT1_242840	membrane protein	N/A	1	NaN	NaN	NaN	24.9351	NaN			1.7832e-08	3	13.4	1	1	1	0	7.79033	7.2334	NaN	7.64925	NaN	13.904
TGVEG_243200;TGME49_243200;TGGT1_243200	hypothetical protein	N/A	0	0.204582	25.1168	25.3068	25.0652	25.7675			9.6193e-13	10	2.6	2	2	2	3	8.29332	7.55979	7.57872	7.67048	7.87768	133.45
TGVEG_243570;TGME49_243570;TGGT1_243570	ribosomal protein RPS26	N/A	0	0.0218639	30.1616	29.6663	29.9358	NaN			8.8415e-08	13	18.8	2	2	2	1	9.66155	9.06032	9.09764	9.15764	8.87419	12.725
TGVEG_243580;TGME49_243580;TGGT1_243580	Hit family protein involved in cell-cycle regulation, putative;putative Hit family protein involved in cell-cycle regulation	HMM: MLPTRCLKFVTLSTAMLSLQTPRLSAF, NN: MLPTRCLKFVTLSTAMLSLQTPRLSAF	0	-0.216843	NaN	27.2524	26.8719	27.1993			1.7958e-20	11	15.9	1	3	2	2	8.7687	7.69623	8.39257	8.17263	8.15128	30.516
TGVEG_243710;TGME49_243710;TGGT1_243710	t-complex protein beta subunit	N/A	0	-0.174717	30.4126	30.4661	30.2166	30.3126			1.7163e-84	72	43.1	11	18	17	15	9.81834	9.02169	9.32703	9.30752	9.139	61.472
TGVEG_243730;TGME49_243730;TGGT1_243730	rhoptry protein ROP9	HMM: MTHPNPLQTRFSRSASLVSRMPLVRLFFTIAAPLLFSPSPCP, NN: MTHPNPLQTRFSRSASLVSRMPLVRLFFTIAAPL;HMM: MTHPNPLQTRFSRSASLVSRMPLVRLFFTIAAPLLFSPSPFPFLPLKTHCLAI, NN: MTHPNPLQTRFSRSASLVSRMPLVRLFFTIAAPL	0;1	0.0286598	32.2822	32.2417	32.3162	32.2651			2.4842e-132	114	62	19	16	17	12	10.3952	9.69962	9.82703	9.91289	9.69353	37.701
TGVEG_243910;TGME49_243910;TGGT1_243910	Cof family hydrolase subfamily protein	N/A	0	NaN	NaN	NaN	24.9823	NaN			1.341e-08	1	4.3	0	0	1	0	7.66345	NaN	NaN	7.66345	NaN	40.649
TGVEG_243920;TGME49_243920;TGGT1_243920	DNA replication licensing factor MCM5, putative;putative DNA replication licensing factor MCM5	N/A	0	NaN	25.9301	NaN	NaN	NaN			0.0017761	2	2.3	2	1	0	0	8.0667	7.80574	7.72151	NaN	NaN	88.211
TGVEG_243930;TGME49_243930;TGGT1_243930	hypothetical protein	HMM: MRQFLPLLVLLPLLQRQDSAA, NN: MRQFLPLLVLLPLLQRQDSAA	0	-0.22234	27.8089	27.9946	27.585	27.7739		+	7.3616e-45	18	8.3	6	4	4	5	9.02951	8.4447	8.4454	8.32582	8.47894	101.35
TGVEG_243950;TGME49_243950;TGGT1_243950	prohibitin, putative;putative prohibitin	HMM: MAERLLTTIGRAGVLLGSAGFVASSCLY, NN: MAERLLTTIGRAGVLLGSAGFVASS	0	0.179411	28.7601	29.736	29.3385	29.5165			4.076e-28	23	35.8	3	8	6	6	9.52969	8.44333	9.08124	9.01263	8.94112	30.221
TGVEG_243960;TGME49_243960;TGGT1_243960	nuclear transport factor 2 (ntf2) domain-containing protein	N/A	0	-0.061265	28.7539	28.7302	28.6479	28.7136			6.7267e-52	29	15.1	7	8	7	7	9.31798	8.62217	8.76709	8.78566	8.66771	84.181
TGVEG_244110;TGME49_244110;TGVEG_244105;TGGT1_244110	hypothetical protein;nucleosome assembly protein (nap) protein	N/A	0;1	-0.148551	30.216	29.9389	30.057	29.8008			2.4159e-98	36	28.6	7	7	7	7	9.71189	8.99901	9.16735	9.20984	9.02617	48.586
TGVEG_244200;TGME49_244200;TGGT1_244200	2-oxoglutarate dehydrogenase e1 component, mitochondrial precursor, putative;putative 2-oxoglutarate dehydrogenase e1 component, mitochondrial precursor	HMM: MRSLRSFSTSRWTRGASLSHPTARRSPSASLSLSSSLLSPVVVSAR, NN: MRSLRSFSTSRWTRGA	0	0.102031	27.4732	27.8704	27.8799	27.6678			1.7193e-43	17	11.7	3	4	7	5	9.03133	8.21945	8.46808	8.58554	8.36201	124.25
TGVEG_244310;TGME49_244310;TGGT1_244310	GTP-binding protein	N/A	0	-0.254038	26.2929	26.5842	26.2175	26.1515			3.7767e-09	12	12.3	2	4	4	2	8.61577	7.71554	8.21368	8.176	7.67542	40.835
TGVEG_244370;TGME49_244370;TGGT1_244370	putative TDC1;TDC1, putative	HMM: MRFPSLIPSLPGSCIPLLAWKHSAFWISGTPGFLFSVSECLLCAEAHSA, NN: MRFPSLIPSLPGSCIPLLAWKHSAFWISGTPGFLFSV	7	NaN	NaN	NaN	NaN	25.9559			6.756e-08	5	3.8	1	1	1	2	8.23654	7.81608	7.26923	7.24888	7.84878	64.317
TGVEG_244440;TGME49_244440;TGGT1_244440	nucleoside transporter protein	N/A	10	NaN	NaN	25.8444	NaN	NaN			0.0016338	0	3.9	0	1	0	1	8.17254	NaN	7.87338	NaN	7.86966	50.966
TGVEG_244460;TGME49_244460;TGGT1_244460	hypothetical protein	N/A	0	NaN	NaN	NaN	23.7048	NaN			0.0042805	1	0.9	0	0	1	0	7.27887	NaN	NaN	7.27887	NaN	127.2
TGVEG_244560;TGME49_244560;TGGT1_244560	heat shock protein 90, putative;putative heat shock protein 90	HMM: MSPAGRRTPKKLAFAALLLGVSVACTSSFFSASVAPSALWVAAT, NN: MSPAGRRTPKKLAFAALLLGVSVAC;HMM: MSPAGRRTPKKLAFAALLLGVSVACTSSFFSASVSPSALWVAAT, NN: MSPAGRRTPKKLAFAALLLGVSVAC	1	-0.0506401	33.6625	33.657	33.5709	33.6473			0	324	56.8	41	46	46	45	10.8032	10.1217	10.2403	10.2717	10.1538	96.792
TGVEG_244590;TGME49_244590;TGGT1_244590	katanin-like family protein	N/A	0	NaN	NaN	NaN	NaN	24.9855			0.007085	2	2.2	0	0	1	1	7.89497	NaN	NaN	7.62827	7.55668	60.294
TGVEG_244690;TGME49_244690;TGGT1_244690	hypothetical protein	N/A	0	NaN	NaN	NaN	25.2791	NaN			0.00024046	1	1.9	0	0	1	0	7.7528	NaN	NaN	7.7528	NaN	64.984
TGVEG_245450;TGME49_245450;TGGT1_245450	hypothetical protein	N/A	0	NaN	NaN	NaN	NaN	25.4287			1.1237e-06	4	9	1	1	1	1	8.66183	8.04992	8.14996	8.19485	7.69007	15.379
TGVEG_245460;TGME49_245460;TGGT1_245460	ribosomal protein RPS8	N/A	0	-0.0796556	31.9433	32.1929	32.0311	31.9457			1.8363e-70	106	58.5	13	12	12	11	10.3284	9.64069	9.77093	9.79566	9.6796	23.561
TGVEG_245470;TGME49_245470;TGGT1_245470	mitotic checkpoint protein, BUB3 family protein	N/A	0	NaN	NaN	24.5186	NaN	NaN			1.5237e-11	3	15.4	2	1	1	0	8.37053	8.11123	7.47426	7.87923	NaN	36.574
TGVEG_245490;TGME49_245490;TGGT1_245490	microneme protein MIC8	HMM: MKANRIWCFFAWRMVVRAS, NN: MKANRIWCFFAWRMVVRAS	1	NaN	25.3035	NaN	NaN	NaN			1.9982e-08	1	2.3	1	0	0	0	7.61712	7.61712	NaN	NaN	NaN	74.647
TGVEG_245620;TGME49_245620;TGGT1_245620	ribosomal-ubiquitin protein RPS27A	N/A	0	-0.0118561	28.4346	28.1997	28.1072	28.5034			6.422e-08	16	14.3	2	2	2	2	9.21376	8.76473	8.56638	8.59095	8.47095	17.321
TGVEG_245670;TGME49_245670;TGGT1_245670	pyruvate dehydrogenase complex subunit PDH-E1Alpha	N/A	0	NaN	NaN	NaN	26.9629	NaN			5.5545e-14	8	11.2	2	4	2	1	8.69834	7.95188	8.21651	8.25967	7.80152	67.44
TGVEG_245680;TGME49_245680;TGGT1_245680	ribosomal protein RPL21	N/A	0	-0.172795	31.2833	31.0467	31.1084	30.8761			3.0097e-79	66	44.6	10	10	10	10	10.0355	9.42609	9.47767	9.49949	9.30597	17.894
TGVEG_246100;TGME49_246100;TGGT1_246100	phosducin, putative;putative phosducin	N/A	0	NaN	23.0565	NaN	NaN	NaN			5.0593e-07	3	11.9	1	2	1	0	8.25457	6.94071	8.0677	7.73333	NaN	36.272
TGVEG_246130;TGME49_246130;TGGT1_246130	serpin (serine proteinase inhibitor) superfamily protein	N/A	0	-0.12746	29.8361	30.0607	29.7441	29.8978			2.7513e-70	46	38.7	8	11	10	10	9.67446	8.91107	9.1756	9.12375	9.03451	47.407
TGVEG_246330;TGME49_246330;TGGT1_246330	CRAL/TRIO domain-containing protein	N/A	0	NaN	NaN	NaN	24.7601	NaN			2.0793e-08	2	5.3	0	0	1	1	7.83544	NaN	NaN	7.59656	7.46186	48.773
TGVEG_246540;TGME49_246540;TGGT1_246540	cytochrome c1, heme protein	N/A	1	0.201006	28.245	28.5817	28.6696	28.5591			1.2789e-34	20	17.6	4	3	4	5	9.25049	8.63052	8.56914	8.64551	8.73269	45.968
TGVEG_246550;TGME49_246550;TGGT1_246550	aspartyl protease ASP3	HMM: MEGRTTAGRATPAGFWLFSCCLASLLWSANAL, NN: MEGRTTAGRATPAGFWLFSCCLASLLWSANAL;HMM: MEGRTTAGRATPAGFWLFSCCLASVLWSANAL, NN: MEGRTTAGRATPAGFWLFSCCLASVLWSANAL	1	NaN	NaN	NaN	NaN	24.9571			3.9264e-06	2	4.5	0	1	0	2	7.74406	NaN	7.30415	NaN	7.54811	69.155
TGVEG_246920;TGME49_246920;TGGT1_246920	glutathione reductase	HMM: MAAKMAAATRRHFDLFVIGGGSGGLACAR, NN: MAAKMAAATRRHFDLFVIGGGSGGL	0	NaN	25.5544	NaN	NaN	NaN			2.5553e-06	1	7.2	1	0	0	1	7.78654	7.69263	NaN	NaN	7.07536	52.594
TGVEG_247020;TGME49_247020;TGGT1_247020	high mobility group protein b1, putative;putative high mobility group protein b1	N/A	0	NaN	NaN	24.3514	NaN	NaN			0.00041073	1	6.9	0	1	0	0	7.42393	NaN	7.42393	NaN	NaN	28.518
TGVEG_247195;TGME49_247195;TGGT1_247195	microneme protein MIC15	HMM: MGVLRVRSFPLQQRTMVFRATREPFRLPLVAAFIALFLLKGVTCQ, NN: MGVLRVRSFPLQQRTMVFRATREPFRLPLVAAFIALFLLKGVTCQ;HMM: MGVLRVRSFPLQQRTMVFRATREPFRLPLVPAFIALFLLKGVTCQ, NN: MGVLRVRSFPLQQRTMVFRATREPFRLPLVPAFIALFLLKGVTCQ	1	NaN	NaN	22.3566	NaN	NaN			0.0053571	1	0.3	0	1	0	0	6.82344	NaN	6.82344	NaN	NaN	319.96
TGVEG_247350;TGME49_247350;TGGT1_247350	thioredoxin domain-containing protein	HMM: MPQAKTPTAVLSLANVFFSTFIAVSGD, NN: MPQAKTPTAVLSLANVFFSTFIAVSGD	4	-0.221322	30.4699	30.1456	30.3706	29.8023		+	6.052e-28	24	20.8	4	4	3	3	9.7831	9.1788	9.24961	9.26359	8.97674	33.676
TGVEG_247410;TGME49_247410;TGGT1_247410	hypothetical protein;putative transmembrane protein	N/A	1	NaN	NaN	NaN	26.7349	NaN			0.0015735	2	7.1	1	0	1	0	8.36455	7.88227	NaN	8.19103	NaN	13.855
TGVEG_247460;TGME49_247460;TGGT1_247460	proliferating cell nuclear antigen PCNA1	N/A	0	-0.208378	28.9636	28.1888	28.4385	28.2971			4.7287e-20	20	31.5	6	6	3	4	9.24005	8.76779	8.71234	8.50951	8.49596	34.551
TGVEG_247470;TGME49_247470;TGGT1_247470	nucleolar protein, putative;putative nucleolar protein	N/A	0	-0.0499611	29.1542	29.0712	29.0343	29.0912			1.0641e-60	34	29.5	11	8	9	6	9.43495	8.83518	8.88598	8.89503	8.68467	59.939
TGVEG_247510;TGME49_247510;TGGT1_247510	fructose-bisphospatase II	N/A	0	-0.0942669	30.9188	31.2031	30.9587	30.9747			3.1734e-70	65	37.3	9	8	10	9	10.0153	9.30816	9.4486	9.51824	9.3462	42.397
TGVEG_247550;TGME49_247550;TGGT1_247550	heat shock protein HSP60	N/A	0	-0.0790997	31.7163	31.6684	31.5853	31.6412			5.2713e-168	113	54.8	19	23	22	19	10.2106	9.52965	9.65421	9.69525	9.52975	60.913
TGVEG_247770;TGME49_247770;TGGT1_247770	hypothetical protein;putative transmembrane protein	N/A	1	-0.0338202	28.3057	28.4488	28.5811	28.1057			2.0215e-21	20	41.3	3	4	3	3	9.22066	8.46932	8.7805	8.6808	8.45442	19.264
TGVEG_247930;TGME49_247930;TGGT1_247930	SNARE domain-containing protein	N/A	1	NaN	NaN	NaN	22.8608	NaN			5.8452e-06	0	4.3	0	1	1	0	7.37227	NaN	7.11314	7.02481	NaN	36.304
TGVEG_248340;TGME49_248340;TGGT1_248340	GTP-binding nuclear protein ran/tc4	N/A	0	-0.0411186	32.7779	32.825	32.7044	32.8163			1.1166e-70	131	55.5	12	14	13	13	10.5466	9.79556	10.0023	10.0076	9.941	25.997
TGVEG_248390;TGME49_248390;TGGT1_248390	ribosomal protein RPL26	N/A	0	-0.236732	31.0789	31.1761	30.9659	30.8157			3.3915e-39	48	51.1	11	9	9	7	10.0123	9.42865	9.44181	9.46541	9.28278	16.309
TGVEG_248480;TGME49_248480;TGGT1_248480	ribosomal protein RPS9	N/A	0	-0.168894	32.677	32.7678	32.55	32.557			3.6435e-69	101	52.1	12	12	11	12	10.5045	9.85546	9.9695	9.94458	9.82348	21.684
TGVEG_248700;TGME49_248700;TGGT1_248700	alveolin domain containing intermediate filament IMC12	N/A	0	-0.157511	29.4212	29.731	29.5528	29.2843			8.4076e-21	23	21.7	3	4	4	4	9.55906	8.90396	9.15293	8.96566	8.67696	29.762
TGVEG_248740;TGME49_248740;TGGT1_248740	hypothetical protein	N/A	0	-0.18782	NaN	26.3421	26.0737	26.2349			1.139e-11	8	3.2	1	2	3	2	8.49486	7.26188	7.9622	8.10867	7.87004	135.01
TGVEG_248810;TGME49_248810;TGGT1_248810	nuclear factor NF7	N/A	0	-0.0170927	29.5159	29.7709	29.5285	29.7242			1.275e-74	39	33.2	9	10	11	9	9.59629	8.92715	9.00514	9.07943	8.9489	54.305
TGVEG_248880;TGME49_248880;TGGT1_248880	GTPase RAB7	N/A	0	0.00967789	27.1608	NaN	27.1705	NaN			5.617e-48	8	20.6	2	2	3	1	8.85744	8.13941	8.40092	8.35585	8.01578	47.712
TGVEG_249180;TGME49_249180;TGGT1_249180	bifunctional dihydrofolate reductase-thymidylate synthase	N/A	0	-0.139717	30.0342	30.099	29.9824	29.8714			2.3578e-77	60	35.6	11	13	13	13	9.70931	8.91364	9.23767	9.16008	9.05177	68.751
TGVEG_249250;TGME49_249250;TGGT1_249250	ribosomal protein RPL35A	N/A	0	-0.0453434	29.0387	29.023	28.9551	29.0159			2.0359e-15	17	47.3	4	3	2	3	9.40199	8.7969	8.86491	8.80922	8.71579	12.847
TGVEG_249270;TGME49_249270;TGGT1_249270	protein disulfide isomerase-related protein (provisional), putative;putative protein disulfide isomerase-related protein (provisional)	HMM: MAFTGARMRRGAPLSSLLCLAPGCTYTG, NN: MAFTGARMRRGAPLSSLLCLAPGCTYTG	0	-0.0446796	30.9794	31.1878	31.0137	31.0641			2.1203e-85	68	34	13	13	11	13	10.0229	9.36769	9.45246	9.47022	9.38444	59.94
TGVEG_249390;TGME49_249390;TGGT1_249390	glutamate/leucine/phenylalanine/valine dehydrogenase family protein	HMM: MVHVSASLPFSFFPRFFLSQPRGTRSF, NN: MVHVSASLPFSFFPRFFLSQPRGTRSF;HMM: MVHVSASLPFSFFPRLFLSQPRGTRSI, NN: MVHVSASLPFSFFPRLFLSQPRGTRSI	0	-0.204296	31.5842	31.4541	31.3553	31.2745			6.3694e-206	136	38.6	30	29	30	25	10.1316	9.52789	9.57475	9.60017	9.38553	135.7
TGVEG_249530;TGME49_249530;TGGT1_249530	exportin 1, putative;putative exportin 1	N/A	0	0.124244	27.9576	28.2936	27.962	28.5377			6.9832e-49	20	9	5	5	4	5	9.15625	8.49124	8.53709	8.5048	8.66174	129.09
TGVEG_249590;TGME49_249590;TGGT1_249590	proteasome subunit alpha type 5-2, putative;putative proteasome subunit alpha type 5-2	N/A	0	-0.222897	29.0609	29.0167	28.7847	28.8471			7.481e-26	19	32.6	5	5	6	3	9.38819	8.7644	8.84194	8.92486	8.51475	28.279
TGVEG_249610;TGME49_249610;TGGT1_249610	hypothetical protein;putative nuclear cap-binding protein	N/A	0	NaN	NaN	24.9007	NaN	NaN			0.00048219	3	1.9	0	2	0	1	7.71951	NaN	7.5893	NaN	7.13287	135.97
TGVEG_249780;TGME49_249780;TGGT1_249780	hypothetical protein	N/A	0	-0.206588	29.475	29.245	29.2161	29.0907			1.6544e-86	33	35.4	7	7	7	7	9.48746	8.82359	8.93879	9.00817	8.71478	35.574
TGVEG_249850;TGME49_249850;TGGT1_249850	GAP40 protein	N/A	9	-0.145571	29.7353	29.8582	29.579	29.7234			4.1374e-18	24	17.7	4	3	4	3	9.63744	8.98801	9.06959	9.07284	9.00445	43.081
TGVEG_249900;TGME49_249900;TGGT1_249900	adenine nucleotide translocator, putative;putative adenine nucleotide translocator	N/A	4	0.0402203	32.3429	32.3131	32.2983	32.4382			4.9489e-152	140	70.8	18	16	20	17	10.4207	9.77967	9.82354	9.85892	9.80861	35.255
TGVEG_249990;TGME49_249990;TGGT1_249990	hypothetical protein;putative microtubule-binding protein	N/A	0	-0.0427713	29.3972	29.3133	29.2673	29.3577			2.2944e-74	39	20.5	9	11	10	7	9.51088	8.83482	8.9683	9.04999	8.70526	92.585
TGVEG_250710;TGME49_250710;TGGT1_250710	microneme protein MIC10	HMM: MALSSLNNIRPFSGLLGCGLLFGALVVVVACVFSV, NN: MALSSLNNIRPFSGLLGCGLLFGALVVVVACVFSVPVEAG	1	-0.713839	NaN	27.7175	NaN	27.0037			1.6924e-21	7	19.2	1	4	0	2	8.6797	7.73207	8.49328	NaN	8.05296	23.113
TGVEG_250770;TGME49_250770;TGGT1_250770	eukaryotic initiation factor-4A, putative;putative eukaryotic initiation factor-4A	N/A	0	-0.123997	33.6951	33.852	33.668	33.6311			4.2359e-231	212	57	24	23	23	24	10.8377	10.142	10.3019	10.3098	10.1616	46.673
TGVEG_250810;TGME49_250810;TGGT1_250810	ribosomal protein RPL35	N/A	1	-0.194121	29.604	29.5737	29.3372	29.4522			3.9898e-09	18	17.4	3	3	3	2	9.55031	8.94345	8.99382	8.99555	8.84331	20.069
TGVEG_250830;TGME49_250830;TGGT1_250830	SAC3/GANP family protein	N/A	0	NaN	NaN	26.2996	NaN	NaN			1.3063e-21	7	18.4	1	2	1	3	8.63103	7.81898	8.01043	7.9639	8.22331	41.072
TGVEG_250880;TGME49_250880;TGGT1_250880	kinase, pfkB family protein	N/A	0	NaN	NaN	NaN	27.084	26.8			2.403e-39	8	15.9	1	1	3	3	8.61014	7.72092	7.51395	8.27349	8.12892	49.957
TGVEG_251500;TGME49_251500;TGGT1_251500	eukaryotic initiation factor-3, subunit 3, putative;putative eukaryotic initiation factor-3, subunit 3	HMM: MVESDEETRGAPKCFSSVLAHIGLLSLSRLAVFSLLVLAASRLLLLALSR, NN: MVESDEETRGAPKCFSSVLAHIGLLSLSRLAVFSLLVLAA	0	-0.110012	30.2315	30.3275	30.0906	30.2484			3.6316e-96	77	29	13	14	13	14	9.76976	9.09892	9.21408	9.18207	9.16773	65.713
TGVEG_251680;TGME49_251680;TGGT1_251680	histamine-releasing factor, putative;putative histamine-releasing factor	N/A	0	-0.102395	30.8209	30.8852	30.6768	30.8245			4.2694e-16	37	28.7	5	7	6	7	9.95424	9.24529	9.46162	9.32793	9.34602	19.172
TGVEG_251760;TGME49_251760;TGGT1_251760	putative subunit of proteaseome activator complex;subunit of proteaseome activator complex, putative	N/A	0	NaN	24.6001	NaN	NaN	NaN			2.5225e-15	3	16.7	2	1	0	0	7.60275	7.40536	7.16533	NaN	NaN	30.711
TGVEG_251780;TGME49_251780;TGGT1_251780	heat shock protein	HMM: MASMAAGASLAYRASYCSGA, NN: MASMAAGASLAYRASYCSGA	0	0.0684366	31.0948	31.3699	31.2608	31.3408			1.3107e-158	108	45.1	22	17	23	19	10.0944	9.42828	9.48537	9.56512	9.4795	78.25
TGVEG_251810;TGME49_251810;TGGT1_251810	putative translation initiation factor eIF-5A;translation initiation factor eIF-5A, putative	N/A	0	-0.167683	32.174	32.3363	32.1674	32.0075			1.0146e-108	72	60.2	9	8	9	8	10.3654	9.77323	9.82537	9.79194	9.64153	17.468
TGVEG_251870;TGME49_251870;TGGT1_251870;TGVEG_305160;TGME49_305160;TGGT1_305160	histone H2Ba;histone H2Bb	N/A	0	-0.186138	33.3302	33.2921	33.1282	33.1218			8.0936e-61	78	62.6	8	9	8	9	10.6783	10.088	10.1049	10.0798	10.0287	12.575
TGVEG_251880;TGME49_251880;TGGT1_251880	tRNA synthetases class I family protein	HMM: MRLRTPSFLLSDLSSLLPLPFRTASTVASS, NN: MRLRTPSFLLSDLSSLLPLPFRTAS;HMM: MRLRTPSSLLSDLSSLLPLPFRTASTVASS, NN: MRLRTPSSLLSDLSSLLPLPFRTAS	0	0.564336	26.7071	27.1189	27.4554	27.4994			8.6987e-28	11	11.5	3	3	3	3	8.87495	8.16705	8.22585	8.42779	8.22243	60.169
TGVEG_251930;TGME49_251930;TGGT1_251930	enoyl-acyl carrier reductase ENR	HMM: MVGFKLLTLGAFVAGELTLVGPAGTMAF, NN: MVGFKLLTLGAFVAGELTLVGPAGTMAF	0	NaN	NaN	NaN	25.6976	NaN			2.0866e-06	4	5.3	1	1	1	1	8.37727	NaN	7.95053	7.87879	7.8663	43.658
TGVEG_252220;TGME49_252220;TGGT1_252220	tetratricopeptide repeat domain containing protein	N/A	0	-0.0921898	27.6836	27.5935	27.5701	27.5227			5.5772e-22	15	14.2	4	4	5	4	8.9804	8.29829	8.37081	8.46782	8.35913	63.372
TGVEG_252290;TGME49_252290;TGGT1_252290	importin alpha, putative;putative importin alpha	N/A	0	-0.215529	29.406	29.2322	29.1632	29.0439			2.0791e-51	32	18.9	8	6	9	6	9.47583	8.74441	8.87506	9.03145	8.78591	59.36
TGVEG_252360;TGGT1_252360;TGME49_252360	rhoptry kinase family protein ROP24 (incomplete catalytic triad)	HMM: MATRSFLFVFLALSSLGGLCSE, NN: MATRSFLFVFLALSSLGGLCSE	0	-0.0359268	28.2699	28.2809	28.2157	28.2632			5.8486e-26	23	15.5	6	4	5	5	9.17351	8.58382	8.6025	8.56726	8.52888	60.887
TGVEG_252630;TGME49_252630;TGGT1_252630	hypothetical protein	N/A	0	-0.288753	27.3496	NaN	27.0544	27.0672			1.2963e-07	7	15.4	2	1	2	2	8.78957	8.23363	7.99453	8.28691	8.18293	15.051
TGVEG_253290;TGGT1_253290;TGME49_253290	valyl-tRNA synthetase	N/A	0	-0.0231276	29.2018	29.4966	29.3573	29.2948			4.5402e-83	49	20.3	14	13	8	8	9.50679	8.8596	9.08976	8.88281	8.69485	124.91
TGVEG_253430;TGME49_253430;TGGT1_253430	asparagine synthetase, putative;putative asparagine synthetase	N/A	0	-0.286294	31.6849	31.4532	31.2969	31.2687			9.5288e-83	96	39.8	17	17	17	14	10.1412	9.47563	9.66297	9.5345	9.45117	65.868
TGVEG_253730;TGME49_253730;TGGT1_253730	importin-beta N-terminal domain-containing protein	HMM: MSAAPAAGGAPGDLQALAAQLPLASLLEETLAA, NN: MSAAPAAGGAPGDLQALAAQLPLASLLEETLAA	0	-0.474476	26.6694	26.2609	NaN	25.9907			2.1077e-06	7	2.4	2	2	1	3	8.51967	7.93556	7.98657	7.70528	7.98668	115.14
TGVEG_253820;TGME49_253820;TGGT1_253820	hypothetical protein	N/A	0	-0.347149	29.0439	28.7423	28.7727	28.3192			4.7376e-53	29	69.9	10	7	6	4	9.31917	8.83703	8.80856	8.71783	8.36631	25.221
TGVEG_253880;TGGT1_253880;TGME49_253880	GNS1/SUR4 family protein	HMM: MWSLWQLFHFYCLRPTGGADLARVLQVPIFVACALYVPVVYGL, NN: MWSLWQLFHFYCLRPTGGADLARVLQVPIFVACALYVPVVYGL	9	NaN	NaN	NaN	25.7118	NaN			2.092e-11	5	5	1	1	2	1	8.23172	7.47806	7.48295	7.88305	7.52679	78.115
TGVEG_254000;TGME49_254000;TGGT1_254000	hypothetical protein	HMM: MKVVSVHASHPSASGLRGLASLPRSRAFCVVMARPASRPSRPSTASVGRRLSGSFLLVALALAC, NN: MKVVSVHASHPSASGLRGLASLPRSRAF;N/A	0	NaN	NaN	23.8608	NaN	NaN			3.3249e-05	4	4.8	1	1	0	2	7.52213	7.15791	7.27625	NaN	NaN	51.153
TGVEG_254365;TGME49_254365;TGGT1_254365	phosphatidate cytidylyltransferase	N/A	4	NaN	NaN	NaN	NaN	24.3006			0.0066295	2	5.1	0	1	0	1	7.63005	NaN	7.30643	NaN	7.35048	27.5
TGVEG_254390;TGGT1_254390;TGME49_254390	CRAL/TRIO domain-containing protein	N/A	0	NaN	NaN	NaN	NaN	25.6999			1.6939e-09	1	4.5	1	0	0	2	7.99852	7.60793	NaN	NaN	7.77171	76.122
TGVEG_254440;TGME49_254440;TGGT1_254440	ribosomal protein RPL12	N/A	0	-0.127875	30.1586	30.2443	30.2349	29.9123			3.9867e-25	22	30.3	3	2	3	2	9.74998	9.11554	9.16596	9.26458	9.00604	17.821
TGVEG_254470;TGME49_254470;TGGT1_254470	hypothetical protein;putative transmembrane protein	N/A	1;2	-0.419024	28.3116	28.1064	27.8707	27.7093			4.2785e-60	13	18.2	6	5	6	4	9.1085	8.48707	8.60274	8.56439	8.32114	80.48
TGVEG_254480;TGME49_254480;TGGT1_254480	WD domain, G-beta repeat-containing protein	N/A	0	NaN	NaN	NaN	24.1619	NaN			6.3768e-05	2	2.2	0	1	1	0	7.53997	NaN	6.93351	7.41647	NaN	86.779
TGVEG_254520;TGME49_254520;TGGT1_254520	mediator complex subunit MED11	N/A	0	NaN	26.9329	NaN	NaN	NaN			7.7428e-10	6	15	2	1	1	1	8.35662	8.10762	7.54659	7.54182	7.46483	16.381
TGVEG_254620;TGME49_254620;TGGT1_254620	ribosomal protein RPL39	N/A	0	NaN	NaN	27.3057	NaN	NaN			2.0471e-06	12	14.7	1	1	1	1	8.53845	7.62131	8.31328	7.76103	7.60511	8.2748
TGVEG_254690;TGGT1_254690;TGME49_254690	phospholipase/carboxylesterase	N/A	1	NaN	NaN	NaN	24.7562	NaN			5.0233e-13	5	7.8	2	1	1	2	8.00617	7.29859	7.52005	7.5954	6.95592	54.217
TGVEG_254720;TGGT1_254720	dense granule protein GRA8	HMM: MALPLRVSATVFVVFAVFGVARAM, NN: MALPLRVSATVFVVFAVFGVARAM;N/A	0	0.034153	30.7274	30.8695	30.7696	30.8957			3.6938e-34	83	30.3	7	6	7	6	9.9579	9.32968	9.35883	9.40917	9.32004	26.123
TGVEG_254870;TGME49_254870;TGGT1_254870	hypothetical protein	N/A	0	NaN	NaN	NaN	NaN	24.506			0.00057112	3	2.8	0	1	1	1	7.84014	NaN	7.35752	7.31357	7.41231	47.045
TGVEG_254880;TGME49_254880;TGGT1_254880	Alpha-galactosidase	HMM: MLVIRAGSCPGSSGRIARFGGYRKCVFVLGLVGLSTSSLLAL, NN: MLVIRAGSCPGSSGRIARFGGYRKCVFVLGLVGLSTSSLL	2	NaN	NaN	26.3366	NaN	NaN			1.0168e-08	6	5.1	1	4	1	1	8.2824	7.26576	8.02156	7.50161	7.56024	81.828
TGVEG_254900;TGME49_254900;TGGT1_254900	proteasome subunit beta type 2, putative;putative proteasome subunit beta type 2	N/A	0	-0.137236	28.9916	29.0738	28.8507	28.9402			4.1313e-25	24	44.5	7	5	4	4	9.37663	8.84918	8.81973	8.57114	8.80677	22.001
TGVEG_255190;TGME49_255190;TGGT1_255190	myosin C	N/A	0	NaN	NaN	NaN	25.1854	NaN			1.2165e-09	5	4	2	2	2	0	8.10332	7.54275	7.59027	7.72458	NaN	132.66
TGVEG_255420;TGME49_255420;TGGT1_255420	hypothetical protein	N/A	0	0.931485	27.3498	NaN	28.3727	28.1898			4.9019e-17	15	27.3	4	3	4	5	9.03647	8.33207	8.11747	8.56221	8.57613	30.213
TGVEG_255660;TGME49_255660;TGGT1_255660	EF hand domain-containing protein	HMM: MQVSPGALCRSAVFLFPLLSLFCRASSFAR, NN: MQVSPGALCRSAVFLFPLLSLFCRASSF;HMM: MQVSPGALCRSAVFLFPLLSLFCRASSFARLASPLAVEAA, NN: MQVSPGALCRSAVFLFPLLSLFCRASSF	0	NaN	NaN	24.9828	NaN	NaN			0.0026195	1	10.7	0	1	0	0	7.614	NaN	7.614	NaN	NaN	16.143
TGVEG_255900;TGME49_255900;TGGT1_255900	Bax inhibitor-1, putative;putative Bax inhibitor-1	N/A	6	NaN	NaN	NaN	25.7379	NaN			2.0667e-09	3	11.3	0	0	2	1	8.01982	NaN	NaN	7.89091	7.42951	27.78
TGVEG_256000;TGME49_256000;TGGT1_256000	endoplasmic reticulum retention receptor	HMM: MAMNAFRFAGDMLHLLSIVLLLLKLRRSK, NN: MAMNAFRFAGDMLHLLSIVLLLLKLRRSKNCV	4	NaN	NaN	NaN	26.7428	NaN			6.1838e-08	6	11.7	1	1	2	1	8.74118	8.27416	7.96714	8.1934	8.05778	26.148
TGVEG_256050;TGME49_256050;TGGT1_256050	signal recognition particle 14kd protein	N/A	0	NaN	NaN	NaN	24.748	NaN			2.7549e-07	2	8.1	0	1	1	0	7.82697	NaN	7.44674	7.5929	NaN	18.964
TGVEG_256760;TGME49_256760;TGGT1_256760	pyruvate kinase PyK1	N/A	0	-0.112942	32.3264	32.2756	32.2402	32.1358			1.5995e-152	134	51	19	21	22	21	10.3826	9.72521	9.83354	9.83603	9.71172	57.529
TGVEG_256770;TGME49_256770;TGGT1_256770	eukaryotic translation initiation factor 4A, isoform 3, putative;putative eukaryotic translation initiation factor 4A, isoform 3	N/A	0	0.351523	27.5765	27.6584	28.1342	27.8037			9.912e-48	14	31.9	5	5	5	3	9.04794	8.37727	8.59221	8.4866	8.25691	45.126
TGVEG_256840;TGME49_256840;TGGT1_256840	hypothetical protein	N/A	0	NaN	NaN	NaN	NaN	24.5356			2.1228e-17	3	3	0	0	1	2	7.42121	NaN	NaN	NaN	7.42121	82.787
TGVEG_256980;TGME49_256980;TGGT1_256980	glycerol-3-phosphate-acyltransferase	HMM: MYFLVRWLCIGIVRSF, NN: MYFLVRWLCIGIVRSF	4	NaN	NaN	NaN	NaN	25.2692			1.8269e-08	1	3.4	0	1	0	2	7.75096	NaN	7.09691	NaN	7.64205	110.28
TGVEG_256990;TGGT1_256990;TGME49_256990	glycyl-tRNA synthetase	N/A	0	-0.0500212	30.1193	30.267	30.0957	30.1905			1.9603e-79	79	30.7	16	17	17	14	9.75658	9.06517	9.21598	9.21651	9.09923	86.339
TGVEG_257040;TGME49_257040;TGGT1_257040	TB2/DP1, HVA22 family protein	N/A	2	NaN	NaN	NaN	27.5393	NaN			4.2323e-06	6	14.7	1	1	2	1	8.79816	8.01778	8.12005	8.43318	8.08329	24.051
TGVEG_257060;TGME49_257060;TGGT1_257060	translation initiation factor sui1 protein	N/A	0	NaN	NaN	NaN	NaN	24.6349			0.00047001	4	5	1	1	1	1	7.92779	7.12727	7.29839	7.36438	7.45111	30.292
TGVEG_257090;TGME49_257090	NAC domain-containing protein	N/A	0	-0.161156	31.2705	31.1808	31.0698	31.0592			4.5496e-104	69	36.5	8	8	8	8	10.0632	9.38265	9.50912	9.50866	9.43112	38.782
TGVEG_257350;TGME49_257350;TGGT1_257350	eukaryotic translation initiation factor, putative;putative eukaryotic translation initiation factor	N/A	0	-0.197514	27.514	27.5088	27.3036	27.3242			1.537e-22	19	11	5	5	5	5	8.9194	8.34106	8.37634	8.28574	8.25616	89.775
TGVEG_257530;TGME49_257530;TGGT1_257530	transporter, major facilitator family protein	N/A	12	-0.0736704	28.0087	NaN	27.7804	28.0895			5.8899e-21	8	6.5	2	1	2	2	8.98852	8.46564	7.89494	8.48678	8.47202	54.6
TGVEG_257680;TGME49_257680;TGGT1_257680	myosin light chain MLC1	N/A	0	-0.300091	30.3726	30.7334	30.3035	30.2024		+	8.6491e-37	41	31.5	5	5	6	5	9.85256	9.11501	9.3958	9.31404	9.10367	24.124
TGVEG_257740;TGME49_257740;TGGT1_257740	UMP-CMP kinase	N/A	0	NaN	27.7439	NaN	NaN	NaN			3.9182e-13	6	10.8	3	2	3	2	8.82249	8.35174	8.15585	8.27388	8.03611	50.995
TGVEG_257990;TGME49_257990;TGGT1_257990	heat shock protein 101, putative;putative heat shock protein 101	N/A	0	0.426207	26.6976	27.7182	27.8461	27.4221			7.5353e-35	19	16.9	3	7	8	5	8.97304	7.63962	8.50122	8.60993	8.23497	104.3
TGVEG_258060;TGME49_258060;TGGT1_258060	myosin heavy chain, putative;putative myosin heavy chain	HMM: MTALPPPPSANVAVSFTAAPAE, NN: MTALPPPPSANVAVSFTAAPAEPLSRGEVKAA	0	-0.0200291	NaN	26.4332	26.316	26.5104			1.1979e-15	10	20.2	2	3	2	3	8.59875	7.84294	8.10387	7.93257	8.05941	23.352
TGVEG_258130;TGME49_258130;TGGT1_258130	Rab1 protein	N/A	0	NaN	NaN	NaN	27.6237	NaN			5.8572e-06	4	12	0	1	2	1	8.83861	NaN	8.41101	8.45861	8.15987	23.872
TGVEG_258150;TGME49_258150;TGGT1_258150	proteasome subunit alpha type 7, putative;proteasome subunit alpha type, putative;putative proteasome subunit alpha type 7	N/A	0	-0.0215397	29.1812	29.1887	29.11	29.2168			1.7438e-43	24	30.6	5	7	6	5	9.46452	8.6878	8.98004	8.97343	8.72523	27.081
TGVEG_258210;TGME49_258210;TGGT1_258210	DNA-directed RNA polymerase II RPB2	N/A	0	NaN	NaN	24.5537	NaN	NaN			2.7725e-05	3	1.7	0	2	1	0	7.65461	NaN	7.48484	7.16456	NaN	140.95
TGVEG_258410;TGME49_258410;TGGT1_258410	photosensitized INA-labeled protein PHIL1	N/A	0	-0.377258	28.9641	29.1326	28.6354	28.7068			1.3554e-40	21	39.4	4	5	4	4	9.35712	8.75581	8.91869	8.59353	8.68513	18.844
TGVEG_258458;TGME49_258458;TGGT1_258458	hypothetical protein;putative transmembrane protein	HMM: MHARFRNSKRLSQQLVVLLLLCSIFTGFFLNYEGFAL, NN: MHARFRNSKRLSQQLVVLLLLCSIFTGF;HMM: MRARFRNSKRPSQQLVVLLLLCSIFTGFFLNYEGFAL, NN: MRARFRNSKRPSQQLVVLLLLCSIFTGFFL	1	NaN	NaN	NaN	27.0039	26.8304			9.0916e-11	6	19.2	0	1	3	3	8.55006	NaN	7.61527	8.2405	8.14501	28.875
TGVEG_258462;TGME49_258462;TGGT1_258462	hypothetical protein;putative transmembrane protein	N/A	2	NaN	NaN	NaN	NaN	23.5563			0.001031	2	3.4	1	0	0	1	7.39653	7.06221	NaN	NaN	7.12642	36.468
TGVEG_258470;TGME49_258470;TGGT1_258470	hypothetical protein	N/A	0	-0.342489	28.0383	28.1384	27.6328	27.8589			2.0547e-11	10	20.4	3	2	3	2	9.0732	8.52903	8.5182	8.44801	8.37142	31.707
TGVEG_258730;TGME49_258730;TGGT1_258730	hypothetical protein;putative transmembrane protein	N/A	1	NaN	NaN	NaN	26.4527	NaN			1.8794e-08	4	17.9	0	1	3	1	8.41755	NaN	7.81893	8.10609	7.83233	16.684
TGVEG_258740;TGME49_258740;TGGT1_258740	eukaryotic initiation factor-2A, putative;putative eukaryotic initiation factor-2A	N/A	0	0.164865	NaN	26.3903	NaN	26.5551			5.9421e-09	7	9.8	1	4	1	2	8.43415	7.4982	8.13735	7.31614	7.91561	64.654
TGVEG_258826;TGME49_258826;TGGT1_258826	hypothetical protein;thioredoxin domain protein	HMM: MWRSSPLPRSFPRLLLALASLCCLYLP, NN: MWRSSPLPRSFPRLLLALASLCCLYLP;HMM: MWRSSPLPRSFPRLLLALASLCCLYLPPPPVYVHPC, NN: MWRSSPLPRSFPRLLLALASLCCLYLP	1	-0.166302	NaN	24.7873	24.3811	24.8609		+	2.5525e-10	7	3.6	1	2	3	3	8.04817	6.99222	7.47439	7.65889	7.42326	111.84
TGVEG_258870;TGME49_258870;TGGT1_258870B	hypothetical protein;putative transmembrane protein	N/A	1;2	-0.00979042	30.404	30.4293	30.4581	30.3556			1.5581e-85	64	25.3	11	13	15	10	9.83258	9.11846	9.30044	9.32342	9.14123	101.6
TGVEG_258930;TGME49_258930;TGGT1_258930	peptidylprolyl isomerase	N/A	0	0.106285	NaN	25.887	25.9932	NaN			3.1838e-06	6	19	1	2	2	1	8.49999	7.93841	7.89063	7.9636	7.77629	13.003
TGVEG_258950;TGME49_258950;TGGT1_258950	lectin family protein	HMM: MAQGTVSLPRSGISAVSAFTLASCLLLSPLALFFLSVTASQ, NN: MAQGTVSLPRSGISAVSAFTLASCLLLSPLALFFLSVTAS	2	-0.0467234	27.5823	27.3651	27.4474	27.4066			1.4531e-24	25	10.8	5	7	5	5	8.94158	8.20534	8.42159	8.4192	8.27217	70.29
TGVEG_259000;TGME49_259000;TGGT1_259000	hypothetical protein;putative transmembrane protein	N/A	2	NaN	NaN	NaN	NaN	22.7665			2.6319e-05	2	8.3	0	0	1	1	7.24117	NaN	NaN	6.98616	6.88867	24.253
TGVEG_259010;TGME49_259010;TGGT1_259010	putative vacuolar ATP synthase subunit d;vacuolar ATP synthase subunit d, putative	N/A	0	NaN	NaN	NaN	26.629	NaN			4.1255e-07	5	7.1	2	2	3	2	8.67739	8.03515	8.14814	8.15912	7.91605	44.951
TGVEG_259240;TGME49_259240;TGGT1_259240	ribosomal protein RPS21	N/A	0	-0.15978	31.3473	31.5288	31.2388	31.3178			9.386e-63	53	70.7	5	5	5	5	10.1091	9.52123	9.55636	9.50985	9.43143	9.0341
TGVEG_259260;TGME49_259260;TGGT1_259260	membrane protein FtsH1	N/A	1	-0.133641	NaN	29.3273	29.1379	29.2494			4.6193e-10	7	4.6	0	4	2	3	9.37269	NaN	8.93725	8.92949	8.80831	136.92
TGVEG_259660;TGME49_259660;TGGT1_259660	orotate phosphoribosyltransferase	N/A	0	NaN	NaN	NaN	NaN	25.8688			1.3963e-11	6	5.3	1	1	1	1	8.414	7.68706	7.80447	7.90612	7.82255	31.593
TGVEG_259710;TGME49_259710;TGGT1_259710	protein kinase	N/A	0	NaN	NaN	NaN	NaN	25.6877			1.6125e-11	3	12.7	1	1	1	1	8.31507	7.68467	7.30432	7.89992	7.76804	28.945
TGVEG_259880;TGME49_259880;TGGT1_259880	hypothetical protein	N/A	0	NaN	NaN	NaN	24.1595	NaN			7.2839e-12	2	3.4	0	0	1	1	7.41577	NaN	NaN	7.41577	NaN	88.174
TGVEG_260180;TGME49_260180;TGGT1_260180	hypothetical protein	N/A	0	NaN	NaN	NaN	NaN	27.8464			6.6063e-15	6	28	1	1	1	3	8.73838	8.0323	7.78646	8.0677	8.41789	17.94
TGVEG_260260;TGME49_260260;TGGT1_260260	ribosomal protein RPP1	N/A	0	NaN	NaN	27.6312	NaN	NaN			4.2582e-42	8	34.1	1	2	1	1	8.7574	7.51739	8.41128	7.91857	8.29752	18.802
TGVEG_260320;TGME49_260320;TGGT1_260320	Noc2p family protein	N/A	0	NaN	NaN	NaN	NaN	22.8034			0.0016583	4	0.9	1	1	1	1	7.75042	7.25554	7.2388	7.11428	6.89976	115.35
TGVEG_260440;TGME49_260440;TGGT1_260440	nuclear factor NF3	N/A	0	-0.294078	30.6867	30.5161	30.2458	30.3688			9.8833e-95	57	32.8	11	9	9	9	9.83808	9.25777	9.30205	9.22029	9.14987	33.97
TGVEG_260500;TGME49_260500;TGGT1_260500	COPI associated protein, putative;putative COPI associated protein	N/A	4	-0.274336	28.1231	28.4419	27.9344	28.0819			1.6202e-13	14	18.1	5	3	3	2	9.13427	8.69396	8.52438	8.45947	8.3901	29.924
TGVEG_260520;TGME49_260520;TGGT1_260520	hypothetical protein	N/A	0	NaN	NaN	NaN	26.018	NaN			4.2888e-14	5	8.2	2	1	2	1	8.2946	7.7227	7.20548	7.97524	7.52816	77.122
TGVEG_260600;TGME49_260600;TGGT1_260600	Pumilio-family RNA binding repeat-containing protein	N/A	0	NaN	NaN	24.2564	NaN	NaN			1.1379e-05	1	1	0	1	0	0	7.39533	NaN	7.39533	NaN	NaN	172.45
TGVEG_260630;TGME49_260630;TGGT1_260630	DnaJ family Sec63 protein	N/A	3	0.233994	NaN	26.2023	26.4363	NaN			9.8687e-19	11	12	3	5	2	2	8.6509	8.21564	8.16026	7.85387	7.82772	76.759
TGVEG_261010;TGME49_261010;TGGT1_261010	putative tat-binding family protein;tat-binding family protein, putative	N/A	0	-0.138466	27.7607	27.7838	27.6363	27.6312			1.413e-38	21	28.1	6	5	5	4	9.01849	8.30436	8.4791	8.52576	8.31178	46.073
TGVEG_261070;TGME49_261070;TGGT1_261070	apicoplast triosephosphate translocator APT1	N/A	6;7	NaN	NaN	NaN	NaN	25.6987			0.0010548	4	2.8	1	1	1	1	8.45071	7.71939	7.8928	7.96705	7.77136	37.919
TGVEG_261210;TGME49_261210;TGGT1_261210	26s proteasome subunit p55, putative;putative 26s proteasome subunit p55	N/A	0	0.0280132	27.3837	27.5329	27.4647	27.5079			4.6137e-58	22	20.6	4	6	6	3	8.95867	8.21558	8.50734	8.52958	7.92849	55.049
TGVEG_261240;TGME49_261240;TGGT1_261240;TGVEG_218260;TGME49_218260;TGGT1_218260	histone H3;histone H3.3	N/A	0	-0.154331	33.965	33.8983	33.7528	33.8017			2.9888e-21	59	52.9	7	7	6	6	10.8582	10.2498	10.3329	10.1705	10.2563	15.402
TGVEG_261250;TGME49_261250;TGGT1_261250	histone H2A1	N/A	0	0.273582	30.033	30.8076	30.71	30.6778			1.2266e-11	32	17.8	1	1	1	1	9.97525	9.22279	9.48753	9.40078	9.33977	19.546
TGVEG_261400;TGME49_261400;TGGT1_261400	hypothetical protein	HMM: MENSARVSFSWSRAARPCLHCLGSLFLVLCFTQATLGS, NN: MENSARVSFSWSRAARPCLHCLGSLFLVLCFTQATLGS	0	NaN	27.1308	NaN	NaN	NaN			5.0731e-07	4	7.8	3	1	0	0	8.24276	8.1672	7.44616	NaN	NaN	50.421
TGVEG_261460;TGME49_261460;TGGT1_261460	transcriptional elongation factor FACT80	N/A	0	NaN	NaN	23.8985	NaN	NaN			0.00041306	0	5.9	0	1	0	1	7.42451	NaN	7.2876	NaN	6.85651	60.807
TGVEG_261570;TGME49_261570;TGGT1_261570	ribosomal protein RPL7A	N/A	0	-0.231048	32.1922	31.9483	31.8849	31.7936			2.7536e-82	91	41.3	15	14	14	11	10.2968	9.71324	9.72796	9.76822	9.53507	31.031
TGVEG_261580;TGME49_261580;TGGT1_261580	histone H2AX	N/A	0	-0.15023	29.6026	NaN	29.4524	NaN			6.8211e-06	7	13.3	2	1	2	1	9.522	8.90722	8.92923	9.01355	8.80458	14.51
TGVEG_261600;TGME49_261600;TGGT1_261600	creatinase domain-containing protein	N/A	0	NaN	NaN	23.1608	NaN	NaN			0.00039291	2	2	0	2	0	0	7.06551	NaN	7.06551	NaN	NaN	96.174
TGVEG_261710;TGME49_261710;TGGT1_261710	ankyrin repeat-containing protein	N/A	0	NaN	NaN	26.2788	NaN	NaN			4.4216e-08	3	11.6	0	2	0	1	8.21484	NaN	8.00415	NaN	7.79961	23.448
TGVEG_261750;TGME49_261750;TGGT1_261750	rhoptry neck protein RON10	N/A	0	NaN	24.5398	NaN	NaN	NaN			1.7251e-12	3	2.8	2	1	0	0	7.61459	7.38723	7.22479	NaN	NaN	91.266
TGVEG_261950;TGME49_261950;TGGT1_261950	ATP synthase beta subunit ATP-B	N/A	0	-0.0107613	31.7647	31.8869	31.8159	31.8142			4.9267e-216	126	56.4	15	16	17	14	10.2677	9.536	9.75022	9.72974	9.61232	59.916
TGVEG_262040;TGME49_262040;TGGT1_262040	SAC3/GANP family protein	N/A	0	0.000865936	29.1447	29.3006	29.2	29.247			8.3609e-37	34	32.7	6	7	8	7	9.46725	8.80442	8.85661	8.90263	8.89055	29.693
TGVEG_262050;TGGT1_262050	rhoptry kinase family protein ROP39	HMM: MSKPFFPQVRVSCTGGVLNLRRHWLRVGNMSRSFAPTVLFVLLNVGGGL, NN: MSKPFFPQVRVSCTGGVLNLRRHWLRVGNMSRSFAPTVLFVLLNVGGGL;HMM: MSKPFFPQVWVSCTGGVLNLRRHWLRVGNMSRAFAPTVLFVLLNVGGSL, NN: MSKPFFPQVWVSCTGGVLNLRRHWLRVGNMSRAFAPTVLFVLLNVGGSL	0	-0.177819	29.0354	28.8833	28.7873	28.7758			8.4984e-34	27	13.6	6	5	5	5	9.36258	8.7408	8.79197	8.79993	8.70214	65.118
TGVEG_262150;TGME49_262150;TGGT1_262150	kelch repeat and K+ channel tetramerisation domain containing protein	N/A	0	NaN	NaN	22.2892	NaN	NaN			4.4299e-06	4	3.5	2	1	1	0	7.38918	7.25876	6.80315	NaN	NaN	88.994
TGVEG_262380;TGME49_262380;TGGT1_262380	elongation factor Tu, putative;putative elongation factor Tu	HMM: MATNLILRFRVGVSRPHTAAVGAAVPFCRASVAV, NN: MATNLILRFRVGVSRPHTAAVGAAVPFCRASVAV	0	-0.0926981	28.3168	28.5711	28.2397	28.4628			4.9356e-25	22	18.3	4	6	7	5	9.2349	8.36949	8.76306	8.75308	8.52829	59.672
TGVEG_262620;TGME49_262620;TGGT1_262620	RNA recognition motif-containing protein	N/A	0	-0.0697689	32.3397	32.474	32.3544	32.3198			2.2971e-119	106	45.1	13	14	14	13	10.4224	9.7965	9.89061	9.85514	9.72054	31.76
TGVEG_262640;TGME49_262640;TGGT1_262640	Cg8 family protein	N/A	1	-0.209874	27.2594	27.2558	27.3572	26.7383			1.0572e-07	10	18.1	2	2	2	3	8.8615	8.03193	8.32917	8.38511	8.21272	23.76
TGVEG_262670;TGME49_262670;TGGT1_262670	ribosomal protein RPL18A	N/A	0	-0.176342	32.2398	32.4437	32.2064	32.1244			1.0682e-52	88	64.5	13	11	10	10	10.388	9.73843	9.8893	9.82725	9.65214	21.33
TGVEG_262690;TGGT1_262690;TGME49_262690	ribosomal protein RPL27	N/A	0	-0.0482416	31.296	31.6086	31.3878	31.4204			4.7081e-32	58	55.6	9	7	7	7	10.1492	9.46373	9.61018	9.59612	9.50124	16.33
TGVEG_262720;TGME49_262720;TGGT1_262720	eukaryotic initiation factor-1A, putative;putative eukaryotic initiation factor-1A	N/A	0	-0.295378	28.314	28.4643	28.0801	28.1074			1.0279e-27	11	32.7	3	2	4	2	9.17834	8.55878	8.60185	8.67199	8.44096	17.936
TGVEG_262730;TGME49_262730;TGGT1_262730	rhoptry protein ROP16	HMM: MKVTTKGLAFALALLFCTRCATAR, NN: MKVTTKGLAFALALLFCTRCATAR	0	0.15773	NaN	27.2437	NaN	27.4015			4.7581e-17	7	8.6	1	3	3	3	8.81142	7.73561	8.28416	8.31093	8.2931	76.071
TGVEG_262910;TGME49_262910;TGGT1_262910	NADH-cytochrome b5 reductase 1, putative;putative NADH-cytochrome b5 reductase 1	N/A	1	NaN	25.3589	NaN	NaN	NaN			0.00056827	1	7.4	1	0	1	0	7.76421	7.63379	NaN	7.1782	NaN	37.561
TGVEG_262920;TGGT1_262920;TGME49_262920	trypsin domain-containing protein	HMM: MAAFHRSRRPRARTGVMLLLLSLFVALEASSWISSD, NN: MAAFHRSRRPRARTGVMLLLLSLFVALEAS;HMM: MAAFHRSRRPRARTGVMLLLLSLFVALEVSSW, NN: MAAFHRSRRPRARTGVMLLLLSLFVALEVSSW	1	NaN	NaN	NaN	25.7536	NaN			3.1675e-17	8	5.7	2	1	2	2	8.38202	7.82898	7.7653	7.89565	7.56415	104.55
TGVEG_262930;TGME49_262930;TGGT1_262930	dolichol-phosphate mannosyltransferase subunit 3;hypothetical protein	HMM: MSRGKKFVAIALVLAGLWTWTLFSIASQH, NN: MSRGKKFVAIALVLAGLWTW	2	NaN	NaN	25.6335	NaN	NaN			1.4453e-07	2	12.3	1	1	0	0	8.08228	7.75058	7.80988	NaN	NaN	12.66
TGVEG_263040;TGME49_263040;TGGT1_263040	ribosomal protein RPS16	N/A	0	0.00168228	31.9315	32.0192	31.9722	31.9819			2.1594e-36	56	47.4	8	8	8	8	10.3054	9.56963	9.71345	9.81569	9.67913	24.055
TGVEG_263050;TGME49_263050;TGGT1_263050	ribosomal protein RPL13	N/A	0	-0.249302	32.4026	32.2088	32.0652	32.0476			9.6675e-36	96	29.9	10	12	12	12	10.3705	9.61099	9.84738	9.83814	9.73736	39.682
TGVEG_263070;TGME49_263070;TGGT1_263070	CMGC kinase, CK2 family	N/A	0	0.246126	28.2648	28.2917	28.3973	28.6514			9.9592e-40	33	20.6	7	8	7	6	9.22719	8.49672	8.66266	8.6965	8.61947	59.808
TGVEG_263080;TGME49_263080;TGGT1_263080	hypothetical protein	N/A	0	0.34452	26.1392	26.3098	26.7584	26.3797			2.5278e-14	9	34.6	3	2	2	3	8.62047	7.91695	7.89644	8.0769	8.13536	14.407
TGVEG_263090;TGME49_263090;TGGT1_263090	14-3-3 protein	N/A	0	-0.108524	32.9301	33.0443	32.6701	33.0873			1.8696e-224	127	65.3	15	17	17	17	10.592	9.90771	10.0674	9.98086	9.98926	37.173
TGVEG_263130;TGME49_263130;TGGT1_263130	citrate synthase, putative;putative citrate synthase	N/A	0	0.166273	NaN	26.4747	26.641	NaN			7.7359e-20	10	10.6	4	2	2	2	8.77126	8.24775	8.0604	8.16518	8.18313	69.011
TGVEG_263180;TGME49_263180;TGGT1_263180	myosin D	N/A	0	0.0110321	29.3929	29.3455	29.2397	29.5208			2.5033e-75	54	27	14	11	12	11	9.49461	9.06577	8.70598	8.77387	8.93322	91.051
TGVEG_263190;TGME49_263190;TGGT1_263190	adenylosuccinate lyase, putative;putative adenylosuccinate lyase	HMM: MAPPSACAAPASAGVCAA, NN: MAPPSACAAPASAGVCAAE;HMM: MAPPSACAAPTSAGVCAA, NN: MAPPSACAAPTSAGVCAAE	0	NaN	NaN	NaN	NaN	24.9242			0.0004734	0	5.2	0	0	1	2	7.68408	NaN	NaN	7.13941	7.53821	55.274
TGVEG_263300;TGME49_263300;TGGT1_263300	eukaryotic porin protein	N/A	0	-0.0768909	31.6153	31.3598	31.4455	31.3758			5.6869e-150	87	60.7	16	14	15	13	10.1387	9.56314	9.54926	9.60071	9.41081	31.352
TGVEG_263320;TGME49_263320;TGGT1_263320	hypothetical protein	N/A	0	-0.258197	28.0012	28.1584	27.8542	27.789			1.4196e-17	18	15.1	4	5	4	5	9.09489	8.23822	8.64682	8.5173	8.47521	42.093
TGVEG_263470;TGGT1_263470	ubiquitin carboxyl-terminal hydrolase UCHL3	N/A	0	NaN	NaN	NaN	NaN	25.3561			1.0322e-05	1	7.6	0	0	0	1	7.66823	NaN	NaN	NaN	7.66823	29.017
TGVEG_263500;TGME49_263500;TGGT1_263500	putative vacuolar protein sorting-associated protein 26;vacuolar protein sorting-associated protein 26, putative	N/A	0	NaN	NaN	NaN	NaN	26.0853			9.1514e-08	4	5.4	0	1	1	2	8.38961	NaN	7.91615	7.93242	7.88771	42.382
TGVEG_263520;TGME49_263520;TGGT1_263520	microtubule associated protein SPM1	N/A	0	-0.239757	27.6148	27.4374	27.3764	27.1963			2.231e-25	11	23.6	4	5	2	2	8.92295	8.31948	8.55919	8.18735	8.0508	38.768
TGVEG_263530;TGME49_263530;TGGT1_263530	chaperonin, putative;putative chaperonin	N/A	0	0.206782	28.3047	28.8254	28.7341	28.8095			1.3846e-11	24	23.6	2	3	3	2	9.34715	8.50533	8.86902	8.91637	8.53075	13.832
TGVEG_263630;TGME49_263630;TGGT1_263630	hypothetical protein	HMM: MLEVKRRSFSVSFRFLLSFLLQRTTPTLGC, NN: MLEVKRRSFSVSFRFLLSFLLQRTTPT	0	-0.343062	27.4972	NaN	26.9821	27.3263			3.1819e-09	9	28.7	3	1	2	2	8.78051	8.40775	7.7859	8.164	8.14795	15.488
TGVEG_263700;TGME49_263700;TGGT1_263700	ribosomal protein RPS14	N/A	0	-0.110887	31.6103	31.4359	31.4204	31.404			3.3654e-72	74	53.8	10	10	11	11	10.1426	9.56033	9.50508	9.60606	9.47946	16.301
TGVEG_263720;TGME49_263720;TGGT1_263720	HMG (high mobility group) box domain-containing protein	N/A	0	0.487473	26.5968	25.9239	26.7478	NaN			1.2526e-10	7	20.7	3	2	2	1	8.55071	8.10483	7.84593	8.11608	7.4364	16.573
TGVEG_263730;TGME49_263730;TGGT1_263730	FAD-dependent glycerol-3-phosphate dehydrogenase	HMM: MRRFGRVFACSAGLVGLGGAAAY, NN: MRRFGRVFACSAGLVGLGGAA	1	NaN	NaN	NaN	24.9274	NaN			2.6167e-08	1	5.8	1	0	1	0	7.93897	7.62877	NaN	7.64693	NaN	71.546
TGVEG_263850;TGME49_263850;TGGT1_263850	hypothetical protein	N/A	0	0.0413198	29.3576	29.6031	29.4491	29.5942			3.4203e-45	34	38	7	6	7	4	9.56019	8.87416	9.08264	9.03747	8.76663	25.122
TGVEG_263990;TGME49_263990;TGGT1_263990	hypothetical protein	N/A	0	NaN	NaN	NaN	NaN	24.4799			1.8472e-05	1	16.4	0	0	1	1	7.80511	NaN	NaN	7.58507	7.40446	15.406
TGVEG_264000;TGME49_264000;TGGT1_264000	aldehyde dehydrogenase	N/A	0	NaN	NaN	22.971	NaN	NaN			8.6633e-05	3	1.6	1	1	1	0	7.20774	6.77368	7.00839	NaN	NaN	68.974
TGVEG_264080;TGME49_264080;TGGT1_264080	acyl carrier protein ACP	HMM: MEMHPRNAGRKTLLALALFMATSIASSYGF, NN: MEMHPRNAGRKTLLALALFMATSIASSYGF	1	NaN	NaN	NaN	25.43	NaN			1.2734e-06	3	7.1	1	1	1	0	8.32296	7.80137	7.92545	7.79821	NaN	19.38
TGVEG_264440;TGME49_264440;TGGT1_264440	signal recognition particle receptor beta subunit protein	N/A	1	NaN	NaN	NaN	NaN	25.6881			7.4811e-10	4	5.2	1	1	1	1	8.32449	7.4114	7.75896	7.84052	7.76816	37.468
TGVEG_264610;TGME49_264610;TGGT1_264610	RNA recognition motif-containing protein	N/A	0	-0.0433807	29.9843	29.8585	29.8958	29.8602			2.3948e-77	56	28.8	7	10	11	10	9.68187	8.91452	9.08311	9.23386	9.0258	45.032
TGVEG_264660;TGGT1_264660;TGME49_264660	SAG-related sequence SRS44	N/A	0;1	-0.0476284	29.0503	29.1716	29.1634	28.9632			1.0192e-78	53	13.3	15	14	13	10	9.43154	8.82053	8.91901	8.89985	8.61873	250.69
TGVEG_264830;TGME49_264830;TGGT1_264830	hypothetical protein	N/A	0	NaN	NaN	NaN	NaN	25.7198			0.00070797	4	1.7	1	1	1	2	8.29796	7.48028	7.65977	7.79764	7.77769	136.57
TGVEG_265250;TGME49_265250;TGGT1_265250	RNA recognition motif-containing protein	N/A	0	NaN	22.7187	NaN	NaN	NaN			1.6608e-05	2	1.7	2	0	0	0	6.839	6.839	NaN	NaN	NaN	160.18
TGVEG_265310;TGME49_265310;TGGT1_265310	heat shock protein 40, putative;putative heat shock protein 40	N/A	0	NaN	26.8246	27.7526	NaN	NaN			9.4772e-16	7	13.7	3	2	3	1	8.7241	8.21814	8.34809	8.05561	7.44697	37.197
TGVEG_265330;TGME49_265330;TGGT1_265330	cell-cycle-associated protein kinase GSK, putative;putative cell-cycle-associated protein kinase GSK	N/A	0	0.384668	28.1329	28.5238	28.7334	28.6926			4.2158e-40	24	26.9	4	7	6	5	9.27749	8.31919	8.77364	8.8204	8.63435	44.467
TGVEG_265450;TGME49_265450;TGGT1_265450	hexokinase	N/A	0	0.0458136	29.8578	29.6922	29.8292	29.8124			7.3149e-74	51	37.4	10	12	11	7	9.65036	8.94874	9.21659	9.11441	8.80197	51.467
TGVEG_265530;TGME49_265530;TGGT1_265530	RNA recognition motif-containing protein	N/A	0	NaN	28.1107	26.4959	NaN	NaN			1.8886e-21	11	12.2	3	3	2	1	8.82266	8.38714	8.24147	8.15467	8.01595	51.487
TGVEG_266060;TGME49_266060;TGGT1_266060	ribosomal protein RPSA	N/A	0	-0.0781822	32.5242	32.7159	32.5902	32.4935			2.3862e-136	103	58.9	14	13	12	12	10.4915	9.82208	9.97132	9.97031	9.75351	31.512
TGVEG_266070;TGME49_266070;TGGT1_266070	ribosomal protein RPL31	N/A	0	-0.342145	31.5003	31.3331	31.1444	31.0047			1.1323e-33	50	45.8	5	5	4	6	10.0813	9.46467	9.51366	9.537	9.38687	14.355
TGVEG_266080;TGME49_266080;TGGT1_266080	hypothetical protein	N/A	0	NaN	NaN	NaN	NaN	26.0467			7.1862e-07	5	3.8	1	2	0	2	8.12843	6.92488	7.70596	NaN	7.87613	81.281
TGVEG_266460;TGME49_266460;TGGT1_266460	putative small ubiquitin family modifier;small ubiquitin family modifier, putative	N/A	0	-0.187544	NaN	27.3048	NaN	27.1172			0.00021762	9	17.6	1	2	1	2	8.77899	7.9922	8.36944	8.13316	8.12369	10.319
TGVEG_266640;TGME49_266640;TGGT1_266640	Acetyl-coenzyme A synthetase 2, putative;putative Acetyl-coenzyme A synthetase 2	N/A	0	0.0565758	30.1382	30.4671	30.3421	30.3764			3.6895e-88	70	33.9	14	13	17	12	9.80781	9.13837	9.22686	9.31105	9.11929	79.99
TGVEG_266760;TGME49_266760;TGGT1_266760	isocitrate dehydrogenase	HMM: MYPLLCVFFAFFSPVHAR, NN: MYPLLCVFFAFFSPVHAR	0	-0.0152102	NaN	26.9152	26.7462	27.0538			5.9771e-23	11	12.1	1	5	3	2	8.68187	7.04895	8.35027	8.14879	8.01966	66.341
TGVEG_266960;TGME49_266960;TGGT1_266960	beta tubulin;beta-tubulin	N/A	0	0.0651016	32.9245	33.4285	33.2312	33.2521			1.5267e-289	248	65	22	20	20	21	10.6919	9.99675	10.1608	10.1376	10.0438	50.073
TGVEG_266970;TGME49_266970;TGGT1_266970	hypothetical protein;ubiquitin family protein	N/A	0	NaN	26.2553	NaN	NaN	NaN			2.6299e-07	6	8.5	2	1	1	1	8.24107	7.90362	7.52729	7.48478	7.4757	35.154
TGVEG_267060;TGME49_267060;TGGT1_267060	ribosomal protein RPL14	N/A	0	-0.396851	31.3908	31.1037	30.8768	30.824			2.7589e-24	42	34.4	6	7	7	6	10.0217	9.40741	9.46854	9.43802	9.35675	17.878
TGVEG_267140;TGME49_267140;TGGT1_267140;TGGT1_367060	SAG-related sequence protein SRS38D;SAG-related sequence SRS38B;SAG-related sequence SRS38D	HMM: MANTIMMGEVSVAKARSSTTPFSLARVVKVRLSSASRLGCVALLLLASATGL, NN: MANTIMMGEVSVAKARSSTTPFSLARVVKVRLSSASRLGCVALLLLASATGL;HMM: MASVSLGSPAATKAAASASRPPVMGGVPVKLHLASRLGLVSLLLVATTAGLLGY, NN: MASVSLGSPAATKAAASASRPPVMGGVPVKLHLASRLGLVSLLLVATTAG;HMM: MASVSLGSPAVIKAAASASRPPVMRVVPVKLHLAFRLGLLSLLLVATMAGLLGY, NN: MASVSLGSPAVIKAAASASRPPVMRVVPVKLHLAFRLGLLSLLLVATMAG;HMM: MAYTIMVGEVSVAKARSSTTPCSLARVVKVRLSSASRLGCVTLLLL…	0;2	NaN	26.4457	NaN	NaN	NaN		+	5.6147e-13	3	10.8	3	0	0	0	7.96094	7.96094	NaN	NaN	NaN	40.909
TGVEG_267350;TGME49_267350;TGGT1_267350	LSM domain-containing protein	HMM: MKLVRFLMRLANETLVIELKNGT, NN: MKLVRFLMRLANETLVIELKNGT	0	NaN	NaN	NaN	24.7871	NaN			0.00068004	2	9.1	1	1	1	0	7.99603	7.5035	7.43086	7.60467	NaN	13.536
TGVEG_267400;TGME49_267400;TGGT1_267400	ribosomal protein RPL32	N/A	0	-0.160079	31.3186	31.2255	31.2148	31.0092			1.6929e-41	53	50	5	8	8	7	10.0787	9.43425	9.49817	9.55317	9.40593	15.617
TGVEG_267420;TGME49_267420;TGGT1_267420	mago nashi family protein 2, putative;putative mago nashi family protein 2	N/A	1	-0.270382	NaN	26.9266	NaN	26.6562			1.4244e-08	5	8.4	0	2	1	2	8.52366	NaN	8.18602	7.78979	8.07493	23.745
TGVEG_267500;TGME49_267500;TGGT1_267500	hypothetical protein	N/A	0	NaN	NaN	26.7932	NaN	NaN			5.9197e-06	5	8.3	1	2	1	1	8.42643	7.82062	8.159	7.47771	7.42393	25.697
TGVEG_267550;TGME49_267550;TGGT1_267550	leucine-rich repeat protein LRR1	N/A	0	NaN	NaN	25.1523	NaN	NaN			2.1514e-10	5	12.2	0	2	1	2	8.21943	NaN	7.66504	7.47141	7.95372	41.245
TGVEG_267580;TGME49_267580;TGGT1_267580	cyclin2 related protein	N/A	0	NaN	NaN	NaN	22.9578	NaN			0.00033294	1	2.4	1	1	1	0	7.50943	NaN	7.32205	7.054	NaN	94.812
TGVEG_267620;TGME49_267620;TGGT1_267620	multi-pass transmembrane protein	N/A	3	NaN	NaN	27.0809	NaN	NaN			0.0001947	3	4.5	0	1	1	1	8.45545	NaN	8.24561	7.2385	7.96399	57.684
TGVEG_267810;TGME49_267810;TGGT1_267810	Rab 5	N/A	0	NaN	NaN	NaN	25.7703	NaN			2.9046e-21	3	26.6	1	1	2	2	8.43299	7.36167	7.90336	7.90066	7.94651	26.489
TGVEG_267840;TGME49_267840;TGGT1_267840	tetratricopeptide repeat-containing protein	N/A	0	NaN	NaN	NaN	NaN	22.6873			0.0044944	0	2.9	0	0	0	1	6.86482	NaN	NaN	NaN	6.86482	38.63
TGVEG_268200;TGME49_268200;TGGT1_268200	RNA recognition motif-containing protein	N/A	0	-0.0225153	29.7341	29.9464	29.7405	29.895			6.0049e-83	41	26.7	9	6	9	5	9.65753	8.96832	9.09167	9.16643	8.9606	66.429
TGVEG_268570;TGME49_268570;TGGT1_268570	zinc finger (CCCH type) motif-containing protein	N/A	0	NaN	NaN	NaN	NaN	25.1766			1.7733e-06	5	2.2	1	1	1	1	8.31486	7.74536	7.67725	7.79334	7.61418	47.062
TGVEG_268750;TGME49_268750;TGGT1_268750	peptidyl-prolyl cis-trans isomerase E, putative;putative peptidyl-prolyl cis-trans isomerase E	N/A	0	NaN	NaN	NaN	NaN	22.9605			0.0025693	1	6.9	0	0	0	1	6.94709	NaN	NaN	NaN	6.94709	16.262
TGVEG_268760;TGME49_268760;TGGT1_268760	hypothetical protein;putative transmembrane protein	HMM: MIHTGLDLPPLFSGPSTRMSLMANHVAVTMNLLGISLALTILFFPSLVHGW, NN: MIHTGLDLPPLFSGPSTRMSLMANHVAVTMNLLGISLALTILFFPSLVHGW	1	-0.462345	27.5371	27.4025	26.7958	27.2192			1.0999e-15	12	13.1	3	3	3	3	8.87731	8.19907	8.35568	8.25327	8.27818	31.585
TGVEG_268790;TGME49_268790;TGGT1_268790	hypothetical protein	HMM: MMIRISGHVCGGGRPGIPRWKSVLRKSIASFCFFVACKTWPGFVSCS, NN: MMIRISGHVCGGGRPGIPRWKSVLRKSIASFCFFVACKTW;HMM: MMIRISGHVCGGGRPGIPRWKSVLRKYIASFCFFVACKTWPGFVSCS, NN: MMIRISGHVCGGGRPGIPRWKSVLRKYIASFCFFVACKTW	0	-0.766329	NaN	28.0182	27.0743	27.4294			3.4153e-20	12	20.6	2	3	3	3	8.8699	7.51101	8.54558	7.97055	8.42167	27.275
TGVEG_268830;TGME49_268830;TGGT1_268835;TGVEG_268835	hypothetical protein	HMM: MQALRRGAAIPSRLLPRRDSWMSLAPFVAPNNAA, NN: MQALRRGAAIPSRLLPRRDSWMSLAPFVAPNNAAA;N/A	0	0.0321255	28.7547	28.9004	28.922	28.7974			1.7977e-51	27	29.3	6	5	7	8	9.3604	8.68598	8.81353	8.8626	8.63146	61.254
TGVEG_268850;TGME49_268850;TGGT1_268850	enolase 1;enolase 2	N/A	0	-0.274435	32.9576	32.8997	32.6954	32.613			8.1116e-224	126	61.7	16	17	17	15	10.5565	9.98445	9.9794	9.99541	9.84104	52.113
TGVEG_268870;TGME49_268870;TGGT1_268870	tetratricopeptide repeat-containing protein	N/A	0	-0.0217152	27.873	28.201	28.0166	28.014			1.0014e-46	27	16.5	7	11	8	7	9.11488	8.41096	8.59383	8.59057	8.42014	114.11
TGVEG_268890;TGME49_268890;TGGT1_268890	citrate synthase I	HMM: MLLSRLRDTAAAALVLRTSGSTAL, NN: MLLSRLRDTAAAALVLRTSGSTAL	0	-0.0192623	28.6418	28.7906	28.7309	28.663			1.8531e-35	36	19.6	5	6	6	7	9.31336	8.61176	8.78893	8.71106	8.71545	60.42
TGVEG_268950;TGGT1_268950;TGME49_268950	hypothetical protein;la domain protein	N/A	0	-0.0544672	27.771	28.1072	27.9209	27.8483			1.2993e-46	18	30.9	5	4	9	3	9.08987	8.43862	8.56337	8.68964	8.00022	60.167
TGVEG_269180;TGME49_269180;TGGT1_269180	MIF4G domain-containing protein	N/A	0	-0.368855	NaN	27.1337	26.7648	NaN			5.8094e-23	8	3.3	0	6	4	0	8.53466	NaN	8.23317	8.23406	NaN	272.97
TGVEG_269250;TGME49_269250;TGGT1_269250	Mov34/MPN/PAD-1 family protein	N/A	0	-0.0296621	28.1201	27.3541	27.8336	27.5813			5.2758e-19	19	22.4	5	4	4	5	9.01657	8.42469	8.34463	8.39014	8.4862	38.438
TGVEG_269410;TGME49_269410;TGGT1_269410	hypothetical protein	N/A	0	NaN	23.5906	NaN	NaN	NaN			4.1109e-05	1	7.8	1	0	0	0	7.10147	7.10147	NaN	NaN	NaN	24.095
TGVEG_269442;TGME49_269442;TGGT1_269442	calmodulin, putative;putative calmodulin	N/A	0	-0.145885	NaN	28.9825	NaN	28.8366			2.257e-11	5	24.1	0	2	1	3	9.12186	NaN	8.79703	8.17673	8.73804	9.7801
TGVEG_269650;TGME49_269650;TGGT1_269650	FFD and TFG box motifs protein	HMM: MAAAPLGSATAAGSDAA, NN: MAAAPLGSATAAGSDAA	0	0.130476	27.2663	NaN	NaN	27.3968			8.8097e-22	8	8.1	3	1	1	2	8.7561	8.22466	8.16741	7.84948	8.2667	51.44
TGVEG_269690;TGME49_269690;TGGT1_269690	hypothetical protein;putative transmembrane protein	HMM: MRPLRVAVALFWAMVAVVGFWAS, NN: MRPLRVAVALFWAMVAVVGF;HMM: MRPLRVTVALFWAMVAVVGFWAS, NN: MRPLRVTVALFWAMVAVVGF	1	0.113838	27.4615	27.3538	27.3177	27.7253			1.7103e-64	21	16.9	6	4	8	6	8.94504	8.27914	8.14233	8.51073	8.35799	94.306
TGVEG_269710;TGME49_269710;TGGT1_269710	hypothetical protein	N/A	0	NaN	NaN	NaN	21.309	NaN			0.0029472	1	0.9	0	0	1	0	6.55769	NaN	NaN	6.55769	NaN	170.44
TGVEG_269800;TGME49_269800;TGGT1_269800	glutamine-dependent NAD(+) synthetase protein, putative;putative glutamine-dependent NAD(+) synthetase protein	N/A	0	NaN	NaN	NaN	NaN	24.3245			0.0014826	2	1.5	0	1	0	1	7.6474	NaN	7.33478	NaN	7.35767	94.469
TGVEG_269840;TGME49_269840;TGGT1_269840	proteasome regulatory subunit	N/A	0	-0.240093	NaN	27.9191	27.679	NaN			2.4055e-14	10	16.2	1	4	3	2	8.88214	7.88197	8.50073	8.47191	7.863	35.261
TGVEG_269980;TGME49_269980;TGGT1_269980	preprotein translocase Sec61, putative;putative preprotein translocase Sec61	HMM: MAKGFRFLNLIKPVMCILPEVQAP, NN: MAKGFRFLNLIKPVMCI	8	-0.243313	30.6206	30.508	30.4592	30.1827			3.6482e-20	38	11.6	6	7	6	7	9.84006	9.24761	9.30194	9.30935	9.04446	52.164
TGVEG_270240;TGME49_270240;TGGT1_270240	MAG1;MAG1 protein	HMM: MDCGQCRRQLHAAGVLGLFVTLATATVGLSQ, NN: MDCGQCRRQLHAAGVLGLFVTLATAT	1	0.24202	31.7986	31.8012	31.9882	32.0957			3.4267e-214	108	40	17	19	16	21	10.2844	9.53185	9.70429	9.73498	9.72851	49.195
TGVEG_270320;TGGT1_270320;TGME49_270320	protein phosphatase 2C domain-containing protein	HMM: MAGPRSPLRFVLLLSLLALKVFVDSPSVLPA, NN: MAGPRSPLRFVLLLSLLALKVFVDSP;HMM: MAGPRSPLRFVLLLSLLAR, NN: MAGPRSPLRFVLLLSLLARKVFVD	0	-0.108314	30.4191	30.4627	30.3991	30.2661			2.6514e-125	57	47.2	16	16	14	10	9.82631	9.17673	9.29104	9.33939	9.02625	58.732
TGVEG_270380;TGME49_270380;TGGT1_270380	ribosomal protein RPS13	N/A	0	-0.230119	32.2067	32.1077	31.9676	31.8866			8.3403e-32	52	51	6	8	5	7	10.3202	9.64217	9.8005	9.74575	9.66544	17.176
TGVEG_270530;TGME49_270530;TGGT1_270530	ubiquitin fusion degradation protein UFD1CY	N/A	0	0.862282	27.1555	26.611	27.7455	NaN			1.4528e-17	9	14.6	2	3	3	2	8.80626	7.9516	7.86652	8.65926	7.31848	36.503
TGVEG_270550;TGME49_270550;TGGT1_270550	gamma-glutamyl phosphate reductase, putative;putative gamma-glutamyl phosphate reductase	N/A	0	-0.134405	27.2369	NaN	NaN	27.1025			2.3916e-15	9	11.2	3	1	3	4	8.67775	8.21109	7.50899	8.11321	8.18041	54.409
TGVEG_270830;TGME49_270830;TGGT1_270830	small nuclear ribonucleoprotein	N/A	0	-0.182628	27.1428	26.8224	26.9101	26.6898			1.3053e-11	9	32.9	4	2	3	3	8.7601	8.26907	8.03834	8.18927	8.10003	17.524
TGVEG_270840;TGME49_270840;TGGT1_270840	poly(ADP-ribose) polymerase catalytic domain-containing protein	N/A	0	NaN	NaN	NaN	23.4717	NaN			0.0027801	1	1.2	0	0	1	0	7.20874	NaN	NaN	7.20874	NaN	113.4
TGVEG_271050;TGGT1_271050	SAG-related sequence SRS34A	HMM: MSFSKTTSLASLALTGLFVVFKFALAS, NN: MSFSKTTSLASLALTGLFVVFKFALAS	0	-0.287392	34.2196	32.7813	33.7705	32.6556		+	1.438e-122	100	51.6	9	6	8	6	10.7641	10.2752	10.0057	10.3206	9.91348	18.981
TGVEG_271440;TGME49_271440;TGGT1_271440	NPL4 family protein	N/A	0	0.122736	25.8604	25.7402	25.923	NaN			7.2217e-07	7	6.8	3	2	2	1	8.38933	7.87008	7.79264	7.89444	7.48414	55.803
TGVEG_271810;TGME49_271810;TGGT1_271810	lanp, putative;putative lanp	N/A	0	-0.403094	29.5483	29.2119	29.0389	28.915		+	1.1745e-25	23	28.6	6	5	4	4	9.45714	8.89564	8.97574	8.80402	8.69567	31.931
TGVEG_271888;TGME49_271888;TGGT1_271888	3-ketoacyl-CoA reductase, putative;putative 3-ketoacyl-CoA reductase	N/A	1;2	NaN	NaN	NaN	NaN	25.9294			9.6991e-17	7	15.8	4	1	1	1	8.70281	8.35313	8.03479	8.00561	7.8408	37.496
TGVEG_271930;TGME49_271930;TGGT1_271930	hypothetical protein	N/A	0	NaN	NaN	NaN	25.2301	NaN			8.1378e-16	4	15.4	1	1	2	1	8.16788	7.39702	7.57874	7.73805	7.4717	26.174
TGVEG_271970;TGME49_271970;TGGT1_271970	glideosome-associated protein with multiple-membrane spans GAPM3	N/A	5	-0.132694	29.5049	29.4702	29.496	29.2136		+	1.7752e-37	24	19	3	4	3	4	9.52364	9.0304	8.95749	8.9297	8.70701	34.282
TGVEG_272290;TGME49_272290;TGGT1_272290	pyruvate dehydrogenase complex subunit PD-HE1Beta	HMM: MAVLDVPLLFAFHFAFALSG, NN: MAVLDVPLLFAFHFAFAL;HMM: MAVLDVPLLFAFHFALALSG, NN: MAVLDVPLLFAFHFALAL	0	NaN	25.6417	26.5961	NaN	NaN			6.2999e-08	7	6	2	2	1	1	8.45446	7.71636	8.10096	7.7391	7.71348	50.022
TGVEG_272400;TGME49_272400;TGGT1_272400	casein kinase ii regulatory subunit protein	N/A	0	NaN	NaN	25.2112	NaN	NaN			3.5841e-05	3	8	1	1	0	1	8.15728	7.66494	7.68278	NaN	7.69229	39.721
TGVEG_272660;TGGT1_272660;TGME49_272660	hypothetical protein	HMM: MQTLKLSRALMPLTVVAFFLLSFSVASCR, NN: MQTLKLSRALMPLTVVAFFLLSFSVASCR	0	0.158214	27.4789	27.5327	27.6726	27.6555			4.476e-40	23	38.8	5	5	5	5	8.97897	8.32985	8.3505	8.49003	8.31351	28.036
TGVEG_272910;TGME49_272910;TGGT1_272910	T-complex protein 1 delta subunit	N/A	0	0.0524302	30.0585	30.3829	30.2598	30.2865			7.5316e-69	64	41.7	14	13	15	14	9.78387	9.07657	9.20159	9.29649	9.11949	58.644
TGVEG_273090;TGME49_273090;TGGT1_273090	ATPase, AAA family protein;cell division protein CDC48CY;transitional endoplasmic reticulum ATPase, putative	HMM: MECLIEATVSTWGNAPPLIACGVCASAATLAQLGAA, NN: MECLIEATVSTWGNAPPLIACGVCASAATLAQ;N/A	0	-0.0107956	32.0969	32.2108	32.0972	32.1889			1.4188e-188	164	43.9	28	30	29	26	10.3501	9.68205	9.81355	9.77122	9.7135	89.396
TGVEG_273370;TGME49_273370;TGGT1_273370	coatomer gamma 2-subunit protein, putative;putative coatomer gamma 2-subunit protein	N/A	0	-0.119752	27.2332	27.5936	27.2423	27.3449			3.4611e-30	15	9.6	4	3	6	3	8.91283	8.28981	8.29416	8.4513	8.15749	112.29
TGVEG_273460;TGME49_273460;TGGT1_273460	eukaryotic translation initiation factor 3 subunit 6 interacting protein	N/A	2	-0.194744	31.005	30.7807	30.7585	30.6376			4.3168e-132	84	43.3	18	15	14	15	9.93902	9.45571	9.32494	9.34139	9.1837	75.073
TGVEG_273520;TGME49_273520;TGGT1_273520	PCI domain-containing protein	N/A	0	-0.022583	30.4475	30.5292	30.3703	30.5612			1.0568e-116	68	35.1	12	17	13	14	9.85597	9.14541	9.32048	9.30023	9.22837	67.341
TGVEG_273560;TGME49_273560;TGGT1_273560	kinesin heavy chain, putative;putative kinesin heavy chain	N/A	0	NaN	NaN	25.0379	NaN	NaN			5.6611e-05	4	1.1	1	2	1	1	7.98447	7.03007	7.6306	7.19299	7.43867	181.38
TGVEG_273760;TGGT1_273760;TGME49_273760	heat shock protein HSP70	N/A	0	-0.0985775	34.4332	34.2424	34.2661	34.2123			0	317	61.3	35	37	37	35	10.9975	10.3469	10.4086	10.4602	10.3564	72.292
TGVEG_273870;TGME49_273870;TGGT1_273870	SWI2/SNF2 ISWI-like (AT hook)	N/A	0	NaN	NaN	NaN	26.4215	NaN			8.8721e-13	6	3.4	0	1	3	2	8.38444	NaN	7.56455	8.17794	7.74053	174.75
TGVEG_273930;TGME49_273930;TGGT1_273930	DNA topoisomerase domain-containing protein	HMM: MHGAVAAHLFFLQRCFCP, NN: MHGAVAAHLFFLQRCFCPFVFFKMAFFPRLFAD;N/A	0	NaN	NaN	25.0515	NaN	NaN			8.9846e-06	1	11.4	1	1	1	1	8.25959	7.55572	7.63471	7.55955	7.82254	27.997
TGVEG_274190;TGME49_274190;TGGT1_274190	eukaryotic initiation factor 2B epsilon subunit, putative;putative eukaryotic initiation factor 2B epsilon subunit	HMM: MSAPSSACSAAPASSGGA, NN: MSAPSSACSAAPASSGGA	0	-0.240952	26.1085	26.2088	25.8938	25.9416			3.3711e-18	12	6.2	3	2	4	3	8.52021	7.8852	7.85535	8.11588	7.71824	88.811
TGVEG_275480;TGME49_275480;TGGT1_275480	Myb family DNA-binding domain-containing protein	N/A	0	NaN	NaN	NaN	NaN	23.231			0.0058198	2	1	0	1	0	1	7.57867	NaN	7.43495	NaN	7.02849	99.286
TGVEG_275568;TGME49_275568;TGGT1_275568	GPI transamidase subunit PIG-U protein	N/A	10	NaN	NaN	NaN	NaN	23.4372			0.00039637	2	2	1	0	0	1	7.32358	6.94189	NaN	NaN	7.09058	60.946
TGVEG_275750;TGME49_275750;TGGT1_275750	putative small nuclear ribonucleoprotein E;small nuclear ribonucleoprotein E, putative	N/A	0	NaN	NaN	NaN	NaN	26.7457			3.279e-07	4	13.2	0	1	1	1	8.55369	NaN	8.08235	8.06036	8.0865	10.788
TGVEG_275810;TGME49_275810;TGGT1_275810	ribosomal protein RPS10	N/A	0	-0.13567	30.8045	31.2459	30.9613	30.8177			1.0028e-55	76	57.2	6	5	7	6	10.0135	9.33306	9.40454	9.51125	9.3765	17.398
TGVEG_275860;TGME49_275860;TGGT1_275860	hypothetical protein;putative dense granule protein GRA12	HMM: MDVRYQTRGAVAAVYVLFRTVVGA, NN: MDVRYQTRGAVAAVYVLFRTVVGAVLGLHCLKIVSAE	1	-0.299637	NaN	27.3494	27.0498	NaN			5.5788e-26	10	32.1	2	5	3	1	8.69067	7.87513	8.40157	8.17091	7.1819	43.229
TGVEG_276170;TGME49_276170;TGGT1_276170	phosphatidylinositol 3- and 4-kinase	N/A	0	NaN	NaN	NaN	25.1956	NaN			9.3612e-12	7	4.7	1	2	3	3	8.17519	7.18817	7.57274	7.72766	7.63812	134.58
TGVEG_277000;TGME49_277000;TGGT1_277000	putative transport protein Sec24;transport protein Sec24, putative	N/A	0	NaN	NaN	NaN	27.539	27.0397			1.5387e-14	9	7.2	1	2	4	3	8.68113	7.48424	7.54125	8.38625	8.23363	108.03
TGVEG_277490;TGME49_277490	hypothetical protein	HMM: MVRLARRVPAEGLRPLPRPQARSLVACVSVSHRNLSECK, NN: MVRLARRVPAEGLRPLPRPQARSL	0	-0.729752	28.5824	26.9193	26.9206	27.1217			0.0002557	9	1.1	1	2	1	1	8.95262	8.5912	8.31538	8.18904	8.16215	244.16
TGVEG_277760;TGME49_277760;TGGT1_277760	adenylosuccinate lyase, putative;putative adenylosuccinate lyase	N/A	0	NaN	NaN	25.1441	NaN	NaN			9.4574e-09	5	5.6	2	2	1	0	8.00337	7.37497	7.66258	7.49256	NaN	74.233
TGVEG_278050;TGGT1_278050;TGME49_278050	proteasome subunit alpha type 1, putative;putative proteasome subunit alpha type 1	N/A	0	-0.237389	28.8476	29.1002	28.9495	28.5236			1.1766e-30	28	34	6	4	4	5	9.36511	8.72234	8.8465	8.82167	8.62826	27.242
TGVEG_278530;TGME49_278530;TGGT1_278530	multiprotein bridging factor type 1 family transcriptional co-activator, putative;putative multiprotein bridging factor type 1 family transcriptional co-activator	N/A	0	-0.103973	28.4244	28.3629	28.2608	28.3186			7.3851e-27	14	36.8	3	4	4	3	9.21181	8.43173	8.56534	8.76653	8.60925	16.077
TGVEG_278830;TGME49_278830;TGGT1_278830	glucose-6-phosphate 1-dehydrogenase	N/A	0	-0.00714111	29.8203	30.0044	29.9314	29.8789			3.6343e-102	89	35.9	21	18	17	17	9.67316	9.02946	9.14023	9.05835	9.04786	98.279
TGVEG_278870;TGME49_278870;TGGT1_278870	myosin F	N/A	0	0.0251637	27.8395	27.5438	NaN	27.7169			3.6054e-43	18	6.9	8	6	1	5	8.8889	8.45442	8.39881	7.74025	8.26501	216.38
TGVEG_278950;TGME49_278950;TGGT1_278950	LSM domain-containing protein	N/A	0	NaN	NaN	NaN	NaN	22.8347			0.0037055	4	6.6	1	1	1	1	7.64647	6.9259	7.15694	7.1274	6.90921	13.335
TGVEG_278960;TGME49_278960;TGGT1_278960	hypothetical protein;putative transmembrane protein	N/A	6	NaN	23.9071	NaN	NaN	NaN			0.0024049	1	2.8	1	0	0	0	7.19676	7.19676	NaN	NaN	NaN	58.35
TGVEG_278990;TGME49_278990;TGGT1_278990	phosphate carrier, putative;putative phosphate carrier	N/A	1	0.117109	30.2077	30.6005	30.5877	30.4546			3.6016e-56	62	28	10	10	9	8	9.85533	9.14233	9.33818	9.32232	9.17606	53.093
TGVEG_279100	putative transmembrane protein	HMM: MWRIWRCRLSFLFVTGCLLGALTAGLGS, NN: MWRIWRCRLSFLFVTGCLLGALTA	1	-0.0510597	29.0628	29.0137	29.0152	28.9593			4.8409e-90	20	32.6	3	3	3	3	9.40598	8.77708	8.78462	8.88956	8.75104	47.657
TGVEG_279380;TGME49_279380;TGGT1_279380	hypothetical protein;putative hydrolase family or acyltransferase family	N/A	0	0.260449	28.7636	29.4096	29.5496	29.1445			5.9981e-41	23	38.1	6	6	6	7	9.4733	8.6318	8.92674	8.80552	9.02596	34.769
TGVEG_279390;TGME49_279390;TGGT1_279390	proliferation-associated protein 2G4, putative;putative proliferation-associated protein 2G4	N/A	0	-0.177549	31.3089	31.2085	31.0956	31.0667			4.8953e-98	94	47.4	15	20	15	15	10.0561	9.43011	9.53638	9.48503	9.3411	50.292
TGVEG_279400;TGGT1_279400;TGME49_279400	glutaredoxin, putative;putative glutaredoxin	N/A	0	NaN	NaN	NaN	26.9308	NaN			2.7884e-13	5	32.2	1	1	2	1	8.52899	7.68214	7.58209	8.25001	7.86881	16.252
TGVEG_279450;TGME49_279450;TGGT1_279450	adenylosuccinate synthetase, putative;putative adenylosuccinate synthetase	N/A	0	NaN	NaN	26.0648	NaN	NaN			1.2291e-15	5	10	1	2	2	0	8.25849	7.32801	7.93974	7.86341	NaN	50.661
TGVEG_280490;TGME49_280490;TGGT1_280490	U-box domain-containing protein	N/A	0	-0.00222588	NaN	26.0497	26.0556	26.0393			8.4915e-30	13	5.9	2	4	4	3	8.43586	7.1599	7.94731	7.99007	7.8576	121.96
TGVEG_280550;TGME49_280550;TGGT1_280550	clathrin adaptor complex small chain subfamily protein	HMM: MAGLSVSGVALLDSEGE, NN: MAGLSVSGVALLDSEGE	0	NaN	NaN	NaN	25.3792	NaN			0.0011892	3	4.3	1	1	1	0	8.24346	7.6052	7.87048	7.78295	NaN	21.592
TGVEG_280560;TGME49_280560;TGGT1_280560	selenide, water dikinase	N/A	0	NaN	NaN	NaN	25.461	NaN			2.5945e-10	4	2.9	1	0	2	1	8.12215	7.6229	NaN	7.80754	7.42015	137.67
TGVEG_280600;TGME49_280600;TGGT1_280600	histidyl-tRNA synthetase (HisRS), putative;putative histidyl-tRNA synthetase (HisRS)	N/A	0	-0.0177984	29.1937	29.0387	29.0623	29.1345			7.9049e-38	30	11.5	8	9	10	7	9.43946	8.75226	8.86975	8.94692	8.74792	134.86
TGVEG_280610;TGME49_280610;TGGT1_280610	signal recognition particle receptor alpha subunit	HMM: MIDAICAFSRGGVVLWSFCFAKVPSS, NN: MIDAICAFSRGGVVLWSFCFAK	0	NaN	NaN	NaN	25.7343	NaN			5.9679e-14	7	9.9	1	2	2	2	8.32338	7.41005	7.88303	7.88981	7.48965	60.714
TGVEG_280710;TGME49_280710;TGGT1_280710	20S proteasome subunit beta 7, putative;putative 20S proteasome subunit beta 7	N/A	0	-0.0112123	29.2102	29.0947	29.0983	29.1842			1.3294e-28	23	22.9	4	5	6	5	9.44782	8.76527	8.89913	8.89818	8.80487	30.279
TGVEG_280740;TGME49_280740;TGGT1_280740	signal peptidase	N/A	1	0.132959	NaN	25.0385	NaN	25.1715			4.5502e-08	7	9.9	1	2	2	2	8.33453	7.07762	7.62637	8.0807	7.61661	24.664
TGVEG_281040;TGME49_281040;TGGT1_281040;TGGT1_411060	hypothetical protein	N/A	0	NaN	NaN	NaN	NaN	27.1892			0.0070328	12	6.1	1	1	1	1	8.8111	8.05526	8.21553	8.27068	8.26233	14.041
TGVEG_281630;TGME49_281630;TGGT1_281630	hydroxyacylglutathione hydrolase	HMM: MQPKALLSLASVCPSSPMGRASLSSCSFSPSPLQFSRGASSLFASSLLCAPASSAS, NN: MQPKALLSLASVCPSSPMGRAS;HMM: MQPKALLSLASVCPSSSMGRASLSSCSFSPSPLQFSRGASSLFASSLLCAPASSAS, NN: MQPKALLSLASVCPSSSMGRAS;HMM: MQPKALLSLASVCPSSSMGRASLSSCSFSPSPLQFSRGASSLLASSLLCAPASSAS, NN: MQPKALLSLASVCPSSSMGRAS	0	NaN	NaN	NaN	NaN	24.2694			0.00016767	3	2.4	1	1	0	1	7.89649	7.2154	7.60683	NaN	7.34108	48.12
TGVEG_282055;TGGT1_282055;TGME49_282055	protein phosphatase PP2C-hn	N/A	0	-0.0104752	27.207	27.6653	27.4577	27.3937			3.0736e-22	14	14	4	2	3	4	8.93062	8.27878	8.25003	8.40668	8.36063	51.909
TGVEG_282170;TGME49_282170;TGGT1_282170	hypothetical protein	N/A	0	NaN	NaN	26.3582	NaN	NaN			0.00093856	2	3.3	1	1	0	0	8.13859	7.49018	8.02804	NaN	NaN	61.256
TGVEG_282180;TGME49_282180;TGGT1_282180	hypothetical protein	N/A	0	NaN	NaN	NaN	26.3508	NaN			3.94e-10	4	12.9	1	1	2	1	8.48531	7.12872	7.94235	8.0754	7.93312	35.195
TGVEG_283510;TGGT1_283510;TGME49_283510	hypothetical protein	N/A	0	-0.559535	27.0142	26.3186	26.2184	25.9955			3.5851e-32	9	14.3	3	2	3	3	8.61769	8.22045	7.88809	8.03834	7.7925	34.699
TGVEG_283540;TGME49_283540;TGGT1_283540	hypothetical protein	HMM: MHTKMMDGAKLYRRSMTTATTTGFFLLACWFLPSSCIQGSEAL, NN: MHTKMMDGAKLYRRSMTTATTTGFFLLACWFLPSSCIQGSEAL;HMM: MHTKMTDGAKLYRRSMTTATTTGFFLLACWFLPSSCIQGSEAL, NN: MHTKMTDGAKLYRRSMTTATTTGFFLLACWFLPSSCIQGSEAL	0	-0.106675	28.1591	28.2072	27.9657	28.1872			2.9258e-20	17	21	4	5	3	4	9.13561	8.43919	8.65332	8.40938	8.58529	41.945
TGVEG_283850;TGME49_283850;TGGT1_283850	peptidyl-prolyl cis-trans isomerase	N/A	0	-0.0748396	30.0996	29.9956	29.9948	29.9507			6.102e-48	45	29.4	9	12	10	11	9.70711	9.00281	9.21917	9.10116	9.06796	55.575
TGVEG_284540;TGME49_284540;TGGT1_284540	ATP synthase F1, delta subunit protein	N/A	0	-0.101453	29.1841	29.2274	29.1068	29.1018		+	3.7421e-25	24	27.4	6	5	6	6	9.45019	8.78742	8.86521	8.92367	8.80251	27.635
TGVEG_284560;TGME49_284560;TGGT1_284560	ribosomal protein RPL9	N/A	0	-0.00956821	31.5029	31.6128	31.5775	31.5192			1.2416e-52	40	60	8	5	7	5	10.1692	9.52238	9.61581	9.58889	9.53477	21.424
TGVEG_285180;TGME49_285180;TGGT1_285180	hypothetical protein;S1/P1 nuclease	HMM: MVCLRHWWLWLSVVTFGAGSVNRVKAW, NN: MVCLRHWWLWLSVVTFGAGSVNRVKAW	1	NaN	NaN	NaN	25.2757	NaN			1.136e-07	6	4.3	1	2	2	1	8.10605	7.39159	7.46174	7.75176	7.24569	69.784
TGVEG_285240;TGME49_285240;TGGT1_285240	3-oxo-5-alpha-steroid 4-dehydrogenase	HMM: MRLQIVATTALFLGRVQVFAV, NN: MRLQIVATTALFLGRVQVFAV	4	-0.145356	27.4147	27.5742	27.3214	27.3768			5.036e-08	12	7.2	3	3	3	3	8.9246	8.33969	8.34494	8.35409	8.24234	40.101
TGVEG_285720;TGGT1_285720;TGME49_285720	ATP binding protein, putative;putative ATP binding protein	HMM: METSSPSSSSSLPISSPPLSSPLLSSSSSSSSSSSSSSSSSPSSSPSSSSSSSSSSSSSSSS, NN: METSSPSSSSSLPISSPPLSSPLLSSSSSS;HMM: METSSPSSSSSLPISSPPLSSPLLSSSSSSSSSSSSSSSSSSSSSSSSSSSSSSSSSSSSSTTSS, NN: METSSPSSSSSLPISSPPLSSPLLSSSSSS;HMM: SSSARSAVVVVIVGMAGSG, NN: SSSARSAVVVVIVGMAGSG	0	NaN	NaN	NaN	NaN	24.3433			5.9765e-05	4	3	1	1	1	1	7.91157	7.2276	7.3216	7.31456	7.36333	39.497
TGVEG_285760;TGME49_285760;TGGT1_285760	U-snRNP-associated cyclophilin family protein	N/A	0	-0.0962677	NaN	27.1007	NaN	27.0044			4.1409e-14	9	28.9	2	5	1	2	8.69012	7.93404	8.40202	7.84666	7.91058	22.971
TGVEG_286090;TGME49_286090;TGGT1_286090;TGVEG_249370;TGME49_249370;TGGT1_249370	putative translation initiation factor SUI1;translation initiation factor SUI1, putative	N/A	0	-0.257451	27.7859	27.3368	27.3496	27.2582			4.2594e-44	10	48.2	3	2	3	2	8.92774	8.47777	8.225	8.41143	8.08099	12.483
TGVEG_286120;TGGT1_286120;TGME49_286120	prolyl endopeptidase	HMM: MLTSWLSVRCCSLIHIGGGR, NN: MLTSWLSVRCCSLIHIGGGR;HMM: MLTTWLSVRCCSLIHIGEGR, NN: MLTTWLSVRCCSLIHIGEGR	0	0.071331	29.9693	30.0982	30.343	29.8672			1.2075e-81	72	31.3	13	16	13	15	9.73648	8.92657	9.19857	9.25837	9.08418	93.097
TGVEG_286160B;TGVEG_286160C;TGGT1_286160B;TGME49_286160	non-specific serine/threonine protein kinase	N/A	0	NaN	22.9035	NaN	NaN	NaN			0.00061337	1	2.1	1	0	0	0	6.89465	6.89465	NaN	NaN	NaN	108.62
TGVEG_286440;TGME49_286440;TGGT1_286440	malic enzyme	N/A	0	NaN	NaN	NaN	NaN	23.1093			2.4249e-05	2	5.7	0	1	0	1	6.99187	NaN	NaN	NaN	6.99187	41.85
TGVEG_286530;TGGT1_286530;TGME49_286530	hypothetical protein;putative transmembrane protein	HMM: MMAMSSGASALRLGCRAAPAFFCLSHRRLMFAAAPLQSF, NN: MMAMSSGASALRLGCRAA	1	-0.101393	NaN	26.765	26.5871	26.7401			4.499e-10	7	15.1	1	3	3	2	8.68517	7.88013	8.22123	8.17684	7.9628	25.436
TGVEG_286560;TGME49_286560;TGGT1_286560	U6 snRNA-associated Sm family protein	N/A	0	NaN	NaN	25.4691	NaN	NaN			0.00037692	4	33.3	1	2	1	0	8.05477	7.11774	7.76041	7.63074	NaN	10.871
TGVEG_286630;TGME49_286630;TGGT1_286630	redoxin domain-containing protein	HMM: MNKRVYRFFSHSAGFKQTKFLLMTKTMAKALCCTATMATLALLATVLLGNLPAGSFSF, NN: MNKRVYRFFSHSAGFKQTKFLLMTKTMAKALCCTATMATLALLATVLLGNLPAGSFSF;HMM: MNKRVYRFFSHSAGFKQTKFLLMTKTMAKALCCTATMATVALLATVLLGNLPAGSFSF, NN: MNKRVYRFFSHSAGFKQTKFLLMTKTMAKALCCTATMATVALLATVLLGNLPAGSFSF	1	-0.0867414	29.1085	29.2206	29.2003	28.9552			5.6023e-37	33	33.6	6	5	5	5	9.44781	8.81206	8.93014	8.94385	8.6287	31.121
TGVEG_286720;TGME49_286720;TGGT1_286720	heat shock protein HSP28	N/A	0	-0.0528021	NaN	27.6237	27.6325	27.5092			1.6999e-41	11	33	1	5	3	5	8.90932	7.79413	8.41449	8.43331	8.33923	31.035
TGVEG_286730;TGME49_286730;TGGT1_286730	SRP19 protein	N/A	0	NaN	NaN	NaN	23.2815	NaN			0.0045669	1	7	0	0	1	0	7.15146	NaN	NaN	7.15146	NaN	23.333
TGVEG_286750;TGME49_286750;TGGT1_286750	MA3 domain-containing protein	N/A	0	NaN	NaN	NaN	NaN	25.5342			2.1281e-05	5	3.9	1	1	1	2	8.10486	7.20734	7.404	7.5203	7.72184	58.969
TGVEG_287210;TGME49_287210;TGGT1_287210	proteasome subunit alpha2, protease of the acylase family and NTN hydrolase fold, putative;putative proteasome subunit alpha2;putative proteasome subunit alpha2, protease of the acylase family and NTN hydrolase fold	N/A	0	-0.0675058	29.6776	29.537	29.5207	29.5588			5.3445e-29	25	30.1	5	7	7	6	9.57748	8.8926	8.97457	9.07033	8.94449	25.867
TGVEG_287270;TGME49_287270;TGGT1_287270	hypothetical protein;putative transmembrane protein	N/A	1	NaN	NaN	24.0408	NaN	NaN			0.0027869	1	1.6	0	1	0	0	7.33043	NaN	7.33043	NaN	NaN	75.169
TGVEG_287500;TGGT1_287500;TGME49_287500	putative T complex chaperonin;T complex chaperonin, putative	N/A	0	-0.205156	30.4339	30.5082	30.2264	30.3054			8.6993e-80	70	49.1	19	16	18	13	9.81476	9.25005	9.26057	9.27976	9.00979	59.362
TGVEG_288245;TGME49_288245;TGGT1_288245	hypothetical protein;putative transmembrane protein	HMM: MFALQDAEQLQLQRMMQEKFVKRLRAFAVFVAALRALPIVVSI, NN: MFALQDAEQLQLQRMMQEKFVKRLRAFAVFVAALRAL	1	NaN	23.957	NaN	NaN	NaN			0.00041875	1	19.2	1	0	0	0	7.21176	7.21176	NaN	NaN	NaN	5.8829
TGVEG_288360;TGGT1_288360;TGME49_288360	tryptophanyl-tRNA synthetase;tryptophanyl-tRNA synthetase (TrpRS2)	HMM: MFFLSTSVIPGAAVFSVRFAR, NN: MFFLSTSVIPGAAVFSVRFAR;N/A	0	-0.0400009	31.7706	31.7547	31.6484	31.7968			1.5839e-129	120	39.6	18	21	21	20	10.2307	9.50442	9.68138	9.68999	9.61433	77.003
TGVEG_288380;TGME49_288380;TGGT1_288380	heat shock protein HSP90	N/A	0	-0.0879021	33.7938	33.8952	33.7713	33.7419			0	325	55.1	37	37	38	39	10.876	10.2004	10.3294	10.3422	10.2031	81.932
TGVEG_288630;TGME49_288630;TGGT1_288630	nucleosome assembly protein (NAP), putative;putative nucleosome assembly protein (NAP)	N/A	0	-0.193664	29.91	30.3207	29.9425	29.9008			7.3726e-56	36	32	7	9	9	8	9.72276	8.84271	9.26413	9.2086	9.05373	32.081
TGVEG_288650;TGME49_288650;TGGT1_288650	dense granule protein GRA12	HMM: MRAIMASTQQFLRPVGSRPLAGISVVVVVALAIALGTAA, NN: MRAIMASTQQFLRPVGSRPLAGISVVVVVALAIALGTAA;HMM: MRAIVASTQQFLRPVGSRPLAGISIVVVVALAIALGTAA, NN: MRAIVASTQQFLRPVGSRPLAGISIVVVVALAIALGTAA	1	-0.264044	34.6419	34.5714	34.3575	34.3278			2.9253e-153	300	53.4	21	18	19	20	11.0792	10.4669	10.5174	10.4992	10.4186	47.955
TGVEG_288680;TGME49_288680;TGGT1_288680	endonuclease IV APN	HMM: MHLSSLILVLALASLCRPVISK, NN: MHLSSLILVLALASLCRPVISK	0	NaN	NaN	25.5728	NaN	NaN			0.0002096	2	3.3	0	1	1	0	7.86276	NaN	7.79161	7.04206	NaN	72.273
TGVEG_288720;TGME49_288720;TGGT1_288720	ribosomal protein RPL10	N/A	0	-0.00670719	30.9857	31.4915	31.1906	31.2732			2.0521e-60	70	43.4	6	7	8	6	10.0978	9.34386	9.60979	9.54623	9.436	24.801
TGVEG_288750;TGME49_288750;TGGT1_288750	ubiquinol-cytochrome c reductase	N/A	0	0.228632	27.9937	28.4578	28.3604	28.5483			8.0911e-46	20	34.6	5	4	4	4	9.22528	8.56737	8.63718	8.65641	8.62699	26.741
TGVEG_288830;TGME49_288830;TGGT1_288830	NADH dehydrogenase (NDH2-II)	HMM: MAMLFSSSAAGSLPSRRSRSVAAKLAPFASPIFSS, NN: MAMLFSSSAAGSLPSRRSRSVAAKLAPFASPIFSS;HMM: MAMLFSSSAAGSLPSRRSRSVAAKLAPFASPIFSSPLLKQGA, NN: MAMLFSSSAAGSLPSRRSRSVAAKLAPFASPIFSS	0	-0.288175	27.269	27.4131	27.0529	NaN			1.2886e-11	9	11.3	2	4	3	3	8.87478	7.98412	8.47973	8.28883	8.19546	72.123
TGVEG_288860;TGME49_288860;TGGT1_288860	RuvB family 2 protein	N/A	0	NaN	26.0585	NaN	NaN	NaN			7.0553e-14	3	12.8	2	0	1	1	8.30492	7.84438	NaN	7.46016	8.01313	55.446
TGVEG_289530;TGME49_289530;TGGT1_289530	ribosomal protein RPL19	N/A	0	-0.244184	31.3581	31.3965	31.0126	31.2537		+	1.381e-35	48	33.2	6	7	6	6	10.0855	9.4454	9.55235	9.48103	9.44623	22.16
TGVEG_289540;TGME49_289540;TGGT1_289540	hypothetical protein	HMM: MSHKTMAKSGGRSTGAVRSHDAGSPSAPVASKSRPWRLGCMVVSLAAFAVAIST, NN: MSHKTMAKSGGRSTGAVRSHDAGSPSAPVASKSRPWRLGCMVVSLAAFAVAI	0	-0.185114	28.5782	28.3534	28.2813	28.2801			5.3562e-70	25	19.4	7	7	8	6	9.21421	8.60947	8.69607	8.63923	8.47464	100.59
TGVEG_289580;TGGT1_289580;TGME49_289580	strictosidine synthase subfamily protein	HMM: MKFVAVLFPVGAAVLLD, NN: MKFVAVLFPVGAAVLL	1	-0.0808859	NaN	27.297	27.3577	27.0746			1.5946e-23	8	12.9	0	4	3	4	8.78168	NaN	8.40731	8.39199	8.01216	49.46
TGVEG_289600;TGME49_289600;TGGT1_289600	heat shock protein HSP29	N/A	0	-0.386478	27.8535	27.9324	27.6553	27.3577			2.0472e-20	12	18.8	4	3	3	2	9.00749	8.55166	8.49714	8.3697	8.05227	29.649
TGVEG_289620;TGME49_289620;TGGT1_289620	cathepsin CPC1	HMM: MEGMGSLRRRCAALPLVAGFLVFLGSIGVKAD, NN: MEGMGSLRRRCAALPLVAGFLVFLGSIGVKAD	1	NaN	24.4393	NaN	NaN	NaN			0.00022296	1	1.9	1	0	0	0	7.35696	7.35696	NaN	NaN	NaN	79.219
TGVEG_289650;TGME49_289650;TGGT1_289650	PEP-carboxykinase I	N/A	0	0.293584	29.6531	29.9047	30.1521	29.9929			2.1329e-69	54	22.9	10	9	11	9	9.68983	8.97273	9.06209	9.22858	9.04548	75.342
TGVEG_289680;TGME49_289680;TGGT1_289680	Ras-related protein Rab11	N/A	0	-0.00750923	30.1383	30.1482	30.1208	30.1507			6.7409e-52	51	55.7	10	11	10	10	9.7462	9.08789	9.18929	9.17205	9.11985	24.996
TGVEG_289690;TGME49_289690;TGGT1_289690	glyceraldehyde-3-phosphate dehydrogenase GAPDH1	N/A	0	-0.16584	33.2675	33.1601	33.0923	33.0036			1.3462e-217	172	51.7	17	20	20	19	10.6682	10.0039	10.1122	10.1534	9.96862	53.339
TGVEG_289750;TGME49_289750;TGGT1_289750;TGVEG_219820;TGGT1_219820;TGME49_219820	polyubiquitin UbC, putative;putative polyubiquitin UbC;ribosomal-ubiquitin protein RPL40	N/A	0	-0.002882	29.5693	28.3973	28.9804	NaN			2.3123e-39	13	44.2	2	2	2	1	9.36431	8.90099	8.66576	8.85071	8.53813	14.685
TGVEG_289770;TGME49_289770;TGGT1_289770	mu1 adaptin	N/A	0	NaN	NaN	25.9636	NaN	NaN			5.1234e-10	5	9.3	1	2	1	1	8.29017	7.23226	7.90928	7.69898	7.67058	48.916
TGVEG_289800;TGME49_289800;TGGT1_289800	emp24/gp25L/p24 family protein;hypothetical protein	HMM: MSVSQLTASRRSSRGSRGLCSCPRSFLLFALGLGLASLALTPPAAAF, NN: MSVSQLTASRRSSRGSRGLCSCPRSFLLFALGLGLASLALTPPAAAF	2	-0.0531178	NaN	27.6342	27.581	NaN			1.0732e-08	9	13.2	1	2	2	2	8.91135	7.99649	8.41223	8.44567	8.25227	25.883
TGVEG_289830;TGME49_289830;TGGT1_289830	eukaryotic initiation factor-3, delta subunit, putative;putative eukaryotic initiation factor-3, delta subunit	N/A	0	-0.0794029	29.3229	29.6415	29.2823	29.5234			6.0278e-39	28	40.9	8	6	7	5	9.54995	8.71079	9.05641	9.08408	8.83353	37.766
TGVEG_289940;TGME49_289940;TGGT1_289940	uroporphyrinogen decarboxylase	N/A	1	NaN	26.5382	NaN	NaN	NaN			0.0027052	1	2	1	0	0	0	7.98879	7.98879	NaN	NaN	NaN	73.81
TGVEG_290030;TGME49_290030;TGGT1_290030	hypothetical protein;putative transmembrane protein	HMM: MGLSPAFAATAGCRLAS, NN: MGLSPAFAATAGCRLASPVANSSRFLSLLRLSRPRLNAA	1	0.265827	26.832	27.5151	27.389	27.4898			1.2304e-15	12	24.9	3	3	5	3	8.91537	8.01511	8.37411	8.49952	8.22243	26.593
TGVEG_290040;TGME49_290040;TGGT1_290040	macrophage migration inhibitory factor, putative;putative macrophage migration inhibitory factor	HMM: MPKCMIFCPVAATPAQQD, NN: MPKCMIFCPVAAT	0	0.49396	27.9083	28.539	28.8904	28.5449			1.1756e-33	19	50.9	2	4	4	3	9.2994	8.39224	8.77581	8.91643	8.51063	12.254
TGVEG_290160;TGME49_290160;TGGT1_290160	putative sortilin;sortilin, putative	HMM: MYTSRTPHGGLRRWPLSRSSVSAVASRVLSRSVAFHRRLASFLLSRKKTPLCALSSRPSGLQAS, NN: MYTSRTPHGGLRRWPLSRSSVSAVASRVLSRSVAF	1	-0.062355	28.6956	29.1298	28.8874	28.8133			8.7632e-52	40	15.7	9	9	10	8	9.37164	8.75536	8.74707	8.89466	8.64401	113.58
TGVEG_290600;TGME49_290600;TGGT1_290600	succinyl-CoA-synthetase alpha SCSA	N/A	0	-0.385354	29.3137	29.3555	28.9902	28.9083			2.3766e-25	35	29.7	6	5	5	8	9.451	8.85277	8.87647	8.84664	8.8179	35.09
TGVEG_290660;TGGT1_290660;TGME49_290660	RNA recognition motif-containing protein	N/A	0	-0.102016	30.1237	30.13	30.0484	30.0013			3.0595e-113	51	31.2	7	8	7	8	9.73077	9.09015	9.19053	9.1586	9.06356	48.352
TGVEG_290670;TGGT1_290670;TGME49_290670	leucyl aminopeptidase LAP	HMM: MVPPSPGASCLLSRTRQRNVLPLACSLCLYTVTVCSAL, NN: MVPPSPGASCLLSRTRQRNVLPLACSLCLYTVTVCSAL;HMM: MVPPTPGASCLLSRTRQRNVLPLACSLCLYTVTVCSAL, NN: MVPPTPGASCLLSRTRQRNVLPLACSLCLYTVTVCSAL	0	0.010663	31.2528	31.3607	31.348	31.2868			1.5673e-122	95	40.3	23	17	21	16	10.1046	9.47265	9.47643	9.64026	9.3784	83.189
TGVEG_290850;TGME49_290850;TGGT1_290850	WD-40 repeat protein	N/A	0	NaN	NaN	NaN	23.4446	NaN			0.0005708	1	1.9	0	0	1	0	7.20052	NaN	NaN	7.20052	NaN	58.308
TGVEG_290950;TGME49_290950;TGGT1_290950	clathrin heavy chain, putative;putative clathrin heavy chain	N/A	0	-0.108674	30.9845	31.0282	30.8269	30.9685			2.3207e-214	121	29.2	29	31	29	28	9.98853	9.3166	9.47175	9.37335	9.3694	194.47
TGVEG_290980;TGME49_290980;TGGT1_290980	glycine C-acetyltransferase, putative;putative glycine C-acetyltransferase	N/A	0	NaN	NaN	25.948	NaN	NaN			2.8454e-10	4	9.5	1	4	1	0	8.05843	7.36451	7.90457	7.04076	NaN	63.65
TGVEG_291140;TGME49_291140;TGGT1_291140	CCR4-Not complex component, Not1 protein	N/A	0	NaN	NaN	NaN	23.3863	NaN			0.00085544	1	0.4	0	0	1	0	7.18298	NaN	NaN	7.18298	NaN	265.91
TGVEG_291300;TGME49_291300;TGGT1_291300	putative RER1 protein;RER1 protein, putative	N/A	2	NaN	NaN	NaN	NaN	26.7094			2.0742e-17	4	19.4	0	1	1	2	8.24935	NaN	7.66914	7.07441	8.07558	25.35
TGVEG_291330;TGME49_291330;TGGT1_291330	RNA recognition motif-containing protein	N/A	0	NaN	NaN	26.597	NaN	NaN			0.00011228	5	14.5	1	2	1	1	8.46814	7.44875	8.09996	7.95739	7.69221	25.512
TGVEG_291630;TGME49_291630;TGGT1_291630	hypothetical protein	N/A	0	NaN	NaN	27.3161	NaN	NaN			2.4577e-08	4	15.7	1	3	1	1	8.59662	7.75526	8.31641	7.73176	7.88631	25.641
TGVEG_291640;TGME49_291640;TGGT1_291640	aspartate carbamoyltransferase	N/A	0	NaN	NaN	NaN	24.8797	NaN			0.00038158	3	2.4	1	1	1	0	7.91001	7.25522	7.30914	7.63256	NaN	46.921
TGVEG_291680;TGME49_291680;TGGT1_291680	Sec23/Sec24 trunk domain-containing protein	N/A	0	-0.0645609	28.657	28.5143	28.5384	28.5037			3.2296e-51	26	17.3	4	7	9	7	9.27882	8.44281	8.69536	8.83715	8.64337	87.609
TGVEG_291850;TGME49_291850;TGGT1_291850	ribosomal protein RPS30	N/A	0	-0.0836315	27.4932	NaN	NaN	27.4096			1.3071e-05	6	28.8	2	1	1	2	8.8145	8.27568	8.11922	8.14142	8.287	6.5996
TGVEG_292130;TGME49_292130;TGGT1_292130	ribosomal protein RPL13A	N/A	0	-0.127209	32.1745	31.8989	31.9319	31.8871			1.4311e-58	79	35.7	10	10	9	10	10.3175	9.73838	9.72381	9.74433	9.6487	32.749
TGVEG_292320;TGME49_292320;TGGT1_292320	hypothetical protein;queuine tRNA-ribosyltransferase	N/A	0	NaN	NaN	NaN	31.4323	NaN			0.0043425	10	0.9	1	1	1	1	9.87352	NaN	9.53723	9.6051	NaN	97.836
TGVEG_292920;TGME49_292920;TGGT1_292920	heat shock protein 75, putative;putative heat shock protein 75	N/A	0	-0.165271	28.8507	28.8914	28.6782	28.7333			1.8005e-33	22	16	5	7	8	6	9.35106	8.37645	8.83178	8.87351	8.76347	95.158
TGVEG_293180;TGME49_293180;TGGT1_293180	NADP-specific glutamate dehydrogenase	N/A	0	-0.0243998	30.7061	30.5881	30.5687	30.6767			1.6925e-104	69	33.6	10	12	13	14	9.89757	9.15363	9.32615	9.33632	9.33967	63.798
TGVEG_293250;TGME49_293250;TGGT1_293250	hypothetical protein	N/A	0	NaN	NaN	NaN	NaN	26.7748			0.0066575	4	0.6	1	1	1	1	8.83468	8.367	8.14016	8.27409	8.09531	155.44
TGVEG_293340;TGME49_293340;TGGT1_293340	putative ran binding family protein 1;ran binding family protein 1, putative	N/A	0	-0.0826092	29.1603	29.3796	29.2196	29.1551			3.5551e-40	19	25.9	4	5	5	5	9.47645	8.72536	8.94534	8.94848	8.84149	24.292
TGVEG_293360;TGME49_293360;TGGT1_293360	hypothetical protein	N/A	0	NaN	NaN	NaN	NaN	26.1593			1.826e-06	3	8.6	0	2	1	2	8.34355	NaN	8.08771	7.2283	7.90999	26.752
TGVEG_293430;TGME49_293430;TGGT1_293430	hypothetical protein;putative transmembrane protein	N/A	4	-0.431	NaN	26.869	NaN	26.438			9.021e-09	6	7.8	1	2	1	2	8.52983	7.63923	8.19571	7.64264	7.97448	44.583
TGVEG_293440;TGME49_293440;TGGT1_293440	hypothetical protein;putative transmembrane protein	N/A	4	0.107107	NaN	26.2723	26.3794	NaN			2.8537e-11	5	5.9	1	2	2	0	8.4204	7.63199	8.05034	8.03391	NaN	58.737
TGVEG_293510;TGME49_293510;TGGT1_293510	poly(ADP-ribose) polymerase and DNA-Ligase Zn-finger region domain-containing protein	HMM: MSRLKLTTGFISVIRPIVSL, NN: MSRLKLTTGFISVIRPIVSL	0	NaN	NaN	24.3297	NaN	NaN			0.00040976	1	3.1	0	1	0	0	7.41742	NaN	7.41742	NaN	NaN	43.837
TGVEG_293570;TGGT1_293570;TGME49_293570	putative translocation protein sec62;translocation protein sec62, putative	N/A	2	0.177107	26.7685	27.6267	27.4221	27.3273			7.3359e-18	14	18.2	2	3	4	4	8.89992	7.97907	8.17574	8.41415	8.46166	44.899
TGVEG_293580;TGME49_293580;TGGT1_293580	prefoldin subunit protein	N/A	0	0.323061	26.1585	NaN	26.4816	NaN			1.0969e-13	7	30.6	3	1	2	2	8.49703	7.89068	NaN	8.10137	8.04151	18.345
TGVEG_293590;TGME49_293590;TGGT1_293590	3-oxoacyl-acyl-carrier protein synthase I/II, putative;putative 3-oxoacyl-acyl-carrier protein synthase I/II	HMM: MNPALLDRRLLSKLPSLVSVLTFLLSVFIFSPAHAL, NN: MNPALLDRRLLSKLPSLVSVLTFLLSVFIFSPAHAL	1	NaN	NaN	NaN	NaN	24.3748			1.9668e-05	1	3.6	0	0	0	1	7.3728	NaN	NaN	NaN	7.3728	58.394
TGVEG_293630;TGME49_293630;TGGT1_293630	arsenite-resistance protein 2;hypothetical protein	N/A	0	NaN	NaN	NaN	NaN	23.6013			6.1646e-05	3	2.1	1	1	1	1	7.91221	7.49989	NaN	7.55966	7.13994	89.575
TGVEG_293690;TGME49_293690;TGGT1_293690	profilin PRF	N/A	0	-0.563532	31.8034	30.8605	31.036	30.5009			2.6966e-129	41	70.9	8	6	6	5	10.0451	9.55549	9.42826	9.53518	9.14358	17.741
TGVEG_293710;TGME49_293710;TGGT1_293710	Zn-finger in Ran binding protein and others domain-containing protein	N/A	0	NaN	NaN	22.8349	NaN	NaN			0.0010548	1	1.5	0	1	0	0	6.96744	NaN	6.96744	NaN	NaN	70.603
TGVEG_293770;TGME49_293770;TGGT1_293770	chitinase-like protein CLP1	HMM: MCPRVSVDAVTVLGTALLLCLEGTRLS, NN: MCPRVSVDAVTVLGTALLLCLEGTRLS	0	NaN	26.2151	27.1039	NaN	NaN			3.5835e-15	6	7.8	3	3	0	0	8.40683	7.92712	8.232	NaN	NaN	74.942
TGVEG_293860;TGME49_293860;TGGT1_293860	CS domain protein;hypothetical protein	N/A	0	NaN	NaN	NaN	23.4491	NaN			0.00132	1	7.7	0	0	1	0	7.20192	NaN	NaN	7.20192	NaN	25.454
TGVEG_293870;TGME49_293870;TGGT1_293870	putative thioredoxin;thioredoxin, putative	N/A	0	0.0181007	31.5632	31.9108	31.5687	31.9414			1.2219e-76	67	66	7	8	7	7	10.2612	9.59178	9.73156	9.66003	9.64158	12.036
TGVEG_294200;TGME49_294200;TGGT1_294200	glucose-6-phosphate 1-dehydrogenase	HMM: MAPENGRSSYSAYIRLLWLLTAVTAASAL, NN: MAPENGRSSYSAYIRLLWLLTAVTAASAL	1	0.165154	31.9647	32.2804	32.2865	32.2889			1.1282e-183	160	64.5	23	24	26	24	10.3805	9.64466	9.83613	9.87768	9.71624	62.736
TGVEG_294240;TGME49_294240;TGGT1_294240	hypothetical protein;putative transmembrane protein	HMM: MARLGGLALARAAPPRPVLCRHVLSLLTLALLSTGSAE, NN: MARLGGLALARAAPPRPVLCRHVLSLLTLALLSTGSAE	2	NaN	NaN	NaN	25.9149	NaN			0.0058107	2	0.5	0	1	1	0	8.24738	NaN	7.94851	7.94418	NaN	170.78
TGVEG_294350;TGME49_294350;TGGT1_294350	DEAD/DEAH box helicase domain-containing protein	N/A	0	0.188584	28.0175	28.4468	28.2976	28.5439			1.2396e-49	35	9.9	11	9	12	9	9.21008	8.48916	8.56277	8.76695	8.56053	273.73
TGVEG_294610;TGME49_294610;TGGT1_294610	histone lysine methyltransferase, SET, putative;putative histone lysine methyltransferase, SET	N/A	0	NaN	NaN	23.9929	NaN	NaN			0.0037684	1	0.9	0	1	0	0	7.31601	NaN	7.31601	NaN	NaN	189.75
TGVEG_294620;TGME49_294620;TGGT1_294620	eukaryotic initiation factor-3, subunit 8, putative;putative eukaryotic initiation factor-3, subunit 8	N/A	0	-0.127349	30.9679	31.0648	30.8975	30.8806			1.317e-161	101	31.1	23	21	23	18	9.99127	9.37212	9.46644	9.44034	9.24598	109.19
TGVEG_294640;TGME49_294640;TGGT1_294640	ribonucleoside-diphosphate reductase large chain	N/A	0	0.0450554	28.0735	28.3379	28.2066	28.2949			1.759e-29	29	13.2	5	7	7	7	9.17722	8.33306	8.65075	8.65167	8.59413	98.178
TGVEG_294670;TGME49_294670;TGGT1_294670	translation initiation factor 3 subunit	N/A	0	-0.133372	30.0989	30.0074	29.9885	29.8511			7.6187e-67	46	49.8	7	9	9	8	9.69949	9.08397	9.11641	9.16498	9.00996	31.812
TGVEG_294710;TGME49_294710;TGGT1_294710	RNA recognition motif-containing protein	N/A	0	NaN	NaN	NaN	NaN	26.4234			2.0338e-08	6	3.9	1	1	0	3	8.30535	7.60659	7.80593	NaN	7.98952	122.11
TGVEG_294770;TGME49_294770;TGGT1_294770	Armadillo/beta-catenin family repeat-containing protein	HMM: MSATSAFSSGAASGSGPLSLTLTGRPGAAVGS, NN: MSATSAFSSGAASGSGPLSLTLTGRPGAAVGS	0	NaN	NaN	25.2813	NaN	NaN			7.9293e-06	4	2.8	0	2	1	1	7.88799	NaN	7.70387	7.17167	7.07379	74.144
TGVEG_294790;TGME49_294790;TGGT1_294790	hypothetical protein	N/A	0	NaN	NaN	NaN	NaN	27.3948			7.7557e-07	7	12	1	1	2	2	8.66635	7.53138	7.79002	8.24741	8.28192	37.699
TGVEG_294800;TGVEG_286420;TGME49_294800;TGME49_286420;TGGT1_286420A;TGGT1_294800A;TGGT1_294800B;TGGT1_359490;TGGT1_286420B	elongation factor 1-alpha;elongation factor 1-alpha (EF-1-ALPHA), putative;putative elongation factor 1-alpha (EF-1-ALPHA)	N/A	0	-0.0274105	36.7163	36.5868	36.5583	36.6899			0	1035	82.1	32	37	33	34	11.7415	11.083	11.1658	11.1891	11.1118	49.005
TGVEG_294898;TGME49_294898;TGGT1_294898	tetratricopeptide repeat-containing protein	N/A	0	0.0803947	26.83	26.6451	26.8809	26.7551			1.2585e-34	8	7.1	3	2	3	2	8.73269	8.14323	8.01368	8.25025	8.0798	88.632
TGVEG_295040;TGME49_295040;TGGT1_295040	HEAT repeat-containing protein	N/A	0	0.251646	26.8513	26.9024	NaN	27.1285			5.1813e-29	11	9.8	3	4	1	5	8.68938	7.75316	8.32052	7.61435	8.26033	104.59
TGVEG_295125;TGGT1_295125;TGME49_295125	rhoptry protein ROP4	HMM: MGHPTSFGQPSCLVWLAAAFLVLGLCLVQQGAGI, NN: MGHPTSFGQPSCLVWLAAAFLVLGLCLVQQGAGI;HMM: MGHPTSFGQPSCLVWLAAAFLVLGLCLVQQGAGR, NN: MGHPTSFGQPSCLVWLAAAFLVLGLCLVQQGAGR	1	-0.099885	29.8202	30.108	29.774	29.9545			4.2602e-57	27	41.6	4	4	4	4	9.68047	8.95756	9.15278	9.10941	9.07059	40.181
TGVEG_295340;TGME49_295340;TGGT1_295340	UV excision repair protein Rad23 protein	N/A	0	NaN	NaN	NaN	NaN	25.2524			0.0044032	4	2.4	1	1	1	1	8.13319	7.22243	7.61643	7.53789	7.637	39.739
TGVEG_295350;TGME49_295350;TGGT1_295350	nucleoside diphosphate kinase, putative;putative nucleoside diphosphate kinase	N/A	0	-0.0755444	31.7211	31.7784	31.741	31.6074			2.1095e-67	66	49.7	7	8	8	8	10.2247	9.59359	9.66812	9.68811	9.52098	17.639
TGVEG_295710;TGGT1_295710;TGME49_295710	HECT-domain (ubiquitin-transferase) domain-containing protein	N/A	0	NaN	NaN	NaN	22.2284	NaN			9.922e-05	1	0.3	1	0	2	0	6.95291	6.33086	NaN	6.83443	NaN	841.31
TGVEG_295730;TGME49_295730;TGGT1_295730	tetratricopeptide repeat-containing protein	N/A	0	NaN	NaN	NaN	NaN	23.2079			0.00092908	4	2.6	1	1	1	1	7.33584	6.52843	6.64838	6.523	7.02156	47.414
TGVEG_297060;TGME49_297060;TGGT1_297060	phosphoglycerate mutase PGMII	N/A	0	-0.0887213	31.3289	31.5458	31.2389	31.4583			7.6771e-54	64	37.8	10	9	8	9	10.1342	9.467	9.58975	9.54148	9.52143	38.159
TGVEG_297070;TGME49_297070;TGGT1_297070	hypothetical protein;putative duplicated carbonic anhydrase	HMM: MTDCPFAAIRGSSGRISRSHVAFLVILAVAVTSNPTLAF, NN: MTDCPFAAIRGSSGRISRSHVAFLVILAVAVTSNPTLAF;HMM: MTDCPFAAIRGSSGRISRSHVAFLVILAVSVTSNPTLAF, NN: MTDCPFAAIRGSSGRISRSHVAFLVILAVSVTSNPTLAF	0;1	0.0941	29.7843	30.3124	30.0937	30.1912			1.5149e-65	40	29.5	8	9	10	8	9.74207	8.99324	9.18096	9.25295	9.08983	58.102
TGVEG_297430;TGME49_297430;TGGT1_297430	Fop carboxy-terminal duplication domain protein;hypothetical protein	N/A	0	-0.401949	28.0649	27.481	27.4963	27.2457			2.6432e-20	11	21.4	2	3	2	2	8.98118	8.39021	8.51978	8.36764	8.16997	25.306
TGVEG_297470;TGME49_297470;TGGT1_297470	myosin light chain 2, putative;putative myosin light chain 2	N/A	0	-0.134848	27.531	27.7446	27.6718	27.3342			1.422e-27	17	30.2	4	6	4	4	8.97661	8.35133	8.50065	8.41544	8.16441	40.528
TGVEG_297500;TGME49_297500;TGGT1_297500	T-complex protein 1 eta subunit	N/A	0	0.0410175	29.5747	30.0744	29.8611	29.8701			1.4686e-75	58	30.4	10	9	9	9	9.66642	8.91798	9.15284	9.15682	8.97969	59.463
TGVEG_297720;TGME49_297720;TGGT1_297720	trehalose-phosphatase	N/A	0	NaN	NaN	25.4603	NaN	NaN			5.8939e-06	4	2.5	1	2	2	0	7.94924	6.82521	7.75777	7.39855	NaN	136.7
TGVEG_297745;TGME49_297745;TGGT1_297745	hypothetical protein;putative transmembrane protein	N/A	1	NaN	NaN	23.8641	NaN	NaN			0.00012479	1	0.8	0	1	1	1	7.72817	NaN	7.27724	7.22355	7.25069	413.31
TGVEG_297880;TGME49_297880;TGGT1_297880	dense granule protein DG32	HMM: MAARAGSSGVSRRFLFVLFTVLAGSSFVSAD, NN: MAARAGSSGVSRRFLFVLFTVLAGSSFVSAD	1	0.333507	30.3035	30.654	30.7615	30.863			2.7945e-49	56	47	6	6	6	7	9.93718	9.18133	9.34706	9.42264	9.35511	24.153
TGVEG_297970;TGME49_297970;TGGT1_297970	aspartyl aminopeptidase	N/A	0	-0.0214577	26.2486	NaN	26.2271	NaN			3.6423e-30	5	11.4	2	1	3	1	8.40756	7.78993	7.54327	8.12814	7.39254	55.896
TGVEG_298020;TGME49_298020;TGGT1_298020	DEAD-family helicase	N/A	0	NaN	NaN	NaN	NaN	25.2395			0.0036883	2	1	0	1	0	1	7.63311	NaN	NaN	NaN	7.63311	130.96
TGVEG_298610;TGME49_298610;TGGT1_298610	GYF domain-containing protein	N/A	0	NaN	NaN	NaN	25.0844	NaN			1.524e-16	4	2.3	1	2	2	1	8.07566	7.1321	7.57646	7.69418	7.26278	237.89
TGVEG_298970;TGME49_298970;TGGT1_298970	LSM3, U6 small nuclear RNA associated isoform 2 family protein	N/A	0	NaN	NaN	NaN	NaN	25.0409			3.0724e-05	4	20.8	1	1	1	1	8.17569	7.67177	7.52471	7.50493	7.57334	10.752
TGVEG_299050;TGME49_299050;TGGT1_299050	ribosomal protein RPL17	N/A	0	-0.308393	31.7338	31.5773	31.2559	31.4384			2.7921e-63	76	45.6	9	10	7	8	10.1562	9.63651	9.62484	9.46297	9.45911	22.269
TGVEG_299060;TGME49_299060;TGGT1_299060	sodium/hydrogen exchanger NHE2	N/A	13	NaN	NaN	NaN	24.9562	NaN			9.2867e-08	2	3.3	1	0	1	0	7.6556	NaN	NaN	7.6556	NaN	91.269
TGVEG_299070;TGME49_299070;TGGT1_299070	pyruvate kinase PyKII	N/A	0;1	NaN	NaN	NaN	23.5701	NaN			1.3565e-06	4	3.2	1	1	2	1	7.74191	7.35919	7.17664	7.23832	NaN	106.81
TGVEG_299110;TGME49_299110;TGGT1_299110	cleft lip and palate transmembrane protein 1 (clptm1) protein	HMM: MGKLGGALLVAVAAYLSYSI, NN: MGKLGGALLVAVAAYLSYSI	5	NaN	NaN	NaN	26.1367	25.9323			4.2307e-13	8	9.4	2	1	3	2	8.43895	7.87178	7.40586	8.06288	7.77293	71.268
TGVEG_299210;TGME49_299210;TGGT1_299210	CTP synthase	N/A	0	0.268057	29.0728	28.6484	29.2019	29.0555			3.603e-48	36	25.6	12	7	7	5	9.39336	8.9622	8.57777	8.86288	8.65286	70.998
TGVEG_299780;TGGT1_299780;TGME49_299780	hypothetical protein;putative transmembrane protein	HMM: MKPLKSLKHRAIYAVLSVILFHEAVVYGV, NN: MKPLKSLKHRAIYAVLSVILFHEAVVYGV	3	0.216723	26.9283	26.7075	26.9781	27.0911			4.1346e-15	21	10.3	3	5	6	5	8.78882	7.99139	8.15637	8.35207	8.17199	59.191
TGVEG_299810;TGGT1_299810;TGME49_299810	cysteine-tRNA synthetase (CysRS)	HMM: MRSPVLPQKSSVLRFLFLGCSLFLLFFSPCPRNRVSAF, NN: MRSPVLPQKSSVLRFLFLGCSLFLLFFSPCPRNRVSAF	1	-0.157614	27.3388	27.5797	27.3661	27.2371			1.5276e-53	16	12.9	4	6	6	4	8.93199	8.07229	8.4751	8.48247	8.12901	101.52
TGVEG_300000;TGME49_300000;TGGT1_300000	ribosomal protein RPL18	N/A	0	-0.178311	31.5377	31.4923	31.3763	31.2971		+	1.104e-43	67	47.1	10	10	10	6	10.132	9.53189	9.58238	9.5715	9.41484	21.17
TGVEG_300100;TGME49_300100;TGGT1_300100	rhoptry neck protein RON2	HMM: MTKRAGLPLGRAFLVLILLSAADSLFFSSFPRSALQLFSSVLFTDAA, NN: MTKRAGLPLGRAFLVLILLSAADSL	3	-0.20162	30.093	30.3524	30.0322	30.0099			2.7984e-85	83	19.2	15	22	20	20	9.74532	9.00428	9.29128	9.15122	9.07229	166.47
TGVEG_300140;TGME49_300140;TGGT1_300140	elongation factor 1-gamma, putative;putative elongation factor 1-gamma	N/A	0	-0.0254192	31.5921	31.7614	31.6274	31.6754			2.5142e-49	72	40.1	13	10	13	12	10.2061	9.53965	9.61735	9.68781	9.55549	44.039
TGVEG_300190;TGME49_300190;TGGT1_300190;TGME49_325400	ribosomal L37ae family protein;ribosomal protein RPL37A	N/A	0	-0.141667	30.002	29.8113	29.734	29.7959			3.3894e-31	33	52.1	3	6	6	7	9.6568	8.9363	9.05835	9.10975	9.09426	10.404
TGVEG_300260;TGME49_300260;TGGT1_300260	threonyl-tRNA synthetase family protein	N/A	0	-0.177463	30.5568	30.5414	30.3463	30.397			2.4766e-99	70	31.3	18	16	15	13	9.83874	9.27733	9.24507	9.2772	9.1313	95.885
TGVEG_300280;TGME49_300280;TGGT1_300280	LSM domain-containing protein	N/A	0	-0.261535	28.2691	28.4522	28.0951	28.1031			8.9386e-16	16	34.9	3	3	4	4	9.18076	8.39912	8.63426	8.70142	8.52095	17.883
TGVEG_300290;TGME49_300290;TGGT1_300290	SNARE domain-containing protein	N/A	1	NaN	24.3549	NaN	NaN	NaN			0.00056651	1	6.6	1	0	0	0	7.33157	7.33157	NaN	NaN	NaN	25.253
TGVEG_300310;TGME49_300310;TGGT1_300310	26S proteasome regulatory subunit, S6a family AAA ATpase	N/A	0	-0.0463047	NaN	27.2751	27.1736	27.2839			1.9112e-30	12	23	3	3	4	3	8.83156	7.88551	8.31936	8.42119	8.11163	47.787
TGVEG_304710;TGME49_304710;TGGT1_304710	eukaryotic peptide chain release factor, putative;putative eukaryotic peptide chain release factor	N/A	0	-0.0285711	29.2835	29.3703	29.2594	29.3372			3.2801e-64	50	22	10	11	10	8	9.54233	8.8761	9.00173	9.01275	8.84536	90.236
TGVEG_304740;TGME49_304740;TGGT1_304740	rhoptry kinase family protein ROP35	HMM: MRDRGWRCVWHRMAGVGALFGIFGVLCTVEAG, NN: MRDRGWRCVWHRMAGVGALFGIFGVLCTVEAG;N/A	0;1	-0.500074	NaN	27.4503	26.7801	27.1203			3.5463e-11	8	8.5	0	4	4	2	8.74823	NaN	8.39815	8.32629	7.991	67.18
TGVEG_304760;TGME49_304760;TGGT1_304760	RNA recognition motif-containing protein	N/A	0	NaN	NaN	NaN	22.9338	NaN			0.002892	1	1	0	0	1	0	7.04677	NaN	NaN	7.04677	NaN	147.14
TGVEG_304770;TGME49_304770;TGGT1_304770	ubiquitin-conjugating enzyme subfamily protein	N/A	0	-0.219906	28.2508	28.4075	28.0465	28.172			3.0695e-35	15	43.9	3	2	2	2	9.16382	8.52418	8.59841	8.53605	8.58392	17.622
TGVEG_304955;TGME49_304955;TGGT1_304955	serine/threonine specific protein phosphatase	N/A	3	0.298444	27.0127	27.711	27.506	27.8145			2.7128e-45	24	4.5	5	5	5	3	8.97659	8.12401	8.4893	8.51661	8.24888	303.84
TGVEG_305040;TGME49_305040;TGGT1_305040	HEAT repeat-containing protein	N/A	0	NaN	NaN	NaN	NaN	22.9096			0.00077973	3	0.9	0	1	1	1	7.55683	NaN	7.15372	7.12228	6.93173	125.97
TGVEG_305050;TGME49_305050;TGGT1_305050	calmodulin, putative;putative calmodulin	N/A	0	NaN	27.0187	28.0127	NaN	NaN			3.2963e-18	11	36.1	2	4	1	1	8.79724	7.82643	8.62457	7.81345	7.86659	15.277
TGVEG_305240;TGME49_305240;TGGT1_305240	XPA binding protein 2 family protein	N/A	0	NaN	NaN	NaN	NaN	22.8019			0.0017139	1	1	0	0	0	1	6.89931	NaN	NaN	NaN	6.89931	111.44
TGVEG_305270;TGME49_305270;TGGT1_305270	hypothetical protein	HMM: MKPFAPILLLLALFPFSGSGVSF, NN: MKPFAPILLLLALFPFSGSG	0	NaN	NaN	27.2752	NaN	NaN			5.4664e-05	2	2.8	0	2	0	0	8.3041	NaN	8.3041	NaN	NaN	82.314
TGVEG_305290;TGME49_305290;TGGT1_305290	putative vacuolar atp synthase subunit e;vacuolar atp synthase subunit e, putative	N/A	0	-0.0535736	NaN	27.79	NaN	27.7365			2.9522e-16	8	14.2	3	3	2	2	8.97492	8.22246	8.5624	8.37469	8.24284	39.083
TGVEG_305340;TGME49_305340;TGGT1_305340	corepressor complex CRC230	N/A	0	NaN	NaN	NaN	NaN	26.6309			7.7569e-21	10	5.7	3	3	1	5	8.5902	8.14004	8.03723	7.47007	8.05196	207.3
TGVEG_305520;TGME49_305520;TGGT1_305520	ribosomal protein RPS2	N/A	0	-0.179584	31.8076	31.7645	31.5879	31.625			1.4378e-89	98	44.6	9	11	12	12	10.3123	9.59102	9.74387	9.82768	9.63898	29.336
TGVEG_305780;TGME49_305780;TGGT1_305780	5'-3' exoribonuclease, putative;putative 5'-3' exoribonuclease	N/A	0	NaN	NaN	NaN	24.3398	NaN			4.0554e-07	2	2.2	0	1	2	1	7.76879	NaN	7.36974	7.47004	6.76169	138.67
TGVEG_305820;TGME49_305820;TGGT1_305820	SGS domain-containing protein	N/A	0	NaN	NaN	NaN	NaN	24.5564			0.0021188	3	4.6	0	1	1	1	7.90647	NaN	7.36996	7.48323	7.42749	29.999
TGVEG_305850;TGME49_305850;TGGT1_305850	RNA recognition motif-containing protein	N/A	0	0.201247	28.1657	27.865	28.0918	28.3413			7.4575e-28	18	32	4	5	4	3	9.14345	8.5084	8.53826	8.67732	8.39436	39.168
TGVEG_305980;TGME49_305980;TGGT1_305980	pyruvate dehydrogenase complex subunit PDH-E3I	N/A	0	-0.0450954	27.7859	28.2094	28.1465	27.7587			7.2459e-32	23	17.2	7	7	4	3	9.09909	8.51246	8.62293	8.53354	8.22943	66.838
TGVEG_306030;TGME49_306030;TGGT1_306030	glutathione s-transferase, n-terminal domain containing protein	N/A	0	-0.173773	26.1817	26.3359	26.1212	26.0488			4.6361e-11	9	11.1	2	2	2	3	8.54834	7.87633	8.00966	7.91632	7.97088	37.831
TGVEG_306650;TGME49_306650;TGGT1_306650	hypothetical protein	HMM: MPLSLPTARLFARVALTLRGSCCS, NN: MPLSLPTARLFARVALTL;HMM: MPLSLPTARLFARVALTLRGSCCS, NN: MPLSLPTARLFARVALTLRGSCCS	0	0.132168	26.7713	26.8082	27.1443	26.6995			5.0589e-10	10	12.9	2	2	2	1	8.77571	7.9523	8.28637	8.35021	7.95279	31.511
TGVEG_306670;TGME49_306670;TGGT1_306670	hypothetical protein;NADH-ubiquinone reductase complex 1 MLRQ subunit	N/A	2	-0.0041647	NaN	28.0538	28.16	27.9393			2.5895e-16	12	32.7	1	4	5	3	9.05323	7.8045	8.55705	8.71792	8.26404	25.833
TGVEG_306930;TGME49_306930;TGGT1_306930	proteasome subunit beta type 7 precursor, putative;putative proteasome subunit beta type 7 precursor	N/A	0	-0.197547	NaN	28.6259	28.3815	28.4753			9.9661e-10	9	11.4	1	2	3	2	9.16967	7.75893	8.66454	8.76997	8.56807	39.587
TGVEG_306970;TGME49_306970;TGGT1_306970	thymidylate kinase	N/A	0	NaN	NaN	NaN	23.3774	NaN			0.0022952	2	3.3	1	0	1	0	7.43396	7.07969	NaN	7.18036	NaN	30.171
TGVEG_307850;TGGT1_307850;TGME49_307850	6-phosphogluconate dehydrogenase	N/A	0	-0.0280609	NaN	26.0922	26.0641	NaN			4.2842e-07	4	5	0	2	2	2	8.41679	NaN	7.95931	7.97725	7.87585	54.734
TGVEG_308090;TGGT1_308090	rhoptry protein ROP5	HMM: MATKLARLATWLVLVGCLLWRAGAV, NN: MATKLARLATWLVLVGCLLWRAGAV	0	-0.144518	34.9754	34.8946	34.7127	34.8683			5.1984e-225	332	54.5	29	26	25	28	11.1747	10.5622	10.6147	10.5741	10.5357	60.775
TGVEG_308860;TGME49_308860;TGGT1_308860	hypothetical protein	N/A	0	-0.447262	27.6638	NaN	27.2165	NaN		+	1.0719e-09	7	7	3	3	4	1	8.80187	8.27265	8.22287	8.40128	7.43686	69.756
TGVEG_308920;TGME49_308920;TGGT1_308920	splicing factor U2AF protein	N/A	0	NaN	NaN	NaN	25.6617	NaN			3.8144e-13	4	4.2	1	1	2	0	8.0816	7.1274	7.52473	7.86798	NaN	83.178
TGVEG_308950;TGME49_308950;TGGT1_308950	histidine acid phosphatase superfamily protein	HMM: MVRVFCVAAVFGLFGATRVSGS, NN: MVRVFCVAAVFGLFGATRVSGS	0	0.16492	25.6297	25.5866	25.6607	25.8855			7.4531e-08	10	4.5	3	2	2	2	8.39358	7.89299	7.69382	7.74442	7.80901	66.302
TGVEG_309140;TGME49_309140;TGGT1_309140	transducin beta-like protein TBL1	N/A	0	NaN	NaN	NaN	NaN	23.6469			1.2017e-05	3	2	1	1	0	1	7.67225	6.94846	7.3782	NaN	7.15369	84.698
TGVEG_309210;TGME49_309210;TGGT1_309210	peroxiredoxin 6, putative;putative peroxiredoxin 6	N/A	0	0.20892	31.1577	31.4445	31.5689	31.4512			4.5393e-74	65	29.1	11	10	9	11	10.1359	9.42108	9.56554	9.60877	9.51813	44.035
TGVEG_309265;TGME49_309265;TGGT1_309265	oxidoreductase, short chain dehydrogenase/reductase family protein	N/A	1;2	0.25506	NaN	25.3497	25.6048	NaN			9.3992e-09	7	2.5	0	2	2	2	8.16388	NaN	7.72278	7.85225	7.33971	89.335
TGVEG_309560;TGME49_309560;TGGT1_309560	nmda receptor glutamate-binding chain	N/A	7	0.150074	28.5308	27.8181	28.3455	28.3035		+	7.5029e-18	13	14.7	3	3	3	2	9.18543	8.60405	8.57089	8.71275	8.38446	29.321
TGVEG_309730;TGME49_309730;TGGT1_309730	thioredoxin reductase	HMM: MSCLSVSAARAYAAAAASRPVSAS, NN: MSCLSVSAARAYAAAAASRPVSAS	0	0.0313559	30.4449	30.25	30.2882	30.4694			2.9002e-135	48	25.8	8	10	10	9	9.81705	9.08106	9.24724	9.29973	9.20303	70.781
TGVEG_309740;TGME49_309740;TGGT1_309740	LSM domain-containing protein	N/A	0	-0.528144	27.6498	27.6688	27.1311	NaN			2.5216e-13	17	37.4	3	2	2	2	8.91617	8.41837	8.37146	8.26026	8.16176	14.411
TGVEG_309752;TGME49_309752;TGGT1_309752	putative succinate-Coenzyme A ligase, beta subunit;succinate-Coenzyme A ligase, beta subunit, putative	HMM: MALSAAGVGRQVLSAAARLSCSTSSAPLRATISSVTAASATSSSLLPSLLCATHRATGA, NN: MALSAAGVGRQVLSAAAR	0	-0.116321	29.8648	29.828	29.6331	29.827			2.029e-49	38	26.3	9	8	7	7	9.63449	9.0596	9.10168	8.99779	8.95631	53.388
TGVEG_309810;TGME49_309810;TGGT1_309810	ribosomal protein RPP2	HMM: MAMKYVAAYLMVVLSGTDAP, NN: MAMKYVAAYLMVVLSGTDAP	0	-0.367047	30.6353	31.4517	30.0424	31.3105			9.3333e-41	32	53.1	3	4	3	3	10.0103	9.26439	9.6374	9.22732	9.37548	11.768
TGVEG_309820;TGME49_309820;TGGT1_309820	ribosomal protein RPL11	N/A	0	0.0154486	31.1275	31.1586	31.1547	31.1623			5.4689e-70	48	56.6	6	5	6	5	10.0543	9.36627	9.48549	9.5386	9.39688	20.199
TGVEG_310030;TGME49_310030;TGGT1_310030	cyclase-associated protein, putative;putative cyclase-associated protein	N/A	0	-0.126118	30.1387	29.9106	30.1393	29.6577			1.4139e-56	35	56.7	7	6	7	5	9.71009	9.03254	9.1442	9.2491	8.9462	22.483
TGVEG_310040;TGME49_310040;TGGT1_310040	putative ubiquitin conjugating enzyme E2;ubiquitin conjugating enzyme E2, putative	N/A	0	0.325608	28.0179	28.3402	28.4589	28.5505			2.1226e-25	27	28.1	4	4	4	3	9.21331	8.5741	8.63339	8.74507	8.43659	22.63
TGVEG_310070;TGME49_310070;TGGT1_310070	methyltransferase, putative;putative methyltransferase	N/A	0	0.109333	26.4204	26.8818	26.6608	26.8601			8.2518e-21	20	36.2	6	2	4	2	8.7129	8.19959	8.0484	8.22572	7.89215	25.335
TGVEG_310080;TGME49_310080;TGGT1_310080	AMP-binding enzyme domain-containing protein	N/A	0	0.0546217	30.2186	30.3667	30.2725	30.422			2.1073e-143	82	46.1	15	23	20	17	9.80441	9.04731	9.32993	9.23388	9.14848	87.847
TGVEG_310180;TGME49_310180;TGGT1_310180	hypothetical protein	HMM: MSTSPGLAFANLTLLLDVPQLPAI, NN: MSTSPGLAFANLTLLLDVPQLPAI	0	NaN	NaN	NaN	26.6987	NaN			2.319e-08	4	26.1	1	0	2	1	8.50232	8.02869	NaN	8.18015	7.77583	10.408
TGVEG_310360;TGME49_310360;TGGT1_310360	hypothetical protein;putative transmembrane protein	N/A	3	-0.715349	27.7784	NaN	27.3451	26.7811			5.7832e-29	8	20.1	2	1	2	2	8.81879	8.38987	7.81129	8.39986	7.9894	24.539
TGVEG_310440;TGME49_310440;TGGT1_310440	membrane occupation and recognition nexus protein MORN1	N/A	0	NaN	NaN	NaN	25.9575	NaN			9.8968e-08	3	7.2	1	0	1	1	8.27852	7.80017	NaN	7.95701	7.55874	40.889
TGVEG_310490;TGME49_310490;TGGT1_310490	ribosomal protein RPL27A	N/A	0	-0.0780811	30.995	31.0113	30.8556	30.9945			1.9727e-37	43	44.2	8	8	8	8	9.98566	9.36331	9.52888	9.17846	9.39424	16.344
TGVEG_310640;TGME49_310640;TGGT1_310640	phosphorylase family protein	N/A	0	0.0588417	30.7092	30.7067	30.7874	30.7462			8.0973e-75	60	49.5	12	8	8	8	9.92339	9.30591	9.32813	9.37311	9.27191	33.043
TGVEG_310700;TGME49_310700;TGGT1_310700	serine/threonine phosophatase PP1	N/A	0	-0.187103	NaN	27.6881	27.7767	27.2254			3.3553e-37	10	28.8	1	2	2	2	8.91926	7.85979	8.42899	8.50409	8.23088	35.005
TGVEG_310750;TGME49_310750;TGGT1_310750	emp24/gp25L/p24 family protein	HMM: MKALLVLSALLAACLQGRLASAA, NN: MKALLVLSALLAACLQGRLASAA	1	NaN	NaN	NaN	27.9422	27.9102			2.6021e-20	12	11	4	4	3	2	9.03679	8.30012	8.39478	8.59952	8.38559	64.977
TGVEG_310790;TGME49_310790;TGGT1_310790	hypothetical protein	HMM: MTRGFAFCLLFLALFGLFSVAPHSIEAG, NN: MTRGFAFCLLFLALFGLFSVAPHSIEAG	0	NaN	NaN	NaN	NaN	27.9758			7.8866e-10	6	20.1	0	1	0	3	8.53948	NaN	7.77822	NaN	8.45684	24.708
TGVEG_310870;TGME49_310870;TGGT1_310870	integral membrane protein, putative;putative integral membrane protein	HMM: MASAPAGAGLWGVDFSQTLLIFVLGLAVGLFSE, NN: MASAPAGAGLWGVDFSQTLLIFVLGLAVGL	2	NaN	NaN	NaN	NaN	25.2941			0.0076196	1	4.5	0	0	0	1	7.64956	NaN	NaN	NaN	7.64956	21.942
TGVEG_310950;TGME49_310950;TGGT1_310950	AP2 domain transcription factor AP2XI-3	N/A	0	0.224079	25.8482	26.6207	NaN	26.4586			5.4466e-08	5	2.7	2	3	1	2	8.51445	7.75434	8.16385	7.55625	7.94598	135.1
TGVEG_311090;TGME49_311090;TGGT1_311090	ubiquitin carboxyl-terminal hydrolase	N/A	0	-0.237121	27.3434	27.813	27.3187	27.3634			1.6082e-48	15	19.6	2	5	6	5	8.95869	7.78297	8.49357	8.47812	8.37352	67.166
TGVEG_311240;TGME49_311240;TGGT1_311240	DnaJ family chaperone, putative;putative DnaJ family chaperone	N/A	0	-0.169954	30.1492	30.3432	30.0906	30.0619			6.4777e-55	41	28.2	10	8	7	9	9.74892	9.11177	9.19368	9.13341	9.14442	47.448
TGVEG_311290;TGME49_311290;TGGT1_311290	protein tyrosine phosphatase family protein, ptpla protein	HMM: MAEAAPARASLAGKVPGPRPPSLAVHLYLFLYNCVATAA, NN: MAEAAPARASLAGKVPGPRPPSLAVHLYLFLYNCVATAA	3	NaN	26.8282	26.9224	NaN	NaN			3.3449e-10	7	13.1	2	3	1	1	8.59621	8.00766	8.25348	7.71888	7.78722	30.563
TGVEG_311310;TGME49_311310;TGGT1_311310	protein phosphatase 2B catalytic subunit, calcineurin family phosphatse superfamily protein	N/A	0	0.192001	27.869	27.7146	27.7878	28.1797			8.297e-24	19	17.8	5	7	5	5	9.07137	8.43327	8.63865	8.44422	8.28803	56.445
TGVEG_311400;TGME49_311400;TGGT1_311400	WD domain, G-beta repeat-containing protein	N/A	0	-0.0467377	28.4689	28.7631	28.6342	28.5043			2.582e-54	32	11.2	5	9	9	7	9.29634	8.46567	8.70624	8.90737	8.56812	165.57
TGVEG_311480;TGME49_311480;TGGT1_311480	hypothetical protein	N/A	0	NaN	NaN	25.7944	NaN	NaN			2.4481e-13	3	16.3	1	2	1	1	8.2229	7.7049	7.85833	7.20101	7.45228	42.379
TGVEG_311680;TGME49_311680;TGGT1_311680	FUN14 family protein	N/A	0	NaN	NaN	NaN	24.6664	NaN			0.0038196	1	7.6	0	0	1	0	7.56834	NaN	NaN	7.56834	NaN	19.986
TGVEG_311690;TGME49_311690;TGGT1_311690	UBA/TS-N domain-containing protein	N/A	0	NaN	NaN	26.8283	NaN	NaN			1.7332e-18	6	8.9	1	3	1	0	8.35182	7.14114	8.16956	7.80079	NaN	45.975
TGVEG_311720;TGME49_311720;TGGT1_311720	chaperonin protein BiP	HMM: MTAAKKLSLFSLAALFCLLSVATLRPVAAS, NN: MTAAKKLSLFSLAALFCLLSVATLRPVAAS	1	-0.0146084	33.8551	33.988	33.9453	33.8686			0	279	59.1	35	32	32	32	10.9014	10.2246	10.3628	10.3575	10.2326	73.252
TGVEG_312050;TGME49_312050;TGGT1_312050	putative small GTPase Rab2;small GTPase Rab2, putative	N/A	0	NaN	NaN	26.2969	NaN	NaN			2.4832e-27	2	29.9	1	2	0	0	8.14126	7.55876	8.00962	NaN	NaN	24.209
TGVEG_312090;TGME49_312090;TGGT1_312090	ribosomal protein RPL23	N/A	0	-0.261419	31.0058	30.7967	30.7561	30.5236			9.2897e-56	52	71.9	9	9	9	8	9.94404	9.32439	9.39208	9.42935	9.1837	14.818
TGVEG_312160;TGME49_312160;TGGT1_312160	hypothetical protein	N/A	0	NaN	NaN	NaN	25.7861	26.6808			9.6758e-05	5	11.1	1	0	2	2	8.41127	7.79102	NaN	7.87682	8.08164	22.261
TGVEG_312200;TGME49_312200;TGGT1_312200	serine/threonine protein phosphatase	N/A	0	-0.128105	26.5199	NaN	NaN	26.3918			1.276e-16	9	11.7	3	3	1	2	8.63997	8.01292	8.33013	7.49805	7.94511	61.536
TGVEG_312420;TGME49_312420;TGGT1_312420	hypothetical protein;putative transmembrane protein	HMM: MAILRLSFVFSLSLLIALYSVWQH, NN: MAILRLSFVFSLSLLIALYSVWQH;HMM: MAILRLSFVFSLSSLIALYSVWQH, NN: MAILRLSFVFSLSSLIALYSVWQHLLHAR	0;1	0.0115175	28.2453	28.2885	28.1881	28.3687			9.095e-32	21	10.6	4	6	6	8	9.18259	8.41819	8.54721	8.62294	8.68877	117.81
TGVEG_312480;TGME49_312480;TGGT1_312480	putative uracil phosphoribosyltransferase FUR1;uracil phosphoribosyltransferase FUR1, putative	N/A	0	0.109916	27.3261	27.463	27.5201	27.4889			1.4734e-38	25	30.7	5	5	6	4	8.94173	8.25842	8.35087	8.47395	8.23297	27.646
TGVEG_312490;TGME49_312490;TGGT1_312490	hypothetical protein	N/A	0	NaN	NaN	NaN	NaN	23.8167			1.3449e-05	4	4.3	1	1	1	1	8.0762	7.52808	7.56964	7.50911	7.2048	49.078
TGVEG_312530;TGME49_312530;TGGT1_312530	splicing factor, CC1 family protein	N/A	0	NaN	NaN	NaN	NaN	24.4674			1.8845e-05	3	2.4	0	0	1	2	7.40068	NaN	NaN	NaN	7.40068	69.365
TGVEG_312600;TGME49_312600;TGGT1_312600	heat shock protein HSP21	N/A	0	NaN	28.4309	NaN	NaN	NaN			3.6665e-14	10	28.2	5	2	1	1	8.90562	8.55854	8.2388	8.15612	8.10127	21.279
TGVEG_312630;TGME49_312630;TGGT1_312630	anonymous antigen-1, putative;putative anonymous antigen-1	N/A	0	-0.0648317	30.6262	30.7304	30.5826	30.6443			5.0586e-156	91	14.7	21	23	22	19	9.90143	9.20917	9.40049	9.34384	9.21187	286.22
TGVEG_312640;TGME49_312640;TGGT1_312640	hypothetical protein;PUB domain protein	N/A	0	NaN	NaN	NaN	NaN	24.8581			0.0034887	4	3.8	1	1	1	1	7.77547	6.88736	7.27717	NaN	7.5183	31.692
TGVEG_313010;TGME49_313010;TGGT1_313010	DEAD (Asp-Glu-Ala-Asp) box polypeptide DDX6	N/A	0	-0.0556793	28.4001	28.6997	28.5591	28.4293			5.4187e-26	26	18.1	6	6	6	6	9.26333	8.56003	8.73489	8.73101	8.59018	53.434
TGVEG_313070;TGME49_313070;TGGT1_313070	hypothetical protein;putative transmembrane protein	N/A	1	NaN	NaN	NaN	NaN	24.0485			0.0028516	4	2.7	1	1	1	1	8.05026	7.36909	7.51419	7.5727	7.2746	35.571
TGVEG_313080;TGME49_313080;TGGT1_313080	hypothetical protein;putative transmembrane protein	HMM: MAASVPRLPPLFLSTALLLCLAA, NN: MAASVPRLPPLFLSTALLLCLAA	1	-0.0433941	29.8698	29.7094	29.832	29.6604			3.3742e-47	36	33	8	9	8	8	9.6347	8.93214	9.10534	9.05881	9.0159	49.527
TGVEG_313100;TGME49_313100;TGGT1_313100	signal recognition particle SRP54 protein	N/A	0	NaN	NaN	NaN	NaN	23.9753			1.0919e-06	1	6	0	0	1	1	7.79075	NaN	NaN	7.64225	7.25256	62.79
TGVEG_313140;TGME49_313140;TGGT1_313140	isocitrate dehydrogenase	HMM: MRAENSGFSQKSVRFWTPLESVQPRTACSFSLCLLWKVCLLS, NN: MRAENSGFSQKSVRFWTPLESVQPRTACSFSLCLLWKVCLLSC;HMM: MRAENSGFSQKSVRLWTPLESVQPRTACSFSLCLLWKVCLLS, NN: MRAENSGFSQKSVRLWTPLESVQPRTACSFSLCLLWKVCLLSC	0	0.0502644	29.8689	30.2658	30.0104	30.2249			4.2861e-46	59	21.1	8	11	10	10	9.73993	8.91991	9.2774	9.17615	9.10336	68.295
TGVEG_313190;TGME49_313190;TGGT1_313190	Rab18/RabC-family small GTPase	N/A	0	NaN	NaN	NaN	NaN	28.4413			4.7832e-09	8	14.2	1	1	1	1	9.22871	8.61338	8.56138	8.71855	8.59695	23.481
TGVEG_313230;TGME49_313230;TGGT1_313230	eukaryotic initiation factor-2, alpha subunit	N/A	0	0.00892258	29.401	29.6589	29.4141	29.6637			4.5364e-56	45	41.8	7	10	11	8	9.5737	8.73518	9.06554	9.05824	8.95292	39.126
TGVEG_313270;TGME49_313270;TGGT1_313270	hypothetical protein;putative collagen alpha-1(III) chain, related protein	N/A	0	NaN	26.2116	NaN	NaN	NaN			2.0987e-18	2	1.8	3	0	0	0	7.89049	7.89049	NaN	NaN	NaN	281.36
TGVEG_313390;TGME49_313390;TGGT1_313390	ribosomal protein RPL6	HMM: MSGNCQATLGFLPIASHSRAK, NN: MSGNCQATLGFLPIASHSRAKVCFCVDCGTAADVFFFPAPLRAL;N/A	0	-0.264671	32.2809	32.1652	32.0434	31.8734			2.1066e-143	104	42.9	14	14	13	15	10.3416	9.69881	9.8201	9.78032	9.63541	31.222
TGVEG_313560;TGME49_313560;TGGT1_313560	60S ribosomal protein L7a, putative;putative 60S ribosomal protein L7a	N/A	0	NaN	NaN	NaN	NaN	26.5391			7.3175e-11	5	19.1	2	2	2	2	8.60633	7.9225	7.87937	8.14233	8.02432	19.251
TGVEG_313640;TGME49_313640;TGGT1_313640	hypothetical protein;putative transmembrane protein	HMM: MDFFVCHPSKGRSASLLRAVALFSLAVHCGLLLVESR, NN: MDFFVCHPSKGRSASLLRAVALFSLAVHCGLLLVESR	1	NaN	NaN	25.1503	NaN	NaN			8.4236e-05	1	7	0	1	0	0	7.66444	NaN	7.66444	NaN	NaN	22.302
TGVEG_313670;TGME49_313670;TGGT1_313670	adaptin n terminal region domain-containing protein	N/A	0	NaN	NaN	25.4472	NaN	NaN			2.2571e-06	4	2.4	1	2	1	2	8.24866	7.31152	7.75381	7.40169	7.87415	107
TGVEG_313910;TGME49_313910;TGGT1_313910	RNA recognition motif 2 protein	N/A	0	NaN	25.4815	NaN	NaN	NaN			0.0014307	1	1.1	1	0	0	0	7.67069	7.67069	NaN	NaN	NaN	99.536
TGVEG_314090;TGME49_314090;TGGT1_314090	proteasome beta subunit	N/A	0	-0.407157	28.19	28.1217	27.7864	27.7111			1.6978e-12	12	25.9	3	3	4	4	9.09405	8.33163	8.47819	8.58202	8.53716	22.482
TGVEG_314100;TGME49_314100;TGGT1_314100	tetratricopeptide repeat-containing protein	N/A	0	-0.120423	NaN	27.075	26.9779	26.9312			9.2945e-11	9	7.6	2	2	2	2	8.79065	8.077	8.24433	8.26684	8.13906	64.292
TGVEG_314260;TGME49_314260;TGGT1_314260	hypothetical protein;putative transmembrane protein	N/A	1	NaN	24.3596	NaN	NaN	NaN			1.0336e-06	1	6.1	1	0	0	0	7.33298	7.33298	NaN	NaN	NaN	23.795
TGVEG_314400;TGME49_314400;TGGT1_314400	putative pyruvate dehydrogenase E1 component, beta subunit;pyruvate dehydrogenase E1 component, beta subunit, putative	HMM: MVAFPSLSAASAAARTNGF, NN: MVAFPSLSAASAAARTNGFASFCKPGMACKGAGFVRFFSFFAPARGAAAG	0	0.173467	28.9764	29.0344	29.1638	29.1939			5.0365e-30	22	20.1	3	5	5	5	9.44235	8.45691	8.92699	8.95892	8.86204	45.598
TGVEG_314750;TGME49_314750;TGGT1_314750	hypothetical protein;ribosomal L1p/L10e family protein	N/A	0	NaN	NaN	NaN	NaN	23.5766			2.1598e-05	1	3	0	0	0	1	7.13252	NaN	NaN	NaN	7.13252	49.994
TGVEG_314790;TGME49_314790;TGGT1_314790	putative small nuclear ribonucleoprotein G;small nuclear ribonucleoprotein G, putative	N/A	0	NaN	NaN	27.2302	NaN	NaN			8.5376e-06	7	20.4	2	1	2	1	8.60097	7.82916	8.29055	8.0661	7.29774	10.199
TGVEG_314810;TGME49_314810;TGGT1_314810	ribosomal protein RPL7	N/A	0	-0.209194	32.5706	32.4853	32.2922	32.3454			1.1042e-59	104	56.2	12	15	15	15	10.4428	9.75321	9.93902	9.89638	9.73963	30.121
TGVEG_314820;TGME49_314820;TGGT1_314820	atp synthase F1, epsilon subunit, putative;putative atp synthase F1, epsilon subunit	N/A	0	-0.545027	27.7816	27.288	NaN	26.9898			1.6476e-10	6	30.1	2	2	1	2	8.87123	8.34149	8.34355	8.20898	8.15079	8.4786
TGVEG_314970;TGME49_314970;TGGT1_314970	root hair defective 3 gtp-binding protein (rhd3) protein	N/A	2	NaN	27.4039	NaN	NaN	NaN			2.2677e-43	10	18.4	5	5	3	3	8.75248	8.24939	8.3539	7.80715	7.99097	98.253
TGVEG_315110;TGME49_315110;TGGT1_315110	prefoldin, alpha subunit protein	HMM: MAAIAAGAASQAPRSPASLASLSLQQLVGV, NN: MAAIAAGAASQAPRSPASLASLSLQQLVGV	0	NaN	NaN	25.2407	NaN	NaN			3.0806e-08	3	15.2	1	1	0	1	8.16056	7.64161	7.69164	NaN	7.71397	19.384
TGVEG_315210;TGME49_315210;TGGT1_315210	putative rhoptry protein;rhoptry protein, putative	N/A	7;9	NaN	NaN	NaN	25.2679	NaN			2.0398e-19	5	4.3	1	2	2	1	8.22837	7.32129	7.67375	7.74941	7.65226	115.86
TGVEG_315220;TGME49_315220;TGGT1_315220	rhoptry protein ROP14	N/A	11;9	NaN	NaN	NaN	25.9924	NaN			3.9269e-13	8	5.9	1	2	3	2	8.35434	7.19248	7.758	7.96751	7.78157	121.91
TGVEG_315270;TGME49_315270;TGGT1_315270	hypothetical protein;putative eIF4-gamma/eIF5/eIF2b-epsilon carboxy-terminal domain protein	N/A	0	0.00129509	27.6572	NaN	27.6585	NaN			4.611e-34	7	8.5	4	1	2	1	8.83453	8.43944	8.07324	8.31465	7.92095	84.599
TGVEG_315490;TGME49_315490;TGGT1_315490	rhoptry protein ROP10	HMM: MGRPRWPLPSMFFLSLLCVSEKRFSVSGL, NN: MGRPRWPLPSMFFLSLLCVSEKRFSVSGL	0	0.344307	NaN	26.925	27.2947	27.2439			5.6307e-14	7	7.2	1	3	3	2	8.79686	7.75591	8.28679	8.40611	8.08314	60.911
TGVEG_315570;TGME49_315570;TGGT1_315570	hypothetical protein	N/A	0	0.145992	27.9708	27.6665	27.8816	28.0476			1.3736e-12	9	16.5	2	2	1	1	9.06465	8.4998	7.87417	8.6238	8.54291	9.2735
TGVEG_315610;TGME49_315610;TGGT1_315610	hypothetical protein	N/A	0	NaN	NaN	28.4464	NaN	NaN			5.4692e-36	5	23.4	1	2	1	1	9.02276	8.03563	8.65664	8.37061	8.40981	15.971
TGVEG_315620;TGME49_315620;TGGT1_315620	putative vacuolar ATP synthase subunit C;vacuolar ATP synthase subunit C, putative	N/A	0	NaN	26.2636	NaN	NaN	NaN			2.3399e-10	5	13.4	3	2	1	1	8.37146	7.90612	7.80044	7.67822	7.64172	46.075
TGVEG_315670;TGME49_315670;TGGT1_315670	HEAT repeat-containing protein	N/A	0	NaN	NaN	NaN	22.7183	NaN			0.0032102	3	1.2	1	1	1	0	7.55576	7.12626	7.11361	6.98191	NaN	82.718
TGVEG_315770;TGME49_315770;TGGT1_315770	cytochrome p450 superfamily protein	N/A	1	0.324149	28.1778	28.7167	28.922	28.6208			1.0284e-35	31	17.5	4	6	7	6	9.30546	8.41254	8.7414	8.87848	8.65771	62.584
TGVEG_315930;TGME49_315930;TGGT1_315930	integral membrane protein, DUF56 family protein, putative;putative integral membrane protein, DUF56 family protein	N/A	0	NaN	NaN	NaN	25.2621	NaN			0.0033577	3	8.3	1	1	1	0	8.19844	7.58561	7.8026	7.74768	NaN	18.101
TGVEG_316140;TGME49_316140;TGGT1_316140	hypothetical protein;reactive oxygen species modulator 1	N/A	2	NaN	NaN	NaN	NaN	24.6139			5.4105e-07	3	5.3	1	1	1	1	8.30692	7.99924	7.55843	7.58973	7.44479	27.845
TGVEG_316250;TGME49_316250;TGGT1_316250	hypothetical protein	HMM: MKGISSRCSALLRGGCLALAVLAALERMFTVAD, NN: MKGISSRCSALLRGGCLALAVLAALERMFTVAD;HMM: MKGVSSRCSALLRGGCLALAVLAALERLFTVAD, NN: MKGVSSRCSALLRGGCLALAVLAA	0	-0.0542822	27.2516	26.5552	26.8491	NaN			1.2024e-06	9	7.9	2	3	3	1	8.69897	8.15506	8.08927	8.28081	7.63722	44.748
TGVEG_316310;TGME49_316310;TGGT1_316310	superoxide dismutase	N/A	0	-0.149789	31.8752	31.726	31.7173	31.5843			6.1522e-113	84	88.1	11	10	13	8	10.2287	9.66283	9.5882	9.73631	9.47842	22.55
TGVEG_316340;TGME49_316340;TGGT1_316340	hypothetical protein	N/A	0	NaN	NaN	NaN	NaN	25.5618			2.2159e-05	1	10.7	0	0	0	2	7.73013	NaN	NaN	NaN	7.73013	26.849
TGVEG_318160;TGME49_318160;TGGT1_318160	MSP (Major sperm protein) domain-containing protein	N/A	1	0.0644245	29.1955	29.3688	29.1634	29.5297			5.5293e-92	40	54.4	9	3	7	6	9.49199	9.05793	8.6645	9.02317	8.6485	25.975
TGVEG_318310;TGME49_318310;TGGT1_318310	transketolase	N/A	0	-0.0725937	29.4876	29.5975	29.6132	29.3267			8.642e-66	43	26.6	7	11	8	9	9.5606	8.79682	9.09174	8.99157	8.89957	76.904
TGVEG_318410;TGME49_318410;TGGT1_318410	putative TCP-1 chaperonin;TCP-1 chaperonin, putative	N/A	0	-0.207819	29.7121	29.3902	29.3525	29.3342			6.2534e-71	40	30.5	9	10	10	8	9.54481	8.85614	8.9903	9.05526	8.82889	58.665
TGVEG_318430;TGME49_318430;TGGT1_318430	malate dehydrogenase MDH	N/A	0	0.0385256	30.0579	30.3692	30.2466	30.2575			1.3655e-60	58	33.7	9	12	9	9	9.78622	8.91399	9.40507	9.186	9.08497	54.703
TGVEG_318440;TGME49_318440;TGGT1_318440	helicase associated domain (ha2) protein	N/A	0	NaN	NaN	25.5661	NaN	NaN			6.9454e-17	6	2.9	1	3	1	2	8.14041	7.40188	7.7896	7.2068	7.54701	236.9
TGVEG_318580;TGGT1_318580;TGME49_318580	glucosephosphate-mutase GPM2	N/A	0	-0.431744	NaN	27.4388	26.752	27.2621			1.4427e-15	10	7.5	1	4	2	2	8.87455	7.93107	8.37365	8.20507	8.42659	65.895
TGVEG_318700;TGME49_318700;TGGT1_318700	eukaryotic initiation factor-6, putative;putative eukaryotic initiation factor-6	HMM: MNASCAALWSLGSSRMATRAQ, NN: MNASCAALWSLGSSRMATRAQ	0	NaN	NaN	NaN	26.4395	NaN			2.8584e-07	3	14	1	1	2	1	8.50625	7.79548	7.90193	8.10209	7.71668	28.573
TGVEG_318710;TGME49_318710;TGGT1_318710	ATP-binding cassette sub-family F member 1;ATP-binding protein	N/A	0	NaN	NaN	26.7065	NaN	NaN			2.7744e-11	7	5.1	2	3	1	1	8.54384	8.03133	8.13287	7.85836	7.53632	89.162
TGVEG_319340;TGME49_319340;TGGT1_319340	hypothetical protein;putative kelch motif protein	HMM: MACDRLAAMLPSQRRGLCCRGRNALLFFALFCFAVCLLGH, NN: MACDRLAAMLPSQRRGLCCRGRNALLFFALFCFAVCLLGH	1	0.0157957	31.2435	31.2821	31.3136	31.2436			6.6668e-90	84	29.5	12	13	12	13	10.0876	9.39136	9.51538	9.55654	9.46168	52.432
TGVEG_319350;TGME49_319350;TGGT1_319350	SAG-related sequence SRS17B	HMM: MASQKVLVCLTVAGCLLATFHTFCASVSAASAG, NN: MASQKVLVCLTVAGCLLAT	2	0.0883617	28.2474	28.1263	28.3606	28.1897		+	4.1496e-24	26	23	4	3	5	3	9.18378	8.48666	8.45454	8.82789	8.41925	39.375
TGVEG_319570;TGME49_319570;TGGT1_319570	WD domain, G-beta repeat-containing protein	N/A	0	NaN	23.8937	NaN	NaN	NaN			2.4077e-06	1	4.2	1	1	0	0	7.4368	7.19271	7.07022	NaN	NaN	59.768
TGVEG_319850;TGME49_319850;TGGT1_319850	splicing factor U2AF family SnRNP auxilary factor large subunit, RRM domain-containing protein	N/A	0	0.00920296	NaN	26.7252	26.7344	NaN			1.7877e-05	7	4.4	1	2	2	1	8.60774	7.41422	8.1499	8.17929	7.93944	51.681
TGVEG_319870;TGME49_319870;TGGT1_319870	ubiquitin-conjugating enzyme subfamily protein	N/A	0	0.215774	28.3558	27.136	27.9617	NaN			1.5032e-09	8	9.3	2	2	2	1	8.96745	8.52334	8.28794	8.5617	7.55061	35.024
TGVEG_319920;TGME49_319920;TGGT1_319920	2-oxo acid dehydrogenases acyltransferase (catalytic domain) domain-containing protein	HMM: MLATRRVFSASPRLACARAGIAQAF, NN: MLATRRVFSASPRLACAR;HMM: MLATRRVFSASPRLVCARAGIAQAF, NN: MLATRRVFSASPRLVCARAGIAQAF	0	0.0802107	29.1295	29.074	29.1657	29.1982			2.8674e-76	37	23.2	6	9	9	9	9.45146	8.68062	8.87449	8.96636	8.82869	70.304
TGVEG_320010;TGME49_320010;TGGT1_320010	hypothetical protein	N/A	0	NaN	NaN	NaN	NaN	22.3436			0.0013548	2	3.1	0	1	0	1	7.62783	NaN	7.56433	NaN	6.76138	98.23
TGVEG_320050;TGME49_320050;TGGT1_320050	ribosomal protein RPL5	N/A	0	-0.149628	32.6349	32.5421	32.4646	32.4131			1.6616e-125	141	59	15	16	15	14	10.4674	9.81194	9.92461	9.91634	9.79194	35.341
TGVEG_320110;TGME49_320110;TGGT1_320110	proliferating cell nuclear antigen PCNA2	N/A	0	NaN	NaN	26.1464	NaN	NaN			1.0021e-08	6	15	1	2	2	1	8.43681	8.051	7.9643	7.70705	7.25305	32.264
TGVEG_320210;TGME49_320210;TGGT1_320210	WD domain, G-beta repeat domain containing protein	N/A	0	NaN	NaN	NaN	NaN	25.0908			1.5972e-16	3	10.9	1	1	2	1	8.4464	7.68663	7.95401	8.00949	7.58834	56.08
TGVEG_320220;TGME49_320220;TGGT1_320220	putative ubiquinol cytochrome c oxidoreductase;ubiquinol cytochrome c oxidoreductase, putative	N/A	0	-0.292346	29.4172	29.237	29.0478	29.0217			5.3098e-71	23	29.6	5	5	6	5	9.4603	8.88505	8.82237	8.98198	8.69451	54.777
TGVEG_320430;TGME49_320430;TGGT1_320430	cell-cycle-control protein (translation regulation), putative;putative cell-cycle-control protein (translation regulation)	N/A	0	NaN	NaN	NaN	NaN	24.8753			1.1991e-09	1	1.3	0	0	0	1	7.52347	NaN	NaN	NaN	7.52347	131.32
TGVEG_320450;TGME49_320450;TGGT1_320450	ribosome biogenesis regulatory protein (rrs1) protein	N/A	0	NaN	NaN	NaN	24.0696	NaN			0.00036235	1	7.2	0	0	1	0	7.3887	NaN	NaN	7.3887	NaN	35.689
TGVEG_320480;TGME49_320480;TGGT1_320480	Rab11b	N/A	0	NaN	NaN	25.2989	NaN	NaN			1.7172e-10	2	10.2	1	1	0	0	8.04135	7.76936	7.70916	NaN	NaN	24.857
TGVEG_320600;TGME49_320600;TGGT1_320600	cold-shock DNA-binding domain-containing protein	HMM: MGVSSSKLFGWGWFSLHSRARSK, NN: MGVSSSKLFGWGWFSLHSRARSK;HMM: MGVSSSKVFGWGWFSLHSRARSK, NN: MGVSSSKVFGWGWFSLHSRARSK	0	-0.0237122	31.6391	31.5416	31.3123	31.821			7.5274e-95	52	35.4	7	5	7	4	10.1718	9.59015	9.65395	9.43064	9.57492	23.074
TGVEG_321400;TGME49_321400;TGGT1_321400	microsomal signal peptidase (spc12) domain-containing protein	N/A	2	NaN	NaN	NaN	NaN	26.2337			3.6746e-09	3	13.3	1	1	0	1	8.47227	7.93313	8.09812	NaN	7.93239	14.205
TGVEG_321420;TGME49_321420;TGGT1_321420	kelch repeat-containing protein	N/A	0	NaN	NaN	NaN	26.0783	NaN			0.000539	2	3.8	0	2	2	0	8.29916	NaN	8.00286	7.99338	NaN	61.027
TGVEG_321500;TGGT1_321500;TGME49_321500	RNA recognition motif-containing protein	N/A	0	-0.207948	31.5767	31.7983	31.5742	31.3849			1.9951e-126	77	42.3	13	10	13	12	10.1955	9.5095	9.66477	9.69315	9.46238	50.952
TGVEG_321570;TGME49_321570;TGGT1_321570	beta-hydroxyacyl-acyl carrier protein dehydratase (FABZ)	HMM: MENLILFVAVCVLSLICRSEAF, NN: MENLILFVAVCVLSLICRSEAF	0	NaN	NaN	NaN	NaN	24.2295			0.0059481	4	3.5	1	1	1	1	7.86944	7.06179	7.27131	7.35209	7.32907	24.568
TGVEG_321590;TGME49_321590;TGGT1_321590	hypothetical protein;putative transmembrane protein	N/A	6	NaN	NaN	24.6431	NaN	NaN			0.0012326	2	6.7	0	2	0	0	7.51174	NaN	7.51174	NaN	NaN	42.431
TGVEG_321620;TGME49_321620;TGGT1_321620	dynamin gtpase;dynamin-related protein DRPB	N/A	0;1	-0.0610933	29.2324	29.3473	29.1208	29.3368			6.5402e-97	60	22	12	12	12	11	9.4805	8.81694	8.95388	8.89585	8.83338	95.93
TGVEG_321640;TGME49_321640;TGGT1_321640	cell division protein CDC48AP	HMM: MGPAWCPLEGAGWDSSASSFRRGLGLRRLLSLSIFLLLPFPFIFLSPAHAV, NN: MGPAWCPLEGAGWDSSASSFRRGLGLRRLLSLSIFLLLPFPFIFLSPAHAV;HMM: MGTAWCPLEGAGWDSSASSFRRGLGLRRLLSLSVFLLLPFPFIFLSPAHAV, NN: MGTAWCPLEGAGWDSSASSFRRGLGLRRLLSLSVFLLLPFPFIFLSPAHAV	1	NaN	NaN	22.9256	NaN	NaN			3.043e-17	2	5.3	1	1	1	0	7.48678	6.91172	6.99474	7.10158	NaN	112.87
TGVEG_321680;TGME49_321680;TGGT1_321680	hyaluronan/mRNA-binding family protein;hypothetical protein	N/A	0	-0.211129	30.9429	30.5388	30.6655	30.394			4.2793e-173	69	41.7	14	14	15	13	9.90317	9.2492	9.27841	9.42297	9.22523	40.688
TGVEG_324600;TGME49_232940;TGGT1_324600;TGME49_324600	heat shock protein;heat shock protein HSP20	N/A	0	-0.198019	31.8152	31.795	31.7047	31.5095		+	5.7463e-61	99	56.8	13	12	12	12	10.2341	9.59927	9.68924	9.7492	9.42602	20.266
TGVEG_360830	nucleoside-triphosphatase	N/A	0	NaN	NaN	NaN	NaN	29.2945			2.6526e-240	7	76.2	1	1	1	1	9.55	8.91947	8.91573	9.07173	8.85378	40.505
TGVEG_440110;TGME49_277240	NTPase;NTPase I	HMM: MWLPVYVPLLLVFGVSLSLPQGSLGT, NN: MWLPVYVPLLLVFGVSLSLPQGSLGT	0	-0.106595	30.6457	30.8136	30.6518	30.5943			3.005e-172	25	58.6	2	2	2	2	9.91512	9.17719	9.41317	9.41429	9.18633	41.139
TGVEG_442220	rhoptry protein ROP5	HMM: MATKLARLATWLVLVGCLLWRAGAV, NN: MATKLARLATWLVLVGCLLWRAGAV	0	NaN	NaN	NaN	27.7077	NaN			4.5366e-182	6	41	1	2	2	1	9.02494	8.20227	8.66155	8.4839	8.13446	60.905
TGVEG_442760;TGME49_237120;TGME49_323400	cytochrome C family oxidase subunit III subfamily protein;cytochrome c oxidase subunit iii subfamily protein;hypothetical protein	N/A	3;4;6	NaN	NaN	NaN	24.9562	NaN			0.0017347	0	7.3	1	1	1	0	8.20833	7.62207	7.87177	7.65557	NaN	16.775
