# Supplementary material for: Profiling of myristoylation in Toxoplasma gondii reveals an N-myristoylated protein important for host cell penetration
Source: eLife. 2020 Jul 3;9:e57861. doi: 10.7554/eLife.57861 (PMC7373427; doi:10.7554/eLife.57861)
Supplement: Supplementary file 2. — Identification of myristoylated proteins and myristoylated peptides in T. gondii. Sheet 1: Toxoplasma proteins bearing the MG motif. Sheet 2: Substrates significantly enriched with Trypsin reagent (2). Sheet 3: Substrates selected based on fold change in YnMyr/Myr enrichment with TEV reagent (3). Sheet 4: Myristoylated peptides found with Trypsin reagent (2). Sheet 5: Myristoylated peptides found with TEV reagent (3). Sheet 6: Human proteins bearing the MG motif. Sheet 7: Human substrates significantly enriched with Trypsin and TEV reagents. [file elife-57861-supp2.xlsx]

## Sheet: Legend
Supplementary file 2: Identification of myristoylated proteins and myristoylated peptides in Toxoplasma gondii
Human foreskin fibroblasts were treated for 16 h with 25 µM YnMyr or 25 µM Myr upon infection with Toxoplasma. Following cell lysis, tagged proteins were captured with reagent 2 or 3 (each in triplicate), treated with NaOH and enriched on streptavidin beads. Pulled down proteins were digested with trypsin (reagent 2) or trypsin and TEV protease (reagent 3) and analyzed by LC-MS/MS. The data were …
Sheet 1: Toxoplasma proteins bearing the MG motif
The data were filtered to remove host proteins and for the presence of the MG motif. To calculate YnMyr/Myr enrichment the data were further filtered for the presence of 2 valid values in YnMyr treated samples and the missing LFQ intensities were imputed from the normal distribution (separately for each reagent). For reagent 2, a modified t-test (FDR = 0.01, Log2 FC YnMyr/Myr >2 ) was used to sel…
Sheet 2: Substrates significantly enriched with Trypsin reagent (2)
The data were filtered to retain only protein IDs which passed the t-test criteria (FDR = 0.01, Log2 FC YnMyr/Myr >2). T-test parameters, -log10 p-value and t-test difference (corresponding to log2 FC YnMyr/Myr) are given for each protein ID.
Sheet 3: Substrates selected based on fold change in YnMyr/Myr enrichment with TEV reagent (3)
The data were filtered to retain only protein IDs for which Log2 FC YnMyr/Myr >2.
Sheet 4: Myristoylated peptides found with Trypsin reagent (2)
A list of identified myristoylated peptides passing selection tresholds (delta score > 20 and MS/MS spectra inspection) found with Trypsin cleavable reagent. Identification parameters like Andromeda score, PEP, delta score (the difference between the highest scoring ID and the second best one) are given for each peptide.
Sheet 5: Myristoylated peptides found with TEV reagent (3)
A list of identified myristoylated peptides passing selection tresholds (delta score > 20 and MS/MS spectra inspection) found with TEV cleavable reagent. Identification parameters like Andromeda score, PEP, delta score (the difference between the highest scoring ID and the second best one) are given for each peptide.
Sheet 6: Human proteins bearing the MG motif
The data were filtered to remove parasite proteins and for the presence of the MG myristoylation motif. To calculate YnMyr/Myr enrichment the data were further filtered for the presence of 2 valid values in YnMyr treated samples and the missing LFQ intensities were imputed from the normal distribution (separately for each reagent). For reagent 2, a modified t-test (FDR = 0.01, Log2 FC YnMyr/Myr >…
Sheet 7: Human substrates significantly enriched with Trypsin and TEV reagents
The data were filtered to retain only protein IDs which passed the t-test criteria (FDR = 0.01, Log2 FC YnMyr/Myr >2) and log2 FC YnMyr/Myr >2 based selection for reagent 2 and 3, respectively. Protein IDs were annotated with the published human myristoylated proteome data (Thinon et al. 2014, Broncel et al. 2015 and Castrec et al. 2018).

## Sheet: Toxo MG proteins
Protein IDs	Protein name	Signal Peptide	# TM Domains	LFQ intensity Trypsin_Myr1	LFQ intensity Trypsin_Myr2	LFQ intensity Trypsin_Myr3	LFQ intensity Trypsin_YnMyr1	LFQ intensity Trypsin_YnMyr2	LFQ intensity Trypsin_YnMyr3	LFQ intensity TEV_Myr1	LFQ intensity TEV_Myr2	LFQ intensity TEV_YnMyr1	LFQ intensity TEV_YnMyr2	LFQ intensity TEVII_Myr1	LFQ intensity TEVII_YnMyr1	Imputed LFQ intensity Trypsin_Myr1	Imputed LFQ intensity Trypsin_Myr2	Imputed LFQ intensity Trypsin_Myr3	Imputed LFQ intensity Trypsin_YnMyr1	Imputed LFQ intensity Trypsin_YnMyr2	Imputed LFQ intensity Trypsin_YnMyr3	Imputed LFQ intensity TEV_Myr1	Imputed LFQ intensity TEV_Myr2	Imputed LFQ intensity TEV_YnMyr1	Imputed LFQ intensity TEV_YnMyr2	Imputed LFQ intensity TEVII_Myr1	Imputed LFQ intensity TEVII_YnMyr1	MG motif	Log10 t-test p value Trypsin * (-1)	Log2 FC YnMyr/Myr Trypsin	t-test Significant Trypsin	Log2 FC YnMyr/Myr TEV	TEV selection Log2 FC >2	N3-biotin selection Log2 FC >2	Base sensitive	Myr peptide TEV	Myr peptide Trypsin	Myr peptide total	Palmitoylated (Foe et al. 2015)	Palmitoylated (Caballero et al. 2016)	P. falciparum myristoylated (Wright et al. 2014)	PEP	MS/MS Count	Sequence coverage [%]	Total Intensity	Intensity Trypsin_Myr1	Intensity Trypsin_Myr2	Intensity Trypsin_Myr3	Intensity Trypsin_YnMyr1
TGVEG_213800;TGME49_213800;TGGT1_213800	protein phosphatase 2b regulatory subunit, putative;putative protein phosphatase 2b regulatory subunit	N/A	0	NaN	NaN	NaN	27.7833	27.1667	27.563	NaN	NaN	26.4641	26.1239	NaN	27.8484	21.8834	19.2627	19.4514	27.7833	27.1667	27.563	21.4568	22.4897	26.4641	26.1239	22.0194	27.8484	+	3.27286	7.3052	+	4.82355	+	+							+	1.3267e-148	76	64.4	9.37987	NaN	NaN	NaN	8.87833
TGVEG_223940;TGGT1_223940;TGME49_223940	GAP45;GAP45 protein	N/A	0	23.8205	23.3058	24.1934	32.8701	33.0158	32.9269	NaN	NaN	33.6853	33.7615	NaN	32.8897	23.8205	23.3058	24.1934	32.8701	33.0158	32.9269	20.7489	20.6651	33.6853	33.7615	21.8636	32.8897	+	5.70844	9.1644	+	12.353	+	+			+	+	+	+	+	0	346	76.3	10.9933	7.15458	7.09757	7.16566	10.3377
TGGT1_232340;TGVEG_232340;TGME49_232340	protein phosphatase 2C domain-containing protein	N/A	0	NaN	NaN	NaN	30.5805	30.5892	30.6909	NaN	NaN	28.0271	27.885	NaN	30.4548	20.6842	20.5556	20.586	30.5805	30.5892	30.6909	21.1837	19.8682	28.0271	27.885	21.6499	30.4548	+	8.64306	10.0116	+	7.8884	+	+			+	+			+	0	282	59.8	10.2397	NaN	NaN	NaN	9.71996
TGVEG_237820;TGME49_237820;TGGT1_237820	IMC sub-compartment protein ISP2	N/A	0	NaN	NaN	NaN	28.3932	28.5906	28.505	NaN	NaN	30.3571	30.1304	NaN	28.166	19.4076	21.5341	19.2716	28.3932	28.5906	28.505	22.326	22.6469	30.3571	30.1304	22.1362	28.166	+	3.7823	8.42519	+	7.18147	+	+						+	+	1.289e-128	95	71.2	9.78067	NaN	NaN	NaN	9.16179
TGVEG_240550;TGME49_240550;TGGT1_240550	copper chaperone COX17-1, putative;putative copper chaperone COX17-1	N/A	0	NaN	NaN	NaN	24.8439	25.1373	24.8823	NaN	NaN	24.9608	25.5731	NaN	23.6672	21.2981	19.9828	21.2181	24.8439	25.1373	24.8823	21.9719	18.9161	24.9608	25.5731	22.8839	23.6672	+	3.45854	4.12147	+	3.47641	+	+		+	+	+			+	5.6116e-37	19	63.6	8.43637	NaN	NaN	NaN	7.80566
TGVEG_242070;TGME49_242070;TGGT1_242070	cAMP-dependent protein kinase regulatory subunit	N/A	0	20.2235	19.3934	20.412	31.3575	31.426	31.4866	NaN	NaN	31.632	32.1646	NaN	31.1728	20.2235	19.3934	20.412	31.3575	31.426	31.4866	22.9262	20.5413	31.632	32.1646	21.6567	31.1728	+	5.76092	11.4137	+	9.94838	+	+		+	+	+	+	+	+	0	396	66.5	10.5333	6.29587	6.43299	6.24082	9.9424
TGVEG_249970;TGME49_249970;TGGT1_249970	hypothetical protein	N/A	0	NaN	NaN	NaN	30.1358	29.8731	30.2373	NaN	NaN	31.1301	31.0926	NaN	29.7017	21.4289	19.1736	19.3628	30.1358	29.8731	30.2373	21.8468	20.6114	31.1301	31.0926	21.8401	29.7017	+	4.09987	10.0936	+	9.20868	+	+		+	+	+		+	+	0	137	61.1	9.97832	NaN	NaN	NaN	9.29345
TGVEG_260820;TGME49_260820;TGGT1_260820	IMC sub-compartment protein ISP1	N/A	0	NaN	NaN	NaN	29.7909	29.9212	29.9523	NaN	NaN	31.2865	31.2308	NaN	29.8943	21.0557	20.5548	19.6718	29.7909	29.9212	29.9523	21.7806	20.8055	31.2865	31.2308	21.6523	29.8943	+	4.99115	9.46067	+	9.39107	+	+		+	+	+		+	+	0	146	86.9	10.0302	NaN	NaN	NaN	9.30133
TGVEG_261440;TGME49_261440;TGGT1_261440	ARM repeats containing protein	N/A	0	NaN	NaN	NaN	28.6154	28.8031	28.7792	NaN	NaN	27.4183	27.411	NaN	28.1829	20.6569	20.3864	20.2832	28.6154	28.8031	28.7792	21.5599	20.0127	27.4183	27.411	22.254	28.1829	+	6.7954	8.29037	+	6.39518	+	+			+	+	+	+	+	0	100	58.4	9.65597	NaN	NaN	NaN	9.08962
TGVEG_267080;TGGT1_267080;TGME49_267080	26S protease regulatory subunit 4, putative;putative 26S protease regulatory subunit 4	N/A	0	NaN	NaN	NaN	30.0096	30.1231	30.0164	NaN	NaN	27.688	28.1338	NaN	29.8244	20.6486	20.3663	21.5222	30.0096	30.1231	30.0164	23.0565	21.5039	27.688	28.1338	22.1592	29.8244	+	5.20728	9.20399	+	6.30887	+	+							+	0	264	71.9	10.0774	NaN	NaN	NaN	9.56436
TGGT1_267100;TGVEG_267100;TGME49_267100	protein phosphatase 2C domain-containing protein	N/A	0	NaN	NaN	NaN	25.9277	26.1266	25.8405	NaN	NaN	25.9295	25.1012	NaN	25.6349	20.4386	20.149	20.5494	25.9277	26.1266	25.8405	22.4091	22.1522	25.9295	25.1012	22.0058	25.6349	+	5.85176	5.58591	+	3.36616	+	+							+	1.8871e-152	88	38.7	8.86557	NaN	NaN	NaN	8.33465
TGVEG_276140;TGGT1_276140;TGME49_276140	ADP ribosylation factor ARF1	N/A	0	NaN	NaN	NaN	30.152	28.8759	30.5182	NaN	NaN	28.9941	29.1204	NaN	29.0978	21.601	21.3521	21.0461	30.152	28.8759	30.5182	22.419	21.1818	28.9941	29.1204	20.149	29.0978	+	4.38065	8.51564	+	7.82083	+	+						+	+	0	161	84.2	10.1487	NaN	NaN	NaN	9.60972
TGVEG_305860;TGME49_305860;TGGT1_305860	calcium-dependent protein kinase CDPK3	N/A	0	NaN	NaN	NaN	30.5291	30.4453	30.2864	NaN	NaN	27.6538	27.7735	NaN	30.0164	21.0928	21.5305	21.0067	30.5291	30.4453	30.2864	21.4356	21.003	27.6538	27.7735	23.0759	30.0164	+	6.38828	9.21025	+	6.64301	+	+			+	+		+	+	0	242	65.4	10.1712	NaN	NaN	NaN	9.68594
TGVEG_313380;TGME49_313380;TGGT1_313380	hypothetical protein	N/A	0	NaN	NaN	NaN	28.8562	29.4748	29.1404	NaN	NaN	28.9571	28.8042	NaN	28.7765	22.397	21.0093	21.189	28.8562	29.4748	29.1404	21.6191	21.6772	28.9571	28.8042	21.9657	28.7765	+	4.37093	7.62535	+	7.09193	+	+					+	+	+	0	173	82.5	9.83908	NaN	NaN	NaN	9.26055
TGVEG_316540;TGME49_316540;TGGT1_316540	IMC sub-compartment protein ISP3	N/A	0	NaN	NaN	NaN	31.3174	31.1538	31.1999	NaN	NaN	32.3601	32.4671	NaN	30.5606	21.8281	21.8307	22.0063	31.3174	31.1538	31.1999	22.5576	20.8431	32.3601	32.4671	20.3583	30.5606	+	7.86946	9.33532	+	10.543	+	+		+	+	+	+	+	+	3.0573e-207	164	80.5	10.2947	NaN	NaN	NaN	9.54755
TGGT1_207830;TGVEG_207830;TGME49_207830	MORN repeat-containing protein	N/A	0	NaN	NaN	NaN	27.6822	27.8088	27.7138	NaN	NaN	28.6	29.0299	NaN	27.616	21.8104	20.8479	21.0285	27.6822	27.8088	27.7138	21.382	20.3284	28.6	29.0299	22.1228	27.616	+	4.88649	6.50594	+	7.13755	+	+						+		0	100	64.8	9.42566	NaN	NaN	NaN	8.80042
TGME49_211630;TGGT1_211630;TGVEG_211630	hypothetical protein	N/A	0	NaN	NaN	NaN	28.0264	27.7789	28.0403	NaN	NaN	29.7415	29.6133	NaN	27.5218	21.759	21.2999	21.4782	28.0264	27.7789	28.0403	23.2521	21.9667	29.7415	29.6133	21.461	27.5218	+	5.9611	6.43617	+	6.73229	+	+					+			0	84	75.1	9.52244	NaN	NaN	NaN	8.87457
TGME49_212210;TGGT1_212210;TGVEG_212210	hypothetical protein	N/A	0	NaN	NaN	NaN	23.4543	23.6351	23.7214	NaN	NaN	27.3924	26.2353	NaN	22.1095	20.7662	21.5156	21.6927	23.4543	23.6351	23.7214	22.8056	20.3925	27.3924	26.2353	21.8071	22.1095	+	3.12326	2.27876	+	3.57733	+			+		+				1.1383e-73	15	43.2	8.345	NaN	NaN	NaN	7.2467
TGVEG_214575;TGME49_214575;TGGT1_214575	hypothetical protein	N/A	0	NaN	NaN	NaN	27.7355	27.441	27.5775	NaN	NaN	29.2312	28.8575	NaN	26.3721	21.1449	20.5616	20.7437	27.7355	27.441	27.5775	23.2538	19.9594	29.2312	28.8575	22.1391	26.3721	+	5.7123	6.76791	+	6.36949	+	+								1.4847e-46	77	66.3	9.44579	NaN	NaN	NaN	8.8902
TGVEG_232280;TGGT1_232280;TGME49_232280	hypothetical protein	N/A	0	NaN	NaN	NaN	30.0331	30.021	30.0237	NaN	NaN	31.2261	31.3905	NaN	29.989	21.609	21.3603	20.7377	30.0331	30.021	30.0237	22.8031	20.0738	31.2261	31.3905	21.3822	29.989	+	5.64704	8.79027	+	9.44887	+	+			+	+		+		0	215	92.7	10.2041	NaN	NaN	NaN	9.54502
TGGT1_232815;TGVEG_232815;TGME49_232815	Erv1 / Alr family protein	N/A	0	NaN	NaN	NaN	24.9555	24.9108	24.8236	NaN	NaN	25.3263	25.0434	NaN	24.155	20.0158	20.4031	19.8978	24.9555	24.9108	24.8236	21.0075	22.5882	25.3263	25.0434	22.7134	24.155	+	5.45885	4.79105	+	2.7385	+			+		+				1.3813e-36	23	25.5	8.52542	NaN	NaN	NaN	7.9362
TGGT1_233030;TGVEG_233030;TGME49_233030	gliding-associated protein GAP70	N/A	0	NaN	NaN	NaN	26.6787	26.6089	26.8151	NaN	NaN	27.6763	27.7227	NaN	26.6765	21.4536	19.7114	21.3783	26.6787	26.6089	26.8151	23.3382	21.696	27.6763	27.7227	21.367	26.6765	+	3.59055	5.85316	+	5.22477	+	+								6.6561e-122	33	20.6	9.18455	NaN	NaN	NaN	8.62321
TGGT1_235490;TGME49_235490;TGVEG_235490	high-temperature-induced dauer-formation protein;hypothetical protein	N/A	1	NaN	NaN	NaN	28.0175	27.8418	28.0216	NaN	NaN	25.8734	25.4938	NaN	27.772	20.5624	21.8213	20.4606	28.0175	27.8418	28.0216	21.4257	22.1202	25.8734	25.4938	22.0407	27.772	+	4.33764	7.01216	+	4.51756	+	+								7.8885e-293	151	42.4	9.44	NaN	NaN	NaN	8.95003
TGVEG_242570;TGME49_242570;TGGT1_242570	hypothetical protein	N/A	0	NaN	NaN	NaN	26.7703	26.725	26.6577	NaN	NaN	24.9759	24.0471	NaN	26.5353	20.2528	19.9567	20.1419	26.7703	26.725	26.6577	21.5843	20.8239	24.9759	24.0471	21.5232	26.5353	+	6.94001	6.60052	+	3.87566	+	+								2.7268e-182	95	33.3	9.04661	NaN	NaN	NaN	8.52069
TGGT1_243800;TGVEG_243800;TGME49_243800	long-chain fatty acid CoA ligase, putative;putative long-chain fatty acid CoA ligase	N/A	0	NaN	NaN	NaN	30.7806	30.5808	30.6987	NaN	NaN	27.6356	26.8734	NaN	30.2757	21.3588	21.1014	21.2806	30.7806	30.5808	30.6987	21.8264	18.5386	27.6356	26.8734	23.2893	30.2757	+	7.49846	9.43977	+	7.04346	+	+		+	+	+				0	448	67.7	10.2563	NaN	NaN	NaN	9.74695
TGVEG_245710;TGME49_245710;TGGT1_245710	phosphatidylinositol-4-phosphate 5-kinase, putative;putative phosphatidylinositol-4-phosphate 5-kinase	N/A	0	NaN	NaN	NaN	26.6267	26.7321	26.5446	NaN	NaN	27.1778	26.9184	NaN	25.9842	21.452	21.1978	21.3766	26.6267	26.7321	26.5446	19.8682	18.8118	27.1778	26.9184	22.7101	25.9842	+	6.54675	5.29233	+	6.23011	+	+			+	+	+	+		1.8277e-58	47	38.5	9.09896	NaN	NaN	NaN	8.58866
TGGT1_261500;TGVEG_261500;TGME49_261500	hydrolase	N/A	0	NaN	NaN	NaN	27.7547	28.0122	27.9611	NaN	NaN	28.4556	28.5938	NaN	27.538	20.3929	20.3749	20.5694	27.7547	28.0122	27.9611	21.1314	22.0307	28.4556	28.5938	20.905	27.538	+	7.01127	7.4636	+	6.84012	+	+								0	101	44.1	9.48643	NaN	NaN	NaN	8.88593
TGVEG_261780;TGME49_261780;TGGT1_261780	microneme protein MIC7	N/A	1	NaN	NaN	NaN	27.6325	27.4816	27.5688	NaN	NaN	27.7856	28.031	NaN	27.1556	20.8166	20.1017	20.5579	27.6325	27.4816	27.5688	22.8605	20.4544	27.7856	28.031	22.9772	27.1556	+	5.60516	7.06888	+	5.56005	+	+								1.2346e-220	106	48.5	9.40547	NaN	NaN	NaN	8.90458
TGGT1_262390;TGVEG_262390;TGME49_262390	TLD protein	N/A	0	NaN	NaN	NaN	24.6541	24.6628	24.8188	NaN	NaN	25.7516	25.7567	NaN	24.3902	20.5138	21.3155	21.7215	24.6541	24.6628	24.8188	21.5098	22.054	25.7516	25.7567	21.9603	24.3902	+	3.52294	3.52832	+	3.45815	+	+		+	+	+				6.5616e-58	33	11.3	8.4098	NaN	NaN	NaN	7.6641
TGVEG_264990;TGME49_264990;TGGT1_264990	hypothetical protein	N/A	0	NaN	NaN	NaN	26.8048	26.7782	26.861	NaN	NaN	28.9645	28.7871	NaN	26.3252	20.4565	20.2025	20.1919	26.8048	26.7782	26.861	20.0842	21.6109	28.9645	28.7871	20.8373	26.3252	+	6.96883	6.53101	+	7.1815	+	+		+		+				8.6711e-141	74	56.4	9.40024	NaN	NaN	NaN	8.84174
TGVEG_265270;TGGT1_265270;TGME49_265270	hypothetical protein	N/A	0	NaN	NaN	NaN	24.0144	24.751	24.9629	NaN	NaN	25.5358	26.3206	NaN	24.1321	19.7129	20.1675	20.3864	24.0144	24.751	24.9629	22.5008	18.9839	25.5358	26.3206	21.1511	24.1321	+	3.97563	4.4872	+	4.45092	+				+	+				2.2638e-25	22	19.8	8.38922	NaN	NaN	NaN	7.7178
TGGT1_281580;TGVEG_281580;TGME49_281580	PP2C, putative;putative PP2C	N/A	0	NaN	NaN	NaN	25.2021	25.3471	25.377	NaN	NaN	26.3539	26.4244	NaN	25.5199	20.0065	19.7018	20.8233	25.2021	25.3471	25.377	22.1331	20.2527	26.3539	26.4244	23.1595	25.5199	+	4.25489	5.13149	+	4.251	+	+								2.3771e-85	40	25.1	8.65458	NaN	NaN	NaN	8.06885
TGVEG_285190;TGGT1_285190;TGME49_285190	zinc finger, C3HC4 type (RING finger) domain-containing protein	N/A	0	NaN	NaN	NaN	25.9556	26.1947	26.0444	NaN	NaN	NaN	23.7841	NaN	25.7291	20.6165	20.3331	21.8477	25.9556	26.1947	26.0444	21.337	21.3011	22.7185	23.7841	22.109	25.7291	+	3.69928	5.1325	+	2.49486	+	+								1.4313e-71	46	17.7	8.84277	NaN	NaN	NaN	8.28411
TGVEG_289615;TGGT1_289615;TGME49_289615	hypothetical protein	N/A	0	NaN	NaN	NaN	23.8544	24.0919	23.872	NaN	NaN	26.3909	25.9076	NaN	23.7653	21.189	20.9256	19.9465	23.8544	24.0919	23.872	21.5915	20.8869	26.3909	25.9076	21.9418	23.7653	+	3.26665	3.25243	+	3.88123	+				+	+				7.3375e-19	17	41.6	8.39562	NaN	NaN	NaN	7.80611
TGGT1_292120;TGVEG_292120;TGME49_292120	membrane occupation and recognition nexus protein MORN2	N/A	0	NaN	NaN	NaN	27.7324	27.6403	27.7282	NaN	NaN	29.9914	29.9676	NaN	27.1543	20.8771	20.6028	21.2219	27.7324	27.6403	27.7282	21.8804	20.9784	29.9914	29.9676	21.6171	27.1543	+	5.81846	6.79967	+	7.54585	+	+						+		0	129	76.1	9.56291	NaN	NaN	NaN	8.91895
TGVEG_293470;TGME49_293470;TGGT1_293470	hypothetical protein;immune mapped protein 1	N/A	0	NaN	NaN	NaN	28.7529	28.7649	28.7454	NaN	NaN	29.2969	29.4643	NaN	28.4457	20.4585	20.1033	20.3537	28.7529	28.7649	28.7454	21.0962	20.0663	29.2969	29.4643	22.9425	28.4457	+	7.13732	8.44921	+	7.70065	+	+			+	+		+		0	175	79.8	9.70403	NaN	NaN	NaN	9.09684
TGVEG_297150;TGME49_297150;TGGT1_297150	MORN repeat-containing protein	N/A	0	NaN	NaN	NaN	24.5431	25.0083	24.9007	NaN	NaN	24.6842	24.6849	NaN	24.0687	19.365	20.5483	19.2277	24.5431	25.0083	24.9007	21.0532	22.2842	24.6842	24.6849	20.8235	24.0687	+	3.79365	5.10368	+	3.09228	+	+					+	+		5.3495e-42	33	35.5	8.48896	NaN	NaN	NaN	7.89438
TGVEG_301440;TGME49_301440;TGGT1_301440	calcium-dependent protein kinase CDPK1	N/A	0	NaN	NaN	NaN	31.2614	31.3242	31.2837	NaN	NaN	28.444	28.2832	NaN	31.0851	21.0179	21.8654	20.9296	31.2614	31.3242	31.2837	23.0777	20.9128	28.444	28.2832	20.949	31.0851	+	5.62678	10.0188	+	7.62426	+	+		+	+	+		+		0	308	54.6	10.4357	5.99076	6.08682	6.09486	9.92457
TGVEG_310420;TGME49_310420;TGGT1_310420	hypothetical protein	N/A	0	NaN	NaN	NaN	28.5883	28.4541	28.1868	NaN	NaN	29.701	28.5879	NaN	27.2752	20.8646	20.5899	20.7718	28.5883	28.4541	28.1868	21.8637	20.6004	29.701	28.5879	22.3762	27.2752	+	6.44185	7.66765	+	6.90794	+	+		+	+	+	+			2.9983e-72	32	26.2	9.45873	NaN	NaN	NaN	8.8287
TGGT1_310930;TGVEG_310930;TGME49_310930	hypothetical protein	N/A	0	NaN	NaN	NaN	25.3076	25.0895	25.1498	NaN	NaN	26.3936	26.209	NaN	24.7339	20.4081	20.5571	20.7392	25.3076	25.0895	25.1498	22.3144	20.5819	26.3936	26.209	21.7729	24.7339	+	5.92733	4.61416	+	4.22244	+			+		+				2.4794e-53	35	17.5	8.70946	NaN	NaN	NaN	8.15848
TGGT1_313290;TGVEG_313290;TGME49_313290	MORN repeat-containing protein	N/A	0	NaN	NaN	NaN	28.4297	28.3264	28.6324	NaN	NaN	30.4798	30.5753	NaN	28.2091	21.2698	21.0804	21.2598	28.4297	28.3264	28.6324	21.6349	22.5357	30.4798	30.5753	21.2931	28.2091	+	6.81842	7.25952	+	7.93354	+	+		+	+	+				0	150	68.1	9.74368	NaN	NaN	NaN	9.03993
TGME49_319510;TGGT1_319510;TGVEG_319510	hypothetical protein	N/A	0	NaN	NaN	NaN	27.2042	27.3367	27.3469	NaN	NaN	29.0971	29.0796	NaN	26.973	21.0671	21.1153	21.2945	27.2042	27.3367	27.3469	21.4993	21.1813	29.0971	29.0796	22.2441	26.973	+	6.99769	6.13698	+	6.74171	+	+		+	+	+				1.8321e-281	90	73.6	9.34221	NaN	NaN	NaN	8.59292
TGVEG_320760;TGME49_320760;TGGT1_320760	hypothetical protein	N/A	0	NaN	NaN	NaN	26.7193	26.9543	26.9072	NaN	NaN	26.5063	26.7213	NaN	26.6521	20.0202	20.7164	20.8977	26.7193	26.9543	26.9072	20.0374	19.1618	26.5063	26.7213	21.5904	26.6521	+	4.96068	6.31549	+	6.36338	+	+								3.0992e-127	86	50.7	9.16224	NaN	NaN	NaN	8.59665
TGVEG_285980;TGME49_285980;TGGT1_285980B	glucosephosphate-mutase GPM1	N/A	0	NaN	NaN	NaN	30.7762	30.7413	30.8703	NaN	NaN	28.6563	29.0405	NaN	30.8152	21.8411	21.1333	21.3124	30.7762	30.7413	30.8703	20.8862	19.6571	28.6563	29.0405	20.4827	30.8152	+	6.07343	9.36699	+	9.16203	+	+								0	311	67.5	10.3135	6.19457	NaN	NaN	9.75885
TGVEG_240630;TGME49_240630;TGGT1_240630	ULK kinase	N/A	0	NaN	NaN	NaN	24.3781	24.2064	24.3108	NaN	NaN	NaN	NaN	NaN	NaN	20.9148	19.9684	20.8235	24.3781	24.2064	24.3108	NaN	NaN	NaN	NaN	NaN	NaN	+	3.88856	3.72954	+	NaN				+		+			+	2.2167e-31	16	20.6	8.23729	NaN	NaN	NaN	7.80539
TGVEG_261980;TGGT1_261980;TGME49_261980	gorasp2-prov protein	N/A	0	NaN	NaN	NaN	23.5216	23.4256	23.5478	NaN	NaN	NaN	NaN	NaN	23.1336	21.7869	20.5402	20.2861	23.5216	23.4256	23.5478	NaN	NaN	NaN	NaN	NaN	NaN	+	2.61587	2.62724	+	NaN		+							+	2.7303e-55	20	28.8	8.08846	NaN	NaN	NaN	7.63971
TGGT1_262490;TGVEG_262490;TGME49_262490	alpha/beta hydrolase, putative;putative alpha/beta hydrolase	N/A	0	NaN	NaN	NaN	25.6833	25.7668	25.7895	NaN	NaN	NaN	NaN	NaN	25.1598	21.1546	20.5203	20.4106	25.6833	25.7668	25.7895	NaN	NaN	NaN	NaN	NaN	NaN	+	4.86502	5.05138	+	NaN		+			+	+			+	1.9372e-52	33	41.9	8.73046	NaN	NaN	NaN	8.24524
TGVEG_267440;TGME49_267440;TGGT1_267440	RING zinc finger protein	N/A	0	NaN	NaN	NaN	24.6907	24.9623	24.9534	NaN	NaN	NaN	NaN	NaN	24.5456	20.5497	20.264	19.7383	24.6907	24.9623	24.9534	NaN	NaN	NaN	NaN	NaN	NaN	+	4.59631	4.6848	+	NaN		+							+	4.6381e-54	36	32.8	8.47991	NaN	NaN	NaN	7.95876
TGVEG_291800;TGME49_291800;TGGT1_291800	ADP-ribosylation factor family protein	N/A	0	NaN	NaN	NaN	24.3119	24.8946	24.7444	NaN	NaN	NaN	NaN	NaN	24.158	21.4353	21.1806	21.4094	24.3119	24.8946	24.7444	NaN	NaN	NaN	NaN	NaN	NaN	+	4.47326	3.30853	+	NaN		+					+	+	+	7.6012e-41	30	32.7	8.40468	NaN	NaN	NaN	7.84167
TGME49_207460;TGVEG_207460B;TGGT1_207460B	Rab5B protein	N/A	0	NaN	NaN	NaN	27.1497	27.0326	27.1213	NaN	NaN	22.8481	NaN	NaN	26.5959	21.3792	19.7397	19.926	27.1497	27.0326	27.1213	22.1326	20.2493	22.8481	21.7534	23.2011	26.5959	+	3.99563	6.75287	+	1.87144		+							+	1.11e-213	61	62.3	9.15168	NaN	NaN	NaN	8.66822
TGVEG_299970;TGME49_299970	tetratricopeptide repeat-containing protein	N/A	0	NaN	NaN	NaN	26.3278	26.4949	26.4326	NaN	NaN	NaN	NaN	NaN	25.5579	21.0738	19.5917	19.7787	26.3278	26.4949	26.4326	NaN	NaN	NaN	NaN	NaN	NaN	+	4.04507	6.27039	+	NaN		+							+	9.8619e-120	49	41.6	9.02061	NaN	NaN	NaN	8.48199
TGVEG_203160;TGME49_203160;TGGT1_203160	hypothetical protein	N/A	0	NaN	NaN	NaN	24.1729	23.8835	24.0413	NaN	NaN	NaN	NaN	NaN	NaN	20.5009	20.2134	20.3973	24.1729	23.8835	24.0413	NaN	NaN	NaN	NaN	NaN	NaN	+	5.48486	3.66202	+	NaN		+								5.2182e-39	24	23.9	8.15509	NaN	NaN	NaN	7.69809
TGVEG_209450;TGME49_209450;TGGT1_209450	TLD protein	N/A	0	NaN	NaN	NaN	26.2115	26.1609	26.0116	NaN	NaN	NaN	NaN	NaN	25.8011	20.8858	21.5688	21.7457	26.2115	26.1609	26.0116	NaN	NaN	NaN	NaN	NaN	NaN	+	4.51234	4.7279	+	NaN		+								4.4472e-297	46	28	8.87466	NaN	NaN	NaN	8.50835
TGVEG_219710;TGGT1_219710;TGME49_219710	hypothetical protein	N/A	0	NaN	NaN	NaN	26.2252	26.2299	26.1164	NaN	NaN	NaN	23.1343	NaN	25.4668	21.4268	20.8648	21.3507	26.2252	26.2299	26.1164	21.1747	21.7012	21.4669	23.1343	21.822	25.4668	+	5.29412	4.97641	+	1.79007		+		+	+	+				8.3494e-279	98	24	8.88632	NaN	NaN	NaN	8.37166
TGVEG_228750;TGGT1_228750;TGME49_228750	calcium dependent protein kinase CDPK7	N/A	0	NaN	NaN	NaN	24.5026	24.4065	24.701	NaN	NaN	NaN	NaN	NaN	24.2726	21.4164	21.161	21.3537	24.5026	24.4065	24.701	NaN	NaN	NaN	NaN	NaN	NaN	+	5.3057	3.22634	+	NaN		+								2.1841e-76	29	5.5	8.3834	NaN	NaN	NaN	7.91563
TGVEG_238150;TGME49_238150;TGGT1_238150	hypothetical protein;putative transmembrane protein	N/A	8	NaN	NaN	NaN	23.5057	23.8254	23.6069	NaN	NaN	NaN	NaN	NaN	23.6685	20.988	20.8041	20.8988	23.5057	23.8254	23.6069	NaN	NaN	NaN	NaN	NaN	NaN	+	5.14627	2.74905	+	NaN		+						+		1.1189e-22	9	10.9	8.12538	NaN	NaN	NaN	7.60069
TGVEG_246580;TGME49_246580;TGGT1_246580	hypothetical protein;putative transmembrane protein	HMM: MGECAILAICLVVFFAVLMSF, NN: MGECAILAICLVVFFAVLMSFDYRDGI	1	NaN	NaN	NaN	23.5316	23.4711	23.5699	NaN	NaN	NaN	NaN	NaN	22.8748	21.1439	20.879	21.0594	23.5316	23.4711	23.5699	NaN	NaN	NaN	NaN	NaN	NaN	+	5.43386	2.49676	+	NaN		+					+	+		2.6584e-21	24	23.8	8.06138	NaN	NaN	NaN	7.58256
TGGT1_269990;TGVEG_269990;TGME49_269990	hypothetical protein	N/A	0	NaN	NaN	NaN	24.7959	24.9601	24.8611	NaN	NaN	NaN	NaN	NaN	24.9286	21.3737	21.1167	19.9938	24.7959	24.9601	24.8611	NaN	NaN	NaN	NaN	NaN	NaN	+	3.46264	4.0443	+	NaN		+								1.998e-113	42	9.7	8.51311	NaN	NaN	NaN	7.93385
TGVEG_271380;TGGT1_271380;TGME49_271380	PUB domain-containing protein	N/A	0	NaN	NaN	NaN	24.4948	24.3322	24.4416	NaN	NaN	NaN	NaN	NaN	24.1989	21.3686	21.1115	19.8967	24.4948	24.3322	24.4416	NaN	NaN	NaN	NaN	NaN	NaN	+	3.1699	3.63063	+	NaN		+								5.251e-40	34	18.9	8.35009	NaN	NaN	NaN	7.89213
TGVEG_277870;TGME49_277870;TGGT1_277870	hypothetical protein	N/A	0	NaN	NaN	NaN	24.8541	24.7556	25.0599	NaN	NaN	NaN	NaN	NaN	24.4806	20.2952	20.0006	21.5301	24.8541	24.7556	25.0599	NaN	NaN	NaN	NaN	NaN	NaN	+	3.37016	4.28123	+	NaN		+		+		+				2.4234e-60	30	25	8.49049	NaN	NaN	NaN	8.04485
TGVEG_290200;TGME49_290200;TGGT1_290200	NAD/NADP octopine/nopaline dehydrogenase, alpha-helical domain-containing protein	HMM: MGAPSPVAAGVAARTKSPLLTVCVCGGGNSAHAVAA, NN: MGAPSPVAAGVAARTKSPLLTV	0	NaN	NaN	NaN	23.9467	24.0207	24.0835	NaN	NaN	NaN	NaN	NaN	23.5292	20.0716	19.7691	20.9713	23.9467	24.0207	24.0835	NaN	NaN	NaN	NaN	NaN	NaN	+	3.60356	3.74634	+	NaN		+						+		2.3666e-38	34	25.5	8.2132	NaN	NaN	NaN	7.73965
TGVEG_309990;TGME49_309990;TGGT1_309990	hypothetical protein;putative transmembrane protein	HMM: MGNMCAICFNPGKAASCSCFNLAVAVLLFAVYYGLVGGM, NN: MGNMCAICFNPGKAASCSCFNLAVAVLLFAVYYGLVGGM	4	NaN	NaN	NaN	25.8807	26.1998	25.9176	NaN	NaN	NaN	NaN	NaN	26.3953	20.668	20.3864	20.5694	25.8807	26.1998	25.9176	NaN	NaN	NaN	NaN	NaN	NaN	+	6.01372	5.45811	+	NaN				+	+	+				3.2447e-25	10	16.3	8.86912	NaN	NaN	NaN	8.27425
TGVEG_311360;TGME49_311360;TGGT1_311360	protein kinase G AGC kinase family member PKG	N/A	0	NaN	NaN	NaN	26.5777	26.5145	26.555	NaN	NaN	NaN	NaN	NaN	26.6486	20.7952	20.6556	20.8371	26.5777	26.5145	26.555	NaN	NaN	NaN	NaN	NaN	NaN	+	7.52132	5.78642	+	NaN		+								1.0225e-212	110	34.5	9.01737	NaN	NaN	NaN	8.53801
TGGT1_262450;TGVEG_262450;TGME49_262450	dyggve-melchior-clausen syndrome protein;hypothetical protein	N/A	0	NaN	NaN	NaN	22.6352	22.5834	22.4057	NaN	NaN	NaN	NaN	NaN	22.3188	20.7974	20.2268	21.4937	22.6352	22.5834	22.4057	NaN	NaN	NaN	NaN	NaN	NaN	+	2.28832	1.70215		NaN					+	+				1.8558e-37	11	5.5	7.77721	NaN	NaN	NaN	7.28049
TGGT1_260850;TGVEG_260850;TGME49_260850	mitochondrial import inner membrane translocase subunit TIM10, putative;putative mitochondrial import inner membrane translocase subunit TIM10	N/A	0	NaN	NaN	NaN	22.3006	22.2495	23.5684	NaN	NaN	25.1431	24.876	NaN	NaN	20.3901	20.7877	20.7369	22.3006	22.2495	23.5684	21.8107	20.5128	25.1431	24.876	22.3492	22.5714	+	2.30122	2.0679		2.63926	+		+							2.5082e-69	24	67.9	8.08817	NaN	NaN	NaN	7.44778
TGVEG_300000;TGME49_300000;TGGT1_300000	ribosomal protein RPL18	N/A	0	28.3064	28.4464	27.7722	27.3329	27.1591	27.1819	25.1537	NaN	28.7414	28.6029	28.1963	27.0096	28.3064	28.4464	27.7722	27.3329	27.1591	27.1819	25.1537	21.043	28.7414	28.6029	28.1963	27.0096	+	0.00240768	-0.950365		3.32028	+		+					+		2.7129e-120	93	48.1	9.53874	8.49525	8.60673	8.31228	8.76017
TGVEG_228470;TGME49_228470;TGGT1_228470	ribosomal protein RPL15	N/A	0	25.01	24.5913	24.6579	24.4459	23.846	25.066	NaN	NaN	23.735	24.2307	23.7551	24.7628	25.01	24.5913	24.6579	24.4459	23.846	25.066	22.9856	18.7708	23.735	24.2307	23.7551	24.7628	+	0.11587	-0.300438		2.40565	+							+		8.7216e-22	34	25.9	8.65014	7.36421	7.35278	7.23664	8.0443
TGVEG_239330;TGME49_239330;TGGT1_239330	ribosomal protein RPL37	N/A	0	NaN	NaN	NaN	NaN	NaN	NaN	NaN	NaN	25.0986	25.3067	NaN	24.2485	NaN	NaN	NaN	NaN	NaN	NaN	22.0975	20.9937	25.0986	25.3067	20.8107	24.2485	+	NaN	NaN		3.58399	+									1.5855e-08	10	32.7	8.17006	6.76269	6.72355	6.51764	7.01578
TGVEG_295110;TGME49_295110;TGGT1_295110	rhoptry protein ROP7	HMM: MGHPTSFGQPSCLVWLAAAFLVLGLCLVQQGAGI, NN: MGHPTSFGQPSCLVWLAAAFLVLGLCLVQQGAGI	1	26.7923	27.1909	26.6581	26.3207	26.5556	26.1114	NaN	NaN	26.561	26.6257	27.2453	26.5387	26.7923	27.1909	26.6581	26.3207	26.5556	26.1114	23.2217	18.2657	26.561	26.6257	27.2453	26.5387	+	0.0120657	-0.551195		3.66426	+							+		3.5515e-101	87	35.7	9.18755	8.00462	8.41293	8.12869	8.39415
TGGT1_306660;TGVEG_306660;TGME49_306660	RNA pseudouridine synthase superfamily protein	N/A	0	NaN	NaN	NaN	22.4812	21.9406	22.0745	NaN	NaN	25.2411	24.0047	NaN	NaN	21.7734	19.4577	21.7076	22.4812	21.9406	22.0745	22.0142	20.2982	25.2411	24.0047	22.5853	22.4378	+	0.995079	1.18589		2.26199	+									3.114e-12	14	0.8	7.93524	NaN	NaN	NaN	7.32758
TGGT1_220320;TGVEG_220320;TGME49_220320	BSD domain-containing protein	N/A	0	NaN	NaN	NaN	24.0378	24.1507	24.1272	NaN	NaN	NaN	23.0728	NaN	24.045	21.6105	20.6931	20.6242	24.0378	24.1507	24.1272	22.5782	19.6276	21.7132	23.0728	23.2241	24.045	+	3.51492	3.1293	+	1.13374									+	7.6535e-45	23	35.4	8.26937	NaN	NaN	NaN	7.659
TGGT1_204050;TGVEG_204050;TGME49_204050	subtilisin SUB1	HMM: MGSSHAIVACAALIVLLSTNARGL, NN: MGSSHAIVACAALIVLLSTNARGL	0	NaN	NaN	NaN	24.481	24.4105	24.399	NaN	NaN	NaN	NaN	NaN	24.6759	20.5596	20.2742	20.4578	24.481	24.4105	24.399	NaN	NaN	NaN	NaN	NaN	NaN	+	6.16741	3.99963	+	NaN		+	+							2.2105e-41	29	19.4	8.375	6.07824	6.06423	6.00017	7.86095
TGVEG_205330;TGME49_205330;TGGT1_205330	hypothetical protein;putative transmembrane protein	N/A	8	NaN	NaN	NaN	22.7225	22.9211	22.9576	NaN	NaN	NaN	NaN	NaN	22.7102	20.9724	20.7014	20.8828	22.7225	22.9211	22.9576	NaN	NaN	NaN	NaN	NaN	NaN	+	4.61285	2.01487	+	NaN			+				+			1.3858e-38	11	16	7.89348	NaN	NaN	NaN	7.39201
TGGT1_222960;TGVEG_222960;TGME49_222960	SCY kinase-related protein (incomplete catalytic triad)	N/A	0	NaN	NaN	NaN	23.2106	22.9961	23.3525	NaN	NaN	NaN	NaN	NaN	22.6852	21.0125	20.7429	20.4588	23.2106	22.9961	23.3525	NaN	NaN	NaN	NaN	NaN	NaN	+	3.97623	2.44832	+	NaN										1.8583e-40	23	11.4	7.97071	NaN	NaN	NaN	7.52166
TGGT1_226700;TGVEG_226700;TGME49_226700	nuclease, putative;putative nuclease	N/A	0	NaN	NaN	NaN	24.6582	24.5957	24.4995	NaN	NaN	NaN	NaN	NaN	24.4114	22.1357	21.9055	20.2595	24.6582	24.5957	24.4995	NaN	NaN	NaN	NaN	NaN	NaN	+	2.52163	3.15092	+	NaN										2.7906e-58	25	26.7	8.4019	NaN	NaN	NaN	7.92873
TGVEG_229670;TGME49_229670;TGGT1_229670	ribosomal protein RPS23	N/A	0	NaN	NaN	NaN	23.6433	23.7757	23.8749	NaN	NaN	NaN	NaN	NaN	24.0334	21.0277	20.7586	20.3763	23.6433	23.7757	23.8749	NaN	NaN	NaN	NaN	NaN	NaN	+	4.26019	3.04376	+	NaN										6.9857e-20	16	37.8	8.2315	NaN	7.07467	6.89556	7.62967
TGVEG_235750;TGME49_235750;TGGT1_235750	ULK kinase	N/A	0	NaN	NaN	NaN	24.1348	24.1363	24.2065	NaN	NaN	NaN	NaN	NaN	23.7659	21.3349	20.7945	21.256	24.1348	24.1363	24.2065	NaN	NaN	NaN	NaN	NaN	NaN	+	4.5344	3.03074	+	NaN										1.8959e-30	18	22.9	8.27453	NaN	NaN	NaN	7.82921
TGGT1_247690;TGVEG_247690;TGME49_247690	phospholipid-translocating P-type ATPase, flippase subfamily protein	N/A	8	NaN	NaN	NaN	23.3158	23.27	23.1677	NaN	NaN	NaN	NaN	NaN	23.0627	20.8203	20.544	20.7262	23.3158	23.27	23.1677	NaN	NaN	NaN	NaN	NaN	NaN	+	5.2978	2.55431	+	NaN										1.281e-24	24	5.3	7.99845	NaN	NaN	NaN	7.53685
TGVEG_271270;TGME49_271270;TGGT1_271270	hypothetical protein;putative transmembrane protein	N/A	1	NaN	NaN	NaN	22.8271	22.7089	22.9374	NaN	NaN	NaN	NaN	NaN	23.4427	20.0147	19.7103	20.3746	22.8271	22.7089	22.9374	NaN	NaN	NaN	NaN	NaN	NaN	+	4.09118	2.79124	+	NaN										8.7425e-16	12	9.3	7.95406	NaN	NaN	NaN	7.44381
TGVEG_288720;TGME49_288720;TGGT1_288720	ribosomal protein RPL10	N/A	0	NaN	NaN	NaN	23.1386	23.2105	23.6008	NaN	NaN	NaN	NaN	NaN	NaN	20.3762	20.0844	20.7182	23.1386	23.2105	23.6008	NaN	NaN	NaN	NaN	NaN	NaN	+	3.93731	2.92372	+	NaN								+		7.8258e-15	12	27.6	8.06062	6.66015	6.67829	6.35732	7.44871
TGVEG_297060;TGME49_297060;TGGT1_297060	phosphoglycerate mutase PGMII	N/A	0	NaN	NaN	NaN	22.7823	22.974	22.763	NaN	NaN	NaN	NaN	NaN	NaN	21.0924	20.0336	21.0063	22.7823	22.974	22.763	NaN	NaN	NaN	NaN	NaN	NaN	+	2.75164	2.12898	+	NaN										1.6947e-14	7	19.2	7.82234	5.94225	6.00143	5.82267	7.33244
TGVEG_262860;TGGT1_262860;TGME49_262860	ADP-ribosylation factor family protein 1, putative;putative ADP-ribosylation factor family protein 1	N/A	0	NaN	NaN	NaN	22.6077	22.5293	22.9447	NaN	NaN	NaN	NaN	NaN	NaN	20.1575	21.2403	21.0704	22.6077	22.5293	22.9447	NaN	NaN	NaN	NaN	NaN	NaN	+	2.48837	1.87119		NaN									+	1.4482e-30	10	45	7.77325	NaN	NaN	NaN	7.19385
TGVEG_226860;TGGT1_226860	SAG-related sequence SRS67	HMM: MAFRKPLFSGRQWVALMCVFAAVGGK, NN: MAFRKPLFSGRQWVALMCVFAAVGGK;HMM: MGFRKPVFSGRQWVALMCVFAAVGGK, NN: MGFRKPVFSGRQWVALMCVFAAVGGK	1	NaN	NaN	NaN	NaN	NaN	NaN	NaN	NaN	NaN	NaN	NaN	21.6651	NaN	NaN	NaN	NaN	NaN	NaN	NaN	NaN	NaN	NaN	NaN	NaN	+	NaN	NaN		NaN			+							1.6742e-12	3	27.1	7.42126	NaN	NaN	NaN	6.78342
TGVEG_204020;TGME49_204020;TGGT1_204020	ribosomal protein RPL8	N/A	0	24.5135	24.0041	24.4392	24.0819	24.2707	24.3652	NaN	NaN	NaN	NaN	NaN	24.1191	24.5135	24.0041	24.4392	24.0819	24.2707	24.3652	NaN	NaN	NaN	NaN	NaN	NaN	+	0.180421	-0.0796712		NaN								+		3.0645e-36	38	34.2	8.4774	7.00082	7.14706	7.14996	7.87769
TGGT1_205040;TGME49_205040;TGVEG_205040	PGAP1 family protein	N/A	8	NaN	NaN	NaN	22.1397	21.5854	21.9749	NaN	NaN	NaN	NaN	NaN	21.5879	20.7302	20.4508	20.6334	22.1397	21.5854	21.9749	NaN	NaN	NaN	NaN	NaN	NaN	+	2.97245	1.2952		NaN										1.0206e-15	12	3.9	7.59232	NaN	NaN	NaN	7.16447
TGVEG_209130;TGME49_209130;TGGT1_209130	regulator of chromosome condensation (RCC1) repeat-containing protein	HMM: MGQAATKSGVVIWGAPETTALLSASGPGSAA, NN: MGQAATKSGVVIWGAPETTALLSASGPGSAA	0	NaN	NaN	NaN	NaN	NaN	21.7862	NaN	NaN	NaN	NaN	NaN	NaN	NaN	NaN	NaN	NaN	NaN	NaN	NaN	NaN	NaN	NaN	NaN	NaN	+	NaN	NaN		NaN										2.0663e-07	4	2.9	7.34033	NaN	NaN	NaN	6.81822
TGVEG_221170A;TGME49_221170;TGGT1_221170	CAAX metallo endopeptidase	N/A	3;5	NaN	NaN	NaN	NaN	NaN	20.1577	NaN	NaN	NaN	NaN	NaN	NaN	NaN	NaN	NaN	NaN	NaN	NaN	NaN	NaN	NaN	NaN	NaN	NaN	+	NaN	NaN		NaN										0.0015453	2	5.2	7.03278	NaN	NaN	NaN	6.56535
TGVEG_226390;TGME49_226390;TGGT1_226390	hypothetical protein;PST-A-like protein	N/A	0	NaN	NaN	NaN	21.4044	NaN	NaN	NaN	NaN	NaN	NaN	NaN	NaN	NaN	NaN	NaN	NaN	NaN	NaN	NaN	NaN	NaN	NaN	NaN	NaN	+	NaN	NaN		NaN										1.3531e-06	2	2.8	7.06172	NaN	NaN	NaN	6.90897
TGVEG_230350;TGME49_230350;TGGT1_230350	hypothetical protein;putative transmembrane protein	N/A	4;6	NaN	NaN	NaN	22.2685	22.0368	21.8351	NaN	NaN	NaN	NaN	NaN	NaN	19.7445	19.4307	20.7252	22.2685	22.0368	21.8351	NaN	NaN	NaN	NaN	NaN	NaN	+	2.45084	2.08004		NaN								+		3.0252e-18	8	7.8	7.55913	NaN	NaN	NaN	6.94557
TGVEG_234180;TGME49_234180;TGGT1_234180	hypothetical protein	N/A	0	NaN	NaN	NaN	19.3988	19.4144	NaN	NaN	NaN	NaN	NaN	NaN	NaN	20.5015	21.4922	20.3979	19.3988	19.4144	18.5888	NaN	NaN	NaN	NaN	NaN	NaN	+	0.00432642	-1.66324		NaN										0.00012209	2	11.1	6.68247	NaN	NaN	NaN	6.30679
TGGT1_235478;TGME49_235478;TGVEG_235478	pantothenate kinase	N/A	0;2	NaN	NaN	NaN	NaN	NaN	19.4743	NaN	NaN	NaN	NaN	NaN	NaN	NaN	NaN	NaN	NaN	NaN	NaN	NaN	NaN	NaN	NaN	NaN	NaN	+	NaN	NaN		NaN										0.0037659	1	0.7	6.82229	NaN	NaN	NaN	6.30473
TGVEG_237150;TGME49_237150;TGGT1_237150	minor histocompatibility antigen h13, putative;putative minor histocompatibility antigen h13	N/A	8	NaN	NaN	NaN	NaN	NaN	22.0769	NaN	NaN	NaN	NaN	NaN	NaN	NaN	NaN	NaN	NaN	NaN	NaN	NaN	NaN	NaN	NaN	NaN	NaN	+	NaN	NaN		NaN										1.9115e-11	5	5	7.28569	NaN	NaN	NaN	6.63554
TGME49_237890;TGGT1_237890;TGVEG_237890	calcium-dependent protein kinase CDPK4	N/A	0	NaN	NaN	NaN	21.3008	NaN	21.5273	NaN	NaN	NaN	NaN	NaN	NaN	20.1093	19.082	19.9941	21.3008	19.6191	21.5273	NaN	NaN	NaN	NaN	NaN	NaN	+	1.0289	1.0873		NaN										1.0011e-14	8	4.7	7.38398	NaN	NaN	NaN	6.81261
TGGT1_238040B;TGVEG_238040B;TGVEG_442580;TGGT1_411630;TGVEG_238040A;TGGT1_238040A;TGME49_238040	disulfide-isomerase domain protein;protein disulfide-isomerase domain-containing protein	HMM: MEVCFQSWWRCLALAGYSLFSTAISR, NN: MEVCFQSWWRCLALAGYSLFSTAISR;N/A	0;1	NaN	NaN	NaN	NaN	NaN	NaN	NaN	NaN	NaN	NaN	23.9728	NaN	NaN	NaN	NaN	NaN	NaN	NaN	NaN	NaN	NaN	NaN	NaN	NaN	+	NaN	NaN		NaN										0.00012496	2	11.3	7.2861	NaN	NaN	NaN	NaN
TGGT1_244450;TGVEG_244450B;TGME49_244450;TGVEG_244450A	protein phosphatase 2C domain-containing protein	HMM: MPTFCSTFPARLAIPRLLAVLLLLGLWHGRAP, NN: MPTFCSTFPARLAIPRLLAVLLLLGLWHGRAPE;N/A	0	24.5952	23.6304	23.9161	22.4186	22.3561	22.3417	NaN	NaN	NaN	NaN	23.928	NaN	24.5952	23.6304	23.9161	22.4186	22.3561	22.3417	NaN	NaN	NaN	NaN	NaN	NaN	+	0.000934899	-1.67512		NaN										2.0189e-28	16	5.2	8.18794	7.37405	7.14079	7.22688	7.05538
TGVEG_245460;TGME49_245460;TGGT1_245460	ribosomal protein RPS8	N/A	0	24.731	24.6441	24.7062	24.7771	24.8533	24.8385	NaN	NaN	NaN	NaN	23.7472	24.8848	24.731	24.6441	24.7062	24.7771	24.8533	24.8385	NaN	NaN	NaN	NaN	NaN	NaN	+	1.98664	0.129193		NaN								+		1.5005e-115	48	49.3	8.63834	7.45917	7.47214	7.32533	7.9538
TGVEG_246540;TGME49_246540;TGGT1_246540	cytochrome c1, heme protein	N/A	1	NaN	NaN	NaN	22.8542	22.8566	22.6193	NaN	NaN	NaN	NaN	NaN	NaN	21.8374	21.5967	21.7735	22.8542	22.8566	22.6193	NaN	NaN	NaN	NaN	NaN	NaN	+	3.51027	1.04081		NaN										1.9123e-18	11	13.3	7.7792	NaN	NaN	NaN	7.37938
TGVEG_253940;TGME49_253940;TGGT1_253940	CAM Kinase family, incomplete catalytic triad	N/A	0	NaN	NaN	NaN	23.1593	22.9661	22.8621	NaN	NaN	NaN	NaN	NaN	22.7148	20.2979	21.3725	21.5505	23.1593	22.9661	22.8621	NaN	NaN	NaN	NaN	NaN	NaN	+	2.36267	1.92221		NaN										3.6745e-21	16	16	7.92354	NaN	NaN	NaN	7.5023
TGGT1_255195	hypothetical protein	N/A	0	NaN	NaN	NaN	NaN	NaN	19.7084	NaN	NaN	NaN	NaN	NaN	NaN	NaN	NaN	NaN	NaN	NaN	NaN	NaN	NaN	NaN	NaN	NaN	NaN	+	NaN	NaN		NaN										9.7633e-07	3	7	6.78121	NaN	NaN	NaN	6.39138
TGVEG_259550;TGME49_259550;TGGT1_259550	dihydropteroate synthase	HMM: MGCWPPSFACLRLSWWNLPLFHKRSAFFFWPPPGLRLRPLPGGAIAHCASSR, NN: MGCWPPSFACLRLSWWNLPLFHKRSAFFFWPPPGLRLR;HMM: MGCWPPSFACLRLSWWNLPLFHKRSAFFFWPPPGLRLRSLPGGAIAHCASSR, NN: MGCWPPSFACLRLSWWNLPLFHKRSAFFFWPPPGLRLR	0	NaN	NaN	NaN	21.8756	22.2071	21.5996	NaN	NaN	NaN	NaN	NaN	21.7022	20.9652	20.3353	20.9158	21.8756	22.2071	21.5996	NaN	NaN	NaN	NaN	NaN	NaN	+	2.20357	1.15533		NaN										3.6448e-16	14	11.5	7.61406	NaN	NaN	NaN	7.10192
TGVEG_260260;TGME49_260260;TGGT1_260260	ribosomal protein RPP1	N/A	0	NaN	NaN	NaN	NaN	NaN	19.1943	NaN	NaN	NaN	NaN	NaN	NaN	NaN	NaN	NaN	NaN	NaN	NaN	NaN	NaN	NaN	NaN	NaN	NaN	+	NaN	NaN		NaN										0.0043469	2	10.6	6.69813	NaN	NaN	NaN	6.20309
TGVEG_267060;TGME49_267060;TGGT1_267060	ribosomal protein RPL14	N/A	0	NaN	NaN	NaN	21.6569	22.3691	22.4408	NaN	NaN	NaN	NaN	NaN	NaN	21.5934	21.3442	20.6729	21.6569	22.3691	22.4408	NaN	NaN	NaN	NaN	NaN	NaN	+	1.5048	0.95211		NaN										1.841e-09	10	19.7	7.68805	6.27681	6.22693	6.2058	7.00587
TGME49_267280;TGGT1_267280;TGVEG_267280	hypothetical protein	N/A	0	NaN	NaN	NaN	NaN	NaN	18.9798	NaN	NaN	NaN	NaN	NaN	NaN	NaN	NaN	NaN	NaN	NaN	NaN	NaN	NaN	NaN	NaN	NaN	NaN	+	NaN	NaN		NaN										0.0024444	1	2.2	6.54731	NaN	NaN	NaN	6.03707
TGVEG_268960;TGME49_268960;TGGT1_268960	5'-AMP-activated protein kinase subunit beta-1 family protein, putative;putative 5'-AMP-activated protein kinase subunit beta-1 family protein	N/A	0	NaN	NaN	NaN	20.259	20.319	20.4223	NaN	NaN	NaN	NaN	NaN	NaN	21.0978	20.8312	20.3713	20.259	20.319	20.4223	NaN	NaN	NaN	NaN	NaN	NaN	+	0.0262104	-0.433303		NaN										0.00014692	3	7.2	7.0278	NaN	NaN	NaN	6.55174
TGVEG_269780;TGME49_269780;TGGT1_269780	ADP-ribosylation factor, putative;putative ADP-ribosylation factor	N/A	0	NaN	NaN	NaN	20.7645	20.6676	21.2281	NaN	NaN	NaN	NaN	NaN	NaN	20.109	19.8078	20.3564	20.7645	20.6676	21.2281	NaN	NaN	NaN	NaN	NaN	NaN	+	1.8615	0.795677		NaN								+		1.754e-08	7	24.8	7.23629	NaN	NaN	NaN	6.68111
TGVEG_270300;TGME49_270300;TGGT1_270300	hypothetical protein;zinc finger, ZZ type protein	N/A	0	NaN	NaN	NaN	20.361	20.3251	NaN	NaN	NaN	NaN	NaN	NaN	NaN	19.8834	19.5744	21.296	20.361	20.3251	19.775	NaN	NaN	NaN	NaN	NaN	NaN	+	0.24825	-0.0975787		NaN										1.4731e-05	2	4.6	6.93814	NaN	NaN	NaN	6.59843
TGVEG_273120;TGME49_273120;TGGT1_273120;TGVEG_273110;TGME49_273110;TGGT1_273110	SAG-related sequence SRS30C;SAG-related sequence SRS30D	N/A	0;1	NaN	NaN	NaN	22.2004	22.7831	22.4082	NaN	NaN	NaN	NaN	NaN	NaN	21.4471	21.1927	19.8006	22.2004	22.7831	22.4082	NaN	NaN	NaN	NaN	NaN	NaN	+	1.7251	1.65044		NaN										0.00032568	5	4.8	7.72932	NaN	NaN	NaN	7.1518
TGVEG_283850;TGME49_283850;TGGT1_283850	peptidyl-prolyl cis-trans isomerase	N/A	0	NaN	NaN	NaN	23.2299	23.1611	23.3766	NaN	NaN	NaN	NaN	NaN	23.0843	20.8751	20.6007	21.9423	23.2299	23.1611	23.3766	NaN	NaN	NaN	NaN	NaN	NaN	+	2.46035	2.11651		NaN								+		2.5259e-17	15	17.7	7.99589	NaN	NaN	NaN	7.43818
TGVEG_291890;TGME49_291890;TGGT1_291890	microneme protein MIC1	HMM: MGQALFLTVLLPVLFGVGPEAYGE, NN: MGQALFLTVLLPVLFGV	0	NaN	NaN	NaN	20.2772	20.8569	21.0644	NaN	NaN	NaN	NaN	NaN	NaN	21.2039	20.9411	21.3595	20.2772	20.8569	21.0644	NaN	NaN	NaN	NaN	NaN	NaN	+	0.0400503	-0.435336		NaN								+		5.3164e-05	6	3.9	7.24232	NaN	NaN	NaN	6.56905
TGVEG_295125;TGGT1_295125;TGME49_295125	rhoptry protein ROP4	HMM: MGHPTSFGQPSCLVWLAAAFLVLGLCLVQQGAGI, NN: MGHPTSFGQPSCLVWLAAAFLVLGLCLVQQGAGI;HMM: MGHPTSFGQPSCLVWLAAAFLVLGLCLVQQGAGR, NN: MGHPTSFGQPSCLVWLAAAFLVLGLCLVQQGAGR	1	NaN	NaN	NaN	NaN	NaN	NaN	NaN	NaN	NaN	NaN	NaN	20.8848	NaN	NaN	NaN	NaN	NaN	NaN	NaN	NaN	NaN	NaN	NaN	NaN	+	NaN	NaN		NaN								+		4.6169e-41	6	24.1	7.45527	6.43133	6.42954	6.23875	6.72967
TGVEG_295760;TGME49_295760;TGGT1_295760	calcium-dependent protein kinase CDPK4A	N/A	0	NaN	NaN	NaN	22.1214	22.2963	22.2923	NaN	NaN	NaN	NaN	NaN	NaN	21.5368	20.8256	21.4639	22.1214	22.2963	22.2923	NaN	NaN	NaN	NaN	NaN	NaN	+	2.13737	0.961193		NaN										5.1119e-22	15	14.4	7.61613	NaN	NaN	NaN	7.08232
TGGT1_297960B;TGVEG_297960B;TGME49_297960	rhoptry neck protein RON6	HMM: MGGRATTSGARSLALPLLALFKPSFVLLFFLSSAVSSGLAG, NN: MGGRATTSGARSLALPLLALFKPSFVLLFFLSSAVSSGLAG;N/A	0;1	NaN	NaN	21.6821	NaN	NaN	NaN	NaN	NaN	NaN	NaN	NaN	NaN	NaN	NaN	NaN	NaN	NaN	NaN	NaN	NaN	NaN	NaN	NaN	NaN	+	NaN	NaN		NaN										0.0018928	2	1.3	6.78592	NaN	6.54464	6.41559	NaN
TGVEG_307990;TGGT1_307990;TGME49_307990	arrestin (or s-antigen), n-terminal domain-containing protein	N/A	0	NaN	NaN	NaN	21.666	21.9857	21.9104	NaN	NaN	NaN	NaN	NaN	NaN	20.8566	21.4007	20.7636	21.666	21.9857	21.9104	NaN	NaN	NaN	NaN	NaN	NaN	+	2.03286	0.847037		NaN								+		1.2601e-09	7	8.6	7.50983	NaN	NaN	NaN	7.01657
TGVEG_310190;TGME49_310190;TGGT1_310190	PIK3R4 kinase-related protein (incomplete catalytic triad)	N/A	0	NaN	NaN	NaN	21.8685	21.732	21.9282	NaN	NaN	NaN	NaN	NaN	NaN	22.0038	21.7689	21.9448	21.8685	21.732	21.9282	NaN	NaN	NaN	NaN	NaN	NaN	+	0.133395	-0.0629241		NaN										3.7128e-15	11	1.7	7.5558	NaN	NaN	NaN	7.08973
TGVEG_316140;TGME49_316140;TGGT1_316140	hypothetical protein;reactive oxygen species modulator 1	N/A	2	NaN	NaN	NaN	NaN	NaN	NaN	NaN	NaN	NaN	NaN	20.6202	NaN	NaN	NaN	NaN	NaN	NaN	NaN	NaN	NaN	NaN	NaN	NaN	NaN	+	NaN	NaN		NaN										0.0020052	3	5.3	6.48137	NaN	NaN	6.05603	NaN
TGVEG_258870;TGME49_258870	hypothetical protein;putative transmembrane protein	N/A	1;2	NaN	NaN	NaN	20.8568	20.713	20.3082	NaN	NaN	NaN	NaN	NaN	NaN	20.7809	19.9019	20.0873	20.8568	20.713	20.3082	NaN	NaN	NaN	NaN	NaN	NaN	+	0.817249	0.369291		NaN										1.1506e-08	10	6.1	7.25293	6.14301	6.15201	5.97296	6.72493
TGVEG_294800;TGVEG_286420;TGME49_294800;TGME49_286420;TGGT1_286420A;TGGT1_294800A;TGGT1_294800B;TGGT1_359490;TGGT1_286420B	elongation factor 1-alpha;elongation factor 1-alpha (EF-1-ALPHA), putative;putative elongation factor 1-alpha (EF-1-ALPHA)	N/A	0	28.5886	28.8272	28.8483	29.1283	29.1542	28.693	26.2044	24.7625	27.621	27.1179	28.4419	28.2376	28.5886	28.8272	28.8483	29.1283	29.1542	28.693	26.2044	24.7625	27.621	27.1179	28.4419	28.2376	+	0.923832	0.237118		1.18921								+		1.8833e-226	232	67.9	9.8731	8.54475	8.74507	8.62325	9.24903
[truncated: 22 more columns]

## Sheet: Trypsin significant
Protein IDs	Protein name	Signal Peptide	# TM Domains	LFQ intensity Trypsin_Myr1	LFQ intensity Trypsin_Myr2	LFQ intensity Trypsin_Myr3	LFQ intensity Trypsin_YnMyr1	LFQ intensity Trypsin_YnMyr2	LFQ intensity Trypsin_YnMyr3	Imputed LFQ intensity Trypsin_Myr1	Imputed LFQ intensity Trypsin_Myr2	Imputed LFQ intensity Trypsin_Myr3	Imputed LFQ intensity Trypsin_YnMyr1	Imputed LFQ intensity Trypsin_YnMyr2	Imputed LFQ intensity Trypsin_YnMyr3	MG motif	Log10 t-test p value Trypsin * (-1)	T-test difference Trypsin	t-test Significant Trypsin	Base sensitive	Myr peptideTrypsin	Palmitoylated (Foe et al.)	Palmitoylated (Caballero et al.)	P. falciparum myristoylated (Wright et al.)	PEP	MS/MS Count	Sequence coverage [%]	Total Intensity	Intensity Trypsin_Myr1	Intensity Trypsin_Myr2	Intensity Trypsin_Myr3	Intensity Trypsin_YnMyr1	Intensity Trypsin_YnMyr2	Intensity Trypsin_YnMyr3	Razor + unique peptides Trypsin_Myr1	Razor + unique peptides Trypsin_Myr2	Razor + unique peptides Trypsin_Myr3	Razor + unique peptides Trypsin_YnMyr1	Razor + unique peptides Trypsin_YnMyr2	Razor + unique peptides Trypsin_YnMyr3	Mol. weight [kDa]
TGVEG_267080;TGGT1_267080;TGME49_267080	26S protease regulatory subunit 4, putative;putative 26S protease regulatory subunit 4	N/A	0	NaN	NaN	NaN	30.0096	30.1231	30.0164	20.6486	20.3663	21.5222	30.0096	30.1231	30.0164	+	5.20728	9.20399	+					+	0	264	71.9	10.0774	NaN	NaN	NaN	9.56436	9.45626	9.5543	0	0	0	31	27	31	49.134
TGVEG_276140;TGGT1_276140;TGME49_276140	ADP ribosylation factor ARF1	N/A	0	NaN	NaN	NaN	30.152	28.8759	30.5182	21.601	21.3521	21.0461	30.152	28.8759	30.5182	+	4.38065	8.51564	+				+	+	0	161	84.2	10.1487	NaN	NaN	NaN	9.60972	9.54203	9.67829	0	0	0	13	13	13	21.062
TGVEG_291800;TGME49_291800;TGGT1_291800	ADP-ribosylation factor family protein	N/A	0	NaN	NaN	NaN	24.3119	24.8946	24.7444	21.4353	21.1806	21.4094	24.3119	24.8946	24.7444	+	4.47326	3.30853	+			+	+	+	7.6012e-41	30	32.7	8.40468	NaN	NaN	NaN	7.84167	7.86775	7.92125	0	0	0	6	6	6	22.39
TGGT1_262490;TGVEG_262490;TGME49_262490	alpha/beta hydrolase, putative;putative alpha/beta hydrolase	N/A	0	NaN	NaN	NaN	25.6833	25.7668	25.7895	21.1546	20.5203	20.4106	25.6833	25.7668	25.7895	+	4.86502	5.05138	+		+			+	1.9372e-52	33	41.9	8.73046	NaN	NaN	NaN	8.24524	8.17926	8.22259	0	0	0	8	8	9	29.068
TGVEG_261440;TGME49_261440;TGGT1_261440	ARM repeats containing protein	N/A	0	NaN	NaN	NaN	28.6154	28.8031	28.7792	20.6569	20.3864	20.2832	28.6154	28.8031	28.7792	+	6.7954	8.29037	+		+	+	+	+	0	100	58.4	9.65597	NaN	NaN	NaN	9.08962	9.09934	9.13046	0	0	0	14	15	14	30.509
TGGT1_220320;TGVEG_220320;TGME49_220320	BSD domain-containing protein	N/A	0	NaN	NaN	NaN	24.0378	24.1507	24.1272	21.6105	20.6931	20.6242	24.0378	24.1507	24.1272	+	3.51492	3.1293	+					+	7.6535e-45	23	35.4	8.26937	NaN	NaN	NaN	7.659	7.65445	7.71098	0	0	0	5	6	6	34.237
TGVEG_228750;TGGT1_228750;TGME49_228750	calcium dependent protein kinase CDPK7	N/A	0	NaN	NaN	NaN	24.5026	24.4065	24.701	21.4164	21.161	21.3537	24.5026	24.4065	24.701	+	5.3057	3.22634	+						2.1841e-76	29	5.5	8.3834	NaN	NaN	NaN	7.91563	7.73784	7.89794	0	0	0	9	8	8	219.34
TGVEG_301440;TGME49_301440;TGGT1_301440	calcium-dependent protein kinase CDPK1	N/A	0	NaN	NaN	NaN	31.2614	31.3242	31.2837	21.0179	21.8654	20.9296	31.2614	31.3242	31.2837	+	5.62678	10.0188	+		+		+		0	308	54.6	10.4357	5.99076	6.08682	6.09486	9.92457	9.87174	9.84895	1	1	1	29	28	28	65.421
TGVEG_305860;TGME49_305860;TGGT1_305860	calcium-dependent protein kinase CDPK3	N/A	0	NaN	NaN	NaN	30.5291	30.4453	30.2864	21.0928	21.5305	21.0067	30.5291	30.4453	30.2864	+	6.38828	9.21025	+		+		+	+	0	242	65.4	10.1712	NaN	NaN	NaN	9.68594	9.59976	9.58352	0	0	0	32	31	32	60.429
TGVEG_242070;TGME49_242070;TGGT1_242070	cAMP-dependent protein kinase regulatory subunit	N/A	0	20.2235	19.3934	20.412	31.3575	31.426	31.4866	20.2235	19.3934	20.412	31.3575	31.426	31.4866	+	5.76092	11.4137	+		+	+	+	+	0	396	66.5	10.5333	6.29587	6.43299	6.24082	9.9424	9.84836	9.93933	2	2	2	36	30	34	42.796
TGVEG_240550;TGME49_240550;TGGT1_240550	copper chaperone COX17-1, putative;putative copper chaperone COX17-1	N/A	0	NaN	NaN	NaN	24.8439	25.1373	24.8823	21.2981	19.9828	21.2181	24.8439	25.1373	24.8823	+	3.45854	4.12147	+		+			+	5.6116e-37	19	63.6	8.43637	NaN	NaN	NaN	7.80566	7.81811	7.78979	0	0	0	3	2	3	8.1951
TGGT1_232815;TGVEG_232815;TGME49_232815	Erv1 / Alr family protein	N/A	0	NaN	NaN	NaN	24.9555	24.9108	24.8236	20.0158	20.4031	19.8978	24.9555	24.9108	24.8236	+	5.45885	4.79105	+						1.3813e-36	23	25.5	8.52542	NaN	NaN	NaN	7.9362	7.86098	7.89931	0	0	0	4	4	4	27.622
TGVEG_223940;TGGT1_223940;TGME49_223940	GAP45;GAP45 protein	N/A	0	23.8205	23.3058	24.1934	32.8701	33.0158	32.9269	23.8205	23.3058	24.1934	32.8701	33.0158	32.9269	+	5.70844	9.1644	+		+	+	+	+	0	346	76.3	10.9933	7.15458	7.09757	7.16566	10.3377	10.3538	10.314	3	3	3	19	19	19	27.318
TGGT1_233030;TGVEG_233030;TGME49_233030	gliding-associated protein GAP70	N/A	0	NaN	NaN	NaN	26.6787	26.6089	26.8151	21.4536	19.7114	21.3783	26.6787	26.6089	26.8151	+	3.59055	5.85316	+						6.6561e-122	33	20.6	9.18455	NaN	NaN	NaN	8.62321	8.49097	8.62432	0	0	0	7	7	7	38.66
TGVEG_285980;TGME49_285980;TGGT1_285980B	glucosephosphate-mutase GPM1	N/A	0	NaN	NaN	NaN	30.7762	30.7413	30.8703	21.8411	21.1333	21.3124	30.7762	30.7413	30.8703	+	6.07343	9.36699	+						0	311	67.5	10.3135	6.19457	NaN	NaN	9.75885	9.66409	9.762	1	0	0	38	36	38	70.572
TGVEG_261980;TGGT1_261980;TGME49_261980	gorasp2-prov protein	N/A	0	NaN	NaN	NaN	23.5216	23.4256	23.5478	21.7869	20.5402	20.2861	23.5216	23.4256	23.5478	+	2.61587	2.62724	+					+	2.7303e-55	20	28.8	8.08846	NaN	NaN	NaN	7.63971	7.50938	7.52728	0	0	0	6	6	4	50.485
TGGT1_235490;TGME49_235490;TGVEG_235490	high-temperature-induced dauer-formation protein;hypothetical protein	N/A	1	NaN	NaN	NaN	28.0175	27.8418	28.0216	20.5624	21.8213	20.4606	28.0175	27.8418	28.0216	+	4.33764	7.01216	+						7.8885e-293	151	42.4	9.44	NaN	NaN	NaN	8.95003	8.80156	8.89828	0	0	0	32	29	31	102.12
TGGT1_261500;TGVEG_261500;TGME49_261500	hydrolase	N/A	0	NaN	NaN	NaN	27.7547	28.0122	27.9611	20.3929	20.3749	20.5694	27.7547	28.0122	27.9611	+	7.01127	7.4636	+						0	101	44.1	9.48643	NaN	NaN	NaN	8.88593	8.89823	8.88373	0	0	0	15	16	15	53.149
TGVEG_203160;TGME49_203160;TGGT1_203160	hypothetical protein	N/A	0	NaN	NaN	NaN	24.1729	23.8835	24.0413	20.5009	20.2134	20.3973	24.1729	23.8835	24.0413	+	5.48486	3.66202	+						5.2182e-39	24	23.9	8.15509	NaN	NaN	NaN	7.69809	7.61391	7.68414	0	0	0	9	11	10	74.801
TGME49_211630;TGGT1_211630;TGVEG_211630	hypothetical protein	N/A	0	NaN	NaN	NaN	28.0264	27.7789	28.0403	21.759	21.2999	21.4782	28.0264	27.7789	28.0403	+	5.9611	6.43617	+			+			0	84	75.1	9.52244	NaN	NaN	NaN	8.87457	8.77158	8.84676	0	0	0	12	12	12	23.612
TGME49_212210;TGGT1_212210;TGVEG_212210	hypothetical protein	N/A	0	NaN	NaN	NaN	23.4543	23.6351	23.7214	20.7662	21.5156	21.6927	23.4543	23.6351	23.7214	+	3.12326	2.27876	+						1.1383e-73	15	43.2	8.345	NaN	NaN	NaN	7.2467	7.02612	7.37212	0	0	0	4	3	4	28.897
TGVEG_214575;TGME49_214575;TGGT1_214575	hypothetical protein	N/A	0	NaN	NaN	NaN	27.7355	27.441	27.5775	21.1449	20.5616	20.7437	27.7355	27.441	27.5775	+	5.7123	6.76791	+						1.4847e-46	77	66.3	9.44579	NaN	NaN	NaN	8.8902	8.67777	8.86326	0	0	0	6	5	6	10.282
TGVEG_219710;TGGT1_219710;TGME49_219710	hypothetical protein	N/A	0	NaN	NaN	NaN	26.2252	26.2299	26.1164	21.4268	20.8648	21.3507	26.2252	26.2299	26.1164	+	5.29412	4.97641	+		+				8.3494e-279	98	24	8.88632	NaN	NaN	NaN	8.37166	8.34889	8.40475	0	0	0	28	27	28	199.78
TGVEG_232280;TGGT1_232280;TGME49_232280	hypothetical protein	N/A	0	NaN	NaN	NaN	30.0331	30.021	30.0237	21.609	21.3603	20.7377	30.0331	30.021	30.0237	+	5.64704	8.79027	+		+		+		0	215	92.7	10.2041	NaN	NaN	NaN	9.54502	9.56879	9.55611	0	0	0	20	20	20	30.148
TGVEG_242570;TGME49_242570;TGGT1_242570	hypothetical protein	N/A	0	NaN	NaN	NaN	26.7703	26.725	26.6577	20.2528	19.9567	20.1419	26.7703	26.725	26.6577	+	6.94001	6.60052	+						2.7268e-182	95	33.3	9.04661	NaN	NaN	NaN	8.52069	8.4275	8.47943	0	0	0	21	21	21	94.818
TGVEG_249970;TGME49_249970;TGGT1_249970	hypothetical protein	N/A	0	NaN	NaN	NaN	30.1358	29.8731	30.2373	21.4289	19.1736	19.3628	30.1358	29.8731	30.2373	+	4.09987	10.0936	+		+		+	+	0	137	61.1	9.97832	NaN	NaN	NaN	9.29345	9.05335	9.26827	0	0	0	12	11	12	24.712
TGVEG_264990;TGME49_264990;TGGT1_264990	hypothetical protein	N/A	0	NaN	NaN	NaN	26.8048	26.7782	26.861	20.4565	20.2025	20.1919	26.8048	26.7782	26.861	+	6.96883	6.53101	+						8.6711e-141	74	56.4	9.40024	NaN	NaN	NaN	8.84174	8.71601	8.85496	0	0	0	14	13	14	29.069
TGVEG_265270;TGGT1_265270;TGME49_265270	hypothetical protein	N/A	0	NaN	NaN	NaN	24.0144	24.751	24.9629	19.7129	20.1675	20.3864	24.0144	24.751	24.9629	+	3.97563	4.4872	+		+				2.2638e-25	22	19.8	8.38922	NaN	NaN	NaN	7.7178	7.47265	7.58672	0	0	0	5	5	5	38.43
TGGT1_269990;TGVEG_269990;TGME49_269990	hypothetical protein	N/A	0	NaN	NaN	NaN	24.7959	24.9601	24.8611	21.3737	21.1167	19.9938	24.7959	24.9601	24.8611	+	3.46264	4.0443	+						1.998e-113	42	9.7	8.51311	NaN	NaN	NaN	7.93385	7.9015	8.02053	0	0	0	12	10	12	216.02
TGVEG_277870;TGME49_277870;TGGT1_277870	hypothetical protein	N/A	0	NaN	NaN	NaN	24.8541	24.7556	25.0599	20.2952	20.0006	21.5301	24.8541	24.7556	25.0599	+	3.37016	4.28123	+						2.4234e-60	30	25	8.49049	NaN	NaN	NaN	8.04485	7.8342	8.04423	0	0	0	8	9	8	57.918
TGVEG_289615;TGGT1_289615;TGME49_289615	hypothetical protein	N/A	0	NaN	NaN	NaN	23.8544	24.0919	23.872	21.189	20.9256	19.9465	23.8544	24.0919	23.872	+	3.26665	3.25243	+		+				7.3375e-19	17	41.6	8.39562	NaN	NaN	NaN	7.80611	7.59167	7.64193	0	0	0	5	4	4	23.085
TGVEG_310420;TGME49_310420;TGGT1_310420	hypothetical protein	N/A	0	NaN	NaN	NaN	28.5883	28.4541	28.1868	20.8646	20.5899	20.7718	28.5883	28.4541	28.1868	+	6.44185	7.66765	+		+	+			2.9983e-72	32	26.2	9.45873	NaN	NaN	NaN	8.8287	8.69564	8.63752	0	0	0	3	3	3	22.925
TGGT1_310930;TGVEG_310930;TGME49_310930	hypothetical protein	N/A	0	NaN	NaN	NaN	25.3076	25.0895	25.1498	20.4081	20.5571	20.7392	25.3076	25.0895	25.1498	+	5.92733	4.61416	+						2.4794e-53	35	17.5	8.70946	NaN	NaN	NaN	8.15848	8.05119	8.10833	0	0	0	11	11	10	87.519
TGVEG_313380;TGME49_313380;TGGT1_313380	hypothetical protein	N/A	0	NaN	NaN	NaN	28.8562	29.4748	29.1404	22.397	21.0093	21.189	28.8562	29.4748	29.1404	+	4.37093	7.62535	+			+	+	+	0	173	82.5	9.83908	NaN	NaN	NaN	9.26055	9.25081	9.28999	0	0	0	19	18	19	31.512
TGME49_319510;TGGT1_319510;TGVEG_319510	hypothetical protein	N/A	0	NaN	NaN	NaN	27.2042	27.3367	27.3469	21.0671	21.1153	21.2945	27.2042	27.3367	27.3469	+	6.99769	6.13698	+		+				1.8321e-281	90	73.6	9.34221	NaN	NaN	NaN	8.59292	8.62307	8.6446	0	0	0	12	13	13	29.923
TGVEG_320760;TGME49_320760;TGGT1_320760	hypothetical protein	N/A	0	NaN	NaN	NaN	26.7193	26.9543	26.9072	20.0202	20.7164	20.8977	26.7193	26.9543	26.9072	+	4.96068	6.31549	+						3.0992e-127	86	50.7	9.16224	NaN	NaN	NaN	8.59665	8.57495	8.58671	0	0	0	17	16	16	39.389
TGVEG_293470;TGME49_293470;TGGT1_293470	hypothetical protein;immune mapped protein 1	N/A	0	NaN	NaN	NaN	28.7529	28.7649	28.7454	20.4585	20.1033	20.3537	28.7529	28.7649	28.7454	+	7.13732	8.44921	+		+		+		0	175	79.8	9.70403	NaN	NaN	NaN	9.09684	9.05038	9.08192	0	0	0	24	23	23	43.492
TGVEG_238150;TGME49_238150;TGGT1_238150	hypothetical protein;putative transmembrane protein	N/A	8	NaN	NaN	NaN	23.5057	23.8254	23.6069	20.988	20.8041	20.8988	23.5057	23.8254	23.6069	+	5.14627	2.74905	+				+		1.1189e-22	9	10.9	8.12538	NaN	NaN	NaN	7.60069	7.63946	7.5023	0	0	0	3	3	2	37.062
TGVEG_246580;TGME49_246580;TGGT1_246580	hypothetical protein;putative transmembrane protein	HMM: MGECAILAICLVVFFAVLMSF, NN: MGECAILAICLVVFFAVLMSFDYRDGI	1	NaN	NaN	NaN	23.5316	23.4711	23.5699	21.1439	20.879	21.0594	23.5316	23.4711	23.5699	+	5.43386	2.49676	+			+	+		2.6584e-21	24	23.8	8.06138	NaN	NaN	NaN	7.58256	7.50912	7.5765	0	0	0	7	7	7	42.82
TGVEG_309990;TGME49_309990;TGGT1_309990	hypothetical protein;putative transmembrane protein	HMM: MGNMCAICFNPGKAASCSCFNLAVAVLLFAVYYGLVGGM, NN: MGNMCAICFNPGKAASCSCFNLAVAVLLFAVYYGLVGGM	4	NaN	NaN	NaN	25.8807	26.1998	25.9176	20.668	20.3864	20.5694	25.8807	26.1998	25.9176	+	6.01372	5.45811	+		+				3.2447e-25	10	16.3	8.86912	NaN	NaN	NaN	8.27425	8.29667	8.26285	0	0	0	3	3	3	20.583
TGVEG_271270;TGME49_271270;TGGT1_271270	hypothetical protein;putative transmembrane protein	N/A	1	NaN	NaN	NaN	22.8271	22.7089	22.9374	20.0147	19.7103	20.3746	22.8271	22.7089	22.9374	+	4.09118	2.79124	+						8.7425e-16	12	9.3	7.95406	NaN	NaN	NaN	7.44381	7.44281	7.41977	0	0	0	6	7	6	93.148
TGVEG_260820;TGME49_260820;TGGT1_260820	IMC sub-compartment protein ISP1	N/A	0	NaN	NaN	NaN	29.7909	29.9212	29.9523	21.0557	20.5548	19.6718	29.7909	29.9212	29.9523	+	4.99115	9.46067	+		+		+	+	0	146	86.9	10.0302	NaN	NaN	NaN	9.30133	9.16533	9.28986	0	0	0	14	14	14	19.413
TGVEG_237820;TGME49_237820;TGGT1_237820	IMC sub-compartment protein ISP2	N/A	0	NaN	NaN	NaN	28.3932	28.5906	28.505	19.4076	21.5341	19.2716	28.3932	28.5906	28.505	+	3.7823	8.42519	+				+	+	1.289e-128	95	71.2	9.78067	NaN	NaN	NaN	9.16179	9.12988	9.15375	0	0	0	9	9	10	17.397
TGVEG_316540;TGME49_316540;TGGT1_316540	IMC sub-compartment protein ISP3	N/A	0	NaN	NaN	NaN	31.3174	31.1538	31.1999	21.8281	21.8307	22.0063	31.3174	31.1538	31.1999	+	7.86946	9.33532	+		+	+	+	+	3.0573e-207	164	80.5	10.2947	NaN	NaN	NaN	9.54755	9.37475	9.4792	0	0	0	11	11	11	18.39
TGGT1_243800;TGVEG_243800;TGME49_243800	long-chain fatty acid CoA ligase, putative;putative long-chain fatty acid CoA ligase	N/A	0	NaN	NaN	NaN	30.7806	30.5808	30.6987	21.3588	21.1014	21.2806	30.7806	30.5808	30.6987	+	7.49846	9.43977	+		+				0	448	67.7	10.2563	NaN	NaN	NaN	9.74695	9.67573	9.69871	0	0	0	45	47	45	83.507
TGGT1_292120;TGVEG_292120;TGME49_292120	membrane occupation and recognition nexus protein MORN2	N/A	0	NaN	NaN	NaN	27.7324	27.6403	27.7282	20.8771	20.6028	21.2219	27.7324	27.6403	27.7282	+	5.81846	6.79967	+				+		0	129	76.1	9.56291	NaN	NaN	NaN	8.91895	8.80227	8.87119	0	0	0	21	19	20	49.281
TGVEG_261780;TGME49_261780;TGGT1_261780	microneme protein MIC7	N/A	1	NaN	NaN	NaN	27.6325	27.4816	27.5688	20.8166	20.1017	20.5579	27.6325	27.4816	27.5688	+	5.60516	7.06888	+						1.2346e-220	106	48.5	9.40547	NaN	NaN	NaN	8.90458	8.64739	8.85111	0	0	0	13	12	13	36.34
TGGT1_207830;TGVEG_207830;TGME49_207830	MORN repeat-containing protein	N/A	0	NaN	NaN	NaN	27.6822	27.8088	27.7138	21.8104	20.8479	21.0285	27.6822	27.8088	27.7138	+	4.88649	6.50594	+				+		0	100	64.8	9.42566	NaN	NaN	NaN	8.80042	8.7493	8.78223	0	0	0	16	15	16	39.833
TGVEG_297150;TGME49_297150;TGGT1_297150	MORN repeat-containing protein	N/A	0	NaN	NaN	NaN	24.5431	25.0083	24.9007	19.365	20.5483	19.2277	24.5431	25.0083	24.9007	+	3.79365	5.10368	+			+	+		5.3495e-42	33	35.5	8.48896	NaN	NaN	NaN	7.89438	7.91863	8.00419	0	0	0	10	11	12	50.295
TGGT1_313290;TGVEG_313290;TGME49_313290	MORN repeat-containing protein	N/A	0	NaN	NaN	NaN	28.4297	28.3264	28.6324	21.2698	21.0804	21.2598	28.4297	28.3264	28.6324	+	6.81842	7.25952	+		+				0	150	68.1	9.74368	NaN	NaN	NaN	9.03993	8.98626	9.04607	0	0	0	22	22	22	46.04
TGVEG_290200;TGME49_290200;TGGT1_290200	NAD/NADP octopine/nopaline dehydrogenase, alpha-helical domain-containing protein	HMM: MGAPSPVAAGVAARTKSPLLTVCVCGGGNSAHAVAA, NN: MGAPSPVAAGVAARTKSPLLTV	0	NaN	NaN	NaN	23.9467	24.0207	24.0835	20.0716	19.7691	20.9713	23.9467	24.0207	24.0835	+	3.60356	3.74634	+				+		2.3666e-38	34	25.5	8.2132	NaN	NaN	NaN	7.73965	7.59573	7.68689	0	0	0	8	8	7	48.099
TGGT1_226700;TGVEG_226700;TGME49_226700	nuclease, putative;putative nuclease	N/A	0	NaN	NaN	NaN	24.6582	24.5957	24.4995	22.1357	21.9055	20.2595	24.6582	24.5957	24.4995	+	2.52163	3.15092	+						2.7906e-58	25	26.7	8.4019	NaN	NaN	NaN	7.92873	7.85786	7.80949	0	0	0	9	9	9	50.473
TGVEG_245710;TGME49_245710;TGGT1_245710	phosphatidylinositol-4-phosphate 5-kinase, putative;putative phosphatidylinositol-4-phosphate 5-kinase	N/A	0	NaN	NaN	NaN	26.6267	26.7321	26.5446	21.452	21.1978	21.3766	26.6267	26.7321	26.5446	+	6.54675	5.29233	+		+	+	+		1.8277e-58	47	38.5	9.09896	NaN	NaN	NaN	8.58866	8.51202	8.45408	0	0	0	11	11	10	31.258
TGVEG_297060;TGME49_297060;TGGT1_297060	phosphoglycerate mutase PGMII	N/A	0	NaN	NaN	NaN	22.7823	22.974	22.763	21.0924	20.0336	21.0063	22.7823	22.974	22.763	+	2.75164	2.12898	+						1.6947e-14	7	19.2	7.82234	5.94225	6.00143	5.82267	7.33244	7.35576	7.212	1	1	1	3	4	3	38.159
TGGT1_247690;TGVEG_247690;TGME49_247690	phospholipid-translocating P-type ATPase, flippase subfamily protein	N/A	8	NaN	NaN	NaN	23.3158	23.27	23.1677	20.8203	20.544	20.7262	23.3158	23.27	23.1677	+	5.2978	2.55431	+						1.281e-24	24	5.3	7.99845	NaN	NaN	NaN	7.53685	7.43712	7.43041	0	0	0	8	7	8	204.95
TGGT1_281580;TGVEG_281580;TGME49_281580	PP2C, putative;putative PP2C	N/A	0	NaN	NaN	NaN	25.2021	25.3471	25.377	20.0065	19.7018	20.8233	25.2021	25.3471	25.377	+	4.25489	5.13149	+						2.3771e-85	40	25.1	8.65458	NaN	NaN	NaN	8.06885	7.84807	8.01347	0	0	0	11	11	10	71.856
TGVEG_311360;TGME49_311360;TGGT1_311360	protein kinase G AGC kinase family member PKG	N/A	0	NaN	NaN	NaN	26.5777	26.5145	26.555	20.7952	20.6556	20.8371	26.5777	26.5145	26.555	+	7.52132	5.78642	+						1.0225e-212	110	34.5	9.01737	NaN	NaN	NaN	8.53801	8.40731	8.47355	0	0	0	28	27	27	111.24
TGVEG_213800;TGME49_213800;TGGT1_213800	protein phosphatase 2b regulatory subunit, putative;putative protein phosphatase 2b regulatory subunit	N/A	0	NaN	NaN	NaN	27.7833	27.1667	27.563	21.8834	19.2627	19.4514	27.7833	27.1667	27.563	+	3.27286	7.3052	+					+	1.3267e-148	76	64.4	9.37987	NaN	NaN	NaN	8.87833	8.66881	8.79672	0	0	0	10	10	10	19.994
TGGT1_232340;TGVEG_232340;TGME49_232340	protein phosphatase 2C domain-containing protein	N/A	0	NaN	NaN	NaN	30.5805	30.5892	30.6909	20.6842	20.5556	20.586	30.5805	30.5892	30.6909	+	8.64306	10.0116	+		+			+	0	282	59.8	10.2397	NaN	NaN	NaN	9.71996	9.65947	9.62296	0	0	0	36	37	36	60.027
TGGT1_267100;TGVEG_267100;TGME49_267100	protein phosphatase 2C domain-containing protein	N/A	0	NaN	NaN	NaN	25.9277	26.1266	25.8405	20.4386	20.149	20.5494	25.9277	26.1266	25.8405	+	5.85176	5.58591	+					+	1.8871e-152	88	38.7	8.86557	NaN	NaN	NaN	8.33465	8.28738	8.27848	0	0	0	27	24	25	96.722
TGVEG_271380;TGGT1_271380;TGME49_271380	PUB domain-containing protein	N/A	0	NaN	NaN	NaN	24.4948	24.3322	24.4416	21.3686	21.1115	19.8967	24.4948	24.3322	24.4416	+	3.1699	3.63063	+						5.251e-40	34	18.9	8.35009	NaN	NaN	NaN	7.89213	7.71906	7.81862	0	0	0	14	11	13	107.69
TGME49_207460;TGVEG_207460B;TGGT1_207460B	Rab5B protein	N/A	0	NaN	NaN	NaN	27.1497	27.0326	27.1213	21.3792	19.7397	19.926	27.1497	27.0326	27.1213	+	3.99563	6.75287	+					+	1.11e-213	61	62.3	9.15168	NaN	NaN	NaN	8.66822	8.60911	8.51493	0	0	0	13	10	12	24.677
TGVEG_288720;TGME49_288720;TGGT1_288720	ribosomal protein RPL10	N/A	0	NaN	NaN	NaN	23.1386	23.2105	23.6008	20.3762	20.0844	20.7182	23.1386	23.2105	23.6008	+	3.93731	2.92372	+				+		7.8258e-15	12	27.6	8.06062	6.66015	6.67829	6.35732	7.44871	7.30276	7.62231	2	1	1	4	2	4	24.801
TGVEG_229670;TGME49_229670;TGGT1_229670	ribosomal protein RPS23	N/A	0	NaN	NaN	NaN	23.6433	23.7757	23.8749	21.0277	20.7586	20.3763	23.6433	23.7757	23.8749	+	4.26019	3.04376	+						6.9857e-20	16	37.8	8.2315	NaN	7.07467	6.89556	7.62967	7.60637	7.64386	0	1	1	4	4	4	15.801
TGVEG_267440;TGME49_267440;TGGT1_267440	RING zinc finger protein	N/A	0	NaN	NaN	NaN	24.6907	24.9623	24.9534	20.5497	20.264	19.7383	24.6907	24.9623	24.9534	+	4.59631	4.6848	+					+	4.6381e-54	36	32.8	8.47991	NaN	NaN	NaN	7.95876	7.93409	7.93658	0	0	0	10	9	10	41.492
TGGT1_222960;TGVEG_222960;TGME49_222960	SCY kinase-related protein (incomplete catalytic triad)	N/A	0	NaN	NaN	NaN	23.2106	22.9961	23.3525	21.0125	20.7429	20.4588	23.2106	22.9961	23.3525	+	3.97623	2.44832	+						1.8583e-40	23	11.4	7.97071	NaN	NaN	NaN	7.52166	7.33724	7.50883	0	0	0	8	8	9	112.77
TGVEG_299970;TGME49_299970	tetratricopeptide repeat-containing protein	N/A	0	NaN	NaN	NaN	26.3278	26.4949	26.4326	21.0738	19.5917	19.7787	26.3278	26.4949	26.4326	+	4.04507	6.27039	+					+	9.8619e-120	49	41.6	9.02061	NaN	NaN	NaN	8.48199	8.42705	8.40226	0	0	0	13	12	13	46.498
TGVEG_209450;TGME49_209450;TGGT1_209450	TLD protein	N/A	0	NaN	NaN	NaN	26.2115	26.1609	26.0116	20.8858	21.5688	21.7457	26.2115	26.1609	26.0116	+	4.51234	4.7279	+						4.4472e-297	46	28	8.87466	NaN	NaN	NaN	8.50835	8.22071	8.34799	0	0	0	17	17	18	92.271
TGGT1_262390;TGVEG_262390;TGME49_262390	TLD protein	N/A	0	NaN	NaN	NaN	24.6541	24.6628	24.8188	20.5138	21.3155	21.7215	24.6541	24.6628	24.8188	+	3.52294	3.52832	+		+				6.5616e-58	33	11.3	8.4098	NaN	NaN	NaN	7.6641	7.57497	7.66597	0	0	0	8	8	8	148.06
TGVEG_240630;TGME49_240630;TGGT1_240630	ULK kinase	N/A	0	NaN	NaN	NaN	24.3781	24.2064	24.3108	20.9148	19.9684	20.8235	24.3781	24.2064	24.3108	+	3.88856	3.72954	+					+	2.2167e-31	16	20.6	8.23729	NaN	NaN	NaN	7.80539	7.70719	7.72037	0	0	0	7	7	7	55.715
TGVEG_235750;TGME49_235750;TGGT1_235750	ULK kinase	N/A	0	NaN	NaN	NaN	24.1348	24.1363	24.2065	21.3349	20.7945	21.256	24.1348	24.1363	24.2065	+	4.5344	3.03074	+						1.8959e-30	18	22.9	8.27453	NaN	NaN	NaN	7.82921	7.71453	7.79012	0	0	0	8	7	7	41.224
TGVEG_285190;TGGT1_285190;TGME49_285190	zinc finger, C3HC4 type (RING finger) domain-containing protein	N/A	0	NaN	NaN	NaN	25.9556	26.1947	26.0444	20.6165	20.3331	21.8477	25.9556	26.1947	26.0444	+	3.69928	5.1325	+						1.4313e-71	46	17.7	8.84277	NaN	NaN	NaN	8.28411	8.32249	8.26307	0	0	0	11	10	11	70.003

## Sheet: TEV selection
Protein IDs	Protein name	Signal Peptide	# TM Domains	LFQ intensity TEV_Myr1	LFQ intensity TEV_Myr2	LFQ intensity TEV_YnMyr1	LFQ intensity TEV_YnMyr2	LFQ intensity TEVII_Myr1	LFQ intensity TEVII_YnMyr1	Imputed LFQ intensity TEV_Myr1	Imputed LFQ intensity TEV_Myr2	Imputed LFQ intensity TEV_YnMyr1	Imputed LFQ intensity TEV_YnMyr2	Imputed LFQ intensity TEVII_Myr1	Imputed LFQ intensity TEVII_YnMyr1	MG motif	Log2 FC YnMyr/Myr TEV	TEV selection Log2 FC>2	Base sensitive	Myr peptide TEV	Palmitoylated (Foe et al.)	Palmitoylated (Caballero et al.)	P. falciparum myristoylated (Wright et al.)	PEP	MS/MS Count	Sequence coverage [%]	Total Intensity	Intensity TEV_Myr1	Intensity TEV_Myr2	Intensity TEV_YnMyr1	Intensity TEV_YnMyr2	Intensity TEVII_Myr1	Intensity TEVII_YnMyr1	Razor + unique peptides TEV_Myr1	Razor + unique peptides TEV_Myr2	Razor + unique peptides TEV_YnMyr1	Razor + unique peptides TEV_YnMyr2	Razor + unique peptides TEVII_Myr1	Razor + unique peptides TEVII_YnMyr1	Mol. weight [kDa]
TGVEG_267080;TGGT1_267080;TGME49_267080	26S protease regulatory subunit 4, putative;putative 26S protease regulatory subunit 4	N/A	0	NaN	NaN	27.688	28.1338	NaN	29.8244	23.0565	21.5039	27.688	28.1338	22.1592	29.8244	+	6.30887	+					+	0	264	71.9	10.0774	NaN	NaN	7.77444	7.95712	NaN	9.22819	0	0	14	15	0	25	49.134
TGVEG_276140;TGGT1_276140;TGME49_276140	ADP ribosylation factor ARF1	N/A	0	NaN	NaN	28.9941	29.1204	NaN	29.0978	22.419	21.1818	28.9941	29.1204	20.149	29.0978	+	7.82083	+				+	+	0	161	84.2	10.1487	7.29008	NaN	7.63751	7.61453	NaN	9.21919	1	0	5	5	0	8	21.062
TGVEG_261440;TGME49_261440;TGGT1_261440	ARM repeats containing protein	N/A	0	NaN	NaN	27.4183	27.411	NaN	28.1829	21.5599	20.0127	27.4183	27.411	22.254	28.1829	+	6.39518	+			+	+	+	0	100	58.4	9.65597	NaN	NaN	7.85718	8.07784	NaN	8.69937	0	0	6	9	0	12	30.509
TGVEG_301440;TGME49_301440;TGGT1_301440	calcium-dependent protein kinase CDPK1	N/A	0	NaN	NaN	28.444	28.2832	NaN	31.0851	23.0777	20.9128	28.444	28.2832	20.949	31.0851	+	7.62426	+		+		+		0	308	54.6	10.4357	NaN	NaN	8.36327	8.262	NaN	9.59618	0	0	15	16	0	25	65.421
TGVEG_305860;TGME49_305860;TGGT1_305860	calcium-dependent protein kinase CDPK3	N/A	0	NaN	NaN	27.6538	27.7735	NaN	30.0164	21.4356	21.003	27.6538	27.7735	23.0759	30.0164	+	6.64301	+				+	+	0	242	65.4	10.1712	NaN	NaN	8.0258	8.09531	NaN	9.28717	0	0	11	9	0	28	60.429
TGVEG_242070;TGME49_242070;TGGT1_242070	cAMP-dependent protein kinase regulatory subunit	N/A	0	NaN	NaN	31.632	32.1646	NaN	31.1728	22.9262	20.5413	31.632	32.1646	21.6567	31.1728	+	9.94838	+		+	+	+	+	0	396	66.5	10.5333	NaN	NaN	9.2828	9.45659	NaN	9.68563	0	0	25	29	0	29	42.796
TGVEG_240550;TGME49_240550;TGGT1_240550	copper chaperone COX17-1, putative;putative copper chaperone COX17-1	N/A	0	NaN	NaN	24.9608	25.5731	NaN	23.6672	21.9719	18.9161	24.9608	25.5731	22.8839	23.6672	+	3.47641	+		+			+	5.6116e-37	19	63.6	8.43637	NaN	NaN	7.40463	7.59179	NaN	7.239	0	0	3	3	0	2	8.1951
TGGT1_232815;TGVEG_232815;TGME49_232815	Erv1 / Alr family protein	N/A	0	NaN	NaN	25.3263	25.0434	NaN	24.155	21.0075	22.5882	25.3263	25.0434	22.7134	24.155	+	2.7385	+		+				1.3813e-36	23	25.5	8.52542	NaN	NaN	7.4789	7.47515	NaN	7.56879	0	0	3	3	0	3	27.622
TGVEG_223940;TGGT1_223940;TGME49_223940	GAP45;GAP45 protein	N/A	0	NaN	NaN	33.6853	33.7615	NaN	32.8897	20.7489	20.6651	33.6853	33.7615	21.8636	32.8897	+	12.353	+			+	+	+	0	346	76.3	10.9933	NaN	NaN	9.91042	9.97679	NaN	10.2001	0	0	26	25	0	20	27.318
TGGT1_233030;TGVEG_233030;TGME49_233030	gliding-associated protein GAP70	N/A	0	NaN	NaN	27.6763	27.7227	NaN	26.6765	23.3382	21.696	27.6763	27.7227	21.367	26.6765	+	5.22477	+						6.6561e-122	33	20.6	9.18455	NaN	NaN	7.98078	8.0216	NaN	8.25049	0	0	4	3	0	5	38.66
TGVEG_285980;TGME49_285980;TGGT1_285980B	glucosephosphate-mutase GPM1	N/A	0	NaN	NaN	28.6563	29.0405	NaN	30.8152	20.8862	19.6571	28.6563	29.0405	20.4827	30.8152	+	9.16203	+						0	311	67.5	10.3135	NaN	NaN	8.27616	8.37221	6.16158	9.60445	0	0	13	14	1	36	70.572
TGGT1_235490;TGME49_235490;TGVEG_235490	high-temperature-induced dauer-formation protein;hypothetical protein	N/A	1	NaN	NaN	25.8734	25.4938	NaN	27.772	21.4257	22.1202	25.8734	25.4938	22.0407	27.772	+	4.51756	+						7.8885e-293	151	42.4	9.44	NaN	NaN	7.47945	7.42452	NaN	8.58179	0	0	5	4	0	23	102.12
TGGT1_261500;TGVEG_261500;TGME49_261500	hydrolase	N/A	0	NaN	NaN	28.4556	28.5938	NaN	27.538	21.1314	22.0307	28.4556	28.5938	20.905	27.538	+	6.84012	+						0	101	44.1	9.48643	NaN	NaN	8.21572	8.37186	NaN	8.53152	0	0	9	10	0	13	53.149
TGME49_211630;TGGT1_211630;TGVEG_211630	hypothetical protein	N/A	0	NaN	NaN	29.7415	29.6133	NaN	27.5218	23.2521	21.9667	29.7415	29.6133	21.461	27.5218	+	6.73229	+			+			0	84	75.1	9.52244	NaN	NaN	8.73288	8.68656	NaN	8.41612	0	0	14	12	0	9	23.612
TGME49_212210;TGGT1_212210;TGVEG_212210	hypothetical protein	N/A	0	NaN	NaN	27.3924	26.2353	NaN	22.1095	22.8056	20.3925	27.3924	26.2353	21.8071	22.1095	+	3.57733	+		+				1.1383e-73	15	43.2	8.345	NaN	NaN	7.75742	8.00286	NaN	7.06502	0	0	3	2	0	2	28.897
TGVEG_214575;TGME49_214575;TGGT1_214575	hypothetical protein	N/A	0	NaN	NaN	29.2312	28.8575	NaN	26.3721	23.2538	19.9594	29.2312	28.8575	22.1391	26.3721	+	6.36949	+						1.4847e-46	77	66.3	9.44579	NaN	NaN	8.50022	8.42285	NaN	8.35668	0	0	7	7	0	4	10.282
TGVEG_232280;TGGT1_232280;TGME49_232280	hypothetical protein	N/A	0	NaN	NaN	31.2261	31.3905	NaN	29.989	22.8031	20.0738	31.2261	31.3905	21.3822	29.989	+	9.44887	+				+		0	215	92.7	10.2041	NaN	NaN	9.06292	9.18381	NaN	9.39872	0	0	21	22	0	17	30.148
TGVEG_242570;TGME49_242570;TGGT1_242570	hypothetical protein	N/A	0	NaN	NaN	24.9759	24.0471	NaN	26.5353	21.5843	20.8239	24.9759	24.0471	21.5232	26.5353	+	3.87566	+						2.7268e-182	95	33.3	9.04661	NaN	NaN	7.32362	6.9208	NaN	8.26262	0	0	3	2	0	18	94.818
TGVEG_249970;TGME49_249970;TGGT1_249970	hypothetical protein	N/A	0	NaN	NaN	31.1301	31.0926	NaN	29.7017	21.8468	20.6114	31.1301	31.0926	21.8401	29.7017	+	9.20868	+		+		+	+	0	137	61.1	9.97832	NaN	NaN	9.2051	9.3818	NaN	8.74028	0	0	14	15	0	10	24.712
TGVEG_264990;TGME49_264990;TGGT1_264990	hypothetical protein	N/A	0	NaN	NaN	28.9645	28.7871	NaN	26.3252	20.0842	21.6109	28.9645	28.7871	20.8373	26.3252	+	7.1815	+		+				8.6711e-141	74	56.4	9.40024	NaN	NaN	8.21093	8.33298	NaN	8.31144	0	0	7	7	0	9	29.069
TGVEG_265270;TGGT1_265270;TGME49_265270	hypothetical protein	N/A	0	NaN	NaN	25.5358	26.3206	NaN	24.1321	22.5008	18.9839	25.5358	26.3206	21.1511	24.1321	+	4.45092	+						2.2638e-25	22	19.8	8.38922	NaN	NaN	7.61761	7.73484	NaN	7.45862	0	0	3	3	0	6	38.43
TGVEG_289615;TGGT1_289615;TGME49_289615	hypothetical protein	N/A	0	NaN	NaN	26.3909	25.9076	NaN	23.7653	21.5915	20.8869	26.3909	25.9076	21.9418	23.7653	+	3.88123	+						7.3375e-19	17	41.6	8.39562	NaN	NaN	7.65455	7.58642	NaN	7.25672	0	0	3	3	0	2	23.085
TGVEG_310420;TGME49_310420;TGGT1_310420	hypothetical protein	N/A	0	NaN	NaN	29.701	28.5879	NaN	27.2752	21.8637	20.6004	29.701	28.5879	22.3762	27.2752	+	6.90794	+		+	+			2.9983e-72	32	26.2	9.45873	NaN	NaN	8.64923	8.74984	NaN	8.4204	0	0	3	3	0	2	22.925
TGGT1_310930;TGVEG_310930;TGME49_310930	hypothetical protein	N/A	0	NaN	NaN	26.3936	26.209	NaN	24.7339	22.3144	20.5819	26.3936	26.209	21.7729	24.7339	+	4.22244	+		+				2.4794e-53	35	17.5	8.70946	NaN	NaN	7.60741	7.57136	NaN	7.69537	0	0	3	2	0	5	87.519
TGVEG_313380;TGME49_313380;TGGT1_313380	hypothetical protein	N/A	0	NaN	NaN	28.9571	28.8042	NaN	28.7765	21.6191	21.6772	28.9571	28.8042	21.9657	28.7765	+	7.09193	+			+	+	+	0	173	82.5	9.83908	NaN	NaN	8.32	8.36078	NaN	8.95986	0	0	12	13	0	16	31.512
TGME49_319510;TGGT1_319510;TGVEG_319510	hypothetical protein	N/A	0	NaN	NaN	29.0971	29.0796	NaN	26.973	21.4993	21.1813	29.0971	29.0796	22.2441	26.973	+	6.74171	+		+				1.8321e-281	90	73.6	9.34221	NaN	NaN	8.53303	8.54474	NaN	8.40567	0	0	14	13	0	12	29.923
TGVEG_320760;TGME49_320760;TGGT1_320760	hypothetical protein	N/A	0	NaN	NaN	26.5063	26.7213	NaN	26.6521	20.0374	19.1618	26.5063	26.7213	21.5904	26.6521	+	6.36338	+						3.0992e-127	86	50.7	9.16224	NaN	NaN	7.55178	7.63638	NaN	8.3366	0	0	6	6	0	14	39.389
TGVEG_293470;TGME49_293470;TGGT1_293470	hypothetical protein;immune mapped protein 1	N/A	0	NaN	NaN	29.2969	29.4643	NaN	28.4457	21.0962	20.0663	29.2969	29.4643	22.9425	28.4457	+	7.70065	+				+		0	175	79.8	9.70403	NaN	NaN	8.57492	8.6661	NaN	8.80547	0	0	21	23	0	20	43.492
TGVEG_260820;TGME49_260820;TGGT1_260820	IMC sub-compartment protein ISP1	N/A	0	NaN	NaN	31.2865	31.2308	NaN	29.8943	21.7806	20.8055	31.2865	31.2308	21.6523	29.8943	+	9.39107	+		+		+	+	0	146	86.9	10.0302	NaN	NaN	9.31572	9.3615	NaN	8.97273	0	0	15	15	0	10	19.413
TGVEG_237820;TGME49_237820;TGGT1_237820	IMC sub-compartment protein ISP2	N/A	0	NaN	NaN	30.3571	30.1304	NaN	28.166	22.326	22.6469	30.3571	30.1304	22.1362	28.166	+	7.18147	+				+	+	1.289e-128	95	71.2	9.78067	NaN	NaN	8.77357	8.76897	NaN	8.79858	0	0	10	11	0	7	17.397
TGVEG_316540;TGME49_316540;TGGT1_316540	IMC sub-compartment protein ISP3	N/A	0	NaN	NaN	32.3601	32.4671	NaN	30.5606	22.5576	20.8431	32.3601	32.4671	20.3583	30.5606	+	10.543	+		+	+	+	+	3.0573e-207	164	80.5	10.2947	6.16268	NaN	9.68397	9.66763	5.80543	9.11833	1	0	12	13	1	9	18.39
TGGT1_243800;TGVEG_243800;TGME49_243800	long-chain fatty acid CoA ligase, putative;putative long-chain fatty acid CoA ligase	N/A	0	NaN	NaN	27.6356	26.8734	NaN	30.2757	21.8264	18.5386	27.6356	26.8734	23.2893	30.2757	+	7.04346	+		+				0	448	67.7	10.2563	NaN	NaN	7.81921	7.70162	NaN	9.41572	0	0	16	11	0	39	83.507
TGGT1_292120;TGVEG_292120;TGME49_292120	membrane occupation and recognition nexus protein MORN2	N/A	0	NaN	NaN	29.9914	29.9676	NaN	27.1543	21.8804	20.9784	29.9914	29.9676	21.6171	27.1543	+	7.54585	+				+		0	129	76.1	9.56291	NaN	NaN	8.72779	8.7892	NaN	8.47436	0	0	18	19	0	17	49.281
TGVEG_261780;TGME49_261780;TGGT1_261780	microneme protein MIC7	N/A	1	NaN	NaN	27.7856	28.031	NaN	27.1556	22.8605	20.4544	27.7856	28.031	22.9772	27.1556	+	5.56005	+						1.2346e-220	106	48.5	9.40547	NaN	NaN	8.00134	8.0707	NaN	8.56727	0	0	7	8	0	12	36.34
TGGT1_207830;TGVEG_207830;TGME49_207830	MORN repeat-containing protein	N/A	0	NaN	NaN	28.6	29.0299	NaN	27.616	21.382	20.3284	28.6	29.0299	22.1228	27.616	+	7.13755	+				+		0	100	64.8	9.42566	NaN	NaN	8.39947	8.55236	NaN	8.41244	0	0	16	16	0	11	39.833
TGVEG_297150;TGME49_297150;TGGT1_297150	MORN repeat-containing protein	N/A	0	NaN	NaN	24.6842	24.6849	NaN	24.0687	21.0532	22.2842	24.6842	24.6849	20.8235	24.0687	+	3.09228	+			+	+		5.3495e-42	33	35.5	8.48896	NaN	NaN	7.15497	7.2267	NaN	7.17173	0	0	5	4	0	4	50.295
TGGT1_313290;TGVEG_313290;TGME49_313290	MORN repeat-containing protein	N/A	0	NaN	NaN	30.4798	30.5753	NaN	28.2091	21.6349	22.5357	30.4798	30.5753	21.2931	28.2091	+	7.93354	+		+				0	150	68.1	9.74368	NaN	NaN	8.90335	8.97499	NaN	8.79283	0	0	20	21	0	17	46.04
TGVEG_245710;TGME49_245710;TGGT1_245710	phosphatidylinositol-4-phosphate 5-kinase, putative;putative phosphatidylinositol-4-phosphate 5-kinase	N/A	0	NaN	NaN	27.1778	26.9184	NaN	25.9842	19.8682	18.8118	27.1778	26.9184	22.7101	25.9842	+	6.23011	+			+	+		1.8277e-58	47	38.5	9.09896	NaN	NaN	7.77419	7.80888	NaN	8.12901	0	0	7	8	0	8	31.258
TGGT1_281580;TGVEG_281580;TGME49_281580	PP2C, putative;putative PP2C	N/A	0	NaN	NaN	26.3539	26.4244	NaN	25.5199	22.1331	20.2527	26.3539	26.4244	23.1595	25.5199	+	4.251	+						2.3771e-85	40	25.1	8.65458	NaN	NaN	7.82552	7.75718	NaN	7.56261	0	0	7	5	0	6	71.856
TGVEG_213800;TGME49_213800;TGGT1_213800	protein phosphatase 2b regulatory subunit, putative;putative protein phosphatase 2b regulatory subunit	N/A	0	NaN	NaN	26.4641	26.1239	NaN	27.8484	21.4568	22.4897	26.4641	26.1239	22.0194	27.8484	+	4.82355	+					+	1.3267e-148	76	64.4	9.37987	NaN	NaN	7.5418	7.48087	NaN	8.68547	0	0	4	2	0	8	19.994
TGGT1_232340;TGVEG_232340;TGME49_232340	protein phosphatase 2C domain-containing protein	N/A	0	NaN	NaN	28.0271	27.885	NaN	30.4548	21.1837	19.8682	28.0271	27.885	21.6499	30.4548	+	7.8884	+					+	0	282	59.8	10.2397	NaN	NaN	7.9857	7.92647	NaN	9.50154	0	0	10	11	0	37	60.027
TGGT1_267100;TGVEG_267100;TGME49_267100	protein phosphatase 2C domain-containing protein	N/A	0	NaN	NaN	25.9295	25.1012	NaN	25.6349	22.4091	22.1522	25.9295	25.1012	22.0058	25.6349	+	3.36616	+					+	1.8871e-152	88	38.7	8.86557	NaN	NaN	7.4248	7.21128	NaN	7.95969	0	0	9	8	0	14	96.722
TGVEG_295110;TGME49_295110;TGGT1_295110	rhoptry protein ROP7	HMM: MGHPTSFGQPSCLVWLAAAFLVLGLCLVQQGAGI, NN: MGHPTSFGQPSCLVWLAAAFLVLGLCLVQQGAGI	1	NaN	NaN	26.561	26.6257	27.2453	26.5387	23.2217	18.2657	26.561	26.6257	27.2453	26.5387	+	3.66426	+				+		3.5515e-101	87	35.7	9.18755	NaN	NaN	7.48226	7.45134	8.27089	8.20491	0	0	6	8	9	11	63.394
TGVEG_228470;TGME49_228470;TGGT1_228470	ribosomal protein RPL15	N/A	0	NaN	NaN	23.735	24.2307	23.7551	24.7628	22.9856	18.7708	23.735	24.2307	23.7551	24.7628	+	2.40565	+				+		8.7216e-22	34	25.9	8.65014	6.11521	NaN	6.70529	6.81408	7.03703	7.59169	1	0	2	2	2	2	24.325
TGVEG_239330;TGME49_239330;TGGT1_239330	ribosomal protein RPL37	N/A	0	NaN	NaN	25.0986	25.3067	NaN	24.2485	22.0975	20.9937	25.0986	25.3067	20.8107	24.2485	+	3.58399	+						1.5855e-08	10	32.7	8.17006	NaN	NaN	7.21352	7.37842	7.05873	7.69264	0	0	2	2	2	3	11.221
TGGT1_306660;TGVEG_306660;TGME49_306660	RNA pseudouridine synthase superfamily protein	N/A	0	NaN	NaN	25.2411	24.0047	NaN	NaN	22.0142	20.2982	25.2411	24.0047	22.5853	22.4378	+	2.26199	+						3.114e-12	14	0.8	7.93524	NaN	NaN	7.1917	7.14789	NaN	6.88617	0	0	2	2	0	2	676.19
TGGT1_262390;TGVEG_262390;TGME49_262390	TLD protein	N/A	0	NaN	NaN	25.7516	25.7567	NaN	24.3902	21.5098	22.054	25.7516	25.7567	21.9603	24.3902	+	3.45815	+		+				6.5616e-58	33	11.3	8.4098	NaN	NaN	7.4797	7.84473	NaN	7.42711	0	0	7	9	0	5	148.06
TGVEG_285190;TGGT1_285190;TGME49_285190	zinc finger, C3HC4 type (RING finger) domain-containing protein	N/A	0	NaN	NaN	NaN	23.7841	NaN	25.7291	21.337	21.3011	22.7185	23.7841	22.109	25.7291	+	2.49486	+						1.4313e-71	46	17.7	8.84277	NaN	NaN	6.58835	6.89422	NaN	7.99465	0	0	1	2	0	8	70.003

## Sheet: Myr peptides Trypsin
Protein IDs	Protein name	Myristoylated peptide sequence	Intensity Trypsin_Myr1	Intensity Trypsin_Myr2	Intensity Trypsin_Myr3	Intensity Trypsin_YnMyr1	Intensity Trypsin_YnMyr2	Intensity Trypsin_YnMyr3	YnMyr on Cys	MG motif	Myr peptide TEV	Intensity	Score	Delta score	PEP	MS/MS count	Missed cleavages	Mass	Retention time
TGGT1_262490;TGVEG_262490;TGME49_262490	alpha/beta hydrolase, putative;putative alpha/beta hydrolase	GNALKR	NaN	NaN	NaN	22.2722	NaN	21.0955	0	+		6.86368	69.39	21.148	0.025871	2	1	1120.68	86.938
TGVEG_261440;TGME49_261440;TGGT1_261440	ARM repeats containing protein	GNQCCAGR	NaN	NaN	NaN	25.7804	NaN	25.8972	0	+		8.07965	86.833	70.06	0.0023545	4	0	1384.65	84.921
TGVEG_301440;TGME49_301440;TGGT1_301440	calcium-dependent protein kinase CDPK1	GQQESTLGGAAGEPR	NaN	NaN	NaN	29.5028	27.0466	29.2	0	+	+	9.18073	153.79	125.62	6.1542e-33	17	0	1919.98	105.75
TGVEG_305860;TGME49_305860;TGGT1_305860	calcium-dependent protein kinase CDPK3	GCVHSK	NaN	NaN	NaN	24.0779	NaN	23.7752	0	+		7.50602	81.1	54.971	0.014504	2	0	1149.61	71.934
TGVEG_242070;TGME49_242070;TGGT1_242070	cAMP-dependent protein kinase regulatory subunit	GNVCECQK	NaN	NaN	NaN	26.9781	25.3221	26.9714	0	+	+	8.48534	145.72	120.89	7.9665e-06	8	0	1456.69	98.178
TGGT1_240550;TGVEG_240550;TGME49_240550	copper chaperone COX17-1, putative;putative copper chaperone COX17-1	GSQASTPASTTLPAEQPGSTSSCSK	NaN	NaN	NaN	23.0008	NaN	23.2928	0	+	+	7.27112	80.102	71.536	3.0594e-19	2	0	2899.4	105.54
TGGT1_262450;TGVEG_262450;TGME49_262450	dyggve-melchior-clausen syndrome protein;hypothetical protein	GSGSSRPGEAEGGAYHGPGEAAK	NaN	NaN	NaN	23.0874	NaN	22.4536	0	+		7.16605	80.412	70.897	1.0965e-18	2	1	2591.25	67.957
TGME49_223940;TGVEG_223940;TGGT1_223940	GAP45;GAP45 protein	GNACKK	NaN	NaN	NaN	24.1306	NaN	23.4997	0	+		7.48041	53.522	24.883	0.015267	2	1	1139.62	58.974
TGME49_319510;TGGT1_319510	hypothetical protein	GAGLSSHAGAGK	NaN	NaN	NaN	25.6372	NaN	25.557	0	+	+	8.00668	198.81	150.25	1.264e-57	7	0	1474.8	85.657
TGVEG_310420;TGME49_310420;TGGT1_310420	hypothetical protein	GNCLSGGAQPAR	NaN	NaN	NaN	27.2879	24.0807	27.1532	0	+	+	8.51963	124.12	103.33	4.3863e-09	11	0	1649.84	108.05
TGVEG_219710;TGGT1_219710;TGME49_219710	hypothetical protein	GNEVASHQGASVSPSHAVR	NaN	NaN	NaN	24.5902	NaN	25.052	0	+	+	7.77847	68.168	49.346	5.497e-07	2	0	2352.2	73.694
TGVEG_249970;TGME49_249970;TGGT1_249970	hypothetical protein	GNTMSCFDR	NaN	NaN	NaN	26.3101	NaN	25.5306	0	+	+	8.11949	139.86	116.54	5.2878e-07	4	0	1549.71	127.75
TGVEG_289615;TGGT1_289615;TGME49_289615	hypothetical protein	GNVCNFCR	NaN	NaN	NaN	NaN	NaN	21.8783	0	+		6.58601	45.68	34.734	0.0096435	1	0	1488.71	120.47
TGVEG_232280;TGGT1_232280;TGME49_232280	hypothetical protein	GAVCGK	NaN	NaN	NaN	26.7838	NaN	26.4276	0	+		8.31347	130.16	56.186	0.018887	2	0	1053.58	103.08
TGVEG_265270;TGGT1_265270;TGME49_265270	hypothetical protein	GSNCCK	NaN	NaN	NaN	21.3697	NaN	21.4706	0	+		6.7494	50.025	29.543	0.013724	2	0	1187.55	81.142
TGVEG_293470;TGME49_293470;TGGT1_293470	hypothetical protein;immune mapped protein 1	GTVCTK	NaN	NaN	NaN	25.5495	24.0049	25.2239	0	+		8.02173	124.89	25.377	0.027516	3	0	1127.61	100.43
TGVEG_309990;TGME49_309990;TGGT1_309990	hypothetical protein;putative transmembrane protein	GNMCAICFNPGK	NaN	NaN	NaN	20.7936	NaN	21.1752	0	+	+	6.62176	96.229	82.146	3.7829e-07	2	0	1830.87	139.89
TGVEG_260820;TGME49_260820;TGGT1_260820	IMC sub-compartment protein ISP1	GAVSSCCAVEESEER	NaN	NaN	NaN	26.7348	23.2794	26.3423	0	+	+	8.31584	160.63	145.97	2.8221e-41	8	0	2131.96	114.4
TGVEG_316540;TGME49_316540;TGGT1_316540	IMC sub-compartment protein ISP3	GNTACCGFDSDSTADLEIGR	NaN	NaN	NaN	25.6361	NaN	25.4107	0	+	+	7.98567	125.04	105.13	2.5787e-39	8	0	2608.16	136.56
TGGT1_243800;TGVEG_243800;TGME49_243800	long-chain fatty acid CoA ligase, putative;putative long-chain fatty acid CoA ligase	GNTQSGPQIVYNVPIEDPVPAGK	NaN	NaN	NaN	26.46	23.2115	26.4318	0	+	+	8.28454	88.239	81.346	2.2893e-19	7	0	2842.5	141.72
TGGT1_313290;TGVEG_313290;TGME49_313290	MORN repeat-containing protein	GCTQSTANETTK	NaN	NaN	NaN	23.0634	22.4611	22.6808	0	+	+	7.32764	106.58	86.587	2.9394e-14	3	0	1759.85	88.556
TGVEG_245710;TGME49_245710;TGGT1_245710	phosphatidylinositol-4-phosphate 5-kinase, putative;putative phosphatidylinositol-4-phosphate 5-kinase	GNCACPR	NaN	NaN	NaN	23.1317	NaN	22.9814	0	+		7.24232	86.866	51.438	0.0056021	2	0	1296.62	90.246
TGGT1_232340;TGVEG_232340;TGME49_232340	protein phosphatase 2C domain-containing protein	GAYLAKPK	NaN	NaN	NaN	NaN	22.1555	25.0988	0	+		7.60859	67.981	53.199	0.023075	3	1	1309.79	108.14
TGGT1_262390;TGVEG_262390;TGME49_262390	TLD protein	GAEQSGMSAPGEGHR	NaN	NaN	NaN	23.3865	NaN	23.1075	0	+	+	7.3011	102.64	91.054	1.7975e-15	2	0	1932.92	85.978

## Sheet: Myr peptides TEV
Protein IDs	Protein name	Myristoylated peptide sequence	Intensity TEV_Myr1	Intensity TEV_Myr2	Intensity TEV_YnMyr1	Intensity TEV_YnMyr2	Intensity TEVII_Myr1	Intensity TEVII_YnMyr1	YnMyr on Cys	MG motif	Myr peptide TEVI	Myr peptide TEVII	Myr peptide Trypsin	Intensity	Score	Delta score	PEP	MS/MS count	Missed cleavages	Mass	Retention time
TGVEG_301440;TGME49_301440;TGGT1_301440	calcium-dependent protein kinase CDPK1	GQQESTLGGAAGEPR	NaN	NaN	28.5242	28.2055	NaN	30.8921	0	+	+	+	+	9.42948	145.69	98.089	1.0974e-32	20	0	1948.01	89.467
TGVEG_242070;TGME49_242070;TGGT1_242070	cAMP-dependent protein kinase regulatory subunit	GNVCECQK	NaN	NaN	NaN	26.2486	NaN	27.5915	0	+	+	+	+	8.4502	105.25	85.045	0.0013011	5	0	1484.72	81.227
TGGT1_240550;TGVEG_240550;TGME49_240550	copper chaperone COX17-1, putative;putative copper chaperone COX17-1	GSQASTPASTTLPAEQPGSTSSCSK	NaN	NaN	NaN	NaN	NaN	24.4015	0	+		+	+	7.34557	55.789	53.981	3.4794e-08	1	0	2927.43	75.773
TGGT1_232815;TGVEG_232815;TGME49_232815	Erv1 / Alr family protein	GNSAGAYSFR	NaN	NaN	23.5028	23.5195	NaN	21.7421	0	+	+	+		7.43804	79.201	63.048	0.00042014	3	0	1519.79	102.25
TGME49_319510;TGGT1_319510	hypothetical protein	GAGLSSHAGAGK	NaN	NaN	25.321	25.2515	NaN	24.84	0	+	+	+	+	8.04879	80.245	57.559	0.00038223	7	0	1502.83	74.683
TGVEG_249970;TGME49_249970;TGGT1_249970	hypothetical protein	GNTMSCFDR	NaN	NaN	26.41	26.152	NaN	25.6135	0	+	+	+	+	8.33258	57.888	40.657	0.005178	4	0	1577.74	112
TGVEG_310420;TGME49_310420;TGGT1_310420	hypothetical protein	GNCLSGGAQPAR	NaN	NaN	29.274	29.523	NaN	27.5496	0	+	+	+	+	9.20871	83.182	74.772	9.8013e-05	19	0	1677.87	95.144
TGME49_277870;TGGT1_277870	hypothetical protein	GQTQSIDLSDDGVDDVQIR	NaN	NaN	NaN	NaN	NaN	21.6245	0	+		+		6.50962	40.432	35.041	0.0024761	1	0	2551.29	99.109
TGVEG_219710;TGGT1_219710;TGME49_219710	hypothetical protein	GNEVASHQGASVSPSHAVR	NaN	NaN	NaN	NaN	NaN	25.0204	0	+		+	+	7.53189	57.173	49.662	5.4943e-05	2	0	2380.24	58.415
TGGT1_212210;TGVEG_212210	hypothetical protein	GNEQSSEAEGQRPEQVPNTETGLSEPAK	NaN	NaN	NaN	NaN	NaN	26.0548	0	+		+		7.84326	75.018	68.371	3.6067e-17	4	1	3459.69	66.735
TGGT1_310930;TGVEG_310930;TGME49_310930	hypothetical protein	GNTESTAAELHDNYLAVLK	NaN	NaN	24.2699	NaN	NaN	NaN	0	+	+			7.30597	54.103	44.304	0.00042928	1	0	2536.33	126.43
TGVEG_264990;TGME49_264990;TGGT1_264990	hypothetical protein	GNVIEQFHAER	NaN	NaN	25.815	26.3	NaN	NaN	0	+	+			8.15122	85.813	70.913	0.0007431	3	0	1789.96	121.76
TGVEG_309990;TGME49_309990;TGGT1_309990	hypothetical protein;putative transmembrane protein	GNMCAICFNPGK	NaN	NaN	NaN	NaN	NaN	22.1293	0	+		+	+	6.6616	68.536	66.114	0.00012293	1	0	1858.9	98.246
TGVEG_255245;TGME49_255245;TGGT1_255245	hypothetical protein;putative transmembrane protein	GNLLSSLLPPR	NaN	NaN	NaN	NaN	NaN	23.9269	0	+		+		7.20271	112.13	112.13	3.3544e-06	3	0	1657	125.64
TGVEG_260820;TGME49_260820;TGGT1_260820	IMC sub-compartment protein ISP1	GAVSSCCAVEESEER	NaN	NaN	25.9491	26.2289	NaN	27.8392	0	+	+	+	+	8.58384	114.64	106.93	4.4314e-15	15	0	2159.99	97.374
TGVEG_316540;TGME49_316540;TGGT1_316540	IMC sub-compartment protein ISP3	GNTACCGFDSDSTADLEIGR	NaN	NaN	NaN	23.7506	NaN	27.5466	0	+	+	+	+	8.32255	183.21	166.9	2.7458e-72	5	0	2636.2	104.63
TGGT1_243800;TGVEG_243800;TGME49_243800	long-chain fatty acid CoA ligase, putative;putative long-chain fatty acid CoA ligase	GNTQSGPQIVYNVPIEDPVPAGK	NaN	NaN	24.8425	NaN	NaN	29.047	0	+	+	+	+	8.76696	142.93	135.83	1.3515e-62	3	0	2870.53	111.79
TGGT1_313290;TGVEG_313290;TGME49_313290	MORN repeat-containing protein	GCTQSTANETTK	NaN	NaN	NaN	NaN	NaN	23.9999	0	+		+	+	7.22469	69.229	51.267	0.00032378	1	0	1787.88	64.728
TGGT1_262390;TGVEG_262390;TGME49_262390	TLD protein	GAEQSGMSAPGEGHR	NaN	NaN	24.1044	NaN	NaN	NaN	0	+	+		+	7.25614	42.242	34.594	0.0051485	1	0	1960.95	80.493
TGVEG_240630;TGME49_240630;TGGT1_240630	ULK kinase	GNQQAGCSGVR	NaN	NaN	NaN	NaN	NaN	21.3666	0	+		+		6.43199	52.247	41.083	0.0015103	1	0	1623.83	63.531

## Sheet: Human MG proteins
Gene names	Majority protein IDs	Protein names	MG motif	Log10 t-test p value Trypsin * (-1)	Log2 FC YnMyr/Myr Trypsin	t-test Significant Trypsin	Log2 FC YnMyr/Myr TEV	TEV selection Log2 FC>2	Myr peptide	Combined from Thinon et al. 2014 and Broncel et al. 2015	Castrec et al. 2018	LFQ intensity Trypsin_Myr1	LFQ intensity Trypsin_Myr2	LFQ intensity Trypsin_Myr3	LFQ intensity Trypsin_YnMyr1	LFQ intensity Trypsin_YnMyr2	LFQ intensity Trypsin_YnMyr3	LFQ intensity TEV_Myr1	LFQ intensity TEV_Myr2	LFQ intensity TEV_YnMyr1	LFQ intensity TEV_YnMyr2	LFQ intensity TEVII_Myr1	LFQ intensity TEVII_YnMyr1	Imputed LFQ intensity Trypsin_Myr1	Imputed LFQ intensity Trypsin_Myr2	Imputed LFQ intensity Trypsin_Myr3	Imputed LFQ intensity Trypsin_YnMyr1	Imputed LFQ intensity Trypsin_YnMyr2	Imputed LFQ intensity Trypsin_YnMyr3	Imputed LFQ intensity TEV_Myr1	Imputed LFQ intensity TEV_Myr2	Imputed LFQ intensity TEV_YnMyr1	Imputed LFQ intensity TEV_YnMyr2	Imputed LFQ intensity TEVII_Myr1	Imputed LFQ intensity TEVII_YnMyr1	PEP	MS/MS Count	Sequence coverage [%]	Total Intensity	Intensity Trypsin_Myr1	Intensity Trypsin_Myr2	Intensity Trypsin_Myr3	Intensity Trypsin_YnMyr1	Intensity Trypsin_YnMyr2	Intensity Trypsin_YnMyr3	Intensity TEV_Myr1	Intensity TEV_Myr2	Intensity TEV_YnMyr1	Intensity TEV_YnMyr2
AIFM2	Q9BRQ8	Apoptosis-inducing factor 2	+	5.26586	6.16028	+	NaN			+	+	NaN	NaN	NaN	26.4685	26.7008	26.4433	NaN	NaN	NaN	NaN	NaN	26.2693	20.5288	20.6426	19.9604	26.4685	26.7008	26.4433	NaN	NaN	NaN	NaN	NaN	NaN	2.7333e-175	58	56.3	1004600000	0	0	0	337260000	284040000	270240000	0	0	0	221280
AKAP12	Q02952	A-kinase anchor protein 12	+	4.98916	7.75503	+	8.70258	+	+	+	+	NaN	NaN	NaN	28.2181	28.1382	28.1119	NaN	NaN	30.8146	30.8962	NaN	28.4356	20.7623	20.7048	19.736	28.2181	28.1382	28.1119	20.808	21.08	30.8146	30.8962	22.1506	28.4356	0	205	33.3	6644000000	0	0	0	1472100000	1173400000	1218100000	0	0	834960000	1067500000
ANKIB1	Q9P2G1	Ankyrin repeat and IBR domain-containing protein 1	+	2.1028	2.54084	+	NaN			+	+	NaN	NaN	NaN	22.931	22.9014	22.9698	NaN	NaN	NaN	NaN	NaN	NaN	21.6037	19.4801	20.0959	22.931	22.9014	22.9698	NaN	NaN	NaN	NaN	NaN	NaN	5.9891e-11	8	3.6	69698000	0	0	0	17460000	23100000	23511000	0	0	0	0
AP1AR	Q63HQ0	AP-1 complex-associated regulatory protein	+	0.741039	1.36472		1.80849			+	+	NaN	NaN	NaN	23.8821	NaN	22.4625	NaN	NaN	22.89	22.9122	NaN	22.761	20.5853	19.6748	21.8914	23.8821	19.901	22.4625	21.3758	20.1691	22.89	22.9122	21.593	22.761	8.5735e-20	8	12.6	89489000	0	0	0	20833000	12873000	18708000	0	0	3591000	4471500
ARF1;ARF3	P84077;P61204	ADP-ribosylation factor 1;ADP-ribosylation factor 3	+	6.8159	12.0713	+	8.38855	+	+	+	+	NaN	NaN	NaN	32.0495	31.8131	31.9794	NaN	NaN	29.1473	28.3123	NaN	31.7099	20.2062	19.7579	19.6639	32.0495	31.8131	31.9794	22.3874	19.9622	29.1473	28.3123	21.6542	31.7099	0	469	76.8	48477000000	689900	668760	0	13565000000	14147000000	13596000000	5267800	1497700	323310000	275060000
ARF4	P18085	ADP-ribosylation factor 4	+	5.97319	10.1595	+	6.48165	+	+	+	+	NaN	NaN	NaN	30.8975	30.8283	30.9858	NaN	NaN	27.2341	26.9318	NaN	30.5972	20.8707	20.2731	21.0893	30.8975	30.8283	30.9858	21.2169	21.5707	27.2341	26.9318	22.5305	30.5972	0	271	91.1	22700000000	0	832100	470840	6616800000	6153100000	6563900000	0	0	55549000	52738000
ARF5	P84085	ADP-ribosylation factor 5	+	5.10821	7.21071	+	NaN		+	+	+	NaN	NaN	NaN	27.4525	27.4615	27.6012	NaN	NaN	NaN	NaN	NaN	27.1769	20.8502	19.8977	20.1352	27.4525	27.4615	27.6012	NaN	NaN	NaN	NaN	NaN	NaN	0	35	68.9	1908400000	0	0	0	536840000	477390000	571530000	0	0	14006000	12962000
ARF6	P62330	ADP-ribosylation factor 6	+	5.36056	6.58613	+	NaN			+	+	NaN	NaN	NaN	27.5823	27.3839	27.4706	NaN	NaN	NaN	NaN	NaN	27.1717	20.5398	21.302	20.8367	27.5823	27.3839	27.4706	NaN	NaN	NaN	NaN	NaN	NaN	7.464e-103	49	49.1	1982700000	0	0	0	636590000	493030000	515230000	0	0	33210000	18563000
ARL1	P40616	ADP-ribosylation factor-like protein 1	+	4.31827	8.61969	+	3.54622	+		+	+	NaN	NaN	NaN	28.9986	27.961	29.1824	NaN	NaN	23.2214	23.3592	NaN	28.4791	20.2128	20.7132	19.3569	28.9986	27.961	29.1824	21.8155	20.5476	23.2214	23.3592	22.0579	28.4791	0	113	74	4725200000	0	0	0	1555700000	858540000	1650300000	0	0	6427500	9508500
ARL5B	Q96KC2	ADP-ribosylation factor-like protein 5B	+	0.30327	0.0071551		NaN			+	+	NaN	NaN	NaN	21.4972	NaN	21.5555	NaN	NaN	NaN	NaN	NaN	NaN	20.6295	19.7714	21.3386	21.4972	18.7083	21.5555	NaN	NaN	NaN	NaN	NaN	NaN	3.3374e-15	6	29.6	24715000	0	0	0	8934600	5290000	8001800	0	0	0	0
BASP1	P80723	Brain acid soluble protein 1	+	2.82042	5.19564	+	4.60908	+		+	+	NaN	NaN	NaN	25.7424	25.277	25.6261	NaN	NaN	27.1483	26.986	NaN	24.7542	21.9461	19.6004	19.5121	25.7424	25.277	25.6261	22.3066	20.2767	27.1483	26.986	22.478	24.7542	1.4582e-159	39	81.1	1001600000	0	0	0	309540000	198800000	366540000	0	0	40955000	35846000
C9orf123	Q96GE9	Transmembrane protein C9orf123	+	NaN	NaN		NaN			+	+	NaN	NaN	NaN	NaN	NaN	NaN	NaN	NaN	NaN	NaN	NaN	23.1579	NaN	NaN	NaN	NaN	NaN	NaN	NaN	NaN	NaN	NaN	NaN	NaN	9.4552e-27	3	32.8	124190000	0	0	0	48681000	0	46554000	0	0	7987900	3622700
CCNY	Q8ND76	Cyclin-Y	+	0.504167	0.660535		NaN			+	+	NaN	NaN	NaN	22.505	22.4083	NaN	NaN	NaN	NaN	NaN	NaN	NaN	20.8425	21.0318	19.9002	22.505	22.4083	18.8429	NaN	NaN	NaN	NaN	NaN	NaN	8.4786e-10	7	12	45204000	0	0	0	17435000	13783000	8323000	0	0	0	0
CCNYL1	Q8N7R7	Cyclin-Y-like protein 1	+	NaN	NaN		NaN			+	+	NaN	NaN	NaN	NaN	NaN	19.3358	NaN	NaN	NaN	NaN	NaN	NaN	NaN	NaN	NaN	NaN	NaN	NaN	NaN	NaN	NaN	NaN	NaN	NaN	0.00016699	2	7	7619100	0	0	0	2995400	2849200	1774500	0	0	0	0
CDCA3	Q99618	Cell division cycle-associated protein 3	+	1.54272	1.32762		NaN			+	+	NaN	NaN	NaN	22.2042	22.1847	22.4531	NaN	NaN	NaN	NaN	NaN	NaN	21.67	21.1848	20.0044	22.2042	22.1847	22.4531	NaN	NaN	NaN	NaN	NaN	NaN	6.2721e-18	11	22.8	48045000	0	0	0	15596000	13003000	12783000	0	0	2978200	2291600
CHCHD3	Q9NX63	Coiled-coil-helix-coiled-coil-helix domain-containing protein 3, mitochondrial	+	5.37593	8.85717	+	9.11878	+		+	+	NaN	NaN	NaN	29.108	29.2131	29.1388	NaN	NaN	31.6059	31.4035	NaN	29.0578	20.6727	20.5209	19.6949	29.108	29.2131	29.1388	21.9891	20.5593	31.6059	31.4035	22.1625	29.0578	1.2407e-228	170	69.2	10105000000	0	0	0	1923600000	1751100000	1858300000	0	0	1825100000	1534200000
CHCHD6	Q9BRQ6	Coiled-coil-helix-coiled-coil-helix domain-containing protein 6, mitochondrial	+	4.08536	2.73329	+	4.1735	+		+	+	NaN	NaN	NaN	23.9479	23.7375	23.7036	NaN	NaN	26.4065	26.2436	NaN	22.4481	21.2517	21.2428	20.6945	23.9479	23.7375	23.7036	20.6185	20.0861	26.4065	26.2436	21.8731	22.4481	7.1142e-34	18	42.1	245310000	0	0	0	52390000	41708000	50497000	0	0	46731000	41429000
CHMP6	Q96FZ7	Charged multivesicular body protein 6	+	3.9136	5.11409	+	NaN			+	+	NaN	NaN	NaN	26.0879	26.3032	26.1426	NaN	NaN	NaN	NaN	NaN	25.9997	20.8226	21.859	20.5098	26.0879	26.3032	26.1426	NaN	NaN	NaN	NaN	NaN	NaN	3.4492e-40	32	32.8	784910000	0	0	0	209810000	221500000	212390000	0	0	16048000	14272000
CLN3	Q13286	Battenin	+	1.52834	1.40912		NaN			+	+	NaN	NaN	NaN	22.2276	NaN	21.6851	NaN	NaN	NaN	NaN	NaN	NaN	19.6669	20.1931	20.3686	22.2276	20.5432	21.6851	NaN	NaN	NaN	NaN	NaN	NaN	7.1554e-08	5	7.3	40473000	0	0	0	14592000	9855900	8818200	0	0	0	0
CYB5R3	P00387	NADH-cytochrome b5 reductase 3;NADH-cytochrome b5 reductase 3 membrane-bound form;NADH-cytochrome b5 reductase 3 soluble form	+	4.68983	7.68812	+	4.00224	+		+	+	23.8793	22.6621	22.8695	30.8708	30.5995	31.005	NaN	NaN	23.4676	23.1697	22.7735	30.6413	23.8793	22.6621	22.8695	30.8708	30.5995	31.005	21.6477	20.8508	23.4676	23.1697	22.7735	30.6413	0	273	80.7	19543000000	11881000	9411900	7984600	5796500000	4549000000	5764800000	0	0	21275000	15950000
DCAF11	Q8TEB1	DDB1- and CUL4-associated factor 11	+	NaN	NaN		NaN			+	+	NaN	NaN	NaN	NaN	21.3573	NaN	NaN	NaN	NaN	NaN	NaN	NaN	NaN	NaN	NaN	NaN	NaN	NaN	NaN	NaN	NaN	NaN	NaN	NaN	0.00013784	4	3.7	8710500	0	0	0	0	6671000	2039500	0	0	0	0
DCUN1D3	Q8IWE4	DCN1-like protein 3	+	3.08429	4.92183	+	2.02829	+		+	+	NaN	NaN	NaN	24.9892	25.5111	24.8737	NaN	NaN	NaN	22.9997	NaN	25.3112	21.4459	19.5835	19.5791	24.9892	25.5111	24.8737	21.3075	21.2388	21.6415	22.9997	21.3212	25.3112	5.7782e-91	31	35.5	405340000	0	0	0	140900000	101660000	101210000	0	0	0	1556300
DEGS1	O15121	Sphingolipid delta(4)-desaturase DES1	+	4.02888	7.11694	+	3.67893	+		+	+	NaN	NaN	NaN	27.993	26.6964	27.9843	NaN	NaN	24.8637	24.1651	NaN	27.2771	20.2859	19.98	21.057	27.993	26.6964	27.9843	21.6814	20.8865	24.8637	24.1651	22.7013	27.2771	2.1384e-137	77	23.5	2200500000	0	0	0	811750000	335380000	756810000	0	0	26554000	19112000
DIRC2	Q96SL1	Disrupted in renal carcinoma protein 2	+	0.454856	0.625673		NaN			+	+	NaN	NaN	NaN	23.0607	NaN	23.3251	NaN	NaN	NaN	NaN	NaN	NaN	20.3724	21.5232	21.3832	23.0607	18.77	23.3251	NaN	NaN	NaN	NaN	NaN	NaN	2.2385e-27	8	6.9	95332000	0	0	0	25232000	21057000	28484000	0	0	0	0
DYM	Q7RTS9	Dymeclin	+	4.06812	4.41648	+	NaN			+	+	NaN	NaN	NaN	24.9631	24.913	24.8881	NaN	NaN	NaN	NaN	NaN	24.834	20.8568	20.8019	19.856	24.9631	24.913	24.8881	NaN	NaN	NaN	NaN	NaN	NaN	5.9988e-29	32	14.8	317600000	0	0	0	99166000	82344000	90637000	0	0	329110	0
FAM129A	Q9BZQ8	Protein Niban	+	4.33804	7.79471	+	4.74872	+	+	+	+	NaN	NaN	NaN	27.9432	27.7549	27.8358	NaN	NaN	26.0073	25.4681	NaN	27.4006	20.6721	19.0883	20.3894	27.9432	27.7549	27.8358	21.4352	21.5159	26.0073	25.4681	21.6788	27.4006	0	121	34.5	2582800000	0	0	0	902670000	610900000	781450000	0	0	24482000	22249000
FAM129B	Q96TA1	Niban-like protein 1	+	5.36582	7.52264	+	4.53724	+	+	+	+	22.2557	21.7048	22.4007	29.8001	29.3388	29.7901	NaN	NaN	23.9656	24.3773	19.84	29.9234	22.2557	21.7048	22.4007	29.8001	29.3388	29.7901	24.0593	20.7552	23.9656	24.3773	19.84	29.9234	0	207	56.2	9155900000	6235900	4562600	5347800	2836200000	1905600000	2394500000	0	0	29548000	32186000
FAM49B	Q9NUQ9	Protein FAM49B	+	3.94612	6.16445	+	4.10095	+		+	+	NaN	NaN	NaN	27.2934	27.3519	27.4215	NaN	NaN	24.8637	25.8187	NaN	27.2564	20.4851	20.9638	22.1246	27.2934	27.3519	27.4215	22.154	21.2122	24.8637	25.8187	22.2697	27.2564	3.8849e-178	98	64.2	1836600000	0	0	0	536610000	456210000	516210000	0	0	13518000	21338000
FBXO17	Q96EF6	F-box only protein 17	+	1.47634	1.17697		NaN			+	+	NaN	NaN	NaN	22.1552	22.4014	22.4143	NaN	NaN	NaN	NaN	NaN	21.8013	20.7833	22.0664	20.5903	22.1552	22.4014	22.4143	NaN	NaN	NaN	NaN	NaN	NaN	3.5494e-29	13	22.7	49591000	0	0	0	14198000	14532000	15084000	0	0	0	0
FLOT2	Q14254	Flotillin-2	+	4.31887	4.94756	+	NaN			+	+	NaN	NaN	NaN	25.5248	25.5259	25.4574	NaN	NaN	NaN	NaN	NaN	25.0614	21.1808	20.2928	20.1918	25.5248	25.5259	25.4574	NaN	NaN	NaN	NaN	NaN	NaN	1.2183e-97	63	54.4	463980000	0	0	0	157620000	119350000	139470000	0	0	0	0
FMNL1	O95466	Formin-like protein 1	+	NaN	NaN		NaN			+	+	NaN	NaN	NaN	19.0484	NaN	NaN	NaN	NaN	NaN	NaN	NaN	NaN	NaN	NaN	NaN	NaN	NaN	NaN	NaN	NaN	NaN	NaN	NaN	NaN	1.9497e-07	1	2.5	1583900	0	0	0	1583900	0	0	0	0	0	0
FMNL2	Q96PY5	Formin-like protein 2	+	2.86615	3.34425	+	NaN			+	+	NaN	NaN	NaN	23.6291	23.7482	23.6388	NaN	NaN	NaN	NaN	NaN	23.3561	21.1583	20.4097	19.4153	23.6291	23.7482	23.6388	NaN	NaN	NaN	NaN	NaN	NaN	3.0933e-46	17	14.3	133260000	0	0	0	45240000	38140000	41367000	0	0	0	0
FYN	P06241	Tyrosine-protein kinase Fyn	+	3.03125	2.24945	+	NaN			+	+	NaN	NaN	NaN	23.8099	23.1987	23.7008	NaN	NaN	NaN	NaN	NaN	23.4694	21.7946	21.1779	20.9885	23.8099	23.1987	23.7008	NaN	NaN	NaN	NaN	NaN	NaN	1.2787e-42	20	27.7	135560000	0	0	0	49167000	36023000	40950000	0	0	0	385510
GLIPR2	Q9H4G4	Golgi-associated plant pathogenesis-related protein 1	+	2.77144	4.20251	+	3.50743	+		+	+	NaN	NaN	NaN	24.4743	25.2155	25.0539	NaN	NaN	25.4535	25.2855	NaN	24.2186	21.9775	19.9649	20.1937	24.4743	25.2155	25.0539	22.2761	20.6243	25.4535	25.2855	21.5349	24.2186	1.4552e-69	24	53.9	398830000	0	0	0	116610000	99092000	104990000	0	0	19704000	21575000
GNAI1	P63096	Guanine nucleotide-binding protein G(i) subunit alpha-1	+	5.12549	6.26451	+	NaN		+	+	+	NaN	NaN	NaN	26.9612	26.8508	26.6943	NaN	NaN	NaN	NaN	NaN	26.6622	20.1451	20.602	20.9656	26.9612	26.8508	26.6943	NaN	NaN	NaN	NaN	NaN	NaN	0	48	56.2	1203800000	0	0	0	426780000	259800000	301060000	0	0	1594200	0
GNAI2	P04899	Guanine nucleotide-binding protein G(i) subunit alpha-2	+	5.46937	8.91517	+	5.06122	+	+	+	+	NaN	NaN	NaN	29.2409	29.2513	29.2152	NaN	NaN	25.5029	25.2002	NaN	28.8558	20.8877	20.151	19.9232	29.2409	29.2513	29.2152	20.9444	20.1065	25.5029	25.2002	23.3243	28.8558	0	189	69.3	6819900000	1788800	1074700	0	2088600000	1705600000	2026500000	0	0	24569000	27470000
GNAI3	P08754	Guanine nucleotide-binding protein G(k) subunit alpha	+	6.69148	6.3287	+	NaN		+	+	+	NaN	NaN	NaN	27.3387	27.2628	27.0618	NaN	NaN	NaN	NaN	NaN	27.0542	20.7725	20.9432	20.9613	27.3387	27.2628	27.0618	NaN	NaN	NaN	NaN	NaN	NaN	0	69	65.3	1659100000	0	0	0	549100000	450950000	438640000	0	0	600510	0
GNAO1	P09471	Guanine nucleotide-binding protein G(o) subunit alpha	+	4.44931	3.36229	+	NaN			+	+	NaN	NaN	NaN	24.0347	23.8843	23.8937	NaN	NaN	NaN	NaN	NaN	23.8092	20.4372	20.9553	20.3334	24.0347	23.8843	23.8937	NaN	NaN	NaN	NaN	NaN	NaN	3.688e-59	22	30.5	162330000	0	0	0	56947000	43476000	44687000	0	0	0	0
GORASP1	Q9BQQ3	Golgi reassembly-stacking protein 1	+	2.14074	2.35527	+	NaN			+	+	NaN	NaN	NaN	23.0663	23.1567	23.4311	NaN	NaN	NaN	NaN	NaN	NaN	21.5084	19.7489	21.331	23.0663	23.1567	23.4311	NaN	NaN	NaN	NaN	NaN	NaN	5.5249e-11	9	9.8	81955000	0	0	0	28524000	21904000	29121000	0	0	0	0
GORASP2	Q9H8Y8	Golgi reassembly-stacking protein 2	+	4.89028	8.16781	+	6.63026	+	+	+	+	NaN	NaN	NaN	28.9533	29.4368	29.0646	NaN	NaN	28.303	28.1268	NaN	27.8964	21.6296	20.4595	20.8622	28.9533	29.4368	29.0646	21.4336	20.3046	28.303	28.1268	22.6973	27.8964	1.5763e-298	98	42.7	6830600000	0	0	0	2154100000	2065800000	2188700000	0	0	45891000	61171000
HCCS	P53701	Cytochrome c-type heme lyase	+	5.63652	6.94499	+	NaN			+	+	NaN	NaN	NaN	27.4155	27.5249	27.5375	NaN	NaN	NaN	NaN	NaN	27.152	20.1511	20.8158	20.676	27.4155	27.5249	27.5375	NaN	NaN	NaN	NaN	NaN	NaN	4.9062e-155	59	53.7	1826800000	0	0	0	579120000	504390000	449210000	0	0	6483400	6713300
HPCAL1;HPCA	P37235;P84074	Hippocalcin-like protein 1;Neuron-specific calcium-binding protein hippocalcin	+	4.93216	7.73311	+	7.30862	+		+	+	NaN	NaN	NaN	28.2183	27.8145	28.1039	NaN	NaN	28.9852	29.2211	NaN	27.8801	20.1921	20.9225	19.8228	28.2183	27.8145	28.1039	21.8407	21.0827	28.9852	29.2211	21.237	27.8801	2.9537e-142	90	78.8	3862900000	0	0	0	967960000	851850000	905060000	0	0	230210000	358040000
LAMTOR1	Q6IAA8	Ragulator complex protein LAMTOR1	+	5.49388	6.42485	+	4.50352	+	+	+	+	NaN	NaN	NaN	26.5019	26.707	26.3916	NaN	NaN	26.2478	26.2213	NaN	26.1458	19.8224	20.4553	20.0482	26.5019	26.707	26.3916	22.6733	20.4908	26.2478	26.2213	21.9403	26.1458	1.9816e-201	62	75.8	1224200000	0	0	0	349160000	357690000	295240000	0	0	34585000	42030000
LANCL2	Q9NS86	LanC-like protein 2	+	0.363164	0.168858		NaN			+	+	NaN	NaN	NaN	NaN	21.196	21.4416	NaN	NaN	NaN	NaN	NaN	NaN	21.2383	19.0983	21.325	19.5305	21.196	21.4416	NaN	NaN	NaN	NaN	NaN	NaN	2.399e-06	4	8.9	17386000	0	0	0	1728700	6618000	6933300	0	0	0	0
LNP	Q9C0E8	Protein lunapark	+	6.3407	5.9277	+	NaN			+	+	NaN	NaN	NaN	26.2243	26.1988	26.1075	NaN	NaN	NaN	NaN	NaN	25.8538	20.1042	20.4687	20.1746	26.2243	26.1988	26.1075	NaN	NaN	NaN	NaN	NaN	NaN	7.3338e-93	52	31.3	767710000	0	0	0	249840000	198330000	222820000	0	0	1347800	781490
LOH12CR1	Q969J3	Loss of heterozygosity 12 chromosomal region 1 protein	+	4.45714	4.77106	+	2.03923	+		+	+	NaN	NaN	NaN	24.6901	24.7978	24.6368	NaN	NaN	NaN	22.137	NaN	24.3079	19.8691	20.446	19.4964	24.6901	24.7978	24.6368	20.8117	21.35	22.7523	22.137	20.9178	24.3079	1.4141e-71	33	46.9	267780000	0	0	0	76074000	74148000	74701000	0	0	2872500	2115900
LRRC57	Q8N9N7	Leucine-rich repeat-containing protein 57	+	4.9421	5.19291	+	NaN			+	+	NaN	NaN	NaN	25.4465	25.5348	25.6039	NaN	NaN	NaN	NaN	NaN	25.4452	19.9732	20.2837	20.7496	25.4465	25.5348	25.6039	NaN	NaN	NaN	NaN	NaN	NaN	5.8119e-37	37	38.9	515760000	0	0	0	181600000	145990000	141180000	0	0	0	0
LYN	P07948	Tyrosine-protein kinase Lyn	+	5.41407	4.82362	+	NaN			+	+	NaN	NaN	NaN	25.481	25.4452	25.5067	NaN	NaN	NaN	NaN	NaN	25.2995	20.3551	20.9105	20.6964	25.481	25.4452	25.5067	NaN	NaN	NaN	NaN	NaN	NaN	5.4255e-98	49	44.1	458080000	0	0	0	132020000	120500000	129570000	0	0	1745900	1129100
MARC2	Q969Z3	MOSC domain-containing protein 2, mitochondrial	+	2.75577	3.28258	+	NaN			+	+	NaN	NaN	NaN	24.4795	24.5626	24.4613	NaN	NaN	NaN	NaN	NaN	24.1543	20.8961	20.5028	22.2567	24.4795	24.5626	24.4613	NaN	NaN	NaN	NaN	NaN	NaN	8.9364e-24	22	37.3	250970000	0	0	0	91499000	60137000	85726000	0	0	0	805890
MARCKS	P29966	Myristoylated alanine-rich C-kinase substrate	+	4.44566	11.4991	+	10.5861	+	+	+	+	NaN	NaN	NaN	31.9009	32.0556	32.0084	NaN	NaN	32.3355	31.6047	NaN	31.6731	20.3582	21.7243	19.3851	31.9009	32.0556	32.0084	21.0445	20.794	32.3355	31.6047	22.0165	31.6731	0	172	49.1	41514000000	0	1609700	941490	9456600000	8892000000	9488200000	0	0	3315600000	3196900000
MARCKSL1	P49006	MARCKS-related protein	+	4.09882	7.89585	+	8.06449	+	+	+	+	NaN	NaN	NaN	28.3918	28.6837	28.5124	NaN	NaN	29.4806	29.3145	NaN	28.7616	21.5955	19.6378	20.667	28.3918	28.6837	28.5124	21.3612	19.3017	29.4806	29.3145	22.7004	28.7616	1.2609e-190	52	47.2	4019300000	0	0	0	763900000	769870000	766540000	0	0	554650000	540860000
MGRN1	O60291	E3 ubiquitin-protein ligase MGRN1	+	3.58275	5.16052	+	NaN			+	+	NaN	NaN	NaN	25.4128	25.5684	25.5228	NaN	NaN	NaN	NaN	NaN	25.1289	21.3042	20.1183	19.6	25.4128	25.5684	25.5228	NaN	NaN	NaN	NaN	NaN	NaN	1.868e-72	33	28.8	472390000	0	0	0	159800000	137490000	138710000	0	0	0	0
NCS1	P62166	Neuronal calcium sensor 1	+	4.20794	5.28645	+	4.59544	+		+	+	NaN	NaN	NaN	25.8263	25.7518	26.0127	NaN	NaN	25.4171	26.0099	NaN	25.8716	20.8732	19.8786	20.9797	25.8263	25.7518	26.0127	21.0717	20.9335	25.4171	26.0099	21.5072	25.8716	5.972e-47	58	52.6	780380000	0	0	0	214290000	170870000	220470000	0	0	14593000	25546000
NDUFAF4	Q9P032	NADH dehydrogenase [ubiquinone] 1 alpha subcomplex assembly factor 4	+	7.00641	5.29202	+	3.64163	+		+	+	NaN	NaN	NaN	25.6521	25.7223	25.8019	NaN	NaN	25.5278	25.2975	NaN	25.2283	20.4949	20.4851	20.3203	25.6521	25.7223	25.8019	22.5677	19.9089	25.5278	25.2975	22.6521	25.2283	1.3144e-43	42	45.7	653820000	0	0	0	175960000	156610000	193860000	0	0	16172000	16309000
NDUFB7	P17568	NADH dehydrogenase [ubiquinone] 1 beta subcomplex subunit 7	+	4.71926	5.82667	+	4.28311	+		+	+	NaN	NaN	NaN	26.6193	25.9079	26.7279	NaN	NaN	25.9295	25.6185	NaN	25.7714	20.8188	20.6265	20.3298	26.6193	25.9079	26.7279	22.2025	20.704	25.9295	25.6185	21.5637	25.7714	3.9887e-45	37	40.9	1071100000	0	0	0	361340000	244080000	350000000	0	0	16490000	19101000
NOL3	O60936	Nucleolar protein 3	+	2.16265	1.97117		3.32788	+		+	+	NaN	NaN	NaN	23.1929	22.2735	23.3557	NaN	NaN	26.0902	25.4977	NaN	NaN	20.9481	20.4132	21.5473	23.1929	22.2735	23.3557	20.9816	20.1458	26.0902	25.4977	23.1509	22.6741	7.7995e-59	24	49	181310000	0	0	0	48796000	28142000	45874000	0	0	31768000	23293000
OGFRL1	Q5TC84	Opioid growth factor receptor-like protein 1	+	2.7351	3.34387	+	NaN			+	+	NaN	NaN	NaN	24.0195	24.1647	24.1517	NaN	NaN	NaN	NaN	NaN	NaN	20.1501	20.2947	21.8595	24.0195	24.1647	24.1517	NaN	NaN	NaN	NaN	NaN	NaN	1.2588e-24	19	20.8	159510000	0	0	0	54937000	41181000	51121000	0	0	1552900	3569200
PAFAH2	Q99487	Platelet-activating factor acetylhydrolase 2, cytoplasmic	+	1.96277	1.81733		NaN			+	+	NaN	NaN	NaN	23.0502	22.8647	22.9481	NaN	NaN	NaN	NaN	NaN	22.2909	20.9232	22.0812	20.4065	23.0502	22.8647	22.9481	NaN	NaN	NaN	NaN	NaN	NaN	2.1226e-24	21	22.4	78286000	0	0	0	31262000	18640000	23859000	0	0	0	0
PCMTD1	Q96MG8	Protein-L-isoaspartate O-methyltransferase domain-containing protein 1	+	3.86408	4.89907	+	NaN		+	+	+	NaN	NaN	NaN	25.7998	25.8413	25.7909	NaN	NaN	NaN	NaN	NaN	25.4682	20.5989	20.4174	21.7185	25.7998	25.8413	25.7909	NaN	NaN	NaN	NaN	NaN	NaN	4.2538e-28	27	28.9	572640000	0	0	0	168630000	149960000	191160000	0	0	607340	0
PCMTD2	Q9NV79	Protein-L-isoaspartate O-methyltransferase domain-containing protein 2	+	NaN	NaN		NaN			+	+	NaN	NaN	NaN	NaN	NaN	20.8024	NaN	NaN	NaN	NaN	NaN	NaN	NaN	NaN	NaN	NaN	NaN	NaN	NaN	NaN	NaN	NaN	NaN	NaN	0.00029667	3	5.5	16832000	0	0	0	4094600	5351600	4904100	0	0	0	0
PDE8A	O60658	High affinity cAMP-specific and IBMX-insensitive 3,5-cyclic phosphodiesterase 8A	+	0.066073	-0.333941		NaN			+	+	NaN	NaN	NaN	20.6614	20.1484	19.8965	NaN	NaN	NaN	NaN	NaN	NaN	20.8552	20.3646	20.4884	20.6614	20.1484	19.8965	NaN	NaN	NaN	NaN	NaN	NaN	1.6473e-05	5	3.6	10363000	0	0	0	4961900	2828700	2572100	0	0	0	0
PIK3R4	Q99570	Phosphoinositide 3-kinase regulatory subunit 4	+	3.70004	2.80822	+	NaN			+	+	NaN	NaN	NaN	23.8172	23.737	23.7085	NaN	NaN	NaN	NaN	NaN	23.2674	21.4522	20.6383	20.7476	23.8172	23.737	23.7085	NaN	NaN	NaN	NaN	NaN	NaN	1.8711e-38	32	15.9	136150000	0	0	0	46670000	40135000	37161000	0	0	0	0
PLGRKT	Q9HBL7	Plasminogen receptor (KT)	+	4.16647	3.70409	+	NaN			+	+	NaN	NaN	NaN	24.2641	24.613	24.4632	NaN	NaN	NaN	NaN	NaN	24.5568	20.29	20.8464	21.0917	24.2641	24.613	24.4632	NaN	NaN	NaN	NaN	NaN	NaN	4.9213e-21	20	32	248450000	0	0	0	63738000	74951000	73900000	0	0	1371500	0
PPM1A	P35813	Protein phosphatase 1A	+	5.22798	7.11203	+	2.46638	+	+	+	+	NaN	NaN	NaN	27.2185	27.1461	27.2239	NaN	NaN	23.1357	22.7928	NaN	26.6068	20.598	19.9462	19.7082	27.2185	27.1461	27.2239	21.3325	20.6831	23.1357	22.7928	23.1206	26.6068	2.8274e-178	102	61.8	1531600000	0	0	0	489790000	409460000	438760000	0	0	5137300	4951200
PPM1B	O75688	Protein phosphatase 1B	+	4.83217	5.42391	+	NaN		+	+	+	NaN	NaN	NaN	25.704	25.6082	25.5519	NaN	NaN	NaN	NaN	NaN	25.2016	20.1333	19.796	20.663	25.704	25.6082	25.5519	NaN	NaN	NaN	NaN	NaN	NaN	1.2828e-76	38	39.7	510660000	0	0	0	175280000	143240000	147810000	0	0	0	0
PPM1G	O15355	Protein phosphatase 1G	+	5.08839	8.77542	+	6.0972	+	+	+	+	NaN	NaN	NaN	28.658	28.6543	28.6347	NaN	NaN	28.6221	28.1816	NaN	28.3844	19.6917	19.3661	20.563	28.658	28.6543	28.6347	22.7012	21.9657	28.6221	28.1816	22.2296	28.3844	0	143	54.4	5293100000	0	0	0	1622800000	1276900000	1443900000	0	0	130710000	114800000
PPP3R1	P63098	Calcineurin subunit B type 1	+	4.94096	6.29723	+	NaN		+	+	+	NaN	NaN	NaN	26.3994	26.491	26.6206	NaN	NaN	NaN	NaN	NaN	26.5681	20.7358	19.8346	20.049	26.3994	26.491	26.6206	NaN	NaN	NaN	NaN	NaN	NaN	2.4973e-58	21	74.7	960780000	0	0	0	265750000	239640000	286150000	0	0	0	0
PRKAB1	Q9Y478	5-AMP-activated protein kinase subunit beta-1	+	3.68101	4.05051	+	NaN			+	+	NaN	NaN	NaN	24.675	24.3228	24.9151	NaN	NaN	NaN	NaN	NaN	24.0264	21.105	20.6917	19.9648	24.675	24.3228	24.9151	NaN	NaN	NaN	NaN	NaN	NaN	5.17e-49	23	55.9	257700000	0	0	0	84000000	55184000	93209000	0	0	840560	0
PRKACA	P17612	cAMP-dependent protein kinase catalytic subunit alpha	+	4.67676	7.37224	+	7.70771	+		+	+	NaN	NaN	NaN	28.2162	27.0522	28.1058	NaN	NaN	29.8851	29.4678	NaN	27.2521	20.2471	20.5305	20.4799	28.2162	27.0522	28.1058	21.5089	20.3949	29.8851	29.4678	21.5781	27.2521	2.7589e-241	81	54.1	3235300000	0	0	0	867830000	322670000	887270000	0	0	575020000	471970000
PRKACB	P22694	cAMP-dependent protein kinase catalytic subunit beta	+	5.16864	8.67738	+	6.79692	+		+	+	NaN	NaN	NaN	29.3399	28.981	29.1932	NaN	NaN	28.1484	28.4297	NaN	28.8262	20.3375	20.0333	21.1111	29.3399	28.981	29.1932	20.8818	20.7115	28.1484	28.4297	23.4202	28.8262	1.2571e-152	139	62.1	6692100000	0	0	0	2060100000	1530300000	1812600000	0	0	115470000	147360000
PRKACG	P22612	cAMP-dependent protein kinase catalytic subunit gamma	+	NaN	NaN		3.15358	+		+	+	NaN	NaN	NaN	NaN	NaN	NaN	NaN	NaN	25.654	25.1206	NaN	NaN	NaN	NaN	NaN	NaN	NaN	NaN	21.6508	20.7023	25.654	25.1206	22.0041	23.0433	1.0652e-70	9	15.1	243340000	0	0	0	66343000	21847000	68380000	0	0	30379000	18989000
PSMC1	P62191	26S protease regulatory subunit 4	+	5.09698	9.27395	+	7.6272	+	+	+	+	NaN	NaN	NaN	30.3548	30.2842	30.2096	NaN	NaN	28.349	28.6978	NaN	29.6275	20.2754	21.2539	21.4974	30.3548	30.2842	30.2096	20.9125	20.8079	28.349	28.6978	22.0723	29.6275	0	294	70.5	13803000000	521150	534620	705340	4433500000	3486700000	3808100000	0	0	135880000	174540000
PTK7	Q13308	Inactive tyrosine-protein kinase 7	+	3.47756	6.32015	+	5.83018	+		+	+	NaN	NaN	NaN	26.9482	26.7873	26.8301	NaN	NaN	27.8383	26.4166	NaN	26.92	21.6131	19.3405	20.6515	26.9482	26.7873	26.8301	21.013	20.757	27.8383	26.4166	21.9144	26.92	1.0297e-207	73	32.1	1036400000	0	0	0	215970000	197100000	201260000	0	0	99016000	206160000
RFTN1	Q14699	Raftlin	+	3.26417	6.94706	+	4.31584	+		+	+	NaN	NaN	NaN	27.6793	27.4937	27.6633	NaN	NaN	25.4386	25.665	NaN	27.0959	22.2921	20.0644	19.6386	27.6793	27.4937	27.6633	21.5591	21.637	25.4386	25.665	22.0559	27.0959	0	104	46	2154300000	0	0	0	672280000	567930000	624440000	0	0	18467000	22212000
RNF11	Q9Y3C5	RING finger protein 11	+	NaN	NaN		NaN			+	+	NaN	NaN	NaN	NaN	NaN	NaN	NaN	NaN	NaN	NaN	NaN	21.744	NaN	NaN	NaN	NaN	NaN	NaN	NaN	NaN	NaN	NaN	NaN	NaN	1.0985e-06	5	7.8	49250000	0	0	0	11930000	10896000	14398000	0	0	1895200	3622800
RNF141	Q8WVD5	RING finger protein 141	+	3.21587	2.31836	+	NaN			+	+	NaN	NaN	NaN	23.0074	23.2577	23.2063	NaN	NaN	NaN	NaN	NaN	23.2355	20.8247	20.3732	21.3184	23.0074	23.2577	23.2063	NaN	NaN	NaN	NaN	NaN	NaN	7.8407e-12	9	21.3	93297000	0	0	0	23024000	21201000	23829000	0	0	1688900	0
RP2	O75695	Protein XRP2	+	5.17215	5.47808	+	NaN			+	+	NaN	NaN	NaN	26.1877	26.1494	26.1503	NaN	NaN	NaN	NaN	NaN	26.0391	21.1084	20.4579	20.4869	26.1877	26.1494	26.1503	NaN	NaN	NaN	NaN	NaN	NaN	2.8934e-47	39	26.3	754260000	0	0	0	227110000	193620000	218340000	0	0	0	0
SAMM50	Q9Y512	Sorting and assembly machinery component 50 homolog	+	3.45521	3.44801	+	NaN			+	+	NaN	NaN	NaN	24.3552	23.8565	23.8363	NaN	NaN	NaN	NaN	NaN	22.3878	19.9326	20.9893	20.7821	24.3552	23.8565	23.8363	NaN	NaN	NaN	NaN	NaN	NaN	7.4194e-29	29	30.5	152660000	0	0	0	60947000	42281000	43717000	0	0	0	0
SCYL3	Q8IZE3	Protein-associating with the carboxyl-terminal domain of ezrin	+	1.84845	0.793209		NaN			+	+	NaN	NaN	NaN	21.985	21.6734	21.7521	NaN	NaN	NaN	NaN	NaN	NaN	20.5799	21.1782	21.2726	21.985	21.6734	21.7521	NaN	NaN	NaN	NaN	NaN	NaN	6.6326e-12	8	6.7	31936000	0	0	0	11511000	10297000	7886400	0	0	0	0
SERINC3	Q13530	Serine incorporator 3	+	4.4598	4.62988	+	NaN			+	+	NaN	NaN	NaN	24.8337	24.9071	24.8556	NaN	NaN	NaN	NaN	NaN	25.1003	20.7373	20.1607	19.8087	24.8337	24.9071	24.8556	NaN	NaN	NaN	NaN	NaN	NaN	2.6329e-21	20	13.5	325300000	0	0	0	101490000	89167000	93673000	0	0	0	0
SLC44A1	Q8WWI5	Choline transporter-like protein 1	+	5.40204	6.58528	+	3.58197	+		+	+	NaN	NaN	NaN	26.7619	26.619	26.6143	NaN	NaN	23.8738	23.6961	NaN	27.1569	19.9611	20.5031	19.7752	26.7619	26.619	26.6143	22.0143	19.9661	23.8738	23.6961	22.0006	27.1569	1.221e-88	75	26.6	1247500000	0	0	0	404760000	286620000	331470000	0	0	5076400	8844700
TMEM106B	Q9NUM4	Transmembrane protein 106B	+	6.35123	6.961	+	NaN			+	+	NaN	NaN	NaN	27.035	27.167	27.0897	NaN	NaN	NaN	NaN	NaN	26.8365	20.0062	20.0037	20.3987	27.035	27.167	27.0897	NaN	NaN	NaN	NaN	NaN	NaN	1.0444e-113	47	26.3	1457700000	0	0	0	455630000	375470000	412560000	0	0	0	827340
TOMM40	O96008	Mitochondrial import receptor subunit TOM40 homolog	+	2.70704	1.82479		NaN			+	+	NaN	NaN	NaN	23.0077	23.1645	23.0639	NaN	NaN	NaN	NaN	NaN	23.1639	21.8239	20.798	21.1398	23.0077	23.1645	23.0639	NaN	NaN	NaN	NaN	NaN	NaN	3.1047e-25	17	16.9	92100000	0	0	0	27534000	24461000	27031000	0	0	0	758100
TUSC2	O75896	Tumor suppressor candidate 2	+	0.746605	1.23282		1.34813			+	+	NaN	NaN	NaN	22.6772	22.3662	NaN	NaN	NaN	24.5833	24.2798	NaN	21.8406	20.7486	19.7659	19.915	22.6772	22.3662	19.0845	22.8931	22.1688	24.5833	24.2798	21.5973	21.8406	7.7009e-08	8	43.6	70569000	0	0	0	14994000	15912000	8487600	0	0	14198000	12206000
USP32	Q8NFA0	Ubiquitin carboxyl-terminal hydrolase 32	+	2.06763	0.63941		NaN			+	+	NaN	NaN	NaN	21.1008	21.0276	20.7392	NaN	NaN	NaN	NaN	NaN	NaN	20.2118	20.555	20.1826	21.1008	21.0276	20.7392	NaN	NaN	NaN	NaN	NaN	NaN	7.3495e-07	3	2.7	16716000	0	0	0	7102700	4053500	5559900	0	0	0	0
VKORC1	Q9BQB6	Vitamin K epoxide reductase complex subunit 1	+	NaN	NaN		NaN			+	+	NaN	NaN	NaN	NaN	NaN	NaN	NaN	NaN	NaN	NaN	NaN	22.4065	NaN	NaN	NaN	NaN	NaN	NaN	NaN	NaN	NaN	NaN	NaN	NaN	2.446e-15	5	14.7	45752000	0	0	0	13705000	13394000	8351600	0	0	0	0
YES1	P07947	Tyrosine-protein kinase Yes	+	5.78582	6.14793	+	NaN			+	+	NaN	NaN	NaN	26.2261	25.8158	26.0333	NaN	NaN	NaN	NaN	NaN	25.6561	19.928	20.0515	19.6519	26.2261	25.8158	26.0333	NaN	NaN	NaN	NaN	NaN	NaN	4.3644e-74	35	45.1	686300000	0	0	0	284750000	78686000	262870000	0	0	0	827300
ZDHHC6	Q9H6R6	Palmitoyltransferase ZDHHC6	+	0.705972	0.397685		NaN			+	+	NaN	NaN	NaN	20.9433	NaN	20.7489	NaN	NaN	NaN	NaN	NaN	NaN	20.7501	19.5372	20.6731	20.9433	20.4611	20.7489	NaN	NaN	NaN	NaN	NaN	NaN	2.615e-06	6	5.3	14999000	0	0	0	5839100	2878100	4773300	0	0	0	0
ZNRF2	Q8NHG8	E3 ubiquitin-protein ligase ZNRF2	+	4.55442	3.45549	+	NaN			+	+	NaN	NaN	NaN	23.6648	23.7306	23.5554	NaN	NaN	NaN	NaN	NaN	23.2957	20.1434	19.9034	20.5376	23.6648	23.7306	23.5554	NaN	NaN	NaN	NaN	NaN	NaN	1.4161e-105	15	45.9	155810000	0	0	0	39646000	38325000	38347000	0	0	12125000	15253000
ZZEF1	O43149	Zinc finger ZZ-type and EF-hand domain-containing protein 1	+	NaN	NaN		NaN			+	+	NaN	NaN	NaN	NaN	NaN	21.4437	NaN	NaN	NaN	NaN	NaN	NaN	NaN	NaN	NaN	NaN	NaN	NaN	NaN	NaN	NaN	NaN	NaN	NaN	3.372e-07	3	0.7	17722000	0	0	0	7700500	2372000	7649100	0	0	0	0
DDX46	Q7L014	Probable ATP-dependent RNA helicase DDX46	+	0.0946894	-0.566661		2.4834	+		+		27.4751	27.9087	26.8038	27.0247	27.5732	25.8897	24.7147	22.9019	27.982	28.0928	28.0786	27.0707	27.4751	27.9087	26.8038	27.0247	27.5732	25.8897	24.7147	22.9019	27.982	28.0928	28.0786	27.0707	6.7744e-231	260	46.6	2607200000	222850000	350930000	164940000	370130000	490030000	197620000	9106700	4322800	124360000	137230000
MTHFD1L	Q6UB35	Monofunctional C1-tetrahydrofolate synthase, mitochondrial	+	NaN	NaN		NaN			+		NaN	NaN	NaN	NaN	NaN	18.955	NaN	NaN	NaN	NaN	NaN	NaN	NaN	NaN	NaN	NaN	NaN	NaN	NaN	NaN	NaN	NaN	NaN	NaN	0.00026229	2	2.1	4793200	0	0	0	1225700	2204700	1362800	0	0	0	0
SLC25A6;SLC25A4	P12236;P12235	ADP/ATP translocase 3;ADP/ATP translocase 1	+	3.32403	3.08651	+	NaN			+		NaN	NaN	NaN	23.822	23.9942	23.6006	NaN	NaN	NaN	NaN	NaN	23.6032	20.9501	21.1477	20.0595	23.822	23.9942	23.6006	NaN	NaN	NaN	NaN	NaN	NaN	1.1716e-35	16	33.6	147280000	2363300	2400600	158760	42463000	42503000	33695000	0	0	0	0
SVIP	Q8NHG7	Small VCP/p97-interacting protein	+	NaN	NaN		NaN			+		NaN	NaN	NaN	NaN	NaN	23.7004	NaN	NaN	NaN	NaN	NaN	NaN	NaN	NaN	NaN	NaN	NaN	NaN	NaN	NaN	NaN	NaN	NaN	NaN	3.1078e-12	8	32.5	76808000	0	0	0	8286300	8490600	36555000	0	0	8049600	9896500
ANXA11	P50995	Annexin A11	+	0.552869	0.126544		NaN				+	22.0822	22.0542	21.5593	21.9446	22.232	21.8987	NaN	NaN	NaN	NaN	NaN	21.9989	22.0822	22.0542	21.5593	21.9446	22.232	21.8987	NaN	NaN	NaN	NaN	NaN	NaN	3.0816e-12	15	8.7	60662000	3155900	3529700	1911100	15023000	18419000	11859000	0	0	0	0
ARL3	P36405	ADP-ribosylation factor-like protein 3	+	1.92634	1.43587		NaN				+	NaN	NaN	NaN	22.1647	21.7558	22.0311	NaN	NaN	NaN	NaN	NaN	NaN	19.8156	20.705	21.1233	22.1647	21.7558	22.0311	NaN	NaN	NaN	NaN	NaN	NaN	3.3059e-07	9	11.5	42563000	0	0	0	14902000	8689300	14962000	0	0	0	0
ARL4C	P56559	ADP-ribosylation factor-like protein 4C	+	0.96319	0.985854		NaN				+	NaN	NaN	NaN	21.761	21.4938	21.5975	NaN	NaN	NaN	NaN	NaN	NaN	21.6078	20.9385	19.3484	21.761	21.4938	21.5975	NaN	NaN	NaN	NaN	NaN	NaN	5.1369e-07	7	24	28033000	0	0	0	10468000	7113100	8669700	0	0	0	0
ARL5A	Q9Y689	ADP-ribosylation factor-like protein 5A	+	4.48074	2.5237	+	NaN				+	NaN	NaN	NaN	22.7823	22.6481	22.8979	NaN	NaN	NaN	NaN	NaN	NaN	20.0663	20.1954	20.4956	22.7823	22.6481	22.8979	NaN	NaN	NaN	NaN	NaN	NaN	2.4621e-16	13	30.7	76401000	0	0	0	19415000	17584000	21120000	0	0	0	0
BAALC	Q8WXS3	Brain and acute leukemia cytoplasmic protein	+	NaN	NaN		NaN				+	NaN	NaN	NaN	NaN	20.5837	NaN	NaN	NaN	NaN	NaN	NaN	NaN	NaN	NaN	NaN	NaN	NaN	NaN	NaN	NaN	NaN	NaN	NaN	NaN	0.00034532	3	12.2	10058000	0	0	0	3541600	3902400	2614000	0	0	0	0
C1orf21	Q9H246	Uncharacterized protein C1orf21	+	NaN	NaN		NaN				+	NaN	NaN	NaN	NaN	20.2733	NaN	NaN	NaN	NaN	NaN	NaN	NaN	NaN	NaN	NaN	NaN	NaN	NaN	NaN	NaN	NaN	NaN	NaN	NaN	8.2313e-05	3	19.8	15049000	0	0	0	5916800	3147000	2052000	0	0	2065800	1867300
CHP1	Q99653	Calcineurin B homologous protein 1	+	5.28002	6.57149	+	6.40559	+			+	NaN	NaN	NaN	27.5283	27.5762	27.5015	NaN	NaN	28.0983	28.4309	NaN	27.1764	20.7359	20.7149	21.4407	27.5283	27.5762	27.5015	21.6973	19.7617	28.0983	28.4309	23.0299	27.1764	4.2186e-207	79	83.6	1923200000	0	0	0	416650000	385810000	389220000	0	0	240440000	212730000
CTSC	P53634	Dipeptidyl peptidase 1;Dipeptidyl peptidase 1 exclusion domain chain;Dipeptidyl peptidase 1 heavy chain;Dipeptidyl peptidase 1 light chain	+	NaN	NaN		NaN				+	NaN	NaN	NaN	NaN	NaN	20.1707	NaN	NaN	NaN	NaN	NaN	NaN	NaN	NaN	NaN	NaN	NaN	NaN	NaN	NaN	NaN	NaN	NaN	NaN	0.0017905	3	2.6	10127000	0	1022200	607420	2449300	2882700	3165200	0	0	0	0
DUSP22	Q9NRW4	Dual specificity protein phosphatase 22	+	4.28427	2.83143	+	1.34679				+	NaN	NaN	NaN	23.634	23.8269	23.5565	NaN	NaN	NaN	22.8176	NaN	23.7009	21.1673	20.6303	20.7255	23.634	23.8269	23.5565	21.1315	21.3867	21.8089	22.8176	21.7689	23.7009	9.1414e-25	19	45.1	153800000	0	0	0	51076000	44316000	42110000	0	0	1816900	2154100
FMN2	Q9NZ56	Formin-2	+	1.42146	1.0615		NaN				+	NaN	NaN	NaN	21.5298	21.8381	21.7923	NaN	NaN	NaN	NaN	NaN	NaN	19.8026	21.2222	20.9508	21.5298	21.8381	21.7923	NaN	NaN	NaN	NaN	NaN	NaN	3.511e-17	9	2.4	40399000	0	0	0	8736800	9941500	9156900	0	0	5457500	7106000
GMCL1;GMCL1P1	Q96IK5;Q8NEA9	Germ cell-less protein-like 1;Putative germ cell-less protein-like 1-like	+	NaN	NaN		NaN				+	NaN	NaN	NaN	NaN	NaN	19.7675	NaN	NaN	NaN	NaN	NaN	NaN	NaN	NaN	NaN	NaN	NaN	NaN	NaN	NaN	NaN	NaN	NaN	NaN	8.1098e-05	3	4.5	10927000	0	0	0	2038000	1959300	2393400	0	0	0	0
GNA11	P29992	Guanine nucleotide-binding protein subunit alpha-11	+	3.92126	5.39368	+	NaN				+	NaN	NaN	NaN	25.5555	25.7687	25.6716	NaN	NaN	NaN	NaN	NaN	25.3707	20.5549	19.4285	20.8313	25.5555	25.7687	25.6716	NaN	NaN	NaN	NaN	NaN	NaN	1.1957e-74	36	47.4	542110000	0	0	0	157310000	114460000	218820000	0	0	396240	0
GOLIM4	O00461	Golgi integral membrane protein 4	+	6.36187	6.54224	+	1.65531				+	NaN	NaN	NaN	26.0313	25.7493	25.8494	NaN	NaN	22.8702	21.8338	NaN	25.4545	19.4837	19.1512	19.3684	26.0313	25.7493	25.8494	21.7324	20.9405	22.8702	21.8338	22.5196	25.4545	2.2013e-167	45	23.4	613910000	0	0	0	208420000	148680000	192330000	0	0	3777000	2025300
NCALD	P61601	Neurocalcin-delta	+	3.2387	3.22349	+	3.63761	+			+	NaN	NaN	NaN	23.7082	23.8657	24.0454	NaN	NaN	25.9401	25.9662	NaN	24.3443	20.0119	21.3145	20.6224	23.7082	23.8657	24.0454	21.5239	21.4343	25.9401	25.9662	22.3796	24.3443	2.927e-102	29	85.5	319160000	0	0	0	80691000	61715000	76350000	0	0	13086000	39791000
NPHP3	Q7Z494	Nephrocystin-3	+	NaN	NaN		NaN				+	NaN	NaN	NaN	NaN	NaN	19.6907	NaN	NaN	NaN	NaN	NaN	NaN	NaN	NaN	NaN	NaN	NaN	NaN	NaN	NaN	NaN	NaN	NaN	NaN	0.0022896	3	1.1	7137900	0	0	0	2869000	1999500	2269400	0	0	0	0
OCC1	Q8TAD7	Overexpressed in colon carcinoma 1 protein	+	3.28589	3.67668	+	NaN				+	NaN	NaN	NaN	23.3892	23.2521	23.5334	NaN	NaN	NaN	NaN	NaN	NaN	19.4415	20.5453	19.1578	23.3892	23.2521	23.5334	NaN	NaN	NaN	NaN	NaN	NaN	9.8255e-46	9	57.1	103100000	0	0	0	32068000	24926000	32455000	0	0	3856600	7035600
PRKAB2	O43741	5-AMP-activated protein kinase subunit beta-2	+	5.21582	2.72549	+	NaN				+	NaN	NaN	NaN	23.3033	23.195	23.1803	NaN	NaN	NaN	NaN	NaN	22.7922	20.6053	20.3099	20.5868	23.3033	23.195	23.1803	NaN	NaN	NaN	NaN	NaN	NaN	2.8667e-26	17	32	109170000	0	0	0	40810000	27616000	27268000	0	0	3310800	1248900
PRMT1	Q99873	Protein arginine N-methyltransferase 1	+	0.279782	-0.011713		NaN				+	22.7437	22.1997	22.2476	22.347	22.413	22.3959	NaN	NaN	NaN	NaN	NaN	22.6928	22.7437	22.1997	22.2476	22.347	22.413	22.3959	NaN	NaN	NaN	NaN	NaN	NaN	1.742e-22	22	23.8	92268000	3083200	1893300	1612100	25122000	26481000	25884000	0	0	0	0
PTGFRN	Q9P2B2	Prostaglandin F2 receptor negative regulator	+	3.5958	4.47194	+	2.08061	+			+	NaN	NaN	NaN	24.9057	24.7247	25.0173	NaN	NaN	23.0306	23.1097	NaN	24.5357	19.8021	20.1958	21.234	24.9057	24.7247	25.0173	20.7576	21.2827	23.0306	23.1097	22.3938	24.5357	7.149e-53	44	21.7	314240000	0	0	0	82804000	70916000	95870000	0	0	2762400	3353500
RTN2	O75298	Reticulon-2	+	0.0970151	-0.659486		NaN				+	NaN	NaN	NaN	20.4787	NaN	20.5387	NaN	NaN	NaN	NaN	NaN	NaN	21.6125	19.87	20.5665	20.4787	19.0532	20.5387	NaN	NaN	NaN	NaN	NaN	NaN	0.00058161	2	3.1	11551000	0	0	0	4115600	3209300	4225700	0	0	0	0
SERINC1	Q9NRX5	Serine incorporator 1	+	4.82343	7.32739	+	NaN				+	NaN	NaN	NaN	26.9627	27.1412	26.8528	NaN	NaN	NaN	NaN	NaN	26.861	19.4324	19.22	20.3221	26.9627	27.1412	26.8528	NaN	NaN	NaN	NaN	NaN	NaN	9.0399e-184	38	12.8	1354500000	0	0	0	334700000	336380000	291530000	0	0	0	3830000
STBD1	O95210	Starch-binding domain-containing protein 1	+	3.5754	3.80364	+	NaN				+	NaN	NaN	NaN	24.1784	24.0408	24.2342	NaN	NaN	NaN	NaN	NaN	23.5942	20.2129	19.7837	21.0459	24.1784	24.0408	24.2342	NaN	NaN	NaN	NaN	NaN	NaN	1.5875e-61	19	31.3	185580000	0	0	0	63275000	47201000	56642000	0	0	0	0
TICAM2	Q86XR7	TIR domain-containing adapter molecule 2	+	NaN	NaN		NaN				+	NaN	NaN	NaN	NaN	NaN	20.3684	NaN	NaN	NaN	NaN	NaN	NaN	NaN	NaN	NaN	NaN	NaN	NaN	NaN	NaN	NaN	NaN	NaN	NaN	0.00040391	3	6.4	10302000	0	0	0	3179200	3492800	3630000	0	0	0	0
TLDC1	Q6P9B6	TLD domain-containing protein 1	+	3.92628	3.84408	+	NaN				+	NaN	NaN	NaN	25.4074	25.0052	25.3317	NaN	NaN	NaN	NaN	NaN	24.9142	21.9488	21.2595	21.0039	25.4074	25.0052	25.3317	NaN	NaN	NaN	NaN	NaN	NaN	1.2677e-73	41	34.9	409220000	0	0	0	148030000	93234000	116890000	0	0	1659100	1378800
TMEM106A	Q96A25	Transmembrane protein 106A	+	0.684265	0.269356		NaN				+	NaN	NaN	NaN	20.9155	20.8662	20.8753	NaN	NaN	NaN	NaN	NaN	NaN	21.2032	20.3794	20.2664	20.9155	20.8662	20.8753	NaN	NaN	NaN	NaN	NaN	NaN	1.7598e-07	4	9.2	15687000	0	0	0	5873400	4799100	5014100	0	0	0	0
TMEM106C	Q9BVX2	Transmembrane protein 106C	+	4.6544	2.22047	+	NaN				+	NaN	NaN	NaN	22.5168	22.4718	22.4418	NaN	NaN	NaN	NaN	NaN	NaN	20.062	20.4576	20.2494	22.5168	22.4718	22.4418	NaN	NaN	NaN	NaN	NaN	NaN	1.6419e-07	6	12	50837000	0	0	0	17587000	14027000	15678000	0	0	0	0
TMEM219	Q86XT9	Insulin-like growth factor-binding protein 3 receptor	+	1.32128	0.751884		NaN				+	NaN	NaN	NaN	21.1513	21.5483	21.1536	NaN	NaN	NaN	NaN	NaN	NaN	21.1062	20.0009	20.4904	21.1513	21.5483	21.1536	NaN	NaN	NaN	NaN	NaN	NaN	5.3758e-07	5	15	21982000	0	0	0	6843800	7447200	6401400	0	0	0	0
TSPAN3	O60637	Tetraspanin-3	+	5.78268	4.66826	+	NaN				+	NaN	NaN	NaN	25.1407	25.3377	24.9953	NaN	NaN	NaN	NaN	NaN	NaN	20.3302	20.5681	20.5706	25.1407	25.3377	24.9953	NaN	NaN	NaN	NaN	NaN	NaN	2.3592e-08	7	11.9	416430000	0	0	0	106740000	104370000	91903000	0	0	3565300	3141200
UBTD1	Q9HAC8	Ubiquitin domain-containing protein 1	+	2.568	3.2696	+	NaN				+	NaN	NaN	NaN	23.8942	23.7354	23.9865	NaN	NaN	NaN	NaN	NaN	NaN	21.0027	21.368	19.4366	23.8942	23.7354	23.9865	NaN	NaN	NaN	NaN	NaN	NaN	1.8353e-24	19	29.1	139630000	0	0	0	62754000	23251000	41124000	0	0	3071400	5665900
AK3	Q9UIJ7	GTP:AMP phosphotransferase AK3, mitochondrial	+	0.129098	-0.368845		NaN					NaN	NaN	NaN	20.3581	NaN	20.7543	NaN	NaN	NaN	NaN	NaN	NaN	20.1317	21.1547	20.312	20.3581	19.3794	20.7543	NaN	NaN	NaN	NaN	NaN	NaN	0.00015514	2	12.8	10541000	0	0	0	3825400	1879100	4836200	0	0	0	0
ARMC9	Q7Z3E5	LisH domain-containing protein ARMC9	+	2.46104	2.07446	+	NaN					NaN	NaN	NaN	22.649	22.6653	22.5383	NaN	NaN	NaN	NaN	NaN	NaN	21.183	20.6495	19.7967	22.649	22.6653	22.5383	NaN	NaN	NaN	NaN	NaN	NaN	2.1977e-17	15	10.5	53547000	0	0	0	19635000	15868000	16650000	0	0	0	0
ATP1A1	P05023	Sodium/potassium-transporting ATPase subunit alpha-1	+	3.38537	1.17696		NaN					24.3097	23.9653	24.0304	25.2696	25.4142	25.1526	NaN	NaN	NaN	NaN	22.5971	24.8652	24.3097	23.9653	24.0304	25.2696	25.4142	25.1526	NaN	NaN	NaN	NaN	NaN	NaN	2.0912e-100	72	30.3	492500000	12462000	12929000	9868800	158730000	136280000	125290000	0	0	0	0
ATP2B1	P20020	Plasma membrane calcium-transporting ATPase 1	+	0.48344	0.129934		NaN					NaN	NaN	NaN	20.8194	20.9155	20.7135	NaN	NaN	NaN	NaN	NaN	NaN	21.2118	20.3647	20.4821	20.8194	20.9155	20.7135	NaN	NaN	NaN	NaN	NaN	NaN	5.2387e-25	10	9.3	20728000	1810600	1014800	0	5694400	6416300	2721200	0	0	0	0
ATP2B4	P23634	Plasma membrane calcium-transporting ATPase 4	+	0.936948	0.279414		NaN					22.6053	22.9966	23.0158	23.2867	23.3092	22.86	NaN	NaN	NaN	NaN	NaN	22.9779	22.6053	22.9966	23.0158	23.2867	23.3092	22.86	NaN	NaN	NaN	NaN	NaN	NaN	3.1906e-32	29	12.9	128910000	6999900	5574000	4550900	37800000	33066000	23591000	0	0	0	0
BCLAF1	Q9NYF8	Bcl-2-associated transcription factor 1	+	NaN	NaN		NaN					NaN	NaN	NaN	NaN	NaN	NaN	NaN	NaN	NaN	NaN	NaN	22.8278	NaN	NaN	NaN	NaN	NaN	NaN	NaN	NaN	NaN	NaN	NaN	NaN	4.7516e-11	8	5.3	45802000	2842500	2715100	2509900	2096700	4518300	0	0	0	5260000	4977100
C11orf48	E9PRG8	Uncharacterized protein C11orf48	+	NaN	NaN		NaN					NaN	NaN	NaN	NaN	NaN	NaN	NaN	NaN	NaN	NaN	NaN	20.5898	NaN	NaN	NaN	NaN	NaN	NaN	NaN	NaN	NaN	NaN	NaN	NaN	4.7803e-11	8	10.7	39037000	5447800	3780200	2235900	5884400	5211300	5277600	667090	921960	1329000	1768600
C1orf123	Q9NWV4	UPF0587 protein C1orf123	+	NaN	NaN		NaN					NaN	NaN	NaN	NaN	NaN	19.3856	NaN	NaN	NaN	NaN	NaN	NaN	NaN	NaN	NaN	NaN	NaN	NaN	NaN	NaN	NaN	NaN	NaN	NaN	0.0047152	1	10.6	2533200	0	0	0	0	696410	1836800	0	0	0	0
CACTIN	Q8WUQ7	Cactin	+	NaN	NaN		NaN					NaN	NaN	NaN	NaN	NaN	NaN	NaN	NaN	NaN	NaN	20.2393	NaN	NaN	NaN	NaN	NaN	NaN	NaN	NaN	NaN	NaN	NaN	NaN	NaN	0.0021658	1	2	1452800	0	0	0	0	0	0	0	0	0	0
CAV2	P51636	Caveolin-2	+	4.20711	3.63733	+	NaN					NaN	NaN	NaN	24.3433	24.4072	24.1465	NaN	NaN	NaN	NaN	NaN	NaN	21.1137	20.5433	20.328	24.3433	24.4072	24.1465	NaN	NaN	NaN	NaN	NaN	NaN	3.2501e-10	7	37	170400000	0	0	0	63531000	51312000	52812000	0	0	0	0
CD151	P48509	CD151 antigen	+	5.56392	9.7113	+	NaN					NaN	NaN	NaN	30.0572	30.2432	30.1502	NaN	NaN	NaN	NaN	NaN	29.9642	20.7822	20.6841	19.8505	30.0572	30.2432	30.1502	NaN	NaN	NaN	NaN	NaN	NaN	4.0531e-52	46	29.6	11639000000	0	0	0	3366900000	3036900000	3263400000	0	0	11645000	10059000
CD59	P13987	CD59 glycoprotein	+	1.97885	0.885731		NaN					NaN	NaN	NaN	21.2131	21.1274	21.5786	NaN	NaN	NaN	NaN	NaN	NaN	20.7432	20.4524	20.0663	21.2131	21.1274	21.5786	NaN	NaN	NaN	NaN	NaN	NaN	0.00041509	5	9.4	25046000	0	0	0	7602900	5515100	8126300	0	0	0	0
CD81	P60033	CD81 antigen	+	4.39854	8.13972	+	4.54737	+				NaN	NaN	NaN	28.5604	28.6905	28.8142	NaN	NaN	25.5003	NaN	NaN	28.6397	20.6419	21.3456	19.6585	28.5604	28.6905	28.8142	20.2294	20.7198	25.5003	22.2613	21.8099	28.6397	0	102	35.6	4882500000	0	0	0	1267800000	1263600000	1439300000	0	0	17684000	20797000
CD82	P27701	CD82 antigen	+	3.05105	3.12455	+	NaN					NaN	NaN	NaN	23.6711	23.7686	23.9936	NaN	NaN	NaN	NaN	NaN	25.3604	19.8995	21.287	20.8732	23.6711	23.7686	23.9936	NaN	NaN	NaN	NaN	NaN	NaN	1.1822e-20	18	19.9	202440000	0	0	0	53784000	27918000	42967000	0	0	0	0
CD97	P48960	CD97 antigen;CD97 antigen subunit alpha;CD97 antigen subunit beta	+	1.12176	0.479895		NaN					NaN	NaN	NaN	20.8116	20.8227	20.7447	NaN	NaN	NaN	NaN	NaN	NaN	19.9547	20.1431	20.8415	20.8116	20.8227	20.7447	NaN	NaN	NaN	NaN	NaN	NaN	0.00011788	4	2.3	17180000	0	0	0	5256600	4424500	5017400	0	0	0	0
CYB5R1	Q9UHQ9	NADH-cytochrome b5 reductase 1	+	NaN	NaN		NaN					NaN	NaN	NaN	NaN	NaN	18.7525	NaN	NaN	NaN	NaN	NaN	NaN	NaN	NaN	NaN	NaN	NaN	NaN	NaN	NaN	NaN	NaN	NaN	NaN	0.0060159	2	3.6	4659000	0	0	0	1722700	1752000	1184400	0	0	0	0
DDAH2	O95865	N(G),N(G)-dimethylarginine dimethylaminohydrolase 2	+	NaN	NaN		NaN					NaN	NaN	NaN	NaN	NaN	19.7611	NaN	NaN	NaN	NaN	NaN	NaN	NaN	NaN	NaN	NaN	NaN	NaN	NaN	NaN	NaN	NaN	NaN	NaN	0.00078974	3	4.9	6484500	0	0	0	1965600	2136100	2382800	0	0	0	0
DDOST	P39656	Dolichyl-diphosphooligosaccharide--protein glycosyltransferase 48 kDa subunit	+	0.112412	-0.526355		NaN					NaN	NaN	NaN	20.2771	20.6091	20.4024	NaN	NaN	NaN	NaN	NaN	NaN	22.0686	19.8831	20.916	20.2771	20.6091	20.4024	NaN	NaN	NaN	NaN	NaN	NaN	4.1589e-07	6	7.2	11288000	0	0	0	3065400	4707300	3515700	0	0	0	0
DESI2	Q9BSY9	Desumoylating isopeptidase 2	+	NaN	NaN		NaN					NaN	NaN	NaN	NaN	NaN	19.6169	NaN	NaN	NaN	NaN	NaN	NaN	NaN	NaN	NaN	NaN	NaN	NaN	NaN	NaN	NaN	NaN	NaN	NaN	5.825e-05	3	8.8	6190100	0	0	0	1504000	2529900	2156200	0	0	0	0
DHX9	Q08211	ATP-dependent RNA helicase A	+	1.57627	1.2701		NaN					NaN	NaN	NaN	20.9996	21.9599	21.2868	NaN	NaN	NaN	NaN	NaN	NaN	20.2255	19.4673	20.7432	20.9996	21.9599	21.2868	NaN	NaN	NaN	NaN	NaN	NaN	5.9854e-17	9	7.1	46989000	1836400	1677900	1631500	8594700	7657000	7264300	0	0	9737300	0
EEF1A1P5;EEF1A1;EEF1A2	Q5VTE0;P68104;Q05639	Putative elongation factor 1-alpha-like 3;Elongation factor 1-alpha 1;Elongation factor 1-alpha 2	+	2.68122	0.719912		4.01532	+				27.3232	26.982	27.207	27.8574	27.7891	28.0254	NaN	NaN	27.8392	27.0231	27.3058	27.8647	27.3232	26.982	27.207	27.8574	27.7891	28.0254	22.3157	21.0595	27.8392	27.0231	27.3058	27.8647	0	116	42.6	3616200000	191140000	135290000	151950000	725250000	639440000	800790000	5587900	4270100	72400000	71845000
EEF1B2	P24534	Elongation factor 1-beta	+	1.06647	1.32999		NaN					NaN	22.6782	22.736	23.0478	23.4679	23.225	NaN	NaN	NaN	NaN	NaN	23.1472	20.3365	22.6782	22.736	23.0478	23.4679	23.225	NaN	NaN	NaN	NaN	NaN	NaN	2.4577e-42	20	23.6	120100000	1315200	4503500	3479300	31104000	31695000	28940000	0	0	0	0
ERO1L	Q96HE7	ERO1-like protein alpha	+	0.323216	0.0348899		NaN					NaN	NaN	NaN	19.9806	20.2809	20.3157	NaN	NaN	NaN	NaN	NaN	NaN	20.084	19.3063	21.0824	19.9806	20.2809	20.3157	NaN	NaN	NaN	NaN	NaN	NaN	5.8239e-07	8	5.6	12606000	691890	616010	244620	3028900	3139300	3520400	0	0	0	0
FADS2	O95864	Fatty acid desaturase 2	+	NaN	NaN		NaN					NaN	NaN	NaN	NaN	NaN	NaN	NaN	NaN	NaN	NaN	NaN	20.1298	NaN	NaN	NaN	NaN	NaN	NaN	NaN	NaN	NaN	NaN	NaN	NaN	3.0497e-05	4	3.4	14803000	0	0	0	4482700	4380700	3813300	0	0	0	0
FARP1	Q9Y4F1	FERM, RhoGEF and pleckstrin domain-containing protein 1	+	NaN	NaN		NaN					NaN	NaN	NaN	NaN	NaN	NaN	NaN	NaN	NaN	NaN	NaN	17.4823	NaN	NaN	NaN	NaN	NaN	NaN	NaN	NaN	NaN	NaN	NaN	NaN	0.0047564	4	1.2	2153000	0	0	0	453250	855030	505450	0	0	0	0
FKBP1A	P62942	Peptidyl-prolyl cis-trans isomerase FKBP1A	+	NaN	NaN		NaN					NaN	NaN	NaN	NaN	NaN	NaN	NaN	NaN	NaN	NaN	NaN	21.3221	NaN	NaN	NaN	NaN	NaN	NaN	NaN	NaN	NaN	NaN	NaN	NaN	6.7393e-06	4	12	26178000	1591100	1968200	942230	3805000	5776600	5117200	0	0	0	0
FLRT2	O43155	Leucine-rich repeat transmembrane protein FLRT2	+	0.124618	-0.449652		NaN					NaN	NaN	NaN	20.6527	NaN	20.5958	NaN	NaN	NaN	NaN	NaN	NaN	20.5116	20.2131	20.7402	20.6527	18.8674	20.5958	NaN	NaN	NaN	NaN	NaN	NaN	1.5813e-06	5	5	10529000	0	0	0	4918800	1454500	4155500	0	0	0	0
GAPDH	P04406	Glyceraldehyde-3-phosphate dehydrogenase	+	1.67007	0.749062		2.37268	+				27.6448	27.6949	26.9832	28.0741	28.4153	28.0806	NaN	23.0071	24.541	25.2632	26.3517	28.3212	27.6448	27.6949	26.9832	28.0741	28.4153	28.0806	21.6486	23.0071	24.541	25.2632	26.3517	28.3212	0	167	56.7	3988600000	214580000	249560000	149030000	889080000	815830000	929820000	1175200	2633600	12117000	26631000
GCLM	P48507	Glutamate--cysteine ligase regulatory subunit	+	NaN	NaN		NaN					NaN	NaN	NaN	NaN	NaN	18.4273	NaN	NaN	NaN	NaN	NaN	NaN	NaN	NaN	NaN	NaN	NaN	NaN	NaN	NaN	NaN	NaN	NaN	NaN	0.0044763	3	5.5	3132700	0	0	0	1255000	932340	945330	0	0	0	0
GNAS	P63092;Q5JWF2	Guanine nucleotide-binding protein G(s) subunit alpha isoforms short;Guanine nucleotide-binding protein G(s) subunit alpha isoforms XLas	+	2.17331	1.60754		NaN					NaN	NaN	NaN	21.9836	22.0709	21.805	NaN	NaN	NaN	NaN	NaN	NaN	20.8881	20.5162	19.6326	21.9836	22.0709	21.805	NaN	NaN	NaN	NaN	NaN	NaN	1.8075e-12	6	11.7	35538000	0	0	0	12102000	10598000	10208000	0	0	0	0
GNB1	P62873	Guanine nucleotide-binding protein G(I)/G(S)/G(T) subunit beta-1	+	1.77632	1.88094		NaN					NaN	21.9907	22.3698	23.4782	23.529	23.4357	NaN	NaN	NaN	NaN	NaN	23.5219	20.4394	21.9907	22.3698	23.4782	23.529	23.4357	NaN	NaN	NaN	NaN	NaN	NaN	1.1711e-15	21	16.8	137240000	2883500	3887100	3199700	38615000	34357000	34938000	0	0	0	0
GPR176	Q14439	Probable G-protein coupled receptor 176	+	NaN	NaN		NaN					NaN	NaN	NaN	NaN	NaN	18.6792	NaN	NaN	NaN	NaN	NaN	NaN	NaN	NaN	NaN	NaN	NaN	NaN	NaN	NaN	NaN	NaN	NaN	NaN	0.000496	4	1.9	3702800	0	0	0	1423400	1153700	1125700	0	0	0	0
GSDMD	P57764	Gasdermin-D	+	NaN	NaN		NaN					NaN	NaN	NaN	NaN	NaN	21.3974	NaN	NaN	NaN	NaN	NaN	NaN	NaN	NaN	NaN	NaN	NaN	NaN	NaN	NaN	NaN	NaN	NaN	NaN	5.0409e-06	4	5.6	20937000	0	0	0	6734500	4019600	7407600	0	0	0	0
GSTK1	Q9Y2Q3	Glutathione S-transferase kappa 1	+	0.880582	0.485293		NaN					NaN	NaN	NaN	21.7616	21.6868	21.5142	NaN	NaN	NaN	NaN	NaN	NaN	20.5251	21.7921	21.1895	21.7616	21.6868	21.5142	NaN	NaN	NaN	NaN	NaN	NaN	5.6521e-08	5	19.9	26836000	0	0	0	10596000	8170300	8070000	0	0	0	0
HMGB1;HMGB1P1	P09429;B2RPK0	High mobility group protein B1;Putative high mobility group protein B1-like 1	+	2.37186	1.28844		NaN					NaN	NaN	NaN	21.9489	21.8048	21.9595	NaN	NaN	NaN	NaN	NaN	NaN	21.04	20.1363	20.6716	21.9489	21.8048	21.9595	NaN	NaN	NaN	NaN	NaN	NaN	5.9475e-13	13	25.1	46006000	0	0	0	12254000	6465700	13387000	0	0	5142400	6157200
HSD17B4	P51659	Peroxisomal multifunctional enzyme type 2;(3R)-hydroxyacyl-CoA dehydrogenase;Enoyl-CoA hydratase 2	+	1.69639	1.2333		NaN					NaN	NaN	NaN	21.4572	21.613	21.4033	NaN	NaN	NaN	NaN	NaN	NaN	19.8916	19.8109	21.0712	21.4572	21.613	21.4033	NaN	NaN	NaN	NaN	NaN	NaN	4.5743e-14	9	9.9	25421000	0	0	0	9522000	7911700	6476200	0	0	0	0
HSP90AA1	P07900	Heat shock protein HSP 90-alpha	+	1.31821	0.247445		NaN					26.4948	26.4622	26.652	26.8142	26.9363	26.6009	NaN	NaN	NaN	NaN	26.1193	26.312	26.4948	26.4622	26.652	26.8142	26.9363	26.6009	NaN	NaN	NaN	NaN	NaN	NaN	7.1889e-177	116	41	1522400000	89444000	111240000	83812000	413070000	322900000	302620000	0	0	0	434600
IGF2R	P11717	Cation-independent mannose-6-phosphate receptor	+	NaN	NaN		NaN					NaN	NaN	NaN	NaN	NaN	21.3701	NaN	NaN	NaN	NaN	NaN	NaN	NaN	NaN	NaN	NaN	NaN	NaN	NaN	NaN	NaN	NaN	NaN	NaN	1.2111e-07	5	1.2	17193000	0	0	0	3344800	5244700	7268900	0	0	0	0
IGSF8	Q969P0	Immunoglobulin superfamily member 8	+	4.94535	2.73985	+	NaN					NaN	NaN	NaN	23.6722	23.558	23.7269	NaN	NaN	NaN	NaN	NaN	23.5254	20.792	20.8123	21.1332	23.6722	23.558	23.7269	NaN	NaN	NaN	NaN	NaN	NaN	2.1038e-39	21	21.5	133760000	0	0	0	48001000	29285000	42138000	0	0	0	0
IL17RA	Q96F46	Interleukin-17 receptor A	+	0.875949	0.35523		NaN					NaN	NaN	NaN	20.3438	20.2253	19.86	NaN	NaN	NaN	NaN	NaN	NaN	19.323	20.0575	19.9828	20.3438	20.2253	19.86	NaN	NaN	NaN	NaN	NaN	NaN	0.00014493	6	2.1	10470000	0	0	0	3867500	3080600	2530800	0	0	0	0
KIAA0753	Q2KHM9	Uncharacterized protein KIAA0753	+	NaN	NaN		NaN					NaN	NaN	NaN	NaN	NaN	NaN	NaN	NaN	NaN	NaN	NaN	22.8524	NaN	NaN	NaN	NaN	NaN	NaN	NaN	NaN	NaN	NaN	NaN	NaN	0.0054896	2	1.1	264910000	0	0	0	118000000	11948000	120930000	0	0	0	0
MCAM	P43121	Cell surface glycoprotein MUC18	+	1.75237	1.31604		NaN					NaN	NaN	NaN	21.9009	21.7638	22.0201	NaN	NaN	NaN	NaN	NaN	22.3938	20.913	19.7546	21.0692	21.9009	21.7638	22.0201	NaN	NaN	NaN	NaN	NaN	NaN	5.0219e-18	11	9.1	53839000	0	0	0	10149000	8990800	11383000	0	0	4102500	8277800
MFSD10	Q14728	Major facilitator superfamily domain-containing protein 10	+	0.716107	0.403919		NaN					NaN	NaN	NaN	20.4336	20.7404	20.4014	NaN	NaN	NaN	NaN	NaN	NaN	20.2882	19.3607	20.7148	20.4336	20.7404	20.4014	NaN	NaN	NaN	NaN	NaN	NaN	2.6768e-05	5	5.1	12202000	0	0	0	4105000	4310000	3787000	0	0	0	0
MICB	Q29980	MHC class I polypeptide-related sequence B	+	3.13333	3.22596	+	NaN					NaN	NaN	NaN	23.9254	23.1357	23.8089	NaN	NaN	NaN	NaN	NaN	23.3325	20.8323	20.6181	19.7417	23.9254	23.1357	23.8089	NaN	NaN	NaN	NaN	NaN	NaN	4.0642e-14	12	15.7	133310000	0	0	0	57319000	22179000	43067000	0	0	0	0
MRC2	Q9UBG0	C-type mannose receptor 2	+	NaN	NaN		NaN					NaN	NaN	NaN	NaN	NaN	18.417	NaN	NaN	NaN	NaN	NaN	NaN	NaN	NaN	NaN	NaN	NaN	NaN	NaN	NaN	NaN	NaN	NaN	NaN	0.00023723	4	1.8	4030300	0	0	0	450080	770290	938600	0	0	0	0
NUDC	Q9Y266	Nuclear migration protein nudC	+	0.699777	0.251223		NaN					NaN	NaN	NaN	NaN	21.111	20.6123	NaN	NaN	NaN	NaN	NaN	NaN	20.1856	20.7606	20.4343	20.4108	21.111	20.6123	NaN	NaN	NaN	NaN	NaN	NaN	0.00028821	3	6.9	13132000	0	0	0	3195500	5458200	4478100	0	0	0	0
NUTF2	P61970	Nuclear transport factor 2	+	0.584118	0.671838		NaN					NaN	NaN	NaN	21.8262	21.6974	NaN	NaN	NaN	NaN	NaN	NaN	NaN	19.8128	19.6969	21.4517	21.8262	21.6974	19.4533	NaN	NaN	NaN	NaN	NaN	NaN	6.9504e-06	5	17.3	19218000	0	0	0	10262000	8955500	0	0	0	0	0
PCBP2	Q15366	Poly(rC)-binding protein 2	+	1.50923	2.36035	+	0.658987					22.5914	NaN	NaN	23.318	23.7853	23.1602	NaN	NaN	NaN	22.7678	22.8235	23.6939	22.5914	19.4794	21.1116	23.318	23.7853	23.1602	22.3905	21.0787	21.808	22.7678	22.8235	23.6939	3.6635e-49	27	27.1	153900000	4857900	4008800	2547600	31944000	41678000	27865000	0	1194800	2628100	3045800
PCYOX1	Q9UHG3	Prenylcysteine oxidase 1	+	NaN	NaN		NaN					NaN	NaN	NaN	NaN	17.9389	NaN	NaN	NaN	NaN	NaN	NaN	NaN	NaN	NaN	NaN	NaN	NaN	NaN	NaN	NaN	NaN	NaN	NaN	NaN	0.00010715	2	5.1	1648700	0	0	0	1024800	623950	0	0	0	0	0
PLOD2	O00469	Procollagen-lysine,2-oxoglutarate 5-dioxygenase 2	+	0.574701	0.397555		NaN					NaN	NaN	NaN	NaN	21.8416	21.5893	NaN	NaN	NaN	NaN	NaN	NaN	20.8692	20.5825	20.7865	20.0001	21.8416	21.5893	NaN	NaN	NaN	NaN	NaN	NaN	6.902e-09	8	5.8	31680000	890260	767710	738840	7198500	9062100	8753200	0	0	0	0
PRDX5	P30044	Peroxiredoxin-5, mitochondrial	+	3.3245	1.68608		NaN					NaN	NaN	NaN	22.2216	22.3459	22.2385	NaN	NaN	NaN	NaN	NaN	NaN	20.9129	20.2579	20.5769	22.2216	22.3459	22.2385	NaN	NaN	NaN	NaN	NaN	NaN	3.1353e-09	9	16.8	51160000	1178100	1323200	660140	14944000	13252000	16056000	0	0	0	0
RPL10	P27635	60S ribosomal protein L10	+	1.15359	0.312824		2.6658	+				24.6519	24.4801	24.384	24.7728	24.5815	25.1001	NaN	NaN	24.0852	23.8683	24.0616	25.0482	24.6519	24.4801	24.384	24.7728	24.5815	25.1001	20.0849	20.8578	24.0852	23.8683	24.0616	25.0482	2.3396e-23	35	42.5	461530000	26306000	26681000	18366000	107790000	76469000	118710000	0	0	3700500	3798400
RPL15	P61313	60S ribosomal protein L15	+	0.0634613	-0.273155		0.629981					26.9939	27.2142	26.5903	26.5366	26.558	26.8844	26.2437	26.0662	27.5899	27.1678	27.276	26.7182	26.9939	27.2142	26.5903	26.5366	26.558	26.8844	26.2437	26.0662	27.5899	27.1678	27.276	26.7182	1.1846e-49	63	55.4	1990200000	134810000	303030000	102560000	347200000	229190000	296260000	13189000	15269000	74479000	93032000
RPL18	Q07020	60S ribosomal protein L18	+	0.00904788	-0.909966		0.932602					29.6443	28.9085	29.6191	28.5424	28.1262	28.7733	27.7435	26.1884	28.3899	28.4919	28.5488	28.3969	29.6443	28.9085	29.6191	28.5424	28.1262	28.7733	27.7435	26.1884	28.3899	28.4919	28.5488	28.3969	5.6258e-202	166	46.3	7005600000	803480000	635670000	818850000	1080400000	731520000	1366500000	50248000	20689000	153390000	197230000
RPL27	P61353	60S ribosomal protein L27	+	2.34335	2.40198	+	NaN					NaN	NaN	NaN	22.959	22.9437	23.2512	NaN	NaN	NaN	NaN	NaN	22.8116	21.5778	19.8761	20.494	22.959	22.9437	23.2512	NaN	NaN	NaN	NaN	NaN	NaN	7.5643e-10	14	27.2	89225000	882220	632680	0	26043000	24159000	31890000	0	0	0	0
RPL5	P46777	60S ribosomal protein L5	+	2.55947	0.40537		NaN					24.4359	24.1848	24.3251	24.6903	24.7266	24.745	NaN	NaN	NaN	NaN	22.2789	24.0772	24.4359	24.1848	24.3251	24.6903	24.7266	24.745	NaN	NaN	NaN	NaN	NaN	NaN	8.2202e-48	48	38.4	333290000	23032000	20112000	15420000	86926000	73899000	84742000	0	0	0	0
RPL8	P62917	60S ribosomal protein L8	+	3.5842	3.38028	+	NaN					NaN	NaN	NaN	24.0313	24.0253	23.9729	NaN	NaN	NaN	NaN	NaN	23.9673	21.046	19.9757	20.8669	24.0313	24.0253	23.9729	NaN	NaN	NaN	NaN	NaN	NaN	6.3292e-14	16	19.5	189890000	8428400	7662800	0	57035000	50615000	51067000	0	0	0	0
RPS13	P62277	40S ribosomal protein S13	+	0.0306643	-0.576405		NaN					NaN	NaN	NaN	20.3841	20.3691	20.5659	NaN	NaN	NaN	NaN	NaN	NaN	21.5656	20.5188	20.9638	20.3841	20.3691	20.5659	NaN	NaN	NaN	NaN	NaN	NaN	1.8676e-05	4	14.6	16432000	1363300	1329100	1132400	3979000	3350400	4193200	0	0	0	0
RPS17	P08708	40S ribosomal protein S17	+	NaN	NaN		NaN					NaN	NaN	NaN	NaN	22.1523	NaN	NaN	NaN	NaN	NaN	NaN	NaN	NaN	NaN	NaN	NaN	NaN	NaN	NaN	NaN	NaN	NaN	NaN	NaN	1.5298e-08	5	32.6	26403000	0	0	0	10228000	11575000	4599500	0	0	0	0
RPS23	P62266	40S ribosomal protein S23	+	2.66563	0.643697		1.93746					24.699	24.4309	24.5278	25.0417	25.2575	25.2896	NaN	NaN	24.1699	NaN	23.8184	25.2759	24.699	24.4309	24.5278	25.0417	25.2575	25.2896	21.1715	21.3815	24.1699	22.7379	23.8184	25.2759	6.5012e-16	24	30.1	563820000	13777000	12441000	8687700	143710000	110970000	141870000	0	0	6386100	2892700
RPS29	P62273	40S ribosomal protein S29	+	0.528184	0.721513		NaN					NaN	NaN	NaN	21.7477	NaN	23.055	NaN	NaN	NaN	NaN	NaN	NaN	20.8075	21.3	19.6825	21.7477	19.1518	23.055	NaN	NaN	NaN	NaN	NaN	NaN	2.8173e-08	3	32.1	34905000	0	0	0	9677500	1296300	23931000	0	0	0	0
RPS8	P62241	40S ribosomal protein S8	+	0.240042	-0.0286509		1.64812					24.367	24.4093	24.0609	24.1253	24.2033	24.4226	NaN	NaN	24.1767	NaN	23.5373	24.4715	24.367	24.4093	24.0609	24.1253	24.2033	24.4226	22.1991	19.7288	24.1767	21.7613	23.5373	24.4715	2.0922e-91	38	38.9	295520000	26066000	29227000	18198000	50535000	55046000	61730000	0	0	4579600	2637400
S1PR2	O95136	Sphingosine 1-phosphate receptor 2	+	5.53102	3.28856	+	NaN		+			NaN	NaN	NaN	23.4608	23.5341	23.5258	NaN	NaN	NaN	NaN	NaN	23.3258	20.1198	20.4204	20.1147	23.4608	23.5341	23.5258	NaN	NaN	NaN	NaN	NaN	NaN	9.7467e-33	11	15.3	116530000	0	0	0	35292000	28173000	34657000	0	0	0	0
SCARB1	Q8WTV0	Scavenger receptor class B member 1	+	4.92686	3.10842	+	NaN					NaN	NaN	NaN	23.5685	23.5869	23.5965	NaN	NaN	NaN	NaN	NaN	23.6776	20.6665	20.2057	20.5544	23.5685	23.5869	23.5965	NaN	NaN	NaN	NaN	NaN	NaN	1.4502e-13	11	9.2	138260000	0	0	0	46256000	31513000	24328000	0	0	5421200	5643000
SCARB2	Q14108	Lysosome membrane protein 2	+	5.03268	5.19058	+	3.06569	+				NaN	20.7917	NaN	26.313	26.4667	26.4096	NaN	NaN	24.6635	25.2288	NaN	26.8136	21.3219	20.7917	21.504	26.313	26.4667	26.4096	22.0303	21.8298	24.6635	25.2288	23.6487	26.8136	1.2666e-78	59	38.9	1002700000	0	1488800	890010	265820000	230860000	240070000	0	0	11089000	16704000
SEC61A1	P61619	Protein transport protein Sec61 subunit alpha isoform 1	+	3.04453	1.06337		NaN					22.6886	22.3411	22.728	23.5193	23.7808	23.6478	NaN	NaN	NaN	NaN	NaN	23.1997	22.6886	22.3411	22.728	23.5193	23.7808	23.6478	NaN	NaN	NaN	NaN	NaN	NaN	6.8007e-35	18	10.9	148550000	5495400	4893600	4760400	37156000	38514000	37726000	0	0	0	0
SLC16A3	O15427	Monocarboxylate transporter 4	+	3.75585	4.89016	+	NaN					NaN	NaN	NaN	25.5522	25.4794	25.5391	NaN	NaN	NaN	NaN	NaN	25.5921	20.3615	20.058	21.4807	25.5522	25.4794	25.5391	NaN	NaN	NaN	NaN	NaN	NaN	2.8101e-29	19	19.4	497570000	0	0	0	147180000	106580000	128290000	0	0	1181700	2110500
SLC2A3;SLC2A14	P11169;Q8TDB8	Solute carrier family 2, facilitated glucose transporter member 3;Solute carrier family 2, facilitated glucose transporter member 14	+	1.26557	0.787406		NaN					NaN	NaN	NaN	21.0034	20.7576	21.2046	NaN	NaN	NaN	NaN	NaN	NaN	20.4985	20.62	19.4849	21.0034	20.7576	21.2046	NaN	NaN	NaN	NaN	NaN	NaN	3.0932e-09	6	7.7	17006000	0	0	0	5693000	4172500	7140300	0	0	0	0
SLC30A1	Q9Y6M5	Zinc transporter 1	+	2.5452	2.43456	+	NaN					NaN	NaN	NaN	23.1087	23.3363	22.8599	NaN	NaN	NaN	NaN	NaN	NaN	21.4515	20.5781	19.9716	23.1087	23.3363	22.8599	NaN	NaN	NaN	NaN	NaN	NaN	4.4607e-29	16	21.7	82508000	0	0	0	29823000	20151000	23935000	0	0	0	0
SLC39A1	Q9NY26	Zinc transporter ZIP1	+	NaN	NaN		NaN					NaN	NaN	NaN	NaN	NaN	20.7893	NaN	NaN	NaN	NaN	NaN	NaN	NaN	NaN	NaN	NaN	NaN	NaN	NaN	NaN	NaN	NaN	NaN	NaN	0.0054921	3	3.7	15134000	0	0	0	4529400	5744500	4859800	0	0	0	0
SLC44A2	Q8IWA5	Choline transporter-like protein 2	+	3.39206	4.21122	+	NaN					NaN	NaN	NaN	24.5522	24.6282	24.5822	NaN	NaN	NaN	NaN	NaN	25.2141	20.2539	19.6434	21.2317	24.5522	24.6282	24.5822	NaN	NaN	NaN	NaN	NaN	NaN	1.253e-27	24	15.9	288370000	0	0	0	86994000	74891000	77654000	0	0	0	0
SLC7A1	P30825	High affinity cationic amino acid transporter 1	+	1.92702	3.55069	+	NaN					22.5091	NaN	NaN	24.3037	24.6052	24.6579	NaN	NaN	NaN	NaN	NaN	24.8493	22.5091	19.1162	21.2895	24.3037	24.6052	24.6579	NaN	NaN	NaN	NaN	NaN	NaN	6.0106e-33	25	8.1	281700000	3193000	2709700	1925600	84019000	59477000	79392000	0	0	606000	1336500
SPPL2A	Q8TCT8	Signal peptide peptidase-like 2A	+	0.244284	-0.0995146		NaN					NaN	NaN	NaN	21.9067	20.2689	20.5397	NaN	NaN	NaN	NaN	NaN	NaN	21.0604	21.2455	20.7078	21.9067	20.2689	20.5397	NaN	NaN	NaN	NaN	NaN	NaN	0.00036162	4	4.4	18654000	0	0	0	10806000	3154700	4693300	0	0	0	0
SURF4	O15260	Surfeit locus protein 4	+	3.0855	3.89661	+	NaN					NaN	NaN	NaN	24.6582	24.3165	24.4574	NaN	NaN	NaN	NaN	NaN	24.3424	21.218	20.9428	19.5814	24.6582	24.3165	24.4574	NaN	NaN	NaN	NaN	NaN	NaN	9.9491e-51	26	30.5	250240000	0	0	2465900	82967000	63874000	74364000	0	0	0	0
TMEM123	Q8N131	Porimin	+	NaN	NaN		NaN					NaN	NaN	NaN	NaN	NaN	NaN	NaN	NaN	NaN	NaN	NaN	24.6628	NaN	NaN	NaN	NaN	NaN	NaN	NaN	NaN	NaN	NaN	NaN	NaN	0.002079	5	4.3	195160000	0	0	0	51184000	57770000	36987000	0	0	0	0
TMEM181	Q9P2C4	Transmembrane protein 181	+	0.235119	-0.197515		NaN					NaN	NaN	NaN	21.2235	21.302	NaN	NaN	NaN	NaN	NaN	NaN	NaN	21.0297	19.7509	21.3534	21.2235	21.302	19.016	NaN	NaN	NaN	NaN	NaN	NaN	2.4763e-05	3	5.1	18524000	0	0	0	7140200	6431500	2536100	0	0	0	0
TPP1	O14773	Tripeptidyl-peptidase 1	+	2.26114	1.00905		NaN					NaN	NaN	NaN	21.1427	20.4532	20.9444	NaN	NaN	NaN	NaN	NaN	NaN	19.9776	19.6615	19.874	21.1427	20.4532	20.9444	NaN	NaN	NaN	NaN	NaN	NaN	9.6412e-07	3	7.5	15911000	0	0	0	8545000	3254700	4111200	0	0	0	0
TXNRD1	Q16881	Thioredoxin reductase 1, cytoplasmic	+	0.452391	0.144087		NaN					22.8852	21.7045	22.0201	22.376	22.2687	22.3974	NaN	NaN	NaN	NaN	22.1511	22.559	22.8852	21.7045	22.0201	22.376	22.2687	22.3974	NaN	NaN	NaN	NaN	NaN	NaN	9.9812e-23	22	15.1	81767000	5454900	3751000	3738100	19971000	16666000	19966000	0	0	0	0
UBTD2	Q8WUN7	Ubiquitin domain-containing protein 2	+	3.50049	1.9628	+	NaN					NaN	NaN	NaN	22.8622	22.5846	22.8035	NaN	NaN	NaN	NaN	NaN	NaN	20.7924	20.4664	21.1032	22.8622	22.5846	22.8035	NaN	NaN	NaN	NaN	NaN	NaN	7.9753e-24	8	30.3	63420000	0	0	0	27124000	18059000	12545000	0	0	2744200	2947400
UQCRQ	O14949	Cytochrome b-c1 complex subunit 8	+	0.0124814	-0.911016		1.16783					27.6939	28.1536	27.6875	26.9611	27.4506	26.3902	25.8862	26.58	28.3878	28.0743	27.5275	27.0353	27.6939	28.1536	27.6875	26.9611	27.4506	26.3902	25.8862	26.58	28.3878	28.0743	27.5275	27.0353	1.7453e-75	79	70.7	3019100000	327230000	459860000	246110000	405060000	523390000	273920000	9084000	17179000	88840000	67383000
YARS	P54577	Tyrosine--tRNA ligase, cytoplasmic;Tyrosine--tRNA ligase, cytoplasmic, N-terminally processed	+	0.79695	0.710523		NaN					22.0224	21.3694	NaN	21.697	22.0461	21.7201	NaN	NaN	NaN	NaN	NaN	NaN	22.0224	21.3694	19.9399	21.697	22.0461	21.7201	NaN	NaN	NaN	NaN	NaN	NaN	1.8218e-16	12	13.6	46266000	2298900	1450000	1018300	15083000	15164000	8775900	0	0	0	0
YWHAH	Q04917	14-3-3 protein eta	+	1.95716	0.96726		NaN					23.3292	23.646	24.1804	24.8547	24.679	24.5237	NaN	NaN	NaN	NaN	NaN	23.0609	23.3292	23.646	24.1804	24.8547	24.679	24.5237	NaN	NaN	NaN	NaN	NaN	NaN	3.1107e-66	38	54.5	309730000	6763900	9622000	10570000	100740000	88036000	81667000	0	0	0	0
ZMPSTE24	O75844	CAAX prenyl protease 1 homolog	+	4.28465	1.64496		NaN					NaN	NaN	NaN	21.8012	21.8511	21.648	NaN	NaN	NaN	NaN	NaN	NaN	20.1078	20.2801	19.9775	21.8012	21.8511	21.648	NaN	NaN	NaN	NaN	NaN	NaN	5.735e-17	6	6.7	32048000	0	0	0	10540000	9283800	9057100	0	0	0	0
[truncated: 15 more columns]

## Sheet: Human substrates
Gene names	Majority protein IDs	Protein names	MG motif	Log10 t-test p value Trypsin * (-1)	Log2 FC YnMyr/Myr Trypsin	t-test Significant Trypsin	Log2 FC YnMyr/Myr TEV	TEV selection Log2 FC>2	Myr peptide	Combined from Thinon et al. 2014 and Broncel et al. 2015	Castrec et al. 2018	LFQ intensity Trypsin_Myr1	LFQ intensity Trypsin_Myr2	LFQ intensity Trypsin_Myr3	LFQ intensity Trypsin_YnMyr1	LFQ intensity Trypsin_YnMyr2	LFQ intensity Trypsin_YnMyr3	LFQ intensity TEV_Myr1	LFQ intensity TEV_Myr2	LFQ intensity TEV_YnMyr1	LFQ intensity TEV_YnMyr2	LFQ intensity TEVII_Myr1	LFQ intensity TEVII_YnMyr1	Imputed LFQ intensity Trypsin_Myr1	Imputed LFQ intensity Trypsin_Myr2	Imputed LFQ intensity Trypsin_Myr3	Imputed LFQ intensity Trypsin_YnMyr1	Imputed LFQ intensity Trypsin_YnMyr2	Imputed LFQ intensity Trypsin_YnMyr3	Imputed LFQ intensity TEV_Myr1	Imputed LFQ intensity TEV_Myr2	Imputed LFQ intensity TEV_YnMyr1	Imputed LFQ intensity TEV_YnMyr2	Imputed LFQ intensity TEVII_Myr1	Imputed LFQ intensity TEVII_YnMyr1	Total Intensity	Intensity Trypsin_Myr1	Intensity Trypsin_Myr2	Intensity Trypsin_Myr3	Intensity Trypsin_YnMyr1	Intensity Trypsin_YnMyr2	Intensity Trypsin_YnMyr3	Intensity TEV_Myr1	Intensity TEV_Myr2	Intensity TEV_YnMyr1	Intensity TEV_YnMyr2	Intensity TEVII_Myr1	Intensity TEVII_YnMyr1	PEP
AIFM2	Q9BRQ8	Apoptosis-inducing factor 2	+	5.26586	6.16028	+	NaN			+	+	NaN	NaN	NaN	26.4685	26.7008	26.4433	NaN	NaN	NaN	NaN	NaN	26.2693	20.5288	20.6426	19.9604	26.4685	26.7008	26.4433	NaN	NaN	NaN	NaN	NaN	NaN	1004600000	0	0	0	337260000	284040000	270240000	0	0	0	221280	0	112840000	2.7333e-175
AKAP12	Q02952	A-kinase anchor protein 12	+	4.98916	7.75503	+	8.70258	+	+	+	+	NaN	NaN	NaN	28.2181	28.1382	28.1119	NaN	NaN	30.8146	30.8962	NaN	28.4356	20.7623	20.7048	19.736	28.2181	28.1382	28.1119	20.808	21.08	30.8146	30.8962	22.1506	28.4356	6644000000	0	0	0	1472100000	1173400000	1218100000	0	0	834960000	1067500000	0	877790000	0
ANKIB1	Q9P2G1	Ankyrin repeat and IBR domain-containing protein 1	+	2.1028	2.54084	+	NaN			+	+	NaN	NaN	NaN	22.931	22.9014	22.9698	NaN	NaN	NaN	NaN	NaN	NaN	21.6037	19.4801	20.0959	22.931	22.9014	22.9698	NaN	NaN	NaN	NaN	NaN	NaN	69698000	0	0	0	17460000	23100000	23511000	0	0	0	0	0	5626800	5.9891e-11
ARF1;ARF3	P84077;P61204	ADP-ribosylation factor 1;ADP-ribosylation factor 3	+	6.8159	12.0713	+	8.38855	+	+	+	+	NaN	NaN	NaN	32.0495	31.8131	31.9794	NaN	NaN	29.1473	28.3123	NaN	31.7099	20.2062	19.7579	19.6639	32.0495	31.8131	31.9794	22.3874	19.9622	29.1473	28.3123	21.6542	31.7099	48477000000	689900	668760	0	13565000000	14147000000	13596000000	5267800	1497700	323310000	275060000	0	6562200000	0
ARF4	P18085	ADP-ribosylation factor 4	+	5.97319	10.1595	+	6.48165	+	+	+	+	NaN	NaN	NaN	30.8975	30.8283	30.9858	NaN	NaN	27.2341	26.9318	NaN	30.5972	20.8707	20.2731	21.0893	30.8975	30.8283	30.9858	21.2169	21.5707	27.2341	26.9318	22.5305	30.5972	22700000000	0	832100	470840	6616800000	6153100000	6563900000	0	0	55549000	52738000	725930	3256500000	0
ARF5	P84085	ADP-ribosylation factor 5	+	5.10821	7.21071	+	NaN		+	+	+	NaN	NaN	NaN	27.4525	27.4615	27.6012	NaN	NaN	NaN	NaN	NaN	27.1769	20.8502	19.8977	20.1352	27.4525	27.4615	27.6012	NaN	NaN	NaN	NaN	NaN	NaN	1908400000	0	0	0	536840000	477390000	571530000	0	0	14006000	12962000	0	295680000	0
ARF6	P62330	ADP-ribosylation factor 6	+	5.36056	6.58613	+	NaN			+	+	NaN	NaN	NaN	27.5823	27.3839	27.4706	NaN	NaN	NaN	NaN	NaN	27.1717	20.5398	21.302	20.8367	27.5823	27.3839	27.4706	NaN	NaN	NaN	NaN	NaN	NaN	1982700000	0	0	0	636590000	493030000	515230000	0	0	33210000	18563000	0	286110000	7.464e-103
ARL1	P40616	ADP-ribosylation factor-like protein 1	+	4.31827	8.61969	+	3.54622	+		+	+	NaN	NaN	NaN	28.9986	27.961	29.1824	NaN	NaN	23.2214	23.3592	NaN	28.4791	20.2128	20.7132	19.3569	28.9986	27.961	29.1824	21.8155	20.5476	23.2214	23.3592	22.0579	28.4791	4725200000	0	0	0	1555700000	858540000	1650300000	0	0	6427500	9508500	0	644630000	0
BASP1	P80723	Brain acid soluble protein 1	+	2.82042	5.19564	+	4.60908	+		+	+	NaN	NaN	NaN	25.7424	25.277	25.6261	NaN	NaN	27.1483	26.986	NaN	24.7542	21.9461	19.6004	19.5121	25.7424	25.277	25.6261	22.3066	20.2767	27.1483	26.986	22.478	24.7542	1001600000	0	0	0	309540000	198800000	366540000	0	0	40955000	35846000	0	49920000	1.4582e-159
CHCHD3	Q9NX63	Coiled-coil-helix-coiled-coil-helix domain-containing protein 3, mitochondrial	+	5.37593	8.85717	+	9.11878	+		+	+	NaN	NaN	NaN	29.108	29.2131	29.1388	NaN	NaN	31.6059	31.4035	NaN	29.0578	20.6727	20.5209	19.6949	29.108	29.2131	29.1388	21.9891	20.5593	31.6059	31.4035	22.1625	29.0578	10105000000	0	0	0	1923600000	1751100000	1858300000	0	0	1825100000	1534200000	0	1213200000	1.2407e-228
CHCHD6	Q9BRQ6	Coiled-coil-helix-coiled-coil-helix domain-containing protein 6, mitochondrial	+	4.08536	2.73329	+	4.1735	+		+	+	NaN	NaN	NaN	23.9479	23.7375	23.7036	NaN	NaN	26.4065	26.2436	NaN	22.4481	21.2517	21.2428	20.6945	23.9479	23.7375	23.7036	20.6185	20.0861	26.4065	26.2436	21.8731	22.4481	245310000	0	0	0	52390000	41708000	50497000	0	0	46731000	41429000	0	12552000	7.1142e-34
CHMP6	Q96FZ7	Charged multivesicular body protein 6	+	3.9136	5.11409	+	NaN			+	+	NaN	NaN	NaN	26.0879	26.3032	26.1426	NaN	NaN	NaN	NaN	NaN	25.9997	20.8226	21.859	20.5098	26.0879	26.3032	26.1426	NaN	NaN	NaN	NaN	NaN	NaN	784910000	0	0	0	209810000	221500000	212390000	0	0	16048000	14272000	0	110890000	3.4492e-40
CYB5R3	P00387	NADH-cytochrome b5 reductase 3;NADH-cytochrome b5 reductase 3 membrane-bound form;NADH-cytochrome b5 reductase 3 soluble form	+	4.68983	7.68812	+	4.00224	+		+	+	23.8793	22.6621	22.8695	30.8708	30.5995	31.005	NaN	NaN	23.4676	23.1697	22.7735	30.6413	23.8793	22.6621	22.8695	30.8708	30.5995	31.005	21.6477	20.8508	23.4676	23.1697	22.7735	30.6413	19543000000	11881000	9411900	7984600	5796500000	4549000000	5764800000	0	0	21275000	15950000	5274100	3360500000	0
DCUN1D3	Q8IWE4	DCN1-like protein 3	+	3.08429	4.92183	+	2.02829	+		+	+	NaN	NaN	NaN	24.9892	25.5111	24.8737	NaN	NaN	NaN	22.9997	NaN	25.3112	21.4459	19.5835	19.5791	24.9892	25.5111	24.8737	21.3075	21.2388	21.6415	22.9997	21.3212	25.3112	405340000	0	0	0	140900000	101660000	101210000	0	0	0	1556300	0	60017000	5.7782e-91
DEGS1	O15121	Sphingolipid delta(4)-desaturase DES1	+	4.02888	7.11694	+	3.67893	+		+	+	NaN	NaN	NaN	27.993	26.6964	27.9843	NaN	NaN	24.8637	24.1651	NaN	27.2771	20.2859	19.98	21.057	27.993	26.6964	27.9843	21.6814	20.8865	24.8637	24.1651	22.7013	27.2771	2200500000	0	0	0	811750000	335380000	756810000	0	0	26554000	19112000	0	250900000	2.1384e-137
DYM	Q7RTS9	Dymeclin	+	4.06812	4.41648	+	NaN			+	+	NaN	NaN	NaN	24.9631	24.913	24.8881	NaN	NaN	NaN	NaN	NaN	24.834	20.8568	20.8019	19.856	24.9631	24.913	24.8881	NaN	NaN	NaN	NaN	NaN	NaN	317600000	0	0	0	99166000	82344000	90637000	0	0	329110	0	0	45128000	5.9988e-29
FAM129A	Q9BZQ8	Protein Niban	+	4.33804	7.79471	+	4.74872	+	+	+	+	NaN	NaN	NaN	27.9432	27.7549	27.8358	NaN	NaN	26.0073	25.4681	NaN	27.4006	20.6721	19.0883	20.3894	27.9432	27.7549	27.8358	21.4352	21.5159	26.0073	25.4681	21.6788	27.4006	2582800000	0	0	0	902670000	610900000	781450000	0	0	24482000	22249000	0	241070000	0
FAM129B	Q96TA1	Niban-like protein 1	+	5.36582	7.52264	+	4.53724	+	+	+	+	22.2557	21.7048	22.4007	29.8001	29.3388	29.7901	NaN	NaN	23.9656	24.3773	19.84	29.9234	22.2557	21.7048	22.4007	29.8001	29.3388	29.7901	24.0593	20.7552	23.9656	24.3773	19.84	29.9234	9155900000	6235900	4562600	5347800	2836200000	1905600000	2394500000	0	0	29548000	32186000	3743500	1937900000	0
FAM49B	Q9NUQ9	Protein FAM49B	+	3.94612	6.16445	+	4.10095	+		+	+	NaN	NaN	NaN	27.2934	27.3519	27.4215	NaN	NaN	24.8637	25.8187	NaN	27.2564	20.4851	20.9638	22.1246	27.2934	27.3519	27.4215	22.154	21.2122	24.8637	25.8187	22.2697	27.2564	1836600000	0	0	0	536610000	456210000	516210000	0	0	13518000	21338000	0	292690000	3.8849e-178
FLOT2	Q14254	Flotillin-2	+	4.31887	4.94756	+	NaN			+	+	NaN	NaN	NaN	25.5248	25.5259	25.4574	NaN	NaN	NaN	NaN	NaN	25.0614	21.1808	20.2928	20.1918	25.5248	25.5259	25.4574	NaN	NaN	NaN	NaN	NaN	NaN	463980000	0	0	0	157620000	119350000	139470000	0	0	0	0	0	47543000	1.2183e-97
FMNL2	Q96PY5	Formin-like protein 2	+	2.86615	3.34425	+	NaN			+	+	NaN	NaN	NaN	23.6291	23.7482	23.6388	NaN	NaN	NaN	NaN	NaN	23.3561	21.1583	20.4097	19.4153	23.6291	23.7482	23.6388	NaN	NaN	NaN	NaN	NaN	NaN	133260000	0	0	0	45240000	38140000	41367000	0	0	0	0	0	8509400	3.0933e-46
FYN	P06241	Tyrosine-protein kinase Fyn	+	3.03125	2.24945	+	NaN			+	+	NaN	NaN	NaN	23.8099	23.1987	23.7008	NaN	NaN	NaN	NaN	NaN	23.4694	21.7946	21.1779	20.9885	23.8099	23.1987	23.7008	NaN	NaN	NaN	NaN	NaN	NaN	135560000	0	0	0	49167000	36023000	40950000	0	0	0	385510	0	9033600	1.2787e-42
GLIPR2	Q9H4G4	Golgi-associated plant pathogenesis-related protein 1	+	2.77144	4.20251	+	3.50743	+		+	+	NaN	NaN	NaN	24.4743	25.2155	25.0539	NaN	NaN	25.4535	25.2855	NaN	24.2186	21.9775	19.9649	20.1937	24.4743	25.2155	25.0539	22.2761	20.6243	25.4535	25.2855	21.5349	24.2186	398830000	0	0	0	116610000	99092000	104990000	0	0	19704000	21575000	0	36859000	1.4552e-69
GNAI1	P63096	Guanine nucleotide-binding protein G(i) subunit alpha-1	+	5.12549	6.26451	+	NaN		+	+	+	NaN	NaN	NaN	26.9612	26.8508	26.6943	NaN	NaN	NaN	NaN	NaN	26.6622	20.1451	20.602	20.9656	26.9612	26.8508	26.6943	NaN	NaN	NaN	NaN	NaN	NaN	1203800000	0	0	0	426780000	259800000	301060000	0	0	1594200	0	0	214570000	0
GNAI2	P04899	Guanine nucleotide-binding protein G(i) subunit alpha-2	+	5.46937	8.91517	+	5.06122	+	+	+	+	NaN	NaN	NaN	29.2409	29.2513	29.2152	NaN	NaN	25.5029	25.2002	NaN	28.8558	20.8877	20.151	19.9232	29.2409	29.2513	29.2152	20.9444	20.1065	25.5029	25.2002	23.3243	28.8558	6819900000	1788800	1074700	0	2088600000	1705600000	2026500000	0	0	24569000	27470000	0	944310000	0
GNAI3	P08754	Guanine nucleotide-binding protein G(k) subunit alpha	+	6.69148	6.3287	+	NaN		+	+	+	NaN	NaN	NaN	27.3387	27.2628	27.0618	NaN	NaN	NaN	NaN	NaN	27.0542	20.7725	20.9432	20.9613	27.3387	27.2628	27.0618	NaN	NaN	NaN	NaN	NaN	NaN	1659100000	0	0	0	549100000	450950000	438640000	0	0	600510	0	0	219860000	0
GNAO1	P09471	Guanine nucleotide-binding protein G(o) subunit alpha	+	4.44931	3.36229	+	NaN			+	+	NaN	NaN	NaN	24.0347	23.8843	23.8937	NaN	NaN	NaN	NaN	NaN	23.8092	20.4372	20.9553	20.3334	24.0347	23.8843	23.8937	NaN	NaN	NaN	NaN	NaN	NaN	162330000	0	0	0	56947000	43476000	44687000	0	0	0	0	0	17219000	3.688e-59
GORASP1	Q9BQQ3	Golgi reassembly-stacking protein 1	+	2.14074	2.35527	+	NaN			+	+	NaN	NaN	NaN	23.0663	23.1567	23.4311	NaN	NaN	NaN	NaN	NaN	NaN	21.5084	19.7489	21.331	23.0663	23.1567	23.4311	NaN	NaN	NaN	NaN	NaN	NaN	81955000	0	0	0	28524000	21904000	29121000	0	0	0	0	0	2405900	5.5249e-11
GORASP2	Q9H8Y8	Golgi reassembly-stacking protein 2	+	4.89028	8.16781	+	6.63026	+	+	+	+	NaN	NaN	NaN	28.9533	29.4368	29.0646	NaN	NaN	28.303	28.1268	NaN	27.8964	21.6296	20.4595	20.8622	28.9533	29.4368	29.0646	21.4336	20.3046	28.303	28.1268	22.6973	27.8964	6830600000	0	0	0	2154100000	2065800000	2188700000	0	0	45891000	61171000	0	314940000	1.5763e-298
HCCS	P53701	Cytochrome c-type heme lyase	+	5.63652	6.94499	+	NaN			+	+	NaN	NaN	NaN	27.4155	27.5249	27.5375	NaN	NaN	NaN	NaN	NaN	27.152	20.1511	20.8158	20.676	27.4155	27.5249	27.5375	NaN	NaN	NaN	NaN	NaN	NaN	1826800000	0	0	0	579120000	504390000	449210000	0	0	6483400	6713300	0	280860000	4.9062e-155
HPCAL1;HPCA	P37235;P84074	Hippocalcin-like protein 1;Neuron-specific calcium-binding protein hippocalcin	+	4.93216	7.73311	+	7.30862	+		+	+	NaN	NaN	NaN	28.2183	27.8145	28.1039	NaN	NaN	28.9852	29.2211	NaN	27.8801	20.1921	20.9225	19.8228	28.2183	27.8145	28.1039	21.8407	21.0827	28.9852	29.2211	21.237	27.8801	3862900000	0	0	0	967960000	851850000	905060000	0	0	230210000	358040000	0	549800000	2.9537e-142
LAMTOR1	Q6IAA8	Ragulator complex protein LAMTOR1	+	5.49388	6.42485	+	4.50352	+	+	+	+	NaN	NaN	NaN	26.5019	26.707	26.3916	NaN	NaN	26.2478	26.2213	NaN	26.1458	19.8224	20.4553	20.0482	26.5019	26.707	26.3916	22.6733	20.4908	26.2478	26.2213	21.9403	26.1458	1224200000	0	0	0	349160000	357690000	295240000	0	0	34585000	42030000	0	145530000	1.9816e-201
LNP	Q9C0E8	Protein lunapark	+	6.3407	5.9277	+	NaN			+	+	NaN	NaN	NaN	26.2243	26.1988	26.1075	NaN	NaN	NaN	NaN	NaN	25.8538	20.1042	20.4687	20.1746	26.2243	26.1988	26.1075	NaN	NaN	NaN	NaN	NaN	NaN	767710000	0	0	0	249840000	198330000	222820000	0	0	1347800	781490	0	94601000	7.3338e-93
LOH12CR1	Q969J3	Loss of heterozygosity 12 chromosomal region 1 protein	+	4.45714	4.77106	+	2.03923	+		+	+	NaN	NaN	NaN	24.6901	24.7978	24.6368	NaN	NaN	NaN	22.137	NaN	24.3079	19.8691	20.446	19.4964	24.6901	24.7978	24.6368	20.8117	21.35	22.7523	22.137	20.9178	24.3079	267780000	0	0	0	76074000	74148000	74701000	0	0	2872500	2115900	0	37863000	1.4141e-71
LRRC57	Q8N9N7	Leucine-rich repeat-containing protein 57	+	4.9421	5.19291	+	NaN			+	+	NaN	NaN	NaN	25.4465	25.5348	25.6039	NaN	NaN	NaN	NaN	NaN	25.4452	19.9732	20.2837	20.7496	25.4465	25.5348	25.6039	NaN	NaN	NaN	NaN	NaN	NaN	515760000	0	0	0	181600000	145990000	141180000	0	0	0	0	0	46982000	5.8119e-37
LYN	P07948	Tyrosine-protein kinase Lyn	+	5.41407	4.82362	+	NaN			+	+	NaN	NaN	NaN	25.481	25.4452	25.5067	NaN	NaN	NaN	NaN	NaN	25.2995	20.3551	20.9105	20.6964	25.481	25.4452	25.5067	NaN	NaN	NaN	NaN	NaN	NaN	458080000	0	0	0	132020000	120500000	129570000	0	0	1745900	1129100	0	73107000	5.4255e-98
MARC2	Q969Z3	MOSC domain-containing protein 2, mitochondrial	+	2.75577	3.28258	+	NaN			+	+	NaN	NaN	NaN	24.4795	24.5626	24.4613	NaN	NaN	NaN	NaN	NaN	24.1543	20.8961	20.5028	22.2567	24.4795	24.5626	24.4613	NaN	NaN	NaN	NaN	NaN	NaN	250970000	0	0	0	91499000	60137000	85726000	0	0	0	805890	0	12806000	8.9364e-24
MARCKS	P29966	Myristoylated alanine-rich C-kinase substrate	+	4.44566	11.4991	+	10.5861	+	+	+	+	NaN	NaN	NaN	31.9009	32.0556	32.0084	NaN	NaN	32.3355	31.6047	NaN	31.6731	20.3582	21.7243	19.3851	31.9009	32.0556	32.0084	21.0445	20.794	32.3355	31.6047	22.0165	31.6731	41514000000	0	1609700	941490	9456600000	8892000000	9488200000	0	0	3315600000	3196900000	0	7162800000	0
MARCKSL1	P49006	MARCKS-related protein	+	4.09882	7.89585	+	8.06449	+	+	+	+	NaN	NaN	NaN	28.3918	28.6837	28.5124	NaN	NaN	29.4806	29.3145	NaN	28.7616	21.5955	19.6378	20.667	28.3918	28.6837	28.5124	21.3612	19.3017	29.4806	29.3145	22.7004	28.7616	4019300000	0	0	0	763900000	769870000	766540000	0	0	554650000	540860000	0	623440000	1.2609e-190
MGRN1	O60291	E3 ubiquitin-protein ligase MGRN1	+	3.58275	5.16052	+	NaN			+	+	NaN	NaN	NaN	25.4128	25.5684	25.5228	NaN	NaN	NaN	NaN	NaN	25.1289	21.3042	20.1183	19.6	25.4128	25.5684	25.5228	NaN	NaN	NaN	NaN	NaN	NaN	472390000	0	0	0	159800000	137490000	138710000	0	0	0	0	0	36384000	1.868e-72
NCS1	P62166	Neuronal calcium sensor 1	+	4.20794	5.28645	+	4.59544	+		+	+	NaN	NaN	NaN	25.8263	25.7518	26.0127	NaN	NaN	25.4171	26.0099	NaN	25.8716	20.8732	19.8786	20.9797	25.8263	25.7518	26.0127	21.0717	20.9335	25.4171	26.0099	21.5072	25.8716	780380000	0	0	0	214290000	170870000	220470000	0	0	14593000	25546000	0	134600000	5.972e-47
NDUFAF4	Q9P032	NADH dehydrogenase [ubiquinone] 1 alpha subcomplex assembly factor 4	+	7.00641	5.29202	+	3.64163	+		+	+	NaN	NaN	NaN	25.6521	25.7223	25.8019	NaN	NaN	25.5278	25.2975	NaN	25.2283	20.4949	20.4851	20.3203	25.6521	25.7223	25.8019	22.5677	19.9089	25.5278	25.2975	22.6521	25.2283	653820000	0	0	0	175960000	156610000	193860000	0	0	16172000	16309000	0	94907000	1.3144e-43
NDUFB7	P17568	NADH dehydrogenase [ubiquinone] 1 beta subcomplex subunit 7	+	4.71926	5.82667	+	4.28311	+		+	+	NaN	NaN	NaN	26.6193	25.9079	26.7279	NaN	NaN	25.9295	25.6185	NaN	25.7714	20.8188	20.6265	20.3298	26.6193	25.9079	26.7279	22.2025	20.704	25.9295	25.6185	21.5637	25.7714	1071100000	0	0	0	361340000	244080000	350000000	0	0	16490000	19101000	0	80054000	3.9887e-45
NOL3	O60936	Nucleolar protein 3	+	2.16265	1.97117		3.32788	+		+	+	NaN	NaN	NaN	23.1929	22.2735	23.3557	NaN	NaN	26.0902	25.4977	NaN	NaN	20.9481	20.4132	21.5473	23.1929	22.2735	23.3557	20.9816	20.1458	26.0902	25.4977	23.1509	22.6741	181310000	0	0	0	48796000	28142000	45874000	0	0	31768000	23293000	0	3436100	7.7995e-59
OGFRL1	Q5TC84	Opioid growth factor receptor-like protein 1	+	2.7351	3.34387	+	NaN			+	+	NaN	NaN	NaN	24.0195	24.1647	24.1517	NaN	NaN	NaN	NaN	NaN	NaN	20.1501	20.2947	21.8595	24.0195	24.1647	24.1517	NaN	NaN	NaN	NaN	NaN	NaN	159510000	0	0	0	54937000	41181000	51121000	0	0	1552900	3569200	0	7144500	1.2588e-24
PCMTD1	Q96MG8	Protein-L-isoaspartate O-methyltransferase domain-containing protein 1	+	3.86408	4.89907	+	NaN		+	+	+	NaN	NaN	NaN	25.7998	25.8413	25.7909	NaN	NaN	NaN	NaN	NaN	25.4682	20.5989	20.4174	21.7185	25.7998	25.8413	25.7909	NaN	NaN	NaN	NaN	NaN	NaN	572640000	0	0	0	168630000	149960000	191160000	0	0	607340	0	0	62282000	4.2538e-28
PIK3R4	Q99570	Phosphoinositide 3-kinase regulatory subunit 4	+	3.70004	2.80822	+	NaN			+	+	NaN	NaN	NaN	23.8172	23.737	23.7085	NaN	NaN	NaN	NaN	NaN	23.2674	21.4522	20.6383	20.7476	23.8172	23.737	23.7085	NaN	NaN	NaN	NaN	NaN	NaN	136150000	0	0	0	46670000	40135000	37161000	0	0	0	0	0	12179000	1.8711e-38
PLGRKT	Q9HBL7	Plasminogen receptor (KT)	+	4.16647	3.70409	+	NaN			+	+	NaN	NaN	NaN	24.2641	24.613	24.4632	NaN	NaN	NaN	NaN	NaN	24.5568	20.29	20.8464	21.0917	24.2641	24.613	24.4632	NaN	NaN	NaN	NaN	NaN	NaN	248450000	0	0	0	63738000	74951000	73900000	0	0	1371500	0	0	34491000	4.9213e-21
PPM1A	P35813	Protein phosphatase 1A	+	5.22798	7.11203	+	2.46638	+	+	+	+	NaN	NaN	NaN	27.2185	27.1461	27.2239	NaN	NaN	23.1357	22.7928	NaN	26.6068	20.598	19.9462	19.7082	27.2185	27.1461	27.2239	21.3325	20.6831	23.1357	22.7928	23.1206	26.6068	1531600000	0	0	0	489790000	409460000	438760000	0	0	5137300	4951200	0	183510000	2.8274e-178
PPM1B	O75688	Protein phosphatase 1B	+	4.83217	5.42391	+	NaN		+	+	+	NaN	NaN	NaN	25.704	25.6082	25.5519	NaN	NaN	NaN	NaN	NaN	25.2016	20.1333	19.796	20.663	25.704	25.6082	25.5519	NaN	NaN	NaN	NaN	NaN	NaN	510660000	0	0	0	175280000	143240000	147810000	0	0	0	0	0	44331000	1.2828e-76
PPM1G	O15355	Protein phosphatase 1G	+	5.08839	8.77542	+	6.0972	+	+	+	+	NaN	NaN	NaN	28.658	28.6543	28.6347	NaN	NaN	28.6221	28.1816	NaN	28.3844	19.6917	19.3661	20.563	28.658	28.6543	28.6347	22.7012	21.9657	28.6221	28.1816	22.2296	28.3844	5293100000	0	0	0	1622800000	1276900000	1443900000	0	0	130710000	114800000	0	703980000	0
PPP3R1	P63098	Calcineurin subunit B type 1	+	4.94096	6.29723	+	NaN		+	+	+	NaN	NaN	NaN	26.3994	26.491	26.6206	NaN	NaN	NaN	NaN	NaN	26.5681	20.7358	19.8346	20.049	26.3994	26.491	26.6206	NaN	NaN	NaN	NaN	NaN	NaN	960780000	0	0	0	265750000	239640000	286150000	0	0	0	0	0	169250000	2.4973e-58
PRKAB1	Q9Y478	5-AMP-activated protein kinase subunit beta-1	+	3.68101	4.05051	+	NaN			+	+	NaN	NaN	NaN	24.675	24.3228	24.9151	NaN	NaN	NaN	NaN	NaN	24.0264	21.105	20.6917	19.9648	24.675	24.3228	24.9151	NaN	NaN	NaN	NaN	NaN	NaN	257700000	0	0	0	84000000	55184000	93209000	0	0	840560	0	0	24466000	5.17e-49
PRKACA	P17612	cAMP-dependent protein kinase catalytic subunit alpha	+	4.67676	7.37224	+	7.70771	+		+	+	NaN	NaN	NaN	28.2162	27.0522	28.1058	NaN	NaN	29.8851	29.4678	NaN	27.2521	20.2471	20.5305	20.4799	28.2162	27.0522	28.1058	21.5089	20.3949	29.8851	29.4678	21.5781	27.2521	3235300000	0	0	0	867830000	322670000	887270000	0	0	575020000	471970000	0	110580000	2.7589e-241
PRKACB	P22694	cAMP-dependent protein kinase catalytic subunit beta	+	5.16864	8.67738	+	6.79692	+		+	+	NaN	NaN	NaN	29.3399	28.981	29.1932	NaN	NaN	28.1484	28.4297	NaN	28.8262	20.3375	20.0333	21.1111	29.3399	28.981	29.1932	20.8818	20.7115	28.1484	28.4297	23.4202	28.8262	6692100000	0	0	0	2060100000	1530300000	1812600000	0	0	115470000	147360000	0	1026300000	1.2571e-152
PRKACG	P22612	cAMP-dependent protein kinase catalytic subunit gamma	+	NaN	NaN		3.15358	+		+	+	NaN	NaN	NaN	NaN	NaN	NaN	NaN	NaN	25.654	25.1206	NaN	NaN	NaN	NaN	NaN	NaN	NaN	NaN	21.6508	20.7023	25.654	25.1206	22.0041	23.0433	243340000	0	0	0	66343000	21847000	68380000	0	0	30379000	18989000	0	37402000	1.0652e-70
PSMC1	P62191	26S protease regulatory subunit 4	+	5.09698	9.27395	+	7.6272	+	+	+	+	NaN	NaN	NaN	30.3548	30.2842	30.2096	NaN	NaN	28.349	28.6978	NaN	29.6275	20.2754	21.2539	21.4974	30.3548	30.2842	30.2096	20.9125	20.8079	28.349	28.6978	22.0723	29.6275	13803000000	521150	534620	705340	4433500000	3486700000	3808100000	0	0	135880000	174540000	0	1762500000	0
PTK7	Q13308	Inactive tyrosine-protein kinase 7	+	3.47756	6.32015	+	5.83018	+		+	+	NaN	NaN	NaN	26.9482	26.7873	26.8301	NaN	NaN	27.8383	26.4166	NaN	26.92	21.6131	19.3405	20.6515	26.9482	26.7873	26.8301	21.013	20.757	27.8383	26.4166	21.9144	26.92	1036400000	0	0	0	215970000	197100000	201260000	0	0	99016000	206160000	0	116890000	1.0297e-207
RFTN1	Q14699	Raftlin	+	3.26417	6.94706	+	4.31584	+		+	+	NaN	NaN	NaN	27.6793	27.4937	27.6633	NaN	NaN	25.4386	25.665	NaN	27.0959	22.2921	20.0644	19.6386	27.6793	27.4937	27.6633	21.5591	21.637	25.4386	25.665	22.0559	27.0959	2154300000	0	0	0	672280000	567930000	624440000	0	0	18467000	22212000	0	248970000	0
RNF141	Q8WVD5	RING finger protein 141	+	3.21587	2.31836	+	NaN			+	+	NaN	NaN	NaN	23.0074	23.2577	23.2063	NaN	NaN	NaN	NaN	NaN	23.2355	20.8247	20.3732	21.3184	23.0074	23.2577	23.2063	NaN	NaN	NaN	NaN	NaN	NaN	93297000	0	0	0	23024000	21201000	23829000	0	0	1688900	0	0	23553000	7.8407e-12
RP2	O75695	Protein XRP2	+	5.17215	5.47808	+	NaN			+	+	NaN	NaN	NaN	26.1877	26.1494	26.1503	NaN	NaN	NaN	NaN	NaN	26.0391	21.1084	20.4579	20.4869	26.1877	26.1494	26.1503	NaN	NaN	NaN	NaN	NaN	NaN	754260000	0	0	0	227110000	193620000	218340000	0	0	0	0	0	115190000	2.8934e-47
SAMM50	Q9Y512	Sorting and assembly machinery component 50 homolog	+	3.45521	3.44801	+	NaN			+	+	NaN	NaN	NaN	24.3552	23.8565	23.8363	NaN	NaN	NaN	NaN	NaN	22.3878	19.9326	20.9893	20.7821	24.3552	23.8565	23.8363	NaN	NaN	NaN	NaN	NaN	NaN	152660000	0	0	0	60947000	42281000	43717000	0	0	0	0	0	5717700	7.4194e-29
SERINC3	Q13530	Serine incorporator 3	+	4.4598	4.62988	+	NaN			+	+	NaN	NaN	NaN	24.8337	24.9071	24.8556	NaN	NaN	NaN	NaN	NaN	25.1003	20.7373	20.1607	19.8087	24.8337	24.9071	24.8556	NaN	NaN	NaN	NaN	NaN	NaN	325300000	0	0	0	101490000	89167000	93673000	0	0	0	0	0	40977000	2.6329e-21
SLC44A1	Q8WWI5	Choline transporter-like protein 1	+	5.40204	6.58528	+	3.58197	+		+	+	NaN	NaN	NaN	26.7619	26.619	26.6143	NaN	NaN	23.8738	23.6961	NaN	27.1569	19.9611	20.5031	19.7752	26.7619	26.619	26.6143	22.0143	19.9661	23.8738	23.6961	22.0006	27.1569	1247500000	0	0	0	404760000	286620000	331470000	0	0	5076400	8844700	0	210690000	1.221e-88
TMEM106B	Q9NUM4	Transmembrane protein 106B	+	6.35123	6.961	+	NaN			+	+	NaN	NaN	NaN	27.035	27.167	27.0897	NaN	NaN	NaN	NaN	NaN	26.8365	20.0062	20.0037	20.3987	27.035	27.167	27.0897	NaN	NaN	NaN	NaN	NaN	NaN	1457700000	0	0	0	455630000	375470000	412560000	0	0	0	827340	0	213220000	1.0444e-113
YES1	P07947	Tyrosine-protein kinase Yes	+	5.78582	6.14793	+	NaN			+	+	NaN	NaN	NaN	26.2261	25.8158	26.0333	NaN	NaN	NaN	NaN	NaN	25.6561	19.928	20.0515	19.6519	26.2261	25.8158	26.0333	NaN	NaN	NaN	NaN	NaN	NaN	686300000	0	0	0	284750000	78686000	262870000	0	0	0	827300	0	59175000	4.3644e-74
ZNRF2	Q8NHG8	E3 ubiquitin-protein ligase ZNRF2	+	4.55442	3.45549	+	NaN			+	+	NaN	NaN	NaN	23.6648	23.7306	23.5554	NaN	NaN	NaN	NaN	NaN	23.2957	20.1434	19.9034	20.5376	23.6648	23.7306	23.5554	NaN	NaN	NaN	NaN	NaN	NaN	155810000	0	0	0	39646000	38325000	38347000	0	0	12125000	15253000	0	12117000	1.4161e-105
DDX46	Q7L014	Probable ATP-dependent RNA helicase DDX46	+	0.0946894	-0.566661		2.4834	+		+		27.4751	27.9087	26.8038	27.0247	27.5732	25.8897	24.7147	22.9019	27.982	28.0928	28.0786	27.0707	27.4751	27.9087	26.8038	27.0247	27.5732	25.8897	24.7147	22.9019	27.982	28.0928	28.0786	27.0707	2607200000	222850000	350930000	164940000	370130000	490030000	197620000	9106700	4322800	124360000	137230000	300780000	234930000	6.7744e-231
SLC25A6;SLC25A4	P12236;P12235	ADP/ATP translocase 3;ADP/ATP translocase 1	+	3.32403	3.08651	+	NaN			+		NaN	NaN	NaN	23.822	23.9942	23.6006	NaN	NaN	NaN	NaN	NaN	23.6032	20.9501	21.1477	20.0595	23.822	23.9942	23.6006	NaN	NaN	NaN	NaN	NaN	NaN	147280000	2363300	2400600	158760	42463000	42503000	33695000	0	0	0	0	0	23695000	1.1716e-35
ARL5A	Q9Y689	ADP-ribosylation factor-like protein 5A	+	4.48074	2.5237	+	NaN				+	NaN	NaN	NaN	22.7823	22.6481	22.8979	NaN	NaN	NaN	NaN	NaN	NaN	20.0663	20.1954	20.4956	22.7823	22.6481	22.8979	NaN	NaN	NaN	NaN	NaN	NaN	76401000	0	0	0	19415000	17584000	21120000	0	0	0	0	0	18282000	2.4621e-16
CHP1	Q99653	Calcineurin B homologous protein 1	+	5.28002	6.57149	+	6.40559	+			+	NaN	NaN	NaN	27.5283	27.5762	27.5015	NaN	NaN	28.0983	28.4309	NaN	27.1764	20.7359	20.7149	21.4407	27.5283	27.5762	27.5015	21.6973	19.7617	28.0983	28.4309	23.0299	27.1764	1923200000	0	0	0	416650000	385810000	389220000	0	0	240440000	212730000	0	278350000	4.2186e-207
DUSP22	Q9NRW4	Dual specificity protein phosphatase 22	+	4.28427	2.83143	+	1.34679				+	NaN	NaN	NaN	23.634	23.8269	23.5565	NaN	NaN	NaN	22.8176	NaN	23.7009	21.1673	20.6303	20.7255	23.634	23.8269	23.5565	21.1315	21.3867	21.8089	22.8176	21.7689	23.7009	153800000	0	0	0	51076000	44316000	42110000	0	0	1816900	2154100	0	12330000	9.1414e-25
GNA11	P29992	Guanine nucleotide-binding protein subunit alpha-11	+	3.92126	5.39368	+	NaN				+	NaN	NaN	NaN	25.5555	25.7687	25.6716	NaN	NaN	NaN	NaN	NaN	25.3707	20.5549	19.4285	20.8313	25.5555	25.7687	25.6716	NaN	NaN	NaN	NaN	NaN	NaN	542110000	0	0	0	157310000	114460000	218820000	0	0	396240	0	0	51121000	1.1957e-74
GOLIM4	O00461	Golgi integral membrane protein 4	+	6.36187	6.54224	+	1.65531				+	NaN	NaN	NaN	26.0313	25.7493	25.8494	NaN	NaN	22.8702	21.8338	NaN	25.4545	19.4837	19.1512	19.3684	26.0313	25.7493	25.8494	21.7324	20.9405	22.8702	21.8338	22.5196	25.4545	613910000	0	0	0	208420000	148680000	192330000	0	0	3777000	2025300	0	58681000	2.2013e-167
NCALD	P61601	Neurocalcin-delta	+	3.2387	3.22349	+	3.63761	+			+	NaN	NaN	NaN	23.7082	23.8657	24.0454	NaN	NaN	25.9401	25.9662	NaN	24.3443	20.0119	21.3145	20.6224	23.7082	23.8657	24.0454	21.5239	21.4343	25.9401	25.9662	22.3796	24.3443	319160000	0	0	0	80691000	61715000	76350000	0	0	13086000	39791000	0	47527000	2.927e-102
OCC1	Q8TAD7	Overexpressed in colon carcinoma 1 protein	+	3.28589	3.67668	+	NaN				+	NaN	NaN	NaN	23.3892	23.2521	23.5334	NaN	NaN	NaN	NaN	NaN	NaN	19.4415	20.5453	19.1578	23.3892	23.2521	23.5334	NaN	NaN	NaN	NaN	NaN	NaN	103100000	0	0	0	32068000	24926000	32455000	0	0	3856600	7035600	0	2754700	9.8255e-46
PRKAB2	O43741	5-AMP-activated protein kinase subunit beta-2	+	5.21582	2.72549	+	NaN				+	NaN	NaN	NaN	23.3033	23.195	23.1803	NaN	NaN	NaN	NaN	NaN	22.7922	20.6053	20.3099	20.5868	23.3033	23.195	23.1803	NaN	NaN	NaN	NaN	NaN	NaN	109170000	0	0	0	40810000	27616000	27268000	0	0	3310800	1248900	0	8917000	2.8667e-26
PTGFRN	Q9P2B2	Prostaglandin F2 receptor negative regulator	+	3.5958	4.47194	+	2.08061	+			+	NaN	NaN	NaN	24.9057	24.7247	25.0173	NaN	NaN	23.0306	23.1097	NaN	24.5357	19.8021	20.1958	21.234	24.9057	24.7247	25.0173	20.7576	21.2827	23.0306	23.1097	22.3938	24.5357	314240000	0	0	0	82804000	70916000	95870000	0	0	2762400	3353500	0	58532000	7.149e-53
SERINC1	Q9NRX5	Serine incorporator 1	+	4.82343	7.32739	+	NaN				+	NaN	NaN	NaN	26.9627	27.1412	26.8528	NaN	NaN	NaN	NaN	NaN	26.861	19.4324	19.22	20.3221	26.9627	27.1412	26.8528	NaN	NaN	NaN	NaN	NaN	NaN	1354500000	0	0	0	334700000	336380000	291530000	0	0	0	3830000	0	388060000	9.0399e-184
STBD1	O95210	Starch-binding domain-containing protein 1	+	3.5754	3.80364	+	NaN				+	NaN	NaN	NaN	24.1784	24.0408	24.2342	NaN	NaN	NaN	NaN	NaN	23.5942	20.2129	19.7837	21.0459	24.1784	24.0408	24.2342	NaN	NaN	NaN	NaN	NaN	NaN	185580000	0	0	0	63275000	47201000	56642000	0	0	0	0	0	18462000	1.5875e-61
TLDC1	Q6P9B6	TLD domain-containing protein 1	+	3.92628	3.84408	+	NaN				+	NaN	NaN	NaN	25.4074	25.0052	25.3317	NaN	NaN	NaN	NaN	NaN	24.9142	21.9488	21.2595	21.0039	25.4074	25.0052	25.3317	NaN	NaN	NaN	NaN	NaN	NaN	409220000	0	0	0	148030000	93234000	116890000	0	0	1659100	1378800	0	48033000	1.2677e-73
TMEM106C	Q9BVX2	Transmembrane protein 106C	+	4.6544	2.22047	+	NaN				+	NaN	NaN	NaN	22.5168	22.4718	22.4418	NaN	NaN	NaN	NaN	NaN	NaN	20.062	20.4576	20.2494	22.5168	22.4718	22.4418	NaN	NaN	NaN	NaN	NaN	NaN	50837000	0	0	0	17587000	14027000	15678000	0	0	0	0	0	3544900	1.6419e-07
TSPAN3	O60637	Tetraspanin-3	+	5.78268	4.66826	+	NaN				+	NaN	NaN	NaN	25.1407	25.3377	24.9953	NaN	NaN	NaN	NaN	NaN	NaN	20.3302	20.5681	20.5706	25.1407	25.3377	24.9953	NaN	NaN	NaN	NaN	NaN	NaN	416430000	0	0	0	106740000	104370000	91903000	0	0	3565300	3141200	0	106710000	2.3592e-08
UBTD1	Q9HAC8	Ubiquitin domain-containing protein 1	+	2.568	3.2696	+	NaN				+	NaN	NaN	NaN	23.8942	23.7354	23.9865	NaN	NaN	NaN	NaN	NaN	NaN	21.0027	21.368	19.4366	23.8942	23.7354	23.9865	NaN	NaN	NaN	NaN	NaN	NaN	139630000	0	0	0	62754000	23251000	41124000	0	0	3071400	5665900	0	3762000	1.8353e-24
ARMC9	Q7Z3E5	LisH domain-containing protein ARMC9	+	2.46104	2.07446	+	NaN					NaN	NaN	NaN	22.649	22.6653	22.5383	NaN	NaN	NaN	NaN	NaN	NaN	21.183	20.6495	19.7967	22.649	22.6653	22.5383	NaN	NaN	NaN	NaN	NaN	NaN	53547000	0	0	0	19635000	15868000	16650000	0	0	0	0	0	1393800	2.1977e-17
CAV2	P51636	Caveolin-2	+	4.20711	3.63733	+	NaN					NaN	NaN	NaN	24.3433	24.4072	24.1465	NaN	NaN	NaN	NaN	NaN	NaN	21.1137	20.5433	20.328	24.3433	24.4072	24.1465	NaN	NaN	NaN	NaN	NaN	NaN	170400000	0	0	0	63531000	51312000	52812000	0	0	0	0	0	2749700	3.2501e-10
CD151	P48509	CD151 antigen	+	5.56392	9.7113	+	NaN					NaN	NaN	NaN	30.0572	30.2432	30.1502	NaN	NaN	NaN	NaN	NaN	29.9642	20.7822	20.6841	19.8505	30.0572	30.2432	30.1502	NaN	NaN	NaN	NaN	NaN	NaN	11639000000	0	0	0	3366900000	3036900000	3263400000	0	0	11645000	10059000	0	1950300000	4.0531e-52
CD81	P60033	CD81 antigen	+	4.39854	8.13972	+	4.54737	+				NaN	NaN	NaN	28.5604	28.6905	28.8142	NaN	NaN	25.5003	NaN	NaN	28.6397	20.6419	21.3456	19.6585	28.5604	28.6905	28.8142	20.2294	20.7198	25.5003	22.2613	21.8099	28.6397	4882500000	0	0	0	1267800000	1263600000	1439300000	0	0	17684000	20797000	0	873250000	0
CD82	P27701	CD82 antigen	+	3.05105	3.12455	+	NaN					NaN	NaN	NaN	23.6711	23.7686	23.9936	NaN	NaN	NaN	NaN	NaN	25.3604	19.8995	21.287	20.8732	23.6711	23.7686	23.9936	NaN	NaN	NaN	NaN	NaN	NaN	202440000	0	0	0	53784000	27918000	42967000	0	0	0	0	0	77771000	1.1822e-20
IGSF8	Q969P0	Immunoglobulin superfamily member 8	+	4.94535	2.73985	+	NaN					NaN	NaN	NaN	23.6722	23.558	23.7269	NaN	NaN	NaN	NaN	NaN	23.5254	20.792	20.8123	21.1332	23.6722	23.558	23.7269	NaN	NaN	NaN	NaN	NaN	NaN	133760000	0	0	0	48001000	29285000	42138000	0	0	0	0	0	14339000	2.1038e-39
MICB	Q29980	MHC class I polypeptide-related sequence B	+	3.13333	3.22596	+	NaN					NaN	NaN	NaN	23.9254	23.1357	23.8089	NaN	NaN	NaN	NaN	NaN	23.3325	20.8323	20.6181	19.7417	23.9254	23.1357	23.8089	NaN	NaN	NaN	NaN	NaN	NaN	133310000	0	0	0	57319000	22179000	43067000	0	0	0	0	0	10742000	4.0642e-14
RPL27	P61353	60S ribosomal protein L27	+	2.34335	2.40198	+	NaN					NaN	NaN	NaN	22.959	22.9437	23.2512	NaN	NaN	NaN	NaN	NaN	22.8116	21.5778	19.8761	20.494	22.959	22.9437	23.2512	NaN	NaN	NaN	NaN	NaN	NaN	89225000	882220	632680	0	26043000	24159000	31890000	0	0	0	0	0	5618200	7.5643e-10
RPL8	P62917	60S ribosomal protein L8	+	3.5842	3.38028	+	NaN					NaN	NaN	NaN	24.0313	24.0253	23.9729	NaN	NaN	NaN	NaN	NaN	23.9673	21.046	19.9757	20.8669	24.0313	24.0253	23.9729	NaN	NaN	NaN	NaN	NaN	NaN	189890000	8428400	7662800	0	57035000	50615000	51067000	0	0	0	0	0	15080000	6.3292e-14
S1PR2	O95136	Sphingosine 1-phosphate receptor 2	+	5.53102	3.28856	+	NaN		+			NaN	NaN	NaN	23.4608	23.5341	23.5258	NaN	NaN	NaN	NaN	NaN	23.3258	20.1198	20.4204	20.1147	23.4608	23.5341	23.5258	NaN	NaN	NaN	NaN	NaN	NaN	116530000	0	0	0	35292000	28173000	34657000	0	0	0	0	0	18408000	9.7467e-33
SCARB1	Q8WTV0	Scavenger receptor class B member 1	+	4.92686	3.10842	+	NaN					NaN	NaN	NaN	23.5685	23.5869	23.5965	NaN	NaN	NaN	NaN	NaN	23.6776	20.6665	20.2057	20.5544	23.5685	23.5869	23.5965	NaN	NaN	NaN	NaN	NaN	NaN	138260000	0	0	0	46256000	31513000	24328000	0	0	5421200	5643000	0	25100000	1.4502e-13
SCARB2	Q14108	Lysosome membrane protein 2	+	5.03268	5.19058	+	3.06569	+				NaN	20.7917	NaN	26.313	26.4667	26.4096	NaN	NaN	24.6635	25.2288	NaN	26.8136	21.3219	20.7917	21.504	26.313	26.4667	26.4096	22.0303	21.8298	24.6635	25.2288	23.6487	26.8136	1002700000	0	1488800	890010	265820000	230860000	240070000	0	0	11089000	16704000	0	235820000	1.2666e-78
SLC16A3	O15427	Monocarboxylate transporter 4	+	3.75585	4.89016	+	NaN					NaN	NaN	NaN	25.5522	25.4794	25.5391	NaN	NaN	NaN	NaN	NaN	25.5921	20.3615	20.058	21.4807	25.5522	25.4794	25.5391	NaN	NaN	NaN	NaN	NaN	NaN	497570000	0	0	0	147180000	106580000	128290000	0	0	1181700	2110500	0	112230000	2.8101e-29
SLC30A1	Q9Y6M5	Zinc transporter 1	+	2.5452	2.43456	+	NaN					NaN	NaN	NaN	23.1087	23.3363	22.8599	NaN	NaN	NaN	NaN	NaN	NaN	21.4515	20.5781	19.9716	23.1087	23.3363	22.8599	NaN	NaN	NaN	NaN	NaN	NaN	82508000	0	0	0	29823000	20151000	23935000	0	0	0	0	0	8599000	4.4607e-29
SLC44A2	Q8IWA5	Choline transporter-like protein 2	+	3.39206	4.21122	+	NaN					NaN	NaN	NaN	24.5522	24.6282	24.5822	NaN	NaN	NaN	NaN	NaN	25.2141	20.2539	19.6434	21.2317	24.5522	24.6282	24.5822	NaN	NaN	NaN	NaN	NaN	NaN	288370000	0	0	0	86994000	74891000	77654000	0	0	0	0	0	48827000	1.253e-27
SLC7A1	P30825	High affinity cationic amino acid transporter 1	+	1.92702	3.55069	+	NaN					22.5091	NaN	NaN	24.3037	24.6052	24.6579	NaN	NaN	NaN	NaN	NaN	24.8493	22.5091	19.1162	21.2895	24.3037	24.6052	24.6579	NaN	NaN	NaN	NaN	NaN	NaN	281700000	3193000	2709700	1925600	84019000	59477000	79392000	0	0	606000	1336500	0	49038000	6.0106e-33
SURF4	O15260	Surfeit locus protein 4	+	3.0855	3.89661	+	NaN					NaN	NaN	NaN	24.6582	24.3165	24.4574	NaN	NaN	NaN	NaN	NaN	24.3424	21.218	20.9428	19.5814	24.6582	24.3165	24.4574	NaN	NaN	NaN	NaN	NaN	NaN	250240000	0	0	2465900	82967000	63874000	74364000	0	0	0	0	0	26570000	9.9491e-51
UBTD2	Q8WUN7	Ubiquitin domain-containing protein 2	+	3.50049	1.9628	+	NaN					NaN	NaN	NaN	22.8622	22.5846	22.8035	NaN	NaN	NaN	NaN	NaN	NaN	20.7924	20.4664	21.1032	22.8622	22.5846	22.8035	NaN	NaN	NaN	NaN	NaN	NaN	63420000	0	0	0	27124000	18059000	12545000	0	0	2744200	2947400	0	0	7.9753e-24
[truncated: 15 more columns]
