# Supplementary material for: Profiling of myristoylation in Toxoplasma gondii reveals an N-myristoylated protein important for host cell penetration
Source: eLife. 2020 Jul 3;9:e57861. doi: 10.7554/eLife.57861 (PMC7373427; doi:10.7554/eLife.57861)
Supplement: Supplementary file 3. — Chemical inhibition of TgNMT. Sheet 1: Response of YnMyr enriched Toxoplasma proteins to NMTi. Sheet 2: NMTi does not significantly affect Toxoplasma proteome. Sheet 3: Response of base-sensitive Toxoplasma proteins to NMTi. Sheet 4: Response of YnMyr enriched Human proteins to NMTi. Sheet 5: NMTi does not significantly affect Human proteome. [file elife-57861-supp3.xlsx]

## Sheet: Legend
Supplementary file 3: Chemical inhibition of TgNMT
Human foreskin fibroblasts infected with Toxoplasma gondii were treated for 5h with 25 µM YnMyr and varying concentrations of NMTi (0, 0.05 and 0.5 µM), each in triplicate. Following cell lysis, tagged proteins were captured via click chemistry and enriched on streptavidin beads. Pulled down proteins were digested with trypsin and analyzed by LC-MS/MS. The data were analyzed with MaxQuant (versio…
Sheet 1: Response of YnMyr enriched Toxoplasma proteins to NMTi
The data were filtered to remove host proteins. To calculate protein response to NMTi a modified t-test (FDR = 0.05 and log2 FC > 0.5) was performed between untreated (NMTi 0) and inhibitor treated (NMTi 0.5) samples. LFQ intensities and the number of "razor + unique peptides" are displayed for each sample. In addition, t-test parameters (-log10 p-value and log2 FC YnMyr/NMTi ), identification sc…
Sheet 2: NMTi does not significantly affect Toxoplasma proteome
The data were filtered to remove host proteins. To verify that NMTi does not significantly change protein abundance a modified t-test (FDR = 0.05 and log2 FC > 0.5) was performed between untreated (NMTi 0) and inhibitor treated (NMTi 0.5) samples. LFQ intensities and the number of "razor + unique peptides" are displayed for each sample. In addition, t-test parameters (-log10 p-value and log2 FC Y…
Sheet 3: Response of base sensitive Toxoplasma proteins to NMTi
The data were filtered to remove host proteins and those not assigned previously as base sensitive. To calculate protein response to NMTi a modified t-test (FDR = 0.05 and log2 FC > 0.5) was performed between untreated (NMTi 0) and inhibitor treated (NMTi 0.5) samples. LFQ intensities and the number of "razor + unique peptides" are displayed for each sample. In addition, t-test parameters (-log10…
Sheet 4: Response of YnMyr enriched Human proteins to NMTi
The data were filtered to remove parasite proteins. To calculate protein response to NMTi a modified t-test (FDR = 0.05 and log2 FC > 0.5) was performed between untreated (NMTi 0) and inhibitor treated (NMTi 0.5) samples. LFQ intensities and the number of "razor + unique peptides" are displayed for each sample. In addition, t-test parameters (-log10 p-value and log2 FC YnMyr/NMTi ), identificatio…
Sheet 5: NMTi does not significantly affect Human proteome
The data were filtered to remove parasite proteins. To verify that NMTi does not significantly change protein abundance a modified t-test (FDR = 0.05 and log2 FC > 0.5) was performed between untreated (NMTi 0) and inhibitor treated (NMTi 0.5) samples. LFQ intensities and the number of "razor + unique peptides" are displayed for each sample. In addition, t-test parameters (-log10 p-value and log2 …

## Sheet: Response Toxo
Significant response to NMTi	Protein IDs	Protein name	SignalP Peptide	# TM Domains	LFQ intensity NMTi0_1	LFQ intensity NMTi0_2	LFQ intensity NMTi0_3	LFQ intensity NMTi0.05_1	LFQ intensity NMTi0.05_2	LFQ intensity NMTi0.05_3	LFQ intensity NMTi0.5_1	LFQ intensity NMTi0.5_2	LFQ intensity NMTi0.5_3	Log10 t-test p value*(-1)	Log2 FC YnMyr/NMTi	MG motif_Toxo	t-test Significant_Trypsin	TEV selection Log2 FC>2	N3-biotin selection Log2 FC>2	Myr peptide	Palmitoylated (Foe et al. 2015)	Palmitoylated (Caballero et al. 2016)	P. falciparum myristoylated (Wright et al. 2014)	Score	MS/MS Count	Sequence coverage [%]	Total Intensity	Intensity NMTi0_1	Intensity NMTi0_2	Intensity NMTi0_3	Intensity NMTi0.05_1	Intensity NMTi0.05_2	Intensity NMTi0.05_3	Intensity NMTi0.5_1	Intensity NMTi0.5_2	Intensity NMTi0.5_3	Razor + unique peptides NMTi0_1	Razor + unique peptides NMTi0_2	Razor + unique peptides NMTi0_3	Razor + unique peptides NMTi0.05_1	Razor + unique peptides NMTi0.05_2	Razor + unique peptides NMTi0.05_3	Razor + unique peptides NMTi0.5_1	Razor + unique peptides NMTi0.5_2	Razor + unique peptides NMTi0.5_3	Mol. weight [kDa]
+	TGVEG_223940;TGGT1_223940	GAP45;GAP45 protein	N/A	0	32.089	32.2651	32.5613	31.9851	31.9527	31.8193	30.1926	29.8649	29.7264	3.58359	2.37717	+	+	+	+	+	+	+	+	289.79	275	57.6	10.485	9.82816	9.71261	9.82248	9.51939	9.5432	9.58339	8.70462	8.69133	8.58439	13	13	12	11	11	11	9	9	9	27.318
+	TGVEG_232280;TGGT1_232280;TGME49_232280	hypothetical protein	N/A	0	30.1731	30.1215	30.27	30.2499	30.4639	30.1179	29.7461	29.5976	29.5508	2.79447	0.556671	+	+	+	+	+		+		254.57	251	81.5	9.97088	9.10418	9.10178	9.1503	9.02485	9.09079	9.11962	8.74515	8.73881	8.8389	18	19	18	17	18	18	17	17	17	30.148
+	TGGT1_232815;TGVEG_232815;TGME49_232815	Erv1 / Alr family protein	N/A	0	24.2489	24.5662	24.3612	24.1982	24.0473	24.1168	21.8544	22.0475	21.9712	4.63062	2.43442	+	+	+		+				25.669	18	11.4	8.09576	7.31448	7.4098	7.24388	7.2404	7.18583	7.27921	6.38609	6.50861	6.53209	2	2	2	2	2	2	2	2	2	27.622
+	TGGT1_240630;TGVEG_240630;TGME49_240630	ULK kinase	N/A	0	25.7908	26.2299	26.0605	25.7929	25.8425	26.0023	24.5662	24.538	24.6095	3.44734	1.45586	+	+			+			+	72.139	94	47	8.63857	7.82718	7.7263	7.85439	7.87084	7.74382	7.9092	6.898	7.20618	6.91985	14	14	14	13	13	15	5	6	7	55.725
+	TGVEG_242070;TGME49_242070;TGGT1_242070	cAMP-dependent protein kinase regulatory subunit	N/A	0	31.2476	31.3201	31.1044	31.0473	31.1499	31.3283	29.5637	29.4072	29.8478	3.45032	1.61778	+	+	+	+	+	+	+	+	102.46	451	53.5	10.2362	9.43583	9.47321	9.2856	9.35255	9.37409	9.47894	8.78539	8.76097	8.89028	24	25	23	23	24	25	19	19	20	42.796
+	TGVEG_245710;TGME49_245710;TGGT1_245710	phosphatidylinositol-4-phosphate 5-kinase, putative;putative phosphatidylinositol-4-phosphate 5-kinase	N/A	0	26.1722	26.1799	26.3044	25.723	25.3451	25.7434	23.922	23.6058	23.6674	4.7114	2.48707	+	+	+	+	+	+	+		25.683	43	39.2	8.61385	7.90883	7.94245	7.90816	7.62612	7.43463	7.8717	6.74351	6.6891	6.84999	6	8	8	6	6	7	4	3	4	31.258
+	TGVEG_249970;TGME49_249970;TGGT1_249970	hypothetical protein	N/A	0	28.9538	28.9438	28.5669	28.5835	28.8447	29.5302	27.8566	27.7231	28.5004	1.36657	0.794783	+	+	+	+	+		+	+	90.132	106	52.4	9.57307	8.7646	8.76597	8.54916	8.59934	8.63035	8.86508	8.13004	8.20183	8.56949	8	8	8	10	10	9	5	6	8	24.712
+	TGVEG_260820;TGME49_260820;TGGT1_260820	IMC sub-compartment protein ISP1	N/A	0	29.1672	28.7513	28.6711	28.6195	29.1266	29.5563	26.2279	26.9907	27.7936	1.75357	1.8591	+	+	+	+	+		+	+	80.035	204	58.5	9.55039	8.78238	8.72516	8.65774	8.58798	8.66905	8.92374	7.71884	7.86814	8.14786	11	11	10	11	11	11	7	8	9	19.413
+	TGVEG_261440;TGME49_261440;TGGT1_261440	ARM repeats containing protein	N/A	0	29.2531	29.173	29.3536	29.3277	29.6407	29.3881	28.7977	28.6625	28.4909	2.38916	0.609526	+	+	+	+	+	+	+	+	183.29	189	46.4	9.71579	8.84001	8.85606	8.7834	8.80391	8.79569	8.97204	8.48701	8.52434	8.53161	10	11	11	13	10	13	10	11	11	30.509
+	TGGT1_262450;TGVEG_262450;TGME49_262450	dyggve-melchior-clausen syndrome protein;hypothetical protein	N/A	0	24.3095	24.0377	23.9274	24.1083	24.631	24.3676	22.0538	21.0245	20.1075	2.21047	3.02958	+				+				166.91	87	20.2	8.07925	7.45962	7.32087	7.18466	7.17915	7.2136	7.29616	6.29894	6.04836	5.79823	17	13	12	14	14	15	4	3	3	176.29
+	TGVEG_264990;TGME49_264990;TGGT1_264990	hypothetical protein	N/A	0	27.4266	27.6787	27.842	27.7962	27.7672	27.6796	26.8352	26.444	26.4512	2.42711	1.07232	+	+	+	+	+				28.133	140	49	9.22814	8.32662	8.45814	8.35164	8.42395	8.3801	8.4658	7.80645	7.78209	7.65048	11	10	10	11	11	11	6	6	5	29.069
+	TGGT1_277870;TGVEG_277870;TGME49_277870	hypothetical protein	N/A	0	25.9506	25.7543	25.9148	25.8635	26.0596	26.211	24.736	24.5008	24.6171	3.79879	1.25524	+	+		+	+				93.663	97	57.6	8.64914	7.75643	7.77346	7.68711	7.79003	7.82171	8.06733	6.99385	7.0125	7.1989	14	12	11	12	15	16	5	4	5	58.033
+	TGVEG_293470;TGME49_293470;TGGT1_293470	hypothetical protein;immune mapped protein 1	N/A	0	28.401	28.4293	28.5437	28.3708	28.4886	28.3757	27.2794	26.8833	26.8509	3.26015	1.45346	+	+	+	+	+		+		165.25	194	70.8	9.38191	8.57285	8.59204	8.49445	8.55218	8.51545	8.62931	7.86399	7.82142	7.91765	19	20	18	21	21	21	12	10	14	43.492
+	TGVEG_301440;TGME49_301440;TGGT1_301440	calcium-dependent protein kinase CDPK1	N/A	0	31.011	31.0931	31.0165	31.0424	31.0925	31.3313	29.9644	29.7717	29.9241	4.24382	1.15347	+	+	+	+	+		+		146.58	439	56.4	10.2129	9.28601	9.43119	9.32052	9.35486	9.31006	9.47829	8.87402	8.81182	8.95036	28	29	27	27	26	28	20	21	23	65.421
+	TGGT1_310930;TGVEG_310930;TGME49_310930	hypothetical protein	N/A	0	25.1474	25.2891	25.258	25.2368	25.3026	25.2395	24.5537	24.1671	24.1897	2.66088	0.928008	+	+	+		+				35.366	109	26.7	8.47936	7.67935	7.69164	7.64295	7.59053	7.51851	7.66032	7.08941	7.12743	7.23697	12	11	11	9	8	12	7	6	8	87.519
+	TGGT1_313290;TGVEG_313290;TGME49_313290	MORN repeat-containing protein	N/A	0	28.4665	28.461	28.5875	28.5344	28.3728	28.7835	27.8194	27.5889	27.7216	3.27128	0.794989	+	+	+	+	+				284.76	256	65	9.46486	8.63802	8.64581	8.5068	8.56919	8.47627	8.79169	8.06412	8.0707	8.29115	20	22	21	21	21	23	16	16	21	46.04
+	TGVEG_316540;TGME49_316540;TGGT1_316540	IMC sub-compartment protein ISP3	N/A	0	29.1487	29.137	28.7836	28.6104	28.6867	28.6983	26.2491	26.1121	26.7546	3.49642	2.65116	+	+	+	+	+	+	+	+	26.898	166	53	9.5307	8.87023	8.84748	8.70452	8.53098	8.56499	8.67777	7.78613	7.81382	8.12274	8	8	8	6	6	6	7	7	7	18.39
+	TGVEG_203160;TGME49_203160;TGGT1_203160	hypothetical protein	N/A	0	24.5553	24.7378	24.6856	24.674	24.7998	24.8529	23.1132	22.9879	23.2781	3.97552	1.53317	+	+		+					46.326	54	24.5	8.26347	7.33377	7.4553	7.36288	7.49226	7.3542	7.63385	6.54816	6.62376	6.76571	8	9	8	10	8	8	5	5	4	74.801
+	TGVEG_209450;TGME49_209450;TGGT1_209450	TLD protein	N/A	0	25.9265	25.9135	25.9973	25.093	25.194	25.3947	21.7572	21.1727	22.1893	3.86149	4.23937	+	+		+					76.802	94	30.7	8.49217	7.83375	7.86287	7.76521	7.55379	7.39623	7.65198	6.25044	6.14805	6.39324	18	17	17	12	11	15	2	2	3	92.271
+	TGME49_211630;TGGT1_211630;TGVEG_211630	hypothetical protein	N/A	0	26.6139	26.6547	26.7562	26.5472	26.8984	26.7287	24.8723	24.5118	24.781	4.13425	1.95323	+	+	+	+		+			62.167	84	66.2	8.84709	8.00458	8.07052	7.96054	7.98132	8.04638	8.15951	7.03957	7.10707	7.25592	9	9	9	10	10	11	3	4	6	23.612
+	TGVEG_214575;TGME49_214575;TGGT1_214575	hypothetical protein	N/A	0	27.894	28.0184	28.2037	27.9345	27.8991	28.4772	26.6287	26.8735	27.3534	2.03225	1.08686	+	+	+	+					38.544	74	58.7	9.30681	8.45675	8.45117	8.52869	8.41719	8.30196	8.57245	7.86873	7.91476	8.10944	4	4	4	4	4	5	4	3	4	10.282
+	TGGT1_220320;TGVEG_220320;TGME49_220320	BSD domain-containing protein	N/A	0	25.1638	24.9847	25.3306	24.3491	24.6708	24.2631	22.4152	21.8075	21.7832	3.79061	3.15773	+								54.163	51	42	8.26183	7.56587	7.62263	7.5238	7.29938	7.34447	7.36693	6.23626	6.22526	6.27625	7	8	8	6	7	8	2	2	2	34.237
+	TGGT1_222960;TGVEG_222960;TGME49_222960	SCY kinase-related protein (incomplete catalytic triad)	N/A	0	24.5402	24.4216	24.3075	23.7992	24.8137	24.4833	21.1379	20.6708	21.2999	4.14532	3.38689	+								81.275	60	22.4	8.1249	7.36209	7.45413	7.2413	7.22378	7.35299	7.3388	6.03354	5.95064	6.12985	10	11	9	10	12	10	2	2	3	112.77
+	TGVEG_226250;TGME49_226250;TGGT1_226250	DEAD (Asp-Glu-Ala-Asp) box polypeptide DDX3X	N/A	0	25.3166	25.6078	25.4907	24.9087	25.083	24.8611	24.4539	24.5348	24.1095	2.68519	1.10562									82.757	120	46.7	8.45749	7.7148	7.84233	7.69494	7.36228	7.22024	7.52865	7.07813	7.23634	7.11975	19	18	18	11	10	13	10	11	11	78.592
+	TGVEG_226700;TGGT1_226700;TGME49_226700	nuclease, putative;putative nuclease	N/A	0	23.8238	23.9281	24.1794	23.8134	24.2507	23.9928	23.4166	23.2869	22.687	1.56867	0.846967	+								16.866	32	18.3	8.06959	7.1384	7.2169	7.18333	7.29234	7.32127	7.2919	6.60091	6.66676	6.49403	5	5	5	6	7	6	2	2	2	50.445
+	TGVEG_227020;TGME49_227020;TGGT1_227020	histone deacetylase SIR2	HMM: MNLLVISCCFLLTLACLF, NN: MNLLVISCCFLLTLAC	0	24.8701	24.8383	24.9775	24.5683	24.7742	24.7211	22.8775	22.7983	22.4702	4.10934	2.17994									42.23	47	33.6	8.27217	7.53495	7.50541	7.50451	7.41419	7.37774	7.49354	6.3801	6.46428	6.41611	6	6	6	7	7	7	2	2	2	40.007
+	TGGT1_233030;TGVEG_233030;TGME49_233030	gliding-associated protein GAP70	N/A	0	25.8536	25.9887	26.2779	26.0699	26.5621	26.0685	25.6126	25.2301	24.9916	1.5899	0.761982	+	+	+	+					50.647	32	11.2	8.7067	7.71554	7.79793	7.78327	7.96566	7.94407	7.85566	7.46353	7.4134	7.42339	2	3	3	4	3	2	2	2	2	38.66
+	TGGT1_235490;TGME49_235490;TGVEG_235490	high-temperature-induced dauer-formation protein;hypothetical protein	N/A	1	28.4635	28.4967	28.4177	28.2518	28.583	28.4945	26.9691	26.6064	26.8383	3.96753	1.65467	+	+	+	+					171.74	245	53.3	9.38908	8.6045	8.64733	8.5023	8.49488	8.54443	8.61715	7.77582	7.82162	7.91596	32	30	29	30	33	32	17	19	19	102.12
+	TGVEG_237820;TGME49_237820;TGGT1_237820	IMC sub-compartment protein ISP2	N/A	0	28.7858	28.7842	28.9424	28.5893	28.8093	28.6149	26.9676	26.8176	26.5818	4.10497	2.04844	+	+	+	+			+	+	94.348	128	74.4	9.49463	8.61983	8.83896	8.61217	8.59105	8.53071	8.77846	7.89213	8.01456	7.98171	8	8	9	8	8	9	7	8	8	17.397
+	TGVEG_242380;TGME49_242380;TGGT1_242380	fatty acid elongase	N/A	7	19.5307	19.4587	NaN	18.9191	19.4966	20.6175	18.4614	18.8918	NaN	1.19167	0.81811									11.765	10	14.9	6.75865	5.94755	5.89728	NaN	5.4206	5.87696	6.26602	5.1896	5.46355	5.8772	3	3	0	2	3	3	2	2	1	39.594
+	TGGT1_242570;TGVEG_242570;TGME49_242570	hypothetical protein	N/A	0	28.5789	28.5979	28.7157	28.4904	28.7779	28.5996	27.2245	26.8998	26.9255	3.86053	1.61424	+	+	+	+					323.31	360	64	9.45703	8.64491	8.67677	8.59631	8.60995	8.60781	8.72132	7.89521	7.84241	7.81906	33	33	30	33	34	35	25	26	26	94.837
+	TGGT1_247690;TGVEG_247690;TGME49_247690	phospholipid-translocating P-type ATPase, flippase subfamily protein	N/A	8	23.7288	23.8188	23.9789	23.6648	23.8884	24.0906	22.596	22.0962	22.5345	2.93092	1.43329	+								61.573	64	14.2	8.00488	7.14167	7.20011	7.10493	7.23623	7.20674	7.28194	6.29495	6.19092	6.43107	12	11	10	12	10	11	6	3	4	204.95
+	TGVEG_255910;TGME49_255910;TGGT1_255910	PfMNL-2 CISD1 family iron-sulfur protein, putative;putative PfMNL-2 CISD1 family iron-sulfur protein	HMM: MDELLQMLVVFLRAR, NN: MDELLQMLVVFLRARVPSTFRAR;HMM: MHDLLQMLVVFLRAR, NN: MHDLLQMLVVFLRARVPSTFRAR	0	25.9077	26.0193	26.2921	26.2128	26.4134	26.1862	25.3413	25.1292	25.2099	2.54369	0.846228									13.986	67	46.8	8.73959	7.88661	7.94738	7.85144	7.86431	7.87838	7.92662	7.38943	7.41556	7.45691	6	6	6	5	6	6	4	4	4	24.955
+	TGGT1_261500;TGVEG_261500;TGME49_261500	hydrolase	N/A	0	27.9344	27.9025	28.0831	27.432	27.6976	27.3135	25.5103	25.2011	25.2051	4.66585	2.66787	+	+	+	+					92.552	129	49.5	9.15433	8.49903	8.39464	8.41149	8.20249	8.22409	8.33181	7.3175	7.2933	7.36388	14	12	13	12	13	14	7	6	7	53.149
+	TGVEG_261780;TGME49_261780;TGGT1_261780	microneme protein MIC7	N/A	1	28.4775	28.4909	28.7048	27.2676	27.2502	27.274	25.2914	25.1519	25.0101	5.19445	3.40657	+	+	+	+					128.68	141	56.2	9.24107	8.69916	8.58598	8.6492	8.07423	7.99271	8.14217	7.18096	7.2442	7.34596	15	14	13	13	10	11	5	6	5	36.34
+	TGVEG_261980;TGGT1_261980;TGME49_261980	gorasp2-prov protein	N/A	0	25.1695	25.097	25.0426	25.1084	25.3501	25.4264	23.7594	23.661	23.8138	4.70835	1.35831	+	+		+				+	180.66	70	40	8.41424	7.61165	7.62115	7.52563	7.5537	7.50748	7.69231	6.68529	7.01351	7.04021	7	8	7	6	7	9	2	5	4	50.485
+	TGVEG_262860;TGGT1_262860;TGME49_262860	ADP-ribosylation factor family protein 1, putative;putative ADP-ribosylation factor family protein 1	N/A	0	23.1229	23.1512	22.9687	21.1393	21.6524	22.2269	21.4203	21.198	21.8567	2.85381	1.58931	+								7.4086	27	24.4	7.67919	6.99851	7.05419	6.88081	6.61716	6.61576	6.78183	6.25825	5.99228	6.24652	3	3	3	3	3	2	3	2	2	20.176
+	TGVEG_266120;TGME49_266120;TGGT1_266120	thioredoxin-dependent peroxidase TPX1/2	HMM: MLPLCASSQMYLGQECLSCPVLPRLCLATCLGA, NN: MLPLCASSQMYLGQECLSCPVLPRLCLAT	0	27.1779	27.0418	27.0394	26.9987	27.0996	27.3859	24.8503	24.963	25.1365	4.6083	2.10306									41.154	88	48.3	8.99172	8.25421	8.23497	8.17102	8.10404	8.03615	8.29148	7.16173	7.22902	7.27098	10	11	10	12	9	12	8	7	6	37.184
+	TGVEG_267080;TGGT1_267080;TGME49_267080	26S protease regulatory subunit 4, putative;putative 26S protease regulatory subunit 4	N/A	0	29.8884	29.8442	29.9285	29.9134	30.2185	30.0405	28.3186	28.1705	28.3865	4.70145	1.59515	+	+	+	+				+	158.33	318	65.8	9.85737	8.99768	9.02735	8.94778	9.05591	9.02268	9.1372	8.30752	8.30088	8.4604	27	25	25	26	27	27	18	19	23	49.134
+	TGGT1_267100;TGME49_267100;TGVEG_267100	protein phosphatase 2C domain-containing protein	N/A	0	26.4701	26.5	26.7176	26.5802	26.6779	26.4855	25.7346	25.1478	25.0255	2.25133	1.25997	+	+	+	+				+	174.11	150	43.7	8.83145	7.97803	8.00711	7.94151	8.25302	7.95359	7.9558	7.15302	7.0571	6.97035	19	20	19	23	22	18	9	9	8	96.722
+	TGME49_267280;TGGT1_267280;TGVEG_267280	hypothetical protein	N/A	0	22.6327	22.6209	22.6135	22.7776	22.9676	22.7085	NaN	21.8321	21.6938	3.31498	0.859418	+								20.669	37	15.4	7.66151	6.75292	6.87679	6.77888	6.87307	6.8312	6.93853	5.48224	6.23444	6.23606	5	7	5	7	6	8	1	2	2	110.09
+	TGVEG_267440;TGME49_267440;TGGT1_267440	RING zinc finger protein	N/A	0	25.9042	25.8956	26.1899	26.0599	26.1898	25.9372	25.4547	25.3643	25.288	2.35962	0.627593	+	+		+				+	29.173	61	28.6	8.71453	7.82831	7.80117	7.73911	7.93607	7.66936	7.99172	7.46632	7.59164	7.52304	7	7	5	8	7	8	7	7	6	41.492
+	TGGT1_269990;TGVEG_269990;TGME49_269990	hypothetical protein	N/A	0	24.9213	24.8767	24.7803	24.8305	25.2482	25.0757	24.0134	23.4887	23.7805	2.65449	1.09857	+	+		+					64.379	89	16.3	8.34682	7.43642	7.50848	7.41546	7.56324	7.5908	7.66965	6.62318	6.60198	6.78936	13	12	12	16	16	17	6	6	5	216.02
+	TGGT1_271380;TGVEG_271380;TGME49_271380	PUB domain-containing protein	N/A	0	25.3694	25.4975	25.4356	25.3595	25.4882	25.648	24.5324	24.5577	24.8615	2.65818	0.783642	+	+		+					154.6	131	33	8.51793	7.61023	7.70247	7.62132	7.65485	7.56575	7.82701	7.19786	7.09681	7.28357	17	18	17	17	17	18	10	10	11	107.59
+	TGVEG_276140;TGGT1_276140;TGME49_276140	ADP ribosylation factor ARF1	N/A	0	30.3932	30.3101	30.1652	29.9386	30.2908	30.9095	28.2247	28.3414	28.5331	4.17245	1.92308	+	+	+	+			+	+	49.206	148	66.7	9.96398	9.24199	9.0721	9.16486	9.14464	9.14358	9.06277	8.38694	8.45003	8.54122	9	8	9	9	9	8	5	6	7	21.062
+	TGGT1_285190;TGVEG_285190;TGME49_285190	zinc finger, C3HC4 type (RING finger) domain-containing protein	N/A	0	26.371	26.3478	26.537	26.4193	26.6628	26.2466	25.4835	24.9693	25.0226	2.71674	1.26015	+	+	+	+					82.828	88	22.1	8.78517	8.02547	8.04575	7.97058	7.91054	7.91208	7.95758	7.28344	7.01845	7.19838	11	11	11	11	10	10	6	5	6	69.997
+	TGME49_290200;TGGT1_290200;TGVEG_290200	NAD/NADP octopine/nopaline dehydrogenase, alpha-helical domain-containing protein	HMM: MGAPSPVAAGVAARTKSPLLTVCVCGGGNSAHAVAA, NN: MGAPSPVAAGVAARTKSPLLTV	0	24.6346	24.5882	24.5411	24.2409	24.2307	23.9389	23.9029	24.0536	23.8749	3.3228	0.644183	+	+		+			+		28.666	64	39.8	8.21588	7.46525	7.51553	7.30696	7.16625	7.21016	7.34246	6.92334	7.02354	7.0136	9	10	9	7	8	10	6	6	7	48.072
+	TGGT1_292120;TGVEG_292120;TGME49_292120	membrane occupation and recognition nexus protein MORN2	N/A	0	27.8238	27.7468	27.9978	27.7099	27.6943	27.9174	26.6384	26.4877	26.5524	3.94537	1.29665	+	+	+	+			+		110.48	207	60	9.23127	8.4631	8.40724	8.40956	8.36836	8.33518	8.40956	7.72178	7.8129	7.88199	16	15	16	16	16	16	9	10	10	49.281
+	TGVEG_293820;TGME49_293820;TGGT1_293820	calpain family cysteine protease domain-containing protein	HMM: MKGFASSFSLLPPTFPVSSAS, NN: MKGFASSFSLLPPTFPVSSAS	0	23.8452	23.7932	23.929	23.798	23.8984	23.5335	23.4265	23.0823	22.8092	1.82785	0.74981									26.498	52	6.6	8.02011	7.15375	7.18746	7.10701	7.25878	7.0816	7.22557	6.76227	6.77844	6.54266	4	5	6	7	8	6	5	5	4	243.93
+	TGME49_306660;TGGT1_306660;TGVEG_306660	RNA pseudouridine synthase superfamily protein	N/A	0	24.365	24.4746	24.306	24.3102	24.7376	24.4784	22.564	22.7813	22.531	4.33931	1.75644	+								53.727	54	4.4	8.17155	7.47044	7.41976	7.38169	7.23729	7.24981	7.43578	6.20232	6.37566	6.3493	11	10	11	7	6	8	3	4	4	676.32
+	TGGT1_309265;TGVEG_309265;TGME49_309265	oxidoreductase, short chain dehydrogenase/reductase family protein	N/A	1;2	27.9042	27.7624	27.4072	27.2454	27.6264	27.6685	25.2734	25.3002	25.7013	3.44032	2.26629									106.72	197	32.5	9.12169	8.38184	8.38112	8.23952	8.21911	8.19008	8.45113	7.21906	7.35915	7.41263	19	17	16	17	18	21	8	9	9	99.225
+	TGVEG_313380;TGME49_313380;TGGT1_313380	hypothetical protein	N/A	0	32.0295	32.0708	32.4011	31.9285	31.6551	32.2414	30.5298	30.255	30.389	3.63023	1.77587	+	+	+	+		+	+	+	323.31	519	81.4	10.4816	9.70603	9.71713	9.72899	9.56807	9.44331	9.74509	8.92527	8.9526	8.94628	19	19	19	21	20	21	17	16	16	31.512
+	TGVEG_320760;TGME49_320760;TGGT1_320760	hypothetical protein	N/A	0	26.4699	26.5539	26.7749	26.4168	26.4914	26.4318	24.8396	24.4658	24.3299	3.49763	2.05449	+	+	+	+					53.356	103	38.9	8.78734	8.02804	8.05127	8.04112	7.93727	7.88427	7.98359	6.89756	6.87097	6.95025	14	13	13	12	12	12	6	5	6	39.389
+	TGME49_207460;TGVEG_207460B;TGGT1_207460B	Rab5B protein	N/A	0	26.6751	26.7869	26.7547	26.6373	26.7852	26.7299	25.5107	25.0312	25.0186	3.14385	1.55204	+	+		+				+	106.46	99	61.4	8.91403	8.14048	8.19276	8.02617	8.09384	7.9714	8.16056	7.37641	7.24726	7.2093	12	11	11	10	8	11	8	5	4	24.677
+	TGME49_297150;TGVEG_297150;TGGT1_297150	MORN repeat-containing protein	N/A	0	24.9469	25.1377	25.3793	24.936	25.1257	25.0106	24.5439	24.1002	24.0712	2.01038	0.916169	+	+	+	+		+	+		19.882	49	26	8.39973	7.52696	7.59137	7.58476	7.545	7.56205	7.59912	6.97297	6.9433	7.01941	8	7	8	10	10	7	4	5	5	50.394
+	TGVEG_299970;TGME49_299970;TGGT1_299970	tetratricopeptide repeat-containing protein	N/A	0	27.3447	27.2486	27.2959	27.2923	27.4601	27.4439	26.5351	26.3607	26.5605	3.53143	0.81096	+	+		+				+	118.51	184	68.3	9.09426	8.25813	8.22363	8.14417	8.18512	8.19304	8.35033	7.80935	7.84358	7.94005	16	15	15	16	17	18	15	16	15	46.498
	TGME49_212210;TGGT1_212210;TGVEG_212210	hypothetical protein	N/A	0	23.913	23.366	23.3923	23.3943	23.3165	23.6541	NaN	NaN	NaN	0	NaN	+	+	+		+				34.287	35	53.9	7.85905	7.25195	7.1518	6.92748	7.01271	6.70007	7.17632	5.443	5.71228	5.82336	4	5	3	3	3	5	1	1	1	28.897
	TGVEG_219710;TGGT1_219710	hypothetical protein	N/A	0	26.5961	26.51	26.5311	25.2596	25.6684	25.4638	NaN	NaN	NaN	0	NaN	+	+		+	+				310.9	127	33.8	8.62135	8.12516	8.06172	7.94831	7.43952	7.39354	7.45436	NaN	NaN	NaN	34	34	32	14	14	14	1	0	0	199.78
	TGGT1_232340;TGME49_232340;TGVEG_232340	protein phosphatase 2C domain-containing protein	N/A	0	30.3396	30.3578	30.5271	30.4251	30.605	30.3199	30.1432	29.8234	29.8158	1.75534	0.480698	+	+	+	+	+			+	179.83	317	53.9	10.0386	9.10401	9.23419	9.11992	9.13532	9.12882	9.2036	8.81359	8.90852	8.93225	25	27	24	27	25	25	24	25	23	60.027
	TGVEG_240550;TGME49_240550;TGGT1_240550	copper chaperone COX17-1, putative;putative copper chaperone COX17-1	N/A	0	23.3859	23.4017	23.5797	NaN	NaN	NaN	NaN	NaN	NaN	0	NaN	+	+	+	+	+			+	3.6271	10	28.6	7.61065	7.06081	7.06348	7.01174	6.40324	6.36397	6.41589	NaN	NaN	NaN	2	2	2	1	1	1	0	0	0	8.1951
	TGGT1_243800;TGVEG_243800;TGME49_243800	long-chain fatty acid CoA ligase, putative;putative long-chain fatty acid CoA ligase	N/A	0	30.6692	30.7105	30.8419	30.7029	31.0163	30.7531	30.6419	30.3002	30.3708	1.22198	0.302904	+	+	+	+	+				323.31	663	66.9	10.1792	9.27999	9.3179	9.2408	9.25157	9.24628	9.38509	9.02715	9.02567	9.10829	35	36	37	36	35	36	35	36	37	83.507
	TGVEG_255245;TGME49_255245;TGGT1_255245	hypothetical protein;putative transmembrane protein	HMM: MGNLLSSLLPPRVHKRLNRLWTNSYWLVSTVAWVASTAAITLAA, NN: MGNLLSSLLPPRVHKRLNRLWTNSYWLVSTVAWVASTAAITLAA	2	NaN	NaN	20.8856	NaN	NaN	NaN	NaN	NaN	NaN	0	NaN	+				+				8.0349	4	41.6	7.15782	6.31249	6.28708	6.20868	6.39623	6.43201	6.55398	NaN	NaN	NaN	1	1	1	1	1	1	0	0	0	9.5779
	TGGT1_262390;TGVEG_262390;TGME49_262390	TLD protein	N/A	0	24.4198	24.4191	24.5862	24.3055	24.4346	24.2381	NaN	NaN	NaN	0	NaN	+	+	+	+	+				17.173	34	9.4	8.11618	7.39155	7.43189	7.36421	7.21434	7.19299	7.3327	5.9324	5.93122	5.82745	9	9	9	7	6	7	1	1	1	148.06
	TGGT1_262490;TGVEG_262490;TGME49_262490	alpha/beta hydrolase, putative;putative alpha/beta hydrolase	N/A	0	26.9048	26.9458	27.0153	27.1589	27.2954	26.9428	26.747	26.7936	26.8599	1.55395	0.15512	+	+		+	+			+	57.801	98	33.1	9.04317	8.09694	8.18441	8.02938	8.19651	8.1231	8.15851	7.87587	7.93298	8.09604	7	8	8	8	8	8	8	7	8	29.068
	TGVEG_265270;TGGT1_265270;TGME49_265270	hypothetical protein	N/A	0	23.7781	23.8665	24.0564	23.6503	24.202	23.4151	NaN	NaN	NaN	0	NaN	+	+	+		+				16.953	31	17.2	7.94733	7.17537	7.20317	7.17129	7.06648	7.15128	7.13351	5.78516	6.19951	6.07602	4	4	4	4	4	4	1	1	1	38.43
	TGVEG_289615;TGGT1_289615	hypothetical protein	N/A	0	24.4404	24.4798	24.6969	24.7294	24.9058	24.5834	24.3549	23.9434	23.9241	1.34542	0.464883	+	+	+		+				33.639	38	38.3	8.27397	7.29334	7.4459	7.39035	7.35795	7.42513	7.40126	7.14765	7.06254	7.19265	4	5	5	4	5	4	5	4	5	23.085
	TGVEG_305860;TGME49_305860;TGGT1_305860	calcium-dependent protein kinase CDPK3	N/A	0	30.4396	30.528	30.6077	30.6215	30.742	30.688	30.473	30.2694	30.3363	1.00683	0.165517	+	+	+	+	+		+	+	211.59	509	65.5	10.1137	9.16071	9.21418	9.16414	9.21937	9.198	9.32887	8.93736	8.93361	9.13245	34	35	33	35	36	34	36	33	36	60.429
	TGVEG_309990;TGME49_309990;TGGT1_309990	hypothetical protein;putative transmembrane protein	HMM: MGNMCAICFNPGKAASCSCFNLAVAVLLFAVYYGLVGGM, NN: MGNMCAICFNPGKAASCSCFNLAVAVLLFAVYYGLVGGM	4	26.2022	25.6897	26.5756	25.38	NaN	NaN	NaN	NaN	NaN	0	NaN	+	+			+				3.4533	13	10	8.48612	7.89285	7.74603	7.92544	7.61068	7.18977	7.28937	6.68585	6.5546	6.60278	2	2	2	2	2	1	1	1	1	20.583
	TGVEG_310420;TGME49_310420;TGGT1_310420	hypothetical protein	N/A	0	28.4054	28.3933	28.6168	28.3874	28.8364	28.5527	28.0909	28.2445	28.1749	1.62209	0.301701	+	+	+	+	+	+			15.254	26	41.4	9.46313	8.55816	8.56396	8.56282	8.52897	8.59024	8.65705	8.23106	8.29488	8.41958	1	2	2	1	2	2	2	2	2	22.925
	TGVEG_319510;TGME49_319510;TGGT1_319510	hypothetical protein	N/A	0	27.0302	27.0551	27.1272	26.9638	27.2891	27.0784	27.1953	26.8911	26.6757	0.416387	0.150138	+	+	+	+	+				70.517	105	63	9.05262	8.10264	8.20008	8.17487	8.12914	8.0434	8.30129	7.83746	7.88761	8.01216	8	10	10	9	8	10	7	7	8	29.924
	TGVEG_200320;TGME49_200320;TGGT1_200320	hypoxanthine-xanthine-guanine phosphoribosyl transferase HXGPRT	N/A	0	22.8432	22.9221	22.8718	22.7212	22.9337	23.0315	23.1765	23.2339	23.0196	1.74942	-0.264304									13.875	27	15.8	7.81287	6.77379	6.81035	6.6902	6.85713	6.84659	7.04368	6.79326	6.89846	6.91834	3	3	2	2	2	2	2	2	3	31.485
	TGVEG_200360;TGGT1_200360	hypothetical protein	HMM: MMLIALVCMLVHRLDLGAAV, NN: MMLIALVCMLVHRLDLGAAV	0	NaN	NaN	18.4013	NaN	NaN	NaN	NaN	NaN	NaN	0	NaN									3.0249	7	7	6.63622	5.6334	5.89205	5.46082	5.6542	5.67598	5.79904	5.51208	5.66308	5.68861	1	1	1	1	1	1	1	1	1	20.245
	TGVEG_201400;TGGT1_201400;TGME49_201400	Sin3-associated polypeptide SAP18	N/A	0	21.2286	21.3841	21.3657	21.3624	NaN	NaN	21.2603	21.4597	21.1748	0.102764	0.0278893									10.24	16	9.8	7.25312	6.50065	6.67806	6.35807	6.19346	5.77932	5.90069	6.15558	6.16864	6.26366	4	4	4	2	1	2	3	2	3	97.246
	TGGT1_201680;TGVEG_201680;TGME49_201680	eukaryotic initiation factor-3 subunit 10, putative;putative eukaryotic initiation factor-3 subunit 10	N/A	0	24.5926	24.6035	24.6626	24.6936	24.8024	24.3359	24.8129	24.7557	24.5809	0.592772	-0.0969372									34.978	86	24.3	8.3242	7.22663	7.48593	7.43626	7.48029	7.34455	7.46109	7.13628	7.28731	7.34007	13	14	14	15	13	14	11	12	11	118.85
	TGVEG_201700;TGME49_201700;TGGT1_201700	WD domain, G-beta repeat-containing protein	N/A	0	21.4654	21.5619	21.6553	NaN	NaN	NaN	NaN	NaN	NaN	0	NaN									7.2549	15	7.5	7.25657	6.42975	6.52293	6.46593	6.16741	6.03655	6.10816	5.99937	6.49236	6.06457	3	3	3	1	1	1	2	2	2	67.411
	TGVEG_201780;TGME49_201780;TGGT1_201780	microneme protein MIC2	HMM: MRLQREAVFGLMFACGMWMWPSEVAGG, NN: MRLQREAVFGLMFACGMWMWPSEVAGG	1	23.1827	23.0011	23.1642	23.0988	NaN	NaN	NaN	23.3206	22.8296	0.0710325	0.0409387									15.422	21	15.2	7.73747	6.96806	6.91546	6.74022	6.65502	NaN	6.60761	6.33159	7.12447	6.87962	5	5	5	3	1	1	1	4	4	82.619
	TGVEG_202200;TGGT1_202200;TGME49_202200	hypothetical protein	N/A	0	23.7147	24.0495	24.1837	24.2777	24.064	24.2587	24.5954	24.0932	24.3997	0.876204	-0.38013									44.869	75	23	8.17632	7.13659	7.18512	7.2315	7.2108	7.11521	7.35272	7.26243	7.12882	7.31099	10	10	9	9	8	9	11	8	11	87.161
	TGVEG_202370;TGME49_202370;TGGT1_202370	putative T-complex protein 1, epsilon subunit (TCP-1-epsilon);T-complex protein 1, epsilon subunit (TCP-1-epsilon), putative	N/A	0	22.6551	22.6454	22.7122	22.8801	22.3615	22.2875	22.7012	22.6671	22.6791	0.192001	-0.0115795									19.18	38	30.4	7.70991	6.86092	6.85486	6.50036	6.91639	6.44977	6.57769	6.68291	6.7709	6.90985	4	5	4	5	3	5	5	5	8	58.631
	TGVEG_202380;TGME49_202380;TGGT1_202380	putative rab GDI alpha;rab GDI alpha, putative	N/A	0	NaN	20.7812	20.9523	NaN	NaN	NaN	20.8408	20.9616	20.8519	0.0768864	-0.0180438									7.2103	14	13.4	7.12398	6.12529	6.29319	6.22565	6.06224	5.91844	6.29572	6.06677	6.1967	6.2112	1	2	2	2	1	3	2	2	2	51.021
	TGVEG_202500;TGME49_202500;TGGT1_202500	GAPM1a	N/A	6	23.7361	24.0806	23.7881	23.6844	23.6552	23.7024	22.5891	23.4016	24.0735	0.508327	0.513528									17.534	31	26.6	8.23515	7.30484	7.34883	7.2909	7.29846	7.15048	7.46951	6.8808	7.16119	7.38399	2	2	2	3	3	5	2	2	3	33.534
	TGVEG_202510;TGME49_202510;TGGT1_202510	multi-pass transmembrane protein	N/A	6	NaN	NaN	NaN	NaN	NaN	NaN	NaN	NaN	21.0966	0	NaN									1.3956	1	5.2	6.29462	NaN	NaN	NaN	NaN	NaN	NaN	NaN	NaN	6.29462	0	0	0	0	0	0	0	0	1	33.65
	TGVEG_202530;TGME49_202530;TGGT1_202530	aspartate-tRNA ligase	N/A	1	NaN	NaN	NaN	20.9628	NaN	NaN	NaN	NaN	NaN	0	NaN									3.4531	5	7.1	6.65105	5.75705	5.93972	5.7137	6.27648	5.45452	5.53614	NaN	NaN	NaN	2	2	1	2	1	1	0	1	0	86.762
	TGVEG_202680;TGME49_202680;TGGT1_202680	peptidase M16, alpha subunit, putative;putative peptidase M16, alpha subunit	HMM: MNASILFRRNAPGVSTCLRRRCLRPAALAAASASGVSTPASGV, NN: MNASILFRRNAPGVSTCLRRRCLRPAALA	0	23.9531	23.8199	23.9	24.1745	23.8837	23.9377	23.8264	24.0154	23.5079	0.283842	0.10778									14.359	41	18.5	8.10445	7.16791	7.28133	7.15464	7.25833	7.09286	7.24413	6.9216	7.05304	7.05607	6	6	5	6	6	6	5	5	4	62.161
	TGVEG_202770;TGME49_202770;TGGT1_202770	RNA recognition motif-containing protein	N/A	0	NaN	19.7861	NaN	NaN	NaN	NaN	NaN	NaN	NaN	0	NaN									2.0655	7	2.3	6.93633	6.11594	5.98761	NaN	6.03874	6.01098	6.21638	5.88962	5.96337	5.95377	1	1	0	1	1	1	1	1	1	55.868
	TGGT1_202950	hypothetical protein	N/A	0	NaN	NaN	NaN	NaN	NaN	NaN	NaN	NaN	18.1613	0	NaN									2.1748	1	1.6	5.411	NaN	NaN	NaN	NaN	NaN	NaN	NaN	NaN	5.411	0	0	0	0	0	0	0	0	1	151.89
	TGGT1_202960;TGME49_202960;TGVEG_202960	glycine cleavage H-protein	N/A	0	24.2895	24.4237	24.5207	24.4186	24.8194	24.3442	25.11	24.9939	24.7673	1.97007	-0.545741									38.858	49	27.1	8.31612	7.20575	7.32629	7.00877	7.40073	7.20426	7.44616	7.45269	7.51545	7.46807	3	4	2	5	3	5	6	6	7	32.469
	TGGT1_202980	hypothetical protein	N/A	0	NaN	NaN	18.856	NaN	NaN	NaN	NaN	NaN	NaN	0	NaN	+								1.8357	3	0.9	7.12766	NaN	NaN	5.59771	NaN	NaN	NaN	6.66541	NaN	6.9239	0	0	1	0	0	0	1	0	1	210.7
	TGVEG_203240;TGME49_203240;TGGT1_203240	hypothetical protein;putative transmembrane protein	N/A	3	NaN	NaN	16.7324	NaN	NaN	NaN	NaN	NaN	NaN	0	NaN									4.228	2	5.5	6.29327	5.25532	5.29126	4.95844	NaN	NaN	NaN	5.82334	5.92029	NaN	1	1	1	0	0	0	1	1	0	80.304
	TGGT1_203310;TGME49_203310;TGVEG_203310	dense granule protein GRA7	HMM: MARHAIFFALCVLGLVAAALPQFATAA, NN: MARHAIFFALCVLGLVAAALPQFATAA;HMM: MARHAIFSALCVLGLVAAALPQFATAA, NN: MARHAIFSALCVLGLVAAALPQFATAA	2	25.149	25.8113	25.6501	25.4734	25.3883	24.9612	25.6699	25.5407	25.0051	0.175078	0.13157									122.32	81	55.1	8.56394	7.57707	7.92756	7.81096	7.62996	7.47883	7.52094	7.31652	7.48923	7.3375	8	9	9	8	8	7	7	8	8	25.857
	TGGT1_203400;TGVEG_203400;TGME49_203400	hypothetical protein;putative transmembrane protein	HMM: MPPQLRVTFGRFFAGRKEPKALLSRQLFLAVVLAVHAS, NN: MPPQLRVTFGRFFAGRKEPKALLSRQLFLAVVLAVHAS;N/A	1;2;6	NaN	NaN	NaN	NaN	NaN	NaN	NaN	20.3466	NaN	0	NaN									3.0059	2	10.6	6.6498	5.32828	5.23295	NaN	6.10507	6.08443	5.59143	4.57045	6.00436	5.19019	1	1	0	2	2	1	1	2	1	30.044
	TGVEG_203450;TGME49_203450;TGGT1_203450	DUF3228 domain-containing protein	HMM: MAALWTTRVICFSCFFLLFVSLSAPTQGE, NN: MAALWTTRVICFSCFFLLFVSLSAPTQGE;HMM: MAALWTTRVICFSCFFLLLVSLSAPTQGE, NN: MAALWTTRVICFSCFFLLLVSLSAPTQGE	0	NaN	NaN	NaN	NaN	NaN	NaN	NaN	NaN	19.0366	0	NaN									1.7546	4	3.2	6.44877	NaN	NaN	NaN	5.66441	5.62371	5.7373	5.58267	5.72177	5.67448	0	0	0	1	1	1	1	1	1	50.587
	TGVEG_203600;TGGT1_203600;TGME49_203600	hypothetical protein;putative transmembrane protein	HMM: MILSTERMNRPGCHRASRNGGRAFFFLLLVSLSYFFLWSQ, NN: MILSTERMNRPGCHRASRNGGRAFFFLLLVSLSYFFLWSQ	1	22.7209	NaN	NaN	22.3775	22.1781	22.1588	NaN	NaN	NaN	0	NaN									6.5593	9	18.5	7.46247	6.74853	6.36228	6.00869	6.71917	6.64958	6.72244	6.21088	6.36819	6.05683	2	1	1	4	5	4	2	2	1	47.289
	TGVEG_203630;TGME49_203630;TGGT1_203630	ribosomal protein RPL44	N/A	0	25.7929	25.6067	25.8374	25.7257	25.266	25.1371	24.987	25.8898	25.3774	0.533212	0.327616									3.6066	19	27.6	8.59195	7.77037	7.75664	7.63508	7.71494	7.51231	7.54882	7.3468	7.71602	7.57515	3	3	3	2	2	2	3	2	2	12.062
	TGVEG_203700;TGME49_203700;TGGT1_203700	SFT2 family protein	HMM: MSGISSAPLLVSSVSSSQGR, NN: MSGISSAPLLVSSVSSSQGR	4	NaN	NaN	NaN	NaN	NaN	NaN	20.5318	NaN	20.0152	0	NaN									1.6316	4	5.9	6.47182	5.67094	5.46271	5.52224	NaN	NaN	NaN	5.97702	NaN	5.96534	1	1	1	0	0	0	2	0	2	29.759
	TGVEG_204020;TGME49_204020;TGGT1_204020	ribosomal protein RPL8	N/A	0	25.414	25.2229	25.2555	25.2623	25.3503	24.9654	25.6831	25.5387	25.0472	0.246642	-0.125542	+								27.198	40	20	8.56438	7.69821	7.68414	7.57758	7.59167	7.54283	7.58248	7.56446	7.65805	7.56035	4	4	4	4	4	4	4	4	4	28.254
	TGGT1_204050;TGVEG_204050;TGME49_204050	subtilisin SUB1	HMM: MGSSHAIVACAALIVLLSTNARGL, NN: MGSSHAIVACAALIVLLSTNARGL	0	24.1448	24.1649	23.9535	24.3332	24.133	24.2513	24.4235	24.3734	24.0758	0.728256	-0.203176	+								67.036	63	27.3	8.19078	7.13586	7.18698	7.07247	7.31052	7.04171	7.42182	7.08016	7.32191	7.36949	7	7	7	7	6	8	6	7	10	85.096
	TGVEG_204400;TGME49_204400;TGGT1_204400	ATPase synthase subunit alpha, putative;putative ATPase synthase subunit alpha	HMM: MTIHSCLARRAVSVAASGARAFAS, NN: MTIHSCLARRAVSVAASGARAFAS	0	23.0245	23.1443	23.0423	23.3457	22.7915	22.5862	22.9783	23.1653	22.7691	0.341943	0.0994523									7.5856	27	15.1	7.82743	6.98298	7.06629	6.64996	7.04798	6.74879	6.89488	6.75608	6.8944	6.51946	4	4	4	4	4	4	3	3	2	62.076
	TGVEG_204530;TGME49_204530;TGGT1_204530	microneme protein MIC11	HMM: MQLKKLSVVSITLLGLFKFVNGV, NN: MQLKKLSVVSITLLGLFKFVNGV	0	21.5776	21.4078	NaN	NaN	NaN	NaN	NaN	NaN	NaN	0	NaN									3.9293	7	12.7	7.18971	6.52508	6.43993	6.14085	6.2745	6.16714	6.05484	6.07254	6.1178	6.00527	2	2	1	1	1	1	1	1	1	22.432
	TGVEG_205010;TGME49_205010;TGGT1_205010	putative U2 small nuclear ribonucleoprotein family protein;U2 small nuclear ribonucleoprotein family protein, putative	N/A	0	NaN	NaN	NaN	NaN	NaN	NaN	NaN	NaN	19.6579	0	NaN									2.3783	4	3.1	6.15491	NaN	NaN	NaN	5.04914	5.23226	5.42557	4.76109	4.97688	5.86153	0	0	0	1	1	1	1	1	2	150.87
	TGGT1_205040;TGVEG_205040;TGME49_205040	PGAP1 family protein	N/A	8	23.2684	22.7776	23.0389	NaN	NaN	21.7375	NaN	NaN	NaN	0	NaN	+								37.326	22	7.6	7.51457	7.03193	6.98973	6.86684	5.88046	NaN	5.91847	5.81277	5.92473	6.23922	9	7	7	1	0	2	1	1	2	228.31
	TGVEG_205100;TGME49_205100;TGGT1_205100	hypothetical protein;putative transmembrane protein	N/A	2	NaN	NaN	17.7253	NaN	NaN	NaN	NaN	NaN	NaN	0	NaN									2.122	2	3.1	6.13274	5.40932	5.25955	5.25732	5.32936	5.39867	5.43835	NaN	NaN	NaN	1	1	1	1	1	1	0	0	0	60.167
	TGGT1_205250;TGME49_205250	rhoptry protein ROP18	HMM: MFSVQRPPLTRTVVRMGLATLLPKTACLAGLNVALVFLLFQVQDGTGI, NN: MFSVQRPPLTRTVVRMGLATLLPKTACLAGLNVALVFLLFQVQDGTGI;HMM: MFSVQRPPLTRTVVRMGLATLLPKTACLAVLNVALVFLLFQVQDGTGI, NN: MFSVQRPPLTRTVVRMGLATLLPKTACLAVLNVALVFLLFQVQDGTGI	0;1	24.5594	24.6103	24.646	24.7081	24.9062	24.4169	24.8546	24.7131	24.6514	0.965971	-0.134471									19.97	60	23.1	8.33698	7.40834	7.45864	7.33131	7.62628	7.24915	7.30737	7.24886	7.32331	7.34904	7	6	6	7	6	5	5	7	5	62.342
	TGVEG_205330;TGME49_205330;TGGT1_205330	hypothetical protein;putative transmembrane protein	N/A	8	24.528	24.4009	24.718	24.4696	24.1569	24.7605	25.0611	24.5068	24.7769	0.558775	-0.232641	+								12.849	38	18.4	8.31247	7.34461	7.34191	7.36476	7.33722	7.25681	7.5752	7.30146	7.13188	7.43329	3	4	4	6	5	6	4	4	5	35.281
	TGVEG_205340;TGME49_205340;TGGT1_205340	ribosomal protein RPS12	N/A	0	NaN	NaN	21.2479	NaN	NaN	NaN	NaN	NaN	NaN	0	NaN									2.3907	2	23.2	6.74316	NaN	NaN	6.31775	6.0849	5.76621	6.21943	NaN	NaN	NaN	0	0	2	1	1	1	0	0	0	15.399
	TGVEG_205380;TGME49_205380;TGGT1_205380	fructose-bisphospatase I	N/A	0	NaN	NaN	19.9604	NaN	NaN	NaN	NaN	NaN	NaN	0	NaN									3.1474	8	7.5	7.00826	6.03826	6.10772	5.93014	6.06644	6.01982	6.12424	6.06755	6.01381	6.0876	1	2	1	1	2	1	1	1	1	42.245
	TGVEG_205440;TGME49_205440;TGGT1_205440	CCT chaperonin gamma subunit	N/A	0	24.2478	24.1991	24.0914	24.3586	24.2484	24.0787	24.1334	24.2936	23.945	0.191559	0.0554148									24.825	84	25.5	8.1954	7.26677	7.38369	7.21237	7.35801	7.03615	7.17932	7.0596	7.31197	7.23221	8	10	9	10	8	7	10	11	11	60.697
	TGVEG_205470;TGGT1_205470;TGME49_205470	putative translation elongation factor 2 family protein;translation elongation factor 2 family protein, putative	N/A	0	28.0777	28.0739	28.0313	28.1818	27.9025	27.9742	28.2326	28.1042	28.1126	0.943915	-0.0888538									117.8	287	52	9.3827	8.46736	8.51696	8.36842	8.49454	8.33403	8.52545	8.31254	8.32418	8.44459	25	27	25	27	25	27	24	24	26	93.088
	TGVEG_205510;TGME49_205510;TGGT1_205510	nucleolar protein 5, putative;putative nucleolar protein 5	N/A	0	21.4981	21.6207	20.9496	21.4479	21.2105	21.4126	21.5417	21.5075	21.0605	0.0177616	-0.0137978									6.9618	12	9.4	7.34074	6.53962	6.58386	6.28675	6.3766	6.24566	6.4468	6.27621	6.31144	6.25626	3	3	3	2	2	2	2	2	2	54.347
	TGVEG_205558;TGME49_205558;TGGT1_205558	NAC domain-containing protein	N/A	0	23.477	23.721	23.2017	23.5503	23.5737	23.0027	23.7819	23.7647	23.1934	0.175786	-0.113412									15.712	52	49.2	8.00552	7.16101	7.215	6.93948	7.19515	6.74629	7.04852	6.90939	7.09927	6.93315	6	6	6	5	4	5	4	5	5	20.507
	TGVEG_205690;TGGT1_205690;TGME49_205690	hypothetical protein;putative transmembrane protein	N/A	4	21.5016	21.823	21.4517	NaN	NaN	NaN	NaN	NaN	NaN	0	NaN									18.316	14	15.3	7.17409	6.45791	6.60159	6.3928	5.96339	NaN	5.99345	6.15253	6.0566	6.05323	3	3	3	1	0	1	2	1	1	44.63
	TGVEG_205700;TGME49_205700;TGGT1_205700	cyclophilin precursor	N/A	1	25.8203	25.7766	25.3764	26.0531	25.5024	25.4319	25.7022	26.0041	25.3672	0.0493946	-0.0333888									15.143	51	22.4	8.63808	7.73973	7.76373	7.41775	7.83368	7.60645	7.7174	7.58524	7.74065	7.61473	5	6	5	6	6	6	7	7	7	38.193
	TGVEG_205710;TGME49_205710;TGGT1_205710	lysine-tRNA ligase	HMM: MRSPCSGGKSLFEALSLVFCWRPRVWPR, NN: MRSPCSGGKSLFEALSLVFCWRPRVWPR	0	21.5866	21.6929	21.223	21.8691	21.3399	21.7883	21.3552	21.5388	21.3983	0.173914	0.0700976									12.252	28	11.9	7.38446	6.43051	6.56813	6.39102	6.38241	6.25897	6.50587	6.28778	6.59055	6.3249	4	4	4	3	4	3	3	4	3	74.336
	TGVEG_206320;TGME49_206320;TGGT1_206320	hypothetical protein;putative transmembrane protein	N/A	2	NaN	NaN	20.1089	NaN	NaN	NaN	NaN	NaN	NaN	0	NaN									3.0138	9	5.4	7.03007	6.1231	6.05477	5.97488	6.21397	6.04836	6.17482	5.94666	6.00441	6.06674	1	1	1	1	1	1	1	1	1	32.311
	TGVEG_206470;TGME49_206470;TGGT1_206470	pyruvate dehydrogenase complex subunit PDH-E3II	N/A	0	NaN	NaN	NaN	20.8064	20.6968	20.7529	NaN	NaN	NaN	0	NaN									8.8977	13	10.2	7.16738	6.12545	6.19645	5.98261	6.23333	6.13953	6.26781	6.20369	6.45388	6.16116	1	1	1	2	2	2	2	2	1	55.151
	TGME49_206510;TGVEG_206510;TGGT1_206510	toxolysin TLN4	HMM: MRRPCLFRSTFLLLLALLPLFSLLSESI, NN: MRRPCLFRSTFLLLLALLPLFSLLSESI;N/A	0;1	NaN	18.8161	NaN	NaN	NaN	NaN	NaN	NaN	NaN	0	NaN									2.5054	4	0.6	6.28081	5.60226	5.69561	NaN	5.83093	NaN	NaN	5.52516	NaN	NaN	1	1	0	1	0	0	1	1	0	246.74
	TGVEG_206590;TGME49_206590;TGGT1_206590;TGVEG_242400;TGME49_242400;TGGT1_242400	calcium-dependent protein kinase CDPK2A;calcium-dependent protein kinase CDPK2B	N/A	0	27.8586	28.0377	28.0767	27.9884	28.1297	27.899	28.1366	27.9538	27.962	0.106189	-0.0264339									183.88	238	43.1	9.3384	8.35721	8.45593	8.34498	8.37947	8.36292	8.52665	8.28742	8.32964	8.36397	20	19	19	18	22	22	18	18	18	86.364
	TGVEG_206690;TGGT1_206690	glideosome-associated protein with multiple-membrane spans GAPM2B	N/A	5	NaN	NaN	NaN	NaN	NaN	21.2296	NaN	NaN	NaN	0	NaN									33.183	6	13.6	6.43818	NaN	NaN	NaN	NaN	NaN	6.43818	NaN	NaN	NaN	1	0	1	2	0	1	0	0	1	46.788
	TGGT1_207060	ribonucleoside-diphosphate reductase small subunit	N/A	0	NaN	NaN	20.1579	NaN	NaN	NaN	NaN	NaN	NaN	0	NaN									4.0391	9	9.5	7.00117	6.13944	6.14323	5.98963	6.13399	5.9058	6.13085	5.90384	6.12097	5.80695	1	1	1	1	1	1	1	1	1	44.569
	TGVEG_207440;TGME49_207440;TGGT1_207440	ribosomal protein RPS4	N/A	1	25.3397	25.3639	25.2272	25.4438	24.8327	24.8651	25.0424	25.4944	24.759	0.412255	0.211671									21.61	56	34.9	8.49461	7.70715	7.73072	7.56302	7.56723	7.36365	7.63356	7.24596	7.45096	7.34504	6	7	6	6	6	8	4	4	5	35.507
	TGGT1_207620;TGVEG_207620;TGME49_207620	pyridine nucleotide-disulfide oxidoreductase domain-containing protein	HMM: MASLRSQAWRRVAQRAFSHLSSSSPLFSSGLQGLPAAVSV, NN: MASLRSQAWRRVAQRAFSHLSSSS;HMM: MASLRSQAWRRVAQRAFSHLSSSSPLLSSGLQGL, NN: MASLRSQAWRRVAQRAFSHLSSSS	0	22.611	22.5444	22.3025	22.5292	22.0609	21.9422	22.0781	22.1044	21.885	1.78466	0.463462									23.87	39	11.7	7.60681	6.73683	6.85057	6.57634	6.76273	6.45708	6.72244	6.48544	6.55323	6.55143	5	5	4	4	4	5	4	4	4	71.248
	TGGT1_207640;TGVEG_207640;TGME49_207640	isoleucyl-tRNA synthetase family protein	N/A	0	21.8499	21.6255	21.8235	21.6119	21.8462	NaN	22.082	21.8217	21.424	0.0156416	-0.00962766									5.0673	18	5.2	7.41969	6.60371	6.81447	6.47661	6.48044	6.55025	5.92472	6.16218	6.29539	6.28058	3	4	3	2	3	1	2	3	3	141.42
	TGGT1_207770;TGVEG_207770;TGME49_207770	PCI domain-containing protein	N/A	0	21.9064	21.8182	21.9096	21.9004	22.1415	21.5598	21.7263	21.8342	21.7154	1.16291	0.119453									11.416	22	20.5	7.46667	6.42935	6.59818	6.5955	6.53471	6.57888	6.49086	6.45179	6.42872	6.45759	3	4	4	3	3	3	4	3	3	55.519
	TGGT1_207830;TGVEG_207830;TGME49_207830	MORN repeat-containing protein	N/A	0	27.564	27.626	27.7075	27.5054	27.5417	27.7779	27.2987	27.0791	27.1207	2.38228	0.466366	+	+	+	+			+		85.644	136	53.3	9.21461	8.34422	8.39664	8.28574	8.29321	8.23065	8.44081	8.07507	8.07515	7.98062	12	12	12	14	12	13	10	11	10	39.833
	TGVEG_207840;TGME49_207840;TGGT1_207840	ribosomal protein RPS17	N/A	0	NaN	NaN	21.4077	NaN	NaN	NaN	NaN	NaN	NaN	0	NaN	+								3.6481	7	17.4	7.04976	6.37075	6.30587	6.36586	6.23147	NaN	6.22334	NaN	6.05888	NaN	1	1	1	1	1	1	0	1	0	15.228
	TGVEG_207950;TGME49_207950;TGGT1_207950	hypothetical protein;putative transmembrane protein	HMM: MSLRTFHVPFFISLLVAVFGIVFVVCFFPFLPATAAD, NN: MSLRTFHVPFFISLLVAVFGIVFVVCFFPFLPATAAD;HMM: MSLRTFHVPFFISLLVAVYGIVFVVCFFPFLPATAAG, NN: MSLRTFHVPFFISLLVAVYGIVFVVCFFPFLPATAAG	2	NaN	NaN	NaN	21.974	NaN	22.5616	NaN	NaN	NaN	0	NaN									39.396	11	10.7	7.5972	6.73338	NaN	6.92306	6.66685	NaN	6.77081	6.64025	6.65309	6.80324	1	0	1	1	1	1	1	1	1	19.136
	TGVEG_208030;TGME49_208030;TGGT1_208030	microneme protein MIC4	HMM: MRASLPVHLVVCTQLSAVWFGVAKAH, NN: MRASLPVHLVVCTQLSAVWFGVAKAH	0	NaN	NaN	19.2011	NaN	NaN	NaN	NaN	NaN	NaN	0	NaN									38.251	6	5.3	6.20553	5.62687	5.83162	5.70159	NaN	NaN	NaN	NaN	NaN	NaN	1	2	1	1	0	1	0	0	0	63.021
	TGVEG_208370;TGME49_208370;TGGT1_208370	myosin heavy chain, putative;putative myosin heavy chain	HMM: MRNRRRGLLIFGIVTAMLWLFIDVTTTE, NN: MRNRRRGLLIFGIVTAMLWLFIDVTTTESA	2	20.2342	20.2181	20.1922	20.0853	20.3742	20.1016	20.0647	20.2203	20.7033	0.233704	-0.114621									10.442	13	4.4	6.993	5.9785	6.04395	6.35455	5.9317	5.94654	5.96925	5.79962	5.87566	6.16667	2	2	3	2	2	2	2	2	2	124.83
	TGVEG_208560;TGME49_208560;TGGT1_208560	carrier superfamily protein	N/A	1	21.4003	20.319	NaN	21.5138	20.8033	20.4276	NaN	21.0692	20.4406	0.0543446	0.104745									4.3992	13	4.2	7.15143	6.4283	6.1784	5.89004	6.42708	6.13786	6.2295	5.70283	6.20192	6.13558	2	2	1	2	2	2	2	2	2	72.367
	TGVEG_208590;TGME49_208590;TGGT1_208590	putative vacuolar ATP synthase subunit 54kD;vacuolar ATP synthase subunit 54kD, putative	N/A	0	21.0532	21.4155	20.9599	NaN	NaN	NaN	NaN	NaN	NaN	0	NaN									2.3736	8	4.8	7.03945	6.35719	6.46097	6.23274	6.00052	5.90398	5.7564	5.71746	5.69289	5.83701	2	2	2	1	1	1	1	1	1	53.311
	TGVEG_208790;TGME49_208790;TGGT1_208790	MC family transporter, putative;putative MC family transporter	HMM: MASSAATSLAPSSSAA, NN: MASSAATSLAPSSSAA	0	20.7371	21.0531	20.5173	21.1257	20.8959	20.6147	20.4704	20.9838	20.9991	0.0731042	-0.0485992									9.819	19	17.7	7.1745	6.00924	6.44111	6.35465	6.39396	6.10981	6.02432	5.87437	6.22019	6.22201	2	4	3	4	2	2	2	3	2	33.687
	TGGT1_208830;TGVEG_208830;TGME49_208830	hypothetical protein	HMM: MYRNHSGIRLACRLFEVGALVLALENVSGI, NN: MYRNHSGIRLACRLFEVGALVLAL	0	21.4137	21.5599	21.8104	22.2402	21.079	21.0649	21.7954	21.9126	21.2741	0.104356	-0.0660311									10.886	11	18.8	7.41044	6.59069	6.66336	6.33274	6.59963	6.23267	6.3112	6.34337	6.47637	6.3309	4	4	3	4	3	3	3	3	3	54.896
	TGVEG_209030;TGME49_209030;TGGT1_209030	actin ACT1	N/A	0	27.9171	28.0622	27.9404	27.9626	28.1468	27.7917	28.1596	28.0397	27.8003	0.0820426	-0.0266393									80.454	136	63.6	9.3331	8.39644	8.49143	8.34477	8.41476	8.31677	8.46969	8.27637	8.31463	8.33331	12	13	14	15	13	15	13	14	14	41.907
	TGVEG_209130;TGME49_209130;TGGT1_209130	regulator of chromosome condensation (RCC1) repeat-containing protein	HMM: MGQAATKSGVVIWGAPETTALLSASGPGSAA, NN: MGQAATKSGVVIWGAPETTALLSASGPGSAA	0	22.4449	21.8498	22.2134	21.6252	22.2067	22.3114	NaN	NaN	NaN	0	NaN	+								9.6269	18	10.7	7.40495	6.7052	6.51959	6.67319	6.75546	6.63858	6.35582	NaN	NaN	NaN	3	3	3	5	5	2	0	0	0	101
	TGVEG_209150;TGME49_209150;TGGT1_209150	non-proton pumping type-II NADH dehydrogenase I	HMM: MAGQWLRLLAGASVPMLSLPARCD, NN: MAGQWLRLLAGASVPMLSLPARCD	0	21.0895	21.4418	20.6059	21.292	NaN	20.6615	20.8878	21.0262	20.8082	0.214523	0.138339									9.8164	16	14.7	7.20512	6.37618	6.4824	6.01745	6.46419	5.9305	6.11484	6.11374	6.21595	6.19618	3	3	2	4	1	2	3	3	3	67.025
	TGVEG_209160;TGME49_209160;TGGT1_209160	myristoyl CoA:protein N-myristoyltransferase	N/A	0	21.7962	21.5041	21.2233	21.7941	21.6347	21.7013	21.6448	21.412	21.594	0.0834952	-0.0424271									9.876	20	20.7	7.42614	6.19568	6.43371	5.95277	6.64287	6.39515	6.7428	6.2577	6.43125	6.66065	2	3	2	3	3	5	3	3	3	52.376
	TGVEG_209290;TGME49_209290;TGGT1_209290	ribosomal protein RPS28	HMM: MPFGALFPVSSRFSHTFAPRICVFSFLSHSPSSRLVWGC, NN: MPFGALFPVSSRFSHTFAP	0	NaN	NaN	20.6561	NaN	NaN	NaN	NaN	NaN	NaN	0	NaN									2.5361	2	10.2	6.66867	5.76397	6.43189	6.1396	NaN	NaN	NaN	NaN	NaN	NaN	1	1	1	0	0	0	0	0	0	13.214
	TGVEG_209600;TGME49_209600;TGGT1_209600	hypothetical protein	N/A	0	22.9867	22.7859	22.6259	22.9238	22.4247	22.6834	22.2959	22.6336	22.5318	1.01411	0.312354									19.319	35	21.5	7.73342	6.90824	6.8957	6.71359	6.9038	6.70247	6.85657	6.48962	6.66268	6.70491	6	6	5	5	5	5	4	4	5	50.2
	TGVEG_209720;TGME49_209720;TGGT1_209720	hypothetical protein;putative transmembrane protein	HMM: MTNCLSKLPYVSAACGTASLLVYFFPSTLLSC, NN: MTNCLSKLPYVSAACGTASLLVYFFPSTLLSC	4	23.9414	NaN	23.3429	23.5052	23.7706	23.2419	23.7795	23.5982	23.0709	0.165592	0.159261									18.589	16	18.3	7.9579	7.20213	6.80031	6.96364	7.05162	7.02702	7.04902	6.96396	6.95943	6.89829	2	1	2	2	2	2	2	2	2	23.416
	TGVEG_209800;TGME49_209800;TGGT1_209800	formate/nitrite transporter protein	N/A	6	NaN	NaN	21.7783	NaN	NaN	NaN	21.8377	22.0851	21.8752	0	-0.154345									4.2958	5	13.1	7.307	6.21461	6.27019	6.34021	6.13264	6.18898	6.23972	6.3867	6.4834	6.65005	1	1	2	1	1	1	3	3	3	44.29
	TGVEG_209890;TGME49_209890;TGGT1_209890	hypothetical protein	HMM: MWNCRVCSSTPFASLFGFGSSS, NN: MWNCRVCSSTPFASLFGFGSSS	0	23.2329	23.7772	23.9962	23.7887	23.8632	23.3752	24.174	23.6206	23.7166	0.232689	-0.168333									14.26	34	45.6	8.04112	6.99497	6.97562	6.92141	7.07162	7.11826	7.21706	7.21091	7.13472	7.03941	4	3	2	4	4	5	4	4	3	22.011
	TGVEG_209950;TGME49_209950;TGGT1_209950	putative thioredoxin;thioredoxin, putative	HMM: MAPLRVCAFLPLVCFAFLSLAAGA, NN: MAPLRVCAFLPLVCFAFLSLAAGA	0	21.4925	22.0509	21.4202	22.0394	21.0987	21.6608	21.5931	22.1731	21.3355	0.0497216	-0.0460536									17.82	24	29.7	7.41372	6.32527	6.49072	6.32033	6.48882	6.08508	6.57628	6.63526	6.57267	6.39789	3	3	3	4	2	5	4	5	5	47.699
	TGVEG_210690;TGME49_210690;TGGT1_210690	ribosomal protein RPS6	N/A	0	24.3882	24.353	24.2449	24.4353	24.1444	24.201	24.7605	24.7113	24.1877	0.524208	-0.224492									13.778	61	35.5	8.30993	7.36806	7.39468	7.25278	7.41637	7.28393	7.46382	7.14545	7.30647	7.46916	4	5	6	6	5	7	4	5	6	28.956
	TGVEG_210840;TGME49_210840;TGGT1_210840	arginyl-tRNA synthetase family protein	N/A	0	22.5874	21.7116	22.1093	NaN	NaN	21.6762	22.5351	22.4669	21.7607	0.121827	-0.118146									8.7752	16	11.4	7.50459	6.70414	6.44644	6.60799	6.01343	6.58853	6.44688	6.83305	6.62534	6.1181	3	3	3	2	1	3	4	3	2	67.009
	TGVEG_211030;TGME49_211030;TGGT1_211030	hypothetical protein	N/A	0	NaN	22.0213	21.1509	21.6142	21.266	21.1969	21.5631	21.7115	NaN	0.0370415	-0.0512161									3.9132	9	18.8	7.3294	6.01431	6.58811	6.17336	6.62898	6.30878	6.58189	6.15721	6.33995	6.08575	1	2	2	3	2	3	2	2	1	22.215
	TGVEG_211040;TGME49_211040;TGGT1_211040	Sec61beta family protein	N/A	1	NaN	NaN	NaN	22.83	NaN	NaN	22.9189	22.792	22.4813	0	NaN									18.472	13	32.3	7.59116	6.57289	6.54704	6.35145	6.91815	NaN	6.49216	6.77318	6.82504	6.73998	1	1	1	2	0	1	2	2	2	10.103
	TGVEG_211290;TGME49_211290;TGGT1_211290	rhoptry protein ROP15	HMM: MLKTTPAFFLFLTWMFPRCDGF, NN: MLKTTPAFFLFLTWMFPRCDGF	0	20.9185	21.1481	NaN	21.1612	20.6632	20.6126	NaN	NaN	NaN	0	NaN									7.4905	14	19.5	7.07751	6.27031	6.37519	5.66412	6.30997	6.07929	6.36541	5.87105	5.69205	5.66294	2	2	1	2	2	3	2	1	1	36.586
	TGVEG_211680;TGME49_211680;TGGT1_211680	protein disulfide isomerase	HMM: MRAGFSFALLAVGLLATAVVYSA, NN: MRAGFSFALLAVGLLATAVVYSAAE	0	27.0901	27.1014	26.99	27.2999	26.9336	27.0044	27.2239	27.3937	27.1041	0.922652	-0.180058									71.882	154	60.1	9.06934	8.13783	8.19767	8.02763	8.18219	7.94715	8.19418	7.9728	8.18429	8.10626	18	20	16	18	14	19	19	22	20	52.801
	TGVEG_212250;TGME49_212250;TGGT1_212250	XPG N-terminal domain-containing protein	N/A	0	NaN	NaN	NaN	NaN	19.2169	NaN	NaN	19.2123	19.6793	0	NaN									2.9824	5	8.3	6.43215	NaN	NaN	NaN	5.45465	5.67315	5.77534	5.1934	5.66087	5.86844	0	0	0	1	2	1	1	3	2	47.716
	TGVEG_212290;TGME49_212290;TGGT1_212290	ribosomal protein RPS19	N/A	0	22.9279	23.3827	22.2524	22.9075	21.8351	23.9328	NaN	NaN	23.5296	0	-0.675235									6.0789	15	15	7.85631	6.9509	7.06517	6.81828	6.9333	6.53985	7.13994	6.65579	6.75194	6.93844	3	2	2	2	3	2	1	1	2	34.968
	TGVEG_212300;TGME49_212300;TGGT1_212300	hypothetical protein;putative transmembrane protein	HMM: MSAQGQQGVRSTVAAGKNRFWQPAPITVLLVLSSSFLFAFAA, NN: MSAQGQQGVRSTVAAGKNRFWQPAPITVLLVLSSSFLFAFAA	1	NaN	NaN	20.4303	NaN	NaN	NaN	NaN	NaN	NaN	0	NaN									1.8518	5	4.2	6.83544	6.08902	6.22207	6.07162	6.09001	5.77846	NaN	5.31875	5.57477	5.55273	2	2	2	1	1	0	2	2	1	75.676
	TGVEG_213050;TGME49_213050;TGGT1_213050	hypothetical protein	N/A	0	20.1132	NaN	NaN	NaN	NaN	NaN	NaN	NaN	NaN	0	NaN									1.9127	4	6.2	6.49754	6.05469	NaN	NaN	5.822	NaN	5.80692	NaN	5.84841	NaN	1	0	1	1	0	1	0	1	0	21.263
	TGVEG_213280;TGME49_213280;TGGT1_213280	SAG-related sequence SRS25	HMM: MRTSRLLCAFGAVLLCWVPSWTAHAE, NN: MRTSRLLCAFGAVLLCWVPSWTAH	0	23.5998	23.5188	23.6399	23.4224	23.9772	23.4763	23.9746	24.2668	23.8681	1.6506	-0.450362									17.084	25	21.5	8.04599	7.0876	7.1112	7.04143	7.00869	7.09882	7.10421	7.0571	7.17164	7.12356	2	2	2	2	2	2	2	2	2	20.782
	TGVEG_213350;TGME49_213350;TGGT1_213350	ribosomal protein RPS15	N/A	0	23.296	23.5098	23.1905	23.5414	23.1173	22.7399	23.2326	23.4064	22.8517	0.374173	0.168547									34.723	39	37.3	8.08817	7.21998	7.29863	7.08664	7.28112	7.02395	7.14638	6.90994	7.08465	6.99367	3	3	3	3	3	4	3	3	3	17.157
	TGVEG_213800;TGME49_213800;TGGT1_213800	protein phosphatase 2b regulatory subunit, putative;putative protein phosphatase 2b regulatory subunit	N/A	0	28.0186	27.9551	28.2292	28.2752	28.5261	28.7918	27.8092	27.929	27.7713	1.13785	0.231085	+	+	+	+				+	147.54	220	87.6	9.51623	8.48816	8.5666	8.52056	8.61731	8.65949	8.80721	8.30844	8.40868	8.48097	12	12	12	12	13	13	12	12	12	19.994
	TGVEG_213830;TGME49_213830;TGGT1_213830	putative Ufm1-conjugating enzyme 1;Ufm1-conjugating enzyme 1, putative	N/A	0	NaN	NaN	19.7825	NaN	NaN	NaN	NaN	NaN	NaN	0	NaN									3.2077	7	11.5	6.76161	5.92531	5.96763	5.87662	5.85307	5.61211	6.3285	NaN	NaN	NaN	1	1	1	1	1	1	0	1	0	17.889
	TGVEG_213870;TGME49_213870;TGGT1_213870	UBA/TS-N domain-containing protein	N/A	0	NaN	NaN	NaN	19.7632	NaN	19.6435	NaN	NaN	NaN	0	NaN									7.8161	7	4.2	6.78437	5.43019	5.38966	NaN	5.94073	5.22699	5.93139	6.18744	5.1912	6.2971	1	1	0	2	1	2	1	1	2	117.11
	TGGT1_214080;TGME49_214080;TGVEG_214080	toxofilin	HMM: MAQYKSRPLAAFLLLITVGSLLTASESV, NN: MAQYKSRPLAAFLLLITVGSLLTA;HMM: MAQYKSRPLAAVLLLITVGSLLTASESV, NN: MAQYKSRPLAAVLLLITVGSLLTA	1	22.398	22.9977	22.8741	22.7139	22.3129	22.0531	22.5113	22.724	21.9693	0.541507	0.355132									10.066	27	23.7	7.69241	6.86674	7.09205	6.94315	6.62097	6.40166	6.49937	6.57142	6.69326	6.34994	6	6	6	3	2	3	4	4	3	27.131
	TGVEG_214210;TGME49_214210;TGGT1_214210	rRNA pseudouridine synthase	N/A	0	21.5914	21.4359	21.5111	21.3765	21.7129	21.4813	21.9189	21.9587	NaN	2.24415	-0.425983									11.351	22	23	7.45212	6.51714	6.5283	6.0859	6.55979	6.46684	6.18611	6.32915	6.6347	6.77073	3	4	2	5	3	3	4	3	1	56.744
	TGGT1_214270;TGVEG_214270;TGME49_214270	putative translation initiation factor IF-2;translation initiation factor IF-2, putative	N/A	0	20.6411	20.3515	19.8422	20.7498	NaN	19.7221	20.3437	20.435	20.3706	0.168267	-0.104815									9.9063	15	5.8	6.99054	6.28928	6.00753	5.95763	6.16578	5.61546	5.98168	6.00694	6.12437	5.86306	4	4	3	2	1	2	3	3	2	126.24
	TGVEG_214290;TGME49_214290;TGGT1_214290	DJ-1 family protein	HMM: MSPLGFGAFLSPLLLFCVSPHLRTGV, NN: MSPLGFGAFLSPLLLFCVSPHLRTG	0	22.3292	22.5157	22.3445	22.2135	22.192	22.5063	NaN	NaN	NaN	0	NaN									10.722	25	37.5	7.56108	6.6854	6.75667	6.72285	6.84437	6.51168	6.64347	6.19318	6.34078	6.3365	4	4	4	5	4	3	2	2	1	27.904
	TGVEG_214320;TGME49_214320;TGGT1_214320	facilitative glucose transporter GT1	N/A	12	25.4011	25.6083	25.6474	25.4353	25.5828	25.3171	26.0478	25.6637	25.6142	0.64148	-0.222999									20.791	55	14.1	8.6195	7.65603	7.75435	7.73911	7.5656	7.51059	7.63169	7.64844	7.67237	7.74748	6	6	6	6	5	6	7	7	7	61.687
	TGVEG_214350;TGME49_214350;TGGT1_214350	GTP-binding protein, putative;putative GTP-binding protein	N/A	0	21.7897	21.3927	21.405	NaN	NaN	NaN	21.6269	21.6411	21.4328	0.0918709	-0.0377878									7.6326	12	11.1	7.36803	6.5612	6.47637	6.38639	6.33718	6.54268	6.23935	6.2771	6.39009	6.40142	2	3	2	1	2	1	2	2	2	44.547
	TGVEG_214440;TGGT1_214440;TGME49_214440	4'-phosphopantetheinyl transferase superfamily protein	N/A	0	19.8019	20.1843	NaN	19.76	19.8892	NaN	20.3467	19.6089	NaN	0.0114919	0.0153503									6.965	14	12.4	6.77121	5.98006	6.10762	5.34844	5.90535	5.8879	5.42619	5.92218	5.74541	5.32141	3	3	1	2	2	1	3	3	1	48.49
	TGGT1_214490;TGVEG_214490;TGME49_214490	peptidase M16 inactive domain-containing protein	N/A	0	NaN	NaN	NaN	NaN	NaN	NaN	19.8667	20.1174	20.2476	0	NaN									5.3404	6	4.4	6.39236	NaN	NaN	NaN	NaN	NaN	NaN	5.84237	6.04712	5.81817	0	0	0	0	0	0	3	4	2	148.87
	TGVEG_214750;TGME49_214750;TGGT1_214750	hypothetical protein	HMM: MRVPIAPSSLSKATRRKLAANAAAGPAVSAVPAPAFSLPPSASGR, NN: MRVPIAPSSLSKATRRKLAANAAAGPAVSAVPAPAFSL	0	NaN	NaN	19.3615	NaN	NaN	NaN	NaN	NaN	NaN	0	NaN									3.322	6	2.2	6.63698	5.8818	5.73965	5.74988	5.87443	NaN	5.68565	5.60767	5.67961	5.53735	1	1	1	1	1	1	1	1	1	119.97
	TGVEG_214790;TGME49_214790;TGGT1_214790	glycoprotein	N/A	0	NaN	NaN	NaN	NaN	NaN	NaN	21.9191	21.7534	NaN	0	NaN									5.4743	5	14.8	7.07864	NaN	NaN	NaN	5.87435	6.43343	6.12975	6.37414	6.44708	6.30298	0	0	0	1	1	1	2	2	1	31.444
	TGVEG_214840;TGME49_214840;TGGT1_214840	AP2 domain transcription factor AP2X-7	N/A	0	NaN	NaN	15.5791	NaN	NaN	NaN	NaN	NaN	NaN	0	NaN									2.6017	4	0.8	6.02226	5.33824	5.05591	4.61123	4.86486	5.15296	5.40951	NaN	4.76811	5.17383	1	1	1	1	1	1	0	1	1	184
	TGVEG_214880;TGME49_214880;TGGT1_214880	hypothetical protein	N/A	0	NaN	21.0276	NaN	NaN	NaN	NaN	NaN	NaN	NaN	0	NaN									9.0948	7	7.2	6.36135	NaN	6.36135	NaN	NaN	NaN	NaN	NaN	NaN	NaN	2	2	0	1	0	2	0	0	0	98.189
	TGGT1_215010;TGME49_215010;TGVEG_215010B;TGVEG_215010A	hypothetical protein;protease prsW family protein;putative transmembrane protein	HMM: MALTAVSSASSRSPPSSPSANPHASPALVASALPSSRGT, NN: MALTAVSSASSRSPPSSPSANPHASPALVASALPSSRGT;HMM: MYFCPTYIYIYIYICMYICVSPSLFMLVCASLYLLVVLVLPPCFSR, NN: MYFCPTYIYIYIYICMYICVSPSLFMLVCASLYLLVVLVLPPCFSR;N/A	1;3;6	22.4935	22.752	22.8373	22.8092	22.4961	22.8767	22.7524	22.983	22.8759	0.647218	-0.176172									19.248	38	22.5	7.75996	6.79064	6.94407	6.75459	6.67807	6.57001	6.84533	6.71754	6.85725	6.95362	5	5	5	4	3	5	6	7	8	81.636
	TGVEG_215040;TGME49_215040;TGGT1_215040	HEAT repeat-containing protein	N/A	0	NaN	NaN	NaN	NaN	NaN	NaN	NaN	NaN	18.1178	0	NaN									1.5576	4	0.9	5.81324	NaN	NaN	NaN	4.69447	5.15688	5.31708	NaN	NaN	5.39789	0	0	0	1	1	1	0	0	1	181.83
	TGVEG_215060;TGME49_215060;TGGT1_215060	putative small GTP-binding protein sar1;small GTP-binding protein sar1, putative	N/A	0	20.6751	20.9369	20.9279	21.4937	NaN	21.0191	NaN	NaN	NaN	0	NaN									4.5785	9	30.2	7.0769	6.36654	6.24729	6.2317	6.36827	5.91352	6.39333	5.70862	NaN	NaN	2	2	2	2	1	3	1	0	1	22.138
	TGVEG_215260;TGME49_215260;TGGT1_215260	carbamoylphosphate synthetase	N/A	0	NaN	21.459	NaN	NaN	NaN	NaN	NaN	NaN	NaN	0	NaN	+								7.6832	5	4.6	6.75262	6.04657	6.49122	NaN	NaN	5.70684	5.97135	NaN	NaN	NaN	1	4	0	1	1	1	0	0	0	187.1
	TGVEG_215430;TGME49_215430;TGGT1_215430	hypothetical protein	HMM: MQLTWKQILLIAGGTAAAGA, NN: MQLTWKQILLIAGGTAAA	0	NaN	NaN	NaN	NaN	NaN	NaN	NaN	22.5013	22.1024	0	NaN									6.3115	11	20.5	7.37907	6.45828	6.22575	6.53721	6.63135	6.23333	6.1645	NaN	6.63368	6.62161	2	1	2	3	1	1	0	3	3	27.554
	TGVEG_215460;TGME49_215460;TGGT1_215460	ribosomal protein RPS24	N/A	0	23.836	24.0138	23.9158	24.0755	23.4793	23.5244	23.6778	23.71	23.4205	1.41452	0.319121									8.8083	30	18.7	8.06006	6.92911	7.2891	7.23198	7.28682	6.72282	7.19351	6.80515	7.05736	7.07089	4	5	5	5	3	5	2	4	4	30.375
	TGVEG_215470;TGME49_215470;TGGT1_215470	ribosomal protein RPL10A	N/A	0	24.1575	24.0953	24.2809	24.5022	23.8835	24.0993	24.545	24.1591	24.3027	0.559007	-0.157688									10.794	26	27.6	8.19584	7.36612	7.38562	7.2876	7.31178	6.92579	7.25657	7.17237	7.31687	6.87229	3	3	2	4	3	4	2	3	2	24.603
	TGME49_215640;TGGT1_215640;TGVEG_215640	zinc finger, C3HC4 type (RING finger) domain-containing protein	N/A	0	NaN	NaN	NaN	NaN	NaN	NaN	NaN	NaN	19.4615	0	NaN									1.7247	2	1.2	6.08647	NaN	NaN	NaN	NaN	NaN	NaN	5.76777	NaN	5.80239	0	0	0	0	0	0	1	0	1	160.05
	TGVEG_215980;TGME49_215980;TGGT1_215980	hypothetical protein;putative transmembrane protein	N/A	1	24.2428	24.3271	24.0301	24.2049	24.01	24.1078	23.9584	24.3125	24.1049	0.214265	0.0747534									23.394	35	40.5	8.19493	7.45419	7.44347	7.12463	7.21418	7.11271	7.26792	6.99448	7.17496	7.15842	5	5	3	4	3	3	4	4	4	24.466
	TGVEG_216000;TGME49_216000;TGGT1_216000	alveolin domain containing intermediate filament IMC3	N/A	0	23.686	23.5996	23.9513	23.6023	23.7972	23.3113	23.3661	23.5147	23.3606	1.32484	0.33179									28.428	39	23.8	8.01687	7.13328	7.147	7.15262	7.02073	6.88546	7.35713	6.77362	6.89233	6.87259	6	6	6	5	3	6	5	5	5	57.999
	TGVEG_216180;TGME49_216180;TGGT1_216180	hypothetical protein;putative transmembrane protein	HMM: MITVILCSVLFYSLGLVAPTSAA, NN: MITVILCSVLFYSLGLVAPTSAA	3	NaN	22.8694	23.9977	23.6705	23.7903	23.7485	24.618	24.3246	NaN	0.663591	-1.03776									7.1267	19	21.8	8.05003	7.03088	6.89911	7.10078	7.24065	6.91918	7.33106	7.15658	7.15296	6.71845	1	2	3	3	2	3	2	2	1	16.441
	TGVEG_216450;TGME49_216450;TGGT1_216450	peptidase, T1 family protein	N/A	0	NaN	NaN	NaN	20.6542	20.6341	19.8028	NaN	20.0185	20.2002	0	NaN									4.6821	13	11.2	6.9581	6.07602	6.15174	NaN	6.17993	6.07551	5.99816	5.90573	5.90925	6.06277	1	2	1	2	2	2	1	2	2	27.939
	TGGT1_216590;TGVEG_216590;TGME49_216590	HEAT repeat-containing protein	N/A	0	21.5364	20.6897	20.7967	NaN	NaN	NaN	20.307	20.5582	21.3268	0.273451	0.27693									10.543	13	8.3	7.06435	6.39247	6.29263	6.10677	5.46827	5.24189	5.81608	6.03375	6.17246	6.34161	3	3	2	1	1	2	4	3	3	111.14
	TGGT1_216650;TGVEG_216650;TGME49_216650	S15 sporozoite-expressed protein	N/A	0	21.602	21.8051	21.6439	22.2049	21.7197	21.705	NaN	NaN	NaN	0	NaN									7.2201	17	15	7.46271	6.44773	6.53543	6.33748	6.75891	6.52101	6.48143	6.29833	6.4444	6.57425	2	2	3	3	3	2	2	2	3	45.118
	TGGT1_216670;TGVEG_216670;TGME49_216670	FUSE-binding protein 2 / KH-type splicing regulatory protein	N/A	0	23.9295	23.8995	24.0511	23.8991	23.9971	23.6821	24.0518	24.1671	23.6248	0.0236605	0.0121257									60.952	76	29.9	8.10697	7.35442	7.38614	7.16705	7.06509	6.96362	6.92397	7.02057	7.18904	7.04704	12	15	10	7	6	6	10	10	10	100.05
	TGVEG_216730;TGME49_216730;TGGT1_216730	MCM2/3/5 family protein	N/A	0	NaN	NaN	NaN	NaN	NaN	NaN	NaN	18.8645	NaN	0	NaN									1.8894	3	1.7	5.55823	NaN	NaN	NaN	NaN	NaN	NaN	NaN	5.55823	NaN	1	1	0	0	0	0	0	1	0	113.22
	TGVEG_216790;TGME49_216790;TGGT1_216790	ATP-binding cassette sub-family E member 1, putative;putative ATP-binding cassette sub-family E member 1	N/A	0	NaN	18.6183	NaN	NaN	NaN	NaN	NaN	NaN	NaN	0	NaN									2.4039	3	4.4	5.98448	5.72616	5.63609	NaN	NaN	NaN	NaN	NaN	NaN	NaN	2	2	0	0	0	0	0	0	0	69.219
	TGVEG_216860;TGME49_216860;TGGT1_216860	DEAD (Asp-Glu-Ala-Asp) box polypeptide DDX39	N/A	0	25.4812	25.4046	25.6766	25.4629	25.2107	25.2129	25.3754	25.4265	25.281	0.808301	0.159856									185.34	112	58.1	8.55156	7.64562	7.76512	7.74624	7.61542	7.44173	7.6285	7.35583	7.47211	7.53323	14	15	15	11	13	12	13	14	16	49.113
	TGVEG_216880;TGME49_216880;TGGT1_216880	guanine nucleotide-binding protein	N/A	0	26.153	26.2605	26.2934	26.2738	25.584	26.0402	26.3732	26.1458	26.1792	0.0115549	0.00289154									93.446	85	49.2	8.77326	7.87117	7.92839	7.79411	7.86016	7.66426	7.8136	7.7071	7.83167	7.84113	10	9	9	9	9	9	9	10	10	35.147
	TGVEG_217460;TGME49_217460;TGGT1_217460	glutaminyl-tRNA synthetase (GlnRS)	HMM: MALSPGAVLRITRLASLPPLSTVTDVVLAY, NN: MALSPGAVLRITRLASLPPLSTVTDVVLAY	0	24.3217	24.38	24.2867	24.528	24.3939	24.183	24.5549	24.6271	24.341	0.924161	-0.178193									53.199	80	25.2	8.2446	7.42833	7.44429	7.28881	7.23221	7.17557	7.18087	7.18523	7.32498	7.25249	13	13	12	8	7	8	10	11	9	95.526
	TGVEG_217510;TGME49_217510;TGGT1_217510	hypothetical protein	N/A	0	NaN	NaN	19.5016	NaN	NaN	NaN	NaN	NaN	NaN	0	NaN									5.5015	6	5.3	6.80016	5.97517	5.9763	5.79206	5.7677	5.86527	5.99855	5.90308	NaN	5.83595	1	1	1	1	1	1	1	0	1	42.13
	TGGT1_217680;TGVEG_217680;TGME49_217680	hypothetical protein	N/A	0	NaN	19.1575	NaN	NaN	NaN	NaN	NaN	NaN	NaN	0	NaN	+								7.7102	9	1.9	6.3067	5.69766	5.79837	NaN	NaN	NaN	NaN	5.55161	5.73483	NaN	1	1	1	0	0	1	1	2	0	243.03
	TGGT1_217688;TGVEG_217688;TGME49_217688	hypothetical protein	N/A	0	NaN	NaN	19.2247	NaN	NaN	NaN	NaN	NaN	NaN	0	NaN									3.7983	3	5.1	6.11434	5.62508	5.56598	5.7087	NaN	NaN	NaN	NaN	NaN	NaN	1	1	1	1	0	0	0	0	0	85.229
	TGVEG_217740;TGME49_217740;TGGT1_217740	3-ketoacyl-(acyl-carrier-protein) reductase	HMM: METPVSVQTARRPSPSRSLNLLTLALSLFFAPTVSAR, NN: METPVSVQTARRPSPSRSLNLLTLALSLFFAPTVSAR;HMM: METPVSVQTARRPSSSRSLNLLTLALSLFFAPTVSAR, NN: METPVSVQTARRPSSSRSLNLLTLALSLFFAPTVSAR	0	NaN	20.9336	20.5925	NaN	NaN	NaN	NaN	NaN	NaN	0	NaN									3.9951	11	8.8	6.85757	5.83002	6.32956	6.1248	5.76037	5.85184	5.86593	5.38231	5.55622	5.64027	1	2	2	1	1	1	1	1	1	39.04
	TGVEG_217820;TGME49_217820;TGGT1_217820	PCI domain-containing protein	N/A	0	22.9764	22.7542	22.8828	22.8784	23.0448	22.7439	22.8812	23.1281	22.6266	0.0157126	-0.0075105									45.339	36	31.1	7.79566	6.77179	6.72371	6.68326	6.95093	6.62985	7.07515	6.49553	6.93913	6.97925	4	4	3	5	3	7	4	6	6	51.722
	TGGT1_217870;TGVEG_217870;TGME49_217870	DHHC zinc finger domain-containing protein	HMM: MYATSRAVRGLSLIPLVIVTGLFLFAW, NN: MYATSRAVRGLSLIPLVIVTGLFLFAWITYVYIY	4	21.5748	21.6912	22.0363	21.6388	21.5038	22.1791	22.5011	22.4235	22.4005	2.04798	-0.674267									58.577	26	16.7	7.53038	6.46984	6.60227	6.54315	6.47324	6.42239	6.72171	6.58075	6.48842	6.7555	2	2	2	2	3	2	3	3	4	47.156
	TGVEG_217890;TGME49_217890;TGGT1_217890	alkyl hydroperoxide reductase/ Thiol specific antioxidant/ Mal allergen, putative;putative alkyl hydroperoxide reductase/ Thiol specific antioxidant/ Mal allergen	N/A	0	24.1595	23.6219	24.0873	23.6462	23.6109	23.5467	23.7332	23.5942	23.4889	0.895102	0.350801									16.719	54	55.6	8.04477	7.1372	7.05154	7.01733	7.159	6.9956	7.14591	7.04167	7.13963	7.0924	4	4	4	6	4	4	6	6	5	21.722
	TGVEG_218240;TGME49_218240;TGGT1_218240	hypothetical protein;putative transmembrane protein	HMM: MRPAFSGTSQGAGTRALWRWGRRSSFVSLCAASFLGVILLGSAQESLSA, NN: MRPAFSGTSQGAGTRALWRWGRRSSFVSLCAASFLGVILLGSAQESLSA	1	NaN	21.2119	21.3829	NaN	NaN	NaN	NaN	21.6819	21.3165	0.374106	-0.201797									3.0761	14	2.6	7.25542	6.49962	6.27026	6.51147	6.1687	6.30999	NaN	6.21764	6.24002	6.45202	2	2	3	2	2	1	1	2	2	132.28
	TGVEG_218250;TGME49_218250;TGGT1_218250	TAP42 family protein	N/A	0	NaN	NaN	17.683	NaN	NaN	NaN	NaN	NaN	NaN	0	NaN									1.5069	2	2.1	6.00368	5.21152	NaN	5.2446	5.11404	5.36754	5.48708	NaN	NaN	NaN	1	0	1	1	1	1	0	0	0	56.861
	TGVEG_261240;TGVEG_218260;TGME49_261240;TGME49_218260;TGGT1_261240;TGGT1_218260	histone H3;histone H3.3	N/A	0	27.4928	25.6935	27.3217	26.929	26.5932	26.8634	26.6462	27.6381	27.1098	0.174632	-0.295337									3.3755	15	23.5	9.03084	7.64186	8.28538	8.19838	8.04021	7.8982	8.04281	7.84537	8.10178	8.26312	2	3	4	2	3	3	2	2	2	15.402
	TGVEG_218270;TGME49_218270;TGGT1_218270	hypothetical protein;putative transmembrane protein	HMM: MCCMLVGLKHWEYCLSLGSAAVWYAIVSFCCAVWQLAAV, NN: MCCMLVGLKHWEYCLSLGSAAVWYAIVSFCCAVWQLAAV	8	22.9736	NaN	NaN	NaN	NaN	NaN	NaN	NaN	NaN	0	NaN									2.67	1	6.3	6.91574	6.91574	NaN	NaN	NaN	NaN	NaN	NaN	NaN	NaN	1	0	0	0	0	0	0	0	0	39.047
	TGVEG_218280;TGME49_218280;TGGT1_218280	eukaryotic porin, putative;putative eukaryotic porin	N/A	0	NaN	NaN	16.6819	NaN	NaN	NaN	NaN	NaN	NaN	0	NaN									2.8461	5	6.2	6.28796	5.55685	5.65732	4.94324	5.42766	5.21998	5.78144	NaN	NaN	NaN	1	2	1	1	1	2	0	1	0	50.57
	TGVEG_218410;TGME49_218410;TGGT1_218410	ribosomal protein RPP0	N/A	0	26.5969	26.6775	26.5549	26.58	26.7327	26.5168	26.6636	26.6181	26.4167	0.20029	0.0436395									47.792	105	39.2	8.90873	8.02894	8.05892	7.91683	7.97933	7.94332	8.02375	7.79857	7.87696	7.90043	10	10	10	10	9	10	9	9	9	34.157
	TGVEG_218540;TGME49_218540;TGGT1_218540	peptidase S15, putative;putative peptidase S15	HMM: MGFSSSNWSWAGLGCGLLALAILLPPDPGL, NN: MGFSSSNWSWAGLGCGLLALAI	1	NaN	NaN	NaN	NaN	NaN	19.6725	NaN	NaN	NaN	0	NaN	+								2.011	10	7.8	6.60151	5.68604	5.65951	5.41817	5.61042	5.56532	5.96947	5.25208	5.56687	5.72929	1	1	1	1	1	2	1	1	1	45.147
	TGME49_218560;TGVEG_218560;TGGT1_218560	acetyl-coA carboxylase ACC2	N/A	0	22.9362	22.57	22.8932	22.932	23.1749	22.4567	23.6772	22.9955	22.9594	0.721529	-0.410904									19.188	34	3.7	7.79061	6.7686	6.58194	6.851	6.87279	6.8801	6.61504	7.02218	6.87866	6.8868	4	4	5	5	5	5	6	6	5	365.03
	TGVEG_218760;TGGT1_218760;TGME49_218760	putative SNAP protein (soluble N-ethylmaleimide-sensitive factor Attachment Protein);SNAP protein (soluble N-ethylmaleimide-sensitive factor Attachment Protein), putative	N/A	0	NaN	NaN	NaN	NaN	NaN	NaN	20.5012	19.977	NaN	0	NaN									4.1638	5	10.3	6.64151	NaN	5.71193	5.61962	5.69774	5.65615	NaN	5.95866	5.90231	5.89726	0	1	1	1	1	0	2	2	1	35.836
	TGGT1_218780;TGME49_218780;TGVEG_218780	phosphoserine aminotransferase, putative;putative phosphoserine aminotransferase	N/A	0	21.9396	21.7926	21.9636	22.185	21.5134	21.4625	21.9163	22.407	NaN	0.567092	-0.263105									15.947	22	24.7	7.4665	6.57446	6.66659	6.44922	6.46657	6.5798	6.58022	6.47427	6.5001	6.14351	2	3	3	3	4	4	3	4	2	52.8
	TGVEG_218910;TGME49_218910;TGGT1_218910	hypothetical protein;putative transmembrane protein	HMM: MAGWAIGDFNYTMLLQLVDQEISVFDYLKANYVFLALIAVSVLLLALWLFLCLPKVFCR, NN: MAGWAIGDFNYTMLLQLVDQEISVFDYLKANYVFLALIAVSVLLLALWLFLCLPKVFCR	5	20.539	20.5265	NaN	20.7133	20.6677	20.7174	NaN	21.071	20.9582	1.86678	-0.481836									7.1233	13	7.9	7.10116	6.16551	6.16917	5.71194	6.17386	6.08828	6.26439	5.9124	6.31509	6.23779	2	2	1	2	2	2	2	3	2	81.617
	TGME49_219170;TGGT1_219170;TGVEG_219170	hypothetical protein	N/A	0	22.4457	22.3923	22.0686	22.2496	22.896	22.4957	22.842	22.6685	22.9813	1.62628	-0.528379									53.811	36	23.9	7.68402	6.88973	6.6174	6.36732	6.52825	6.58618	6.6764	6.82874	6.80385	6.95383	4	3	3	3	3	4	4	4	4	33.334
	TGGT1_219250;TGVEG_219250;TGME49_219250	acetyltransferase, GNAT family protein	N/A	1	NaN	20.7826	20.5611	20.6591	NaN	NaN	20.5007	NaN	NaN	0	0.1712									6.3035	8	5	6.95579	5.77466	6.27722	6.09583	6.23292	5.76746	5.81867	5.93555	5.58889	6.03858	1	3	2	2	2	1	2	1	1	89.441
	TGVEG_219270;TGME49_219270;TGGT1_219270	multi-pass transmembrane protein	N/A	6	21.2396	22.4505	22.3546	21.7926	22.5518	22.8643	22.4692	22.341	23.2405	0.627763	-0.668684									60.01	36	33.7	7.74457	6.30382	6.60641	6.42531	6.74342	6.7014	7.16752	6.28228	6.87622	7.08311	3	2	2	4	3	4	2	5	3	43.033
	TGVEG_219310;TGME49_219310;TGGT1_219310	DnaK family protein	N/A	0	24.5196	24.6244	24.614	24.6771	24.9782	24.4531	24.7252	24.6636	24.5984	0.704377	-0.0764186									134.53	104	33.6	8.32274	7.34937	7.36966	7.24935	7.59456	7.38319	7.4239	7.19879	7.23497	7.37491	12	12	11	14	11	14	11	9	13	90.156
	TGVEG_219520;TGME49_219520;TGGT1_219520	histone arginine methyltransferase PRMT1	N/A	0	NaN	NaN	20.3331	20.6152	NaN	20.593	NaN	20.4879	20.7962	0	-0.308958									4.9241	12	11.2	7.01565	5.72774	6.07467	5.90536	6.40804	6.10701	6.16744	5.41457	5.9587	6.13459	1	1	2	3	1	2	1	2	2	44.033
	TGVEG_219540;TGME49_219540;TGGT1_219540	cytosolic tRNA-Ala synthetase	HMM: MLDVPILCALLVLLLSSLPAGAGAL, NN: MLDVPILCALLVLLLSSLPAGAGAL	0	25.3421	25.4048	25.2138	25.5291	25.2542	25.2355	25.4336	25.454	25.3569	0.676484	-0.0946248									52.64	143	26.8	8.53758	7.67052	7.70537	7.47458	7.63786	7.53363	7.63612	7.48336	7.48659	7.54955	19	16	18	18	16	17	16	18	15	139.29
	TGVEG_219550;TGME49_219550;TGGT1_219550	dihydrolipoyllysine-residue succinyltransferase component of oxoglutarate dehydrogenase	HMM: MPVLAAAAAASRRGLSSLLLPVECR, NN: MPVLAAAAAASRRGLSSLLLPVECR	0	23.2094	23.0251	22.6265	23.009	23.7537	23.6331	23.0611	23.2505	24.0504	0.648765	-0.500348									20.474	33	32.1	7.92048	6.8817	6.78793	6.4829	7.02094	7.01153	7.00509	6.8862	6.93882	7.28362	5	5	4	3	5	5	3	2	4	50.125
	TGVEG_219700;TGME49_219700;TGGT1_219700	DNA replication licensing factor MCM4, putative;putative DNA replication licensing factor MCM4	N/A	0	NaN	NaN	NaN	NaN	NaN	NaN	NaN	NaN	16.548	0	NaN									8.9494	4	5.5	6.13685	5.39884	5.72631	NaN	NaN	NaN	NaN	NaN	5.70172	4.92536	1	1	0	0	0	0	0	1	1	111.92
	TGVEG_219750;TGME49_219750;TGGT1_219750	cytochrome c, putative;putative cytochrome c	N/A	0	NaN	21.7157	NaN	22.0225	NaN	NaN	NaN	NaN	NaN	0	NaN									5.209	14	32.2	7.0566	5.83524	6.57809	5.59248	6.58755	5.83074	5.78953	5.63065	5.61305	5.72596	1	3	1	2	1	2	1	2	2	12.453
	TGVEG_219810;TGME49_219810;TGGT1_219810	hypothetical protein;putative transmembrane protein	N/A	1	NaN	17.3376	NaN	NaN	NaN	NaN	NaN	NaN	NaN	0	NaN									3.1522	2	3.6	5.84703	5.50152	5.25054	NaN	5.3175	NaN	NaN	NaN	NaN	NaN	1	1	0	1	0	0	0	0	0	106.43
	TGVEG_289750;TGME49_289750;TGGT1_289750;TGVEG_219820;TGGT1_219820;TGME49_219820	polyubiquitin UbC, putative;putative polyubiquitin UbC;ribosomal-ubiquitin protein RPL40	N/A	0	NaN	NaN	NaN	NaN	NaN	NaN	NaN	NaN	24.6373	0	NaN									3.4526	2	36.4	7.87705	NaN	NaN	NaN	NaN	NaN	NaN	7.38996	7.44509	7.36046	0	0	0	0	0	0	1	1	1	14.685
	TGVEG_219850;TGME49_219850;TGGT1_219850	prolyl-tRNA synthetase (ProRS)	HMM: MRPGVFSRGFCRPGTLFSPFSLLFSSLWWTLWTRPSTTLAF, NN: MRPGVFSRGFCRPGTLFSPFSLLFSSLWWTLWTR	0	25.0132	25.1064	25.2494	25.01	24.8893	24.9429	25.4245	25.3442	25.0274	0.438051	-0.142342									45.016	84	37.1	8.46459	7.45174	7.65891	7.4422	7.51672	7.4133	7.60978	7.45703	7.48858	7.49094	10	13	11	15	15	18	13	12	12	93.444
	TGVEG_220100;TGME49_220100;TGGT1_220100	phosphoribosylpyrophosphate synthetase	N/A	0	NaN	NaN	NaN	NaN	20.67	NaN	NaN	NaN	NaN	0	NaN									4.6851	3	5.6	6.64137	NaN	5.07383	NaN	6.02865	6.10921	NaN	5.93247	6.02135	NaN	0	1	0	1	2	0	1	1	0	60.997
	TGGT1_220240;TGVEG_220240;TGME49_220240	hypothetical protein;putative transmembrane protein	HMM: MEVRHRSVQLFWVVGLLGFLIYVVSLHGSPVNAA, NN: MEVRHRSVQLFWVVGLLGFLIYVVSLHGS	2	NaN	NaN	NaN	NaN	NaN	NaN	NaN	19.6154	NaN	0	NaN									3.5559	4	7.8	6.60763	NaN	5.74589	NaN	6.10616	NaN	5.84462	5.95897	5.78427	NaN	0	2	0	1	0	1	1	1	0	54.11
	TGVEG_220270;TGME49_220270;TGGT1_220270	alveolin domain containing intermediate filament IMC6	N/A	0	25.0835	24.9785	25.4015	24.8309	24.987	24.8918	25.0613	25.2002	24.9202	0.246635	0.0939554									29.113	61	36.9	8.43407	7.50014	7.53392	7.76395	7.2763	7.26357	7.43634	7.36442	7.44977	7.50427	9	9	9	6	6	7	9	10	9	48.634
	TGVEG_220390;TGME49_220390;TGGT1_220390	hypothetical protein;putative transmembrane protein	N/A	4	21.4866	21.7819	21.8042	21.8285	22.4599	21.3714	21.7507	21.5207	21.6082	0.203107	0.0644023									4.8336	21	9.5	7.45153	6.50779	6.63398	6.52405	6.51724	6.57124	6.51093	6.35108	6.3616	6.41724	2	2	2	2	2	2	2	2	2	29.263
	TGVEG_220400;TGGT1_220400;TGME49_220400	actin depolymerizing factor ADF	N/A	0	23.8744	24.1096	23.3647	23.7899	23.558	24.2519	23.4869	23.5577	23.8469	0.244919	0.152407									9.7812	21	44.9	8.05736	7.05968	7.39681	6.57424	6.85448	6.66701	7.15128	7.16755	7.23744	7.2045	3	3	2	3	2	2	4	4	3	12.948
	TGVEG_220600A;TGME49_220600;TGGT1_220600	hypothetical protein;putative transporter	N/A	10;5	NaN	NaN	NaN	21.2847	NaN	20.9847	NaN	NaN	NaN	0	NaN									5.6497	9	11.2	7.09015	6.14183	5.97793	5.83688	6.26963	6.04735	6.46541	6.01494	6.07126	6.06982	1	1	1	2	2	3	1	1	1	61.471
	TGVEG_220900;TGME49_220900;TGGT1_220900	hypothetical protein	N/A	0	NaN	23.25	22.741	23.1905	23.024	23.0656	23.6763	23.6513	23.6212	1.38101	-0.654112									60.342	29	13.5	7.84231	6.40061	6.61446	6.33373	6.6073	6.65131	6.81309	7.09576	7.21937	7.22253	1	2	3	2	3	3	5	6	5	77.967
	TGVEG_220930;TGME49_220930;TGGT1_220930	hypothetical protein;plasma-membrane choline transporter	N/A	8	23.3347	23.6494	23.6486	23.4868	23.3545	23.4989	23.9012	23.5851	23.7043	0.596066	-0.185972									45.22	62	16.6	8.00958	6.98843	7.17281	7.03137	7.16062	6.94312	7.09691	7.03906	6.92034	7.07365	8	8	8	8	7	8	6	5	6	74.068
	TGGT1_220950;TGME49_220950	hypothetical protein	N/A	0	24.1625	24.1387	23.7544	24.0864	24.0976	24.2938	23.6675	24.1116	24.4988	0.0967981	-0.0741418									30.068	25	29	8.15972	7.19418	7.25638	7.13127	7.22572	7.13312	7.32535	7.02559	7.14035	7.32748	3	3	3	3	3	3	3	3	3	35.62
	TGVEG_221170A;TGME49_221170;TGGT1_221170	CAAX metallo endopeptidase	N/A	3;5	NaN	NaN	NaN	NaN	22.2842	NaN	22.0349	21.6114	21.7277	0	NaN	+								3.3038	12	9.5	7.32646	5.89355	6.32541	6.36195	6.26076	6.65188	6.33612	6.4249	6.38603	6.38678	1	2	2	1	1	1	1	1	1	26.228
	TGME49_221180;TGVEG_221180;TGGT1_221180	hypothetical protein;putative transmembrane protein	HMM: MAGSIHRASGVCRCIFFFLVASLAAPREGCAV, NN: MAGSIHRASGVCRCIFFFLVASLAAPREGCAV	5	NaN	NaN	NaN	NaN	18.9685	NaN	NaN	NaN	NaN	0	NaN									2.5929	2	8.5	5.91186	NaN	NaN	NaN	5.62421	5.59701	NaN	NaN	NaN	NaN	0	0	1	1	1	0	0	0	0	77.084
	TGVEG_221210;TGME49_221210;TGGT1_221210	cyclophilin	HMM: MKLVLFFLALAVSGAVAE, NN: MKLVLFFLALAVSGAVAE;HMM: MKLVLLFLALAVSGAVAE, NN: MKLVLLFLALAVSGAVAE	0	21.6105	22.3199	22.0525	NaN	NaN	NaN	NaN	NaN	NaN	0	NaN									5.8492	9	35.8	7.27154	6.27247	6.81555	6.60552	6.1357	6.15363	6.1295	6.07733	NaN	5.95887	3	3	3	1	1	1	2	0	1	19.638
	TGGT1_221320;TGVEG_221320;TGME49_221320	acetyl-CoA carboxylase ACC1	HMM: MPIRTHARVRSVCTMGVVSRAAAA, NN: MPIRTHARVRSVCTMGVVSRAAAA;HMM: MPTRTHARVRSVCTMGVVSRAAAA, NN: MPTRTHARVRSVCTMGVVSRAAAA	1	29.894	29.962	30.1156	29.8666	30.2347	29.9239	30.6174	30.1634	30.4102	1.29875	-0.406476									323.31	1042	54.4	9.97749	9.01301	9.01741	8.96151	8.98257	9.00178	9.09321	9.04383	8.9602	9.10914	95	95	97	96	96	102	101	99	105	287.81
	TGVEG_221380;TGME49_221380;TGGT1_221380	alba 1	N/A	0	NaN	NaN	21.0023	NaN	NaN	NaN	NaN	NaN	NaN	0	NaN									5.9065	9	21.9	7.00612	NaN	6.25643	6.39414	6.15131	6.13078	6.00677	NaN	6.00385	6.0278	0	2	2	1	1	1	1	1	1	27.258
	TGVEG_221470;TGME49_221470;TGGT1_221470	hypothetical protein	N/A	0	NaN	NaN	NaN	NaN	NaN	NaN	21.1824	20.9256	20.735	0	NaN									5.2237	12	6.9	6.94922	5.86931	5.96582	5.93838	6.01941	NaN	5.8829	6.01812	6.38662	6.03214	1	1	1	1	0	1	2	3	2	61.617
	TGVEG_221530;TGME49_221530;TGGT1_221530	hypothetical protein	HMM: MGNQPVGVAGTFALASPSGFVASQ, NN: MGNQPVGVAGTFALASPSGFVASQ	0	NaN	NaN	20.2749	NaN	NaN	NaN	NaN	NaN	NaN	0	NaN	+								2.6114	2	3.6	6.57995	6.1438	6.13037	6.02481	NaN	NaN	NaN	NaN	NaN	NaN	1	1	1	0	0	0	0	0	0	47.693
	TGVEG_221620;TGME49_221620;TGGT1_221620;TGVEG_212240;TGME49_212240;TGGT1_212240	beta-1 tubulin, putative;beta-tubulin, putative;putative beta-1 tubulin;putative beta-tubulin	N/A	0	20.8293	21.0964	NaN	NaN	NaN	NaN	NaN	NaN	NaN	0	NaN									3.1502	6	51.4	6.94789	6.2671	6.38462	5.99473	5.72862	5.69671	6.10493	NaN	5.63274	5.94051	2	2	1	1	1	1	0	1	1	50.037
	TGVEG_221670;TGME49_221670;TGGT1_221670	transcriptional elongation factor FACT140	N/A	0	18.0698	NaN	NaN	NaN	NaN	NaN	NaN	NaN	NaN	0	NaN									3.1949	2	1.9	5.43955	5.43955	NaN	NaN	NaN	NaN	NaN	NaN	NaN	NaN	1	0	0	0	1	0	0	0	0	134.6
	TGVEG_221870;TGGT1_221870;TGME49_221870	hypothetical protein	N/A	0	21.8791	21.8556	20.9131	20.3909	22.257	22.638	21.7451	21.4665	22.3555	0.302075	-0.306439									20.622	27	10.1	7.49252	6.50492	6.41702	6.13906	6.29688	6.56248	7.00625	6.5407	6.03218	6.55238	3	2	3	4	4	6	4	3	4	144.05
	TGVEG_222160;TGME49_222160;TGGT1_222160	aldehyde dehydrogenase	N/A	0	NaN	NaN	NaN	NaN	NaN	19.3132	NaN	NaN	NaN	0	NaN									3.749	4	11.7	6.59683	NaN	NaN	NaN	5.82545	NaN	5.86131	5.8746	6.00139	5.90526	0	0	1	1	0	1	1	2	1	53.729
	TGVEG_222170;TGME49_222170;TGGT1_222170	dense-granule antigen DG32	N/A	0	NaN	NaN	NaN	NaN	NaN	NaN	NaN	21.8662	NaN	0	NaN									1.8213	7	9.3	7.07769	6.26143	6.48806	6.30387	NaN	NaN	NaN	6.02902	6.46181	6.03286	1	1	1	0	0	0	1	2	1	33.637
	TGVEG_222220;TGME49_222220;TGGT1_222220	alveolin domain containing intermediate filament IMC7	N/A	0	22.739	22.4541	22.8407	22.5225	22.7596	21.9979	23.0398	22.6067	22.0091	0.146225	0.126026									17.056	23	11.7	7.69879	6.9402	6.92867	6.90584	6.6867	6.45769	6.6112	6.70448	6.66076	6.51473	3	4	4	2	1	2	3	3	2	46.784
	TGVEG_222380;TGME49_222380;TGGT1_222380	importin-beta N-terminal domain-containing protein	N/A	0	22.0153	21.8581	21.6613	21.8273	21.9349	21.7935	22.0845	21.8602	22.0432	0.5402	-0.151049									9.7496	32	7.4	7.49456	6.71198	6.60892	6.53438	6.46727	6.06603	6.5361	6.4618	6.48715	6.70682	6	5	6	4	2	4	6	5	6	129.49
	TGVEG_222410;TGME49_222410;TGGT1_222410	hypothetical protein;lipase maturation factor	N/A	7	NaN	NaN	17.9653	NaN	NaN	NaN	NaN	NaN	NaN	0	NaN									2.5193	9	2.3	6.61034	5.78992	5.65642	5.32958	5.57459	5.43051	6.00082	5.2686	5.44976	5.83213	1	1	1	1	1	1	1	1	1	77.523
	TGVEG_222860;TGME49_222860;TGGT1_222860	eukaryotic translation initiation factor, putative;putative eukaryotic translation initiation factor	N/A	0	23.2208	23.1456	22.9851	23.3239	23.3351	23.1042	22.9072	23.4343	23.186	0.128693	-0.0586764									13.515	29	14.6	7.88056	6.9509	6.92943	6.9125	7.00685	6.71917	6.91632	6.68625	6.97542	7.09339	6	5	6	7	3	6	6	6	6	88.391
	TGVEG_223050;TGME49_223050;TGGT1_223050	ribosomal protein RPS20	N/A	0	23.5376	23.8435	23.827	23.3713	23.2521	23.0521	24.5877	23.5372	24.1039	0.459856	-0.34019									5.597	18	16.3	8.03531	7.08927	7.21101	7.06341	6.94008	6.82591	6.94093	7.23462	6.90864	7.27768	3	4	3	2	2	2	2	2	2	25.899
	TGVEG_223110;TGME49_223110;TGGT1_223110	glycolipid transfer protein GLTP	N/A	0	NaN	NaN	18.6142	NaN	NaN	NaN	NaN	NaN	NaN	0	NaN									5.1548	11	11.7	6.61029	5.73105	5.74732	5.5249	5.68047	5.6942	5.83607	5.4264	5.50002	5.60412	1	1	1	1	1	1	1	1	1	25.338
	TGVEG_223140;TGME49_223140;TGGT1_223140	tRNA binding domain-containing protein	HMM: MELIYDSTPAALATVLLARYVQPCLLQ, NN: MELIYDSTPAALATVLLARYVQPCLLQ	0	NaN	22.0976	21.9431	NaN	NaN	NaN	21.7607	21.6239	NaN	1.06393	0.327998									7.08	15	14.6	7.25571	5.78534	6.58499	6.51824	5.77045	6.03782	6.419	6.33147	6.5156	5.72963	1	3	2	1	2	2	2	2	1	51.026
	TGVEG_223390;TGME49_223390;TGGT1_223390	activating signal cointegrator 1 complex subunit 3 family 1 ASCC3L1, putative;putative activating signal cointegrator 1 complex subunit 3 family 1 ASCC3L1	N/A	0	20.1563	NaN	NaN	NaN	NaN	NaN	NaN	19.8788	NaN	0	0.277527									5.2689	6	1.4	6.6587	6.03675	5.87515	NaN	5.34883	5.58178	5.61287	5.64447	5.89831	5.67338	2	1	0	1	1	1	1	2	1	248.41
	TGVEG_223485;TGGT1_223485	hypothetical protein	HMM: MRVPGFPSLTFRADSLLVQCCIAACVWYGPQDAAAV, NN: MRVPGFPSLTFRADSLLVQCCIAA	0	NaN	NaN	NaN	22.2944	NaN	22.1874	22.9766	22.7412	NaN	0	NaN									15.915	12	38.7	7.47715	6.13197	6.12463	6.02284	6.69598	6.58502	6.72766	6.6613	6.76339	6.23631	1	1	1	2	2	2	2	3	1	10.307
	TGVEG_223510;TGME49_223510;TGGT1_223510	alpha/beta hydrolase family protein;hypothetical protein	N/A	0	NaN	NaN	NaN	NaN	NaN	NaN	NaN	NaN	18.8899	0	NaN									1.808	3	5.1	6.05706	NaN	NaN	NaN	NaN	NaN	5.85339	NaN	NaN	5.63032	0	0	0	0	0	1	0	0	1	49.409
	TGGT1_223540;TGVEG_223540;TGME49_223540	importin-beta N-terminal domain-containing protein	N/A	0	21.9314	21.8183	21.434	21.5796	22.3807	21.9828	21.8706	21.4437	22.1993	0.154855	-0.109939									20.664	37	14.7	7.48196	6.58302	6.42817	6.18136	6.42607	6.69685	6.72213	6.49556	6.3478	6.60577	5	4	4	5	5	6	5	5	5	122.22
	TGVEG_223590;TGME49_223590;TGGT1_223590	proteasome subunit	HMM: MKNYRCERFSCLLFACAVCPSTLR, NN: MKNYRCERFSCLLFACAVCPSTLRKHQVTFCGIWSRFELVVFAA;HMM: MKNYRCGRFSCLLFACAVCPSTLR, NN: MKNYRCGRFSCLLFACAVCPSTLRKHQVTFCGIWSRFELVVFAA	0	NaN	NaN	NaN	20.7147	20.8884	NaN	NaN	NaN	NaN	0	NaN									2.8908	10	8.4	6.96658	6.03366	6.06021	5.91998	6.20858	6.16888	5.99482	5.83389	5.88244	5.82831	1	1	1	2	2	1	1	1	1	39.396
	TGVEG_223810;TGME49_223810;TGGT1_223810	hypothetical protein;magnesium transporter NIPA	N/A	10	NaN	NaN	22.5028	NaN	NaN	NaN	NaN	NaN	NaN	0	NaN									1.602	9	2.6	7.94958	6.71033	6.4479	6.99652	6.60453	6.63462	7.54658	7.25365	6.6344	6.7326	2	1	1	1	1	1	1	1	1	136.88
	TGVEG_223920;TGGT1_223920;TGME49_223920;TGME49_327200	rhoptry neck protein RON3;rhoptry neck protein, putative	HMM: MTTSPRVAKWALRVLALVFLHHVTVCT, NN: MTTSPRVAKWALRVLALVFLHHVTVCT;HMM: QQTRHILPFGSLFPGGILGK, NN: QQTRHILPFGSLFPGGILGKIMQKLMRSYIMFFHPVLAN	1	23.8408	23.5529	23.4463	23.8759	23.7922	23.598	23.944	23.7592	23.813	0.801748	-0.225412									24.718	71	10.4	8.03671	7.17003	7.09527	6.94863	7.20804	7.03137	6.95525	7.07386	7.14073	7.04521	12	11	10	13	10	8	11	11	9	222.93
	TGVEG_224060;TGME49_224060;TGGT1_224060	putative thioredoxin;thioredoxin, putative	HMM: MAPRTSLALLALYALVSTSSHLLPDSFPPSFSSLSLSGVSAA, NN: MAPRTSLALLALYALVSTSSHLL	0	NaN	NaN	NaN	20.9445	21.031	21.0311	NaN	NaN	NaN	0	NaN									4.8358	9	12.4	7.02321	5.96922	6.04297	5.75658	6.2831	6.17464	6.40702	5.53747	5.86927	5.94965	3	2	2	2	2	2	1	2	2	68.947
	TGGT1_224310;TGVEG_224310;TGME49_224310	DHHC zinc finger domain-containing protein	N/A	4	20.1703	NaN	NaN	NaN	NaN	NaN	NaN	NaN	20.3613	0	-0.190964									7.4345	10	12.3	6.64225	6.06599	5.35081	5.9578	5.23345	5.17105	NaN	NaN	5.75951	6.07838	2	2	1	1	2	1	0	1	2	42.842
	TGVEG_224460;TGME49_224460;TGGT1_224460	aminopeptidase n, putative;putative aminopeptidase n	HMM: MVTLSATTMNATVSPCRISGGVSSRLCGWGVLSFLLASVITVQVSRAG, NN: MVTLSATTMNATVSPCRISGGVSSRLCGWGVLSFLLASVITVQVSRAG	0	23.0551	23.1402	22.6539	23.0613	22.9667	22.9777	22.6288	22.8863	23.0435	0.192887	0.096885									45.622	47	22.4	7.81774	7.0585	6.95348	6.7583	6.95147	6.69907	7.01774	6.69064	6.68307	6.739	9	8	8	9	9	9	6	5	6	108.75
	TGVEG_224470;TGGT1_224470;TGME49_224470	hypothetical protein	N/A	0	21.8858	21.5686	21.4949	NaN	NaN	NaN	NaN	NaN	NaN	0	NaN	+								12.019	13	16.8	7.04116	6.56732	6.57589	6.4717	5.10096	5.16673	5.47725	NaN	NaN	NaN	5	5	5	1	1	1	0	0	0	66.78
	TGVEG_224480;TGME49_224480;TGGT1_224480	cell-cycle-associated protein kinase CLK, putative;putative cell-cycle-associated protein kinase CLK	N/A	0	19.3337	NaN	NaN	NaN	NaN	NaN	NaN	NaN	NaN	0	NaN									2.7325	7	1.4	6.2546	5.82003	5.24841	NaN	5.00634	5.18825	5.27467	5.51038	NaN	5.28217	2	1	0	1	1	1	1	0	1	188.99
	TGVEG_224570;TGME49_224570;TGGT1_224570	hypothetical protein;putative transmembrane protein	N/A	8	16.7357	NaN	NaN	NaN	NaN	NaN	NaN	NaN	NaN	0	NaN									1.6963	1	3.7	5.03794	5.03794	NaN	NaN	NaN	NaN	NaN	NaN	NaN	NaN	1	0	0	0	0	0	0	0	0	63.234
	TGME49_224850;TGVEG_224850;TGGT1_224850	polyadenylate binding protein, putative;putative polyadenylate binding protein	N/A	0	24.0992	23.8734	24.2949	23.9948	23.7787	23.8806	24.1472	24.1041	23.6325	0.246787	0.127879									16.044	53	13.7	8.14085	7.39803	7.40295	7.34805	7.1495	7.0159	7.08558	6.97246	7.14706	6.75207	8	8	7	7	5	5	7	7	6	82.572
	TGVEG_225000;TGME49_225000;TGGT1_225000	enhancer of polycomb-like protein;hypothetical protein	HMM: MSPPSPSRAAASSVSSVRTSVSAR, NN: MSPPSPSRAAASSVSSVRTSVSAR	0	NaN	NaN	26.7412	NaN	NaN	NaN	NaN	NaN	NaN	0	NaN									2.3356	6	1	8.99811	8.42643	8.16453	7.97138	7.04029	6.74043	6.88624	7.88864	8.03623	8.44526	1	1	1	1	1	1	1	1	1	154.7
	TGVEG_225050;TGME49_225050;TGGT1_225050;TGME49_326800	adenosylhomocysteinase, putative;putative adenosylhomocysteinase;S-Adenosyl homocysteine hydrolase	HMM: DALLRSSVSWLSRRDARRSPWWCTVMALTWGEGA, NN: DALLRSSVSWLSRRDARRSPWWCTVMALTWGEGAGP;HMM: MRALFLSQESDGFLSPLCFLPGSPSSSF, NN: MRALFLSQESDGFLSPLCFLPGSPSSSFPHILQKRQPFLSLFLFAKTSQSRGR;N/A	0	24.3495	24.0618	24.009	24.3287	23.3839	23.7165	23.945	24.2663	24.2221	0.00988294	-0.00437927									16.787	39	20.9	8.14811	7.2793	7.27658	7.1825	7.33453	6.8476	7.20863	6.99587	7.19304	7.23495	6	7	6	5	3	5	4	5	5	64.084
	TGVEG_225080;TGME49_225080;TGGT1_225080	ribosomal protein RPS18	N/A	0	25.7858	25.8344	25.6754	25.7089	25.6863	25.5022	25.7188	25.5762	25.4229	0.922195	0.192539									13.252	44	53.2	8.63926	7.79641	7.85093	7.70297	7.64318	7.65938	7.73558	7.47576	7.52259	7.64886	7	7	7	6	6	7	5	6	6	17.722
	TGVEG_225280;TGME49_225280;TGGT1_225280	hypothetical protein	N/A	0	NaN	NaN	NaN	NaN	NaN	21.0245	NaN	NaN	NaN	0	NaN									1.8342	2	1.1	7.17394	NaN	NaN	NaN	NaN	NaN	6.37645	7.09854	NaN	NaN	0	0	0	0	0	1	1	0	0	281.81
	TGVEG_225290;TGME49_225290;TGGT1_225290	GDA1/CD39 (nucleoside phosphatase) family protein	HMM: MGMPVPALFHAALAAGTLTATARLTFPYVSQAE, NN: MGMPVPALFHAALAAGTLTATARLTFPYVSQAE	0	NaN	NaN	21.2669	NaN	NaN	NaN	NaN	NaN	NaN	0	NaN	+								1.3973	2	3.1	6.32346	NaN	NaN	6.32346	NaN	NaN	NaN	NaN	NaN	NaN	0	0	1	0	0	0	0	1	0	69.83
	TGVEG_225320;TGME49_225320;TGGT1_225320	hypothetical protein	HMM: MDLFCLLIGSFFFLSTSASAR, NN: MDLFCLLIGSFFFLSTSASAR	0	NaN	NaN	NaN	NaN	NaN	NaN	NaN	NaN	18.936	0	NaN									3.4519	4	3.4	6.36961	NaN	NaN	NaN	NaN	5.67688	5.59275	5.65596	5.76477	5.6442	0	0	0	0	1	1	1	1	1	54.438
	TGVEG_225550;TGME49_225550;TGGT1_225550	phosphatidylserine decarboxylase	HMM: MRSYLRFSDRHRQRPTRPRKRVICSSAHFICSRMSPAATAQ, NN: MRSYLRFSDRHRQRPTRPRKRVICSSAHFICSRMSPAATAQ;HMM: MRSYLRFSDRHRQRPTRSRKRVICSSAHFICSRMSPAATAQ, NN: MRSYLRFSDRHRQRPTRSRKRVICSSAHFICSRMSPAATAQ	0	NaN	NaN	NaN	NaN	NaN	NaN	23.0943	NaN	NaN	0	NaN									2.1808	4	8.4	7.01532	NaN	NaN	NaN	5.58398	5.3948	NaN	6.74579	5.50779	6.58389	0	0	0	1	1	0	2	1	1	48.384
	TGVEG_225560;TGME49_225560;TGGT1_225560	hypothetical protein	N/A	0	19.7689	19.9952	19.7865	19.061	18.6757	NaN	NaN	NaN	NaN	0	NaN									2.8495	6	2	6.60032	5.94323	6.03443	5.87204	5.70584	5.57024	5.60153	NaN	NaN	NaN	2	2	2	2	2	1	0	0	0	123.59
	TGVEG_225690;TGGT1_225690;TGME49_225690	hypothetical protein	N/A	0	22.6937	22.8574	23.7689	NaN	NaN	NaN	23.316	22.8533	22.8361	0.101997	0.104865									31.952	33	11.2	7.72174	6.82079	6.88854	7.13478	6.45257	6.2766	6.32471	6.78861	6.65195	6.85887	6	5	7	2	2	3	6	6	7	194.12
	TGVEG_225930;TGME49_225930;TGGT1_225930	triose-phosphate isomerase TPI-I	N/A	0	NaN	21.2416	NaN	NaN	NaN	NaN	NaN	NaN	NaN	0	NaN									4.2973	11	16.2	7.04751	6.16242	6.42575	5.94465	6.03775	5.95464	NaN	5.8784	6.29844	6.15253	1	2	1	1	1	0	2	1	1	27.89
	TGVEG_225940;TGME49_225940;TGGT1_225940	hypothetical protein	N/A	0	23.7676	23.7496	23.56	23.7165	23.7572	23.7085	23.6781	23.5279	23.5833	0.531283	0.0959765									9.525	21	20	8.01465	7.14013	7.16409	7.06028	6.84203	6.77495	6.92233	7.10216	7.14965	7.1905	3	3	3	2	2	2	5	5	5	33.734
	TGVEG_226020;TGME49_226020;TGGT1_226020	transporter, major facilitator family protein	N/A	12	NaN	NaN	20.2715	NaN	NaN	NaN	NaN	NaN	NaN	0	NaN									3.2428	7	3.4	6.96291	6.07584	6.05015	6.02379	6.00428	6.01703	5.96356	5.81109	6.15299	5.8881	1	1	1	1	1	1	1	1	1	64.569
	TGVEG_226380;TGGT1_226380	hypothetical protein;putative transmembrane protein	HMM: MYPLTVYSILAVVGLSLVCRGI, NN: MYPLTVYSILAVVGLSLVCRGIATE;HMM: MYPLTVYWILAVVGLSLVCRGI, NN: MYPLTVYWILAVVGLSLVCRGIATE	2	NaN	21.1556	NaN	21.0618	NaN	NaN	21.4582	21.7019	NaN	0	-0.424519									4.3868	12	7.1	7.06506	5.85543	6.39127	5.71486	6.29482	5.7145	NaN	6.26269	6.41739	5.99263	2	2	1	2	1	1	2	2	1	42.771
	TGVEG_226390;TGME49_226390;TGGT1_226390	hypothetical protein;PST-A-like protein	N/A	0	22.5637	22.8273	22.9421	23.0028	23.2411	22.7204	NaN	NaN	NaN	0	NaN	+								15.379	20	10.1	7.6638	6.6884	6.87456	6.77714	7.03579	6.85919	6.87899	5.84404	5.73827	5.92851	3	3	4	4	3	3	1	1	1	107.87
	TGME49_226410;TGGT1_226410;TGVEG_226410	EF-1 guanine nucleotide exchange domain-containing protein	HMM: MRAAAKSLPSRWSSVRLRCEKVPACFCATSSPPGGRST, NN: MRAAAKSLPSRWSSVRLRCE;N/A	0	23.9339	23.8133	23.7797	24.082	23.4828	23.5272	23.8043	23.8813	23.5892	0.352195	0.0840365									14.033	38	36.3	8.08796	7.1934	7.34825	7.14004	7.32013	6.99399	7.25633	6.94658	6.91027	6.69518	6	6	6	7	6	6	4	4	2	36.049
	TGVEG_226430;TGGT1_226430;TGME49_226430	reticulon protein	N/A	3	24.511	24.6122	24.6155	24.7981	24.6598	24.4732	25.2214	24.832	24.7097	1.01399	-0.341474									6.2157	23	28.6	8.33838	7.38108	7.45708	7.35326	7.4177	7.33478	7.40792	7.35319	7.35656	7.38151	3	4	4	3	3	3	4	4	3	21.592
	TGVEG_226570;TGME49_226570;TGGT1_226570	hypothetical protein	N/A	0	22.6518	22.6445	22.8476	22.8132	22.3342	22.3584	23.2204	22.5685	22.3849	0.0124908	-0.00990995									7.0257	16	22.3	7.7191	6.80426	6.85504	6.79645	6.84142	6.58222	6.77538	6.7992	6.67159	6.68696	2	2	2	2	2	2	2	2	2	14.996
	TGVEG_226590;TGME49_226590;TGGT1_226590	cytochrome C oxidase subunit IIa, putative;putative cytochrome C oxidase subunit IIa	HMM: MLAYFAASRELALVFCVGTTLPE, NN: MLAYFAASRELALVFCVGTTLPE;HMM: MLAYFAASRELAVVFCVGTTLPE, NN: MLAYFAASRELAVVFCV	1	18.4805	NaN	NaN	NaN	NaN	NaN	NaN	NaN	NaN	0	NaN									1.4266	3	3.7	6.14931	5.56318	NaN	NaN	NaN	NaN	6.01895	NaN	NaN	NaN	1	0	0	0	0	1	0	0	1	34.488
	TGVEG_226710;TGME49_226710;TGGT1_226710	hypothetical protein;putative transmembrane protein	HMM: MRFPASAASRPLLSLLALLLLANSRLAVAT, NN: MRFPASAASRPLLSLLALLLLANSRLAVAT	4;6	20.9619	20.8167	21.1754	NaN	NaN	NaN	NaN	NaN	NaN	0	NaN									4.1189	7	10.4	6.91778	6.33469	6.26795	6.29667	6.05568	NaN	NaN	6.05839	NaN	NaN	2	2	2	1	0	0	1	0	0	33.286
	TGVEG_226730;TGME49_226730;TGGT1_226730	aconitate hydratase ACN/IRP	HMM: MRILVPLVFLAAQIPPASLE, NN: MRILVPLVFLAAQIPPASLE	0	22.4595	22.5229	22.4666	22.9219	22.4344	NaN	23.2577	22.7933	22.4007	0.60255	-0.334284									16.029	30	18.4	7.68071	6.98666	7.00728	6.48027	6.75127	6.34331	5.70816	6.73853	6.75757	6.74023	6	8	6	6	4	2	4	6	6	114.87
	TGGT1_226830;TGVEG_226830;TGME49_226830	DnaK family protein	HMM: MALPAFEGVSPCVGGDRRVSPSGSSVRFSSHSSRLGCFFFAFCFLSVSLFSPLGAKAQ, NN: MALPAFEGVSPCVGGDRRVSPSGSSVRFSSHSSRLGCFFFAFCFLSVSLFSPLGAKAQ;HMM: MALPAFEGVSPCVGGDRRVSPSGSSVRSLSHSSRLGCFFFAFCFLSVSLFSPLGAKAQ, NN: MALPAFEGVSPCVGGDRRVSPSGSSVRSLSHSSRLGCFFFAFCFLSVSLFSPLGAKAQ;HMM: MALPAFEGVSPCVGGHRRVSPSGSSVRSLSHSSRLGCFFFAFCFLSVSLFSPLGAKAQ, NN: MALPAFEGVSPCVGGHRRVSPSGSSVRSLSHSSRLGCFFFAFCFLSVSLFSPLGAKAQ	0	20.9247	21.1368	21.2082	21.0204	NaN	NaN	20.9897	21.3139	NaN	0.136725	-0.0619043									8.277	10	7.1	7.11531	6.11998	6.18127	6.12882	6.47611	5.47709	5.94519	6.2284	6.3894	5.73416	2	2	2	4	1	1	2	2	1	104.93
	TGVEG_226960;TGME49_226960;TGGT1_226960	phosphofructokinase PFKII	N/A	0	26.3953	26.3378	26.1723	26.4461	26.4346	26.2468	26.5298	26.463	26.3968	0.981503	-0.161439									86.032	202	35.5	8.84549	7.96026	7.9768	7.80593	7.94832	7.77398	7.94258	7.80103	7.86302	7.89539	25	26	24	24	18	25	22	22	23	131.36
	TGVEG_226970;TGME49_226970;TGGT1_226970	ribosomal protein RPS11	N/A	0	24.8253	24.8176	24.8733	24.9285	25.1466	24.4438	24.8237	24.8964	24.3533	0.359568	0.147625									9.0219	38	40.4	8.36575	7.4479	7.57336	7.37621	7.52367	7.45475	7.28903	7.22183	7.39752	7.29848	4	4	4	5	4	3	3	4	4	18.677
	TGVEG_226980;TGME49_226980;TGGT1_226980	hypothetical protein;translation initiation factor eIF3 subunit	N/A	0	NaN	19.7872	20.2141	19.9873	19.7653	19.5984	20.036	20.0301	19.7431	0.112564	0.0641963									4.4663	8	14.5	6.87133	5.84933	5.98717	6.04309	5.95823	5.83704	5.89835	5.85825	5.8878	5.88825	1	2	2	2	2	2	2	2	2	25.324
	TGVEG_227030;TGME49_227030;TGGT1_227030	hypothetical protein	N/A	0	NaN	NaN	NaN	NaN	NaN	NaN	NaN	NaN	20.2988	0	NaN									2.6909	7	14.7	6.92908	NaN	NaN	NaN	6.25493	6.16486	6.23485	6.05281	6.09788	6.05446	0	0	1	1	1	1	2	1	1	18.687
	TGVEG_227280;TGGT1_227280;TGME49_227280	dense granule protein GRA3	HMM: MDRTICPFFIQSFTMSTALKRLIPFLVPFVVFLVAAALGGLAA, NN: MDRTICPFFIQSFTMSTALKRLIPFLVPFVVFLVAAALGGLAAD	2	26.0969	26.1957	26.6736	26.176	26.4652	25.909	27.2976	26.233	26.4792	0.400437	-0.347907									82.938	51	15.8	8.89361	7.77046	7.82604	7.90528	8.11687	8.10948	8.17785	7.86747	7.66462	7.66583	3	3	3	5	5	5	2	2	2	24.18
	TGVEG_227360;TGME49_227360;TGGT1_227360	ribosomal protein RPL3	N/A	0	25.6352	25.6438	25.7352	25.6085	25.5572	25.5331	26.0775	25.903	25.5498	0.47021	-0.172065									22.604	66	34.4	8.63284	7.69893	7.7208	7.63005	7.68676	7.61069	7.76075	7.61527	7.7211	7.63587	9	9	9	10	10	11	7	9	9	44.056
	TGVEG_227600;TGME49_227600;TGGT1_227600	ribosomal protein RPL34	N/A	0	25.0087	24.7858	24.8215	25.0184	24.8701	24.4278	25.1484	25.2394	24.7283	0.412086	-0.166683									2.4452	18	11.9	8.39159	7.52051	7.48518	7.39159	7.49017	7.36709	7.39844	7.40512	7.46966	7.37802	2	2	2	2	2	2	2	2	2	15.383
	TGGT1_227620;TGME49_227620;TGVEG_227620	dense granule protein GRA2	HMM: MFAVKHCLLVVAVGALVNVSVRAA, NN: MFAVKHCLLVVAVGALVNVSVRAA	0	26.8078	26.8608	26.8272	27.1017	26.8695	26.6309	27.6533	27.1629	26.8617	0.786401	-0.394014									13.349	49	30.3	9.03262	8.08458	8.13421	7.85308	8.24457	7.87722	7.9585	8.22261	8.10233	8.05526	5	5	3	6	4	5	5	6	6	19.842
	TGVEG_227948;TGGT1_227948;TGME49_227948	peptidase M16 inactive domain-containing protein	HMM: MRFSVVSAPMATPSTATGS, NN: MRFSVVSAPMATPSTATGS	0	23.1391	23.0802	23.1505	23.324	23.3106	22.8945	23.5362	23.2918	23.1029	0.666074	-0.187032									23.231	53	14.5	7.86573	6.79744	6.84286	6.81979	6.94001	6.85892	6.75509	6.9994	7.03342	7.04739	5	6	6	9	6	5	9	9	10	142.66
	TGVEG_227960;TGME49_227960;TGGT1_227960	PCI domain-containing protein	N/A	0	22.021	21.9995	21.9007	22.1296	22.042	21.7625	21.7181	21.7052	21.8146	1.96511	0.227779									11.973	28	16.2	7.50919	6.73206	6.81607	6.52289	6.66916	6.43924	6.44821	6.1719	6.27212	6.53666	5	5	4	5	4	4	3	3	4	55.682
	TGVEG_227970;TGME49_227970;TGGT1_227970	histone family DNA-binding protein	HMM: MQTLSLSLVLLVALSTSQ, NN: MQTLSLSLVLLVALSTSQ;HMM: MQTLSLSLVLLVVLSTSQ, NN: MQTLSLSLVLLVVLSTSQELLVAE	0	NaN	20.608	20.2218	NaN	NaN	NaN	NaN	NaN	NaN	0	NaN									3.9004	5	14	6.58285	NaN	6.25878	5.97571	5.74563	NaN	5.70755	NaN	NaN	NaN	0	2	2	1	0	1	0	0	0	25.14
	TGGT1_228170;TGVEG_228170;TGME49_228170	inner membrane complex protein IMC2A	HMM: MERRTRPDVSPRWQARRIHFVWLTALAVPIFLLFPSLSLLESTSSAGCSGIQCFASFPGVAAG, NN: MERRTRPDVSPRWQARRIHFVWLTALAVPIFLLFPSLSL	1	22.916	23.0679	22.8349	22.7883	22.7974	22.548	22.6788	22.6717	22.8266	1.18405	0.21391									17.009	43	8.6	7.76082	6.8455	6.8947	6.83514	6.81339	6.66307	6.84063	6.73111	6.75859	6.83248	5	5	5	5	4	6	6	6	7	182.33
	TGVEG_228190;TGME49_228190;TGGT1_228190	eukaryotic initiation factor-3, subunit 5, putative;putative eukaryotic initiation factor-3, subunit 5	N/A	0	22.5685	22.7143	22.6341	22.8092	22.1367	22.4704	22.2621	22.4259	22.775	0.409177	0.151302									12	35	29.8	7.69965	6.92862	7.00839	6.80577	6.70892	6.33991	6.69517	6.56953	6.46706	6.78551	6	6	6	4	3	4	4	4	4	38.069
	TGVEG_228210;TGME49_228210;TGGT1_228210	26S proteasome regulatory subunit	N/A	0	21.3902	21.3501	NaN	21.2626	21.5868	21.7345	NaN	NaN	21.0467	0	0.323439									4.6753	11	16.8	7.2915	6.35564	6.32383	6.24954	6.45033	6.51327	6.65344	5.85369	6.02715	6.02218	2	2	1	2	3	3	1	1	2	44.425
	TGVEG_228290;TGME49_228290;TGGT1_228290	phospholipase/carboxylesterase	N/A	0	20.8643	20.7779	19.7772	20.3524	20.403	20.5495	20.1126	20.2899	20.2462	0.295022	0.256905									6.6098	14	7.2	7.05204	6.26416	6.2667	5.91678	6.08063	6.05346	6.21016	5.91023	5.99775	5.99863	2	2	2	2	2	2	2	2	2	51.906
	TGVEG_228360;TGME49_228360;TGGT1_228360	peptidyl-prolyl isomerase FKBP12, putative;putative peptidyl-prolyl isomerase FKBP12	HMM: MQTRSASRAAAAAAAGVCGE, NN: MQTRSASRAAAAAAAGVCGEEASETE	1	NaN	NaN	NaN	NaN	21.708	20.9566	NaN	NaN	NaN	0	NaN									39.741	15	11.6	7.17035	6.34084	6.36118	6.14073	6.16602	6.43403	6.33439	5.98052	5.54814	6.10701	2	1	1	1	1	1	1	2	1	38.175
	TGVEG_228470;TGME49_228470;TGGT1_228470	ribosomal protein RPL15	N/A	0	25.158	25.116	25.3632	25.1996	24.102	25.5452	24.8552	25.321	25.3286	0.0901275	0.0441017	+								8.1627	47	29.3	8.46906	7.65657	7.57393	7.23709	7.32506	7.02453	7.55551	7.49989	7.64846	7.70412	5	5	3	3	3	3	5	6	6	24.325
	TGGT1_228750;TGVEG_228750;TGME49_228750	calcium dependent protein kinase CDPK7	N/A	0	24.3535	24.259	24.4156	24.4138	24.7531	24.4031	24.4418	24.3957	24.4128	0.712378	-0.0740242	+	+		+					95.432	94	10.4	8.26668	7.32607	7.39329	7.26302	7.3158	7.32738	7.40516	7.08888	7.22742	7.38074	10	9	8	7	8	10	7	8	9	219.32
	TGVEG_228760;TGME49_228760;TGGT1_228760	hypothetical protein	N/A	0	NaN	NaN	NaN	NaN	NaN	NaN	NaN	19.6782	NaN	0	NaN									2.2311	2	3.1	6.03104	NaN	NaN	NaN	NaN	NaN	NaN	5.64202	5.80318	NaN	0	0	0	0	0	0	1	1	0	49.276
	TGVEG_228770;TGGT1_228770;TGME49_228770	hypothetical protein	HMM: MTECFLFLFRRIMGASVSTARGTQVLSAVAVATGAAAI, NN: MTECFLFLFRRIMGASVSTARGTQVLSAVAVATGAAAI	0	27.9718	28.0272	28.2187	28.0889	28.1672	28.1151	28.3748	27.9904	27.9915	0.113505	-0.0463727									128.83	169	45.9	9.37843	8.44179	8.49633	8.42256	8.45228	8.34017	8.55612	8.32313	8.32732	8.39883	15	17	13	17	13	17	13	13	15	59.054
	TGVEG_229010;TGME49_229010;TGGT1_229010	rhoptry neck protein RON4	HMM: MAIKNTLTGSGLLVLLTLACGTTVQSS, NN: MAIKNTLTGSGLLVLLTLACGTTVQSS	0	NaN	NaN	NaN	NaN	NaN	NaN	NaN	21.5511	21.2272	0	NaN									5.0518	7	9.2	7	6.34217	6.11647	5.97454	NaN	NaN	NaN	5.98333	6.22583	6.46339	2	1	1	0	0	0	2	2	3	107.17
	TGME49_229030;TGGT1_229030;TGVEG_229030B;TGVEG_229030A	hypothetical protein;microsomal signal peptidase 25 kDa subunit	N/A	0;2	21.2465	NaN	NaN	NaN	NaN	NaN	NaN	NaN	NaN	0	NaN									3.2356	4	22.4	6.72728	6.39583	5.65008	NaN	NaN	NaN	NaN	NaN	6.0387	6.11691	2	1	0	0	0	0	0	1	1	25.424
	TGVEG_229180;TGME49_229180;TGGT1_229180	HEAT repeat-containing protein	N/A	0	23.6417	23.465	23.4284	23.7866	23.8972	23.725	23.489	23.4713	23.7861	0.226718	-0.0704085									54.039	104	26.8	8.01957	7.09639	7.23618	7.01561	7.05258	6.93278	7.14255	6.98401	7.0221	7.0269	13	15	12	10	10	12	12	14	13	136.16
	TGVEG_229250A;TGGT1_229250A;TGME49_229250	ribosomal protein RPL28	N/A	0	24.0463	24.0311	24.1503	24.4205	23.6277	23.7227	23.8028	23.8698	23.5906	1.6001	0.321499									45.355	48	60.8	8.12665	7.21617	7.29964	7.19485	7.25057	7.11341	7.22945	7.08686	7.10476	6.96018	5	5	5	5	4	5	5	5	4	8.3447
	TGME49_229360;TGGT1_229360;TGVEG_229360;TGVEG_439880	transaldolase	N/A	0	22.7518	22.8128	22.7031	22.9448	22.6957	22.2064	22.9476	23.2111	22.2822	0.0728502	-0.0577984									11.398	34	16.7	7.74214	6.77549	6.85596	6.7834	6.9372	6.58081	6.70143	6.73576	6.91857	6.6802	3	4	4	5	2	4	5	4	4	61.447
	TGVEG_229420;TGME49_229420;TGGT1_229420	cytochrome c, putative;putative cytochrome c	N/A	0	22.9062	22.8222	23.1279	22.8068	23.159	22.7348	23.3169	23.3782	22.9696	0.795242	-0.269477									7.8267	22	36.2	7.83202	6.96596	6.96324	6.95984	6.83655	6.82331	6.85989	6.76913	6.86945	6.80125	3	3	3	3	3	3	2	2	2	18.1
	TGVEG_229670;TGME49_229670;TGGT1_229670	ribosomal protein RPS23	N/A	0	24.6573	24.2988	23.9626	24.3166	24.3339	24.2188	23.8509	24.2137	23.8123	0.661397	0.347282	+								36.591	23	35.7	8.18977	7.39848	7.02164	7.30871	7.32713	7.3075	7.36333	6.87082	7.16062	7.0924	3	2	4	4	4	4	2	3	3	15.801
	TGVEG_229920;TGME49_229920;TGGT1_229920	hypothetical protein;putative transmembrane protein	HMM: MATTARQLFLPFAGMRPVGAA, NN: MATTARQLFLPFAGMRPVGAA	1	NaN	NaN	NaN	21.1241	20.4365	NaN	NaN	NaN	NaN	0	NaN									5.0424	9	17.6	7.10319	6.00548	6.0498	6.55479	6.32274	6.04258	6.16923	5.50327	5.9578	6.02197	1	2	2	2	2	2	1	2	2	34.951
	TGVEG_229950;TGME49_229950;TGGT1_229950	26S proteasome regulatory subunit 6b, putative;putative 26S proteasome regulatory subunit 6b	N/A	0	NaN	NaN	NaN	NaN	20.5929	20.3029	NaN	NaN	NaN	0	NaN									3.4764	6	14.7	6.59549	5.50759	5.58415	5.42284	5.54589	6.11945	6.11438	NaN	NaN	NaN	1	1	1	1	2	2	0	0	0	46.093
	TGVEG_229990;TGME49_229990;TGGT1_229990	putative T-complex protein 1 subunit alpha;T-complex protein 1 subunit alpha, putative	N/A	0	22.0739	21.9804	21.3015	21.9638	21.6774	22.0605	21.9384	22.4336	22.249	0.676754	-0.421737									19.867	32	23.9	7.53446	6.81819	6.7138	6.58677	6.52212	6.21307	6.62869	6.30784	6.66945	6.43173	7	6	7	5	4	5	5	7	4	59.215
	TGVEG_230160;TGME49_230160;TGGT1_230160	hypothetical protein	N/A	0	21.5688	21.3681	21.7396	NaN	NaN	NaN	21.9751	21.61	NaN	0.501557	-0.233746									3.7507	9	26.1	7.25032	6.42716	6.55201	6.42573	6.13293	5.86452	5.97137	6.43688	6.36541	5.90937	2	3	2	1	1	1	2	2	1	15.845
	TGVEG_230340;TGME49_230340;TGGT1_230340	hypothetical protein;putative high molecular mass nuclear antigen	N/A	0	NaN	19.6909	NaN	NaN	NaN	NaN	NaN	NaN	NaN	0	NaN									3.333	5	4.5	6.40204	NaN	5.95896	5.7805	5.81425	NaN	5.55465	NaN	NaN	NaN	0	2	2	2	0	1	0	0	0	102.52
	TGGT1_230350;TGVEG_230350;TGME49_230350	hypothetical protein;putative transmembrane protein	N/A	4;6	23.7947	23.5561	23.7828	23.7084	24.03	23.5804	23.953	23.9538	23.7283	0.706701	-0.167152	+								18.968	61	13.9	8.07664	7.20232	7.4036	6.96087	7.12548	6.98011	7.17155	6.7842	7.07972	7.11591	9	10	8	9	6	9	6	9	10	139.08
	TGVEG_230380;TGME49_230380;TGGT1_230380	protein translocation complex, SEC61 gamma subunit	HMM: MTRERAQRLLCRLLDFFLGCAALSFVTSLLFASVSSW, NN: MTRERAQRLLCRLLDFFLGCAAL	3	22.1133	22.0589	22.295	22.4687	22.2167	21.9657	NaN	NaN	22.1442	0	0.0114816									4.8332	15	28.9	7.57894	6.6726	6.68159	6.6222	6.75289	6.59895	6.64369	6.48287	6.55588	6.5509	2	2	2	2	2	3	1	1	2	16.8
	TGVEG_230410;TGME49_230410;TGGT1_230410	peroxiredoxin PRX3	N/A	0	NaN	NaN	21.2845	NaN	NaN	NaN	NaN	NaN	NaN	0	NaN									1.6392	3	4.2	6.87427	6.41076	6.44398	6.32875	NaN	NaN	NaN	NaN	NaN	NaN	1	1	1	0	0	0	0	0	0	30.534
	TGVEG_230420;TGME49_230420;TGGT1_230420	sarco/endoplasmic reticulum Ca2+-ATPase	N/A	7	24.2309	24.294	24.2585	24.3615	24.4725	24.0506	24.4277	24.1819	23.9238	0.221768	0.0833422									39.786	85	22.7	8.19822	7.32243	7.45205	7.22611	7.1827	7.09864	7.21101	7.22021	7.24279	7.13194	11	12	9	7	7	11	13	13	11	118.88
	TGVEG_230450;TGME49_230450;TGGT1_230450	bifunctional GMP synthase/glutamine amidotransferase protein	N/A	0	NaN	21.087	NaN	20.8614	NaN	NaN	NaN	NaN	NaN	0	NaN									3.4258	8	7.7	6.86328	5.99384	6.37451	6.0114	6.25142	NaN	6.05465	NaN	NaN	NaN	1	2	1	2	1	1	1	0	0	62.294
	TGVEG_230520;TGME49_230520;TGGT1_230520	cyclophilin 1, putative;putative cyclophilin 1	N/A	0	20.9127	20.7984	20.7346	21.5471	NaN	NaN	21.2132	20.8354	NaN	0.564155	-0.209026									5.4933	13	8	7.14323	6.29283	6.28504	6.17132	6.46624	5.96341	6.03997	6.17073	6.14173	5.85976	2	2	2	2	1	1	2	2	1	26.224
	TGGT1_230690;TGVEG_230690;TGME49_230690	LNS2 (Lipin/Ned1/Smp2) protein	N/A	0	21.9187	22.4004	22.217	21.7724	22.2799	22.0831	22.0819	22.0259	22.0666	0.354926	0.1206									12.861	21	7	7.54947	6.6017	6.73859	6.60899	6.44091	6.36754	6.65338	6.58527	6.62926	6.62329	4	5	5	5	4	4	5	5	4	167.9
	TGGT1_230850;TGVEG_230850;TGME49_230850	hypothetical protein;putative mucin	N/A	0	24.9118	24.9137	25.253	24.975	24.9916	24.9392	25.3621	24.9952	24.7408	0.0101048	-0.0065333									72.521	43	33.4	8.42229	7.4299	7.51143	7.62853	7.39803	7.31698	7.51691	7.49628	7.39983	7.43843	6	6	8	6	6	8	6	6	6	50.544
	TGME49_230940;TGGT1_230940;TGVEG_230940	hypothetical protein	N/A	0	NaN	NaN	NaN	NaN	NaN	NaN	NaN	20.1675	NaN	0	NaN									3.424	6	2.4	6.55514	5.75118	5.63546	NaN	5.75065	NaN	NaN	5.3376	5.95047	5.96451	1	1	0	1	0	0	1	2	2	155.05
	TGVEG_230960;TGME49_230960;TGGT1_230960	putative splicing factor 3b, subunit 3;splicing factor 3b, subunit 3, putative	N/A	0	21.1075	20.9007	20.511	21.0644	20.6964	20.3856	20.8859	20.7189	20.7987	0.0747236	0.0385895									8.6139	17	4	7.15342	6.29506	6.25631	6.13865	6.27214	6.05077	6.1087	6.20927	6.21617	6.18763	2	2	2	2	2	2	3	3	2	135.74
	TGVEG_231080;TGME49_231080;TGGT1_231080	ribosomal protein RPL38	N/A	0	NaN	NaN	21.3927	NaN	NaN	NaN	NaN	NaN	NaN	0	NaN									1.6675	6	11.9	7.33766	6.40792	6.52477	6.36133	6.49434	6.29842	6.45779	6.19885	6.30172	6.29959	1	1	1	1	1	1	1	1	1	9.5832
	TGVEG_231140;TGME49_231140;TGGT1_231140;TGVEG_232500;TGME49_232500;TGGT1_232500	hypothetical protein;ribosomal protein RPS25	N/A	0	23.0016	23.3605	NaN	23.1687	23.5219	23.212	23.086	23.2204	22.705	0.289307	0.177277									5.8586	18	18.6	7.84844	7.06915	7.0642	6.54715	6.98483	7.00238	6.73228	6.73433	6.86565	6.76514	3	2	2	3	3	2	2	2	2	18.682
	TGVEG_231160;TGME49_231160;TGGT1_231160	hypothetical protein	N/A	0	NaN	NaN	23.6585	NaN	NaN	NaN	NaN	NaN	NaN	0	NaN									5.5963	14	10.7	8.0887	7.12753	7.12248	7.0434	7.20793	7.1176	7.18783	7.126	7.16083	7.0944	1	1	1	1	1	1	1	1	1	18.281
	TGVEG_231190;TGME49_231190;TGGT1_231190	arsenite-activated ATPase family protein	N/A	0	NaN	18.7292	NaN	NaN	NaN	NaN	NaN	NaN	NaN	0	NaN									1.3921	5	2.5	6.53191	5.63252	5.66947	NaN	5.82509	5.53437	5.63653	5.63114	5.52399	5.47926	1	1	0	1	1	1	1	1	1	44.049
	TGVEG_231210;TGME49_231210;TGGT1_231210	sarcalumenin/eps15 family protein	N/A	0	NaN	NaN	NaN	NaN	NaN	NaN	NaN	NaN	19.1553	0	NaN									1.9661	2	4	6.16301	NaN	NaN	NaN	NaN	5.02674	5.92223	NaN	NaN	5.71021	0	0	0	0	1	1	0	0	1	65.562
	TGVEG_231410;TGME49_231410;TGGT1_231410	hypothetical protein	N/A	0	22.7082	22.8492	22.7233	22.7553	22.657	22.6694	23.171	22.8946	22.6745	0.436235	-0.153127									18.176	35	19.3	7.7572	6.80383	6.90066	6.73293	6.79746	6.70851	6.84228	6.77161	6.82567	6.81313	6	5	5	5	6	5	6	7	7	64.727
	TGGT1_231480;TGVEG_231480;TGME49_231480	GCN1, putative;putative GCN1	N/A	0	20.8286	20.6879	20.4337	20.7765	21.0491	20.3904	20.4449	20.558	20.9519	0.00253179	-0.00149028									15.834	23	4.5	7.12584	6.17038	6.11264	5.67379	6.41689	6.37566	6.16991	6.04379	5.93035	6.22763	4	3	3	5	5	3	4	3	5	362.65
	TGVEG_231600;TGME49_231600;TGGT1_231600	HEAT repeat-containing protein	N/A	0	22.7845	22.6669	22.7351	22.7962	22.9969	22.7073	22.8552	22.728	22.7004	0.214542	-0.0323626									71.327	47	15.1	7.75496	6.68305	6.85356	6.80463	6.81784	6.74761	6.97867	6.73317	6.73623	6.77815	6	6	6	7	6	8	6	6	7	128.09
	TGVEG_231630;TGME49_231630;TGGT1_231630	alveolin domain containing intermediate filament IMC4	N/A	0	28.5572	28.4205	28.897	28.338	28.5018	28.3243	28.6254	28.4758	28.2954	0.394162	0.159396									132.13	171	39.2	9.48384	8.58417	8.58697	8.62068	8.50705	8.45892	8.60442	8.38364	8.5025	8.45918	11	11	11	12	12	12	11	12	11	50.171
	TGVEG_231640;TGME49_231640;TGGT1_231640	alveolin domain containing intermediate filament IMC1	N/A	0	30.1309	30.1409	30.482	29.9107	29.8766	29.9141	29.9669	29.8841	29.7554	1.36585	0.382475									309.56	378	55.2	9.97076	9.11019	9.14724	9.13181	9.00013	8.88028	9.11684	8.81173	8.88959	8.90852	27	30	27	25	24	27	22	23	23	69.596
	TGVEG_231850;TGME49_231850;TGGT1_231850	serine-threonine phosophatase 2C (PP2C)	N/A	0	23.7551	23.827	23.9282	23.7769	23.6761	23.864	23.5304	23.5396	23.5235	2.42686	0.305621									22.325	52	43.5	8.04739	7.15812	7.26862	7.20718	7.05127	6.61032	7.14687	6.92513	6.99125	7.17298	7	9	8	6	5	6	9	7	9	36.79
	TGGT1_232030;TGVEG_232030;TGME49_232030	hypothetical protein	N/A	0	NaN	NaN	NaN	NaN	NaN	NaN	23.2127	23.4635	23.1441	0	NaN									7.036	15	20.2	7.7403	6.98495	6.94433	6.61098	6.45915	6.25188	6.48436	6.82837	6.97778	6.92949	2	1	1	1	1	1	3	3	3	23.393
	TGVEG_232050;TGME49_232050;TGGT1_232050	DnaJ domain-containing protein	N/A	2	21.8287	21.8738	21.6857	22.0286	21.813	21.685	21.4821	21.8696	21.6611	0.425949	0.125179									13.103	28	13.7	7.46789	6.60226	6.63454	6.42012	6.63127	6.52411	6.44279	6.31965	6.48266	6.4633	5	5	4	4	4	4	4	4	5	96.128
	TGGT1_232180;TGVEG_232180;TGME49_232180	UBA/TS-N domain-containing protein	N/A	1	17.8029	NaN	NaN	NaN	NaN	NaN	NaN	NaN	NaN	0	NaN									2.1445	2	2.6	6.09107	5.35919	4.76762	NaN	NaN	NaN	NaN	5.44773	5.36554	5.6372	2	1	0	0	0	0	1	1	1	206.85
	TGVEG_232230;TGME49_232230;TGGT1_232230	ribosomal protein RPL30	N/A	0	NaN	NaN	22.9448	NaN	NaN	NaN	NaN	NaN	NaN	0	NaN									18.225	6	21.3	7.1089	NaN	NaN	6.82854	NaN	NaN	NaN	6.1829	6.40254	6.3142	1	0	1	1	1	0	2	1	1	11.661
	TGVEG_232250;TGME49_232250;TGGT1_232250	catalase	N/A	0	24.4535	24.5572	24.3682	24.4877	24.3992	24.2864	24.8043	24.6515	24.3789	0.486419	-0.151884									34.299	72	32.7	8.28044	7.43329	7.49304	7.19251	7.37823	7.23646	7.31917	7.18904	7.253	7.33407	8	10	8	9	6	10	6	9	9	57.298
	TGVEG_232260;TGME49_232260;TGGT1_232260	hypothetical protein;putative transmembrane protein	N/A	3	NaN	NaN	NaN	21.3366	NaN	21.8636	NaN	NaN	NaN	0	NaN									4.7454	13	9.5	7.22115	6.3438	6.26043	6.34165	6.4522	6.29144	6.57906	NaN	5.88042	6.03056	1	1	1	2	2	2	1	2	2	32.342
	TGVEG_232300;TGME49_232300;TGGT1_232300	ribosomal protein RPS3	HMM: MLWFHSRREQGTHGGLLWLLCVCRLQ, NN: MLWFHSRREQGTHGGLLWLLCVCRLQTCK;HMM: MLWFHSRREQRTHGGLLWLLCVCRLQ, NN: MLWFHSRREQRTHGGLLWLLCVCRLQTCK	0	25.1264	25.2178	25.2217	25.5929	25.444	25.1494	25.2501	25.1122	24.9021	0.402043	0.100501									9.9628	30	28.2	8.50726	7.50376	7.59172	7.42839	7.68403	7.53624	7.74327	7.52419	7.40973	7.42506	3	3	3	4	4	5	4	3	3	28.736
	TGVEG_232350;TGME49_232350;TGGT1_232350	lactate dehydrogenase LDH1	N/A	0	27.3965	27.4066	27.2764	27.4435	27.1997	27.1068	27.6478	27.6433	27.2296	0.434985	-0.147069									110.4	187	86	9.154	8.28035	8.31374	8.15284	8.21051	8.0445	8.23827	8.10479	8.23373	8.15217	18	19	17	18	15	18	14	18	17	35.548
	TGVEG_232410;TGME49_232410;TGGT1_232410	PDI family protein	N/A	0	NaN	NaN	21.2249	NaN	NaN	NaN	NaN	NaN	NaN	0	NaN									2.915	9	16.4	7.03547	6.28963	6.27508	6.3108	6.48111	NaN	6.2334	NaN	NaN	5.3689	2	2	1	2	1	1	0	0	1	24.909
	TGVEG_232440;TGME49_232440;TGGT1_232440	Brf1p family coiled coil protein	N/A	0	NaN	NaN	NaN	NaN	NaN	NaN	NaN	NaN	19.6154	0	NaN									2.2392	2	6	6.71396	NaN	NaN	NaN	6.02177	5.72687	5.96321	5.66514	6.17722	5.84872	0	0	0	1	1	1	1	1	1	54.044
	TGVEG_232520;TGME49_232520;TGGT1_232520	brix domain-containing protein	N/A	0	NaN	NaN	NaN	NaN	NaN	NaN	NaN	NaN	20.3096	0	NaN									2.7821	1	5.2	7.09054	NaN	NaN	NaN	NaN	NaN	NaN	6.59858	6.85781	6.0577	0	0	0	0	0	0	1	1	1	43.251
	TGVEG_232660;TGGT1_232660;TGME49_232660	Hsp70 interacting protein HIP	N/A	0	21.9256	22.5196	22.187	22.5534	NaN	21.8668	22.1833	22.4125	22.0026	0.017881	0.0112375									7.616	11	13.4	7.5785	6.75818	6.93188	6.55945	6.69002	6.27012	6.56749	6.38473	6.57188	6.52798	3	4	2	2	1	2	2	2	2	45.158
	TGVEG_232710;TGME49_232710;TGGT1_232710	ribosomal protein RPS3A	N/A	0	26.7745	26.5049	26.6026	26.6808	26.6283	26.3032	26.7524	26.7384	26.3019	0.0616604	0.0297699									216.53	131	44	8.90878	8.06618	8.02469	7.88057	8.02666	7.80521	7.99949	7.88858	7.93427	7.89701	13	13	13	14	11	14	12	12	13	29.371
	TGVEG_232830;TGME49_232830;TGGT1_232830	putative vacuolar proton translocating ATPase subunit A;vacuolar proton translocating ATPase subunit A, putative	HMM: MTTLRSEPMLRGTLVLPSALPLAHGC, NN: MTTLRSEPMLRGTLVLPSALPLAHGC	6	NaN	NaN	NaN	NaN	NaN	NaN	22.9182	22.8444	22.8187	0	NaN									13.895	13	13.8	7.80233	7.14208	7.23381	7.0917	5.93032	6.00454	5.98819	6.66972	6.75371	6.83895	4	3	2	3	1	1	3	4	5	101.08
	TGGT1_233220;TGVEG_233220;TGME49_233220	hypothetical protein;putative transmembrane protein	HMM: MEQSAGVRRFFSNLSFICTTVALLLLASAGLPISASAE, NN: MEQSAGVRRFFSNLSFICTTVALLLLASAGL;HMM: MEQSAGVRRFFSNLSFIGTTVALLLLASAGLPISASAE, NN: MEQSAGVRRFFSNLSFIGTTVALLLLASAGLPISASAE	2	23.5224	23.7945	23.5433	23.6967	23.7389	23.4197	23.9765	23.8144	23.5881	0.534626	-0.172901									52.505	57	14	8.01753	6.93163	7.36476	7.05227	6.90821	6.93053	6.82463	7.11998	7.19429	6.95528	8	8	7	6	6	6	8	8	8	159.95
	TGVEG_233260;TGME49_233260;TGGT1_233260	GTP-binding protein, putative;putative GTP-binding protein	N/A	0	NaN	16.6862	NaN	NaN	NaN	NaN	NaN	NaN	NaN	0	NaN	+								1.9067	3	4.3	5.75812	5.27105	5.05442	NaN	5.13682	5.13325	NaN	NaN	NaN	NaN	1	1	0	1	1	0	0	0	0	43.26
	TGVEG_233350;TGME49_233350;TGGT1_233350	nuclear transport factor 2, putative;putative nuclear transport factor 2	N/A	0	NaN	NaN	20.1653	NaN	NaN	NaN	NaN	NaN	NaN	0	NaN									2.4652	6	10.4	6.90457	5.95217	6.12756	5.99185	5.92162	5.76292	5.99565	6.03981	5.822	5.80942	1	1	1	1	1	1	1	1	1	13.833
	TGVEG_233450;TGME49_233450;TGGT1_233450	SAG-related sequence SRS29A	N/A	1	22.7211	22.4393	22.3556	22.5345	22.1587	22.888	23.0435	23.0267	22.6089	1.01046	-0.387719									10.199	31	16.7	7.74565	6.86368	6.82298	6.60184	6.59289	6.29721	6.73865	6.94694	6.97717	6.9032	3	3	3	2	2	2	5	5	4	44.241
	TGGT1_233460;TGVEG_233460;TGME49_233460	SAG-related sequence SRS29B	HMM: MSVSLHHFIISSGFLASMFPKAVRRAVTAGVFAAPTLMSFLRCGAMAS, NN: MSVSLHHFIISSGFLASMFPKAVRRAVTAGVFAAPTLMSFLRCGAMAS;HMM: MSVSLHHFIISSGFLTSMFPKAVRRAVTAGVFAAPTLMSFLRCGVMAS, NN: MSVSLHHFIISSGFLTSMFPKAVRRAVTAGVFAAPTLMSFLRCGVMAS	0	30.5037	30.6985	30.7746	30.6849	30.8065	30.533	31.4236	31.1727	30.8202	1.17081	-0.479851									251.31	383	68.2	10.1964	9.16643	9.31252	9.20626	9.25176	9.2082	9.27602	9.2284	9.26982	9.24217	17	17	17	18	18	18	19	20	20	34.829
	TGGT1_233480;TGVEG_233480;TGME49_233480	SAG-related sequence SRS29C	HMM: MATRASLARQKTGAACLAVLTASPSVVAAK, NN: MATRASLARQKTGAACLAVLTASPSVVAAKPWKRWVGVSVILASAFAVGVSAG	0	27.4253	27.5178	27.6115	27.4997	27.5216	27.5281	28.2337	28.0628	27.8066	1.72516	-0.516136									52.545	93	29	9.24603	8.25324	8.35122	8.2629	8.25203	8.16409	8.33676	8.29383	8.36903	8.30728	5	6	6	5	6	6	6	6	7	39.215
	TGVEG_233520;TGME49_233520;TGGT1_233520;TGVEG_216950;TGME49_216950;TGGT1_216950	ATP-dependent RNA helicase;helicase	N/A	0	20.2867	20.15	19.4875	19.7258	20.2842	NaN	NaN	20.1211	20.203	0.222196	-0.187304									8.7786	17	5	6.88248	6.18021	5.94194	5.77134	6.05111	6.06092	5.53962	5.66204	5.88475	5.90373	3	3	2	3	3	1	1	2	2	88.864
	TGVEG_234190;TGME49_234190;TGGT1_234190	putative serine hydroxymethyltransferase 2;serine hydroxymethyltransferase 2, putative	N/A	0	22.9647	22.9517	22.8247	22.9632	22.0859	23.021	23.2201	23.2032	22.7081	0.30473	-0.130059									10.364	37	11.6	7.80114	6.88088	7.02338	6.92824	6.87924	6.18837	6.91672	6.80017	6.78125	6.83911	5	5	6	4	2	4	4	4	4	65.188
	TGVEG_234380;TGME49_234380;TGGT1_234380	hypothetical protein	N/A	0	21.3869	21.3576	NaN	21.4306	NaN	20.8192	21.3388	21.6038	20.7223	0.164016	0.150625									4.2771	14	6.3	7.25375	6.41951	6.50924	6.13248	6.40829	5.79234	6.31211	6.20669	6.37378	6.18081	2	2	2	2	1	2	2	2	2	38.654
	TGVEG_234450;TGME49_234450;TGGT1_234450	ribosomal protein RPS15A	N/A	1	24.2801	24.1574	23.9989	24.2591	24.1976	24.1769	24.2418	24.0617	23.8897	0.246063	0.0810496									10.841	28	28.1	8.17592	7.30311	7.35155	7.20569	7.32075	7.34211	7.37247	6.96213	7.02539	6.70461	4	5	5	6	6	6	3	3	3	26.589
	TGVEG_234505;TGME49_234505;TGGT1_234505	phenylalanyl-tRNA synthetase alpha chain A, putative;putative phenylalanyl-tRNA synthetase alpha chain A	N/A	0	20.6532	20.157	NaN	NaN	NaN	NaN	20.5279	20.1648	NaN	0.0623564	0.0586767									8.82	12	8.8	6.89963	6.34238	6.07551	6.08174	5.61598	5.59299	5.7158	5.90707	5.83393	5.7207	3	2	1	2	1	1	2	2	1	59.322
	TGME49_235020;TGGT1_235020;TGVEG_235020	COPI protein, putative;putative COPI protein	N/A	0	NaN	NaN	NaN	NaN	21.8953	NaN	22.4357	NaN	NaN	0	NaN									6.8566	9	3.4	7.20769	6.19965	6.23495	6.03181	6.12199	6.65716	6.18946	6.35978	6.08629	5.92057	2	1	1	1	3	2	2	1	1	137.06
	TGVEG_235130;TGME49_235130;TGGT1_235130	transmembrane protein	HMM: MFVLDPAAICCCAVTCCCGVGSVCAY, NN: MFVLDPAAICCCAVTCCCGVGSVCAY	0	21.8839	21.8665	21.7442	21.3945	22.1866	22.3561	21.6609	21.9007	21.7317	0.330489	0.0670821									9.9377	21	19.1	7.48401	6.5834	6.52834	6.38748	6.39545	6.5071	6.72235	6.49951	6.5421	6.50688	3	4	2	3	3	4	4	4	4	55.098
	TGVEG_235150;TGME49_235150;TGGT1_235150	transporter, major facilitator family protein	N/A	12	22.4187	22.4887	22.4011	22.449	22.3852	22.2895	22.6855	22.6194	22.7414	2.28976	-0.245981									79.152	36	24.3	7.66454	6.14333	6.20884	6.3951	6.72273	6.69918	6.74956	6.93594	6.89879	6.91622	5	4	5	4	4	3	6	6	6	60.553
	TGVEG_235160;TGGT1_235160;TGME49_235160	hypothetical protein	HMM: MSQDSSLNSMAGGAMFTGAVSAF, NN: MSQDSSLNSMAGGAMFTGAVSAFPSHAS	0	NaN	NaN	NaN	21.2676	21.3084	21.7162	NaN	NaN	NaN	0	NaN									11.351	16	7.4	7.18887	5.6972	6.1116	6.05975	6.49413	6.22902	6.52388	6.13226	5.61939	6.41194	1	2	2	5	3	4	3	1	5	168.09
	TGGT1_235340;TGVEG_235340;TGME49_235340	hypothetical protein	N/A	0	26.8513	26.8778	27.0518	26.7993	27.0704	26.7929	27.1106	26.9587	26.9135	0.318321	-0.0673218									111.43	276	57.1	9.02473	8.18298	8.22081	8.09293	7.96403	7.96976	8.03338	7.95818	8.03619	8.09089	27	28	26	23	21	24	25	28	27	76.653
	TGGT1_235470;TGVEG_235470;TGME49_235470	myosin A	N/A	0	26.4895	26.4943	26.6609	26.5397	26.5065	26.6313	26.4079	26.5935	26.6112	0.0423434	0.0106894									73.243	160	41.8	8.91315	8.0639	8.08863	8.02309	7.91777	7.72427	8.08048	7.74582	7.8697	7.94896	20	19	19	15	18	19	17	18	17	93.333
	TGGT1_235478;TGVEG_235478;TGME49_235478	pantothenate kinase	N/A	0;2	21.8269	21.8013	22.0355	21.7938	21.9005	21.9606	NaN	NaN	NaN	0	NaN	+								6.1721	19	3.2	7.36624	6.46064	6.57691	6.53964	6.53223	6.61422	6.65851	5.47311	5.43944	5.66794	2	3	3	3	4	3	1	1	1	176.28
	TGVEG_235540;TGME49_235540;TGGT1_235540	eukaryotic initiation factor-2 beta, putative;putative eukaryotic initiation factor-2 beta	N/A	0	NaN	21.215	21.5832	21.5271	NaN	NaN	NaN	21.4786	NaN	0	-0.079566									3.9853	13	14.3	7.2295	6.24314	6.42527	6.41709	6.44066	6.04591	6.0778	6.10951	6.34635	6.13494	2	2	2	2	1	2	1	2	2	26.233
	TGVEG_235690;TGME49_235690;TGGT1_235690	hypothetical protein	N/A	0	22.6277	22.032	22.3306	22.6612	22.374	22.4925	22.1927	22.7083	22.659	0.328466	-0.189849									5.6836	26	13.9	7.67701	6.70892	6.59342	6.61184	6.66276	6.52038	6.71864	6.75531	6.6078	7.06126	1	1	2	2	2	1	2	2	2	24.978
	TGVEG_235750;TGME49_235750;TGGT1_235750	ULK kinase	N/A	0	24.9844	24.8841	25.1612	25.0383	25.1864	24.9888	24.7327	23.9496	24.3821	1.27739	0.655105	+								30.979	45	21.8	8.41056	7.5274	7.54245	7.59575	7.56295	7.47186	7.72163	7.14947	6.75259	7.03181	8	7	8	7	6	7	4	3	3	41.224
	TGVEG_235970;TGME49_235970;TGGT1_235970	eukaryotic initiation factor-2 gamma, putative;putative eukaryotic initiation factor-2 gamma	N/A	0	23.6579	23.2717	23.5346	23.6572	23.4328	23.1978	23.413	23.7663	23.0538	0.119408	0.0770315									14.295	39	28	7.96125	7.17528	6.9464	6.8877	7.2179	7.0182	7.02596	6.82972	7.00595	6.73857	5	4	4	6	6	5	5	5	5	50.508
	TGVEG_236040;TGME49_236040;TGGT1_236040;TGME49_236050;TGVEG_236050;TGGT1_236050;TGME49_321900	fructose-1,6-bisphosphate aldolase;fructose-bisphosphate aldolase, putative;putative fructose-bisphosphate aldolase	N/A	0;1	27.2014	27.2074	27.2512	27.282	27.161	26.8182	27.5559	27.3768	26.9061	0.110954	-0.059576									89.776	146	41.6	9.10326	8.25268	8.29166	8.15585	8.15987	8.07306	8.20919	8.00617	8.05911	8.04076	14	13	13	14	14	16	14	14	14	46.96
	TGVEG_236210A;TGME49_236210;TGGT1_236210	peptidase M16 family potein, putative;putative peptidase M16 family potein	HMM: MMFRFLPRVASGASSLSVSQRRLRASFSSSLQSRGFFSAAPAAATAGVSPLARSVDAA, NN: MMFRFLPRVASGA	0	22.0307	21.8985	NaN	22.303	21.9952	22.4227	NaN	NaN	22.4638	0	-0.499171									8.9986	16	19.3	7.5422	6.64893	6.88572	6.40321	6.65779	6.46544	6.68221	6.26179	6.35522	6.58045	3	3	1	2	2	2	1	1	2	36.06
	TGGT1_236540;TGVEG_236540;TGME49_236540	RNA recognition motif-containing protein	N/A	0	NaN	21.9197	22.4389	21.5748	NaN	NaN	NaN	NaN	NaN	0	NaN									8.007	14	13.4	7.29818	5.84279	6.45814	6.49952	6.7668	6.33991	6.4965	5.81141	5.80806	5.83429	2	3	2	3	2	2	1	1	2	53.017
	TGGT1_236570;TGVEG_236570;TGME49_236570	lysine decarboxylase family protein	N/A	0	22.5462	22.4695	22.6967	22.8333	23.183	22.4279	22.9804	22.8461	22.5011	0.5799	-0.205055									11.398	45	23.2	7.74532	6.91941	6.92344	6.78593	6.79623	6.79168	6.65749	6.7124	6.7772	6.67209	6	7	5	5	4	5	6	6	5	43.956
	TGVEG_236650;TGME49_236650;TGGT1_236650	DEAD (Asp-Glu-Ala-Asp) box polypeptide 17	N/A	0	22.826	22.8728	22.7888	22.9701	22.3492	22.7845	23.0322	22.8153	22.5504	0.0742657	0.0299174									72.431	47	28	7.77991	6.86971	6.9841	6.89793	6.98497	6.35534	6.99329	6.55829	6.7232	6.66395	6	8	8	7	2	8	5	5	6	59.937
	TGVEG_236950;TGME49_236950;TGGT1_236950	hypothetical protein	N/A	0	23.4201	23.5183	24.0556	23.997	23.6004	24.4318	23.1804	23.9373	24.5457	0.193941	-0.223177									29.432	39	90.2	8.1378	7.20677	7.17102	7.2216	7.22178	7.01119	7.38975	6.9993	7.06232	7.22477	2	2	2	2	2	4	2	2	2	12.489
	TGVEG_236970;TGME49_236970;TGGT1_236970	SWI2/SNF2-containing PHD finger protein	N/A	0	NaN	NaN	17.5431	NaN	NaN	NaN	NaN	NaN	NaN	0	NaN	+								5.6451	4	0.7	6.2382	5.74115	5.62991	5.20246	5.23661	5.28292	5.36061	NaN	NaN	NaN	1	1	1	1	1	1	0	0	0	277.86
	TGVEG_237010;TGME49_237010;TGGT1_237010	hypothetical protein;putative Pb-reticulocyte-binding protein	N/A	0	NaN	NaN	NaN	19.0553	NaN	NaN	NaN	NaN	NaN	0	NaN									2.3786	1	2.3	5.70227	NaN	NaN	NaN	5.70227	NaN	NaN	NaN	NaN	NaN	0	0	0	1	0	0	0	0	0	71.919
	TGVEG_237015;TGME49_237015;TGGT1_237015	hypothetical protein;putative transmembrane protein	N/A	2	NaN	17.781	NaN	NaN	NaN	NaN	NaN	NaN	NaN	0	NaN									3.5357	3	7.2	6.13459	5.48703	5.38399	NaN	5.39761	4.88858	NaN	5.05721	5.10724	5.38911	1	1	0	1	1	0	1	1	1	29.315
	TGVEG_237150;TGGT1_237150;TGME49_237150	minor histocompatibility antigen h13, putative;putative minor histocompatibility antigen h13	N/A	8	NaN	NaN	NaN	NaN	NaN	NaN	NaN	22.3024	22.6041	0	NaN	+								5.8061	11	8.2	7.32379	NaN	6.16735	6.00126	6.19443	6.00017	6.46479	6.56677	6.64968	6.69644	0	1	1	3	2	1	1	2	2	46.228
	TGVEG_237220;TGME49_237220;TGGT1_237220	DNA replication licensing factor Mcm7, putative;putative DNA replication licensing factor Mcm7	N/A	0	20.1375	19.7589	NaN	20.2074	NaN	NaN	NaN	NaN	NaN	0	NaN									4.3916	7	5.3	6.67302	5.92768	6.10254	NaN	6.05484	NaN	5.79495	5.69599	5.53439	NaN	2	3	0	2	0	1	1	1	0	96.758
	TGVEG_237870;TGME49_237870;TGGT1_237870	FYVE zinc finger domain-containing protein	N/A	0	NaN	NaN	20.998	NaN	NaN	NaN	NaN	NaN	NaN	0	NaN									5.4774	7	11.6	6.68891	6.04899	NaN	6.24252	NaN	NaN	5.98532	6.02177	NaN	NaN	2	0	2	0	1	2	1	0	0	57.069
	TGVEG_237880;TGME49_237880;TGGT1_237880	hypothetical protein;putative transmembrane protein	HMM: MLHHSVCFCSARGFIPAMRKFTIVAVVVFALLGCVSWQESAFVRGA, NN: MLHHSVCFCSARGFIPAMRKFTIVAVVVFALLGCVSWQ;HMM: MLHHSVCFCSARGFIPAVRKFTIVAVVVFALLGCVSWQESAFVRGA, NN: MLHHSVCFCSARGFIPAVRKFTIVAVVVFALLGCVSWQ	1	NaN	NaN	NaN	NaN	NaN	21.6123	NaN	NaN	NaN	0	NaN									4.019	10	29.3	7.41657	6.37221	6.35784	6.39387	6.53481	6.345	6.5534	6.45437	6.66471	6.36178	1	1	2	1	1	2	2	2	1	18.139
	TGME49_237890;TGGT1_237890;TGVEG_237890	calcium-dependent protein kinase CDPK4	N/A	0	22.1464	22.3268	22.6368	22.193	22.7922	22.2362	22.0223	NaN	21.6734	0.982876	0.522168	+								22.431	46	15.1	7.58883	6.6097	6.76925	6.63606	6.72496	6.83416	6.94903	6.11691	5.87796	6.15676	4	7	5	5	6	7	2	2	2	126.33
	TGVEG_238010;TGME49_238010;TGGT1_238010	ribosomal protein RPL23A	N/A	0	23.5571	23.5221	23.4564	23.6436	23.1659	22.6217	23.7414	23.8638	22.8337	0.0333174	0.0321859									8.265	20	20.4	7.94456	7.06763	7.08279	6.95168	7.05446	6.85277	6.8356	6.90742	7.12424	6.93359	2	2	2	2	2	2	2	3	3	18.561
	TGVEG_238050;TGME49_238050;TGGT1_238050	nuclease and tudor domain-containing protein	N/A	0	23.7493	23.7109	23.574	23.8154	23.5903	23.6405	23.9261	23.8625	23.538	0.301442	-0.0974623									43.319	95	28.5	8.04497	7.15488	7.22688	7.06811	7.14789	6.9846	7.2229	6.96921	7.0133	6.90422	13	14	13	13	11	13	13	11	9	104.04
	TGVEG_238100;TGME49_238100;TGGT1_238100	transmembrane protein	HMM: MALPRSTQTPRGSTACRLAFFVAFFWASFAG, NN: MALPRSTQTPRGSTACRLAFFVAFFWASFAG;HMM: MALPRSTRTPRGSTACRLAFFVAFFWASFAG, NN: MALPRSTRTPRGSTACRLAFFVAFFWASFAG	2	NaN	NaN	21.5023	NaN	NaN	NaN	NaN	NaN	NaN	0	NaN									1.5352	5	4.2	7.14142	6.07809	6.55919	6.52466	6.14669	5.9664	5.84699	5.90055	6.07162	5.82987	1	1	1	1	1	1	1	1	1	26.92
	TGVEG_238150;TGME49_238150;TGGT1_238150	hypothetical protein;putative transmembrane protein	N/A	8	24.652	24.6094	24.6941	NaN	NaN	24.5336	25.1674	24.8754	24.6061	0.635819	-0.231135	+	+		+			+		8.063	19	13.2	8.2693	7.42998	7.31633	7.23827	6.95464	6.95502	7.40506	7.48585	7.44394	7.28176	3	3	3	1	2	2	4	4	3	37.062
	TGVEG_238180;TGME49_238180;TGGT1_238180	26s proteasome regulatory complex subunit, putative;putative 26s proteasome regulatory complex subunit	N/A	0	21.9337	NaN	NaN	NaN	NaN	NaN	NaN	NaN	NaN	0	NaN									3.8988	10	7.7	7.23073	6.60271	6.41155	6.11474	6.33903	6.12149	6.27344	6.04774	6.08228	6.15091	2	1	1	1	1	1	1	1	2	47.55
	TGVEG_238250;TGME49_238250;TGGT1_238250	ribosomal protein RPL36	N/A	0	28.2998	28.3915	28.8755	28.3657	28.8397	28.2799	28.9443	28.3469	28.0919	0.0691758	0.0612297									27.718	48	30.7	9.47201	8.42418	8.62972	8.54029	8.4643	8.51005	8.51561	8.69813	8.39071	8.37738	4	3	4	5	5	5	5	5	5	11.407
	TGVEG_238950;TGME49_238950;TGGT1_238950	fatty acyl-CoA desaturase, putative;putative fatty acyl-CoA desaturase	HMM: MALLTEIAALWVRDLLRRTLGG, NN: MALLTEIAALWVRDLLRRTLGG	14	22.7581	22.7666	22.8619	22.6928	22.9059	22.5358	23.1418	22.8947	22.6423	0.262581	-0.0974331									15.037	39	7.5	7.76105	6.85243	6.87393	6.77198	6.79505	6.64545	6.81787	6.73962	6.875	6.8417	5	5	4	5	5	5	4	6	6	117.09
	TGVEG_239100;TGME49_239100;TGGT1_239100;TGVEG_312510;TGME49_312510;TGGT1_312510	Ku70/Ku80 beta-barrel domain-containing protein;ribosomal protein RPS7	HMM: MALPGQSFKRVIVLLLDCGATMQQ, NN: MALPGQSFKRVIVLLLDCGATMQQ;N/A	0	25.5086	25.4916	25.3092	25.6842	25.1263	25.4117	25.4349	25.6038	25.091	0.134791	0.059899									22.747	84	62.2	8.56299	7.80575	7.76594	7.58016	7.61301	7.56842	7.60844	7.48202	7.5704	7.28147	11	9	10	9	8	9	8	9	10	22.587
	TGVEG_239260;TGME49_239260;TGGT1_239260	histone H4	N/A	0	28.6623	28.7779	29.2301	28.8803	28.0391	28.1317	28.8322	28.7518	28.1548	0.491972	0.310511									35.297	70	51.5	9.53113	8.6578	8.70617	8.61944	8.66443	8.30976	8.59366	8.51073	8.57122	8.41979	6	6	6	5	5	6	5	5	4	11.439
	TGVEG_239400;TGME49_239400;TGGT1_239400	hypothetical protein	N/A	0	NaN	NaN	NaN	NaN	NaN	NaN	NaN	NaN	20.4167	0	NaN									5.3308	9	4.5	6.78923	5.77503	5.81276	5.90937	5.8673	5.80083	5.75272	5.66123	5.67638	6.08994	1	2	2	1	1	1	1	1	2	133.89
	TGVEG_239490;TGME49_239490;TGGT1_239490	dehydrogenase E1 component family protein	N/A	0	NaN	NaN	20.6805	NaN	NaN	NaN	NaN	NaN	NaN	0	NaN									2.4746	7	2.5	7.22497	6.24873	6.2772	6.14693	6.47125	6.13059	6.17257	6.30309	6.44226	6.05751	1	1	1	1	1	1	1	1	1	63.914
	TGVEG_239500;TGME49_239500;TGGT1_239500	proteasome subunit alpha type, putative;putative proteasome subunit alpha type	N/A	0	NaN	NaN	20.4902	NaN	NaN	NaN	NaN	NaN	NaN	0	NaN									4.4011	13	11.1	7.10829	6.30878	6.31927	6.08966	6.24291	6.15836	6.08753	6.04234	6.04021	5.93906	2	2	2	1	1	1	2	1	1	27.936
	TGGT1_239530;TGVEG_239530;TGME49_239530	alanine-glyoxylate aminotransferase	N/A	0	22.2939	22.0436	22.0195	22.3435	NaN	21.542	21.9664	22.4601	21.7292	0.103919	0.0671069									7.857	20	11	7.51776	6.72706	6.69546	6.55757	6.71465	5.99964	6.56005	6.3862	6.56024	6.49943	3	3	3	3	2	3	3	2	3	41.811
	TGVEG_239710;TGME49_239710;TGGT1_239710	phosphomannomutase	N/A	0	NaN	NaN	NaN	NaN	NaN	NaN	17.6303	NaN	NaN	0	NaN									2.5949	1	12	5.86504	5.49454	5.46901	NaN	NaN	NaN	NaN	5.10092	NaN	NaN	1	2	0	0	0	0	1	0	0	28.674
	TGGT1_239740;TGVEG_239740;TGME49_239740	dense granule protein GRA14	HMM: MQAIARGDRSSGWSSCSWLFYFSFLLLTSEAVAAAA, NN: MQAIARGDRSSGWSSCSWLFYFSFLLLTSEAVAAA	0	22.1023	22.3762	21.9739	22.1563	22.062	21.7619	22.5636	22.6518	21.6329	0.140862	-0.131936									6.3905	25	14	7.57709	6.61019	6.94054	6.71283	6.66238	6.53245	6.38045	6.38128	6.72584	6.22451	3	5	4	4	4	3	2	3	2	44.753
	TGVEG_239760;TGME49_239760;TGGT1_239760	ribosomal protein RPL22	N/A	0	NaN	23.7844	23.8125	NaN	NaN	NaN	NaN	NaN	23.5852	0	0.213256									6.2362	14	21.1	7.81137	6.82095	7.1907	7.07686	6.66607	6.66006	6.63616	6.38086	6.51941	7.059	2	2	2	2	1	2	1	1	2	15.073
	TGVEG_239800;TGME49_239800;TGGT1_239800	amine-terminal region of chorein, A TM vesicle-mediated sorter;hypothetical protein	N/A	0	21.4113	21.4994	21.3648	21.7163	NaN	21.0489	21.6828	20.8835	21.3957	0.1661	0.104494									5.4007	13	22	7.28119	6.52251	6.32824	6.24452	6.45948	5.48153	6.20011	6.5459	6.36386	6.11271	3	2	2	2	1	2	3	4	2	34.073
	TGVEG_239820;TGME49_239820;TGGT1_239820	D-3-phosphoglycerate dehydrogenase	N/A	0	21.9849	21.7573	21.5575	21.8215	22.2893	21.9158	22.0445	21.5954	21.798	0.0915989	-0.0460517									13.332	27	15.7	7.49432	6.67417	6.69707	6.43973	6.52577	6.55432	6.66977	6.4078	6.37138	6.34945	5	5	4	3	3	4	3	3	2	65.193
	TGVEG_239890;TGME49_239890;TGGT1_239890	SCP family extracellular subfamily protein	HMM: MANKAVLALALLLCVASSALVQST, NN: MANKAVLALALLLCVASSALVQST	1	22.7311	22.4464	NaN	22.7647	21.7469	22.5321	22.9636	23.0561	NaN	0.972531	-0.421078									25.463	21	22.8	7.68078	6.84598	6.75751	6.68181	6.77935	6.20099	6.82641	6.64064	6.97092	6.37524	2	2	1	3	2	3	4	4	3	26.623
	TGGT1_240060;TGVEG_240060;TGME49_240060	hypothetical protein	N/A	0	NaN	19.841	NaN	NaN	NaN	NaN	NaN	NaN	NaN	0	NaN									3.1252	4	4.6	6.32762	NaN	6.00415	NaN	NaN	NaN	5.8083	NaN	NaN	5.67538	0	2	0	0	0	1	0	0	1	88.786
	TGVEG_240280;TGME49_240280;TGGT1_240280	S1/P1nuclease	HMM: MKRTRSTAAGLVLCLLCGSSLISCAQAF, NN: MKRTRSTAAGLVLCLLCGSSLISCAQAF	1	NaN	NaN	NaN	NaN	NaN	19.9401	NaN	NaN	NaN	0	NaN									3.7041	3	6.2	6.70234	5.76312	5.94728	5.73292	NaN	NaN	6.04999	5.82506	5.82531	5.75863	1	1	1	0	0	1	1	1	1	48.523
	TGVEG_240500;TGME49_240500;TGGT1_240500	hypothetical protein;PITH domain protein	N/A	0	NaN	NaN	NaN	NaN	NaN	NaN	NaN	NaN	18.809	0	NaN									1.7626	3	8.2	5.91961	NaN	NaN	NaN	NaN	NaN	NaN	NaN	5.63085	5.60596	0	0	0	0	1	1	0	1	1	32.035
	TGGT1_240570;TGVEG_240570;TGME49_240570	hypothetical protein;putative transmembrane protein	N/A	4	23.764	23.7335	23.6189	23.5271	24.1383	23.8572	23.9239	23.6291	23.9624	0.510489	-0.133026									45.004	55	27.8	8.06718	7.13258	6.99336	7.054	7.20205	7.23091	7.27962	6.97041	7.01072	7.01758	7	7	6	8	7	9	6	8	6	57.402
	TGVEG_240600;TGME49_240600;TGGT1_240600	chaperonin cpn60, putative;putative chaperonin cpn60	N/A	1	22.5599	22.2818	22.3242	22.1017	22.6474	23.1973	22.4547	22.3286	23.0482	0.393385	-0.221878									12.532	26	15	7.70722	7.04198	6.92987	6.97231	6.55234	6.41636	6.68382	6.53442	6.734	6.34355	5	5	3	3	2	3	2	3	2	72.236
	TGVEG_240650;TGME49_240650;TGGT1_240650	coatomer protein complex, subunit alpha, putative;putative coatomer protein complex, subunit alpha	N/A	0	22.196	22.0073	21.4892	21.9705	21.9898	22.0486	21.9035	21.7801	21.4407	0.30537	0.189404									19.506	27	12.8	7.50807	6.74957	6.80527	6.25161	6.58065	6.44632	6.75515	6.36959	6.24966	6.3043	6	6	3	6	5	5	3	3	4	142.95
	TGVEG_240810;TGME49_240810;TGGT1_240810	hypothetical protein;putative transporter	N/A	10	22.3186	22.0431	22.3354	NaN	NaN	NaN	NaN	NaN	NaN	0	NaN									3.5223	12	5.7	7.37302	6.64845	6.69617	6.68283	6.54273	5.57653	6.58807	5.36961	5.75419	5.91781	2	2	2	2	1	2	1	1	1	61.262
	TGVEG_240860;TGME49_240860;TGGT1_240860	acyltransferase domain-containing protein	HMM: MASTPLRVLMTIYFYLVVSVFFLLAFLTELA, NN: MASTPLRVLMTIYFYLVVSVFFLLAFLTELAELV	1	NaN	NaN	NaN	NaN	NaN	NaN	NaN	NaN	20.0194	0	NaN									3.3932	1	6.8	6.49987	NaN	NaN	NaN	NaN	NaN	NaN	6.0992	5.98709	5.97034	0	0	0	0	0	0	1	1	1	31.851
	TGVEG_240870;TGME49_240870;TGGT1_240870	beta adaptin protein, putative;putative beta adaptin protein	N/A	0	NaN	20.3933	20.2242	20.3657	20.0232	20.7582	20.5704	20.3799	20.444	0.6943	-0.156003									5.5741	13	5.2	7.00552	5.70123	6.09036	5.93991	6.02288	5.83632	6.21005	6.02247	6.11451	6.25686	1	2	2	2	2	2	2	3	3	101.96
	TGVEG_241000;TGME49_241000;TGGT1_241000	hypothetical protein;putative transmembrane protein	N/A	4	NaN	NaN	22.7273	22.7321	23.0447	NaN	23.0023	22.8714	22.964	0	-0.218587									82.645	12	24.9	7.67317	6.56533	6.63733	6.73387	6.73035	6.75059	6.38158	6.80112	6.80872	6.87544	1	1	2	2	2	1	3	3	3	25.401
	TGVEG_241170;TGME49_241170;TGGT1_241170	hypothetical protein;KH domain protein	HMM: MAAAATLLAVSPPGDFSH, NN: MAAAATLLAVSPPGDFSHSK	0	20.5017	20.062	19.6746	20.5708	20.2677	20.5627	19.9074	20.1361	20.1209	0.0332733	0.0246423									10.403	17	9	6.9795	5.95805	6.23568	5.81436	6.047	5.83881	5.81721	6.05926	6.08643	6.1557	3	4	5	4	3	2	3	3	3	139.69
	TGGT1_241820	putative membrane protein	N/A	7	NaN	NaN	20.4465	NaN	NaN	NaN	NaN	NaN	NaN	0	NaN									3.0312	6	5.5	7.123	6.05827	6.17178	6.07649	6.12581	6.17823	6.30803	6.26418	6.20339	6.05763	1	1	1	1	1	1	1	1	1	30.918
	TGVEG_242290;TGME49_242290;TGGT1_242290	proteasome subunit alpha1, putative;putative proteasome subunit alpha1	N/A	0	NaN	21.9081	NaN	22.1872	NaN	NaN	21.4767	NaN	21.0876	0	0.626008									4.7927	13	14.6	7.31429	6.29228	6.62832	6.1344	6.64665	6.06198	6.41256	6.2647	6.05835	6.27713	1	3	1	2	1	2	2	1	2	28.114
	TGVEG_242330;TGME49_242330;TGGT1_242330	ribosomal protein RPS5	N/A	0	25.4773	25.2866	25.1148	25.3985	25.2601	25.204	24.961	25.2967	25.0679	0.5686	0.184336									16.082	59	58.3	8.52567	7.68887	7.69099	7.53019	7.70228	7.52411	7.69976	7.28196	7.37096	7.43303	8	8	7	7	7	7	7	6	7	21.613
	TGGT1_242625;TGVEG_242625;TGME49_242625	ATPase family associated with various cellular activities (AAA) subfamily protein	HMM: MASESSSVAADIAAALLPLVRAL, NN: MASESSSVAADIAAALLPLVRAL	0	NaN	NaN	20.7751	NaN	NaN	NaN	NaN	NaN	NaN	0	NaN									1.6797	4	0.1	7.05216	5.96804	6.07617	6.1754	6.11554	6.10639	6.08041	6.01242	6.00368	6.2634	1	1	1	1	1	1	1	1	1	976.2
	TGVEG_242660;TGME49_242660;TGGT1_242660	putative vacuolar sorting protein 35;vacuolar sorting protein 35, putative	N/A	0	22.023	21.5109	21.8524	21.7927	21.9584	21.824	NaN	NaN	NaN	0	NaN									20.261	14	14.4	7.33112	6.64795	6.5008	6.54899	6.5056	6.5146	6.54103	NaN	NaN	5.5214	5	4	3	4	5	5	1	0	1	95.635
	TGVEG_243200;TGME49_243200;TGGT1_243200	hypothetical protein	N/A	0	NaN	19.9934	19.9265	NaN	NaN	19.8636	NaN	NaN	NaN	0	NaN									6.114	14	2.8	6.84535	5.67333	6.09729	5.92062	6.17026	6.10524	5.9678	5.56251	5.22917	5.36403	2	3	2	2	2	2	1	2	2	133.45
	TGVEG_243570;TGME49_243570;TGGT1_243570	ribosomal protein RPS26	N/A	0	23.6593	23.5183	23.2883	NaN	NaN	NaN	23.3518	23.9469	22.9573	0.0803588	0.0699507									3.531	9	18.8	7.88447	7.09475	7.11836	6.98134	6.8957	6.62799	6.60843	6.87637	7.05034	6.81755	2	2	2	1	1	1	2	2	2	12.725
	TGVEG_243580;TGME49_243580;TGGT1_243580	Hit family protein involved in cell-cycle regulation, putative;putative Hit family protein involved in cell-cycle regulation	HMM: MLPTRCLKFVTLSTAMLSLQTPRLSAF, NN: MLPTRCLKFVTLSTAMLSLQTPRLSAF	0	NaN	20.7816	20.4643	NaN	NaN	NaN	NaN	NaN	NaN	0	NaN									4.3114	10	13.8	7.0204	6.05725	6.2927	6.07504	6.0593	5.93213	6.29447	5.85891	5.98037	5.73222	1	2	2	1	1	1	1	1	1	30.516
	TGVEG_243710;TGME49_243710;TGGT1_243710	t-complex protein beta subunit	N/A	0	23.1261	23.3713	23.2039	23.1257	23.1331	22.8526	23.0788	23.1904	22.7515	0.687001	0.226868									20.473	49	33.3	7.85762	6.99902	7.0667	6.93428	6.94338	6.84772	6.94814	6.74705	6.84379	6.65865	8	8	7	8	7	8	6	7	6	61.472
	TGVEG_243730;TGME49_243730;TGGT1_243730	rhoptry protein ROP9	HMM: MTHPNPLQTRFSRSASLVSRMPLVRLFFTIAAPLLFSPSPCP, NN: MTHPNPLQTRFSRSASLVSRMPLVRLFFTIAAPL;HMM: MTHPNPLQTRFSRSASLVSRMPLVRLFFTIAAPLLFSPSPFPFLPLKTHCLAI, NN: MTHPNPLQTRFSRSASLVSRMPLVRLFFTIAAPL	0;1	22.5114	22.4204	21.7704	22.1438	22.1931	22.4644	21.6677	22.4154	21.9813	0.26682	0.212592									11.667	30	22.1	7.59812	6.73079	6.74488	6.42899	6.70499	6.4828	6.91199	6.35801	6.63248	6.50109	3	5	3	4	3	4	3	4	3	37.701
	TGVEG_243920;TGME49_243920;TGGT1_243920	DNA replication licensing factor MCM5, putative;putative DNA replication licensing factor MCM5	N/A	0	NaN	NaN	NaN	NaN	NaN	18.8317	NaN	NaN	NaN	0	NaN									2.1191	1	1.8	6.25365	NaN	NaN	NaN	5.81862	5.78835	5.71635	NaN	NaN	NaN	0	0	0	1	1	1	0	0	0	88.211
	TGVEG_243930;TGME49_243930;TGGT1_243930	hypothetical protein	HMM: MRQFLPLLVLLPLLQRQDSAA, NN: MRQFLPLLVLLPLLQRQDSAA	0	22.5579	22.4355	22.6505	22.3016	22.3342	22.4862	23.1319	22.6225	22.6752	0.687681	-0.261899									12.749	23	10.4	7.70748	6.62308	6.61601	6.75284	6.88494	6.73937	6.84028	6.69646	6.87651	6.64554	4	4	3	3	4	4	2	3	4	101.35
	TGVEG_243960;TGME49_243960;TGGT1_243960	nuclear transport factor 2 (ntf2) domain-containing protein	N/A	0	21.3581	21.6861	21.6836	NaN	NaN	NaN	22.0652	21.7656	21.4397	0.357141	-0.180918									30.702	20	17.3	7.29132	6.57505	6.54042	6.34404	5.70791	5.89946	6.00505	6.41642	6.42815	6.40073	4	5	3	1	1	3	4	4	4	84.181
	TGVEG_244110;TGME49_244110;TGVEG_244105;TGGT1_244110	hypothetical protein;nucleosome assembly protein (nap) protein	N/A	0;1	21.1782	21.2742	21.3322	21.1847	NaN	21.3529	21.3375	21.0962	21.0882	0.396801	0.0875937									5.0798	16	6.7	7.27517	6.37834	6.43115	6.33359	6.35382	6.01418	6.4778	6.21566	6.22528	6.29677	2	2	2	2	1	2	2	2	2	48.586
	TGVEG_244200;TGME49_244200;TGGT1_244200	2-oxoglutarate dehydrogenase e1 component, mitochondrial precursor, putative;putative 2-oxoglutarate dehydrogenase e1 component, mitochondrial precursor	HMM: MRSLRSFSTSRWTRGASLSHPTARRSPSASLSLSSSLLSPVVVSAR, NN: MRSLRSFSTSRWTRGA	0	NaN	NaN	NaN	NaN	NaN	NaN	NaN	21.378	21.4103	0	NaN									4.8779	11	4.5	7.07631	6.18333	5.94533	5.85769	5.97454	5.9211	6.04368	6.13008	6.24677	6.44666	1	2	1	1	1	1	1	2	3	124.25
	TGVEG_244310;TGME49_244310;TGGT1_244310	GTP-binding protein	N/A	0	NaN	NaN	19.5407	NaN	NaN	NaN	NaN	NaN	NaN	0	NaN									1.5907	8	3.8	6.88588	5.93947	6.1653	5.80381	6.17857	5.9511	5.93945	5.63964	5.69767	5.71013	1	1	1	1	1	1	1	1	1	40.835
	TGVEG_244370;TGME49_244370;TGGT1_244370	putative TDC1;TDC1, putative	HMM: MRFPSLIPSLPGSCIPLLAWKHSAFWISGTPGFLFSVSECLLCAEAHSA, NN: MRFPSLIPSLPGSCIPLLAWKHSAFWISGTPGFLFSV	7	21.7436	21.4807	21.2711	21.2567	21.7879	22.032	21.2235	21.2223	21.7466	0.172425	0.101016									7.6272	15	8.7	7.39641	6.39756	6.41931	6.15963	6.47087	6.49028	6.72757	6.24652	6.32662	6.48691	2	2	2	3	3	3	3	3	3	64.317
	TGVEG_244440;TGME49_244440;TGGT1_244440	nucleoside transporter protein	N/A	10	22.5082	22.5197	21.9912	22.3	21.9245	22.517	22.1344	22.163	22.9098	0.071304	-0.0627015									7.0078	15	14.3	7.63838	6.89763	6.7644	6.5164	6.64025	6.67106	6.75303	6.40107	6.62555	6.70175	4	3	3	3	3	3	3	3	3	50.966
	TGVEG_244450B;TGME49_244450;TGGT1_244450;TGVEG_244450A	protein phosphatase 2C domain-containing protein	HMM: MPTFCSTFPARLAIPRLLAVLLLLGLWHGRAP, NN: MPTFCSTFPARLAIPRLLAVLLLLGLWHGRAPE;N/A	0	21.0087	20.7258	20.5648	NaN	NaN	NaN	NaN	NaN	NaN	0	NaN	+								3.9063	10	4.3	7.05911	6.31587	6.28961	6.10144	6.12159	6.14126	6.15131	5.65078	5.88422	5.92393	2	2	2	1	1	1	1	1	1	95.398
	TGVEG_244560;TGME49_244560;TGGT1_244560	heat shock protein 90, putative;putative heat shock protein 90	HMM: MSPAGRRTPKKLAFAALLLGVSVACTSSFFSASVAPSALWVAAT, NN: MSPAGRRTPKKLAFAALLLGVSVAC;HMM: MSPAGRRTPKKLAFAALLLGVSVACTSSFFSASVSPSALWVAAT, NN: MSPAGRRTPKKLAFAALLLGVSVAC	1	26.0245	26.0966	26.0289	26.3219	25.9993	25.7903	26.2749	26.3303	25.9962	0.641031	-0.150507									111.94	179	42.1	8.75874	7.81271	7.85421	7.76506	7.91495	7.72517	7.88639	7.64623	7.79352	7.78066	20	18	19	21	17	20	18	21	21	96.792
	TGVEG_244910;TGME49_244910;TGGT1_244910	MIZ/SP-RING zinc finger domain-containing protein	N/A	0	21.5353	21.7089	21.9542	21.3106	NaN	21.422	NaN	NaN	NaN	0	NaN	+								11.481	15	3.5	7.22386	6.56831	6.42615	6.5959	6.2236	6.06524	6.55578	NaN	NaN	NaN	3	3	3	3	1	3	0	0	0	145.17
	TGVEG_245450;TGME49_245450;TGGT1_245450	hypothetical protein	N/A	0	NaN	NaN	19.8744	NaN	NaN	NaN	NaN	NaN	NaN	0	NaN									3.9452	7	9	6.5242	NaN	6.0393	5.90426	NaN	NaN	NaN	5.88401	NaN	5.83317	1	1	1	1	0	0	1	1	1	15.379
	TGVEG_245460;TGME49_245460;TGGT1_245460	ribosomal protein RPS8	N/A	0	25.6515	25.4289	25.482	25.5073	25.4433	25.2125	25.6921	25.6159	25.1536	0.0646026	0.0336202	+								54.922	59	46.8	8.57363	7.85469	7.73621	7.62155	7.58722	7.48189	7.59829	7.45758	7.53764	7.54366	8	7	7	5	5	5	6	6	6	23.561
	TGVEG_245680;TGME49_245680;TGGT1_245680	ribosomal protein RPL21	N/A	0	23.1798	23.1455	23.269	23.207	22.9818	22.6837	23.1898	23.3288	22.6954	0.257726	0.126775									5.5659	29	27.4	7.85115	6.99388	7.04104	6.86379	7.00711	6.7616	6.83343	6.73984	6.95303	6.7483	4	4	2	4	3	3	3	4	3	17.894
	TGGT1_246130;TGVEG_246130;TGME49_246130	serpin (serine proteinase inhibitor) superfamily protein	N/A	0	22.1964	22.4087	22.2486	22.492	22.3812	21.9911	22.2367	22.2964	21.9856	0.414386	0.11169									13.542	36	22.5	7.60635	6.74998	6.87401	6.57455	6.76311	6.65202	6.35648	6.27612	6.67212	6.64279	6	6	5	6	6	3	4	6	5	47.399
	TGVEG_246220;TGGT1_246220;TGME49_246220	hypothetical protein;putative LITAF-like protein	N/A	2	22.6145	22.9682	23.0892	22.5078	22.8171	NaN	NaN	NaN	NaN	0	NaN									7.0054	16	7.4	7.66397	6.88687	6.88602	6.9222	6.65648	6.73959	6.42439	6.62416	6.46934	6.40382	4	4	3	2	2	2	1	1	1	85.38
	TGVEG_246450;TGME49_246450;TGGT1_246450	hypothetical protein;putative transmembrane protein	HMM: MCGPLSRFVGGKRSACKCMTLRTFTIFWLTIFTLVSLFELVAGS, NN: MCGPLSRFVGGKRSACKCMTLRTFTIFWLTIFTLVSLFELVAGS	4	NaN	20.9023	NaN	NaN	NaN	NaN	NaN	NaN	NaN	0	NaN									2.9535	5	13.9	7.14811	NaN	6.32364	NaN	5.84258	6.11896	NaN	6.46055	6.33157	6.69128	0	1	0	1	1	0	1	1	1	27.791
	TGVEG_246540;TGME49_246540;TGGT1_246540	cytochrome c1, heme protein	N/A	1	23.9266	24.0889	24.1341	24.0213	23.661	24.3195	24.0164	23.9646	24.3045	0.135652	-0.0452633	+								35.754	42	25.4	8.14214	7.16726	7.30516	7.19877	7.06911	6.86419	7.35031	7.19526	7.12772	7.24269	7	6	6	5	4	4	4	5	5	45.968
	TGVEG_246560;TGME49_246560;TGGT1_246560	putative vacuolar ATP synthase subunit g;vacuolar ATP synthase subunit g, putative	N/A	0	NaN	18.6064	NaN	NaN	NaN	NaN	NaN	NaN	NaN	0	NaN									2.175	1	16.8	6.04988	5.84053	5.63248	NaN	NaN	NaN	NaN	NaN	NaN	NaN	1	1	0	0	0	0	0	0	0	14.837
	TGVEG_246580;TGME49_246580;TGGT1_246580	hypothetical protein;putative transmembrane protein	HMM: MGECAILAICLVVFFAVLMSF, NN: MGECAILAICLVVFFAVLMSFDYRDGI	1	22.0914	21.9	21.4105	21.835	22.3555	22.4886	22.251	22.0359	22.5313	0.885836	-0.472089	+	+		+		+	+		9.5764	17	17.5	7.56538	6.78756	6.68772	6.56114	6.4774	6.13344	6.70946	6.60539	6.53043	6.71683	4	4	4	3	2	3	3	3	3	42.82
	TGVEG_246920;TGME49_246920;TGGT1_246920	glutathione reductase	HMM: MAAKMAAATRRHFDLFVIGGGSGGLACAR, NN: MAAKMAAATRRHFDLFVIGGGSGGL	0	NaN	NaN	NaN	19.7205	NaN	NaN	NaN	NaN	NaN	0	NaN									2.4496	1	3.1	5.9025	NaN	NaN	NaN	5.9025	NaN	NaN	NaN	NaN	NaN	0	0	0	1	0	0	0	0	0	52.594
	TGVEG_246940;TGME49_246940;TGGT1_246940	hypothetical protein	N/A	0	NaN	NaN	NaN	NaN	NaN	NaN	20.0956	20.5052	20.6107	0	NaN	+								8.8532	14	9.9	6.88852	5.97118	5.93565	5.47579	5.7733	5.8743	6.03459	5.86703	6.05503	6.12795	1	1	1	1	1	1	3	3	2	44.459
	TGVEG_246982;TGME49_246982;TGGT1_246982	hypothetical protein;putative glycosyltransferase	HMM: MMAALSFSQESPWRAACHIGLFLSLLRFVLALPCLALFSLGTFFLLLLWLRRLPPPANCV, NN: MMAALSFSQESPWRAACHIGLFLSLLRFVLALPCLALFSLGTFFLLLLWLRRLPPPANCV;HMM: MMAALSFSQESPWRVACHIGLFLSLLRFVLALPCLALFSLGTFFLLLLWLRRLPPPANCV, NN: MMAALSFSQESPWRVACHIGLFLSLLRFVLALPCLALFSLGTFFLLLLWLRRLPPPANCV	1;2	NaN	NaN	18.0586	NaN	NaN	NaN	NaN	NaN	NaN	0	NaN									2.2974	1	2.9	6.38767	5.3459	5.41285	5.35765	5.43838	5.38335	NaN	6.08533	NaN	NaN	1	1	1	1	1	0	1	0	0	113.51
	TGVEG_247220;TGME49_247220;TGGT1_247220	nudix -type motif 9 isoform a family protein	N/A	0	NaN	NaN	NaN	20.1453	20.0042	21.0333	NaN	NaN	NaN	0	NaN									6.5459	7	9.9	6.80284	5.54085	6.01728	5.82223	5.98056	5.91117	6.40273	NaN	NaN	NaN	2	2	2	2	2	2	0	0	0	60.639
	TGVEG_247350;TGME49_247350;TGGT1_247350	thioredoxin domain-containing protein	HMM: MPQAKTPTAVLSLANVFFSTFIAVSGD, NN: MPQAKTPTAVLSLANVFFSTFIAVSGD	4	27.1563	27.0217	27.11	27.0668	26.8315	27.3446	27.3987	27.3427	27.1739	1.25403	-0.209073									12.61	68	25.3	9.118	8.17132	8.21373	8.23631	8.25215	7.94927	8.23383	8.09103	8.12914	8.1173	5	5	5	5	3	4	5	5	5	33.676
	TGVEG_247410;TGME49_247410;TGGT1_247410	hypothetical protein;putative transmembrane protein	N/A	1	NaN	21.2943	21.6637	NaN	NaN	NaN	NaN	NaN	NaN	0	NaN									4.6976	10	34.1	7.10762	6.28328	6.38286	6.4835	6.06826	6.12769	5.83264	5.82036	5.86853	5.92483	1	2	2	1	3	1	1	1	1	13.855
	TGVEG_247420;TGME49_247420;TGGT1_247420	hypothetical protein;putative transmembrane protein	N/A	3	21.8676	21.8023	21.9325	NaN	NaN	NaN	NaN	NaN	NaN	0	NaN	+								8.7882	8	10.3	7.04532	6.60176	6.58124	6.51724	NaN	NaN	NaN	NaN	NaN	NaN	3	4	3	0	0	0	0	0	0	69.299
	TGVEG_247460;TGME49_247460;TGGT1_247460	proliferating cell nuclear antigen PCNA1	N/A	0	NaN	NaN	20.9257	20.8377	NaN	20.5423	NaN	NaN	NaN	0	NaN									3.6349	8	13.2	6.98332	5.84074	6.08357	6.2283	6.22329	NaN	6.24	5.65739	6.12287	5.92174	1	1	2	2	0	2	2	2	1	34.551
	TGVEG_247470;TGME49_247470;TGGT1_247470	nucleolar protein, putative;putative nucleolar protein	N/A	0	21.9597	21.9337	21.9621	22.0208	21.8785	21.6079	22.3332	22.3613	21.6079	0.237615	-0.148954									14.715	28	25.4	7.51597	6.69646	6.711	6.32801	6.57575	6.17371	6.6313	6.61636	6.5869	6.4822	4	4	3	4	3	5	6	6	4	59.939
	TGVEG_247510;TGME49_247510;TGGT1_247510	fructose-bisphospatase II	N/A	0	23.1562	23.3396	23.4673	23.4641	22.7129	22.8647	23.5355	23.3504	23.0609	0.0108172	0.00541306									30.441	41	27.8	7.90776	6.72929	7.10483	7.00009	7.10329	6.7098	6.99384	6.72454	7.06472	6.91328	4	6	5	7	5	6	4	7	6	42.397
	TGVEG_247550;TGME49_247550;TGGT1_247550	heat shock protein HSP60	N/A	0	25.2029	25.1714	24.9989	25.3819	25.1292	24.9834	25.3451	25.2808	25.089	0.498808	-0.113871									95.991	96	45	8.49547	7.65745	7.6814	7.54373	7.60154	7.61631	7.48924	7.32054	7.36767	7.44945	16	12	10	13	13	13	11	11	11	60.913
	TGVEG_247680;TGME49_247680;TGGT1_247680	hypothetical protein;putative transmembrane protein	HMM: MRLRFSLLFSVLLPFLLPVLLSRLSLFIWLTASVGLSLSE, NN: MRLRFSLLFSVLLPFLLPVLLSRLSLFIWLTASVGLSLSE	1	NaN	NaN	NaN	NaN	NaN	21.2502	NaN	NaN	NaN	0	NaN									2.0534	1	0.8	6.93186	NaN	NaN	NaN	6.42424	6.4927	6.44439	NaN	NaN	NaN	0	0	0	1	1	1	0	0	0	190.85
	TGME49_247760;TGGT1_247760;TGVEG_247760	AMP-binding enzyme domain-containing protein	N/A	0	23.2925	23.3801	23.5586	23.3153	23.8121	23.3592	23.9244	23.6234	23.7634	1.43133	-0.36005									21.882	52	20.4	7.98153	6.96037	7.0798	7.00996	6.931	7.01423	6.98043	7.0881	7.04642	7.10237	6	6	6	6	5	9	8	7	8	86.986
	TGVEG_247780;TGME49_247780;TGGT1_247780	hypothetical protein;putative transmembrane protein	N/A	4	NaN	21.7679	NaN	NaN	NaN	NaN	NaN	NaN	NaN	0	NaN									3.4626	9	11.6	7.11177	6.23014	6.5842	6.13062	NaN	6.34506	NaN	6.10473	6.03575	6.16873	2	2	1	0	1	1	2	2	1	28.986
	TGVEG_247930;TGME49_247930;TGGT1_247930	SNARE domain-containing protein	N/A	1	NaN	NaN	NaN	19.4221	NaN	NaN	NaN	NaN	NaN	0	NaN									1.9435	1	4.6	5.81269	NaN	NaN	NaN	5.81269	NaN	NaN	NaN	NaN	NaN	0	0	0	1	0	0	0	0	0	36.304
	TGVEG_248340;TGME49_248340;TGGT1_248340	GTP-binding nuclear protein ran/tc4	N/A	0	24.7891	24.9132	24.9743	24.981	24.902	24.7201	25.163	24.9868	24.455	0.0368955	0.0239143									16.129	39	38	8.38853	7.5094	7.48945	7.49982	7.53845	7.41644	7.41536	7.29931	7.41692	7.23439	6	5	6	6	5	5	4	5	4	25.997
	TGVEG_248390;TGME49_248390;TGGT1_248390	ribosomal protein RPL26	N/A	0	22.634	22.4711	22.4428	NaN	NaN	22.0097	22.3535	22.3965	22.5602	0.384649	0.0792351									11.302	12	25.5	7.62704	6.80129	6.86112	6.75062	6.40281	6.59325	6.66392	6.52878	6.68717	6.58438	3	2	2	1	1	1	2	3	2	16.309
	TGVEG_248420;TGME49_248420;TGGT1_248420	hypothetical protein;putative transporter	N/A	10	NaN	NaN	NaN	NaN	NaN	NaN	NaN	NaN	21.006	0	NaN									3.6577	9	6.2	6.84986	NaN	5.72842	NaN	5.70574	5.72207	5.78173	6.12988	6.23114	6.26734	0	1	1	1	1	1	2	2	2	79.034
	TGVEG_248460;TGME49_248460;TGGT1_248460	putative ubiquitin;ubiquitin, putative	N/A	0	24.2819	24.4449	24.4572	24.4704	24.1704	24.2483	24.8723	24.7078	24.4482	0.971067	-0.281429									15.654	51	49.1	8.2615	7.2989	7.45492	7.28185	7.33524	7.05281	7.27247	7.28441	7.33642	7.35122	7	8	7	7	7	6	7	7	7	24.405
	TGVEG_248480;TGME49_248480;TGGT1_248480	ribosomal protein RPS9	N/A	0	25.4904	25.445	25.5729	25.8598	25.3102	25.1651	25.7534	25.6374	25.1788	0.0386061	-0.0203959									8.7898	45	37.2	8.57339	7.6516	7.68765	7.50087	7.71198	7.53833	7.65583	7.59231	7.63426	7.55252	6	5	4	4	5	5	6	7	6	21.684
	TGVEG_248670;TGME49_248670;TGGT1_248670	V-type H(+)-translocating pyrophosphatase VP1	HMM: MGGRRRSFFLSTAGALAPAVAT, NN: MGGRRRSFFLSTAGALAPAVAT	17	NaN	NaN	NaN	NaN	NaN	NaN	21.8716	NaN	NaN	0	NaN	+								4.6072	6	3.8	6.89337	NaN	5.90726	NaN	6.01841	5.83156	NaN	6.37771	6.29761	5.96521	0	1	0	1	1	0	3	2	1	85.295
	TGVEG_248700;TGME49_248700;TGGT1_248700	alveolin domain containing intermediate filament IMC12	N/A	0	21.8927	21.4671	22.1726	21.9102	21.688	21.592	21.8313	21.5143	21.5127	0.414018	0.224716									7.5195	19	15.9	7.43992	6.52807	6.42724	6.52731	6.53921	6.34712	6.53964	6.46238	6.45367	6.50918	2	2	2	3	2	3	3	3	3	29.762
	TGGT1_248740;TGVEG_248740;TGME49_248740	hypothetical protein	N/A	0	24.4205	24.47	24.7438	24.3578	24.5318	24.3436	24.8955	24.6081	24.494	0.317719	-0.121133									97.886	94	17.8	8.28517	7.37803	7.39079	7.43359	7.22303	7.1651	7.40664	7.3001	7.33921	7.26909	10	11	12	7	7	9	8	10	8	140.08
	TGVEG_248810;TGME49_248810;TGGT1_248810	nuclear factor NF7	N/A	0	NaN	NaN	NaN	NaN	NaN	NaN	NaN	NaN	19.4026	0	NaN									4.2943	3	6.6	6.57089	5.38659	NaN	5.81035	5.90734	5.592	NaN	5.66787	5.74823	5.78466	1	0	1	1	1	0	1	1	1	54.305
	TGGT1_249030;TGVEG_249030;TGME49_249030	endonuclease/exonuclease/phosphatase family protein	N/A	0	24.4953	24.4658	24.8435	24.4217	24.3325	24.1745	24.8961	24.5873	24.4144	0.0577843	-0.0310593									43.387	78	29	8.28158	7.377	7.35633	7.47427	7.31547	7.03775	7.38072	7.26562	7.271	7.34618	8	8	8	7	6	8	8	9	9	60.256
	TGVEG_249180;TGME49_249180;TGGT1_249180	bifunctional dihydrofolate reductase-thymidylate synthase	N/A	0	22.9459	23.2623	23.1074	23.3427	23.0878	22.6202	22.8726	22.8523	22.582	1.20792	0.336256									41.149	40	20.7	7.82858	6.86488	7.14411	6.97616	7.0291	6.72195	6.83067	6.59634	6.69661	6.6992	7	8	7	5	4	4	5	5	5	68.751
	TGGT1_249200	Ctr copper transporter family protein	HMM: MTISASSTARGCAAPPLHAETVARSPPSVKPATWLPPSSLFQGRWTKFLLAASALFAVTTQ, NN: MTISASSTARGCAAPPLHAETVARSPPSVKPATWLPPSSLFQGRWTKFLLAASALFAVTTQ	4	NaN	19.7287	NaN	NaN	NaN	NaN	NaN	NaN	NaN	0	NaN									1.757	3	4.3	6.90922	6.4645	5.97034	NaN	6.0732	NaN	NaN	6.07631	5.89258	6.04493	1	1	0	1	0	0	1	1	1	25.614
	TGVEG_249250;TGME49_249250;TGGT1_249250	ribosomal protein RPL35A	N/A	0	NaN	NaN	NaN	NaN	NaN	22.6866	NaN	NaN	NaN	0	NaN									6.1521	9	23.2	7.72545	6.69319	6.82913	6.89113	7.06945	6.80179	6.87678	6.66489	6.5389	NaN	1	1	1	2	2	2	1	1	0	12.847
	TGVEG_249270;TGME49_249270;TGGT1_249270	protein disulfide isomerase-related protein (provisional), putative;putative protein disulfide isomerase-related protein (provisional)	HMM: MAFTGARMRRGAPLSSLLCLAPGCTYTG, NN: MAFTGARMRRGAPLSSLLCLAPGCTYTG	0	22.3683	22.5236	21.9512	22.3952	22.1176	22.344	22.3522	22.6481	22.0942	0.131574	-0.0837536									9.0131	15	11.3	7.5764	6.54311	6.62214	6.42459	6.49308	6.30149	6.52009	7.04759	6.73584	6.3687	3	3	3	3	3	3	4	3	2	59.94
	TGGT1_249380;TGVEG_249380;TGME49_249380	DHHC zinc finger domain-containing protein	N/A	4	NaN	NaN	NaN	NaN	NaN	NaN	NaN	NaN	22.7322	0	NaN									1.9911	1	7.5	6.93955	NaN	NaN	NaN	NaN	NaN	NaN	6.02666	6.18015	6.78698	0	0	0	0	0	0	1	1	1	49.906
	TGVEG_249390;TGME49_249390;TGGT1_249390	glutamate/leucine/phenylalanine/valine dehydrogenase family protein	HMM: MVHVSASLPFSFFPRFFLSQPRGTRSF, NN: MVHVSASLPFSFFPRFFLSQPRGTRSF;HMM: MVHVSASLPFSFFPRLFLSQPRGTRSI, NN: MVHVSASLPFSFFPRLFLSQPRGTRSI	0	25.3099	25.2709	25.1326	25.3111	25.2828	25.2512	25.4868	25.2996	25.3489	0.840146	-0.140606									47.166	127	25.5	8.52082	7.59844	7.67133	7.80404	7.53899	7.39742	7.61716	7.35654	7.41867	7.49912	20	21	16	19	17	19	18	18	18	135.7
	TGVEG_249480;TGME49_249480;TGGT1_249480	tetratricopeptide repeat-containing protein	N/A	0	NaN	NaN	NaN	NaN	NaN	NaN	NaN	NaN	18.535	0	NaN									3.0061	1	1.7	5.5235	NaN	NaN	NaN	NaN	NaN	NaN	NaN	NaN	5.5235	0	0	0	0	0	0	0	0	1	126.39
	TGVEG_249530;TGME49_249530;TGGT1_249530	exportin 1, putative;putative exportin 1	N/A	0	22.7561	22.7396	22.5053	23.0588	23.028	23.1667	22.8732	22.7655	23.1261	0.884672	-0.254603									30.834	68	18.6	7.78716	6.73225	6.9987	6.51985	6.71923	6.74265	6.93208	6.92197	6.81056	6.92625	8	9	8	7	9	9	12	9	11	129.09
	TGGT1_249570;TGVEG_249570;TGME49_249570	hypothetical protein;putative transmembrane protein	HMM: MTMARRTIWSLMPLFGLLGATGS, NN: MTMARRTIWSLMPLFGLLGATGS	1	NaN	NaN	21.2344	NaN	NaN	NaN	NaN	NaN	NaN	0	NaN									4.4092	6	5.3	7.05323	5.90156	NaN	6.31368	5.88374	6.00022	6.54408	6.21535	5.85191	5.9187	1	0	1	1	1	1	1	1	1	30.251
	TGVEG_249590;TGME49_249590;TGGT1_249590	proteasome subunit alpha type 5-2, putative;putative proteasome subunit alpha type 5-2	N/A	0	21.2645	21.4348	21.2946	NaN	NaN	NaN	NaN	NaN	NaN	0	NaN									5.5819	11	12.8	7.12222	6.39387	6.47542	6.34792	6.15966	6.00462	5.96289	5.80214	5.9197	5.85635	2	2	2	1	1	1	1	1	1	28.279
	TGGT1_249780;TGVEG_249780;TGME49_249780	hypothetical protein	N/A	0	21.9981	22.1701	22.1257	22.4215	NaN	21.9614	22.0446	21.7634	21.5391	0.952409	0.315552									29.088	19	16.5	7.49952	6.7453	6.7858	6.63918	6.63136	5.81042	6.57044	6.5021	6.2572	6.28578	3	3	3	2	3	2	4	3	2	35.517
	TGVEG_249850;TGME49_249850;TGGT1_249850	GAP40 protein	N/A	9	25.0119	25.1527	25.3971	24.9918	24.6809	25.1936	25.6953	25.4146	25.277	0.758431	-0.275078									21.588	32	15.6	8.49747	7.54825	7.58276	7.56301	7.52825	7.36931	7.6213	7.5296	7.53617	7.56876	3	3	3	3	3	4	3	3	3	43.081
	TGVEG_249900;TGME49_249900;TGGT1_249900	adenine nucleotide translocator, putative;putative adenine nucleotide translocator	N/A	4	26.5374	26.8187	26.632	26.6384	26.3689	26.5055	26.8147	26.7659	26.5706	0.186363	-0.0543321									111.37	126	58.5	8.93035	7.91882	8.0898	7.91437	8.01263	7.86738	8.00013	7.94991	7.98698	8.00419	14	15	15	14	13	14	14	15	17	35.255
	TGVEG_249990;TGME49_249990;TGGT1_249990	hypothetical protein;putative microtubule-binding protein	N/A	0	22.2592	22.1615	22.1278	22.4611	22.6936	21.7097	22.5082	22.3166	21.9014	0.117538	-0.0592187									9.7943	28	10.7	7.59006	6.70924	6.5388	6.70321	6.81384	6.85673	6.30914	6.45237	6.52643	6.52475	5	3	3	4	4	2	4	4	5	92.585
	TGVEG_250330;TGME49_250330;TGGT1_250330	DDRGK domain protein;hypothetical protein	HMM: MGPLSRSVDSSFRGRVFCLQPSCACSFALAT, NN: MGPLSRSVDSSFRGRVFCLQPSCACSFALATRMTIFAITAL;HMM: MGPLSRSVDSSFRGRVFCLQPSCACSFALAT, NN: MGPLSRSVDSSFRGRVFCLQPSCACSFALATRMTIFAITALDSFVSAD	0	NaN	NaN	NaN	NaN	NaN	NaN	NaN	NaN	17.2017	0	NaN	+								1.8526	1	3.9	5.29325	NaN	NaN	NaN	NaN	NaN	NaN	NaN	4.80602	5.12215	0	0	0	0	0	0	0	1	1	46.841
	TGVEG_250770;TGME49_250770;TGGT1_250770	eukaryotic initiation factor-4A, putative;putative eukaryotic initiation factor-4A	N/A	0	26.9858	27.0069	26.9893	27.1744	26.8428	26.9915	27.0424	27.1155	26.9111	0.184003	-0.0290273									120.61	181	58.3	9.04692	8.18444	8.25479	8.06978	8.13049	7.98805	8.11056	7.98363	8.06819	7.95112	17	19	16	14	14	18	15	14	16	46.673
	TGGT1_250820;TGVEG_250820;TGME49_250820	hypothetical protein	N/A	0	21.5522	21.985	22.1151	21.5687	NaN	NaN	22.5057	21.5213	21.7781	0.0514225	-0.0509141									6.2609	18	5.2	7.37814	6.43946	6.60064	6.5351	6.30784	5.84086	5.83058	6.73695	6.3076	6.45189	3	2	2	2	1	2	4	2	3	120.91
	TGVEG_250830;TGME49_250830;TGGT1_250830	SAC3/GANP family protein	N/A	0	NaN	22.3944	22.9849	NaN	NaN	NaN	NaN	NaN	NaN	0	NaN									42.516	17	19.7	7.3324	5.93711	6.76111	6.8482	6.47839	6.35793	5.45588	NaN	6.04739	6.05069	2	4	3	4	2	3	0	1	2	41.072
	TGGT1_250870;TGVEG_250870;TGME49_250870	DHHC zinc finger domain-containing protein	N/A	4	NaN	NaN	NaN	NaN	NaN	NaN	NaN	NaN	21.3459	0	NaN									4.801	12	11.4	7.26656	6.29378	6.4793	NaN	NaN	6.47327	6.52983	6.42085	6.33323	6.36966	1	1	1	1	2	1	1	1	3	39.814
	TGVEG_250880;TGME49_250880;TGGT1_250880	kinase, pfkB family protein	N/A	0	NaN	17.8309	NaN	NaN	NaN	NaN	NaN	NaN	NaN	0	NaN									1.9522	2	7.5	6.62422	5.34592	5.39903	NaN	6.10188	6.08767	6.09653	NaN	NaN	NaN	1	1	0	1	1	1	0	0	0	49.957
	TGVEG_251500;TGME49_251500;TGGT1_251500	eukaryotic initiation factor-3, subunit 3, putative;putative eukaryotic initiation factor-3, subunit 3	HMM: MVESDEETRGAPKCFSSVLAHIGLLSLSRLAVFSLLVLAASRLLLLALSR, NN: MVESDEETRGAPKCFSSVLAHIGLLSLSRLAVFSLLVLAA	0	20.7991	21.168	20.8178	21.3924	21.0177	20.8961	NaN	20.5874	21.2961	0.0142401	-0.013442									7.1864	13	10	7.21717	6.57203	6.57181	6.36464	6.21521	6.03064	6.34276	5.33397	5.71092	6.02641	3	2	2	2	2	3	1	2	2	65.713
	TGVEG_251620;TGME49_251620;TGGT1_251620	flap structure-specific endonuclease 1, putative;putative flap structure-specific endonuclease 1	N/A	0	NaN	NaN	19.4165	NaN	NaN	NaN	NaN	NaN	NaN	0	NaN	+								1.452	2	3.8	6.2821	5.82252	5.82355	5.76643	NaN	NaN	NaN	NaN	NaN	NaN	1	1	1	0	0	0	0	0	0	60.295
	TGVEG_251680;TGME49_251680;TGGT1_251680	histamine-releasing factor, putative;putative histamine-releasing factor	N/A	0	NaN	NaN	NaN	23.3316	22.9375	23.0345	23.6304	23.6264	23.2634	0	NaN									2.3699	12	10.5	7.83715	6.71326	6.77005	6.7229	6.98354	6.7999	7.00091	6.90356	6.98579	6.94185	1	1	1	2	2	2	2	2	2	19.172
	TGVEG_251690;TGME49_251690;TGGT1_251690	putative seryl-tRNA synthetase, cytoplasmic;seryl-tRNA synthetase, cytoplasmic, putative	N/A	0	23.4203	23.9457	23.6751	23.4886	23.0756	23.2676	23.9644	23.5574	23.4277	0.0472204	0.0305754									32.756	41	22.4	7.99633	7.13862	7.29183	7.00805	6.95355	6.85448	7.07719	6.98434	6.97423	6.92828	5	6	4	4	4	5	4	5	5	54.116
	TGVEG_251760;TGME49_251760;TGGT1_251760	putative subunit of proteaseome activator complex;subunit of proteaseome activator complex, putative	N/A	0	NaN	NaN	NaN	20.9296	NaN	NaN	NaN	NaN	NaN	0	NaN									3.8817	9	12.6	6.95553	6.0267	6.09587	5.94372	6.26649	5.76218	5.90218	5.96334	5.94464	5.91101	1	1	1	2	2	1	1	1	1	30.711
	TGGT1_251770;TGVEG_251770;TGME49_251770	hypothetical protein;putative transmembrane protein	HMM: MEATQGCGVVAQAATPRRHQKSFPLRCLVLALTLFPILAPLICSE, NN: MEATQGCGVVAQAATPRRHQKSFPLRCLVLALTLFPILAP	1	NaN	NaN	NaN	NaN	NaN	NaN	20.3757	20.2333	19.92	0	NaN									7.0846	9	8.2	7.6507	7.40376	NaN	7.21415	5.24343	5.19193	5.41853	6.19346	5.64284	5.63819	1	0	1	1	1	2	4	2	3	138.29
	TGVEG_251780;TGME49_251780;TGGT1_251780	heat shock protein	HMM: MASMAAGASLAYRASYCSGA, NN: MASMAAGASLAYRASYCSGA	0	23.6313	23.5346	23.4847	23.7494	23.5042	23.1717	23.9462	23.848	23.341	0.348299	-0.161533									24.048	57	20.5	8.00441	7.06021	7.08293	6.94959	7.1837	6.96987	7.05419	6.99432	7.16516	6.90873	6	8	6	8	7	7	7	8	7	78.25
	TGVEG_251810;TGME49_251810;TGGT1_251810	putative translation initiation factor eIF-5A;translation initiation factor eIF-5A, putative	N/A	0	24.4087	24.3368	23.8854	24.3756	24.5372	24.5262	24.7565	24.6144	24.3911	0.900795	-0.377075									11.756	20	55.9	8.25508	7.18848	7.25113	7.10534	7.26717	7.44891	7.39394	7.32436	7.33616	7.29541	2	2	2	3	4	3	3	3	3	17.468
	TGVEG_251870;TGME49_251870;TGGT1_251870;TGVEG_305160;TGME49_305160;TGGT1_305160	histone H2Ba;histone H2Bb	N/A	0	25.2411	25.5411	25.6822	25.3245	24.7055	24.9898	25.1626	25.2167	24.8719	1.12888	0.404376									7.6156	33	30.4	8.48934	7.63087	7.44495	7.6382	7.6375	7.41052	7.566	7.44251	7.52484	7.43699	4	3	3	4	4	4	4	4	4	12.575
	TGVEG_251880;TGME49_251880;TGGT1_251880	tRNA synthetases class I family protein	HMM: MRLRTPSFLLSDLSSLLPLPFRTASTVASS, NN: MRLRTPSFLLSDLSSLLPLPFRTAS;HMM: MRLRTPSSLLSDLSSLLPLPFRTASTVASS, NN: MRLRTPSSLLSDLSSLLPLPFRTAS	0	NaN	NaN	NaN	21.0722	NaN	20.8867	NaN	NaN	NaN	0	NaN									2.2107	4	3.3	6.7329	NaN	NaN	NaN	6.32067	NaN	6.32183	5.5348	NaN	5.94103	0	0	0	2	0	2	1	1	1	60.169
	TGVEG_252290;TGME49_252290;TGGT1_252290	importin alpha, putative;putative importin alpha	N/A	0	23.3752	23.52	22.8937	23.2519	23.5066	23.3661	22.8985	22.9844	23.2077	0.480223	0.232755									19.394	39	19.6	7.90176	6.9407	7.11344	6.82151	6.96956	6.92662	7.09916	6.79104	6.92066	6.81776	5	5	5	6	6	6	6	6	5	59.36
	TGVEG_252360;TGGT1_252360;TGME49_252360	rhoptry kinase family protein ROP24 (incomplete catalytic triad)	HMM: MATRSFLFVFLALSSLGGLCSE, NN: MATRSFLFVFLALSSLGGLCSE	0	NaN	NaN	NaN	NaN	NaN	NaN	20.3876	21.0197	NaN	0	NaN									3.3769	8	4.5	7.03133	6.03635	6.37356	6.10425	6.14048	5.96989	NaN	5.93068	6.20723	6.09576	1	1	1	1	1	0	2	2	1	60.887
	TGVEG_252430;TGME49_252430;TGGT1_252430	hypothetical protein;putative START-2 domain protein	N/A	0	19.8036	19.4605	NaN	19.299	19.5984	19.6517	NaN	NaN	NaN	0	NaN									8.1401	8	5.2	6.75364	5.97253	5.88696	5.72636	5.77441	5.80786	5.93189	5.68571	5.56681	5.68362	2	2	1	2	2	2	1	1	1	83.767
	TGVEG_252630;TGME49_252630;TGGT1_252630	hypothetical protein	N/A	0	NaN	NaN	NaN	NaN	NaN	NaN	22.4082	22.062	21.891	0	NaN									2.7006	12	15.4	7.39658	6.31133	6.44129	6.42226	6.43976	6.33021	6.37149	6.51713	6.55536	6.52397	1	1	1	1	1	1	2	2	2	15.051
	TGVEG_253000;TGGT1_253000;TGME49_253000	ELMO/CED-12 family protein	HMM: MLFFSIHPALLLHCCGSIFAW, NN: MLFFSIHPALLLHCCGSIFAW	0	22.0876	21.8265	22.282	22.5124	22.4287	21.8357	22.7455	22.4799	22.347	1.22131	-0.458735									14.794	23	22.4	7.61631	6.77101	6.72829	6.58891	6.69838	6.67015	6.66317	6.56699	6.64983	6.57639	5	5	3	3	4	4	2	3	2	57.01
	TGVEG_253290;TGME49_253290;TGGT1_253290	valyl-tRNA synthetase	N/A	0	NaN	NaN	NaN	NaN	NaN	NaN	21.8963	22.2738	22.5002	0	NaN									11.623	14	6.1	7.2566	6.26522	6.04092	5.99049	5.98279	5.93769	6.16673	6.54744	6.70002	6.36199	2	1	2	2	1	2	4	4	3	124.91
	TGVEG_253430;TGME49_253430;TGGT1_253430	asparagine synthetase, putative;putative asparagine synthetase	N/A	0	25.6176	25.7143	25.5126	25.5264	25.3454	25.3884	25.951	25.6973	25.5323	0.343705	-0.112029									15.92	60	23.5	8.62092	7.6675	7.68919	7.29473	7.74764	7.65123	7.71096	7.70279	7.66342	7.73243	8	8	5	10	9	9	8	9	8	65.868
	TGVEG_253730;TGME49_253730;TGGT1_253730	importin-beta N-terminal domain-containing protein	HMM: MSAAPAAGGAPGDLQALAAQLPLASLLEETLAA, NN: MSAAPAAGGAPGDLQALAAQLPLASLLEETLAA	0	20.5672	20.4638	NaN	20.2924	20.4269	20.4228	NaN	NaN	NaN	0	NaN									19.683	12	8.5	6.87992	6.03767	6.04317	5.00856	6.39583	5.90345	6.14507	5.11153	5.22771	5.48273	2	2	1	3	4	3	1	1	1	115.14
	TGVEG_253820;TGME49_253820;TGGT1_253820	hypothetical protein	N/A	0	NaN	20.3505	20.6115	NaN	NaN	NaN	NaN	NaN	NaN	0	NaN									4.6316	3	19	6.7495	6.03794	6.15833	6.12548	NaN	NaN	NaN	5.74315	5.76719	5.78699	1	2	2	0	0	0	1	1	1	25.221
	TGGT1_253880;TGVEG_253880;TGME49_253880	GNS1/SUR4 family protein	HMM: MWSLWQLFHFYCLRPTGGADLARVLQVPIFVACALYVPVVYGL, NN: MWSLWQLFHFYCLRPTGGADLARVLQVPIFVACALYVPVVYGL	9	24.4926	24.9634	25.1913	24.3006	25.4677	25.0935	25.1924	25.1439	25.3409	0.734953	-0.343256									61.374	85	23	8.45614	7.42339	7.67531	7.58696	7.19692	7.41825	7.66241	7.4078	7.42996	7.51824	10	11	9	9	8	11	8	11	10	78.157
	TGME49_253900;TGGT1_253900;TGVEG_253900	parasite porphobilinogen synthase PBGS	HMM: MRPLSLFFRLSFLLFVLLFPSPSVDAL, NN: MRPLSLFFRLSFLLFVLLFPSPSVDAL	0	22.8646	22.8986	22.7886	22.5084	22.6616	23.0714	23.5987	22.8313	22.757	0.320317	-0.211727									17.049	39	20.4	7.80459	6.87619	6.98148	6.70631	6.65598	6.86281	7.17624	6.85452	6.68616	6.43861	6	6	4	4	7	8	5	4	4	71.373
	TGVEG_253940;TGME49_253940;TGGT1_253940	CAM Kinase family, incomplete catalytic triad	N/A	0	22.7858	NaN	NaN	NaN	NaN	NaN	NaN	NaN	NaN	0	NaN	+								3.2767	9	6.7	7.3832	6.85922	6.35091	6.4705	6.76983	6.63321	NaN	5.92253	NaN	5.85503	2	2	2	2	1	1	1	0	1	64.485
	TGVEG_254120;TGME49_254120;TGGT1_254120	autophagy-related protein 8 atg8, putative;putative autophagy-related protein 8 atg8	N/A	0	NaN	NaN	NaN	20.4665	20.2665	20.4429	NaN	NaN	NaN	0	NaN									6.2577	11	33.9	6.97592	5.69513	5.57441	5.48982	6.11254	6.04352	6.16143	5.3724	5.35301	6.59859	1	1	1	2	2	2	1	1	2	14.236
	TGVEG_254365;TGME49_254365;TGGT1_254365	phosphatidate cytidylyltransferase	N/A	4	NaN	21.7673	NaN	NaN	NaN	NaN	NaN	NaN	NaN	0	NaN									10.099	9	9.4	7.03056	NaN	6.58403	5.77014	6.50267	NaN	5.90922	6.36344	NaN	NaN	1	2	1	1	1	2	1	1	0	27.5
	TGGT1_254390;TGME49_254390;TGVEG_254390	CRAL/TRIO domain-containing protein	N/A	0	NaN	NaN	NaN	NaN	NaN	22.123	21.335	21.4706	22.1317	0	NaN									55.264	18	16.4	7.26578	6.0585	6.09307	5.99476	6.05346	6.26328	6.49646	6.3965	6.45992	6.55555	2	1	1	2	3	3	4	3	2	76.035
	TGVEG_254440;TGME49_254440;TGGT1_254440	ribosomal protein RPL12	N/A	0	22.7361	23.1302	22.9719	22.7611	22.4187	22.5082	22.8993	22.7978	22.3184	0.574145	0.274228									11.732	19	25.5	7.75992	6.91112	7.04324	6.91597	6.88186	6.48595	6.87679	6.58915	6.64757	6.55162	3	3	3	3	2	3	2	2	2	17.821
	TGME49_254570;TGGT1_254570;TGVEG_254570	hypothetical protein	N/A	0	NaN	NaN	20.5306	NaN	NaN	NaN	NaN	NaN	NaN	0	NaN									3.0466	2	2.7	6.45356	NaN	6.19794	6.10182	NaN	NaN	NaN	NaN	NaN	NaN	0	1	2	0	0	0	1	0	0	221.18
	TGVEG_254580;TGME49_254580;TGGT1_254580	UDP-galactose transporter family protein	N/A	8	NaN	NaN	19.8057	NaN	NaN	NaN	NaN	NaN	NaN	0	NaN									5.5937	13	6.3	7.00988	6.11982	6.18667	5.8836	6.14226	6.12307	6.1442	5.7879	6.00535	5.94223	1	1	1	1	1	1	1	1	1	45.48
	TGVEG_254690;TGGT1_254690;TGME49_254690	phospholipase/carboxylesterase	N/A	1	23.1474	20.8324	21.823	21.9405	NaN	21.2637	21.8228	20.8516	21.3851	0.328926	0.581101									7.3251	23	11.1	7.44525	7.0202	6.41517	6.63808	6.31444	5.92548	6.11173	6.3377	6.24388	6.36668	2	4	4	3	1	2	3	4	3	54.217
	TGVEG_254720;TGGT1_254720;TGME49_254720	dense granule protein GRA8	HMM: MALPLRVSATVFVVFAVFGVARAM, NN: MALPLRVSATVFVVFAVFGVARAM;N/A	0	19.6237	20.3009	NaN	NaN	NaN	NaN	NaN	NaN	NaN	0	NaN									4.5498	6	11.1	6.64508	5.90922	6.14139	5.74809	NaN	5.36631	6.00355	NaN	NaN	5.62297	2	2	1	0	1	1	0	0	1	26.123
	TGGT1_255195;TGVEG_255195;TGME49_255195	hypothetical protein	N/A	0	23.2446	22.5638	22.7244	21.8465	22.3844	22.425	NaN	NaN	NaN	0	NaN	+								25.251	24	19.1	7.5624	6.8629	6.8254	6.80002	6.47724	6.64658	6.94367	NaN	NaN	NaN	4	5	5	4	4	5	0	0	0	55.391
	TGVEG_255260;TGME49_255260;TGGT1_255260	apical membrane antigen AMA1	N/A	1	25.2684	25.2037	25.3596	25.3178	25.3951	25.1409	25.9375	25.6126	25.4874	1.32918	-0.401951									64.296	67	21.6	8.54757	7.59347	7.63713	7.49466	7.55592	7.47416	7.60904	7.65746	7.62317	7.65482	6	8	7	6	7	7	9	7	8	63.02
	TGGT1_255340	tetratricopeptide repeat-containing protein	N/A	0	18.7696	NaN	NaN	NaN	NaN	NaN	NaN	NaN	NaN	0	NaN									1.432	1	1.9	5.6502	5.6502	NaN	NaN	NaN	NaN	NaN	NaN	NaN	NaN	1	0	0	0	0	0	0	0	0	185.37
	TGVEG_255410;TGME49_255410;TGGT1_255410	hypothetical protein;putative transmembrane protein	HMM: MSTLTANGAGAACATPVESA, NN: MSTLTANGAGAACATPVESA	2	23.7432	23.2404	23.7582	24.0731	23.944	23.4025	24.5487	23.8262	24.128	1.02101	-0.587032									6.5504	21	10.3	8.08296	7.13424	7.03121	7.05641	7.23152	7.09611	7.1293	7.14585	7.06006	7.22629	1	1	1	1	1	1	1	1	1	17.53
	TGGT1_255420;TGVEG_255420;TGME49_255420	hypothetical protein	N/A	0	25.122	25.1581	25.1427	25.085	25.3634	25.1936	25.4527	25.2528	25.2001	0.971564	-0.16095									60.661	90	73.7	8.49181	7.51542	7.46091	7.43291	7.52118	7.48203	7.66426	7.46866	7.53159	7.68506	9	8	9	9	9	10	8	9	12	30.185
	TGVEG_255650;TGME49_255650;TGGT1_255650	DHHC zinc finger domain-containing protein	HMM: MFLLGACVFLLLLVCLALLWFFSTPDGSSPF, NN: MFLLGACVFLLLLVCLALLWFFSTPDGS	6	NaN	NaN	NaN	NaN	NaN	NaN	21.0854	20.5813	NaN	0	NaN									2.6909	8	6.2	6.81373	NaN	5.70679	NaN	5.95679	5.62969	6.05679	6.13748	6.08009	5.98098	0	1	0	1	2	1	2	2	1	53.072
	TGVEG_256000;TGME49_256000;TGGT1_256000	endoplasmic reticulum retention receptor	HMM: MAMNAFRFAGDMLHLLSIVLLLLKLRRSK, NN: MAMNAFRFAGDMLHLLSIVLLLLKLRRSKNCV	4	NaN	NaN	20.8377	NaN	NaN	NaN	NaN	NaN	NaN	0	NaN									3.7398	6	7.6	6.92726	NaN	6.08214	6.19424	NaN	NaN	NaN	6.28162	6.23817	6.31014	0	1	1	0	0	0	1	1	1	26.148
	TGVEG_256760;TGME49_256760;TGGT1_256760	pyruvate kinase PyK1	N/A	0	24.9613	24.9987	24.9376	25.1288	25.1039	24.6995	25.2667	25.3773	24.9164	0.721716	-0.220947									46.064	87	41.4	8.44344	7.56638	7.56747	7.47235	7.52943	7.32327	7.51042	7.29826	7.54649	7.5025	11	13	12	11	11	10	10	11	12	57.529
	TGVEG_256770;TGME49_256770;TGGT1_256770	eukaryotic translation initiation factor 4A, isoform 3, putative;putative eukaryotic translation initiation factor 4A, isoform 3	N/A	0	NaN	NaN	20.1021	NaN	NaN	NaN	NaN	NaN	NaN	0	NaN									2.247	6	10.1	6.80192	5.92218	5.97419	5.97284	5.895	5.58994	5.92934	5.75226	5.6196	5.78818	1	1	1	1	1	1	1	1	1	45.126
	TGVEG_256840;TGME49_256840;TGGT1_256840;TGME49_327500	hypothetical protein	N/A	0	NaN	NaN	NaN	NaN	NaN	17.2662	NaN	NaN	NaN	0	NaN									3.511	5	9.3	5.83121	5.5671	NaN	NaN	5.12411	NaN	5.24509	NaN	NaN	NaN	1	0	0	1	0	1	0	0	2	82.787
	TGGT1_256970;TGVEG_256970;TGME49_256970	putative vacuolar ATP synthase subunit A;vacuolar ATP synthase subunit A, putative	N/A	0	23.0278	22.9479	22.9547	23.0593	23.0581	22.8665	22.8988	23.0661	22.8331	0.234697	0.0441475									22.583	50	27.3	7.81831	6.91427	6.92532	6.82408	6.93157	6.8486	6.98907	6.66556	6.7785	6.81485	6	6	7	7	7	7	7	6	6	68.147
	TGVEG_256990;TGGT1_256990;TGME49_256990	glycyl-tRNA synthetase	N/A	0	22.2097	22.2495	22.0928	22.5353	22.6994	22.629	22.3516	22.2564	22.2795	0.950226	-0.111803									22.287	32	16.1	7.6398	6.80632	6.86049	6.69137	6.93158	6.61718	6.51206	6.50732	6.57203	6.33818	5	5	6	7	5	4	3	4	3	86.339
	TGVEG_257040;TGME49_257040;TGGT1_257040	TB2/DP1, HVA22 family protein	N/A	2	NaN	NaN	NaN	NaN	NaN	NaN	NaN	NaN	21.9209	0	NaN									5.8358	10	35	7.5063	6.59173	6.5987	6.43607	6.60841	6.60612	6.45093	6.55553	6.54109	6.54275	1	1	1	1	1	1	2	1	3	24.051
	TGVEG_257150;TGME49_257150;TGGT1_257150	NOT2 / NOT3 / NOT5 family protein	N/A	0	NaN	NaN	NaN	19.0919	NaN	18.3406	NaN	NaN	NaN	0	NaN									2.9622	6	3.4	6.36414	5.05142	5.11588	5.22683	5.70914	5.31894	5.5754	5.5485	5.48362	5.16572	1	1	1	1	1	1	1	1	1	53.15
	TGVEG_257350;TGME49_257350;TGGT1_257350	eukaryotic translation initiation factor, putative;putative eukaryotic translation initiation factor	N/A	0	NaN	19.7797	NaN	NaN	NaN	NaN	NaN	NaN	NaN	0	NaN									3.387	4	3.9	6.35778	5.88215	5.98569	NaN	NaN	NaN	NaN	NaN	5.73983	NaN	1	1	1	0	0	1	0	1	0	89.775
	TGVEG_257530;TGME49_257530;TGGT1_257530	transporter, major facilitator family protein	N/A	12	23.4962	24.7267	NaN	NaN	NaN	23.743	24.2268	24.855	23.9996	0.161631	-0.249063									5.1133	18	6.5	8.09681	7.04995	7.44007	6.62579	6.65537	6.99758	7.16649	7.05331	7.43388	7.15779	2	2	1	1	1	2	2	2	2	54.6
	TGVEG_257680;TGME49_257680;TGGT1_257680	myosin light chain MLC1	N/A	0	26.706	26.8041	27.0739	26.6165	26.8947	26.598	26.9533	26.8641	26.5369	0.172922	0.0765959									34.783	81	60.1	8.98512	8.03675	8.11511	8.0816	7.98557	8.0271	8.12421	7.90579	8.00402	7.94819	8	8	6	8	7	8	5	6	7	24.124
	TGVEG_257990;TGME49_257990;TGGT1_257990	heat shock protein 101, putative;putative heat shock protein 101	N/A	0	21.2042	20.9573	21.6298	21.4904	21.7246	21.2147	21.7969	21.7967	21.4786	0.89169	-0.426987									10.562	15	7	7.39058	6.45826	6.47235	6.5216	6.57076	6.2872	6.56765	6.29361	6.19934	6.40037	3	5	3	4	2	3	2	2	2	104.3
	TGVEG_258070;TGME49_258070;TGGT1_258070	hypothetical protein;signal recognition particle 68 kDa protein	N/A	0	NaN	NaN	NaN	NaN	NaN	18.9367	NaN	NaN	NaN	0	NaN									4.1732	7	7.7	6.66414	5.79825	5.88857	5.66166	NaN	5.62457	5.9645	5.73259	5.71421	5.54754	1	2	2	0	1	1	1	1	1	75.741
	TGVEG_258130;TGME49_258130;TGGT1_258130	Rab1 protein	N/A	0	NaN	NaN	24.841	NaN	NaN	NaN	NaN	NaN	NaN	0	NaN									2.1794	9	5.1	8.15152	NaN	7.44234	7.39938	7.36233	7.23525	7.39686	6.9047	6.81279	6.96816	0	1	1	1	1	1	1	1	1	23.872
	TGVEG_258150;TGME49_258150;TGGT1_258150;TGME49_325300	proteasome subunit alpha type 7, putative;proteasome subunit alpha type, putative;putative proteasome subunit alpha type 7	N/A	0	NaN	NaN	21.071	NaN	NaN	NaN	NaN	NaN	NaN	0	NaN									4.4061	8	14.7	7.15679	6.30531	6.37876	6.26449	6.27077	6.04933	5.9689	6.14987	6.14258	6.14004	1	1	1	1	1	1	1	1	1	27.081
	TGVEG_258410;TGME49_258410;TGGT1_258410	photosensitized INA-labeled protein PHIL1	N/A	0	22.6641	22.2999	22.9816	NaN	22.0334	22.1981	22.7725	22.3635	22.3115	0.271573	0.166068									28.519	23	26.1	7.64132	6.7921	6.80799	6.89579	6.44815	6.50099	6.69975	6.64131	6.58124	6.61479	3	3	3	1	2	2	2	2	2	18.844
	TGVEG_258470;TGME49_258470;TGGT1_258470	hypothetical protein	N/A	0	24.2067	23.9177	23.9623	24.238	23.0723	24.6518	24.6734	24.6402	24.4382	2.05719	-0.555028									14.926	43	40.5	8.21722	7.18373	7.25392	7.42275	6.99345	7.01423	7.4868	7.27503	7.28854	7.20664	3	4	5	4	3	5	5	6	6	31.707
	TGGT1_258580;TGVEG_258580;TGME49_258580	rhoptry protein ROP17	HMM: MELVLCFVIITISGVIRESSAL, NN: MELVLCFVIITISGVIRESSAL	0	23.4801	23.4923	23.22	23.6869	23.5735	23.3965	23.9178	23.6381	23.4721	0.819075	-0.27852									54.814	65	24	7.98919	7.11103	7.11598	6.81989	7.11401	6.94907	7.1371	7.04743	6.86199	7.03838	10	9	7	9	7	7	7	7	7	69.053
	TGVEG_258660;TGME49_258660;TGGT1_258660	rhoptry protein ROP6	HMM: MRSSVGQSRLPLKFFLAPFSVKNSVFALFFVFALVCVSGL, NN: MRSSVGQSRLPLKFFLAPFSVKNSVFALFFVFALVCVSGL;HMM: MRSSVGQSRLPLKFFLAPFSVQNSVFALFFVFALVCVSGL, NN: MRSSVGQSRLPLKFFLAPFSVQNSVFALFFVFALVCVSGLSW	1;2	NaN	22.1203	22.9028	22.6127	22.4881	22.5015	22.9132	23.3298	22.3659	0.304381	-0.358033									5.9009	10	11.9	7.69077	6.23714	6.34941	6.43797	6.76751	6.63203	7.13928	6.6941	6.93455	6.68969	1	2	2	2	2	3	2	2	1	51.403
	TGVEG_258826;TGME49_258826;TGGT1_258826	hypothetical protein;thioredoxin domain protein	HMM: MWRSSPLPRSFPRLLLALASLCCLYLP, NN: MWRSSPLPRSFPRLLLALASLCCLYLP;HMM: MWRSSPLPRSFPRLLLALASLCCLYLPPPPVYVHPC, NN: MWRSSPLPRSFPRLLLALASLCCLYLP	1	21.764	21.8988	22.2759	21.8493	22.4772	21.644	22.5595	22.3943	22.3161	1.23197	-0.443696									21.833	27	16.2	7.56326	6.40831	6.40049	6.35624	6.56182	6.80532	6.89376	6.61529	6.52651	6.58951	3	3	3	5	6	8	5	3	4	111.84
	TGVEG_258950;TGME49_258950;TGGT1_258950	lectin family protein	HMM: MAQGTVSLPRSGISAVSAFTLASCLLLSPLALFFLSVTASQ, NN: MAQGTVSLPRSGISAVSAFTLASCLLLSPLALFFLSVTAS	2	NaN	NaN	19.6325	NaN	NaN	NaN	NaN	NaN	NaN	0	NaN									1.9196	4	3.7	6.56425	5.59681	6.22235	5.83146	NaN	NaN	NaN	5.48163	5.53378	5.44626	1	2	2	1	0	0	2	1	1	70.29
	TGVEG_259010;TGME49_259010;TGGT1_259010	putative vacuolar ATP synthase subunit d;vacuolar ATP synthase subunit d, putative	N/A	0	NaN	NaN	NaN	NaN	NaN	NaN	19.444	20.3105	20.5516	0	NaN									4.8674	8	14.9	6.47328	5.08041	5.21378	NaN	NaN	NaN	NaN	5.84691	5.94283	6.04532	1	1	0	0	1	0	4	2	3	44.951
	TGVEG_259090;TGME49_259090;TGGT1_259090	ubiquitin-conjugating enzyme subfamily protein	N/A	0	22.94	22.8585	21.9933	21.9688	NaN	22.5018	NaN	NaN	NaN	0	NaN									6.0664	12	6.5	7.51178	6.87681	6.9066	6.63537	6.56892	6.13341	6.79988	5.3726	5.62806	5.73529	2	2	2	2	1	2	1	1	1	50.845
	TGVEG_259200B;TGGT1_259200B;TGME49_259200	Na+/H+ exchanger NHE1	N/A	0;12	NaN	NaN	NaN	NaN	NaN	17.7984	NaN	NaN	NaN	0	NaN	+								3.307	5	2	6.20825	5.50638	5.50063	5.55535	NaN	5.56139	5.4053	NaN	NaN	NaN	1	2	1	1	1	1	0	0	0	155.85
	TGVEG_259260;TGME49_259260;TGGT1_259260	membrane protein FtsH1	N/A	1	NaN	20.3264	NaN	NaN	NaN	NaN	NaN	NaN	NaN	0	NaN									1.5657	3	2.6	6.4435	5.67922	6.15023	5.80149	NaN	NaN	NaN	5.4018	NaN	NaN	1	2	1	0	0	0	1	0	0	136.92
	TGVEG_259550;TGME49_259550;TGGT1_259550	dihydropteroate synthase	HMM: MGCWPPSFACLRLSWWNLPLFHKRSAFFFWPPPGLRLRPLPGGAIAHCASSR, NN: MGCWPPSFACLRLSWWNLPLFHKRSAFFFWPPPGLRLR;HMM: MGCWPPSFACLRLSWWNLPLFHKRSAFFFWPPPGLRLRSLPGGAIAHCASSR, NN: MGCWPPSFACLRLSWWNLPLFHKRSAFFFWPPPGLRLR	0	21.8085	21.8409	21.4723	21.3959	21.7032	21.7912	21.949	21.7567	21.651	0.206633	-0.0783488	+								20.965	35	10.3	7.43377	6.59598	6.61875	6.17336	6.47265	6.5561	6.58813	6.47226	6.50659	5.97294	4	5	3	5	6	6	3	3	3	82.684
	TGVEG_259630;TGME49_259630;TGGT1_259630	hypothetical protein	N/A	0	20.9608	21.1362	21.9757	20.9554	20.7296	21.1869	20.9425	NaN	NaN	0	0.415066									26.082	17	23.1	7.23178	6.3079	6.39347	6.53179	6.27499	6.12879	6.51096	6.1118	5.8607	5.81454	2	2	2	2	2	2	2	1	1	18.313
	TGGT1_259650	hypothetical protein	N/A	0	NaN	NaN	NaN	NaN	NaN	NaN	NaN	19.0495	NaN	0	NaN									2.3513	3	4.5	5.85748	NaN	NaN	NaN	NaN	NaN	NaN	5.4902	5.61392	NaN	1	0	0	0	0	0	1	1	1	45.142
	TGVEG_259660;TGME49_259660;TGGT1_259660	orotate phosphoribosyltransferase	N/A	0	NaN	NaN	19.0362	NaN	NaN	NaN	NaN	NaN	NaN	0	NaN									2.5573	9	5.3	6.62448	5.84952	5.93388	5.65195	5.89541	5.65728	NaN	5.51929	5.7969	NaN	1	1	1	1	1	1	1	1	1	31.593
	TGVEG_260260;TGME49_260260;TGGT1_260260	ribosomal protein RPP1	N/A	0	22.3945	22.0899	NaN	22.0763	22.9284	22.3594	NaN	22.2286	22.4859	0.206035	-0.115029	+								6.7153	16	43.6	7.58974	6.67325	6.62743	6.13909	6.68634	6.83743	6.85874	6.29726	6.50675	6.64325	2	2	1	3	3	3	1	2	2	18.802
	TGVEG_260320;TGME49_260320;TGGT1_260320	Noc2p family protein	N/A	0	NaN	18.9063	NaN	NaN	NaN	NaN	18.5204	18.9449	18.3107	0	0.314315	+								6.2088	8	4.1	6.35875	5.26853	5.71237	5.56845	5.21756	5.15427	NaN	5.39804	5.58448	5.43287	1	2	2	1	1	1	3	2	2	115.35
	TGVEG_260440;TGME49_260440;TGGT1_260440	nuclear factor NF3	N/A	0	22.796	22.8064	23.3005	22.7872	22.4864	22.2234	23.3123	22.8001	22.615	0.0771504	0.0584831									6.3137	15	10.9	7.76739	6.87243	6.94818	6.92656	6.82446	6.6577	6.73764	6.78968	6.71113	6.76093	2	2	2	3	2	3	2	2	2	33.97
	TGVEG_260500;TGME49_260500;TGGT1_260500	COPI associated protein, putative;putative COPI associated protein	N/A	4	23.7948	24.1587	24.2947	24.2739	23.8238	24.7339	24.4426	24.5	24.6162	1.29818	-0.436849									13.581	35	41.1	8.23608	7.15561	6.84495	7.14373	7.21683	6.89452	7.53058	7.39952	7.38133	7.47116	5	3	4	4	4	5	5	6	6	29.924
	TGVEG_260520;TGME49_260520;TGGT1_260520	hypothetical protein	N/A	0	NaN	NaN	NaN	NaN	NaN	NaN	NaN	NaN	18.5662	0	NaN									1.9562	2	2.3	6.08874	NaN	NaN	NaN	5.65727	NaN	NaN	NaN	5.6349	5.53288	0	0	0	1	0	0	0	1	1	77.122
	TGVEG_260540;TGME49_260540;TGGT1_260540	alveolin domain containing intermediate filament IMC14	N/A	0	21.7483	21.9842	22.152	22.1299	21.8514	21.3169	22.0453	21.5128	21.3305	0.609452	0.332001									11.704	29	16.6	7.46678	6.45892	6.52955	6.71565	6.49766	6.36088	6.68318	6.46055	6.27912	6.44476	4	3	3	3	2	5	3	5	4	83.298
	TGVEG_260630;TGGT1_260630;TGME49_260630	DnaJ family Sec63 protein	N/A	3	23.2297	23.217	23.1705	23.1928	23.0707	22.8607	23.5211	23.3633	23.4252	2.02572	-0.230813									13.165	40	13.9	7.90571	6.99934	7.08615	6.92792	7.06536	6.9713	7.00402	6.80435	6.78077	6.80262	7	7	7	8	7	8	5	4	4	76.759
	TGGT1_260850;TGVEG_260850;TGME49_260850	mitochondrial import inner membrane translocase subunit TIM10, putative;putative mitochondrial import inner membrane translocase subunit TIM10	N/A	0	25.1329	24.8016	24.5431	24.8972	25.593	25.2844	NaN	NaN	NaN	0	NaN	+								60.599	27	67.9	8.3078	7.59958	7.45947	7.34939	7.49284	7.62454	7.54668	5.96109	5.9371	6.29769	4	3	4	3	3	3	1	1	2	11.066
	TGVEG_261010;TGME49_261010;TGGT1_261010	putative tat-binding family protein;tat-binding family protein, putative	N/A	0	22.2407	22.1608	22.0632	22.4526	22.1159	22.0014	NaN	21.9383	NaN	0	0.216553									11.388	21	25.7	7.48306	6.55185	6.77597	6.53508	6.84924	6.55765	6.52379	NaN	6.47963	5.61842	4	6	3	5	3	3	0	2	1	46.073
	TGVEG_261210;TGME49_261210;TGGT1_261210	26s proteasome subunit p55, putative;putative 26s proteasome subunit p55	N/A	0	21.8973	21.6478	21.9755	21.8752	21.9584	21.8568	NaN	NaN	NaN	0	NaN									47.822	19	30.3	7.39576	6.59108	6.47854	6.45568	6.26283	6.81531	6.55567	6.4507	NaN	5.51109	5	4	3	4	6	5	2	0	1	55.049
	TGVEG_261250;TGME49_261250;TGGT1_261250	histone H2A1	N/A	0	NaN	NaN	21.8669	NaN	NaN	NaN	NaN	NaN	NaN	0	NaN									2.5277	11	17.8	7.73125	6.7133	6.9184	6.50408	6.71435	6.65142	7.17548	NaN	6.56085	6.951	1	1	1	1	1	1	0	1	1	19.546
	TGGT1_261260B;TGVEG_261260;TGME49_261260	histone lysine demethylase JMJD6a	HMM: MSGQALAAATAAVPSGAAT, NN: MSGQALAAATAAVPSGAAT;HMM: MSGQDLAAATAAVPSGAAT, NN: MSGQDLAAATAAVPSGAAT;N/A	0	NaN	NaN	16.2264	NaN	NaN	NaN	NaN	NaN	NaN	0	NaN									3.5652	0	8.2	5.16411	4.91342	NaN	4.80612	NaN	NaN	NaN	NaN	NaN	NaN	1	0	1	0	0	0	0	0	0	25.707
	TGVEG_261400;TGME49_261400;TGGT1_261400	hypothetical protein	HMM: MENSARVSFSWSRAARPCLHCLGSLFLVLCFTQATLGS, NN: MENSARVSFSWSRAARPCLHCLGSLFLVLCFTQATLGS	0	NaN	NaN	NaN	NaN	NaN	NaN	21.9592	21.6923	NaN	0	NaN									3.4607	9	4.5	7.19989	6.11287	6.2169	6.20412	6.2589	6.15485	6.19137	6.42527	6.38252	6.15485	1	1	1	1	1	1	2	2	1	50.421
	TGVEG_261480;TGGT1_261480;TGME49_261480	phosphatidyl serine synthase	HMM: MSGTAAPRVSAAFASSFSPASHGF, NN: MSGTAAPRVSAAFASSFSPASHGF;HMM: MVKSGSSVSSVSSWIFSPSFSLFLWSTCFLASVDLR, NN: MVKSGSSVSSVSSWIFSPSFSLFLWSTCFLASVDLR	9	NaN	NaN	NaN	NaN	NaN	NaN	22.6763	22.0437	21.7342	0	NaN									2.9818	5	6.3	7.30068	6.3565	6.26406	NaN	6.20227	6.08767	6.35551	6.564	6.45039	6.63396	1	1	0	1	1	1	3	2	3	60.803
	TGVEG_261570;TGME49_261570;TGGT1_261570	ribosomal protein RPL7A	N/A	0	24.7661	24.5633	24.5819	24.8046	24.2164	24.2736	24.5025	24.8531	24.2026	0.232435	0.117727									10.682	34	31.5	8.29409	7.45583	7.41526	7.26769	7.39496	7.16938	7.44935	7.16068	7.36177	7.26722	5	5	4	4	5	6	5	5	6	31.031
	TGVEG_261720;TGME49_261720;TGGT1_261720	metal cation transporter, ZIP family protein	HMM: MATVADDVMSAASWGSRVGAMVVLLCMGLLGA, NN: MATVADDVMSAASWGSRVGAMVVLLCMGLLGAY	8	NaN	NaN	18.1443	NaN	NaN	NaN	NaN	NaN	NaN	0	NaN									3.7332	4	3.6	6.18969	NaN	5.5131	5.38346	NaN	NaN	NaN	5.50591	5.41332	5.60256	0	1	1	0	0	0	1	1	1	47.447
	TGVEG_261760;TGME49_261760;TGGT1_261760	CDP-alcohol phosphatidyltransferase superfamily protein	N/A	7;8	NaN	NaN	NaN	NaN	NaN	NaN	NaN	NaN	19.9016	0	NaN									2.2373	2	3.8	6.76388	NaN	NaN	NaN	5.97793	6.08913	5.94786	5.93401	6.00903	5.93488	0	0	0	1	1	1	1	1	1	49.393
	TGVEG_261950;TGME49_261950;TGGT1_261950	ATP synthase beta subunit ATP-B	N/A	0	24.3191	24.2427	24.1658	24.3757	24.0265	24.1166	24.0424	24.2477	24.0342	0.746574	0.134465									35.949	60	42.1	8.18766	7.30198	7.27056	7.20847	7.27552	6.99851	7.3069	7.14317	7.32212	7.18196	6	5	6	5	6	9	8	9	8	59.916
	TGVEG_262040;TGME49_262040;TGGT1_262040	SAC3/GANP family protein	N/A	0	24.3005	24.4615	24.5072	24.3784	24.0172	24.2485	24.4235	24.3867	24.2165	0.379638	0.0808093									17.923	55	49.1	8.23244	7.33919	7.41637	7.30382	7.31672	6.99447	7.42508	7.11564	7.22074	7.19959	7	7	6	8	5	9	6	6	6	29.693
	TGVEG_262050;TGGT1_262050;TGME49_262050	rhoptry kinase family protein ROP39	HMM: MSKPFFPQVRVSCTGGVLNLRRHWLRVGNMSRSFAPTVLFVLLNVGGGL, NN: MSKPFFPQVRVSCTGGVLNLRRHWLRVGNMSRSFAPTVLFVLLNVGGGL;HMM: MSKPFFPQVWVSCTGGVLNLRRHWLRVGNMSRAFAPTVLFVLLNVGGSL, NN: MSKPFFPQVWVSCTGGVLNLRRHWLRVGNMSRAFAPTVLFVLLNVGGSL	0	NaN	NaN	NaN	20.9075	NaN	NaN	NaN	NaN	NaN	0	NaN									5.6826	3	8	6.25983	NaN	NaN	NaN	6.25983	NaN	NaN	NaN	NaN	NaN	0	0	0	3	0	0	0	0	0	65.118
	TGVEG_262380;TGME49_262380;TGGT1_262380	elongation factor Tu, putative;putative elongation factor Tu	HMM: MATNLILRFRVGVSRPHTAAVGAAVPFCRASVAV, NN: MATNLILRFRVGVSRPHTAAVGAAVPFCRASVAV	0	NaN	NaN	NaN	NaN	NaN	NaN	20.5817	20.5533	20.4828	0	NaN									5.9852	7	13.8	6.75265	5.59674	5.63072	5.41078	5.48892	5.4512	5.75007	6.00843	6.03443	6.1214	1	1	1	2	1	2	2	2	2	59.672
	TGVEG_262620;TGME49_262620;TGGT1_262620	RNA recognition motif-containing protein	N/A	0	25.8144	25.8547	26.0585	25.6259	25.5116	25.7137	26.0637	25.808	25.4332	0.287189	0.140878									59.357	78	36.9	8.66304	7.7746	7.8087	7.71177	7.64043	7.52838	7.87714	7.6358	7.66381	7.63113	9	9	8	8	7	9	9	9	10	31.76
	TGVEG_262670;TGME49_262670;TGGT1_262670	ribosomal protein RPL18A	N/A	0	25.4091	25.0596	25.2542	25.7106	25.2278	24.8935	25.3553	25.7754	24.8604	0.114662	-0.0894051									24.241	65	40.4	8.54881	7.6287	7.61337	7.55275	7.81586	7.61008	7.46855	7.43843	7.68559	7.3622	6	6	6	6	6	6	6	6	6	21.33
	TGVEG_262690;TGGT1_262690;TGME49_262690	ribosomal protein RPL27	N/A	0	24.5029	24.6309	24.9016	24.3189	23.9394	24.4246	24.8291	24.5159	24.4693	0.171024	0.0737222									17.264	38	29.6	8.27798	7.21208	7.29537	7.29037	7.37676	7.13446	7.47414	7.32558	7.36665	7.35116	4	4	4	5	4	5	5	5	4	16.33
	TGVEG_262710;TGGT1_262710;TGME49_262710	Ctr copper transporter family protein	N/A	3	23.1096	23.2432	23.1801	23.0574	23.1073	22.7456	23.5327	23.1452	23.1294	0.265837	-0.0914345									7.7035	17	16	7.85957	6.89081	6.95184	6.85878	6.90356	6.86471	6.90027	6.91164	6.8797	6.97317	2	2	2	2	2	2	4	3	4	40.734
	TGVEG_262980;TGME49_262980;TGGT1_262980	hypothetical protein;putative transmembrane protein	N/A	1	NaN	NaN	19.2908	NaN	NaN	NaN	NaN	NaN	NaN	0	NaN									1.7953	1	6.5	6.27926	5.84194	NaN	5.7286	NaN	NaN	5.82734	NaN	NaN	NaN	1	0	1	0	0	1	0	0	0	30.923
	TGVEG_263040;TGME49_263040;TGGT1_263040	ribosomal protein RPS16	N/A	0	24.2711	24.2654	24.0571	24.1911	23.8294	23.95	24.1975	24.4153	23.473	0.225572	0.169291									7.5257	23	24.2	8.16622	7.35555	7.40312	7.23109	7.31494	7.15063	7.31444	6.89896	7.05173	6.84636	4	4	4	4	4	4	2	2	2	24.055
	TGVEG_263050;TGME49_263050;TGGT1_263050	ribosomal protein RPL13	N/A	0	24.9909	24.7049	24.815	24.6972	25.0925	24.4573	25.1475	25.0252	24.5634	0.141687	-0.0751012									23.486	62	25.6	8.37627	7.40057	7.39566	7.3267	7.41273	7.37295	7.50961	7.37075	7.54766	7.41527	6	6	6	8	6	9	6	8	8	39.682
	TGVEG_263070;TGME49_263070;TGGT1_263070	CMGC kinase, CK2 family	N/A	0	21.7573	21.9684	21.7034	21.919	21.9494	21.2101	21.7395	22.2534	21.7973	0.264821	-0.120399									7.9079	27	10.2	7.47176	6.57416	6.68194	6.47815	6.58686	6.35921	6.46316	6.37205	6.59316	6.43735	3	3	3	3	2	3	3	3	2	59.808
	TGVEG_263090;TGME49_263090;TGGT1_263090	14-3-3 protein	N/A	0	28.4973	28.596	28.5986	28.524	28.6889	28.4728	28.6862	28.5253	28.4184	0.0866556	0.0206712									154.94	179	55.4	9.52214	8.59261	8.64968	8.55683	8.60032	8.56374	8.65312	8.46136	8.48376	8.50659	12	13	13	14	13	14	12	12	13	37.173
	TGVEG_263130;TGME49_263130;TGGT1_263130	citrate synthase, putative;putative citrate synthase	N/A	0	NaN	18.6899	NaN	NaN	NaN	NaN	NaN	NaN	NaN	0	NaN									2.5622	2	2.4	6.20205	5.47576	5.6576	NaN	NaN	NaN	NaN	5.30619	5.44037	5.55717	1	1	0	0	0	0	1	1	1	69.011
	TGVEG_263180;TGME49_263180;TGGT1_263180	myosin D	N/A	0	22.688	22.7	22.649	22.655	22.4632	22.3874	22.7165	22.4881	22.6196	0.449331	0.0709623									20.708	31	19.6	7.7141	6.90385	7.04809	6.7583	6.79813	6.62124	6.70626	6.55903	6.53182	6.63182	6	7	6	6	4	4	4	4	5	91.051
	TGVEG_263190;TGME49_263190;TGGT1_263190	adenylosuccinate lyase, putative;putative adenylosuccinate lyase	HMM: MAPPSACAAPASAGVCAA, NN: MAPPSACAAPASAGVCAAE;HMM: MAPPSACAAPTSAGVCAA, NN: MAPPSACAAPTSAGVCAAE	0	NaN	NaN	NaN	NaN	NaN	NaN	19.3731	19.7555	NaN	0	NaN									3.2325	6	5.8	6.4137	5.60418	NaN	5.43048	NaN	5.69317	NaN	5.62281	5.82856	5.52397	1	1	1	0	1	0	2	2	1	55.274
	TGVEG_263270;TGME49_263270;TGGT1_263270	glycerophosphodiester phosphodiesterase family protein	N/A	6	NaN	NaN	19.4824	NaN	NaN	NaN	NaN	NaN	NaN	0	NaN									3.5667	7	2.1	6.46616	NaN	5.75851	5.78626	NaN	NaN	NaN	5.64407	5.68556	5.91117	1	1	1	0	0	0	1	1	1	95.969
	TGVEG_263300;TGME49_263300;TGGT1_263300	eukaryotic porin protein	N/A	0	26.5846	26.5809	26.5992	26.6283	26.5483	26.3369	26.9509	26.6776	26.5852	0.610823	-0.149683									95.329	106	57.2	8.91791	7.96717	7.98267	7.88714	8.02032	7.99286	8.04191	7.88383	7.88243	7.98117	10	11	11	13	12	13	13	11	11	31.352
	TGVEG_263500;TGME49_263500;TGGT1_263500	putative vacuolar protein sorting-associated protein 26;vacuolar protein sorting-associated protein 26, putative	N/A	0	NaN	NaN	19.0986	NaN	NaN	NaN	NaN	NaN	NaN	0	NaN									1.7169	2	3.5	6.25909	5.86165	NaN	5.67072	NaN	NaN	NaN	5.46474	5.51665	NaN	1	0	1	0	0	0	1	1	0	42.382
	TGVEG_263530;TGME49_263530;TGGT1_263530	chaperonin, putative;putative chaperonin	N/A	0	NaN	NaN	NaN	NaN	NaN	NaN	22.0052	21.7679	21.6361	0	NaN									3.8797	7	26	7.21471	6.13351	6.17978	NaN	6.31551	5.99362	6.36092	6.41256	6.45889	6.43311	1	1	0	2	2	2	2	2	2	13.832
	TGVEG_263580;TGME49_263580;TGGT1_263580	bromodomain-containing protein	N/A	0	NaN	NaN	18.7964	NaN	NaN	NaN	NaN	NaN	NaN	0	NaN									2.6674	2	2.8	6.27107	NaN	5.67742	5.57975	5.6822	NaN	5.72419	NaN	NaN	NaN	0	1	1	1	0	1	0	0	0	76.466
	TGVEG_263630;TGME49_263630;TGGT1_263630	hypothetical protein	HMM: MLEVKRRSFSVSFRFLLSFLLQRTTPTLGC, NN: MLEVKRRSFSVSFRFLLSFLLQRTTPT	0	NaN	NaN	NaN	NaN	NaN	NaN	NaN	NaN	18.2337	0	NaN									1.6149	1	9.6	5.91173	NaN	NaN	NaN	NaN	NaN	NaN	5.2903	5.54414	5.43281	0	0	0	0	0	0	1	1	1	15.488
	TGVEG_263660;TGME49_263660;TGGT1_263660	hypothetical protein;putative transmembrane protein	N/A	4	NaN	19.4712	NaN	NaN	NaN	NaN	NaN	NaN	NaN	0	NaN									1.9102	4	7.1	6.737	5.97063	5.89282	NaN	NaN	NaN	NaN	6.04151	6.2316	5.97169	1	1	0	0	0	0	1	1	1	30.045
	TGVEG_263700;TGME49_263700;TGGT1_263700	ribosomal protein RPS14	N/A	0	24.5684	24.7515	24.698	24.5806	24.5812	24.1253	24.6958	24.5937	24.014	0.470651	0.238119									18.787	33	47.4	8.28472	7.44553	7.45139	7.30595	7.46397	7.26045	7.2997	7.21922	7.26328	7.14832	4	4	4	4	3	3	3	3	3	16.301
	TGME49_263810;TGGT1_263810;TGVEG_263810	hypothetical protein;putative transmembrane protein	N/A	1	21.2157	21.1037	21.4443	21.2305	21.4811	21.6829	NaN	NaN	NaN	0	NaN									7.2167	17	21.1	7.30341	6.37234	6.33076	6.33979	6.33568	6.45769	6.81457	5.92986	5.71055	5.69983	2	2	2	2	2	2	1	1	1	23.635
	TGME49_263820;TGGT1_263820;TGVEG_263820	DEAD/DEAH box helicase domain-containing protein	N/A	0	21.7769	21.9614	21.6888	21.7948	22.1803	21.6756	22.1051	21.522	21.9475	0.0913687	-0.049181									6.0694	15	2.6	7.47188	6.3274	6.41711	6.23101	6.56196	6.62394	6.60877	6.55995	6.47586	6.66856	2	2	2	2	2	2	2	2	2	116.02
	TGVEG_263840;TGME49_263840;TGGT1_263840	hypothetical protein	N/A	0	NaN	NaN	21.1578	NaN	NaN	NaN	NaN	NaN	NaN	0	NaN									2.411	4	1.1	7.10483	6.26207	6.23543	6.29061	NaN	NaN	6.18241	6.31919	6.16882	6.33183	1	1	1	0	0	1	1	1	1	102.51
	TGVEG_263870;TGGT1_263870;TGME49_263870	glutamate-tRNA ligase	N/A	0	22.8767	22.7802	22.8876	22.9486	22.8964	22.6034	23.3782	23.0674	22.7673	0.548841	-0.222832									11.829	31	11.4	7.79447	6.95481	6.88077	6.67903	6.97471	6.68216	6.86409	6.89264	6.84522	6.65725	5	5	4	5	4	4	6	6	4	92.524
	TGVEG_264040;TGME49_264040;TGGT1_264040	hypothetical protein	HMM: MLRTSLLLRFAGAPIVSSTRGA, NN: MLRTSLLLRFAGAPIVSSTRGA	0	NaN	NaN	19.0866	NaN	NaN	NaN	NaN	NaN	NaN	0	NaN									5.4059	5	9.1	6.58362	5.7396	5.87524	5.66713	NaN	NaN	NaN	5.69089	5.92279	5.87028	1	1	1	0	1	0	1	1	1	24.581
	TGVEG_264600;TGME49_264600;TGGT1_264600	hypothetical protein;putative transmembrane protein	N/A	4	22.5139	22.1711	22.0818	22.2537	22.6138	22.1948	22.0206	22.0626	22.2747	0.37223	0.136305									17.422	17	18.9	7.60335	6.74273	6.67139	6.53706	6.62816	6.65982	6.79992	6.48409	6.48653	6.71713	2	2	2	2	2	3	3	2	3	23.87
	TGVEG_264610;TGME49_264610;TGGT1_264610	RNA recognition motif-containing protein	N/A	0	NaN	NaN	21.2847	NaN	NaN	NaN	NaN	NaN	NaN	0	NaN									2.5316	9	3.7	7.20466	6.34001	6.37871	6.32881	6.2565	6.11909	6.19662	6.18161	6.16729	6.21115	1	1	1	1	1	1	1	1	1	45.032
	TGVEG_264820;TGME49_264820;TGGT1_264820	RbAp48	N/A	0	NaN	18.3575	NaN	NaN	NaN	NaN	NaN	NaN	NaN	0	NaN									1.7394	3	2.6	6.05469	5.88829	5.55758	NaN	NaN	NaN	NaN	NaN	NaN	NaN	1	1	1	0	0	0	0	0	0	98.464
	TGGT1_264830;TGVEG_264830;TGME49_264830	hypothetical protein	N/A	0	20.904	20.3051	20.2136	20.2195	20.6292	21.4537	20.1998	20.8791	21.2418	0.329091	-0.299347									36.439	18	9.3	7.15482	6.29656	6.15342	6.03487	6.06636	6.26371	6.53148	5.90384	6.17044	6.04661	3	3	3	3	4	3	3	4	3	136.57
	TGVEG_265180;TGME49_265180;TGGT1_265180	hypothetical protein	N/A	0	NaN	NaN	NaN	NaN	NaN	NaN	NaN	NaN	18.8388	0	NaN									1.4956	1	3.5	5.61495	NaN	NaN	NaN	NaN	NaN	NaN	NaN	NaN	5.61495	0	0	0	0	0	0	0	0	1	48.4
	TGVEG_265330;TGME49_265330;TGGT1_265330	cell-cycle-associated protein kinase GSK, putative;putative cell-cycle-associated protein kinase GSK	N/A	0	NaN	NaN	19.6672	NaN	NaN	NaN	NaN	NaN	NaN	0	NaN									4.1838	6	12.2	6.67678	5.96294	5.81595	5.84188	5.94885	5.92859	5.87276	NaN	NaN	NaN	2	1	1	3	2	1	0	0	0	44.467
	TGVEG_265370;TGME49_265370;TGGT1_265370	hypothetical protein	N/A	0	NaN	NaN	NaN	NaN	NaN	20.5089	NaN	NaN	NaN	0	NaN									3.3724	5	19.7	6.80802	NaN	NaN	NaN	6.26891	6.03479	6.22123	5.82352	5.80209	5.71776	0	0	0	2	2	2	1	1	1	16.033
	TGVEG_265450;TGME49_265450;TGGT1_265450	hexokinase	N/A	0	NaN	23.7444	23.6515	23.9401	23.5425	23.6762	23.2142	23.3449	23.3506	2.00822	0.39474									26.234	29	23.9	7.96257	6.79893	6.9342	6.6332	7.19268	7.03044	7.0944	7.00139	6.98943	7.14703	2	3	2	6	5	4	7	6	7	51.467
	TGVEG_266060;TGME49_266060;TGGT1_266060	ribosomal protein RPSA	N/A	0	25.2742	25.5291	25.4599	25.4083	25.3315	25.075	25.6148	25.4598	25.0275	0.100608	0.0536582									62.102	75	48.8	8.53969	7.58547	7.7378	7.43941	7.72217	7.57958	7.71155	7.44897	7.50695	7.36845	7	8	6	9	8	9	7	7	6	31.512
	TGVEG_266070;TGME49_266070;TGGT1_266070	ribosomal protein RPL31	N/A	0	24.3058	24.26	23.9163	24.2507	NaN	23.9769	22.9928	24.0871	24.221	0.409937	0.393759									6.9776	20	26.7	8.12136	7.22337	7.34361	7.18435	7.26373	6.6388	7.2865	6.7326	7.13312	7.23366	2	3	3	3	1	3	3	3	3	14.355
	TGGT1_266080;TGVEG_266080;TGME49_266080	hypothetical protein	N/A	0	20.6172	20.6587	20.7453	NaN	NaN	NaN	NaN	NaN	NaN	0	NaN									4.1629	7	6	6.98823	6.18831	6.24964	6.1829	6.11438	6.17102	6.20396	5.70412	NaN	NaN	2	3	2	2	2	2	1	0	0	81.281
	TGVEG_266090;TGME49_266090;TGGT1_266090	hypothetical protein;putative transmembrane protein	HMM: MLGTFCGESNRDECGNRWSRMCNFFWWCSFVVAAGTLAL, NN: MLGTFCGESNRDECGNRWSRMCNFFWWCSFVVAA	4	22.8939	23.7315	23.5391	23.3466	23.3556	23.6014	24.05	23.5637	23.1489	0.213032	-0.199391									9.6945	25	12.2	7.96486	6.90356	7.11321	6.97857	7.02235	6.96716	6.9514	7.07726	7.09314	6.93664	3	3	3	3	3	3	4	4	3	49.58
	TGVEG_266620;TGME49_266620;TGGT1_266620	thioredoxin domain-containing protein	HMM: MICIGPVCVPIWQLGIVGAF, NN: MICIGPVCVPIWQLGIVGAF	0	NaN	NaN	NaN	NaN	NaN	22.0103	NaN	NaN	NaN	0	NaN									7.1499	8	27.1	7.14211	NaN	6.36346	NaN	6.08171	6.1261	6.67321	5.9948	6.12584	6.29702	0	1	1	1	1	3	1	1	1	22.685
	TGVEG_266640;TGME49_266640;TGGT1_266640	Acetyl-coenzyme A synthetase 2, putative;putative Acetyl-coenzyme A synthetase 2	N/A	0	22.4628	22.3869	22.0997	22.5276	22.2228	21.9649	22.2287	22.1929	22.7855	0.144022	-0.0859241									8.6761	18	8.3	7.62665	6.76556	6.93267	6.67481	6.51483	6.32336	6.40394	6.48229	6.69227	6.86549	3	4	3	2	2	2	3	4	4	79.99
	TGVEG_266960;TGME49_266960;TGGT1_266960	beta tubulin;beta-tubulin	N/A	0	25.4482	25.5288	25.5407	25.556	25.2741	25.4127	25.597	25.4194	25.2585	0.326225	0.0809415									33.913	84	44.1	8.58476	7.68262	7.65022	7.64638	7.729	7.47277	7.75201	7.54336	7.6014	7.51299	9	7	8	9	8	11	8	11	9	50.073
	TGVEG_266990;TGME49_266990;TGGT1_266990	beta-COP	N/A	0	21.5317	21.6005	21.5235	21.5991	21.7637	22.065	21.9554	21.2857	21.2923	0.0633935	0.0407505									11.602	21	12.1	7.42113	6.51825	6.58514	6.42927	6.60398	6.30354	6.5827	6.38182	6.25105	6.39653	5	5	3	5	2	4	3	3	5	121.97
	TGVEG_267060;TGME49_267060;TGGT1_267060	ribosomal protein RPL14	N/A	0	23.0027	23.4558	23.4395	23.1379	22.9725	22.5584	23.0971	23.1147	22.3961	0.702193	0.430026	+								5.3329	26	27.4	7.84485	6.9876	7.12924	7.01628	6.94066	6.63646	6.86189	6.75575	6.84712	6.523	4	4	4	3	3	3	3	3	3	17.878
	TGVEG_267070;TGGT1_267070;TGME49_267070	aquaporin 2	N/A	11	20.1971	19.5461	19.7273	19.8286	20.3996	20.3154	NaN	NaN	NaN	0	NaN									11.54	10	8.7	6.86325	6.06848	5.93119	5.77811	5.94698	6.04226	6.18868	5.10195	5.20941	5.93187	2	2	2	2	2	2	1	1	1	44.404
	TGGT1_367060;TGME49_267140;TGGT1_267140;TGGT1_267160;TGME49_267160;TGVEG_267140	SAG-related sequence protein SRS38D;SAG-related sequence SRS38B;SAG-related sequence SRS38D	HMM: MANTIMMGEVSVAKARSSTTPFSLARVVKVRLSSASRLGCVALLLLASATGL, NN: MANTIMMGEVSVAKARSSTTPFSLARVVKVRLSSASRLGCVALLLLASATGL;HMM: MASVSLGSPAATKAAASASRPPVMGGVPVKLHLASRLGLVSLLLVATTAGLLGY, NN: MASVSLGSPAATKAAASASRPPVMGGVPVKLHLASRLGLVSLLLVATTAG;HMM: MASVSLGSPAVIKAAASASRPPVMRVVPVKLHLAFRLGLLSLLLVATMAGLLGY, NN: MASVSLGSPAVIKAAASASRPPVMRVVPVKLHLAFRLGLLSLLLVATMAG;HMM: MAYTIMVGEVSVAKARSSTTPCSLARVVKVRLSSASRLGCVTLLLL…	0;2	NaN	NaN	NaN	NaN	NaN	NaN	NaN	21.3705	20.9778	0	NaN									3.445	5	14	6.76729	NaN	NaN	NaN	5.776	NaN	5.97782	5.64696	6.32298	6.24485	0	0	0	1	0	1	1	2	2	22.97
	TGVEG_267300;TGME49_267300;TGGT1_267300	COPI associated protein;hypothetical protein	N/A	4	NaN	19.218	NaN	NaN	NaN	NaN	NaN	NaN	NaN	0	NaN									2.3934	8	5.3	6.62951	5.77854	5.81659	NaN	5.87221	NaN	5.80996	5.75441	5.59633	5.81387	1	1	1	1	0	1	1	1	1	28.915
	TGVEG_267400;TGME49_267400;TGGT1_267400	ribosomal protein RPL32	N/A	0	24.615	24.3845	24.7767	24.6687	24.1074	24.2156	24.939	24.9525	24.3545	0.276404	-0.156622									11.731	36	41.8	8.30051	7.40838	7.41054	7.25271	7.47769	7.20648	7.39931	7.26762	7.29881	7.32006	5	5	4	6	5	5	4	3	5	15.617
	TGVEG_267430;TGME49_267430;TGGT1_267430	DnaJ domain-containing protein	N/A	4	NaN	NaN	21.5894	21.2123	20.9569	21.1149	NaN	NaN	NaN	0	NaN									8.0574	13	15.8	7.15951	5.97955	6.27763	6.40081	6.39407	6.1608	6.41254	5.90909	5.97853	5.90216	1	4	2	2	2	2	1	1	2	48.936
	TGVEG_267620;TGME49_267620;TGGT1_267620	multi-pass transmembrane protein	N/A	3	NaN	NaN	NaN	NaN	NaN	19.8046	NaN	NaN	NaN	0	NaN									2.9198	3	7.5	6.00924	NaN	NaN	NaN	NaN	NaN	6.00924	NaN	NaN	NaN	0	0	0	1	0	1	0	0	0	57.684
	TGVEG_268200;TGME49_268200;TGGT1_268200	RNA recognition motif-containing protein	N/A	0	NaN	21.9106	NaN	NaN	NaN	NaN	NaN	NaN	NaN	0	NaN									4.0951	10	6.9	7.28713	6.24849	6.62715	6.36515	6.40664	6.3369	6.28303	6.11391	6.27166	6.09022	1	2	1	1	1	2	1	1	2	66.429
	TGVEG_268570;TGME49_268570;TGGT1_268570	zinc finger (CCCH type) motif-containing protein	N/A	0	NaN	NaN	NaN	NaN	NaN	NaN	NaN	20.273	NaN	0	NaN									4.8478	3	8	6.1337	NaN	NaN	NaN	NaN	NaN	NaN	5.60271	5.98221	NaN	0	0	1	0	0	0	2	1	0	47.062
	TGVEG_268590;TGGT1_268590;TGME49_268590	rhomboid protease ROM4	HMM: MHEASEGEIYFPVLVLTLRMVLVQVWTSAVVMAS, NN: MHEASEGEIYFPVLVLTLRMVLVQVWTSAVVMAS;HMM: MHEASEGEIYFPVLVLTLRVVLVQVWTSAVVMAS, NN: MHEASEGEIYFPVLVLTLRVVLVQVWTSAVVMAS	6	22.4032	22.7982	23.2334	22.4511	23.0723	23.1448	23.7297	22.7986	23.0663	0.455152	-0.386587									21.207	26	15.5	7.82625	6.59012	6.79717	6.80739	6.56666	6.75595	6.94903	6.95077	6.83525	7.21476	2	4	2	2	3	3	5	5	7	72.385
	TGVEG_268790;TGME49_268790;TGGT1_268790	hypothetical protein	HMM: MMIRISGHVCGGGRPGIPRWKSVLRKSIASFCFFVACKTWPGFVSCS, NN: MMIRISGHVCGGGRPGIPRWKSVLRKSIASFCFFVACKTW;HMM: MMIRISGHVCGGGRPGIPRWKSVLRKYIASFCFFVACKTWPGFVSCS, NN: MMIRISGHVCGGGRPGIPRWKSVLRKYIASFCFFVACKTW	0	NaN	NaN	20.3577	NaN	19.9919	NaN	NaN	NaN	NaN	0	NaN									3.5516	9	8.3	6.66234	5.635	5.62015	6.04984	5.75869	5.90494	5.69832	NaN	5.55108	5.59481	1	1	2	2	2	1	1	2	1	27.275
	TGVEG_268830;TGME49_268830;TGGT1_268835;TGVEG_268835	hypothetical protein	HMM: MQALRRGAAIPSRLLPRRDSWMSLAPFVAPNNAA, NN: MQALRRGAAIPSRLLPRRDSWMSLAPFVAPNNAAA;N/A	0	22.5603	22.2816	21.675	22.2508	22.6957	22.6723	22.2335	21.8991	22.4445	0.0218816	-0.0200526									14.476	34	24.1	7.65409	6.60835	7.0187	6.46003	6.78877	6.82276	6.75053	6.56477	6.58187	6.25302	6	5	4	5	3	5	5	4	3	61.254
	TGVEG_268850;TGME49_268850;TGGT1_268850;TGVEG_268860;TGME49_268860;TGGT1_268860	enolase 1;enolase 2	N/A	0	26.737	26.767	26.6443	26.8148	26.8605	26.8519	26.8729	26.8197	26.5181	0.062066	-0.0208187									129.39	105	54.1	8.96499	8.05319	8.10961	7.95531	8.04852	7.97754	8.16923	7.83629	7.94405	7.90111	12	13	13	12	11	14	10	11	11	52.113
	TGVEG_268870;TGME49_268870;TGGT1_268870	tetratricopeptide repeat-containing protein	N/A	0	NaN	20.6612	NaN	NaN	NaN	NaN	NaN	NaN	NaN	0	NaN									8.9209	14	10.2	6.9343	5.75504	6.25105	5.97994	6.06577	5.91661	NaN	6.19321	6.2407	NaN	2	3	2	1	1	1	3	3	0	114.11
	TGVEG_268890;TGME49_268890;TGGT1_268890	citrate synthase I	HMM: MLLSRLRDTAAAALVLRTSGSTAL, NN: MLLSRLRDTAAAALVLRTSGSTAL	0	21.7591	21.6115	21.6168	21.8128	NaN	21.5141	NaN	21.6187	NaN	0	0.0437133									5.0011	17	8.2	7.36412	6.52135	6.50195	6.5652	6.5756	6.2599	6.48844	6.03435	6.35156	5.9837	2	2	3	2	1	3	1	2	1	60.42
	TGVEG_268950;TGGT1_268950;TGME49_268950	hypothetical protein;la domain protein	N/A	0	NaN	NaN	NaN	NaN	NaN	NaN	21.7851	21.9274	NaN	0	NaN									11.444	9	9.2	7.06874	5.92523	5.95143	5.69717	5.87809	5.72793	6.46307	6.33612	6.49388	NaN	2	1	2	2	1	2	2	2	0	60.167
	TGVEG_268960;TGME49_268960;TGGT1_268960	5'-AMP-activated protein kinase subunit beta-1 family protein, putative;putative 5'-AMP-activated protein kinase subunit beta-1 family protein	N/A	0	NaN	NaN	21.5884	NaN	NaN	NaN	NaN	NaN	NaN	0	NaN	+								3.0657	3	17.6	6.69036	6.10428	5.99942	6.42024	NaN	NaN	NaN	NaN	NaN	NaN	2	1	2	0	0	0	0	0	0	41.644
	TGGT1_268980	hypothetical protein	HMM: MTSLLWIEVFAGVGGCFLLFVIVTAV, NN: MTSLLWIEVFAGVGGCFLLFVIVTAV	1	NaN	NaN	NaN	NaN	NaN	NaN	NaN	NaN	19.3483	0	NaN									1.7516	1	8.6	6.17554	NaN	NaN	NaN	NaN	NaN	NaN	5.70618	5.60546	5.76833	0	0	0	0	0	0	1	1	1	19.872
	TGVEG_269180;TGME49_269180;TGGT1_269180	MIF4G domain-containing protein	N/A	0	NaN	NaN	NaN	19.3071	NaN	NaN	NaN	NaN	NaN	0	NaN									1.7077	3	1.2	6.48978	6.16679	6.00881	NaN	5.77809	NaN	NaN	NaN	NaN	NaN	1	1	0	1	1	0	0	0	0	272.97
	TGME49_269190;TGGT1_269190;TGVEG_269190	glyceraldehyde-3-phosphate dehydrogenase GAPDH2	HMM: MSLYPRSSVRLRTRGLFFSSSLPLSHCLFLALFLFLSFDNFLPTSRSL, NN: MSLYPRSSVRLRTRGLFFSSSLPLSHCLFLALFLFLSFDNFLPTSRSL;HMM: MSLYPRSSVRLRTRGLFFSSSLPLSHCLFLALFLFLSLDNFLPTSRSL, NN: MSLYPRSSVRLRTRGLFFSSSLPLSHCLFLALFLFLSLD	1	22.5833	22.7214	22.891	22.6262	22.5055	22.7315	23.1006	22.937	22.7069	0.560668	-0.182924									14.208	46	11.8	7.75526	6.94401	7.00381	6.8917	6.76831	6.6615	6.75925	6.7071	6.69475	6.60259	6	7	6	6	5	5	6	5	4	105.12
	TGVEG_269442;TGME49_269442;TGGT1_269442	calmodulin, putative;putative calmodulin	N/A	0	24.8063	24.8367	25.1532	24.6668	24.7957	24.6659	25.235	24.9664	24.8867	0.252331	-0.0973008									23.36	39	56.3	8.41036	7.47038	7.47205	7.46274	7.39534	7.36479	7.51925	7.55754	7.36764	7.45567	4	4	4	4	4	4	4	4	4	9.7801
	TGVEG_269690;TGME49_269690;TGGT1_269690	hypothetical protein;putative transmembrane protein	HMM: MRPLRVAVALFWAMVAVVGFWAS, NN: MRPLRVAVALFWAMVAVVGF;HMM: MRPLRVTVALFWAMVAVVGFWAS, NN: MRPLRVTVALFWAMVAVVGF	1	NaN	NaN	NaN	19.9573	19.6593	19.7677	NaN	NaN	NaN	0	NaN									3.672	5	3.5	6.70307	5.83158	5.92584	5.66611	5.97249	5.82037	5.98486	4.96523	5.26536	5.34254	1	1	1	2	2	2	1	1	1	94.306
	TGVEG_269780;TGME49_269780;TGGT1_269780	ADP-ribosylation factor, putative;putative ADP-ribosylation factor	N/A	0	NaN	NaN	22.5495	22.2292	NaN	22.8751	NaN	NaN	NaN	0	NaN	+								4.7119	6	14	7.35297	6.01724	6.00445	6.72387	6.69359	6.37612	6.8965	NaN	NaN	NaN	1	1	2	2	1	2	0	0	0	24.51
	TGVEG_269840;TGME49_269840;TGGT1_269840	proteasome regulatory subunit	N/A	0	NaN	NaN	18.8833	NaN	NaN	NaN	NaN	NaN	NaN	0	NaN									3.3134	4	6.4	6.70173	5.75448	6.03547	5.60592	5.73788	5.63139	5.86829	5.32713	5.74162	5.6972	1	1	1	1	1	1	1	1	1	35.261
	TGGT1_269950;TGVEG_269950;TGME49_269950	hypothetical protein	HMM: MIGLFSSHFLRRHKMAGRASVVVSLLFSASLWSLLSRVDGA, NN: MIGLFSSHFLRRHKMAGRASVVVSLLFSASLWSLLSRVDGA	0	24.9494	25.0413	24.8549	25.0743	24.896	24.6905	25.2388	25.2512	25.0051	1.05464	-0.216519									65.806	120	30.6	8.43212	7.55926	7.58554	7.33472	7.55122	7.29732	7.50746	7.4179	7.45936	7.49901	15	14	14	16	13	17	13	14	12	104.63
	TGVEG_269980;TGME49_269980;TGGT1_269980	preprotein translocase Sec61, putative;putative preprotein translocase Sec61	HMM: MAKGFRFLNLIKPVMCILPEVQAP, NN: MAKGFRFLNLIKPVMCI	8	26.2227	26.2508	26.3459	26.435	26.5352	26.0906	26.7205	26.5041	26.2763	0.784713	-0.227182									43.206	75	26.8	8.83761	7.89266	7.95317	7.82356	7.91606	7.84613	7.9137	7.83483	7.87096	7.88256	10	10	8	9	10	11	8	9	9	52.164
	TGVEG_270220;TGGT1_270220;TGME49_270220	hypothetical protein;putative phosphatidylinositol glycan class V, related protein	HMM: MPTSAQVGKPLKARTSLLRLRLRVLFLAFLSRLLCLSLTCLWAH, NN: MPTSAQVGKPLKARTSLLRLRLRVLFLAFLSRLLCL	6;7	NaN	NaN	17.9158	NaN	NaN	NaN	NaN	NaN	NaN	0	NaN									2.2006	2	2	5.97398	5.60733	NaN	5.31467	NaN	NaN	NaN	5.51928	NaN	NaN	1	0	1	0	0	0	1	0	0	142.52
	TGVEG_270240;TGME49_270240;TGGT1_270240	MAG1;MAG1 protein	HMM: MDCGQCRRQLHAAGVLGLFVTLATATVGLSQ, NN: MDCGQCRRQLHAAGVLGLFVTLATAT	1	24.1487	24.2241	24.414	24.2507	24.5037	23.9778	24.6658	24.451	24.3296	0.806522	-0.219848									75.437	63	24.3	8.22071	7.25686	7.33047	7.26323	7.23317	7.24635	7.30166	7.22253	7.25438	7.2788	6	8	7	6	6	7	8	8	8	49.195
	TGGT1_270250	dense granule protein GRA1	HMM: MVRVSAIVGAAASVFVCLSAGAYAA, NN: MVRVSAIVGAAASVFVCLSAGAYAA	0	NaN	19.9694	NaN	NaN	NaN	NaN	NaN	NaN	NaN	0	NaN									1.4469	1	11.6	6.23837	5.79781	6.04277	NaN	NaN	NaN	NaN	NaN	NaN	NaN	1	1	0	0	0	0	0	0	0	20.149
	TGVEG_270300;TGME49_270300;TGGT1_270300	hypothetical protein;zinc finger, ZZ type protein	N/A	0	NaN	NaN	21.398	NaN	NaN	NaN	NaN	NaN	NaN	0	NaN	+								2.5861	2	8.3	7.04379	NaN	6.61709	6.3629	NaN	6.20496	6.47871	NaN	NaN	NaN	0	2	1	0	1	1	0	0	0	57.966
	TGVEG_270320;TGGT1_270320;TGME49_270320	protein phosphatase 2C domain-containing protein	HMM: MAGPRSPLRFVLLLSLLALKVFVDSPSVLPA, NN: MAGPRSPLRFVLLLSLLALKVFVDSP;HMM: MAGPRSPLRFVLLLSLLAR, NN: MAGPRSPLRFVLLLSLLARKVFVD	0	21.7505	22.1032	22.1582	NaN	NaN	NaN	22.0946	22.1857	21.8263	0.0657868	-0.0315647									6.5814	12	8.4	7.32938	6.47926	6.40993	6.48661	5.69824	NaN	6.02206	6.87965	6.28939	6.20952	3	2	3	1	0	1	3	2	2	58.732
	TGVEG_270380;TGME49_270380;TGGT1_270380	ribosomal protein RPS13	N/A	0	23.6046	23.4654	23.0519	23.4068	23.3199	22.7993	22.9643	23.3814	23.057	0.502155	0.239703	+								8.9355	24	39.1	7.90913	7.14916	7.15625	7.07022	7.00741	6.62042	6.99362	6.74665	6.86371	6.58563	4	4	5	3	2	3	3	3	3	17.176
	TGGT1_270510;TGME49_270510;TGVEG_270510	asparaginyl-tRNA synthetase (NOB+tRNA synthase)	HMM: MPRRCWQLFVCCSVREFPVSVASRLLLPLLFVLASARNSALLYSSALTLRSSAAPLAFSS, NN: MPRRCWQLFVCCSVREFPVSVASRLLLPLLFVLASAR	0	26.5578	26.6188	26.6486	26.7326	26.5229	26.3152	26.773	26.6943	26.4153	0.0593941	-0.0191657									39.307	128	30	8.90087	7.97386	8.06952	7.95557	7.9546	7.82898	7.94118	7.9003	7.97118	7.88199	16	18	17	14	14	15	17	17	16	74.918
	TGVEG_270530;TGME49_270530;TGGT1_270530	ubiquitin fusion degradation protein UFD1CY	N/A	0	21.9638	NaN	NaN	NaN	NaN	NaN	NaN	NaN	NaN	0	NaN									2.8254	2	10.7	6.64461	6.61177	NaN	5.50696	NaN	NaN	NaN	NaN	NaN	NaN	2	0	1	0	0	0	0	0	0	36.503
	TGVEG_270550;TGME49_270550;TGGT1_270550	gamma-glutamyl phosphate reductase, putative;putative gamma-glutamyl phosphate reductase	N/A	0	NaN	19.2881	NaN	NaN	NaN	NaN	NaN	NaN	NaN	0	NaN									3.427	5	6.8	6.32736	5.49896	5.83769	5.06978	5.48038	5.5178	NaN	NaN	5.57082	NaN	1	2	1	1	1	0	0	1	0	54.409
	TGVEG_271050;TGGT1_271050;TGME49_271050	SAG-related sequence SRS34A	HMM: MSFSKTTSLASLALTGLFVVFKFALAS, NN: MSFSKTTSLASLALTGLFVVFKFALAS	0	28.396	28.5972	28.615	28.5133	28.75	28.3993	28.941	28.8424	28.7513	1.59113	-0.308823									136.86	113	42.5	9.52366	8.39761	8.66734	8.50548	8.55777	8.5266	8.66742	8.54734	8.50938	8.66854	6	6	4	5	5	5	6	5	6	18.981
	TGVEG_271270;TGME49_271270;TGGT1_271270	hypothetical protein;putative transmembrane protein	N/A	1	NaN	NaN	NaN	NaN	NaN	NaN	19.9466	NaN	NaN	0	NaN	+								3.4176	1	2.5	5.79824	NaN	NaN	NaN	NaN	NaN	NaN	5.79824	NaN	NaN	0	0	0	0	0	0	1	0	0	93.148
	TGVEG_271810;TGME49_271810;TGGT1_271810	lanp, putative;putative lanp	N/A	0	22.3698	22.2553	22.0656	22.1046	22.1535	22.3715	22.0742	22.0156	22.064	0.923372	0.17896									6.8769	26	18.7	7.57372	6.63473	6.68842	6.51847	6.52658	6.51892	6.79154	6.58016	6.51382	6.70415	3	3	3	3	3	3	4	3	4	31.931
	TGGT1_271820	lipoyltransferase and lipoate-protein ligase subfamily protein	N/A	0	16.4298	NaN	NaN	NaN	NaN	NaN	NaN	NaN	NaN	0	NaN									2.7799	1	5.3	4.94585	4.94585	NaN	NaN	NaN	NaN	NaN	NaN	NaN	NaN	1	0	0	0	0	0	0	0	0	52.553
	TGVEG_271888;TGME49_271888;TGGT1_271888	3-ketoacyl-CoA reductase, putative;putative 3-ketoacyl-CoA reductase	N/A	1;2	23.3512	23.3258	23.5328	23.5553	23.298	23.1681	23.949	23.646	23.3586	0.609441	-0.24793									20.032	46	34.2	7.96453	6.99265	6.87387	6.99265	7.13462	6.93947	7.14073	6.89321	7.03874	7.00432	6	6	6	8	7	8	6	7	6	37.496
	TGGT1_271930;TGVEG_271930;TGME49_271930	hypothetical protein	N/A	0	24.434	24.4217	24.86	24.5812	23.9791	24.6212	24.8463	24.5756	24.6707	0.312	-0.125627									69.242	76	67.5	8.32373	7.49171	7.49903	7.57273	7.31205	6.927	7.44609	7.01368	7.49866	7.07983	7	8	8	7	6	7	6	7	8	26.144
	TGVEG_271970;TGME49_271970;TGGT1_271970	glideosome-associated protein with multiple-membrane spans GAPM3	N/A	5	25.978	25.9743	26.1178	26.1287	25.4875	26.1929	25.9697	26.1229	26.4867	0.456259	-0.169729									29.084	83	26.1	8.82765	7.82304	7.95415	7.95469	7.88699	7.6907	7.98844	7.74289	7.82659	7.90255	4	5	5	5	4	5	5	5	5	34.282
	TGVEG_272290;TGME49_272290;TGGT1_272290	pyruvate dehydrogenase complex subunit PD-HE1Beta	HMM: MAVLDVPLLFAFHFAFALSG, NN: MAVLDVPLLFAFHFAFAL;HMM: MAVLDVPLLFAFHFALALSG, NN: MAVLDVPLLFAFHFALAL	0	NaN	NaN	16.8788	NaN	NaN	NaN	NaN	NaN	NaN	0	NaN									2.7472	2	10.2	5.63784	5.21537	5.22935	5.00251	NaN	NaN	NaN	NaN	NaN	NaN	1	1	2	0	0	0	0	0	0	50.022
	TGVEG_272910;TGME49_272910;TGGT1_272910	T-complex protein 1 delta subunit	N/A	0	23.409	23.6838	23.1408	23.5984	23.4944	23.7435	23.4319	23.4166	23.2497	0.0965149	0.0451107									19.182	53	27.7	7.96767	7.04922	7.26595	6.97375	7.02596	6.917	6.96633	6.93097	6.94355	6.92029	7	8	6	8	7	5	8	7	6	58.644
	TGVEG_273090;TGME49_273090;TGGT1_273090;TGME49_324300;TGVEG_235610;TGME49_235610;TGGT1_235610	ATPase, AAA family protein;cell division protein CDC48CY;transitional endoplasmic reticulum ATPase, putative	HMM: MECLIEATVSTWGNAPPLIACGVCASAATLAQLGAA, NN: MECLIEATVSTWGNAPPLIACGVCASAATLAQ;N/A	0	24.8253	24.8814	24.6717	24.8305	24.8362	24.6566	24.7576	24.8464	24.5343	0.288813	0.0800641									31.667	95	28.2	8.35551	7.48183	7.59055	7.38117	7.38528	7.31612	7.38023	7.32672	7.32207	7.34614	14	14	14	12	13	12	14	12	13	89.396
	TGGT1_273130;TGME49_273130;TGVEG_273130	SAG-related sequence SRS30A	N/A	0	NaN	22.6623	NaN	NaN	NaN	NaN	NaN	NaN	NaN	0	NaN									4.5464	8	11.3	7.45626	NaN	6.85342	6.55745	6.43742	5.96321	NaN	6.98347	6.41511	6.29321	0	2	2	1	1	0	1	1	1	38.496
	TGVEG_273370;TGME49_273370;TGGT1_273370	coatomer gamma 2-subunit protein, putative;putative coatomer gamma 2-subunit protein	N/A	0	22.4072	22.1592	22.3184	22.3945	21.8526	22.1985	22.6731	22.6404	22.236	0.630924	-0.221555									23.952	40	16.8	7.61711	6.79834	6.55635	6.51158	6.53429	6.48471	6.67738	6.61398	6.72872	6.87955	6	5	4	5	3	4	6	7	7	112.29
	TGVEG_273460;TGME49_273460;TGGT1_273460	eukaryotic translation initiation factor 3 subunit 6 interacting protein	N/A	2	24.8205	24.7152	24.6451	24.7067	24.6537	24.2881	24.799	24.6286	24.4044	0.392251	0.116293									38.997	66	36.2	8.31254	7.44562	7.39273	7.29653	7.39086	7.28693	7.40321	7.3408	7.33173	7.30814	7	7	7	8	8	10	10	10	10	75.073
	TGVEG_273520;TGME49_273520;TGGT1_273520	PCI domain-containing protein	N/A	0	24.6618	24.6112	24.5617	24.7223	24.5683	24.2504	25.0658	24.753	24.5711	0.556906	-0.185078									22.291	64	20.6	8.32037	7.45036	7.42377	7.30263	7.4177	7.29975	7.35654	7.30816	7.3505	7.35635	7	7	6	7	6	7	7	7	7	67.341
	TGGT1_273540;TGVEG_273540;TGME49_273540	phosphatidylserine synthase, putative;putative phosphatidylserine synthase	N/A	8	NaN	NaN	NaN	NaN	NaN	NaN	21.1852	20.6911	20.4969	0	NaN									7.7248	11	6.2	7.00376	6.19943	5.85543	5.83885	5.97064	6.07617	5.9518	6.14569	6.15643	6.09489	2	1	1	1	1	1	3	3	3	68.153
	TGVEG_273760;TGGT1_273760;TGME49_273760	heat shock protein HSP70	N/A	0	28.8423	28.9199	28.8748	28.944	28.8349	28.6441	29.0216	28.9085	28.6817	0.027516	0.00839742									180.19	316	60.6	9.58696	8.72987	8.72863	8.6466	8.63018	8.51626	8.62404	8.54808	8.64864	8.57238	33	30	31	27	24	31	25	28	26	72.292
	TGGT1_273905;TGVEG_273905;TGME49_273905	hypothetical protein;putative ARM repeat protein	HMM: MNLFLFFLRFRAIPRSSVLPSQSLLLKTAKRVHSPLFLVYLLLLSAVPAAVTR, NN: MNLFLFFLRFRAIPRSSVLPSQSLLLKTAKRVHSPLFLVYLLLLSAVPAAVTR;N/A	0;2	NaN	20.3469	20.2168	NaN	NaN	20.536	20.4934	20.2056	NaN	0.148702	-0.067646									3.1696	14	5.6	6.89959	5.52862	6.13008	6.10326	5.94237	NaN	6.2061	5.95461	6.10507	5.50905	1	2	2	1	1	2	2	2	2	41.124
	TGVEG_273930;TGME49_273930;TGGT1_273930	DNA topoisomerase domain-containing protein	HMM: MHGAVAAHLFFLQRCFCP, NN: MHGAVAAHLFFLQRCFCPFVFFKMAFFPRLFAD;N/A	0	19.6766	NaN	NaN	NaN	NaN	NaN	NaN	NaN	NaN	0	NaN									1.5	3	3.9	5.92324	5.92324	NaN	NaN	NaN	NaN	NaN	NaN	NaN	NaN	1	1	0	0	0	0	0	1	0	27.997
	TGVEG_274060;TGME49_274060;TGGT1_274060	2-oxoglutarate/malate translocase OMT	N/A	1	NaN	20.3685	NaN	NaN	20.1525	20.2447	NaN	20.1381	NaN	0	0.230391									5.8096	9	20.7	6.88092	5.62473	6.1801	5.90162	6.1321	5.92589	6.09566	NaN	5.992	5.64588	1	2	1	2	2	2	0	3	1	35.041
	TGVEG_274190;TGME49_274190;TGGT1_274190	eukaryotic initiation factor 2B epsilon subunit, putative;putative eukaryotic initiation factor 2B epsilon subunit	HMM: MSAPSSACSAAPASSGGA, NN: MSAPSSACSAAPASSGGA	0	18.5632	NaN	NaN	NaN	NaN	NaN	NaN	NaN	NaN	0	NaN									2.3587	2	1.7	6.09279	5.58808	NaN	NaN	NaN	NaN	NaN	5.57851	5.67389	NaN	1	0	0	0	0	0	1	1	0	88.811
	TGVEG_275568;TGME49_275568;TGGT1_275568	GPI transamidase subunit PIG-U protein	N/A	10	NaN	NaN	19.0282	NaN	NaN	NaN	NaN	NaN	NaN	0	NaN									1.9313	9	2	6.62096	5.74401	5.73067	5.64955	5.84665	5.64897	NaN	5.69048	5.75172	5.63958	1	1	1	1	1	1	1	1	1	60.946
	TGME49_275650;TGGT1_275650;TGVEG_275650	hypothetical protein	N/A	0	24.9415	24.8436	24.7152	24.7198	24.2039	24.8282	24.8187	24.8015	24.8764	0.00606664	0.00128237									40	109	37.9	8.35491	7.57536	7.54737	7.40533	7.29015	6.9963	7.33694	7.41219	7.37011	7.44217	17	15	14	13	8	11	15	15	15	101.16
	TGVEG_275690;TGME49_275690;TGGT1_275690	ClpB, putative;putative ClpB	HMM: MQRSCLQISGCSALYLPMAWPRGLSGPPRGRSRRLTPRGRLLFLRGALLVALVQQTVGH, NN: MQRSCLQISGCSALYLPMAWPRGLSGPPRGRSRRLTPRGRLLFLRGALLVALVQQTVGH;N/A	0;1	23.1876	22.8583	22.9893	23.02	22.9569	NaN	NaN	22.9399	24.0096	0.458134	-0.462991									6.9998	19	7.4	7.84155	7.42045	7.53569	5.94424	6.29068	6.11667	6.00017	5.49984	5.96578	6.37811	3	3	2	4	3	3	2	3	3	114.58
	TGGT1_275802;TGME49_275802;TGVEG_275802	SRP72 RNA-binding domain-containing protein	N/A	0	NaN	NaN	20.0309	NaN	NaN	NaN	NaN	NaN	NaN	0	NaN									4.2403	12	6.6	6.80803	5.95527	5.90307	5.95137	5.8229	5.60927	5.89675	5.67605	5.83072	5.91352	1	1	2	1	2	1	1	1	1	79.907
	TGVEG_275810;TGME49_275810;TGGT1_275810	ribosomal protein RPS10	N/A	0	NaN	23.6271	23.0878	NaN	NaN	NaN	NaN	NaN	NaN	0	NaN									5.9259	11	33.6	7.47927	6.46045	7.14398	6.87144	6.46914	NaN	NaN	NaN	6.31425	5.94741	1	4	4	1	0	1	0	2	1	17.398
	TGVEG_276170;TGME49_276170;TGGT1_276170	phosphatidylinositol 3- and 4-kinase	N/A	0	NaN	NaN	19.086	NaN	NaN	NaN	NaN	NaN	NaN	0	NaN									2.2223	3	1.1	6.36812	5.48477	5.60595	5.66694	5.63683	5.54638	5.5746	NaN	NaN	NaN	1	1	1	1	1	1	0	0	0	134.58
	TGVEG_277000;TGME49_277000;TGGT1_277000	putative transport protein Sec24;transport protein Sec24, putative	N/A	0	21.3922	NaN	20.0689	21.0605	NaN	21.0832	20.773	20.9816	20.8358	0.0928716	-0.132882									52.229	14	5.4	7.13707	6.36309	5.67346	6.01657	6.35976	5.98677	6.26628	6.04131	6.28044	6.25042	2	2	2	3	2	2	2	3	3	108.03
	TGGT1_277270	NTPase II	N/A	0	27.9094	28.0145	27.8363	28.1637	27.7503	27.8129	28.0021	28.2235	27.9143	0.527957	-0.126581									237.35	251	60.2	9.33244	8.42521	8.46892	8.30544	8.47767	8.31965	8.45375	8.14358	8.37858	8.33381	23	23	23	24	24	25	18	22	21	95.782
	TGVEG_277760;TGME49_277760;TGGT1_277760	adenylosuccinate lyase, putative;putative adenylosuccinate lyase	N/A	0	NaN	NaN	NaN	NaN	NaN	NaN	NaN	NaN	18.1126	0	NaN									4.1582	4	4.2	6.41103	NaN	5.81962	NaN	5.46333	5.77027	5.54312	5.35911	5.32141	5.39634	0	1	0	1	1	1	1	1	1	74.233
	TGVEG_278050;TGME49_278050;TGGT1_278050	proteasome subunit alpha type 1, putative;putative proteasome subunit alpha type 1	N/A	0	NaN	NaN	18.9272	NaN	NaN	NaN	NaN	NaN	NaN	0	NaN									1.5848	4	9.3	6.52984	5.77711	5.81843	5.61911	NaN	NaN	5.66297	5.47867	5.67175	5.68431	1	2	1	0	0	1	1	1	1	27.242
	TGGT1_278660;TGVEG_278660;TGME49_278660	P-type ATPase4, putative;putative P-type ATPase4	N/A	8	22.08	22.057	22.0055	22.2717	NaN	22.1145	22.6555	22.1542	22.1406	0.720939	-0.269258									15.942	26	12.5	7.55341	6.71538	6.84163	6.29059	6.48838	6.24042	6.51764	6.60339	6.70321	6.6531	4	6	4	2	1	2	7	7	5	144.66
	TGVEG_278830;TGME49_278830;TGGT1_278830	glucose-6-phosphate 1-dehydrogenase	N/A	0	22.8746	23.0581	22.9491	23.0329	23.4156	22.9094	23.1867	23.3031	22.8999	0.574659	-0.169283									21.019	40	25.4	7.84379	6.8303	6.93969	6.74047	6.99719	6.86232	6.97484	6.81392	6.91747	6.86797	7	9	6	7	6	7	7	7	7	98.279
	TGVEG_278850;TGME49_278850;TGGT1_278850	DHHC zinc finger domain-containing protein	N/A	4	24.1939	24.8125	25.2707	24.1595	24.3187	25.2846	25.0256	25.2548	25.2882	0.596669	-0.430489									15.214	40	18.8	8.43721	7.14498	7.36538	7.31911	7.17415	7.28688	7.64105	7.26162	7.71365	7.83009	3	3	4	4	4	6	4	5	6	40.404
	TGVEG_278870;TGME49_278870;TGGT1_278870	myosin F	N/A	0	20.4596	20.5857	NaN	20.4285	20.6822	20.9562	20.9412	20.3422	20.5306	0.125954	-0.0819947									6.5435	15	4.6	7.08182	6.16367	6.21429	6.07664	6.06318	6.01616	5.84749	6.32921	6.09878	6.17508	3	4	2	3	3	2	5	4	4	216.38
	TGVEG_278990;TGME49_278990;TGGT1_278990	phosphate carrier, putative;putative phosphate carrier	N/A	1	24.6763	24.671	24.5449	24.7247	23.8006	24.5207	24.6504	24.7055	24.6959	0.503672	-0.053215									15.521	47	21.1	8.31033	7.27207	7.44634	7.26921	7.57088	7.29099	7.51484	7.01912	7.12911	7.40951	6	7	7	9	6	9	4	6	7	53.093
	TGGT1_279100	hypothetical protein	HMM: MWRIWRCRLSFLFVTGCLLGALTAGLGS, NN: MWRIWRCRLSFLFVTGCLLGALTA	1	NaN	NaN	NaN	NaN	NaN	NaN	NaN	NaN	20.1468	0	NaN									2.6049	4	28.5	6.66108	NaN	NaN	NaN	NaN	NaN	NaN	6.33405	6.14737	6.00873	0	0	0	0	0	0	1	1	1	47.994
	TGVEG_279380;TGME49_279380;TGGT1_279380	hypothetical protein;putative hydrolase family or acyltransferase family	N/A	0	22.6128	22.3784	22.6041	NaN	NaN	NaN	NaN	NaN	NaN	0	NaN									21.195	17	24.7	7.68411	6.86776	6.84579	6.67743	6.88692	6.72226	6.96479	6.2994	6.34524	6.44143	4	4	3	3	3	3	1	1	1	34.769
	TGVEG_279390;TGME49_279390;TGGT1_279390	proliferation-associated protein 2G4, putative;putative proliferation-associated protein 2G4	N/A	0	25.0339	24.9086	24.9381	25.0446	24.9956	24.6854	25.2461	25.1182	24.8054	0.2852	-0.096337									27.524	76	28.8	8.42549	7.61887	7.581	7.44431	7.54261	7.40458	7.48579	7.32954	7.36335	7.3721	10	10	10	10	8	9	8	8	8	50.292
	TGME49_280380;TGGT1_280380;TGVEG_280380	poly(ADP-ribose) glycohydrolase	HMM: MECHVVRLLVSLLILVPCVCMAQ, NN: MECHVVRLLVSLLILVPCVCMAQ	1	25.3928	25.4087	25.5053	25.5431	25.3639	25.293	25.6651	25.6224	25.3587	0.481936	-0.113162									38.472	99	36.3	8.57163	7.76043	7.68561	7.54741	7.61992	7.57551	7.71324	7.37872	7.59964	7.56706	14	14	14	13	13	15	12	15	13	61.836
	TGVEG_280450;TGME49_280450;TGGT1_280450	hypothetical protein	N/A	0	NaN	NaN	24.0069	NaN	NaN	NaN	NaN	NaN	NaN	0	NaN									1.4582	9	0.8	8.02719	7.14236	7.04618	7.14826	7.06322	6.98509	6.95436	7.11227	7.07726	7.08863	1	1	1	1	1	1	1	1	1	159.23
	TGVEG_280490;TGME49_280490;TGGT1_280490	U-box domain-containing protein	N/A	0	NaN	20.8794	20.1767	20.6035	NaN	NaN	NaN	NaN	NaN	0	NaN									56.399	13	5.5	6.93757	6.05154	6.26658	5.99865	6.21992	5.70942	5.60228	5.86022	5.99762	5.60181	2	3	3	3	1	1	2	2	1	121.96
	TGVEG_280560;TGME49_280560;TGGT1_280560	selenide, water dikinase	N/A	0	NaN	18.6381	NaN	NaN	NaN	NaN	NaN	NaN	NaN	0	NaN									2.3937	1	2.8	6.03623	5.81191	5.64202	NaN	NaN	NaN	NaN	NaN	NaN	NaN	2	2	0	0	0	0	0	0	0	137.67
	TGVEG_280600;TGME49_280600;TGGT1_280600	histidyl-tRNA synthetase (HisRS), putative;putative histidyl-tRNA synthetase (HisRS)	N/A	0	22.5919	22.841	21.9525	22.3229	21.9434	22.3052	21.6698	22.0761	22.0152	0.858177	0.541419									16.327	32	11.6	7.61281	6.80275	6.86458	6.62625	6.80743	6.37751	6.84008	6.33127	6.42262	6.41303	4	4	4	6	5	5	4	4	4	134.86
	TGVEG_280740;TGME49_280740;TGGT1_280740	signal peptidase	N/A	1	20.7073	NaN	21.1296	20.7431	21.0855	20.7358	21.0546	21.0975	21.0297	0.358083	-0.1421									6.6863	14	24.7	7.16923	6.19438	5.99962	6.28459	6.44129	6.32995	6.00578	6.05388	6.15324	6.25686	2	1	2	3	2	2	2	2	3	24.664
	TGVEG_281520;TGME49_281520;TGGT1_281520	zinc finger, C3HC4 type (RING finger) domain-containing protein	N/A	4	21.031	21.0484	21.1246	20.8674	21.017	21.1326	21.1782	20.9807	NaN	0.0465433	-0.0114415									7.2954	14	13	7.2333	6.33766	6.39143	6.30294	6.40788	6.13027	6.49779	6.00856	6.0619	6.09258	2	2	2	3	2	3	2	2	1	41.043
	TGGT1_281580;TGME49_281580;TGVEG_281580;TGVEG_272280;TGME49_272280;TGGT1_272280	PP2C, putative;putative PP2C	N/A	0	26.3243	26.3384	26.3204	26.4751	26.7113	26.2194	26.2472	25.923	25.9956	1.29791	0.272451	+	+	+	+					183.3	165	49.5	8.83003	7.89121	7.94885	7.86122	8.01569	7.98039	7.99804	7.62475	7.61998	7.73328	15	16	17	20	20	21	15	15	16	71.856
	TGGT1_281675;TGME49_281675;TGVEG_281675B;TGVEG_281675A	protein kinase, putative;putative protein kinase	HMM: MTGGAAAPRSSSGASRTPLSLRFSLTLLCSLVALLTLSVSLST, NN: MTGGAAAPRSSSGASRTPLSLRFSLTLLCSLVALLTLSVSL;N/A	0;1	24.5843	24.0057	24.5663	24.2542	24.4536	23.8426	24.666	24.117	24.1535	0.101378	0.0732981									42.65	41	12.5	8.21229	7.39877	7.23256	7.35116	7.24797	7.28463	7.19151	7.21418	7.13008	7.20664	6	5	6	4	6	5	4	5	6	134.01
	TGVEG_282055;TGGT1_282055;TGME49_282055	protein phosphatase PP2C-hn	N/A	0	NaN	NaN	NaN	19.3447	NaN	NaN	NaN	NaN	NaN	0	NaN									1.9993	2	5.2	6.12379	5.85373	NaN	NaN	5.7894	NaN	NaN	NaN	NaN	NaN	1	0	0	1	0	0	0	0	0	51.909
	TGVEG_282170;TGME49_282170;TGGT1_282170	hypothetical protein	N/A	0	NaN	NaN	NaN	NaN	NaN	NaN	NaN	NaN	16.7155	0	NaN									3.6042	2	3.7	5.32377	NaN	NaN	NaN	NaN	NaN	5.06513	NaN	NaN	4.97575	0	0	0	0	0	1	0	0	1	61.256
	TGVEG_283510;TGGT1_283510;TGME49_283510	hypothetical protein	N/A	0	24.3966	24.2602	24.563	24.4726	25.002	24.2773	24.69	24.6863	24.3817	0.596258	-0.179382									29.136	65	36.3	8.29201	7.34038	7.45237	7.44915	7.13615	7.39709	7.21796	7.34998	7.2999	7.30198	7	8	8	6	6	5	8	8	7	34.699
	TGVEG_283710;TGME49_283710;TGGT1_283710	longevity-assurance protein (LAG1) domain-containing protein	HMM: MKLDPFFTFLLGIVVTWSV, NN: MKLDPFFTFLLGIVVTWSV	5	23.0823	23.1584	23.2225	23.3556	23.2544	23.063	23.6296	23.3918	23.215	0.951558	-0.257711									7.601	40	19.6	7.90416	7.06043	7.04025	6.96509	7.00104	6.75433	6.92162	6.86796	6.91907	6.9433	5	5	5	4	4	4	5	5	5	39.556
	TGVEG_283730;TGME49_283730;TGGT1_283730	endomembrane protein 70 subfamily protein	N/A	10	20.4011	20.8583	20.7148	20.7489	20.965	20.5184	21.1405	21.0479	20.8566	1.05622	-0.356897									11.177	19	8.3	7.16584	6.11978	6.40838	6.24443	6.18701	6.15158	6.21632	6.12094	6.17254	6.20553	2	3	3	2	2	2	2	2	2	76.341
	TGVEG_283780;TGME49_283780;TGGT1_283780	glucose-6-phosphate isomerase GPI	HMM: MGARAFRGGRRPSMREVSCATVHCARAVCLAATRCRFSRTRGRCRVPLKLAVCALFFFSEVLLT, NN: MGARAFRGGRRPSMREVSCATVHCARAV;HMM: MGARAFRGGRRPSMREVSCATVHCARAVCLAATRCRFSRTRGRCRVPLKLAVCALFFLSEVLLT, NN: MGARAFRGGRRPSMREVSCATVHCARAV	1	20.7353	20.3922	NaN	NaN	20.3202	20.4077	NaN	NaN	20.2915	0	0.272183	+								5.4115	13	6.5	6.97053	6.22045	6.17542	5.65397	5.6672	6.02197	6.197	5.51696	6.07711	6.04941	2	2	2	1	2	2	1	3	2	74.274
	TGVEG_283850;TGME49_283850;TGGT1_283850	peptidyl-prolyl cis-trans isomerase	N/A	0	22.4127	22.6443	22.772	22.1031	NaN	NaN	NaN	NaN	NaN	0	NaN	+								5.8729	16	8.3	7.47525	6.8231	6.91253	6.75454	6.40352	6.04603	6.17705	6.15354	6.19997	6.07998	4	4	3	2	1	1	1	1	1	55.575
	TGGT1_284170;TGME49_284170;TGVEG_284170	DHHC zinc finger domain-containing protein	N/A	3;5	NaN	NaN	NaN	NaN	NaN	NaN	NaN	NaN	18.5226	0	NaN									3.1062	2	2.6	5.80812	NaN	NaN	NaN	NaN	NaN	NaN	5.49403	NaN	5.51976	0	1	0	0	0	0	1	0	1	104.26
	TGGT1_284190;TGVEG_284190;TGME49_284190	pyruvate carboxylase	N/A	0	29.6698	29.7404	29.8319	29.6998	29.8813	29.7169	30.1708	29.8553	30.0683	1.27978	-0.284084									318.7	484	51.5	9.9001	8.90998	8.97195	8.89484	8.91861	8.90512	9.04844	8.89124	8.88903	9.04383	41	41	37	44	44	45	42	41	47	152.08
	TGVEG_284540;TGME49_284540;TGGT1_284540	ATP synthase F1, delta subunit protein	N/A	0	NaN	NaN	NaN	NaN	NaN	20.0768	NaN	NaN	NaN	0	NaN									2.3066	7	9.1	6.7838	5.97554	5.66274	5.98796	5.85433	NaN	6.09114	5.72741	5.73547	5.82889	1	1	1	1	0	2	1	2	1	27.635
	TGVEG_284560;TGME49_284560;TGGT1_284560	ribosomal protein RPL9	N/A	0	25.4829	25.0492	25.2368	25.3593	25.2146	24.764	25.1119	25.6232	25.136	0.0564151	-0.0340691									13.974	33	35.3	8.49479	7.69037	7.60012	7.52697	7.49422	7.38102	7.49952	7.40839	7.6097	7.56598	3	4	3	3	3	3	4	3	4	21.424
	TGVEG_284780;TGGT1_284780;TGME49_284780	fusaric acid resistance-like protein;hypothetical protein	N/A	11	NaN	NaN	NaN	NaN	NaN	NaN	19.9347	NaN	NaN	0	NaN									3.381	4	1.6	5.79466	NaN	NaN	NaN	NaN	NaN	NaN	5.79466	NaN	NaN	1	0	0	0	1	0	1	0	1	174.77
	TGGT1_285180;TGVEG_285180;TGME49_285180	hypothetical protein;S1/P1 nuclease	HMM: MVCLRHWWLWLSVVTFGAGSVNRVKAW, NN: MVCLRHWWLWLSVVTFGAGSVNRVKAW	1	21.3136	21.951	21.5504	21.305	21.5201	21.1618	21.955	21.8785	21.7034	0.528637	-0.240601									8.4274	26	8.9	7.39643	6.50243	6.5547	6.44778	6.30627	6.28028	6.25845	6.42141	6.57579	6.50435	3	2	3	2	2	2	3	4	3	69.783
	TGVEG_285680;TGGT1_285680;TGME49_285680	dihydrolipoamide acyltransferase, putative;putative dihydrolipoamide acyltransferase	N/A	0	NaN	NaN	NaN	NaN	NaN	NaN	23.2751	23.2327	23.153	0	NaN									15.013	12	11.4	7.60121	6.51652	6.45255	6.29396	6.4537	6.21072	6.72856	6.79544	6.86978	6.92232	1	1	1	1	1	1	2	2	2	38.875
	TGGT1_285870;TGVEG_285870;TGME49_285870	SAG-related sequence SRS20A	HMM: MVSCKRLAASRRQCLFFNACLFCLFICTVQIRAIAGA, NN: MVSCKRLAASRRQCLFFNACLFCLFICTVQIRAIAGA	1	22.7134	22.5831	22.1917	22.4132	22.7296	22.5622	22.9485	22.5186	23.1031	0.700184	-0.360668									14.432	20	33.5	7.70892	6.76467	6.79819	6.27674	6.57848	6.71799	6.86469	6.89061	6.76959	6.85589	3	3	2	2	4	4	5	4	3	34.955
	TGVEG_286080;TGME49_286080;TGGT1_286080	elongation factor 2 family protein	N/A	0	NaN	NaN	NaN	NaN	NaN	NaN	NaN	20.2625	NaN	0	NaN									1.4712	0	2.6	5.97904	NaN	NaN	NaN	NaN	NaN	NaN	NaN	5.97904	NaN	0	0	0	0	0	0	0	1	0	87.329
	TGVEG_286120;TGME49_286120;TGGT1_286120	prolyl endopeptidase	HMM: MLTSWLSVRCCSLIHIGGGR, NN: MLTSWLSVRCCSLIHIGGGR;HMM: MLTTWLSVRCCSLIHIGEGR, NN: MLTTWLSVRCCSLIHIGEGR	0	24.1658	23.9883	24.0291	24.0786	23.7216	23.8295	24.4997	24.2498	24.1306	0.892972	-0.232276									22.434	71	17.8	8.14891	7.26304	7.25161	7.08023	7.22123	6.89059	7.27061	7.20989	7.19246	7.25152	9	9	8	9	7	10	9	9	11	93.097
	TGVEG_286450;TGME49_286450;TGGT1_286450	dense granule protein GRA5	HMM: MASVKRVVVAVMIVNVLALIFVGVAGS, NN: MASVKRVVVAVMIVNVLALIFVGVAGS	2	22.3804	23.5774	22.1234	22.5231	NaN	NaN	22.1813	22.6582	22.3749	0.243265	0.288932									10.954	19	31.7	7.63981	6.59681	6.92705	6.51992	6.70046	6.26238	6.57111	6.79049	6.92757	6.43247	2	3	2	2	1	1	3	3	2	12.919
	TGVEG_286530;TGME49_286530;TGGT1_286530	hypothetical protein;putative transmembrane protein	HMM: MMAMSSGASALRLGCRAAPAFFCLSHRRLMFAAAPLQSF, NN: MMAMSSGASALRLGCRAA	1	NaN	NaN	20.9894	NaN	NaN	NaN	NaN	NaN	NaN	0	NaN									2.1867	6	6.9	7.07471	6.09541	6.25935	6.23992	6.12969	5.96054	6.01569	6.07423	6.14777	6.07463	1	1	1	1	1	1	1	1	1	25.436
	TGVEG_286580;TGME49_286580;TGGT1_286580	hypothetical protein;putative lysophospholipase	N/A	0	27.1775	27.1823	27.523	27.0281	27.234	26.9917	27.3739	27.2136	27.2247	0.0652424	0.0235106									116.61	206	35.7	9.1035	8.21532	8.23842	8.31188	8.07218	8.0515	8.18792	8.00655	8.04544	8.11177	24	24	25	21	19	21	21	22	22	107.19
	TGVEG_286750;TGME49_286750;TGGT1_286750	MA3 domain-containing protein	N/A	0	NaN	NaN	19.151	NaN	NaN	NaN	NaN	NaN	NaN	0	NaN									3.2722	6	4.1	6.62957	5.76509	5.72596	5.68649	5.80912	5.54202	5.68784	5.5264	5.49687	5.72546	1	1	1	1	1	1	1	1	1	58.969
	TGVEG_286920;TGME49_286920;TGGT1_286920	SWIRM domain-containing protein	N/A	0	NaN	NaN	18.3173	NaN	NaN	NaN	NaN	NaN	NaN	0	NaN									3.6291	6	2.6	6.48763	5.82362	5.76353	5.43554	5.54564	5.64856	NaN	5.40453	5.45659	5.33864	1	1	1	1	1	0	1	1	1	83.856
	TGVEG_287500;TGGT1_287500;TGME49_287500	putative T complex chaperonin;T complex chaperonin, putative	N/A	0	23.8925	23.851	23.8093	23.9888	23.8022	23.5718	24.2424	23.8681	23.7606	0.289877	-0.106108									34.803	54	39.9	8.08504	7.14251	7.27114	7.1438	7.16191	7.13931	7.15109	7.04025	7.0308	7.04056	9	11	11	9	10	9	8	8	8	59.362
	TGVEG_288360;TGGT1_288360;TGME49_288360;TGME49_324800	tryptophanyl-tRNA synthetase;tryptophanyl-tRNA synthetase (TrpRS2)	HMM: MFFLSTSVIPGAAVFSVRFAR, NN: MFFLSTSVIPGAAVFSVRFAR;N/A	0	25.9153	25.7389	25.7917	26.0384	26.0318	25.7186	26.028	26.1425	25.9549	1.39701	-0.226513									74.859	136	44.1	8.71614	7.78888	7.7691	7.65552	7.88161	7.68584	7.81819	7.64449	7.73157	7.82092	17	17	17	19	16	15	18	16	18	77.003
	TGVEG_288380;TGME49_288380;TGGT1_288380	heat shock protein HSP90	N/A	0	27.7075	27.6644	27.7424	27.7914	27.6395	27.457	27.9673	27.813	27.6581	0.514373	-0.10797									94.094	241	55.6	9.26661	8.48166	8.44599	8.26233	8.39468	8.24115	8.30585	8.1179	8.20817	8.21727	25	27	24	28	23	28	18	24	23	81.932
	TGVEG_288460;TGME49_288460;TGGT1_288460	hypothetical protein	N/A	0	18.1233	18.6114	NaN	18.3225	NaN	18.0396	17.9756	18.3502	18.3601	0.214544	0.1387									4.675	10	1.5	6.35098	5.46297	5.65916	5.05404	5.46514	4.98386	5.47871	5.20303	5.40138	5.45194	2	2	1	2	1	2	2	2	2	198.28
	TGME49_288500;TGGT1_288500;TGVEG_288500	FAD Malate-dehydrogenase (MDH-FAD)	HMM: MAAALRFLNTALTTSRPLFASGS, NN: MAAALRFLNTALTTSRPLFAS	0	21.8852	22.1955	21.7482	22.2916	22.083	22.3379	22.4188	22.056	21.8484	0.316852	-0.164738									5.3589	18	10.4	7.55138	6.38426	6.65377	6.44693	6.61614	6.51487	6.77951	6.60635	6.57486	6.66725	2	3	3	3	3	3	4	5	4	60.38
	TGVEG_288630;TGME49_288630;TGGT1_288630	nucleosome assembly protein (NAP), putative;putative nucleosome assembly protein (NAP)	N/A	0	NaN	NaN	NaN	NaN	NaN	NaN	NaN	NaN	19.7244	0	NaN									1.4069	3	5.7	6.8933	5.91645	5.89184	6.02375	6.0136	5.71899	5.93559	5.93082	6.05277	5.88154	1	1	1	1	1	1	1	1	1	32.081
	TGVEG_288650;TGME49_288650;TGGT1_288650	dense granule protein GRA12	HMM: MRAIMASTQQFLRPVGSRPLAGISVVVVVALAIALGTAA, NN: MRAIMASTQQFLRPVGSRPLAGISVVVVVALAIALGTAA;HMM: MRAIVASTQQFLRPVGSRPLAGISIVVVVALAIALGTAA, NN: MRAIVASTQQFLRPVGSRPLAGISIVVVVALAIALGTAA	1	27.018	27.1485	26.7622	27.2759	26.2632	26.5968	26.8968	27.3848	26.6122	0.0152482	0.0116221									92.629	98	43.1	9.01444	8.21408	8.23606	7.9536	8.11451	7.73804	8.02272	7.92725	8.09068	8.04112	13	13	13	10	10	11	12	12	13	47.955
	TGVEG_288720;TGME49_288720;TGGT1_288720	ribosomal protein RPL10	N/A	0	23.3896	23.1343	22.8261	22.8559	23.1181	23.8819	21.9657	22.8158	23.3177	0.415652	0.416933	+								16.051	24	33	7.88414	7.10175	6.96949	6.841	6.62694	6.72503	7.04285	6.74105	6.9304	7.11661	2	2	2	2	3	3	3	3	4	24.801
	TGVEG_288860;TGME49_288860;TGGT1_288860	RuvB family 2 protein	N/A	0	NaN	19.0476	NaN	NaN	NaN	NaN	NaN	NaN	NaN	0	NaN									3.719	7	4.3	6.27404	5.92824	5.76528	NaN	NaN	NaN	NaN	NaN	5.6526	NaN	1	1	0	1	0	1	1	1	0	55.446
	TGGT1_289300;TGVEG_289300;TGME49_289300	methionyl-tRNA synthetase	N/A	0	22.5364	22.4619	22.6881	22.748	22.6734	22.4116	22.6685	22.5868	22.4929	0.0876454	-0.0206483									15.224	35	14.9	7.70157	6.77874	6.80646	6.52311	7.00928	6.54662	6.80751	6.67924	6.66387	6.69959	5	6	5	7	4	6	5	6	5	106.03
	TGVEG_289310;TGME49_289310;TGGT1_289310	cullin family protein	HMM: MTATRACYLPSSSSSSSSSSSSSSSSSSSSSFASAE, NN: MTATRAC	0	NaN	NaN	NaN	NaN	NaN	NaN	NaN	NaN	17.6386	0	NaN									2.3064	2	2.4	5.91578	NaN	NaN	NaN	5.13726	5.17278	5.13644	4.92161	5.13982	5.25363	0	0	0	1	1	1	1	1	1	103.67
	TGGT1_289380;TGVEG_289380;TGME49_289380	hypothetical protein	HMM: MESNRRRAPCPPASGVSPGSILCLFLLSLLPCALGA, NN: MESNRRRAPCPPASGVSPGSILCLFLLSLLPCALGA	0	21.0055	21.4149	20.6021	21.3402	21.2034	21.1971	20.8135	21.1843	21.4764	0.190113	-0.15052									9.6794	21	9.6	7.25532	6.04277	6.16265	5.83616	6.4482	6.3274	6.36599	6.16864	6.60053	6.31037	2	2	3	3	3	4	4	5	3	100.23
	TGVEG_289530;TGME49_289530;TGGT1_289530;REV__Q15059;REV__P25440;REV__O60885	ribosomal protein RPL19	N/A	0	25.9729	25.9156	26.3319	26.0477	26.1815	25.7285	26.4074	26.0839	25.894	0.0992042	-0.0549266									9.7956	51	19.3	8.76147	7.84736	7.86204	7.87076	7.83671	7.78332	7.71049	7.78638	7.77667	7.76574	3	3	3	3	3	3	3	3	3	22.16
	TGVEG_289540;TGGT1_289540;TGME49_289540	hypothetical protein	HMM: MSHKTMAKSGGRSTGAVRSHDAGSPSAPVASKSRPWRLGCMVVSLAAFAVAIST, NN: MSHKTMAKSGGRSTGAVRSHDAGSPSAPVASKSRPWRLGCMVVSLAAFAVAI	0	21.9952	21.9139	21.7686	22.1553	22.324	22.1702	22.2036	22.2644	22.2248	2.10408	-0.338357									16.524	26	19.9	7.55507	6.30294	6.82981	6.17006	6.44615	6.33726	6.58014	6.42127	6.86936	6.83512	3	4	3	3	3	4	4	7	6	100.59
	TGVEG_289600;TGME49_289600;TGGT1_289600	heat shock protein HSP29	N/A	0	NaN	18.6828	NaN	NaN	NaN	NaN	NaN	NaN	NaN	0	NaN									2.0348	5	4.4	6.40454	5.63482	5.6555	NaN	5.27439	NaN	5.81068	4.90835	5.29234	5.73466	1	1	0	1	0	1	1	1	1	29.649
	TGVEG_289650;TGME49_289650;TGGT1_289650	PEP-carboxykinase I	N/A	0	23.8004	23.8804	23.8997	23.8932	23.7701	23.785	24.1642	24.0388	23.8966	0.976563	-0.173045									21.807	54	22.6	8.09618	7.09851	7.17067	6.98709	7.21389	7.09499	7.29499	7.04423	7.12218	7.17225	7	7	6	9	9	9	7	8	7	75.342
	TGVEG_289830;TGME49_289830;TGGT1_289830	eukaryotic initiation factor-3, delta subunit, putative;putative eukaryotic initiation factor-3, delta subunit	N/A	0	22.0767	22.1022	22.2023	22.1778	21.8619	21.4324	NaN	NaN	NaN	0	NaN									5.4344	15	14	7.40717	6.71315	6.59597	6.54644	6.66062	6.50854	6.51747	5.79215	5.82752	5.71655	3	3	3	3	3	3	1	1	1	37.766
	TGME49_290005;TGGT1_290005;TGVEG_290005	proteasome subunit beta type 1, putative;putative proteasome subunit beta type 1	HMM: MHALRTQAHTWKKTRRTRLSRQRKRSNFVTLCFFVLLEIRPSELI, NN: MHALRTQAHTWKKTRRTRLSRQRKRSNFVTLCFFVLLEIRPSELI;HMM: MHAPRTQAHTWKKTRRTRLSRQRKRSNFVTLCFFVLLEIRPSELI, NN: MHAPRTQAHTWKKTRRTRLSRQRKRSNFVTLCFFVLLEIRPSELI	1	NaN	NaN	19.1198	NaN	NaN	NaN	NaN	NaN	NaN	0	NaN									3.0303	11	4.5	6.81598	5.9456	5.95418	5.67711	5.90065	6.01144	5.90912	5.573	5.81045	5.80247	1	1	1	1	1	1	1	1	1	39.915
	TGVEG_290040;TGME49_290040;TGGT1_290040	macrophage migration inhibitory factor, putative;putative macrophage migration inhibitory factor	HMM: MPKCMIFCPVAATPAQQD, NN: MPKCMIFCPVAAT	0	23.1924	23.3964	23.722	23.5437	22.8789	23.2206	24.1792	23.8109	23.4879	0.703391	-0.389048									8.1372	21	47.4	7.96449	6.93906	7.01653	7.00398	6.94797	6.71134	6.92171	7.15728	7.13624	7.09906	3	3	3	2	2	2	3	4	3	12.254
	TGVEG_290160;TGME49_290160;TGGT1_290160	putative sortilin;sortilin, putative	HMM: MYTSRTPHGGLRRWPLSRSSVSAVASRVLSRSVAFHRRLASFLLSRKKTPLCALSSRPSGLQAS, NN: MYTSRTPHGGLRRWPLSRSSVSAVASRVLSRSVAF	1	NaN	20.5098	20.1087	NaN	NaN	NaN	NaN	NaN	NaN	0	NaN									2.5433	4	2.3	6.4957	5.77329	6.1922	5.99167	NaN	NaN	NaN	NaN	NaN	NaN	1	2	2	0	0	1	0	0	0	113.58
	TGVEG_290225;TGME49_290225;TGGT1_290225	hypothetical protein;putative WDSUB1 family SAM domain protein	N/A	0	NaN	NaN	NaN	NaN	NaN	17.693	NaN	NaN	NaN	0	NaN	+								1.8882	0	1.1	5.71422	NaN	NaN	NaN	5.44949	NaN	5.37357	NaN	NaN	NaN	0	0	0	1	0	1	0	0	0	207.12
	TGVEG_290290;TGME49_290290;TGGT1_290290	ubiquitin-activating enzyme E1 family protein	N/A	0	23.5034	23.4112	23.4684	23.5538	23.5523	23.3637	23.4695	23.615	23.4669	0.430054	-0.05616									42.704	48	20.1	7.96838	7.09304	7.09444	7.08629	7.02391	6.77216	6.98657	6.87699	7.10643	6.97649	10	10	7	8	6	7	10	10	9	119.84
	TGVEG_290600;TGME49_290600;TGGT1_290600	succinyl-CoA-synthetase alpha SCSA	N/A	0	NaN	21.8402	NaN	21.8261	NaN	NaN	21.8144	21.9894	21.274	0	0.147597									5.4173	13	10.2	7.28872	5.94804	6.54195	5.86652	6.49595	5.89853	6.33349	6.41137	6.53685	6.34916	1	2	1	2	2	1	3	3	3	35.09
	TGVEG_290660;TGME49_290660;TGGT1_290660	RNA recognition motif-containing protein	N/A	0	NaN	22.1002	21.319	22.1806	NaN	NaN	NaN	NaN	NaN	0	NaN									6.0787	13	7.4	7.39811	6.39099	6.6545	6.43546	6.60966	6.36235	6.33664	6.34897	6.36948	6.34062	1	2	2	2	1	1	1	1	1	48.352
	TGVEG_290670;TGGT1_290670;TGME49_290670	leucyl aminopeptidase LAP	HMM: MVPPSPGASCLLSRTRQRNVLPLACSLCLYTVTVCSAL, NN: MVPPSPGASCLLSRTRQRNVLPLACSLCLYTVTVCSAL;HMM: MVPPTPGASCLLSRTRQRNVLPLACSLCLYTVTVCSAL, NN: MVPPTPGASCLLSRTRQRNVLPLACSLCLYTVTVCSAL	0	25.7369	25.8653	25.8722	25.8644	25.908	25.5178	26.0835	25.9718	25.7097	0.335448	-0.0968749									82.721	146	39.8	8.68268	7.75772	7.83591	7.8501	7.79539	7.64226	7.71546	7.5575	7.69128	7.61838	18	20	19	20	19	18	18	20	17	83.189
	TGVEG_290870;TGME49_290870;TGGT1_290870	patched family protein	N/A	12	NaN	NaN	17.8634	NaN	NaN	NaN	NaN	NaN	NaN	0	NaN									2.8557	9	1.2	6.41246	5.52341	5.55183	5.2989	5.40056	5.42698	5.5817	5.32897	5.41357	5.50914	1	1	1	1	1	1	1	1	1	130.51
	TGVEG_290940;TGME49_290940;TGGT1_290940	EMP/nonaspanin domain family protein	HMM: MEACPAVRAGAFARLICWISLLSSTFLFFLRSVHAY, NN: MEACPAVRAGAFARLICWISLLSSTFLFFLRSVHAY;HMM: MEACPAVRAGAFARLVCWISLLSSTFLFFLRSVHAY, NN: MEACPAVRAGAFARLVCWISLLSSTFLFFLRSVHAY	10	22.6601	22.7401	22.4829	22.5688	22.7167	22.7259	22.683	22.7982	22.7161	0.556805	-0.104733									18.054	26	18.3	7.72729	6.84707	6.99166	6.79316	6.65471	6.70664	6.75885	6.65694	6.76657	6.66197	4	5	5	4	4	4	5	4	4	73.598
	TGVEG_290950;TGME49_290950;TGGT1_290950	clathrin heavy chain, putative;putative clathrin heavy chain	N/A	0	23.9097	23.9161	23.9455	23.9965	24.0567	23.9482	24.0843	24.1139	24.0676	3.15486	-0.164855									96.489	94	18.7	8.14104	7.27832	7.26595	7.03113	7.22914	6.90603	7.33744	6.88765	7.15491	7.33116	14	13	9	12	9	12	11	15	18	194.47
	TGVEG_290980;TGME49_290980;TGGT1_290980	glycine C-acetyltransferase, putative;putative glycine C-acetyltransferase	N/A	0	NaN	19.4735	NaN	NaN	NaN	NaN	NaN	NaN	NaN	0	NaN									2.676	8	2.5	6.24573	5.99049	5.8935	NaN	NaN	NaN	NaN	NaN	NaN	NaN	1	1	1	1	1	1	1	0	0	63.65
	TGVEG_291140;TGGT1_291140;TGME49_291140	CCR4-Not complex component, Not1 protein	N/A	0	NaN	NaN	NaN	NaN	NaN	19.2492	NaN	NaN	NaN	0	NaN	+								6.5418	7	3.4	6.25467	NaN	NaN	NaN	5.60331	NaN	5.84202	5.4754	5.60476	NaN	1	0	0	2	1	1	3	1	0	265.91
	TGVEG_291680;TGME49_291680;TGGT1_291680	Sec23/Sec24 trunk domain-containing protein	N/A	0	21.0216	NaN	NaN	NaN	NaN	NaN	NaN	NaN	NaN	0	NaN									5.3017	8	4.7	7.02086	6.32813	6.01733	6.19554	6.43353	5.86671	NaN	5.83884	5.98314	5.81465	2	1	1	2	1	0	1	1	1	87.609
	TGVEG_291800;TGME49_291800;TGGT1_291800	ADP-ribosylation factor family protein	N/A	0	25.7585	25.9896	25.5247	26.0609	25.6949	26.0155	26.0809	25.6453	25.7261	0.114574	-0.0597922	+	+		+		+	+	+	51.848	46	32.7	8.68959	7.70676	8.01174	7.57944	7.73458	7.57995	7.88917	7.65337	7.55882	7.6694	5	5	5	4	4	5	6	5	5	22.39
	TGGT1_291890;TGVEG_291890;TGME49_291890	microneme protein MIC1	HMM: MGQALFLTVLLPVLFGVGPEAYGE, NN: MGQALFLTVLLPVLFGV	0	20.5359	20.8099	21.182	NaN	NaN	NaN	NaN	NaN	NaN	0	NaN	+								6.8421	13	11.4	6.9844	6.31105	6.34017	6.28508	5.9206	NaN	5.87955	5.74195	5.85632	5.79436	2	2	2	1	0	1	3	1	1	48.672
	TGGT1_291930;TGVEG_291930;TGME49_291930	RNA recognition motif-containing protein	N/A	0	21.7114	21.6497	NaN	21.7085	NaN	NaN	NaN	NaN	NaN	0	NaN									9.099	13	9.2	7.29721	6.69435	6.6486	6.18859	5.99212	6.15676	5.49114	5.89711	6.51306	6.32369	4	4	1	2	3	2	1	3	1	73.131
	TGGT1_291960;TGVEG_291960;TGME49_291960	rhoptry kinase family protein ROP40 (incomplete catalytic triad)	HMM: MTPSTCCFGVLFQSFRGNSASAS, NN: MTPSTCCFGVLFQSFRGNSASA	0	24.7101	24.1111	24.3018	24.8518	24.1325	24.3801	24.1392	24.888	24.0494	0.0160526	0.0154521									35.96	55	27.8	8.26368	7.41991	7.27268	7.24047	7.47072	7.24269	7.43115	6.93674	7.38842	7.14464	6	7	8	9	6	9	5	6	6	57.904
	TGME49_292080;TGVEG_292080;TGGT1_292080	leucyl-tRNA synthetase	N/A	0	23.8405	23.7576	23.8091	24.0522	23.8852	23.7052	23.9996	23.9011	23.7097	0.312911	-0.0677643									45.747	73	15.1	8.08268	7.17409	7.19251	7.10408	7.20734	7.00928	7.21453	7.00685	7.03298	7.14866	9	9	9	11	7	11	9	9	8	141.14
	TGVEG_292130;TGME49_292130;TGGT1_292130	ribosomal protein RPL13A	N/A	0	27.5488	27.515	27.6297	27.5413	27.5194	27.414	27.6607	27.6158	27.416	0.00145471	0.000368118									23.128	102	32.9	9.19868	8.24738	8.26368	8.27119	8.29737	8.1905	8.32129	8.1724	8.18713	8.22414	7	7	7	9	8	9	8	8	9	32.749
	TGME49_292220;TGVEG_292220;TGGT1_292220	PCI domain-containing protein	HMM: MAQDATAAPPAGAAGAAEKKSAASSPLLTLCIAVEQLRQGVEQQ, NN: MAQDATAAPPAGAAGAAEKKSAASSPLLTLCIAVEQLRQGVEQQ;HMM: MAQDATAAPPAGAAGAAGAAEKKSAASSPLLTLCIAVEQLRQGVEQQ, NN: MAQDATAA	0	22.9049	23.1134	22.9798	23.0021	23.1213	22.7319	23.284	23.138	22.8335	0.230339	-0.0858167									24.447	49	29.2	7.83208	6.83533	7.05369	6.85719	6.99151	6.91106	6.92339	6.71283	6.74805	6.73861	7	9	7	8	8	8	5	7	7	61.439
	TGVEG_292920;TGME49_292920;TGGT1_292920	heat shock protein 75, putative;putative heat shock protein 75	N/A	0	22.5121	22.2538	21.9364	22.1264	22.5402	22.1716	22.0224	22.2454	21.8786	0.395958	0.185275									12.935	30	16.3	7.60747	6.88713	6.93202	6.61277	6.55	6.69147	6.61826	6.22194	6.57645	6.31942	5	4	5	4	4	4	2	3	2	95.158
	TGVEG_293180;TGME49_293180;TGGT1_293180	NADP-specific glutamate dehydrogenase	N/A	0	22.8959	22.8938	22.8269	23.0213	22.6779	22.818	22.979	23.0537	22.65	0.0605456	-0.0220121									12.195	31	18.5	7.7787	6.98718	6.96127	6.85083	6.7388	6.4687	6.74554	6.88986	6.81856	6.7629	5	5	6	4	2	4	6	4	4	63.798
	TGVEG_293190;TGME49_293190;TGGT1_293190	endonuclease/exonuclease/phosphatase family protein	N/A	0	20.6647	20.7084	21.2647	21.0561	NaN	21.1336	NaN	20.7478	21.1094	0.0590776	-0.0493631									4.7492	12	6.9	7.12982	5.91381	6.23178	6.41479	6.06179	5.29391	6.15017	5.4805	6.27156	6.53483	2	3	3	2	1	2	3	3	3	76.226
	TGVEG_293300;TGME49_293300;TGGT1_293300	Yip1 domain-containing protein	N/A	5	NaN	NaN	NaN	NaN	NaN	NaN	NaN	NaN	19.1197	0	NaN									4.5422	6	4.8	6.6601	NaN	NaN	NaN	6.46285	NaN	NaN	5.78601	5.7461	5.69951	1	0	1	1	0	0	1	1	1	62.943
	TGVEG_293340;TGME49_293340;TGGT1_293340	putative ran binding family protein 1;ran binding family protein 1, putative	N/A	0	NaN	NaN	NaN	NaN	NaN	NaN	NaN	NaN	19.4994	0	NaN									2.7631	5	5.2	6.69539	NaN	NaN	NaN	6.03379	5.7616	5.90541	5.77461	6.09684	5.81379	0	0	0	1	1	1	1	1	1	24.292
	TGVEG_293430;TGME49_293430;TGGT1_293430	hypothetical protein;putative transmembrane protein	N/A	4	24.9024	25.1516	25.0946	25.1393	25.3571	25.1377	25.5969	25.4668	25.3289	1.7331	-0.414696									37.612	84	40.6	8.4971	7.39658	7.50962	7.4917	7.52989	7.57904	7.67695	7.41071	7.5636	7.64486	8	8	9	9	11	11	8	10	12	44.583
	TGVEG_293440;TGME49_293440;TGGT1_293440	hypothetical protein;putative transmembrane protein	N/A	4	25.7306	25.9676	25.8372	25.8452	26.1865	25.8214	26.4326	26.3247	26.2335	2.25078	-0.48514									161.62	171	50.6	8.77621	7.77869	7.91984	7.69133	7.7682	7.79173	7.89975	7.73284	7.84142	7.9116	15	17	13	15	14	15	14	16	17	58.737
	TGVEG_293570;TGGT1_293570;TGME49_293570	putative translocation protein sec62;translocation protein sec62, putative	N/A	2	23.5976	23.6798	23.681	23.8499	23.1549	23.9404	24.0603	23.9703	24.0872	3.00149	-0.386415									50.177	61	40	8.07907	7.12908	7.13338	7.13389	7.07173	6.90255	7.3562	6.98381	7.07562	7.18387	8	6	7	7	4	7	5	6	7	44.899
	TGVEG_293690;TGME49_293690;TGGT1_293690	profilin PRF	N/A	0	23.5434	23.3689	23.5727	23.6559	23.0271	23.0699	23.4165	23.3204	23.0271	0.836657	0.240323									33.14	26	38.2	7.96663	7.17211	7.22285	7.20008	7.18127	6.82067	7.07969	6.55551	6.61725	6.56054	4	4	4	4	3	4	2	2	2	17.741
	TGVEG_293730;TGME49_293730;TGGT1_293730	DHHC zinc finger domain-containing protein	HMM: MSSVVAQPLLQGSSAN, NN: MSSVVAQPLLQGSSANSSDAA	2	22.8395	23.8805	23.4093	22.7519	23.2165	24.3513	23.575	24.4536	24.8846	0.884177	-0.927989									48.756	53	21.3	8.0782	6.42974	6.88214	6.62648	6.40765	6.47374	7.37502	6.98622	7.48625	7.55157	4	6	4	3	5	8	7	13	10	107.09
	TGVEG_293870;TGME49_293870;TGGT1_293870	putative thioredoxin;thioredoxin, putative	N/A	0	21.8395	NaN	NaN	NaN	NaN	NaN	NaN	NaN	NaN	0	NaN									1.4188	6	11.3	6.57434	6.57434	NaN	NaN	NaN	NaN	NaN	NaN	NaN	NaN	1	1	1	1	0	1	0	1	0	12.036
	TGVEG_294200;TGME49_294200;TGGT1_294200	glucose-6-phosphate 1-dehydrogenase	HMM: MAPENGRSSYSAYIRLLWLLTAVTAASAL, NN: MAPENGRSSYSAYIRLLWLLTAVTAASAL	1	24.4544	24.6577	24.5479	24.6721	24.3247	24.5266	24.6548	24.8585	24.4562	0.32566	-0.103138									36.684	80	30.7	8.31144	7.41926	7.52946	7.35394	7.37354	7.21405	7.31364	7.18949	7.37541	7.34949	12	13	12	9	10	9	9	11	11	62.736
	TGVEG_294220;TGME49_294220;TGGT1_294220	hypothetical protein;putative transmembrane protein	N/A	1	NaN	NaN	NaN	NaN	NaN	NaN	20.5184	20.9836	20.912	0	NaN									10.402	7	13.6	7.14789	6.38735	6.34945	6.31742	6.02185	5.32261	6.2565	5.9743	6.19293	6.23937	2	2	1	2	1	2	2	2	2	62.2
	TGVEG_294250;TGME49_294250;TGGT1_294250	WD domain, G-beta repeat-containing protein	N/A	1	24.5029	24.3141	24.4364	24.5167	24.9694	24.2957	24.9805	24.5882	24.4598	0.710363	-0.258342									74.331	92	39.2	8.30086	7.3611	7.44911	7.28547	7.29975	7.38904	7.41862	7.19167	7.18318	7.44852	10	12	11	12	11	11	10	11	12	55.858
	TGVEG_294350;TGME49_294350;TGGT1_294350	DEAD/DEAH box helicase domain-containing protein	N/A	0	NaN	NaN	NaN	NaN	NaN	NaN	20.8868	21.1707	21.3383	0	NaN									8.314	10	5.2	8.41669	7.74966	8.10582	7.83359	6.19659	5.79779	6.19778	6.09384	6.26656	6.34471	1	1	1	5	2	3	4	3	4	273.73
	TGVEG_294550;TGME49_294550;TGGT1_294550	dynein heavy chain	N/A	0	18.4073	NaN	NaN	NaN	NaN	NaN	NaN	NaN	NaN	0	NaN									3.7353	1	0.6	5.54115	5.54115	NaN	NaN	NaN	NaN	NaN	NaN	NaN	NaN	1	0	0	0	0	0	0	0	0	558.6
	TGVEG_294610;TGME49_294610;TGGT1_294610	histone lysine methyltransferase, SET, putative;putative histone lysine methyltransferase, SET	N/A	0	NaN	NaN	16.8549	NaN	NaN	NaN	NaN	NaN	NaN	0	NaN									2.1026	4	1.1	6.24731	5.42447	5.43205	4.99531	5.36487	5.29201	5.48749	4.74695	5.10622	5.33007	1	1	1	1	1	1	1	1	1	189.75
	TGVEG_294620;TGME49_294620;TGGT1_294620	eukaryotic initiation factor-3, subunit 8, putative;putative eukaryotic initiation factor-3, subunit 8	N/A	0	24.059	23.9993	23.8766	24.0881	23.8803	23.5041	24.1818	23.9453	23.733	0.0617246	0.0249443									41.931	60	16.4	8.10599	7.28081	7.28371	7.14158	7.30627	6.88831	7.12248	7.06032	7.08289	7.02743	9	8	7	7	6	6	6	7	7	109.19
	TGVEG_294630;TGME49_294630;TGGT1_294630	hypothetical protein;PH domain protein	N/A	0	NaN	NaN	18.526	NaN	NaN	NaN	NaN	NaN	NaN	0	NaN									1.4243	2	2	6.43734	5.79757	5.73547	5.49838	NaN	NaN	NaN	5.5996	5.62635	5.63381	1	1	1	0	0	0	1	1	1	95.717
	TGVEG_294640;TGME49_294640;TGGT1_294640	ribonucleoside-diphosphate reductase large chain	N/A	0	21.3425	21.1793	21.0421	21.4153	20.7754	21.447	21.0169	21.1109	21.1599	0.404694	0.0920499									10.045	23	9.1	7.28421	6.51971	6.47079	6.26722	6.23651	5.97629	6.4907	6.15999	6.39534	6.1547	4	5	3	3	2	3	3	3	2	98.178
	TGVEG_294670;TGME49_294670;TGGT1_294670	translation initiation factor 3 subunit	N/A	0	22.2139	21.8785	21.7665	NaN	NaN	NaN	NaN	NaN	21.8908	0	0.062205									16.421	12	14.8	7.29789	6.62077	6.6245	6.48377	5.67822	6.43604	5.64154	5.62032	5.66797	6.59051	2	2	2	1	1	2	1	2	2	31.812
	TGVEG_294790;TGME49_294790;TGGT1_294790	hypothetical protein	N/A	0	23.0834	23.0606	23.1009	23.0801	23.4273	22.7408	23.5671	23.3566	23.2304	1.42639	-0.303116									10.17	31	16.8	7.88214	6.95866	6.98618	6.88406	6.8833	6.88128	6.85488	6.93255	6.93285	7.01098	4	4	4	4	3	4	5	4	4	37.699
	TGVEG_294898;TGME49_294898;TGGT1_294898	tetratricopeptide repeat-containing protein	N/A	0	NaN	NaN	NaN	NaN	NaN	NaN	20.8136	20.3379	20.3395	0	NaN									4.6539	9	4.1	6.91627	5.94991	5.99263	5.88552	5.98792	5.73617	5.91394	6.1068	5.98729	6.00719	1	1	1	1	1	1	2	2	2	88.632
	TGVEG_295040;TGME49_295040;TGGT1_295040	HEAT repeat-containing protein	N/A	0	22.6569	22.2281	22.0982	22.4396	22.6423	22.242	22.1189	22.2152	22.307	0.255644	0.114057									14.334	39	14	7.61028	6.5651	6.51783	6.29088	6.80493	6.66741	6.71163	6.71178	6.71837	6.72304	5	6	4	6	6	6	5	7	6	104.59
	TGVEG_295110;TGME49_295110;TGGT1_295110	rhoptry protein ROP7	HMM: MGHPTSFGQPSCLVWLAAAFLVLGLCLVQQGAGI, NN: MGHPTSFGQPSCLVWLAAAFLVLGLCLVQQGAGI	1	24.2708	24.3904	24.0044	24.3436	24.2595	24.0105	24.5039	24.6717	24.5934	1.38465	-0.367818	+								20.636	50	20.2	8.22812	7.3425	7.2694	6.83753	7.42584	7.30014	7.33752	7.20518	7.25508	7.28348	7	6	6	8	7	7	6	5	6	63.394
	TGVEG_295125;TGGT1_295125;TGME49_295125	rhoptry protein ROP4	HMM: MGHPTSFGQPSCLVWLAAAFLVLGLCLVQQGAGI, NN: MGHPTSFGQPSCLVWLAAAFLVLGLCLVQQGAGI;HMM: MGHPTSFGQPSCLVWLAAAFLVLGLCLVQQGAGR, NN: MGHPTSFGQPSCLVWLAAAFLVLGLCLVQQGAGR	1	NaN	NaN	NaN	23.2453	23.1284	NaN	23.6872	23.6249	NaN	0	NaN	+								3.9611	12	26.6	7.7008	6.58846	6.59689	6.46562	6.95875	6.85667	6.39548	6.92106	6.99296	6.4004	1	1	1	2	2	1	2	2	1	40.181
	TGVEG_295340;TGME49_295340;TGGT1_295340	UV excision repair protein Rad23 protein	N/A	0	NaN	NaN	NaN	NaN	NaN	NaN	19.5188	NaN	NaN	0	NaN									2.9149	2	7.9	5.97656	NaN	NaN	NaN	NaN	NaN	5.68151	5.66947	NaN	NaN	0	0	0	0	0	1	1	0	0	39.739
	TGVEG_295350;TGME49_295350;TGGT1_295350	nucleoside diphosphate kinase, putative;putative nucleoside diphosphate kinase	N/A	0	22.7219	23.2677	23.0034	23.2116	22.776	23.262	22.4175	23.3098	23.0229	0.0942884	0.0809377									30.769	21	32.9	7.85055	6.97298	7.19114	7.0177	6.84653	6.64093	6.95732	6.44903	6.81881	6.75442	4	3	3	1	1	1	1	1	1	17.639
	TGVEG_295360;TGME49_295360;TGGT1_295360	hypothetical protein	N/A	0	23.7001	23.7077	24.0464	23.7387	23.6204	23.4773	23.5315	23.2857	23.046	1.36989	0.530303									14.907	40	43.3	8.07602	7.16997	7.18367	7.2739	7.27275	7.03064	7.23335	6.89146	6.90758	6.89372	5	5	6	6	4	5	5	5	5	29.55
	TGVEG_295460;TGME49_295460;TGGT1_295460	Got1 family protein	HMM: MLDDNQKIGVAFCCLGLCLGG, NN: MLDDNQKIGVAFCCLGLCLGGVGIFLFLDRALLTLGNVAFLFGLVLLLGVRKTLAF	3	NaN	NaN	15.8267	NaN	NaN	NaN	NaN	NaN	NaN	0	NaN									1.919	4	10.7	6.2411	5.57642	5.53807	4.6858	5.31886	5.12535	5.79907	NaN	NaN	NaN	1	1	1	1	1	1	0	0	0	15.541
	TGVEG_295710;TGGT1_295710;TGME49_295710	HECT-domain (ubiquitin-transferase) domain-containing protein	N/A	0	NaN	NaN	17.8597	NaN	NaN	NaN	NaN	NaN	NaN	0	NaN	+								1.6093	2	0.2	6.05011	5.39426	5.23659	5.29778	5.1944	5.20602	5.27019	NaN	NaN	NaN	1	1	1	1	1	1	0	0	0	841.31
	TGVEG_295760;TGME49_295760;TGGT1_295760	calcium-dependent protein kinase CDPK4A	N/A	0	22.7439	22.6937	22.6918	22.6374	22.8244	22.8305	NaN	NaN	NaN	0	NaN	+								12.86	25	19.2	7.62007	6.88911	6.87894	6.67487	6.78904	6.74262	6.93475	5.62133	5.48434	5.8071	6	6	4	6	5	6	1	1	1	60.966
	TGVEG_295770;TGME49_295770;TGGT1_295770	hypothetical protein	N/A	0	NaN	NaN	NaN	NaN	NaN	18.283	NaN	NaN	NaN	0	NaN									2.4904	4	1.5	6.85891	6.38389	6.38598	6.19151	5.22417	5.47138	5.55118	NaN	NaN	NaN	1	2	1	1	1	1	0	1	0	266.68
	TGVEG_295850;TGME49_295850;TGGT1_295850	cyclic nucleotide-binding domain-containing protein	N/A	0	NaN	NaN	22.3813	NaN	NaN	NaN	NaN	NaN	NaN	0	NaN									1.7364	2	0.5	7.30737	7.01828	6.72469	6.65891	NaN	NaN	NaN	NaN	NaN	NaN	1	1	1	0	0	0	0	0	0	331.49
	TGVEG_297060;TGME49_297060;TGGT1_297060	phosphoglycerate mutase PGMII	N/A	0	24.1397	24.1345	23.9506	24.3783	24.1751	23.8197	24.162	24.2617	24.1017	0.573909	-0.100211	+								10.47	37	28	8.16563	7.29101	7.25297	7.01055	7.34649	7.09223	7.27337	7.05227	7.25001	7.21312	5	5	4	6	5	7	4	5	4	38.159
	TGVEG_297070;TGME49_297070;TGGT1_297070	hypothetical protein;putative duplicated carbonic anhydrase	HMM: MTDCPFAAIRGSSGRISRSHVAFLVILAVAVTSNPTLAF, NN: MTDCPFAAIRGSSGRISRSHVAFLVILAVAVTSNPTLAF;HMM: MTDCPFAAIRGSSGRISRSHVAFLVILAVSVTSNPTLAF, NN: MTDCPFAAIRGSSGRISRSHVAFLVILAVSVTSNPTLAF	0;1	23.8273	24.3838	24.4035	24.3813	24.1626	24.7528	24.8065	24.9845	24.8041	1.53699	-0.660155									41.403	51	16.8	8.3166	7.02259	7.2332	7.21275	7.16991	7.11371	7.89882	7.21545	7.35232	7.24082	5	5	4	5	6	6	5	5	5	58.102
	TGVEG_297130;TGME49_297130;TGGT1_297130	hypothetical protein	N/A	0	22.2652	22.4583	22.088	22.51	21.8137	22.6475	22.6806	22.361	22.7356	0.951328	-0.321882									7.9998	20	20.9	7.65385	6.79051	6.89116	6.56658	6.71361	6.56372	6.83271	6.63261	6.68545	6.42298	3	3	2	2	2	2	2	3	3	22.371
	TGVEG_297430;TGME49_297430;TGGT1_297430	Fop carboxy-terminal duplication domain protein;hypothetical protein	N/A	0	NaN	20.001	19.7825	NaN	NaN	NaN	NaN	NaN	NaN	0	NaN									3.2656	3	14.1	6.41027	5.84127	6.04782	5.88178	NaN	NaN	NaN	NaN	NaN	NaN	1	2	2	0	0	0	0	0	0	25.306
	TGVEG_297470;TGME49_297470;TGGT1_297470	myosin light chain 2, putative;putative myosin light chain 2	N/A	0	NaN	21.9923	22.0211	22.0623	NaN	22.1241	21.9873	22.1285	21.9255	0.0295105	-0.00700823									37.913	23	19.1	7.48397	6.26319	6.71584	6.50146	6.66269	6.14417	6.76173	6.35908	6.49112	6.494	2	3	3	3	1	3	2	2	2	40.528
	TGVEG_297500;TGME49_297500;TGGT1_297500	T-complex protein 1 eta subunit	N/A	0	23.992	23.8975	23.8301	24.1384	24.096	23.9386	24.0918	23.9024	23.8033	0.0960267	-0.0259775									22.943	44	27.8	8.12238	7.26663	7.31194	7.15455	7.19676	7.08066	7.28321	6.99513	7.03507	7.06405	7	8	8	7	7	8	6	6	6	59.463
	TGME49_297650;TGGT1_297650;TGVEG_297650	Ser/Thr phosphatase family protein	HMM: MSVVRRHGGCRLPFLRCFLRVFLSLFLLLSVSPVAAF, NN: MSVVRRHGGCRLPFLRCFLRVFLSLFLLLSVSPVAAF	1	21.7922	22.0021	22.3028	21.8068	22.5894	22.3437	NaN	21.9039	NaN	0	0.128507									12.588	14	10.6	7.49524	6.51693	6.73189	6.75176	6.63624	6.79915	6.3022	6.23686	6.27976	5.83898	2	3	3	3	3	2	1	2	1	72.673
	TGVEG_297880;TGME49_297880;TGGT1_297880	dense granule protein DG32	HMM: MAARAGSSGVSRRFLFVLFTVLAGSSFVSAD, NN: MAARAGSSGVSRRFLFVLFTVLAGSSFVSAD	1	21.1303	21.5804	20.7194	20.9401	20.7373	20.7857	20.641	21.4104	20.9269	0.169795	0.150558									4.2637	14	10.5	7.23593	6.39952	6.51542	6.1536	6.26427	6.10452	6.29263	5.98841	6.35131	6.23431	2	2	2	2	2	2	2	2	2	24.153
	TGVEG_298630;TGME49_298630;TGGT1_298630	vacuolar transporter chaperone VTC2	N/A	2	22.4514	23.0387	23.215	22.794	23.2493	22.8877	23.2666	22.8594	23.2139	0.330145	-0.21159									37.798	36	13.1	7.83464	6.88802	7.00724	6.97585	6.83816	6.78391	7.02028	6.71754	6.67746	6.87839	6	5	6	5	3	8	3	3	4	141.63
	TGVEG_298970;TGME49_298970;TGGT1_298970	LSM3, U6 small nuclear RNA associated isoform 2 family protein	N/A	0	NaN	NaN	18.3572	NaN	NaN	NaN	NaN	NaN	NaN	0	NaN									2.2415	2	15.6	6.04552	NaN	5.6631	5.44756	NaN	NaN	NaN	5.33674	5.18404	NaN	0	1	1	0	0	0	1	1	0	10.752
	TGVEG_299050;TGME49_299050;TGGT1_299050	ribosomal protein RPL17	N/A	0	24.5005	24.4582	24.4834	24.4738	24.5184	23.9107	24.6085	24.4243	23.9481	0.319591	0.153737									9.9584	31	27.7	8.22748	7.36847	7.35093	7.25227	7.11846	7.08597	7.09649	7.39139	7.39296	7.25573	5	5	5	3	3	3	6	6	4	22.269
	TGVEG_299060;TGME49_299060;TGGT1_299060	sodium/hydrogen exchanger NHE2	N/A	13	NaN	NaN	NaN	NaN	NaN	NaN	NaN	NaN	23.1917	0	NaN									4.1764	5	4.7	7.01866	NaN	NaN	NaN	NaN	NaN	6.18633	5.24035	5.4914	6.9253	0	0	0	0	0	1	1	1	2	91.269
	TGVEG_299110;TGME49_299110;TGGT1_299110	cleft lip and palate transmembrane protein 1 (clptm1) protein	HMM: MGKLGGALLVAVAAYLSYSI, NN: MGKLGGALLVAVAAYLSYSI	5	21.4633	21.5985	21.1315	21.4986	NaN	21.3746	22.1358	21.8274	NaN	1.14797	-0.58386	+								31.43	17	8.4	7.33806	6.54271	6.54331	6.26446	6.49849	5.8635	6.09153	6.48004	6.48828	6.24155	2	2	2	3	1	3	3	2	1	71.268
	TGVEG_299200;TGME49_299200;TGGT1_299200	Bet3 transport protein, putative;putative Bet3 transport protein	N/A	0	NaN	NaN	16.9783	NaN	NaN	NaN	NaN	NaN	NaN	0	NaN									2.1537	3	10.2	6.0923	5.53811	5.47852	5.03246	NaN	NaN	NaN	4.93732	NaN	5.59804	1	1	1	0	0	0	1	0	1	21.187
	TGVEG_299210;TGME49_299210;TGGT1_299210	CTP synthase	N/A	0	22.7123	22.2784	22.3636	22.5667	22.4687	22.355	22.2263	22.9733	22.6222	0.242813	-0.155845									15.738	49	16.6	7.69384	6.92499	6.80693	6.59579	6.84182	6.65594	6.82452	6.01995	6.80112	6.70931	7	6	5	6	5	7	3	5	5	70.998
	TGVEG_299780;TGGT1_299780;TGME49_299780	hypothetical protein;putative transmembrane protein	HMM: MKPLKSLKHRAIYAVLSVILFHEAVVYGV, NN: MKPLKSLKHRAIYAVLSVILFHEAVVYGV	3	21.1824	21.0392	20.4755	21.5918	NaN	21.7858	NaN	NaN	NaN	0	NaN									5.5842	13	9.9	7.22173	6.30912	6.35633	6.07438	6.43659	5.97135	6.67493	5.92224	6.19521	5.55986	2	2	2	2	2	2	2	2	1	59.191
	TGVEG_299810;TGGT1_299810;TGME49_299810	cysteine-tRNA synthetase (CysRS)	HMM: MRSPVLPQKSSVLRFLFLGCSLFLLFFSPCPRNRVSAF, NN: MRSPVLPQKSSVLRFLFLGCSLFLLFFSPCPRNRVSAF	1	NaN	NaN	NaN	NaN	NaN	NaN	NaN	21.2135	21.2043	0	NaN									7.9561	13	9	7.37453	NaN	6.83069	NaN	6.58736	6.66255	6.43537	6.2521	6.30112	6.28778	0	2	0	2	2	1	4	2	2	101.52
	TGVEG_300000;TGME49_300000;TGGT1_300000	ribosomal protein RPL18	N/A	0	26.4128	26.412	26.6235	26.5044	26.7704	26.0894	26.8235	26.7819	26.2157	0.234456	-0.124285	+								28.683	58	40.6	8.88117	8.0083	8.02873	7.96534	7.833	7.95505	7.87037	7.84103	7.96443	7.81694	7	6	5	5	6	6	5	6	6	21.17
	TGVEG_300100;TGGT1_300100;TGME49_300100	rhoptry neck protein RON2	HMM: MTKRAGLPLGRAFLVLILLSAADSLFFSSFPRSALQLFSSVLFTDAA, NN: MTKRAGLPLGRAFLVLILLSAADSL	3	21.7668	21.555	21.6962	21.8411	NaN	NaN	21.5008	21.995	NaN	0.134942	-0.0752621									10.036	23	6.1	7.27775	6.05003	6.30747	6.63793	6.49755	6.13197	5.57431	6.57795	6.39138	5.52889	4	4	4	3	4	2	5	4	2	166.47
	TGVEG_300140;TGME49_300140;TGGT1_300140	elongation factor 1-gamma, putative;putative elongation factor 1-gamma	N/A	0	24.5075	24.432	24.256	24.537	24.7272	24.8345	24.1025	24.3244	24.4286	0.393172	0.113301									26.923	52	32.2	8.27978	7.29922	7.42298	7.26888	7.39345	7.26727	7.5306	6.93459	7.23952	7.34912	7	8	6	7	6	7	5	6	6	44.039
	TGVEG_300240;TGGT1_300240	putative syntaxin 6 protein;syntaxin 6, n-terminal protein	N/A	1	NaN	NaN	19.441	NaN	NaN	NaN	NaN	NaN	NaN	0	NaN									2.9543	12	5.1	6.71228	5.83413	5.84254	5.77379	5.7834	NaN	5.8489	5.7959	5.83896	5.74388	1	1	1	1	0	1	1	1	1	26.962
	TGVEG_300260;TGME49_300260;TGGT1_300260	threonyl-tRNA synthetase family protein	N/A	0	22.7655	22.2247	21.9963	22.002	22.3626	22.3489	NaN	21.7466	22.9268	0.00477573	-0.00787449									8.6519	28	8.2	7.65891	6.92273	6.85561	6.6404	6.8134	6.60516	6.87323	6.46665	6.40142	6.34834	4	3	4	5	3	5	1	3	2	95.885
	TGVEG_300290;TGME49_300290;TGGT1_300290	SNARE domain-containing protein	N/A	1	NaN	NaN	19.107	NaN	NaN	NaN	NaN	NaN	NaN	0	NaN									1.6673	4	4.9	6.73929	5.74126	6.00406	5.67325	5.81023	6.00074	NaN	5.65882	5.75677	5.89204	1	1	1	1	1	0	1	1	1	25.253
	TGVEG_300310;TGME49_300310;TGGT1_300310	26S proteasome regulatory subunit, S6a family AAA ATpase	N/A	0	21.9866	21.881	21.5824	21.5773	21.5956	22.0858	21.3799	NaN	21.2464	1.26341	0.503493									19.815	30	35.6	7.42267	6.7324	6.74159	6.36871	6.58395	6.37166	6.76323	5.45128	5.06915	5.91645	6	6	3	4	4	5	2	1	2	47.787
	TGVEG_301130;TGME49_301130;TGGT1_301130	hypothetical protein;putative transmembrane protein	HMM: MPCCATCCLLLSGFAIVFLLVFGA, NN: MPCCATCCLLLSGFAIVFLLVFGALMAN	2	23.6729	23.601	23.5485	23.6468	NaN	23.478	24.3799	24.216	23.9842	2.0848	-0.58585									7.285	16	33.1	8.04813	7.08796	7.118	6.99345	7.07343	6.8816	7.075	7.18036	7.19896	7.15226	2	2	2	2	1	2	2	2	2	13.507
	TGVEG_304500;TGME49_304500;TGGT1_304500	hypothetical protein;putative transmembrane protein	N/A	2	NaN	NaN	NaN	NaN	NaN	NaN	20.3641	NaN	NaN	0	NaN									1.8379	2	4.6	5.9239	NaN	NaN	NaN	NaN	NaN	NaN	5.9239	NaN	NaN	1	0	0	0	0	0	1	0	0	29.144
	TGVEG_304710;TGME49_304710;TGGT1_304710	eukaryotic peptide chain release factor, putative;putative eukaryotic peptide chain release factor	N/A	0	NaN	NaN	NaN	NaN	20.8091	NaN	NaN	NaN	NaN	0	NaN									3.3265	9	4.5	6.50361	NaN	NaN	NaN	5.11634	6.15106	NaN	NaN	6.21537	NaN	1	1	1	2	2	1	0	1	1	90.236
	TGVEG_304770;TGME49_304770;TGGT1_304770	ubiquitin-conjugating enzyme subfamily protein	N/A	0	NaN	18.1107	NaN	NaN	NaN	NaN	NaN	NaN	NaN	0	NaN									3.144	1	14.2	5.48326	NaN	5.48326	NaN	NaN	NaN	NaN	NaN	NaN	NaN	0	1	0	0	0	0	0	0	0	17.622
	TGVEG_304900;TGME49_304900;TGGT1_304900	hypothetical protein;putative transmembrane protein	N/A	5	NaN	NaN	18.1957	NaN	NaN	NaN	NaN	NaN	NaN	0	NaN									3.3373	3	10.4	6.18384	NaN	NaN	5.39893	5.44607	NaN	5.42857	5.36433	5.38523	5.40598	0	0	1	1	0	1	1	1	1	32.385
	TGVEG_304955;TGME49_304955;TGGT1_304955	serine/threonine specific protein phosphatase	N/A	3	NaN	NaN	NaN	19.0131	NaN	NaN	NaN	NaN	NaN	0	NaN									1.9242	1	0.8	5.68957	NaN	NaN	NaN	5.68957	NaN	NaN	NaN	NaN	NaN	0	0	0	1	0	0	0	0	0	303.84
	TGVEG_304990;TGME49_304990;TGGT1_304990	guanylate-binding protein, N-terminal domain-containing protein	N/A	4	NaN	NaN	NaN	NaN	NaN	NaN	NaN	NaN	17.3956	0	NaN									3.7511	4	2.3	6.03266	NaN	5.73169	NaN	NaN	5.10677	5.41427	NaN	NaN	5.1805	0	1	0	0	1	1	0	0	1	142.7
	TGVEG_305040;TGME49_305040;TGGT1_305040	HEAT repeat-containing protein	N/A	0	NaN	18.1699	NaN	NaN	NaN	NaN	NaN	NaN	NaN	0	NaN									2.9335	4	5.3	5.82385	5.20607	5.5011	NaN	NaN	NaN	5.27607	NaN	NaN	NaN	1	1	0	1	0	1	0	1	0	125.97
	TGVEG_305050;TGME49_305050;TGGT1_305050	calmodulin, putative;putative calmodulin	N/A	0	21.1857	21.5139	21.4266	NaN	NaN	NaN	21.7815	21.4589	21.2929	0.320021	-0.135668									4.3251	9	42.9	7.32681	6.61087	6.6236	6.43805	6.01607	6.37409	6.3818	6.18896	6.16062	6.14314	4	4	3	1	1	1	2	2	2	15.277
	TGVEG_305290;TGME49_305290;TGGT1_305290	putative vacuolar atp synthase subunit e;vacuolar atp synthase subunit e, putative	N/A	0	NaN	21.0761	21.1727	NaN	NaN	NaN	20.7383	20.6988	20.3824	1.38999	0.517869									4.1819	13	9.6	6.98133	5.66947	6.19529	6.18296	5.70247	5.60079	5.75686	6.11866	6.24117	6.17304	1	2	2	1	1	1	3	3	3	39.083
	TGGT1_305510;TGVEG_305510;TGME49_305510	hypothetical protein	HMM: MAVAKLDGKTLPALRLALCGEGNAVTTWWAAMLLQSAAFEVVAAW, NN: MAVAKLDGKTLPALRLALCGEGNAVTTWWAAMLLQSAAFEVVAAW	0	NaN	NaN	NaN	NaN	NaN	19.3398	NaN	NaN	NaN	0	NaN									3.161	3	9.6	6.69598	5.9812	NaN	5.85444	5.91665	5.81781	5.8693	5.81421	5.62122	NaN	1	0	1	1	1	1	1	1	0	45.203
	TGVEG_305520;TGME49_305520;TGGT1_305520	ribosomal protein RPS2	N/A	0	25.4346	25.4452	25.2921	25.4937	25.3309	25.5441	25.2454	25.4607	25.5934	0.139561	-0.0425466									32.138	91	45	8.60236	7.7249	7.74118	7.35652	7.6954	7.63393	7.77635	7.52744	7.59528	7.64263	8	8	7	9	7	8	7	7	7	29.336
	TGVEG_305810;TGME49_305810;TGGT1_305810	hypothetical protein;putative transmembrane protein	N/A	1	23.1442	23.213	23.5735	23.2237	23.3468	23.274	23.7647	23.6187	23.4578	0.8842	-0.303506									17.314	40	24.3	8.03886	6.97251	7.0167	7.11284	7.14286	7.11853	7.1371	7.07679	7.05138	7.10315	3	3	4	5	4	5	3	3	3	42.43
	TGVEG_306030;TGME49_306030;TGGT1_306030	glutathione s-transferase, n-terminal domain containing protein	N/A	0	21.3057	21.1802	21.1986	21.3126	21.0739	21.492	21.1788	21.3871	21.4629	0.541874	-0.114724									9.3567	17	18.6	7.31065	6.48374	6.10006	6.35976	6.43258	6.25166	6.5661	6.22577	6.32525	6.27473	3	2	3	3	3	4	3	3	3	37.831
	TGVEG_306060;TGME49_306060;TGGT1_306060	rhoptry neck protein RON8	HMM: MVATTLHSLPSRYLYTLLMSFLFVCGALAL, NN: MVATTLHSLPSRYLYTLLMSFLFVCGALAL	1	NaN	NaN	NaN	NaN	NaN	NaN	NaN	19.9664	NaN	0	NaN									2.4297	5	1.8	6.34795	5.15008	NaN	NaN	5.41457	5.15143	5.53227	5.59836	5.88992	5.23573	1	1	0	1	1	1	2	2	1	328.9
	TGVEG_306190;TGME49_306190;TGGT1_306190	hypothetical protein	N/A	0	NaN	NaN	20.3797	NaN	NaN	NaN	NaN	NaN	NaN	0	NaN									4.2179	6	9.6	6.89653	6.03906	5.97784	6.05637	NaN	5.90204	5.95857	5.84117	6.02719	6.09054	1	1	1	0	1	1	1	1	1	49.302
	TGGT1_306330	phospholipase	N/A	0	NaN	NaN	19.7274	NaN	NaN	NaN	NaN	NaN	NaN	0	NaN									1.4417	5	2.4	6.91914	6.07871	5.99333	5.86003	5.9407	5.94649	6.04665	6.0271	5.9045	5.81714	1	1	1	1	1	1	1	1	1	63.255
	TGVEG_306650;TGME49_306650;TGGT1_306650	hypothetical protein	HMM: MPLSLPTARLFARVALTLRGSCCS, NN: MPLSLPTARLFARVALTL;HMM: MPLSLPTARLFARVALTLRGSCCS, NN: MPLSLPTARLFARVALTLRGSCCS	0	21.1219	20.7901	20.779	NaN	NaN	NaN	21.2114	21.1166	20.9536	0.658646	-0.196882									3.4598	10	9.4	7.15875	6.35786	6.28475	6.16053	6.15112	5.99959	6.11304	6.21018	6.2388	6.22835	2	2	2	1	1	1	2	2	2	31.511
	TGVEG_306670;TGME49_306670;TGGT1_306670	hypothetical protein;NADH-ubiquinone reductase complex 1 MLRQ subunit	N/A	2	NaN	20.1471	NaN	NaN	NaN	NaN	NaN	NaN	NaN	0	NaN									1.8486	3	5	6.40978	6.12087	6.09628	NaN	NaN	NaN	NaN	NaN	NaN	NaN	1	1	1	0	0	1	0	0	0	25.833
	TGVEG_306895;TGME49_306895;TGGT1_306895	hypothetical protein;putative transmembrane protein	N/A	4	NaN	22.0618	NaN	22.2099	22.0788	21.7939	22.6324	21.9736	21.8633	0	-0.0946293									4.5027	15	24.9	7.51168	6.4217	6.62555	6.36027	6.71393	6.50978	6.6737	6.52669	6.51084	6.55606	2	2	2	3	2	3	2	3	3	18.252
	TGVEG_306960;TGME49_306960;TGGT1_306960	phenylalanine--tRNA ligase, beta subunit protein	N/A	0	22.3986	22.3223	22.0012	22.5135	22.3807	22.1331	22.3284	22.3768	21.959	0.0363716	0.0192788									17.339	39	18.1	7.61095	6.79611	6.69793	6.43859	6.85205	6.60904	6.78932	6.55547	6.54231	6.3852	7	6	5	8	7	7	6	5	4	74.584
	TGVEG_307990;TGGT1_307990;TGME49_307990	arrestin (or s-antigen), n-terminal domain-containing protein	N/A	0	23.3871	23.6384	23.7714	23.6522	23.7883	23.5925	NaN	NaN	NaN	0	NaN	+								23.976	34	29.6	7.87795	7.11173	7.07196	7.14211	7.01953	6.99246	7.19579	5.69522	5.61636	NaN	7	7	7	6	6	5	1	1	0	47.762
	TGGT1_308020;TGVEG_308020;TGME49_308020;TGME49_328700	hypothetical protein;SAG-related sequence SRS57	HMM: MQLWRRRAAGPASLGRQSLPLGCFFAAFGLCVLSAILGT, NN: MQLWRRRAAGPASLGRQSLPLGCFFAAFGLCVLSA	1	25.2156	25.4246	25.481	25.3393	25.3936	25.2756	25.901	25.7233	25.6307	1.54015	-0.377968									111.64	66	28.1	8.61209	7.54921	7.68006	7.57246	7.60508	7.49308	7.68383	7.69802	7.72576	7.81914	6	7	7	7	7	6	8	8	8	41.773
	TGVEG_308090;TGGT1_308090	rhoptry protein ROP5	HMM: MATKLARLATWLVLVGCLLWRAGAV, NN: MATKLARLATWLVLVGCLLWRAGAV	0	27.8535	27.7787	27.7817	28.0465	27.8558	27.5882	28.1619	28.2072	27.7964	0.881842	-0.250521									112.89	203	53.9	9.30578	8.35036	8.38191	8.2572	8.42562	8.28544	8.39471	8.2659	8.41599	8.34937	17	18	15	18	15	19	18	18	18	60.775
	TGGT1_308810B;TGVEG_308810B;TGME49_308810;TGGT1_308810A	rhoptry neck protein RON9	N/A	0;1	NaN	NaN	NaN	NaN	NaN	20.3891	NaN	NaN	20.6705	0	NaN									13.45	12	13.1	6.98147	6.04856	5.98162	NaN	5.92013	6.00372	6.13523	6.05805	6.19276	6.20352	1	1	0	1	2	2	1	2	4	115.12
	TGGT1_308840;TGVEG_308840;TGME49_308840	SAG-related sequence SRS51	N/A	0	26.2517	26.1283	26.117	26.0949	26.0893	26.3419	26.8216	26.6851	26.6287	2.79718	-0.546172									135.36	108	39.2	8.83967	7.87733	7.8882	7.77297	7.78633	7.67035	7.99248	7.88283	7.99362	7.99202	8	9	8	7	7	8	8	9	9	38.038
	TGGT1_308860;TGVEG_308860;TGME49_308860	hypothetical protein	N/A	0	23.854	23.9791	24.8787	23.8193	23.786	23.5836	24.3015	24.0303	23.6873	0.248051	0.230892									14.75	46	14.2	8.1428	7.10998	7.31817	7.42438	7.15339	7.11103	7.19388	7.0886	7.07166	7.07332	5	7	7	7	5	6	6	5	5	69.566
	TGVEG_308950;TGME49_308950;TGGT1_308950	histidine acid phosphatase superfamily protein	HMM: MVRVFCVAAVFGLFGATRVSGS, NN: MVRVFCVAAVFGLFGATRVSGS	0	NaN	NaN	NaN	20.4174	20.6402	NaN	21.0681	20.9396	20.223	0	NaN									6.4278	18	8.2	6.92417	NaN	5.71999	5.86775	6.10561	6.07155	5.77921	6.13415	6.18213	6.07799	1	1	2	2	2	1	2	2	3	66.302
	TGGT1_309120;TGVEG_309120;TGME49_309120	ribosomal protein RPL4	HMM: MCLSLCLCPCVSAAFSR, NN: MCLSLCLCPCVSAA;N/A	0	27.1473	27.0184	27.0825	27.2846	27.1474	26.925	27.566	27.5673	27.0191	0.74244	-0.301402									76.197	134	52.2	9.10261	8.21455	8.17998	8.03898	8.29312	8.12901	8.18227	7.96261	8.164	8.0834	15	15	14	17	15	18	12	15	14	45.748
	TGVEG_309210;TGME49_309210;TGGT1_309210	peroxiredoxin 6, putative;putative peroxiredoxin 6	N/A	0	23.25	23.713	23.6366	23.6892	23.3016	23.5164	23.4109	23.3691	23.5391	0.242503	0.0935014									13.327	25	20.1	7.98088	6.88898	7.06333	6.93603	7.19304	7.05454	7.21614	6.81929	6.95521	6.9419	4	4	4	6	5	6	5	5	5	44.035
	TGVEG_309560;TGME49_309560;TGGT1_309560	nmda receptor glutamate-binding chain	N/A	7	26.0628	26.1049	26.3971	26.1075	26.4147	26.0291	26.8244	26.3703	26.1352	0.486869	-0.255041									8.9943	32	14.7	8.82006	7.89044	7.93161	7.69306	7.86103	7.87384	7.88839	7.9108	7.85106	7.85243	3	3	2	3	3	3	3	3	3	29.321
	TGGT1_309590;TGVEG_309590;TGME49_309590	rhoptry protein ROP1	HMM: MACRQLLCSVQNLLFFFLRDIYCT, NN: MACRQLLCSVQNLLFFFLRDIYCT;HMM: MACRQLLCSVQNLLFYFLPDIYCT, NN: MACRQLLCSVQNLLFYFLPDIYCT	0	28.9261	28.9884	29.4023	29.1965	29.2803	28.8717	29.7175	29.5821	29.407	1.24744	-0.463303									141.76	109	17.5	9.71737	8.65009	8.73767	8.75981	8.81734	8.80352	8.73539	8.77856	8.82527	8.73401	7	9	8	9	10	9	9	7	7	49.541
	TGGT1_309600;TGVEG_309600;TGME49_309600	hypothetical protein	N/A	0	NaN	NaN	NaN	NaN	NaN	NaN	NaN	19.8484	20.0709	0	NaN									7.7363	7	5.6	6.62272	NaN	6.00415	5.76933	5.5154	5.48223	NaN	5.44885	5.84691	5.99216	0	1	1	1	1	1	1	2	2	106.57
	TGVEG_309730;TGME49_309730;TGGT1_309730	thioredoxin reductase	HMM: MSCLSVSAARAYAAAAASRPVSAS, NN: MSCLSVSAARAYAAAAASRPVSAS	0	23.4123	23.3537	23.4048	23.2626	23.13	23.2666	23.4912	23.6553	23.1472	0.097269	-0.0409737									37.466	48	14	7.93313	7.12516	7.12856	6.98097	6.89785	6.66079	7.0461	6.89829	6.99471	6.90201	6	7	5	5	4	6	5	5	5	70.781
	TGVEG_309752;TGME49_309752;TGGT1_309752	putative succinate-Coenzyme A ligase, beta subunit;succinate-Coenzyme A ligase, beta subunit, putative	HMM: MALSAAGVGRQVLSAAARLSCSTSSAPLRATISSVTAASATSSSLLPSLLCATHRATGA, NN: MALSAAGVGRQVLSAAAR	0	22.6483	22.3209	22.5803	22.6498	22.3899	22.2405	22.3008	22.5826	22.4433	0.225444	0.0742219									14.294	27	24.9	7.66255	6.90787	6.7191	6.80615	6.79127	6.4931	6.53451	6.49894	6.72337	6.70666	5	4	5	5	4	3	5	5	4	53.388
	TGGT1_309760;TGVEG_309760;TGME49_309760	hypothetical protein	HMM: MKVGISRYVGRFTVLIGVVTLLVSSGPQRVTST, NN: MKVGISRYVGRFTVLIGVVTLLVSSG	0	NaN	21.4742	NaN	21.5821	NaN	22.4114	21.789	NaN	22.1179	0	-0.479295									7.4571	13	15.6	7.37771	6.50892	6.50095	NaN	6.48585	NaN	6.77717	6.28382	6.3057	6.65067	2	2	0	2	0	2	2	1	3	34.526
	TGVEG_309810;TGME49_309810;TGGT1_309810	ribosomal protein RPP2	HMM: MAMKYVAAYLMVVLSGTDAP, NN: MAMKYVAAYLMVVLSGTDAP	0	21.5448	22.5592	21.1031	21.029	NaN	21.4132	NaN	NaN	NaN	0	NaN									7.693	11	39.8	7.33676	6.37863	6.75223	6.48875	6.47251	5.16179	6.31998	6.32465	6.24598	6.18001	2	2	2	2	1	2	1	1	1	11.768
	TGVEG_309820;TGME49_309820;TGGT1_309820	ribosomal protein RPL11	N/A	0	24.4114	24.35	24.7536	24.5487	24.0341	24.0386	24.2649	24.5394	24.1486	0.475723	0.187377									15.678	42	32	8.24189	7.39745	7.42113	7.41972	7.43112	7.16438	7.32754	6.99211	7.13941	7.0197	4	4	4	4	4	4	3	3	3	20.199
	TGGT1_309890;TGVEG_309890;TGME49_309890	hydrolase;hypothetical protein	N/A	0	NaN	NaN	NaN	20.1702	NaN	19.677	NaN	NaN	NaN	0	NaN	+								2.7069	6	1	6.56659	NaN	NaN	6.01111	6.03993	5.80299	5.9679	NaN	NaN	NaN	0	1	1	3	1	3	0	0	0	333.81
	TGVEG_310000;TGME49_310000;TGGT1_310000	membrane protein, putative;putative membrane protein	N/A	8	21.397	21.3542	21.9879	21.8543	21.3912	21.9359	22.3104	21.7463	21.9297	0.722004	-0.415782									85.682	33	16.6	7.46178	6.35589	6.60783	6.47821	6.69073	6.45697	6.51164	6.43985	6.04104	6.67745	3	4	3	4	4	3	3	3	4	79.316
	TGVEG_310010A;TGME49_310010;TGGT1_310010	rhoptry neck protein RON1	HMM: MARSSRAAPSGAFAHGVAKASFTWISGMKTPFGCVFFFCLIALWGFSAAL, NN: MARSSRAAPSGAFAHGVAKASFTWISGMKTPFGCVFFFCLIALWGFSAAL	1	NaN	NaN	NaN	NaN	NaN	22.8301	NaN	NaN	NaN	0	NaN									9.0222	4	13.8	7.05423	NaN	5.87787	NaN	NaN	NaN	6.91998	6.10792	5.9894	NaN	0	1	0	0	0	1	1	1	0	86.417
	TGVEG_310030;TGME49_310030;TGGT1_310030	cyclase-associated protein, putative;putative cyclase-associated protein	N/A	0	23.0011	23.6577	23.297	23.0225	22.6138	22.9733	23.2668	23.1571	NaN	0.156849	0.106609									13.127	25	42.9	7.85013	6.82191	7.06811	6.94585	6.93779	6.64646	7.11267	6.7417	6.9148	6.58646	3	3	4	4	3	5	4	4	2	22.483
	TGVEG_310080;TGME49_310080;TGGT1_310080	AMP-binding enzyme domain-containing protein	N/A	0	23.2365	23.1847	23.2084	23.386	23.1785	22.8673	23.1343	23.3101	23.0166	0.258276	0.0561816									23.044	46	22.1	7.87576	7.02268	7.06311	6.78123	6.86192	6.83741	6.9987	6.83915	6.99374	6.78487	8	8	6	7	7	8	7	8	7	87.847
	TGGT1_310150;TGVEG_310150;TGME49_310150	AMP-binding enzyme domain-containing protein	N/A	0	20.323	20.2049	NaN	NaN	NaN	NaN	NaN	NaN	NaN	0	NaN									4.2356	6	7	6.87634	6.13532	6.09384	6.01435	6.25103	NaN	5.89	5.65538	5.93984	NaN	3	2	2	2	0	1	1	1	0	95.963
	TGGT1_310190;TGVEG_310190;TGME49_310190	PIK3R4 kinase-related protein (incomplete catalytic triad)	N/A	0	22.1025	21.8524	21.9818	21.9145	22.5484	22.1201	NaN	NaN	NaN	0	NaN	+								10.677	29	5.3	7.40499	6.42749	6.53025	6.51222	6.42674	6.86344	6.74532	5.0812	5.26972	5.39315	5	5	6	6	9	8	1	1	1	317.1
	TGVEG_310210;TGME49_310210;TGGT1_310210	hypothetical protein;putative transmembrane protein	N/A	12	NaN	NaN	19.5637	NaN	NaN	NaN	NaN	NaN	NaN	0	NaN									3.4577	2	2.5	5.81074	NaN	NaN	5.81074	NaN	NaN	NaN	NaN	NaN	NaN	0	1	1	0	0	0	0	0	0	83.636
	TGVEG_310320;TGME49_310320;TGGT1_310320	calreticulin family protein	HMM: MSANRTPCMSAVPGLSSTSVSSRLSFSILALLTFVALHTLLPD, NN: MSANRTPCMSAVPGLSSTSVSSRLSFSILALLTFVALHTLLPD	2	NaN	NaN	NaN	NaN	NaN	NaN	NaN	NaN	21.6659	0	NaN									4.993	6	5.2	6.93066	6.24095	6.3522	NaN	NaN	NaN	NaN	6.20645	NaN	6.46599	1	1	1	1	1	0	1	0	2	64.185
	TGGT1_310370;TGVEG_310370;TGME49_310370	hypothetical protein;putative transmembrane protein	N/A	11;12	NaN	NaN	NaN	NaN	NaN	NaN	NaN	NaN	17.2739	0	NaN									3.1823	3	7.4	6.00505	NaN	NaN	NaN	NaN	NaN	NaN	5.94075	NaN	5.14389	0	0	0	0	1	0	1	0	1	63.695
	TGVEG_310490;TGME49_310490;TGGT1_310490	ribosomal protein RPL27A	N/A	0	23.7285	23.9256	24.1241	24.0794	23.6701	23.7274	24.1472	24.1	23.4428	0.0392382	0.0293865									4.8013	18	21.8	8.093	7.13884	7.24485	7.1823	7.2193	7.00724	7.19684	7.0582	7.12934	6.99771	2	2	2	2	2	2	2	2	2	16.344
	TGVEG_310640;TGME49_310640;TGGT1_310640	phosphorylase family protein	N/A	0	23.1729	23.2541	22.9807	23.3181	22.9822	22.6979	23.6083	23.2809	22.8077	0.145514	-0.0963879									15.408	37	23.4	7.86684	6.8984	7.07954	6.87337	7.03375	6.61644	6.92524	6.86411	6.92896	6.84718	5	5	5	5	4	5	4	5	5	33.043
	TGGT1_310670;TGVEG_310670;TGME49_310670	glycogen phosphorylase 1, putative;putative glycogen phosphorylase 1	N/A	0	21.8794	21.7076	21.7617	21.9622	22.1376	22.3115	22.1504	21.8651	22.1714	1.18304	-0.279378									11.595	28	10.3	7.54765	6.73256	6.53936	6.62171	6.47028	6.2588	6.62304	6.53713	6.59741	6.76882	6	5	4	3	2	3	5	5	5	105.46
	TGVEG_310700;TGME49_310700;TGGT1_310700	serine/threonine phosophatase PP1	N/A	0	NaN	NaN	NaN	NaN	NaN	18.6614	NaN	NaN	NaN	0	NaN									3.519	3	26.8	6.03334	NaN	NaN	NaN	NaN	NaN	5.66508	5.31292	5.61472	NaN	0	0	0	0	0	1	1	1	0	35.005
	TGVEG_310750;TGME49_310750;TGGT1_310750	emp24/gp25L/p24 family protein	HMM: MKALLVLSALLAACLQGRLASAA, NN: MKALLVLSALLAACLQGRLASAA	1	NaN	21.2234	21.1654	NaN	NaN	NaN	NaN	NaN	NaN	0	NaN									13.734	15	14	7.14048	6.158	6.41424	6.29909	6.1395	NaN	5.93545	6.14879	6.18616	6.41644	1	2	2	3	0	2	2	1	3	64.977
	TGGT1_310780;TGVEG_310780;TGME49_310780	dense granule protein GRA4	HMM: MQGTWFSLFVVVMVSHLACGG, NN: MQGTWFSLFVVVMVSHLACGG;HMM: MQGTWFSLFVVVMVSHLAFGG, NN: MQGTWFSLFVVVMVSHLAFGG	0	23.2932	23.523	23.2068	23.466	23.3832	23.2265	23.3617	23.3998	23.3198	0.0698479	-0.0194016									86.389	37	26.7	7.93653	7.02971	7.12846	6.56295	6.90095	6.45214	7.17278	6.97035	6.99769	7.13456	4	4	2	4	2	4	3	4	5	36.283
	TGVEG_310790;TGME49_310790;TGGT1_310790	hypothetical protein	HMM: MTRGFAFCLLFLALFGLFSVAPHSIEAG, NN: MTRGFAFCLLFLALFGLFSVAPHSIEAG	0	NaN	NaN	NaN	NaN	NaN	NaN	NaN	NaN	19.2088	0	NaN									2.3814	3	8.2	6.1747	NaN	NaN	NaN	NaN	5.08041	5.92549	NaN	NaN	5.72634	0	0	0	0	1	1	0	0	1	24.708
	TGVEG_311240;TGME49_311240;TGGT1_311240	DnaJ family chaperone, putative;putative DnaJ family chaperone	N/A	0	21.8233	22.353	22.1798	22.2298	NaN	21.7829	22.4622	22.3689	21.9876	0.293044	-0.154187									11.262	33	19.5	7.53926	6.88958	6.72924	6.71615	6.68666	5.70679	6.4391	6.3903	6.47494	6.43737	5	5	7	3	1	3	4	5	5	47.448
	TGVEG_311290;TGME49_311290;TGGT1_311290	protein tyrosine phosphatase family protein, ptpla protein	HMM: MAEAAPARASLAGKVPGPRPPSLAVHLYLFLYNCVATAA, NN: MAEAAPARASLAGKVPGPRPPSLAVHLYLFLYNCVATAA	3	21.8779	22.2106	22.1212	21.9199	21.9106	22.2879	22.0672	NaN	22.0987	0.033518	-0.0130507									3.605	14	9.5	7.52256	6.60505	6.70601	6.58167	6.55274	6.4977	6.76145	6.42991	6.12212	6.58854	2	2	2	2	2	2	2	1	2	30.563
	TGVEG_311310;TGME49_311310;TGGT1_311310	protein phosphatase 2B catalytic subunit, calcineurin family phosphatse superfamily protein	N/A	0	21.5596	21.3416	21.474	21.7226	21.6812	21.0614	NaN	21.05	NaN	0	0.408421									7.7793	16	19.6	7.31014	6.15296	6.12791	6.61262	6.4231	6.48636	6.43343	5.9877	6.35511	6.27816	2	3	4	2	5	3	2	3	2	56.445
	TGVEG_311360;TGME49_311360;TGGT1_311360	protein kinase G AGC kinase family member PKG	N/A	0	27.8346	27.82	28.0764	27.8293	28.0469	28.1178	28.152	27.9531	28.1789	0.775912	-0.184311	+	+		+					323.31	298	40.9	9.33236	8.39818	8.39454	8.34774	8.34547	8.3358	8.53969	8.27508	8.2978	8.40995	26	28	25	26	26	29	30	30	32	111.24
	TGVEG_311400;TGME49_311400;TGGT1_311400	WD domain, G-beta repeat-containing protein	N/A	0	21.2271	21.3503	NaN	NaN	NaN	NaN	NaN	21.7297	NaN	0	-0.441037									9.1192	11	4	7.17667	6.41402	6.4503	6.14672	5.97833	5.91717	6.00247	5.99004	6.40941	6.27326	3	3	1	1	1	1	1	2	1	165.57
	TGGT1_311430;TGVEG_311430;TGME49_311430	fibrillarin	N/A	0	NaN	NaN	19.5289	NaN	NaN	NaN	NaN	NaN	NaN	0	NaN									1.6732	1	6.9	6.66136	5.80728	5.8886	5.80027	5.93354	5.81906	6.00907	NaN	NaN	NaN	1	1	1	1	1	1	0	0	0	31.931
	TGGT1_311470;TGVEG_311470;TGME49_311470	rhoptry neck protein RON5	HMM: MAEFTWRPLLMSLPKMIAFFHILLFSGALAA, NN: MAEFTWRPLLMSLPKMIAFFHILLFSGALAA	0	22.732	22.4733	22.4813	22.8473	22.708	22.1145	22.6373	23.1216	22.3863	0.262871	-0.15283									54.524	45	12.1	7.6891	6.73714	6.51045	6.61612	6.80992	6.68883	6.52736	6.81295	6.94875	6.77463	4	5	4	6	5	4	7	9	7	186.97
	TGVEG_311480;TGME49_311480;TGGT1_311480	hypothetical protein	N/A	0	21.9361	21.6397	21.7045	NaN	NaN	NaN	22.6392	22.2605	22.3756	2.00732	-0.665016									14.505	20	28.5	7.4461	6.47276	6.9479	6.18761	5.9315	5.87465	6.32619	6.59322	6.40617	6.63974	3	4	3	1	1	1	4	3	4	42.379
	TGVEG_311680;TGME49_311680;TGGT1_311680	FUN14 family protein	N/A	0	21.1838	21.569	21.3047	21.9557	21.2389	NaN	NaN	21.7489	21.4022	0.472531	-0.223058									5.0634	8	24.5	7.33578	6.4892	6.57469	6.46189	6.43398	6.10394	5.60001	6.32879	6.43438	6.43024	3	3	3	2	2	1	2	2	2	19.986
	TGVEG_311690;TGME49_311690;TGGT1_311690	UBA/TS-N domain-containing protein	N/A	0	NaN	NaN	NaN	NaN	21.3336	NaN	NaN	NaN	NaN	0	NaN									3.2197	2	10.3	6.47952	NaN	NaN	NaN	5.57528	6.30897	5.78083	NaN	NaN	NaN	0	0	0	1	2	2	0	0	0	45.975
	TGVEG_311720;TGME49_311720;TGGT1_311720	chaperonin protein BiP	HMM: MTAAKKLSLFSLAALFCLLSVATLRPVAAS, NN: MTAAKKLSLFSLAALFCLLSVATLRPVAAS	1	26.6823	26.8677	26.9369	26.8253	26.5875	26.5161	26.8038	27.0083	26.6324	0.036112	0.0141379									58.59	149	41.6	8.98836	8.10374	8.28081	8.07485	8.04163	7.87215	8.03165	7.78507	7.94447	7.98136	19	20	20	19	19	17	17	17	18	73.252
	TGGT1_311890;TGVEG_311890;TGME49_311890	hypothetical protein	N/A	0	20.8069	20.7581	21.0182	20.7918	NaN	NaN	20.4869	NaN	NaN	0	0.374143									4.6015	10	12.9	6.98377	6.39368	6.09701	6.40936	6.07044	5.86159	NaN	5.80673	5.61909	5.58049	3	3	2	2	1	0	2	1	1	44.136
	TGVEG_312090;TGME49_312090;TGGT1_312090	ribosomal protein RPL23	N/A	0	24.9506	24.9206	24.8256	24.9554	25.0049	24.8363	24.9142	24.7294	24.619	0.702336	0.144702									51.33	31	37.4	8.3887	7.57618	7.61534	7.45495	7.35837	7.31139	7.3901	7.26021	7.36489	7.44823	5	4	4	3	3	3	3	4	4	14.818
	TGGT1_312100;TGVEG_312100;TGME49_312100	plasma membrane-type Ca(2+)-ATPase A1 PMCAA1	N/A	11	23.2408	23.1274	23.0923	23.2019	23.4499	23.0809	23.8221	23.4533	23.478	1.5595	-0.430951									29.15	35	9.3	7.95981	7.46409	7.48895	6.96864	6.53719	6.2317	6.60247	6.69852	6.56046	6.61633	8	5	5	4	2	4	5	5	5	198.98
	TGVEG_312110;TGME49_312110;TGGT1_312110	apicoplast-associated thioredoxin family protein Atrx1	HMM: MRHGPCFTCTHKFSCPSFLRNGVVSALALLFPKTAAV, NN: MRHGPCFTCTHKFSCPSFLRNGVVSALALLFPKTAAV	0	21.8729	22.1207	21.4856	21.9962	21.8267	21.9076	21.9687	22.0744	21.5791	0.0699846	-0.0477053									13.559	35	14.4	7.49525	6.58936	6.64753	6.13357	6.65622	6.13605	6.73137	6.42946	6.57603	6.5856	5	6	3	5	3	4	4	5	5	86.833
	TGGT1_312150;TGVEG_312150;TGME49_312150	hypothetical protein;putative transmembrane protein	N/A	1	23.2008	23.021	23.1124	22.7728	23.2143	22.7743	23.3663	23.1942	23.04	0.341155	-0.0887222									25.844	22	25.2	7.86315	7.07188	7.12659	6.88797	6.81898	6.8236	7.04902	6.68537	6.72624	6.73585	5	7	3	3	3	6	3	3	3	60.669
	TGVEG_312200;TGME49_312200;TGGT1_312200	serine/threonine protein phosphatase	N/A	0	NaN	NaN	18.42	NaN	NaN	NaN	NaN	NaN	NaN	0	NaN									1.869	9	2	6.45627	5.66867	5.37539	5.46644	5.50061	5.69814	5.73881	NaN	NaN	5.69834	1	1	1	1	1	1	1	1	1	61.536
	TGGT1_312270;TGVEG_312270;TGME49_312270	rhoptry protein ROP13	HMM: MKRTELCIAALVAVGAFAF, NN: MKRTELCIAALVAVGAFAFTSPNAVAK	1	21.899	21.6733	22.0739	21.9614	22.3347	21.7798	22.2932	22.1105	21.8055	0.438484	-0.187656									8.0265	19	17	7.52098	6.67668	6.65091	6.58744	6.52226	6.6146	6.57151	6.47821	6.50383	6.43498	3	3	2	2	3	2	2	2	3	44.729
	TGVEG_312480;TGME49_312480;TGGT1_312480	putative uracil phosphoribosyltransferase FUR1;uracil phosphoribosyltransferase FUR1, putative	N/A	0	21.3047	21.4449	NaN	NaN	NaN	NaN	NaN	NaN	NaN	0	NaN									2.9209	7	18.9	6.86064	6.05786	6.66513	NaN	5.60761	5.64589	5.80597	NaN	NaN	NaN	2	3	1	2	1	1	1	0	0	27.646
	TGVEG_312600;TGME49_312600;TGGT1_312600	heat shock protein HSP21	N/A	0	NaN	NaN	NaN	NaN	NaN	19.2202	NaN	NaN	NaN	0	NaN									2.0656	4	6.2	6.19665	NaN	NaN	NaN	5.66638	5.63102	5.83332	NaN	NaN	NaN	0	0	0	1	1	1	0	0	0	21.279
	TGVEG_312622;TGME49_312622;TGGT1_312622	DUF803 domain-containing protein	N/A	10	NaN	NaN	NaN	NaN	NaN	NaN	NaN	NaN	18.8537	0	NaN									5.6221	9	4.9	6.08048	NaN	NaN	NaN	5.51163	NaN	NaN	5.66505	NaN	5.61943	1	2	0	2	0	1	2	0	1	86.817
	TGVEG_312630;TGME49_312630;TGGT1_312630	anonymous antigen-1, putative;putative anonymous antigen-1	N/A	0	24.0443	23.7968	23.8946	23.9436	23.8155	23.9184	23.9991	23.978	23.795	0.0426748	-0.0121257									36.64	85	12.2	8.09321	7.27568	7.19326	7.14517	7.02469	6.95666	7.18568	7.16056	7.05983	7.16373	15	12	13	9	9	11	14	13	15	286.22
	TGVEG_312640;TGME49_312640;TGGT1_312640	hypothetical protein;PUB domain protein	N/A	0	19.4487	NaN	NaN	20.141	19.9531	NaN	NaN	NaN	NaN	0	NaN									2.5691	7	7.9	6.59944	5.87539	5.58974	5.45861	6.02792	5.8795	NaN	5.56209	5.55639	NaN	2	1	1	2	2	0	1	1	0	31.692
	TGVEG_313010;TGME49_313010;TGGT1_313010	DEAD (Asp-Glu-Ala-Asp) box polypeptide DDX6	N/A	0	22.7051	22.706	22.5146	22.5422	22.4209	22.7103	22.6971	22.7676	22.4257	0.0325001	0.0117652									13.943	39	20.8	7.71809	6.72984	6.97233	6.58022	6.94937	6.55211	6.89671	6.52561	6.77961	6.5991	5	6	6	8	6	7	6	6	5	53.434
	TGVEG_313070;TGME49_313070;TGGT1_313070	hypothetical protein;putative transmembrane protein	N/A	1	NaN	NaN	19.9729	NaN	NaN	NaN	NaN	NaN	NaN	0	NaN									10.851	5	9.9	6.82756	6.22768	6.07679	5.93392	NaN	5.99367	6.01347	NaN	NaN	5.98434	1	1	1	0	1	1	0	0	1	35.571
	TGVEG_313080;TGME49_313080;TGGT1_313080	hypothetical protein;putative transmembrane protein	HMM: MAASVPRLPPLFLSTALLLCLAA, NN: MAASVPRLPPLFLSTALLLCLAA	1	27.5494	27.7819	27.7052	27.7071	27.841	27.5264	28.1714	27.8942	27.7955	0.97822	-0.274829									167.9	167	40.2	9.28051	8.23925	8.3282	8.22157	8.37641	8.33488	8.4506	8.32797	8.21812	8.38093	12	12	14	15	15	14	13	12	14	49.527
	TGVEG_313100;TGME49_313100;TGGT1_313100	signal recognition particle SRP54 protein	N/A	0	NaN	18.9706	NaN	NaN	NaN	NaN	NaN	NaN	NaN	0	NaN									1.4305	2	2.6	6.0304	5.37827	5.74211	NaN	5.44931	NaN	NaN	NaN	NaN	NaN	1	1	0	1	0	0	0	0	0	62.79
	TGVEG_313140;TGME49_313140;TGGT1_313140	isocitrate dehydrogenase	HMM: MRAENSGFSQKSVRFWTPLESVQPRTACSFSLCLLWKVCLLS, NN: MRAENSGFSQKSVRFWTPLESVQPRTACSFSLCLLWKVCLLSC;HMM: MRAENSGFSQKSVRLWTPLESVQPRTACSFSLCLLWKVCLLS, NN: MRAENSGFSQKSVRLWTPLESVQPRTACSFSLCLLWKVCLLSC	0	22.3742	22.2584	22.0259	22.1977	22.1853	22.3893	22.445	22.0318	22.4133	0.174472	-0.0771923									11.496	26	13.4	7.60327	6.63306	6.67671	6.58927	6.68969	6.34209	6.80771	6.60099	6.57335	6.77326	4	4	4	3	3	4	3	3	4	68.295
	TGVEG_313230;TGME49_313230;TGGT1_313230	eukaryotic initiation factor-2, alpha subunit	N/A	0	21.7988	21.845	21.7123	NaN	NaN	NaN	21.5348	21.8866	21.8012	0.146565	0.044487									4.8376	18	8.1	7.32936	6.52252	6.59425	6.44047	6.08966	5.82052	6.03699	6.37022	6.46129	6.49325	3	3	3	2	1	1	3	3	3	39.126
	TGGT1_313340;TGVEG_313340;TGME49_313340	hypothetical protein	N/A	0	NaN	NaN	NaN	NaN	NaN	20.3039	NaN	NaN	NaN	0	NaN									1.5893	2	1.9	7.04376	NaN	NaN	NaN	6.7009	6.66218	6.15954	NaN	NaN	NaN	0	0	1	1	1	1	0	0	0	161.08
	TGVEG_313390;TGME49_313390;TGGT1_313390	ribosomal protein RPL6	HMM: MSGNCQATLGFLPIASHSRAK, NN: MSGNCQATLGFLPIASHSRAKVCFCVDCGTAADVFFFPAPLRAL;N/A	0	24.1995	24.2173	23.9051	24.1166	23.711	23.8072	24.0161	24.3518	23.9853	0.0224738	-0.0104319									19.323	36	31.9	8.14242	7.31986	7.36564	7.1261	7.24197	7.00039	7.22894	7.05269	7.24212	6.91289	6	6	5	5	5	5	5	5	4	31.222
	TGME49_313410;TGGT1_313410;TGVEG_313410A;TGVEG_313410B	proteasome 26S regulatory subunit	HMM: VDSSLPVECSAFAAVSLGLVFVGSCNQE, NN: VDSSLPVECSAFAAVSLGLVFVGSCNQEAAEAI;N/A	0	24.2668	24.2204	24.3424	24.2359	24.5126	24.0623	23.9466	23.7556	23.6348	2.15734	0.497574									100.83	107	32.9	8.1815	7.37787	7.39072	7.31171	7.30505	7.20753	7.3825	6.80024	6.86439	6.94716	17	16	15	15	15	17	7	11	11	117.71
	TGVEG_313560;TGME49_313560;TGGT1_313560	60S ribosomal protein L7a, putative;putative 60S ribosomal protein L7a	N/A	0	NaN	NaN	20.6191	NaN	NaN	NaN	NaN	NaN	NaN	0	NaN									2.6073	9	8.7	7.16673	6.21437	6.39377	6.12843	6.03535	6.08618	6.34282	6.29673	6.16873	6.10061	1	1	1	1	1	1	1	1	1	19.251
	TGGT1_313630;TGVEG_313630;TGME49_313630	amine-terminal region of chorein, A TM vesicle-mediated sorter;hypothetical protein	HMM: MLTSLLLSRLNAALSS, NN: MLTSLLLSRLNAALSS	2	23.0833	22.9537	23.1151	NaN	NaN	NaN	NaN	NaN	NaN	0	NaN									1.5832	6	0.2	7.49152	6.95449	6.94158	6.87377	6.0545	5.71044	5.87636	6.0117	6.20806	5.87258	2	2	2	1	1	1	1	1	1	1451.4
	TGVEG_313670;TGME49_313670;TGGT1_313670	adaptin n terminal region domain-containing protein	N/A	0	19.7707	19.9654	NaN	19.7602	19.5746	NaN	NaN	NaN	19.9756	0	-0.107563									6.5142	11	5	6.80531	6.10278	6.17961	5.65164	5.67771	5.49669	5.5675	5.60348	5.84547	5.95343	3	3	1	2	2	1	1	1	2	107
	TGVEG_314090;TGME49_314090;TGGT1_314090	proteasome beta subunit	N/A	0	NaN	NaN	17.6874	NaN	NaN	NaN	NaN	NaN	NaN	0	NaN									3.2302	5	10.7	6.43148	5.60587	5.72222	5.24591	5.55171	5.08518	5.6123	5.22884	5.32746	5.51076	1	1	1	1	1	1	1	1	1	22.482
	TGVEG_314100;TGME49_314100;TGGT1_314100	tetratricopeptide repeat-containing protein	N/A	0	21.0637	21.3479	20.9745	20.5759	NaN	NaN	NaN	NaN	NaN	0	NaN									5.1436	9	7.6	7.03985	6.44621	6.50105	6.18941	5.91467	5.55807	5.55208	5.65747	5.848	5.87618	3	3	3	2	1	1	1	1	1	64.292
	TGVEG_314400;TGME49_314400;TGGT1_314400	putative pyruvate dehydrogenase E1 component, beta subunit;pyruvate dehydrogenase E1 component, beta subunit, putative	HMM: MVAFPSLSAASAAARTNGF, NN: MVAFPSLSAASAAARTNGFASFCKPGMACKGAGFVRFFSFFAPARGAAAG	0	21.5615	21.8884	21.517	21.8446	20.7623	21.8306	21.1293	21.4787	NaN	0.753953	0.351639									5.6157	12	12.8	7.35799	6.55416	6.62387	6.47338	6.51644	6.26124	6.50767	6.14548	6.25188	5.72318	2	2	2	3	2	2	2	2	1	45.598
	TGVEG_314500;TGME49_314500;TGGT1_314500	subtilisin SUB2	HMM: MARRRPSAIATCFRMILAFFLSFTFSSGADSLLAPSTTQAR, NN: MARRRPSAIATCFRMILAFFLSFTFSSGA	2	NaN	NaN	NaN	NaN	NaN	NaN	NaN	NaN	18.8259	0	NaN									2.4039	2	1.1	6.03052	NaN	NaN	NaN	NaN	NaN	NaN	5.46333	5.57266	5.61108	0	0	0	0	0	0	1	1	1	141.58
	TGVEG_314740;TGME49_314740;TGGT1_314740	PSP protein	N/A	0	NaN	NaN	NaN	NaN	NaN	NaN	NaN	20.8175	NaN	0	NaN									4.0116	3	5.4	6.14613	NaN	NaN	NaN	NaN	NaN	NaN	NaN	6.14613	NaN	1	0	0	0	0	0	0	2	0	82.305
	TGVEG_314810;TGME49_314810;TGGT1_314810	ribosomal protein RPL7	N/A	0	25.3526	25.2915	25.7589	25.6615	25.2784	25.1854	25.8518	26.2261	25.6092	0.858743	-0.42808									22.482	37	19.4	8.60595	7.67435	7.66867	7.70738	7.78699	7.51155	7.64182	7.53633	7.71423	7.54448	4	4	4	4	4	4	3	3	3	30.121
	TGVEG_314820;TGME49_314820;TGGT1_314820	atp synthase F1, epsilon subunit, putative;putative atp synthase F1, epsilon subunit	N/A	0	NaN	NaN	NaN	NaN	NaN	NaN	NaN	NaN	19.7391	0	NaN									2.0133	2	16.4	6.37645	NaN	NaN	NaN	NaN	NaN	NaN	5.95412	5.85157	5.88595	0	0	0	0	0	0	1	1	1	8.4786
	TGVEG_314970;TGME49_314970;TGGT1_314970	root hair defective 3 gtp-binding protein (rhd3) protein	N/A	2	22.4366	22.5379	22.3998	22.5287	22.2031	22.5774	22.3475	22.3958	22.4838	0.355646	0.0490799									21.441	47	18.7	7.66724	6.8044	6.8865	6.65103	6.84147	6.48073	6.87503	6.52149	6.54415	6.56065	6	7	7	7	6	6	6	5	6	98.253
	TGVEG_315210;TGME49_315210;TGGT1_315210	putative rhoptry protein;rhoptry protein, putative	N/A	7	NaN	NaN	NaN	NaN	NaN	NaN	23.2681	22.5204	23.3738	0	NaN									6.6806	11	4.8	7.75082	6.83674	6.93871	6.592	6.7987	6.5942	6.79669	6.79532	6.66313	6.98027	1	1	1	1	1	1	3	3	3	115.86
	TGGT1_315220;TGVEG_315220;TGME49_315220	rhoptry protein ROP14	N/A	11;9	24.0677	24.1469	24.2282	24.1867	24.377	24.102	24.7421	24.4789	24.5534	2.08778	-0.443898									42.473	75	14.5	8.22819	7.33383	7.2206	7.31794	7.24443	7.30722	7.42157	7.08009	7.15445	7.29234	9	7	9	7	8	9	6	8	8	121.92
	TGGT1_315320;TGVEG_315320;TGME49_315320	SAG-related sequence SRS52A	HMM: MARISVVPIRLIMTGSLFFVVVVLMSTTALRAE, NN: MARISVVPIRLIMTGSLFFVVVVLMSTTALRAE;HMM: MARISVVPIRLITMGSLFFVVVVLMSTTALRAE, NN: MARISVVPIRLITMGSLFFVVVVLMSTTALRAE	1	25.2993	25.4593	25.3692	25.3755	25.5893	25.4652	25.6863	25.7494	25.6428	2.32673	-0.316917									28.961	61	50.5	8.58303	7.62277	7.68532	7.5131	7.68466	7.62583	7.74313	7.46852	7.62403	7.62724	7	9	8	10	9	10	7	7	7	34.236
	TGGT1_315600;TGVEG_315600;TGME49_315600	MCM2/3/5 family protein	N/A	3	NaN	NaN	NaN	22.2319	NaN	NaN	NaN	NaN	NaN	0	NaN									1.7089	1	1	6.65853	NaN	NaN	NaN	6.65853	NaN	NaN	NaN	NaN	NaN	0	0	0	1	0	0	0	0	0	130.19
	TGVEG_315610;TGME49_315610;TGGT1_315610	hypothetical protein	N/A	0	25.466	25.1174	25.3475	24.9961	25.372	25.1786	25.5359	25.5485	25.4603	0.900563	-0.204608									86.165	41	23.4	8.52722	7.66907	7.60491	7.54964	7.49726	7.52369	7.62994	7.46106	7.57879	7.60203	2	2	2	2	2	2	2	2	2	15.971
	TGVEG_315620;TGME49_315620;TGGT1_315620	putative vacuolar ATP synthase subunit C;vacuolar ATP synthase subunit C, putative	N/A	0	NaN	20.7072	19.9665	NaN	NaN	NaN	NaN	NaN	NaN	0	NaN									3.0052	8	9.9	6.74544	5.97935	6.25809	5.9431	5.53514	5.36273	5.70641	5.38643	5.45509	5.49357	1	2	2	1	1	1	1	1	1	46.075
	TGGT1_315740	SAG-related sequence SRS54	N/A	0	NaN	NaN	NaN	NaN	NaN	NaN	21.7487	22.0837	NaN	0	NaN									3.4665	4	8	6.87627	NaN	5.94528	NaN	5.70509	NaN	NaN	6.35948	6.51186	5.774	0	1	0	1	0	0	2	2	1	41.68
	TGVEG_315770;TGME49_315770;TGGT1_315770	cytochrome p450 superfamily protein	N/A	1	23.4413	23.4551	22.9124	23.6181	23.2203	23.5598	22.9428	23.3906	23.1424	0.192859	0.110987									20.92	40	28	7.90375	6.72416	6.77106	6.52844	7.11724	6.86504	7.03495	6.95754	7.15884	7.03314	5	4	4	7	6	6	7	8	9	62.584
	TGVEG_315980;TGME49_315980;TGGT1_315980	EREBP-4 family protein	N/A	0	21.0047	NaN	NaN	NaN	NaN	NaN	NaN	NaN	NaN	0	NaN									2.5563	4	8.3	6.62681	6.32305	NaN	NaN	6.07339	NaN	5.97614	NaN	NaN	NaN	1	0	0	2	0	1	1	0	0	33.227
	TGVEG_316280;TGME49_316280;TGGT1_316280	transporter, major facilitator family protein	N/A	8	NaN	NaN	NaN	NaN	NaN	20.6478	NaN	NaN	NaN	0	NaN									4.9481	11	5.6	7.05607	5.87396	5.99498	5.92571	6.29938	5.95551	6.26307	6.04747	6.14718	6.19103	1	1	1	2	2	2	1	1	1	57.918
	TGVEG_316310;TGME49_316310;TGGT1_316310	superoxide dismutase	N/A	0	23.3414	23.8628	24.1186	23.4977	23.3612	23.4042	23.7625	23.4952	23.7026	0.190666	0.120805									8.3311	28	26.4	8.03133	7.16527	7.31929	7.0773	6.95872	6.67716	7.07126	7.08106	7.00052	7.09142	4	4	3	3	2	3	4	5	4	22.55
	TGGT1_316400B;TGVEG_316400;TGME49_316400;TGVEG_231770;TGME49_231770;TGGT1_231770	alpha tubulin TUBA1;alpha-tubulin I, putative;putative alpha-tubulin I	N/A	0	26.0838	26.2901	25.9148	26.1335	26.0048	26.0089	26.08	26.1304	25.9835	0.0968254	0.0315882									48.487	97	58.3	8.75918	7.83693	7.91305	7.7182	8.06367	7.62996	7.89315	7.59093	7.6559	7.70453	10	10	10	11	10	11	9	9	10	47.849
	TGVEG_317720B;TGME49_317720;TGGT1_317720	eukaryotic translation initiation factor 3 subunit 7, putative;putative eukaryotic translation initiation factor 3 subunit 7	N/A	0	21.4654	21.4272	21.4365	21.8277	21.3326	21.2724	21.5586	21.4697	20.9157	0.252921	0.128393									18.122	15	27.8	7.35639	6.60197	6.56885	6.30393	6.53995	6.39438	6.3437	6.21373	6.261	6.14258	4	4	2	3	4	3	3	2	2	32.314
	TGVEG_318150;TGME49_318150;TGGT1_318150	transporter, major facilitator family protein	N/A	8	NaN	NaN	17.7404	NaN	NaN	NaN	NaN	NaN	NaN	0	NaN									2.1997	9	2.7	6.52787	5.55956	5.68488	5.26188	5.62708	5.66371	5.70541	5.29499	5.437	5.68073	1	1	1	1	1	1	1	1	1	65.143
	TGVEG_318160;TGME49_318160;TGGT1_318160	MSP (Major sperm protein) domain-containing protein	N/A	1	NaN	NaN	20.7948	NaN	NaN	NaN	NaN	NaN	NaN	0	NaN									2.7255	3	6.7	6.98534	5.97483	6.07748	6.18136	6.02069	6.02873	6.14693	6.16008	NaN	6.01924	1	1	1	1	1	1	1	0	1	25.975
	TGME49_318230;TGGT1_318230;TGVEG_318230	phosphoglycerate kinase PGKI	N/A	0	25.3164	25.0678	25.1886	25.3921	25.0143	25.1021	25.5331	25.485	25.2001	0.786192	-0.215165									58.234	89	52.3	8.51107	7.48576	7.57938	7.38977	7.7241	7.45173	7.7295	7.31139	7.55269	7.60412	8	11	10	11	11	11	7	12	11	44.676
	TGVEG_318310;TGME49_318310;TGGT1_318310	transketolase	N/A	0	22.5616	22.5237	22.7314	22.7457	22.4778	22.3662	23.1559	22.8758	22.5367	0.5887	-0.250566									15.863	33	17	7.71683	6.78136	6.85833	6.81051	6.71996	6.59501	6.66874	6.75932	6.86769	6.73302	6	7	6	4	3	3	6	7	4	76.904
	TGVEG_318410;TGME49_318410;TGGT1_318410	putative TCP-1 chaperonin;TCP-1 chaperonin, putative	N/A	0	22.8075	22.4813	22.2661	22.473	22.5882	22.2618	22.3836	22.2684	22.0665	0.695445	0.278756									9.557	29	22	7.65817	6.95398	6.79569	6.54755	6.80224	6.64408	6.78796	6.44417	6.56834	6.52875	4	4	3	5	4	5	3	3	4	58.665
	TGVEG_318430;TGME49_318430;TGGT1_318430	malate dehydrogenase MDH	N/A	0	23.1049	23.3605	22.9968	23.2856	23.2231	23.0025	23.1924	23.3992	22.9152	0.0282829	-0.0148926									18.666	47	28.8	7.8766	6.92689	7.15366	6.89892	7.02645	6.83134	6.8466	6.79292	6.89691	6.78664	7	8	6	8	6	5	6	6	5	54.703
	TGVEG_318440;TGME49_318440;TGGT1_318440	helicase associated domain (ha2) protein	N/A	0	NaN	NaN	16.44	NaN	NaN	NaN	NaN	NaN	NaN	0	NaN									1.9998	9	0.5	6.00204	5.17067	5.18182	4.8704	4.97488	5.01716	5.05918	4.886	5.12665	5.0278	1	1	1	1	1	1	1	1	1	236.9
	TGVEG_318570;TGME49_318570;TGGT1_318570	SFT2 family protein	N/A	4	NaN	NaN	NaN	NaN	NaN	NaN	NaN	NaN	20.383	0	NaN									2.0222	3	13.6	6.9661	NaN	NaN	NaN	6.19604	5.97104	6.52393	5.95361	6.11434	6.0798	0	0	0	1	2	1	1	1	1	33.225
	TGVEG_318580;TGME49_318580;TGGT1_318580	glucosephosphate-mutase GPM2	N/A	0	20.6285	20.675	20.9068	20.6198	20.6854	20.5699	20.7122	20.7075	20.3844	0.416084	0.135386									6.2283	13	11.4	7.12054	6.20019	6.2701	6.1926	6.20145	6.11584	6.2251	6	6.08877	6.1433	2	3	2	2	2	2	3	2	3	65.895
	TGVEG_318710;TGME49_318710;TGGT1_318710	ATP-binding cassette sub-family F member 1	N/A	0	NaN	NaN	NaN	NaN	NaN	NaN	NaN	NaN	18.4445	0	NaN	+								1.5893	2	2.5	5.8158	NaN	NaN	NaN	NaN	NaN	NaN	5.26839	5.19117	5.49627	0	0	0	0	0	0	1	1	1	89.162
	TGVEG_319340;TGME49_319340;TGGT1_319340	hypothetical protein;putative kelch motif protein	HMM: MACDRLAAMLPSQRRGLCCRGRNALLFFALFCFAVCLLGH, NN: MACDRLAAMLPSQRRGLCCRGRNALLFFALFCFAVCLLGH	1	23.462	23.4733	23.3671	23.7408	23.5391	23.152	23.4874	23.6838	23.3998	0.421892	-0.0895068									16.089	31	17.7	7.97224	7.1214	7.16459	7.03495	7.08661	6.9208	6.98477	6.84964	6.96418	6.93741	5	5	5	5	5	5	5	5	5	52.432
	TGVEG_319350;TGME49_319350;TGGT1_319350	SAG-related sequence SRS17B	HMM: MASQKVLVCLTVAGCLLATFHTFCASVSAASAG, NN: MASQKVLVCLTVAGCLLAT	2	22.645	22.6221	22.2251	22.4436	23.0762	22.8383	23.0791	22.9681	23.1918	1.74124	-0.582275									14.938	28	26.9	7.76524	6.77132	6.52021	6.39273	6.85109	6.9943	7.02975	6.64473	6.75229	6.94503	3	2	2	6	6	6	4	5	5	39.375
	TGVEG_319550;TGME49_319550;TGGT1_319550	membrane protein C17G8.08c, putative;putative membrane protein C17G8.08c	N/A	6	NaN	NaN	19.9365	NaN	NaN	NaN	NaN	NaN	NaN	0	NaN									2.4778	6	3.8	6.59132	5.56819	NaN	5.92293	5.72809	NaN	5.71502	5.76396	5.81325	5.61301	1	1	1	1	0	1	1	1	1	36.187
	TGVEG_319850;TGME49_319850;TGGT1_319850	splicing factor U2AF family SnRNP auxilary factor large subunit, RRM domain-containing protein	N/A	0	20.2858	20.3841	NaN	NaN	NaN	NaN	20.0506	20.3662	20.0709	0.528038	0.172347	+								6.1888	6	9.1	6.86672	6.23399	6.29557	5.62664	5.63326	5.47933	5.72478	5.69555	5.90005	5.84059	3	3	1	1	1	1	2	2	2	51.681
	TGVEG_319920;TGME49_319920;TGGT1_319920	2-oxo acid dehydrogenases acyltransferase (catalytic domain) domain-containing protein	HMM: MLATRRVFSASPRLACARAGIAQAF, NN: MLATRRVFSASPRLACAR;HMM: MLATRRVFSASPRLVCARAGIAQAF, NN: MLATRRVFSASPRLVCARAGIAQAF	0	25.4069	25.3926	25.49	25.547	25.6864	25.3797	26.1373	25.9442	25.79	2.13286	-0.52726									66.551	64	21.4	8.6149	7.63923	7.63612	7.54825	7.64462	7.51013	7.69928	7.64812	7.79199	7.75498	7	7	7	8	7	8	7	7	10	70.304
	TGME49_320020;TGGT1_320020;TGVEG_320020	transporter, major facilitator family protein	N/A	12	25.02	24.9733	25.0846	25.0486	25.4727	25.055	25.7413	25.3429	25.3253	1.47434	-0.443884									135.08	93	19.9	8.56263	7.63416	7.69061	7.54997	7.66779	7.47663	7.75651	7.50299	7.49572	7.61222	5	6	6	6	5	7	5	6	6	62.981
	TGVEG_320050;TGME49_320050;TGGT1_320050	ribosomal protein RPL5	N/A	0	25.5343	25.4213	25.3857	25.5205	25.6074	25.386	25.392	25.5165	25.2295	0.290308	0.0677827									21.398	72	41.9	8.5692	7.71077	7.72547	7.57208	7.57813	7.56404	7.7743	7.4139	7.53679	7.53988	8	8	8	7	7	10	7	7	7	35.341
	TGME49_320180;TGGT1_320180;TGVEG_320180	SAG-related sequence SRS16C	HMM: MVMMGSMQQRRGGLRSNARQLLAVCMSGVVFFSSGQAVAD, NN: MVMMGSMQQRRGGLRSNARQLLAVCMSGVVFFSSGQAVAD;HMM: MVMMMGSMQQRRGGLRSNARQLLAVCMSGVLFLSSGQAVAD, NN: MVMMMGSMQQRRGGLRSNARQLLAVCMSGVLFLSSGQAVAD	1	NaN	19.8807	NaN	NaN	NaN	NaN	20.5973	19.9634	19.9469	0	-0.288518									3.6867	7	7.3	6.74814	5.65226	6.01883	5.82135	NaN	5.63849	5.53866	5.96609	5.9115	5.9648	1	2	1	1	1	1	2	2	2	42.345
	TGVEG_320210;TGME49_320210;TGGT1_320210	WD domain, G-beta repeat domain containing protein	N/A	0	NaN	19.617	NaN	NaN	NaN	NaN	NaN	NaN	NaN	0	NaN									12.482	7	12.4	5.93671	NaN	5.93671	NaN	NaN	NaN	NaN	NaN	NaN	NaN	1	2	1	1	0	0	1	1	0	56.08
	TGVEG_320220;TGME49_320220;TGGT1_320220	putative ubiquinol cytochrome c oxidoreductase;ubiquinol cytochrome c oxidoreductase, putative	N/A	0	NaN	NaN	NaN	NaN	21.7973	22.2608	NaN	NaN	NaN	0	NaN									2.975	8	12.7	7.43626	6.69595	6.61906	6.34982	6.50538	6.45408	6.74456	NaN	6.41651	6.23897	2	2	1	1	2	2	0	1	1	54.777
	TGME49_320570;TGGT1_320570;TGVEG_320570	elongation factor Tu, putative;putative elongation factor Tu	N/A	0	NaN	NaN	NaN	21.1352	NaN	20.8164	NaN	NaN	NaN	0	NaN									70.678	13	16.7	7.09342	6.39515	6.12074	5.86684	6.33592	5.99464	6.30421	6.00745	5.98029	5.85562	3	4	1	3	2	2	2	1	1	63.549
	TGVEG_320630;TGME49_320630;TGGT1_320630	phosphotransferase enzyme family protein	HMM: MQVLACVLGIVCLYLRTAPAS, NN: MQVLACVLGIVCLYLRTAPAS	0	NaN	NaN	19.4618	NaN	NaN	NaN	NaN	NaN	NaN	0	NaN									2.034	2	4.8	6.2843	5.74824	5.88181	5.78005	NaN	NaN	NaN	NaN	NaN	NaN	1	1	1	0	0	0	1	0	0	69.411
	TGGT1_321300;TGVEG_321300;TGME49_321300	autophagy-related 12 variant 1, putative;putative autophagy-related 12 variant 1	N/A	0	NaN	NaN	NaN	NaN	NaN	NaN	NaN	NaN	22.8617	0	NaN									1.8279	4	4.3	7.40107	6.12975	5.99608	5.74991	6.06224	NaN	6.32746	6.76483	6.81181	6.82595	1	1	1	1	0	1	1	1	1	73.446
	TGVEG_321400;TGME49_321400;TGGT1_321400	microsomal signal peptidase (spc12) domain-containing protein	N/A	2	NaN	NaN	NaN	NaN	NaN	NaN	NaN	NaN	21.7441	0	NaN	+								4.2732	8	20.3	6.95575	5.85804	6.06066	5.83095	5.93529	5.7182	5.93332	5.74851	5.77322	6.48954	1	1	1	1	1	1	1	1	2	14.205
	TGVEG_321500;TGME49_321500;TGGT1_321500	RNA recognition motif-containing protein	N/A	0	NaN	NaN	NaN	NaN	NaN	NaN	NaN	NaN	20.5229	0	NaN									16.626	9	10.5	6.71326	NaN	5.87413	NaN	NaN	NaN	6.2406	5.9202	5.71808	6.12189	0	1	1	0	0	2	1	2	2	50.952
	TGME49_321520;TGVEG_321520;TGGT1_321520	CS domain protein;hypothetical protein	N/A	0;1	NaN	NaN	20.8685	NaN	NaN	NaN	NaN	NaN	NaN	0	NaN									7.9464	11	7.1	7.0057	6.22435	6.43043	6.20352	NaN	NaN	NaN	6.23581	6.02473	6.1412	1	1	1	0	0	1	1	1	1	24.783
	TGME49_321590;TGGT1_321590;TGVEG_321590	hypothetical protein;putative transmembrane protein	N/A	6	NaN	NaN	NaN	NaN	NaN	NaN	19.7507	NaN	NaN	0	NaN									1.906	2	8.3	6.74539	NaN	NaN	NaN	6.11998	6.22603	6.30417	5.73927	NaN	NaN	0	0	0	1	1	1	1	0	0	42.352
	TGVEG_321620;TGME49_321620;TGGT1_321620;TGME49_326100	dynamin gtpase;dynamin-related protein DRPB	N/A	0;1	22.9287	23.0779	22.8613	23.4197	23.5192	23.0718	23.5799	23.1333	22.9288	0.565789	-0.25804									20.889	41	20.1	7.86598	6.83948	6.93653	6.61134	6.97294	6.68707	6.92944	7.00078	7.09486	6.93401	6	6	5	7	5	6	8	10	9	95.93
	TGVEG_321680;TGME49_321680;TGGT1_321680	hyaluronan/mRNA-binding family protein;hypothetical protein	N/A	0	NaN	NaN	20.8687	NaN	NaN	NaN	NaN	NaN	NaN	0	NaN									14.306	6	14.5	6.92283	5.64262	6.51156	6.20358	6.0917	NaN	NaN	5.59975	5.95033	5.74992	1	2	1	1	0	0	2	1	1	40.688
	TGVEG_324600;TGME49_232940;TGGT1_324600;TGME49_324600	heat shock protein;heat shock protein HSP20	N/A	0	25.9294	26.038	26.2703	25.8929	25.9897	26.0995	26.3469	26.2637	26.0443	0.44175	-0.139052									59.713	92	86.5	8.76701	7.77674	7.8783	7.80509	7.78827	7.69746	7.90279	7.76343	7.82115	7.84615	10	11	9	12	9	13	10	9	10	20.266
	TGGT1_360830	nucleoside-triphosphatase	N/A	0	24.7921	24.9666	25.0066	25.1188	24.8355	24.7889	25.4423	25.4363	24.8827	0.777218	-0.332008									15.983	50	72.2	8.43761	7.51787	7.55898	7.48964	7.51298	7.1907	7.52492	7.41395	7.56056	7.47683	6	6	5	5	4	6	5	5	6	40.518
	TGGT1_363030;TGVEG_363030;TGME49_215785;TGME49_215775;TGVEG_215775;TGGT1_215775	rhoptry protein ROP2A;rhoptry protein ROP8	HMM: MENCASVRSSSCLIWLAAAFFVSALGH, NN: MENCASVRSSSCLIWLAAAFFVSALGH;HMM: MFSVLRNRNMRHGPSIGSSSCLIWLAAAFFVSALGH, NN: MFSVLRNRNMRHGPSIGSSSCLIWLAAAFFVSALGH;N/A	0;1	24.7994	24.5651	24.2069	24.7531	24.6867	24.646	24.5741	24.8217	24.6684	0.36788	-0.164323									19.305	48	32.4	8.31881	7.46084	7.34455	7.04937	7.51724	7.47893	7.37473	7.29612	7.31589	7.27761	7	8	6	6	6	7	7	7	7	64.031
	TGGT1_408800	NTPase	HMM: MWLPVYVPLLLVFGVSLSLPHGSLGT, NN: MWLPVYVPLLLVFGVSLSLPHGSLGT	0	NaN	NaN	22.9714	NaN	NaN	NaN	NaN	NaN	NaN	0	NaN									2.7848	9	41	7.77231	6.84182	6.91127	6.83656	6.90325	6.63944	6.8084	6.80303	6.84726	6.70342	1	1	1	1	1	1	1	1	1	20.959
	TGGT1_410360;TGVEG_220950;TGVEG_441370;TGME49_323110	hypothetical protein;putative transmembrane protein	HMM: MWRIWRCRLSFLFATGCLLGALTAGLGS, NN: MWRIWRCRLSFLFATGCLLGALTA;N/A	0;1;2	24.9243	24.8188	24.7079	24.7689	24.8867	24.6063	24.8214	24.981	24.6257	0.0212513	0.00766436									59.16	35	28.8	8.37992	7.6002	7.44404	7.43409	7.57029	7.42042	7.50959	7.11257	7.22412	7.2899	4	3	4	4	4	4	3	3	3	38.079
	TGGT1_410370;TGVEG_442180	hypothetical protein;putative transmembrane protein	HMM: MWRIWRCRLSFLFATGCLLGALTAGLGS, NN: MWRIWRCRLSFLFATGCLLGALTA;N/A	0;1	24.741	24.8308	24.6844	24.7008	24.521	24.6858	24.6421	24.799	24.58	0.430515	0.0783704									47.13	55	36.8	8.35518	7.47806	7.50671	7.36194	7.50623	7.25271	7.47973	7.19745	7.41637	7.28715	8	7	7	7	6	9	7	8	7	47.738
	TGGT1_411470	putative transmembrane protein	HMM: MWRIWRCRLSFLFVTGCLLGALTAGLGS, NN: MWRIWRCRLSFLFVTGCLLGALTA	1	NaN	NaN	18.2111	NaN	NaN	NaN	NaN	NaN	NaN	0	NaN									2.796	5	27.2	6.4704	5.72775	5.73446	5.40355	5.6009	NaN	NaN	5.97623	5.4442	NaN	1	1	1	1	0	0	1	1	0	40.32
	TGGT1_411590;TGVEG_442670	nucleoside-triphosphatase	HMM: MWLPVYVPLLLVFGVSLSLPQGSLGT, NN: MWLPVYVPLLLVFGVSLSLPQGSLGT;N/A	0	NaN	NaN	18.9754	NaN	NaN	NaN	NaN	NaN	NaN	0	NaN									3.7209	10	49.9	6.87584	5.86646	5.70228	5.84954	6.18418	5.68813	5.69933	5.79391	5.9867	6.164	1	1	1	1	1	1	1	1	1	46.331
	TGME49_200250;TGVEG_439620;TGVEG_200250;TGVEG_200240;TGME49_200240;TGGT1_200250;TGGT1_200240;TGGT1_200230;TGME49_200230	microneme protein MIC17A;microneme protein MIC17B;microneme protein MIC17C;putative microneme protein	HMM: MDALKTLLNKGITLAVVVAAVLLQIRAVALQ, NN: MDALKTLLNKGITLAVVVAAVLLQIRAV;HMM: MDALKTLLNKGITLAVVVAAVLLQIRAVALQ, NN: MDALKTLLNKGITLAVVVAAVLLQIRAVALQ;HMM: MDALKTVFNRRIALPVVVAAALLHNSAEAL, NN: MDALKTVFNRRIALPVVVAAALLHNSAEAL;HMM: MDTVTTLFNRKIALSFVVAAALLHNSAEAL, NN: MDTVTTLFNRKIALSFVVAAALLHNSAEAL;HMM: MDTVTTLFNRKIALSFVVVAALLHNSAEAL, NN: MDTVTTLFNRKIALSFVVVAALLHNSAEAL;HMM: METVTTLFNRKIALSFVVAAALLHNSAEAL, N…	0;1	NaN	NaN	NaN	NaN	NaN	NaN	NaN	18.1984	NaN	0	NaN									3.5303	3	9.1	5.35771	NaN	NaN	NaN	NaN	NaN	NaN	NaN	5.35771	NaN	1	1	0	0	0	0	0	1	0	38.753
	TGME49_205050	hypothetical protein	N/A	0	NaN	NaN	NaN	NaN	NaN	NaN	32.8784	NaN	32.7481	0	NaN									2.3489	10	1.3	10.4234	9.31896	9.41497	9.37672	8.68877	8.64307	8.66438	9.72777	9.76623	9.83722	1	1	1	1	1	1	1	1	1	133.82
	TGVEG_219320;TGME49_219320;TGGT1_219320	acid phosphatase GAP50	HMM: MAGAPVAAAPAASSRVAGDSGRSRALSSFFSVFSLCVFSVFLATPTAVVAQ, NN: MAGAPVAAAPAASSRVAGDSGRSRALSSFFSVFSLCVFSVFLATPTAVVAQ	2	25.7407	25.6184	25.6695	25.9752	25.6652	25.5915	25.6883	26.0173	25.7209	0.528494	-0.13265									64.374	95	32.5	8.66002	7.7741	7.75377	7.68435	7.78255	7.63035	7.74247	7.52965	7.68235	7.71642	11	11	11	10	10	10	9	9	11	46.606
	TGVEG_224350;TGME49_224350;TGGT1_224350A	aminopeptidase N, putative;putative aminopeptidase N	N/A	0;1	24.073	24.2391	24.009	24.0471	24.1768	24.0421	24.2878	24.2956	23.9281	0.172459	-0.0634581									34.089	86	16.4	8.17088	7.29274	7.38187	7.10599	7.23867	7.11876	7.3537	6.99683	7.20156	7.109	12	12	11	14	11	14	10	11	11	156.88
	TGME49_225270;TGGT1_225270;TGVEG_225270	hypothetical protein	N/A	0	NaN	NaN	NaN	NaN	NaN	NaN	NaN	NaN	24.0787	0	NaN									1.6462	2	1.2	7.21045	NaN	NaN	NaN	5.50943	5.53368	NaN	NaN	NaN	7.19232	0	0	0	1	1	0	0	0	1	349.64
	TGME49_226860;TGVEG_226860;TGGT1_226860	SAG-related sequence SRS67	HMM: MAFRKPLFSGRQWVALMCVFAAVGGK, NN: MAFRKPLFSGRQWVALMCVFAAVGGK;HMM: MGFRKPVFSGRQWVALMCVFAAVGGK, NN: MGFRKPVFSGRQWVALMCVFAAVGGK	0;1	22.3227	22.5248	22.6412	22.7121	22.69	22.9301	22.3829	22.8365	22.8985	0.487527	-0.209723	+								9.3268	17	28.6	7.74979	6.85249	6.86571	6.82459	6.84345	6.65569	6.97878	6.43265	6.84235	6.64181	4	3	2	3	3	3	3	4	3	23.135
	TGVEG_230210;TGME49_230210;TGGT1_230210	alveolin domain containing intermediate filament IMC10	N/A	0	25.0994	24.8593	25.3269	24.9809	24.8592	24.6477	25.0791	24.8935	24.6598	0.528004	0.217727									51.892	86	38.8	8.41639	7.61376	7.50788	7.62455	7.48491	7.30068	7.44989	7.31439	7.34418	7.38034	12	11	12	9	9	9	9	11	11	61.187
	TGME49_237130;TGME49_322210;TGME49_330000	apocytochrome b, putative;cytochrome b;cytochrome b, putative	HMM: MSLFRAHLVFYRCALNLNSSYNFGFLVAMTFVLQIITGITLAF, NN: MSLFRAHLVFYRCALNLNSSYNFGFLVAMTFVLQIITGITLAF;HMM: MVSRTLSLSMSLFRAHLVFYRCALNLNSSYNFGFLVAMTFVLQIITGITLAF, NN: MVSRTLSLSMSLFRAHLV	4;6;8	22.7154	22.5653	22.1756	22.5043	21.7498	22.5449	22.9472	NaN	22.5709	0.450162	-0.273639									4.7118	15	16.7	7.66242	6.85898	6.79745	6.61152	6.74196	6.44113	6.81815	6.69857	6.4747	6.74323	2	2	2	2	2	2	2	2	2	17.641
	TGME49_240340;TGVEG_440880;TGVEG_440870;TGGT1_240340A;TGGT1_240340B	toxoplasma gondii family E protein;Toxoplasma gondii family E protein	HMM: MAVRKRCMVSFVSYALFTMSSPGQTSLA, NN: MAVRKRCMVSFVSYALFTMSSPGQ;N/A	0;1	NaN	NaN	NaN	NaN	NaN	18.9715	NaN	NaN	NaN	0	NaN	+								1.7539	2	1.8	8.01778	NaN	NaN	NaN	8.0154	NaN	5.75844	NaN	NaN	NaN	0	1	0	1	0	1	0	0	0	155.91
	TGME49_244320	ribosomal protein RPL24	N/A	0	NaN	NaN	NaN	NaN	NaN	NaN	NaN	20.0031	NaN	0	NaN									3.6108	5	4.1	6.71053	6.14977	6.24524	6.06748	NaN	NaN	NaN	NaN	5.90095	NaN	1	2	1	1	1	0	0	1	0	32.693
	TGVEG_257090;TGME49_257090	NAC domain-containing protein	N/A	0	NaN	NaN	NaN	NaN	NaN	NaN	NaN	NaN	19.0979	0	NaN	+								2.8642	3	7.5	6.25334	NaN	NaN	NaN	NaN	NaN	NaN	5.8255	5.79918	5.69295	0	0	1	0	0	0	2	1	1	38.782
	TGVEG_258870;TGME49_258870;TGGT1_258870B;TGGT1_258870A	hypothetical protein;putative transmembrane protein	N/A	1;2	23.4284	23.4472	23.2857	23.5964	23.562	23.5103	23.8379	23.986	23.633	1.71033	-0.431838	+								30.619	35	12.9	7.98688	7.03711	7.08016	6.92654	7.04139	6.97573	6.78019	7.06793	7.17794	7.09412	6	6	6	5	4	4	7	7	6	101.6
	TGME49_263060;TGVEG_263060B;TGGT1_263060;TGVEG_263060A;TGGT1_361650	proteasome/cyclosome repeat protein;Proteasome/cyclosome repeat-containing protein	HMM: MSAGAVTAQPLPSPKAGLGAAMAFAPPASSAA, NN: MSAGAVTAQPLPSPKAGLGAAMAFAPPASSAA;N/A	0	23.211	23.082	23.1554	23.0274	23.1933	22.9893	23.0478	23.0474	22.9888	1.34636	0.121475									22.557	45	14.7	7.85166	7.02772	6.98447	6.95654	6.9873	6.87143	6.88115	6.707	6.70849	6.82933	7	9	8	8	6	7	6	6	6	125.59
	TGVEG_294800;TGVEG_286420;TGME49_294800;TGME49_286420;TGGT1_286420A;TGGT1_294800A;TGGT1_294800B;TGGT1_359490;TGGT1_286420B	elongation factor 1-alpha;elongation factor 1-alpha (EF-1-ALPHA), putative;putative elongation factor 1-alpha (EF-1-ALPHA)	N/A	0	30.1817	30.3761	30.1357	30.4511	29.9719	30.3901	29.833	30.2836	30.2836	0.228877	0.097765	+								70.722	331	68.1	10.0131	9.1395	9.18633	9.00294	9.17759	8.90253	9.0735	8.98696	9.02338	8.94042	19	19	18	21	20	21	18	18	20	49.005
	TGME49_286760	hypothetical protein	HMM: MSAAMAASPAVASATDALCH, NN: MSAAMAASPAVASATDAL	0	NaN	NaN	21.3757	NaN	NaN	NaN	NaN	NaN	NaN	0	NaN									1.9305	4	3.3	7.54855	6.91807	6.96144	6.3562	NaN	NaN	NaN	6.6679	6.69153	6.78467	1	1	1	0	0	0	1	1	1	49.359
	TGME49_290840;TGVEG_290840;TGGT1_290840	serine protease	HMM: MVGGVCSPFAVADFSSLLALKSPFFAALGLSRLFCMQPVETHSH, NN: MVGGVCSPFAVADFSSLLALKSPFFAALGLSRLFCM;N/A	1;2	NaN	NaN	NaN	NaN	NaN	NaN	NaN	NaN	25.2288	0	NaN									3.1981	3	2.7	7.54739	5.45609	5.39995	NaN	NaN	NaN	NaN	4.77397	5.06837	7.53852	1	1	0	0	0	0	1	1	2	102.74
	TGME49_308090	rhoptry protein ROP5	HMM: MATKLARLATWLVLVGCLLWRAGAV, NN: MATKLARLATWLVLVGCLLWRAGAV	0	NaN	NaN	NaN	NaN	NaN	23.731	NaN	NaN	NaN	0	NaN									3.6828	9	24.4	7.87234	6.97501	6.91337	6.6652	6.84681	6.91963	7.19117	6.50837	6.74456	7.1013	1	1	1	1	1	1	1	1	1	61.101
	TGVEG_314530;TGME49_314530;TGGT1_314530	RPAP1 family protein;RPAP1 family, C-terminal protein	N/A	0	NaN	NaN	NaN	NaN	NaN	19.9512	NaN	NaN	NaN	0	NaN									1.7521	1	1.4	6.7258	NaN	NaN	NaN	6.10133	6.33377	6.05335	5.88563	NaN	NaN	0	0	0	2	2	2	1	0	0	330.72
	TGVEG_212910	rhomboid protease ROM3	N/A	8	NaN	NaN	NaN	NaN	NaN	22.5223	NaN	NaN	NaN	0	NaN									2.5033	1	8.9	6.99041	NaN	NaN	NaN	6.48601	NaN	6.82734	NaN	NaN	NaN	0	0	0	1	0	1	0	0	0	31.386
	TGVEG_215220;TGGT1_215220;TGME49_215220	hypothetical protein	N/A	0	25.427	25.2214	25.293	25.4071	25.4583	25.0302	25.7143	25.4781	25.2372	0.468786	-0.162774									23.22	65	29.9	8.53409	7.71315	7.66037	7.62076	7.55835	7.43672	7.53462	7.52831	7.55349	7.55161	9	10	7	8	7	9	7	8	8	63.201
	TGVEG_279100	putative transmembrane protein	HMM: MWRIWRCRLSFLFVTGCLLGALTAGLGS, NN: MWRIWRCRLSFLFVTGCLLGALTA	1	NaN	NaN	22.3338	NaN	NaN	NaN	NaN	NaN	NaN	0	NaN									2.8526	11	28.5	7.67402	6.77608	6.78342	6.64464	6.68392	6.60391	6.71384	6.73621	6.79303	6.70527	1	1	1	1	1	1	1	1	1	47.657
	TGVEG_280660;TGME49_280660;TGGT1_280660	HECT-domain (ubiquitin-transferase) domain-containing protein	N/A	0	NaN	NaN	NaN	NaN	NaN	NaN	NaN	NaN	22.9635	0	NaN	+								2.307	5	0.2	7.41128	6.33161	6.69637	5.86923	NaN	NaN	NaN	6.93543	6.3258	6.8566	1	1	2	0	0	0	2	2	2	1711
	TGVEG_285980;TGME49_285980;TGGT1_285980B;TGGT1_285980A	glucosephosphate-mutase GPM1	N/A	0	30.4914	30.4595	30.5515	30.4298	30.5964	30.4936	30.2227	29.957	30.0495	2.17084	0.424426	+	+	+	+					323.31	518	69.7	10.0945	9.22807	9.23459	9.12875	9.17774	9.13075	9.29765	8.9528	8.94415	9.02629	30	31	31	33	33	35	27	31	33	70.572
	TGVEG_297870;TGME49_297870;TGGT1_297870	hypothetical protein	N/A	0	NaN	20.4019	NaN	NaN	NaN	NaN	NaN	NaN	NaN	0	NaN									3.597	4	6.2	6.47188	5.45494	6.17298	6.00441	NaN	NaN	5.25399	NaN	NaN	NaN	1	3	2	0	0	1	0	0	0	94.694
	TGVEG_300320	dimethyladenosine transferase	HMM: MVGALRFPSFLRSRSLAARLRASLFYLCLHFLLLQHAALSSGA, NN: MVGALRFPSFLRSRSLAARLRASLFYLCLHFLLLQHAALSSGA	0	NaN	NaN	22.207	NaN	NaN	NaN	NaN	NaN	NaN	0	NaN									1.5421	2	1.5	6.91418	NaN	NaN	6.60646	NaN	NaN	NaN	NaN	NaN	6.61974	0	0	1	0	0	0	0	0	1	100.42
	TGVEG_440110;TGME49_277240;TGGT1_408820	NTPase;NTPase I	HMM: MWLPVYVPLLLVFGVSLSLPQGSLGT, NN: MWLPVYVPLLLVFGVSLSLPQGSLGT	0	NaN	NaN	23.3981	NaN	NaN	NaN	NaN	NaN	NaN	0	NaN									2.7417	14	47.3	7.95899	7.04147	7.08668	6.96499	7.07631	6.89871	7.00238	6.96633	7.04068	6.92536	1	1	1	1	1	1	1	1	1	41.139
	TGVEG_442220	rhoptry protein ROP5	HMM: MATKLARLATWLVLVGCLLWRAGAV, NN: MATKLARLATWLVLVGCLLWRAGAV	0	NaN	NaN	NaN	21.3947	NaN	21.4751	NaN	NaN	NaN	0	NaN									4.0702	10	38.8	7.0619	6.28165	5.99648	5.82794	6.44708	5.7629	6.46988	5.34776	5.52363	6.02882	1	1	1	2	1	2	1	1	1	60.905

## Sheet: Toxo proteome
Protein IDs	Protein name	Signal Peptide	# TM Domains	LFQ intensity NMTi0_1	LFQ intensity NMTi0_2	LFQ intensity NMTi0_3	LFQ intensity NMTi005_1	LFQ intensity NMTi005_2	LFQ intensity NMTi005_3	LFQ intensity NMTi05_1	LFQ intensity NMTi05_2	LFQ intensity NMTi05_3	Substrates	t-test Significant	Log10 t-test p value *(-1)	Log2 FC YnMyr/NMTi	Score	MS/MS Count	Sequence coverage [%]	Total Intensity	Intensity NMTi0_1	Intensity NMTi0_2	Intensity NMTi0_3	Intensity NMTi005_1	Intensity NMTi005_2	Intensity NMTi005_3	Intensity NMTi05_1	Intensity NMTi05_2	Intensity NMTi05_3	Razor + unique peptides NMTi0_1	Razor + unique peptides NMTi0_2	Razor + unique peptides NMTi0_3	Razor + unique peptides NMTi005_1	Razor + unique peptides NMTi005_2	Razor + unique peptides NMTi005_3	Razor + unique peptides NMTi05_1	Razor + unique peptides NMTi05_2	Razor + unique peptides NMTi05_3	Mol. weight [kDa]
TGVEG_214575;TGME49_214575;TGGT1_214575	hypothetical protein	N/A	0	NaN	NaN	NaN	24.5368	NaN	24.3511	NaN	NaN	NaN	+		0	NaN	4.5216	9	25	8.04607	NaN	7.20825	7.14286	7.47576	NaN	7.41083	7.14004	NaN	7.06744	0	1	1	2	0	2	1	1	1	10.282
TGVEG_223940;TGGT1_223940;TGME49_223940	GAP45;GAP45 protein	N/A	0	29.2742	29.6081	29.5156	29.0492	28.8345	29.1385	28.5956	28.7164	29.0961	+		1.6702	0.663276	43.624	73	55.9	9.77656	8.89927	8.9374	8.91309	8.88082	8.93614	8.95241	8.58844	8.47387	8.47085	9	6	7	8	8	9	5	4	4	27.318
TGVEG_232280;TGME49_232280;TGGT1_232280	hypothetical protein	N/A	0	26.989	26.3953	26.3638	26.7391	26.0915	26.663	26.2806	26.5741	26.0354	+		0.485917	0.28603	12.995	27	20.7	8.97457	8.28459	7.92826	7.94722	8.19404	7.84423	8.19251	7.40773	8.11932	7.58047	3	5	3	4	3	3	3	3	2	30.148
TGME49_232340;TGVEG_232340;TGGT1_232340	protein phosphatase 2C domain-containing protein	N/A	0	25.8528	26.0928	26.0586	NaN	25.1083	NaN	25.8672	25.628	NaN	+		0.826052	0.253817	11.578	21	21.4	8.65143	7.44799	8.19273	7.60808	7.1651	7.63491	7.37378	7.98455	7.5831	6.87345	2	6	3	1	3	3	3	4	1	59.867
TGVEG_242070;TGME49_242070;TGGT1_242070	cAMP-dependent protein kinase regulatory subunit	N/A	0	28.0574	28.0272	27.7595	27.8648	27.5851	27.707	27.7912	27.2005	27.6099	+		0.976772	0.414183	26.756	58	27	9.41083	8.64243	8.37914	8.47972	8.60571	8.38304	8.46984	8.44613	8.39945	8.09684	8	7	8	8	7	8	7	6	5	42.796
TGGT1_243800;TGME49_243800;TGVEG_243800	long-chain fatty acid CoA ligase, putative;putative long-chain fatty acid CoA ligase	N/A	0	NaN	27.049	27.5944	27.5034	27.5649	27.6626	27.5057	NaN	27.6853	+		0.355688	-0.273849	32.89	26	21.1	9.24738	7.95925	7.87029	7.94993	8.59209	8.72687	8.08704	8.23937	7.96814	8.30224	2	3	2	6	4	4	3	2	4	83.507
TGVEG_246580;TGME49_246580;TGGT1_246580	hypothetical protein;putative transmembrane protein	HMM: MGECAILAICLVVFFAVLMSF, NN: MGECAILAICLVVFFAVLMSFDYRDGI	1	NaN	NaN	NaN	NaN	24.5005	NaN	NaN	NaN	NaN	+		0	NaN	6.9307	4	13.8	7.66696	NaN	NaN	NaN	NaN	7.5127	NaN	6.89501	6.78053	NaN	0	0	0	0	2	0	1	1	0	42.82
TGVEG_249970;TGME49_249970;TGGT1_249970	hypothetical protein	N/A	0	NaN	NaN	NaN	NaN	NaN	NaN	23.9668	NaN	NaN	+		0	NaN	2.6788	5	4.8	8.07522	NaN	7.42789	7.32693	7.38261	NaN	7.42693	7.30192	NaN	NaN	0	1	1	1	0	1	1	0	0	24.712
TGVEG_260820;TGME49_260820;TGGT1_260820	IMC sub-compartment protein ISP1	N/A	0	NaN	26.2748	NaN	NaN	NaN	NaN	NaN	NaN	NaN	+		0	NaN	12.655	4	30.1	8.4601	8.08447	7.95602	6.83027	NaN	7.84428	NaN	NaN	NaN	NaN	1	1	1	0	1	0	0	0	0	19.413
TGVEG_261440;TGME49_261440;TGGT1_261440	ARM repeats containing protein	N/A	0	NaN	NaN	NaN	NaN	25.1852	NaN	NaN	NaN	NaN	+		0	NaN	8.5535	6	9.5	8.23246	7.11504	7.03028	7.07199	7.18264	7.71884	7.38673	7.31088	7.12548	6.97736	1	1	1	1	2	1	1	1	1	30.509
TGVEG_261780;TGME49_261780;TGGT1_261780	microneme protein MIC7	N/A	1	NaN	NaN	NaN	NaN	NaN	23.9076	NaN	NaN	NaN	+		0	NaN	8.2841	6	14.7	7.81439	6.92181	NaN	6.90713	6.97457	7.00587	7.27743	NaN	7.0122	NaN	1	0	1	1	1	2	0	1	0	36.34
TGVEG_267080;TGME49_267080;TGGT1_267080	26S protease regulatory subunit 4, putative;putative 26S protease regulatory subunit 4	N/A	0	NaN	NaN	NaN	NaN	NaN	NaN	NaN	26.6594	NaN	+		0	NaN	6.3309	6	11.1	8.63787	NaN	NaN	7.9709	7.96155	7.98121	NaN	NaN	8.06123	7.58466	0	0	1	1	1	1	0	1	1	49.134
TGVEG_276140;TGGT1_276140;TGME49_276140	ADP ribosylation factor ARF1	N/A	0	NaN	NaN	26.7516	26.989	27.8779	26.4588	NaN	NaN	NaN	+		0	NaN	10.813	18	57.9	8.94291	7.50813	NaN	8.04626	8.21165	8.60285	7.83982	7.68466	7.55253	7.22045	1	0	2	3	5	2	1	1	1	21.062
TGVEG_290200;TGME49_290200;TGGT1_290200	NAD/NADP octopine/nopaline dehydrogenase, alpha-helical domain-containing protein	HMM: MGAPSPVAAGVAARTKSPLLTVCVCGGGNSAHAVAA, NN: MGAPSPVAAGVAARTKSPLLTV	0	28.428	28.5237	28.1469	28.4792	28.0289	28.3928	28.2705	28.3633	28.3629	+		0.104444	0.0339877	31.846	58	37.2	9.55392	8.37963	8.66431	8.34167	8.73393	8.70638	8.58292	8.64671	8.74065	8.36625	7	5	2	9	9	8	9	7	8	48.099
TGVEG_301440;TGME49_301440;TGGT1_301440	calcium-dependent protein kinase CDPK1	N/A	0	28.1253	28.1342	28.0493	28.0821	27.7092	27.9225	28.2924	28.2461	27.9033	+		0.129525	-0.0443033	57.385	83	34	9.45361	8.38636	8.56497	8.41061	8.46804	8.31014	8.59654	8.59983	8.64934	8.37447	9	11	12	8	8	11	8	8	8	65.421
TGVEG_305860;TGME49_305860;TGGT1_305860	calcium-dependent protein kinase CDPK3	N/A	0	NaN	NaN	25.8119	NaN	NaN	NaN	NaN	NaN	NaN	+		0	NaN	4.4652	8	14.7	8.28504	NaN	7.02535	7.80344	7.3912	7.78398	7.34741	NaN	7.03707	NaN	1	1	2	1	1	1	0	2	0	60.429
TGVEG_313380;TGME49_313380;TGGT1_313380	hypothetical protein	N/A	0	27.6378	27.7346	27.7766	27.7321	27.5914	27.3949	27.5423	27.2166	27.3456	+		1.55314	0.348132	36.599	48	46.4	9.30916	8.24559	8.3272	8.42297	8.64826	8.44621	8.34048	8.3175	8.0304	8.10113	5	5	7	6	6	6	5	3	5	31.512
TGVEG_316540;TGME49_316540;TGGT1_316540	IMC sub-compartment protein ISP3	N/A	0	NaN	NaN	NaN	NaN	NaN	NaN	NaN	NaN	27.6606	+		0	NaN	8.1646	13	28	9.34667	8.33796	8.20317	8.44143	8.41507	8.37533	8.23361	8.54736	8.43987	8.43335	1	1	1	2	1	1	1	1	2	18.39
TGVEG_285980;TGME49_285980;TGGT1_285980B;TGGT1_285980A	glucosephosphate-mutase GPM1	N/A	0	NaN	26.2861	NaN	NaN	NaN	NaN	NaN	NaN	NaN	+		0	NaN	16.086	9	22.3	8.25419	7.04123	7.95944	7.4277	6.90925	NaN	NaN	7.19584	7.42957	NaN	1	5	2	1	0	0	1	2	0	70.572
TGVEG_200250;TGGT1_200250;TGVEG_439620;TGVEG_200240;TGME49_200250;TGME49_200240;TGGT1_200240;TGGT1_200230;TGME49_200230;TGVEG_439610;TGVEG_200270;TGME49_200270;TGGT1_200270	microneme protein MIC17A;microneme protein MIC17B;microneme protein MIC17C;PAN domain protein;PAN/Apple domain-containing protein;putative microneme protein	HMM: MDALKTLLNKGITLAVVVAAVLLQIRAVALQ, NN: MDALKTLLNKGITLAVVVAAVLLQIRAV;HMM: MDALKTLLNKGITLAVVVAAVLLQIRAVALQ, NN: MDALKTLLNKGITLAVVVAAVLLQIRAVALQ;HMM: MDALKTVFNRRIALPVVVAAALLHNSAEAL, NN: MDALKTVFNRRIALPVVVAAALLHNSAEAL;HMM: MDTVTTLFNRKIALSFVVAAALLHNSAEAL, NN: MDTVTTLFNRKIALSFVVAAALLHNSAEAL;HMM: MDTVTTLFNRKIALSFVVVAALLHNSAEAL, NN: MDTVTTLFNRKIALSFVVVAALLHNSAEAL;HMM: METVTTLFNRKIALSFVVAAALLHNSAEAL, N…	0;1	26.1907	26.4019	26.1829	26.1507	25.7588	26.0527	26.1151	26.2911	26.4207			0.0515649	-0.0170924	18.905	28	25.1	8.87912	8.09086	7.993	7.83841	8.02979	7.62938	7.83991	7.88768	8.08575	7.68617	5	4	3	4	2	3	3	5	3	38.806
TGVEG_200320;TGME49_200320;TGGT1_200320	hypoxanthine-xanthine-guanine phosphoribosyl transferase HXGPRT	N/A	0	25.9442	26.2889	26.4224	26.4407	26.676	26.6502	26.6857	25.9321	NaN			0.094035	-0.0903301	11.257	24	20.4	8.93631	7.75526	7.73133	8.16959	8.06837	8.23411	7.99889	8.18698	7.64824	7.26724	3	2	4	4	3	3	3	2	1	31.485
TGVEG_200360;TGGT1_200360;TGME49_200360	hypothetical protein	HMM: MMLIALVCMLVHRLDLGAAV, NN: MMLIALVCMLVHRLDLGAAV	0	27.1042	27.3321	26.9427	27.4739	27.1355	27.3487	27.6486	26.7441	27.245			0.109426	-0.0862344	23.551	39	44.1	9.21442	7.97499	8.08055	7.95374	8.38908	8.10775	8.52701	8.48136	8.27024	8.12979	3	3	3	4	3	4	4	3	4	20.245
TGVEG_201140;TGGT1_201140;TGME49_201140;TGVEG_287480;TGGT1_287480;TGME49_287480	hypothetical protein;putative transmembrane protein	HMM: MTAPPVSVAPGAPSPPAPYFPASLVPATAASHLQAA, NN: MTAPPVSVAPGAPSPPAPYFPASLVPATAAS;N/A	0;4	27.0417	NaN	NaN	NaN	NaN	NaN	NaN	NaN	NaN			0	NaN	2.0131	4	2.1	8.54876	8.14035	7.74251	7.73784	8.02412	NaN	NaN	NaN	NaN	NaN	1	1	1	1	0	0	0	0	0	113.89
TGVEG_201390;TGGT1_201390;TGME49_201390;REV__TGGT1_273770;REV__TGVEG_273770;REV__TGME49_273770	hypothetical protein;putative transmembrane protein	HMM: MKTLHLLLFAVVAIALCGLATAS, NN: MKTLHLLLFAVVAIALCGLATAS	2	26.6972	NaN	26.4439	NaN	NaN	NaN	NaN	26.5076	NaN			0	0.0629787	7.4377	31	20.4	9.2211	8.25943	8.32803	8.26086	8.28001	8.28314	8.31622	8.2885	8.33137	7.94729	2	1	2	1	1	1	1	2	1	11.329
TGGT1_201680;TGVEG_201680;TGME49_201680	eukaryotic initiation factor-3 subunit 10, putative;putative eukaryotic initiation factor-3 subunit 10	N/A	0	28.6221	28.5413	28.492	28.4949	28.2526	28.531	28.5067	28.5647	28.6035			0.0469169	-0.00647291	68.796	123	33.5	9.58709	8.64563	8.73399	8.61954	8.7364	8.4308	8.65441	8.70718	8.58768	8.47926	15	18	15	19	10	13	16	9	14	118.85
TGVEG_201700;TGME49_201700;TGGT1_201700	WD domain, G-beta repeat-containing protein	N/A	0	NaN	25.1485	NaN	NaN	NaN	NaN	25.1131	NaN	NaN			0	0.0353413	12.611	7	9.5	8.13341	7.26352	7.62495	NaN	7.2462	NaN	NaN	7.63866	NaN	7.15546	2	2	0	1	0	0	2	0	1	67.411
TGVEG_201780;TGGT1_201780;TGME49_201780	microneme protein MIC2	HMM: MRLQREAVFGLMFACGMWMWPSEVAGG, NN: MRLQREAVFGLMFACGMWMWPSEVAGG	1	30.2377	30.3711	30.2761	30.155	29.8222	30.1725	29.9762	30.0054	30.0986			2.11096	0.26821	107.32	180	34.5	10.0763	9.20677	9.13069	9.20593	9.08746	9.11988	9.17615	9.11564	9.05706	8.93787	17	17	17	15	12	16	15	15	15	82.619
TGVEG_201800;TGME49_201800;TGGT1_201800	hypothetical protein;putative RNA-binding protein	HMM: MALNRVPSRVLPFAVSGVYVHPRNACRLPAAAAVSSVPSSVSAF, NN: MALNRVPSRVLPFAVSGVYVHPRNAC	0	NaN	NaN	NaN	NaN	NaN	NaN	NaN	NaN	25.326			0	NaN	4.6876	3	10.9	7.93217	NaN	NaN	NaN	7.09132	7.15339	7.08023	NaN	7.11866	7.52881	0	0	0	1	1	1	0	1	3	28.508
TGVEG_202370;TGGT1_202370;TGME49_202370	putative T-complex protein 1, epsilon subunit (TCP-1-epsilon);T-complex protein 1, epsilon subunit (TCP-1-epsilon), putative	N/A	0	26.9549	27.3188	26.8809	26.8991	27.0152	27.1133	27.0787	27.1772	26.8542			0.0301266	0.014829	38.571	39	29.9	9.14076	8.05956	8.03663	8.15682	8.28946	8.29778	8.12659	8.27147	8.15667	8.19989	5	6	5	7	4	3	4	3	4	58.631
TGVEG_202380;TGME49_202380;TGGT1_202380	putative rab GDI alpha;rab GDI alpha, putative	N/A	0	NaN	NaN	NaN	NaN	NaN	NaN	25.2386	NaN	NaN			0	NaN	8.4666	5	13.6	8.05534	6.98897	7.07067	NaN	NaN	7.64037	NaN	7.68474	NaN	NaN	1	1	0	0	1	0	2	0	0	51.021
TGVEG_202500;TGME49_202500;TGGT1_202500;TGVEG_202510;TGME49_202510;TGGT1_202510	GAPM1a;multi-pass transmembrane protein	N/A	6	NaN	26.027	26.3155	NaN	NaN	NaN	NaN	NaN	NaN			0	NaN	11.411	18	7.5	8.82744	7.84889	7.88267	7.95404	7.7593	7.81215	7.91064	8.08239	7.77352	7.70945	1	2	2	1	1	2	1	1	1	33.534
TGVEG_202530;TGME49_202530;TGGT1_202530	aspartate-tRNA ligase	N/A	1	25.3297	NaN	NaN	NaN	NaN	NaN	NaN	NaN	NaN			0	NaN	17.008	10	12.3	8.57514	7.625	7.27999	7.04864	NaN	7.80466	7.94215	7.99824	7.72138	NaN	3	1	1	0	2	3	2	2	0	86.762
TGGT1_202610	protein phosphatase 2C domain-containing protein	N/A	1	NaN	NaN	NaN	NaN	NaN	24.6787	NaN	NaN	NaN			0	NaN	4.4531	1	2.2	7.50958	NaN	NaN	NaN	NaN	NaN	7.50958	NaN	NaN	NaN	0	0	0	0	0	1	0	0	0	94.104
TGVEG_202680;TGGT1_202680;TGME49_202680	peptidase M16, alpha subunit, putative;putative peptidase M16, alpha subunit	HMM: MNASILFRRNAPGVSTCLRRRCLRPAALAAASASGVSTPASGV, NN: MNASILFRRNAPGVSTCLRRRCLRPAALA	0	27.773	28.0139	28.044	28.3474	27.9114	28.2518	28.0045	27.9744	28.2696			0.475049	-0.13921	38.278	55	22.2	9.48619	8.56165	8.58176	8.31664	8.65524	8.41441	8.70355	8.55951	8.48192	8.35549	6	7	5	5	5	7	8	6	5	62.161
TGVEG_202770;TGME49_202770;TGGT1_202770	RNA recognition motif-containing protein	N/A	0	NaN	NaN	NaN	NaN	25.1092	NaN	NaN	NaN	NaN			0	NaN	11.196	13	16.4	8.28411	7.64242	7.25837	7.1525	NaN	7.69596	7.08725	7.14485	NaN	7.6052	3	2	1	0	3	1	1	1	2	55.868
TGVEG_202820;TGME49_202820;TGGT1_202820	ubiquitin-conjugating enzyme subfamily protein	N/A	0	NaN	NaN	NaN	NaN	NaN	NaN	NaN	NaN	25.2789			0	NaN	2.5897	3	21.4	7.94552	7.21434	7.59245	NaN	NaN	NaN	NaN	NaN	NaN	7.51461	1	1	0	0	0	0	0	0	1	18.932
TGVEG_202830;TGME49_202830;TGGT1_202830	Elicitor-responsive protein, putative;putative Elicitor-responsive protein	HMM: MRRCLSFCRRETRWIKTHGISSIFVVSVHSA, NN: MRRCLSFCRRETRWIKTHGISSIFVVSVHSA;HMM: MRRCLSFCRRETRWIKTHGISSIFVVSVHSAVLTVVTLR, NN: MRRCLSFCRRETRWIKTHGISSIFVVSVHSA;HMM: MRRCLSFCRRETRWIKTHGISSIFVVSVQSAVLTVVTLR, NN: MRRCLSFCRRETRWIKTHGISSIFVVSVQSA	0;1	NaN	NaN	NaN	NaN	NaN	NaN	NaN	NaN	24.566			0	NaN	4.363	6	6.5	7.95315	7.22417	7.06081	NaN	NaN	6.98386	7.27453	NaN	7.1176	7.30003	1	1	0	0	1	1	0	1	2	33.057
TGGT1_202870;TGVEG_202870;TGME49_202870	SAP domain-containing protein	HMM: MLALLLSLSSVVWFFLFLVTSK, NN: MLALLLSLSSVVWFFLFLVTSK;N/A	1;2	NaN	25.3178	NaN	NaN	NaN	NaN	NaN	NaN	NaN			0	NaN	5.0795	5	9.1	8.00817	NaN	7.66795	NaN	7.09265	7.63321	NaN	NaN	NaN	NaN	0	2	0	1	1	0	0	0	1	42.345
TGGT1_203310;TGME49_203310;TGVEG_203310	dense granule protein GRA7	HMM: MARHAIFFALCVLGLVAAALPQFATAA, NN: MARHAIFFALCVLGLVAAALPQFATAA;HMM: MARHAIFSALCVLGLVAAALPQFATAA, NN: MARHAIFSALCVLGLVAAALPQFATAA	2	31.9925	32.105	31.9669	31.8868	31.4359	31.9412	31.7666	31.7179	32.0403			0.75956	0.179883	120.88	181	59.7	10.6058	9.58636	9.69168	9.59292	9.74002	9.61507	9.76145	9.69966	9.63924	9.46262	12	11	11	13	12	11	12	14	11	25.857
TGVEG_203450;TGME49_203450;TGGT1_203450	DUF3228 domain-containing protein	HMM: MAALWTTRVICFSCFFLLFVSLSAPTQGE, NN: MAALWTTRVICFSCFFLLFVSLSAPTQGE;HMM: MAALWTTRVICFSCFFLLLVSLSAPTQGE, NN: MAALWTTRVICFSCFFLLLVSLSAPTQGE	0	NaN	NaN	NaN	NaN	NaN	NaN	NaN	NaN	23.9397			0	NaN	6.6886	3	8.8	7.6824	NaN	NaN	NaN	NaN	NaN	NaN	7.43826	6.89042	7.11146	0	0	0	0	0	0	1	1	1	50.587
TGVEG_203490;TGGT1_203490;TGME49_203490	GNL3L/Grn1 GTPase	N/A	0	NaN	NaN	NaN	NaN	25.3229	NaN	NaN	NaN	NaN			0	NaN	2.97	2	2.4	7.76027	NaN	NaN	NaN	NaN	7.76027	NaN	NaN	NaN	NaN	0	0	0	0	1	1	0	0	0	76.191
TGVEG_203600;TGGT1_203600;TGME49_203600	hypothetical protein;putative transmembrane protein	HMM: MILSTERMNRPGCHRASRNGGRAFFFLLLVSLSYFFLWSQ, NN: MILSTERMNRPGCHRASRNGGRAFFFLLLVSLSYFFLWSQ	1	28.6967	28.9412	28.7051	NaN	28.7539	28.4763	28.49	28.2088	28.856			0.57388	0.262777	29.649	27	27.3	9.62195	8.79759	8.60033	8.61237	8.65835	8.73116	8.66056	8.81553	8.44334	8.56707	3	3	5	1	3	3	6	2	2	47.289
TGVEG_203630;TGME49_203630;TGGT1_203630	ribosomal protein RPL44	N/A	0	28.4133	28.3339	28.2196	28.325	29.6171	28.3632	28.2314	28.3912	28.7452			0.341651	-0.133675	13.876	34	30.5	9.62686	8.48776	8.57467	8.4178	8.60543	9.14727	8.61759	8.5528	8.60575	8.48928	3	5	4	5	5	5	4	5	3	12.062
TGVEG_203990;TGGT1_203990;TGME49_203990	rhoptry protein ROP12	HMM: MARVLPCVFLVAYLSCFLLAGELTHTTAL, NN: MARVLPCVFLVAYLSCFLLAG	1	24.7402	NaN	NaN	24.4602	NaN	NaN	24.4734	NaN	25.141			0	-0.0670471	7.7107	12	13.1	8.33078	7.42851	7.39116	7.37484	7.45805	NaN	7.48377	7.47176	7.31258	7.47264	2	1	1	2	0	1	2	1	2	25.444
TGVEG_204020;TGME49_204020;TGGT1_204020	ribosomal protein RPL8	N/A	0	29.9258	29.8437	29.6909	29.8713	30.9162	29.9242	29.9316	29.9448	29.9535			0.825769	-0.123168	60.96	108	56.5	10.1195	9.06793	9.0329	8.89318	9.02371	9.57862	9.15278	9.23132	9.13216	8.90852	9	9	7	7	9	7	7	8	6	28.254
TGGT1_204050;TGVEG_204050;TGME49_204050	subtilisin SUB1	HMM: MGSSHAIVACAALIVLLSTNARGL, NN: MGSSHAIVACAALIVLLSTNARGL	0	28.6182	28.9036	28.8241	28.6679	28.6665	28.7342	28.5798	28.795	28.6891			0.374065	0.0939833	63.08	109	34.6	9.64986	8.6062	8.6234	8.86541	8.65526	8.75429	8.72089	8.67164	8.75935	8.5023	12	11	17	11	12	13	12	12	10	85.096
TGVEG_204130;TGGT1_204130;TGME49_204130	perforin-like protein PLP1	N/A	0	NaN	NaN	NaN	25.7468	NaN	NaN	NaN	NaN	25.9754			0	NaN	10.603	13	4.9	8.42431	6.81633	7.32424	6.82191	7.81532	7.31211	7.15661	7.80817	7.0553	7.74423	1	2	1	2	1	2	2	1	2	125.47
TGVEG_204340;TGGT1_204340;TGME49_204340	hypothetical protein;putative transmembrane protein	HMM: MKPSSLRILLVAWTIISDAE, NN: MKPSSLRILLVAWTIISDAE	1	NaN	24.5284	NaN	24.4659	NaN	NaN	NaN	NaN	NaN			0	NaN	16.172	15	9.8	8.24859	6.72916	7.42354	7.69263	7.4613	NaN	6.93307	6.85958	7.36173	7.45278	1	3	4	2	1	1	1	1	2	97.297
TGVEG_204400;TGME49_204400;TGGT1_204400	ATPase synthase subunit alpha, putative;putative ATPase synthase subunit alpha	HMM: MTIHSCLARRAVSVAASGARAFAS, NN: MTIHSCLARRAVSVAASGARAFAS	0	28.569	28.4845	28.3606	28.4868	28.2884	28.4805	28.4923	28.3963	28.6226			0.133587	-0.0323594	39.335	86	35.2	9.58181	8.45036	8.64195	8.55105	8.80681	8.74635	8.65162	8.61782	8.61159	8.43302	10	9	11	10	9	7	8	10	10	62.076
TGVEG_204480;TGME49_204480;TGGT1_204480	thioredoxin domain-containing protein	N/A	0	NaN	NaN	NaN	NaN	25.7764	NaN	NaN	NaN	NaN			0	NaN	12.615	5	6.7	7.98116	6.83497	NaN	NaN	NaN	7.89679	7.00294	NaN	NaN	NaN	1	0	0	0	4	1	0	0	0	72.163
TGVEG_204530;TGME49_204530;TGGT1_204530	microneme protein MIC11	HMM: MQLKKLSVVSITLLGLFKFVNGV, NN: MQLKKLSVVSITLLGLFKFVNGV	0	30.1385	30.3069	30.3883	30.1737	29.7092	30.2826	30.0172	30.0144	30.308			0.604547	0.164717	54.288	141	43.6	10.0768	9.18079	9.21144	9.18991	9.1229	8.98985	9.17866	9.09614	9.07397	8.99847	10	11	12	9	10	10	11	11	10	22.432
TGVEG_205200;TGME49_205200;TGGT1_205200	hypothetical protein	N/A	0	NaN	NaN	NaN	24.7881	NaN	NaN	NaN	NaN	NaN			0	NaN	1.8365	1	1.2	7.55132	NaN	NaN	NaN	7.55132	NaN	NaN	NaN	NaN	NaN	0	0	0	1	0	0	0	0	0	138.68
TGGT1_205250;TGME49_205250	rhoptry protein ROP18	HMM: MFSVQRPPLTRTVVRMGLATLLPKTACLAGLNVALVFLLFQVQDGTGI, NN: MFSVQRPPLTRTVVRMGLATLLPKTACLAGLNVALVFLLFQVQDGTGI;HMM: MFSVQRPPLTRTVVRMGLATLLPKTACLAVLNVALVFLLFQVQDGTGI, NN: MFSVQRPPLTRTVVRMGLATLLPKTACLAVLNVALVFLLFQVQDGTGI	0;1	29.325	29.3624	29.2685	29.274	29.3699	29.2259	29.3071	29.2983	29.4482			0.229343	-0.0325991	88.418	92	32.1	9.89035	8.8856	8.86204	8.86174	8.9525	9.05774	8.82984	8.95562	9.12486	8.77442	8	11	6	9	7	6	9	7	8	62.342
TGVEG_205320;TGME49_205320;TGGT1_205320	hypothetical protein;putative serine-rich adhesin for platelets family protein	N/A	0	NaN	NaN	NaN	NaN	25.2109	NaN	NaN	NaN	NaN			0	NaN	13.33	6	12.8	8.42649	7.09864	NaN	7.4254	7.34046	7.72656	7.67468	7.72904	7.71404	NaN	1	0	1	1	2	1	1	1	0	70.808
TGVEG_205340;TGME49_205340;TGGT1_205340	ribosomal protein RPS12	N/A	0	29.8155	30.01	29.9038	29.9453	30.6137	29.603	29.5677	29.4035	29.5855			2.07647	0.390858	71.67	77	60.6	10.0127	8.85384	9.16492	8.91078	9.0732	9.34258	9.0335	9.13777	9.03945	8.57121	7	7	6	8	9	7	6	6	4	15.399
TGVEG_205380;TGME49_205380;TGGT1_205380	fructose-bisphospatase I	N/A	0	24.5438	NaN	NaN	NaN	NaN	25.1063	NaN	NaN	NaN			0	NaN	5.0482	10	7	8.24527	7.32617	6.99262	6.96553	7.27014	7.40286	7.67588	7.23078	7.05675	7.20167	2	1	1	1	2	2	1	1	1	42.245
TGVEG_205440;TGME49_205440;TGGT1_205440	CCT chaperonin gamma subunit	N/A	0	27.1517	27.2722	26.9425	26.9877	26.7394	27.0207	26.727	27.5363	26.6503			0.193368	0.150905	45.025	45	33.8	9.1427	8.17883	8.21548	8.0944	8.37722	8.24482	8.06588	8.0443	8.36006	7.89883	6	7	8	6	8	7	5	5	6	60.697
TGVEG_205470;TGGT1_205470;TGME49_205470	putative translation elongation factor 2 family protein;translation elongation factor 2 family protein, putative	N/A	0	32.5038	32.4829	32.3863	32.5208	32.1504	32.4601	32.4258	32.3315	32.2421			0.905205	0.124554	214.52	485	69.2	10.7695	9.77645	9.82832	9.73151	9.88129	9.84145	9.84906	9.89908	9.81785	9.66265	38	35	37	36	36	38	40	40	37	93.088
TGGT1_205510;TGME49_205510;TGVEG_205510	nucleolar protein 5, putative;putative nucleolar protein 5	N/A	0	NaN	26.5759	NaN	26.1497	26.4995	26.5776	NaN	NaN	NaN			0	NaN	23.306	19	23.5	8.75233	7.31946	8.16997	7.67731	7.99562	7.56933	8.19112	6.75152	7.31471	7.49649	2	4	1	4	2	3	1	2	2	54.334
TGVEG_205558;TGME49_205558;TGGT1_205558	NAC domain-containing protein	N/A	0	28.7889	28.8371	28.3852	28.4921	28.0721	28.4706	28.3777	28.1373	28.5616			0.759168	0.311553	44.358	68	51.3	9.57244	8.75245	8.56906	8.55818	8.79813	8.58733	8.55194	8.61423	8.49212	8.53818	6	7	6	7	5	5	6	4	5	20.507
TGVEG_205700;TGME49_205700;TGGT1_205700	cyclophilin precursor	N/A	1	29.2418	29.1463	29.0452	29.1537	29.0853	29.2566	29.1428	29.239	29.0471			0.00615972	0.00148964	22.013	91	24.7	9.81383	8.80726	8.87229	8.72403	8.80692	8.97136	9.01431	8.91655	8.85608	8.64673	7	7	6	7	7	8	7	7	8	38.193
TGVEG_205710;TGME49_205710;TGGT1_205710	lysine-tRNA ligase	HMM: MRSPCSGGKSLFEALSLVFCWRPRVWPR, NN: MRSPCSGGKSLFEALSLVFCWRPRVWPR	0	27.0091	27.4406	27.2949	27.1044	26.984	27.2831	27.0292	27.0239	27.0398			0.790966	0.217272	42.779	60	31.5	9.17365	8.27075	8.36455	8.2733	8.36339	8.05242	8.08365	8.1959	8.2858	7.85056	10	8	6	8	5	4	7	9	4	74.336
TGVEG_206320;TGME49_206320;TGGT1_206320	hypothetical protein;putative transmembrane protein	N/A	2	NaN	NaN	NaN	NaN	26.2049	25.7741	NaN	NaN	NaN			0	NaN	7.1165	7	14.6	8.48417	NaN	NaN	7.00711	NaN	8.02449	7.84107	7.75718	7.59778	7.35811	1	0	1	0	2	2	1	1	1	32.311
TGVEG_206470;TGME49_206470;TGGT1_206470	pyruvate dehydrogenase complex subunit PDH-E3II	N/A	0	NaN	27.6288	NaN	27.5656	NaN	26.8094	25.6942	27.3173	NaN			0	1.12307	23.926	18	17.3	8.95008	7.12493	8.38243	NaN	8.2039	7.09216	8.35017	7.52379	8.3032	6.79213	1	5	0	3	1	2	3	3	1	55.151
TGVEG_206480;TGME49_206480;TGGT1_206480	hypothetical protein	HMM: MAFSGLAAMASPPAATRAQ, NN: MAFSGLAAMASPPAATRAQLVSRRFLSGRLACPSAVSLTSGA	0	NaN	NaN	25.3891	NaN	NaN	25.6124	NaN	NaN	NaN			0	NaN	5.522	10	12.1	8.50989	7.10626	7.72331	7.707	7.7045	7.62053	7.76236	7.65073	NaN	7.07719	2	1	2	1	1	2	1	0	1	22.522
TGME49_206510;TGVEG_206510;TGGT1_206510	toxolysin TLN4	HMM: MRRPCLFRSTFLLLLALLPLFSLLSESI, NN: MRRPCLFRSTFLLLLALLPLFSLLSESI;N/A	0;1	NaN	NaN	22.1654	NaN	NaN	NaN	NaN	NaN	NaN			0	NaN	2.3613	3	1.1	7.47274	6.69437	7.07427	6.70576	NaN	NaN	NaN	NaN	6.89254	NaN	1	1	1	0	0	0	0	1	0	246.74
TGVEG_206610;TGME49_206610;TGGT1_206610	pyruvate dehydrogenase complex subunit PDH-E2	HMM: MALPSPGILVHVSLFLAAVSSAFGL, NN: MALPSPGILVHVSLFLAAVSSAFGL	0	NaN	NaN	NaN	NaN	NaN	23.2647	NaN	NaN	NaN			0	NaN	5.5782	2	2.9	7.55816	NaN	NaN	NaN	NaN	7.38061	7.08393	NaN	NaN	NaN	0	0	0	0	1	1	0	0	0	96.848
TGVEG_206690;TGGT1_206690;TGME49_206690	glideosome-associated protein with multiple-membrane spans GAPM2B	N/A	5	NaN	NaN	23.4743	NaN	NaN	NaN	NaN	NaN	NaN			0	NaN	3.3296	2	8	7.33351	NaN	NaN	7.09978	NaN	NaN	6.95278	NaN	NaN	NaN	0	0	1	0	0	1	0	0	0	46.788
TGVEG_207060;TGME49_207060;TGGT1_207060	ribonucleoside-diphosphate reductase small subunit	N/A	0	NaN	26.7993	25.9421	26.6703	26.3754	NaN	26.9535	26.8815	NaN			0.47949	-0.546763	14.474	17	21.2	8.97505	7.61779	8.4143	7.60531	8.1231	8.1687	8.00647	8.05545	7.94655	7.27955	1	4	2	3	3	1	2	2	2	44.585
TGVEG_207170;TGME49_207170;TGGT1_207170	hypothetical protein;putative transmembrane protein	N/A	1	NaN	NaN	NaN	NaN	NaN	NaN	NaN	NaN	24.5423			0	NaN	16.112	6	19.9	7.71692	NaN	6.97575	NaN	NaN	7.36218	NaN	NaN	NaN	7.2929	0	2	0	0	1	1	0	1	1	15.231
TGVEG_207440;TGME49_207440;TGGT1_207440	ribosomal protein RPS4	N/A	1	29.9621	30.0198	29.9168	30.1155	30.0006	30.0104	30.0831	29.9272	29.9464			0.122938	-0.0193157	40.016	167	51	10.0373	9.03806	9.13956	9.05162	9.18446	9.11066	9.12054	9.18941	8.90259	8.91175	15	15	14	14	13	12	15	10	14	35.507
TGGT1_207620;TGVEG_207620;TGME49_207620	pyridine nucleotide-disulfide oxidoreductase domain-containing protein	HMM: MASLRSQAWRRVAQRAFSHLSSSSPLFSSGLQGLPAAVSV, NN: MASLRSQAWRRVAQRAFSHLSSSS;HMM: MASLRSQAWRRVAQRAFSHLSSSSPLLSSGLQGL, NN: MASLRSQAWRRVAQRAFSHLSSSS	0	26.0548	NaN	25.7721	26.4146	25.722	26.114	26.3953	26.0748	26.0526			0.622979	-0.260808	25.857	36	21.4	8.81659	7.96946	7.05926	7.69506	8.05626	7.8481	7.85831	8.14863	7.65911	7.76639	6	1	4	5	5	4	6	3	5	71.248
TGVEG_207640;TGME49_207640;TGGT1_207640	isoleucyl-tRNA synthetase family protein	N/A	0	26.738	26.8178	26.6835	26.8742	27.4113	26.7929	27.1924	26.265	NaN			0.0164808	0.0177031	23.2	28	11.3	9.05755	7.48752	8.54249	8.38407	7.6771	7.90826	7.37845	8.52872	7.47564	NaN	3	6	3	3	3	2	4	3	1	141.53
TGGT1_207690	programmed cell death 5 protein	N/A	0	NaN	NaN	NaN	NaN	NaN	NaN	NaN	26.4368	NaN			0	NaN	7.1327	1	19.7	7.99424	NaN	NaN	NaN	NaN	NaN	NaN	NaN	7.99424	NaN	0	0	0	0	0	0	0	1	0	13.608
TGVEG_207770;TGME49_207770;TGGT1_207770	PCI domain-containing protein	N/A	0	NaN	NaN	NaN	NaN	NaN	NaN	22.4469	NaN	NaN			0	NaN	3.2997	2	2.2	7.14045	NaN	NaN	NaN	NaN	NaN	6.8344	6.84436	NaN	NaN	0	0	0	0	0	1	1	0	0	55.462
TGVEG_207840;TGME49_207840;TGGT1_207840	ribosomal protein RPS17	N/A	0	29.3902	29.6046	29.5268	29.4177	29.1359	29.4417	29.3459	29.5036	29.3173			0.623616	0.118286	74.135	83	68.2	9.85546	8.80166	8.90527	8.98044	8.95489	8.74324	8.92855	8.93602	8.99967	8.78545	9	7	7	8	5	7	6	8	7	15.228
TGVEG_208030;TGME49_208030;TGGT1_208030	microneme protein MIC4	HMM: MRASLPVHLVVCTQLSAVWFGVAKAH, NN: MRASLPVHLVVCTQLSAVWFGVAKAH	0	28.8354	28.966	29.0445	28.4365	28.9115	28.7808	28.4489	28.7835	28.7746			1.04382	0.279645	64.7	111	32.9	9.67239	8.69808	8.83322	8.84884	8.60525	8.8849	8.77456	8.57954	8.56687	8.48174	13	14	14	10	16	13	11	9	10	63.021
TGGT1_208530;TGVEG_208530;TGME49_208530	nicotinate phosphoribosyltransferase	N/A	0	NaN	26.7149	NaN	NaN	26.1534	NaN	NaN	NaN	NaN			0	NaN	11.985	6	11.4	8.53875	7.67736	7.81589	NaN	NaN	8.23767	7.05572	NaN	7.68576	NaN	1	2	0	0	5	1	0	1	0	65.563
TGVEG_208590;TGME49_208590;TGGT1_208590	putative vacuolar ATP synthase subunit 54kD;vacuolar ATP synthase subunit 54kD, putative	N/A	0	NaN	NaN	NaN	NaN	NaN	NaN	25.3391	NaN	NaN			0	NaN	5.8171	4	9.7	8.21024	NaN	NaN	NaN	7.02214	7.77836	NaN	7.715	NaN	7.60025	0	0	0	1	1	0	1	0	1	53.311
TGVEG_208790;TGME49_208790;TGGT1_208790	MC family transporter, putative;putative MC family transporter	HMM: MASSAATSLAPSSSAA, NN: MASSAATSLAPSSSAA	0	23.2328	NaN	NaN	23.5772	NaN	NaN	NaN	NaN	NaN			0	NaN	5.6195	11	13.5	7.85071	6.96133	7.04801	NaN	7.21072	6.93755	NaN	6.78184	7.18489	6.63645	2	1	0	2	2	0	1	2	1	33.687
TGGT1_208830;TGVEG_208830;TGME49_208830	hypothetical protein	HMM: MYRNHSGIRLACRLFEVGALVLALENVSGI, NN: MYRNHSGIRLACRLFEVGALVLAL	0	26.4634	26.6308	26.5659	26.6978	26.4946	26.8135	26.6946	26.5222	26.7334			0.524107	-0.0967223	35.045	50	28.9	9.02792	7.78601	8.0293	8.21048	8.24204	8.03056	8.21882	8.17263	7.92851	7.7402	5	7	8	8	4	7	5	5	4	54.896
TGGT1_208850	SAG-related sequence SRS11	HMM: MKTASLKFAALLGVAAFAPQFILCS, NN: MKTASLKFAALLGVAAFAPQFILCS	0	NaN	NaN	NaN	NaN	NaN	NaN	NaN	NaN	23.5022			0	NaN	3.9342	7	9.5	8.24761	7.3331	7.42802	7.28443	NaN	7.84655	7.1637	7.17365	NaN	6.97976	1	1	1	0	1	1	1	0	1	19.47
TGVEG_209030;TGME49_209030;TGGT1_209030	actin ACT1	N/A	0	32.7147	32.6241	32.4911	32.6129	32.1364	32.5588	32.5211	32.453	32.4471			0.920307	0.136218	187.3	349	76.1	10.7979	10.0395	10.0503	9.70593	9.91544	9.6978	9.75089	9.73121	9.89649	9.53245	23	23	22	22	24	22	23	24	23	41.907
TGGT1_209150;TGVEG_209150;TGME49_209150	non-proton pumping type-II NADH dehydrogenase I	HMM: MAGQWLRLLAGASVPMLSLPARCD, NN: MAGQWLRLLAGASVPMLSLPARCD	0	25.4328	NaN	NaN	NaN	NaN	NaN	NaN	NaN	NaN			0	NaN	2.7966	2	5.2	7.84263	7.65602	NaN	NaN	6.93252	NaN	7.19731	NaN	NaN	NaN	1	0	0	1	0	1	0	0	0	67.039
TGVEG_209160;TGME49_209160;TGGT1_209160	myristoyl CoA:protein N-myristoyltransferase	N/A	0	NaN	NaN	24.6153	24.3625	NaN	24.593	24.4428	NaN	NaN			0	0.172482	17.931	18	20.3	8.24202	7.24381	7.36233	7.2224	7.78801	7.07773	7.29101	7.22461	6.88537	NaN	2	2	2	4	1	2	3	2	1	52.376
TGGT1_209210;TGVEG_209210B;TGME49_209210	hypothetical protein;putative KH domain protein	HMM: MCACFSCASSLAYIHLLWRTRRDLSICRQFGASASQFLLVFLFPGTLAE, NN: MCACFSCASSLAYIHLLWRTRRDLSICRQFGASASQFLLVFLFPGTLAE;N/A	0	NaN	NaN	NaN	NaN	NaN	27.275	NaN	NaN	NaN			0	NaN	1.8013	3	1.7	8.58049	NaN	7.46768	6.77876	8.1754	NaN	8.29112	NaN	NaN	NaN	0	1	1	1	0	1	0	0	0	166.89
TGVEG_209260;TGME49_209260;TGGT1_209260	cytochrome c oxidase subunit, putative;putative cytochrome c oxidase subunit	HMM: MAAARLSQVFAPGAAPRHFFSKTFSAVSGKNISSFSQLAARSSACTLASLSSPLCSSGL, NN: MAAARLSQVFAPGAAPR;HMM: MAAARLSQVFAPGAAPRHLFSKSFSAVSGKNISSFSQLAARSSACTLASLSSPLCSSGL, NN: MAAARLSQVFAPGAAPR	0	NaN	NaN	NaN	NaN	NaN	NaN	NaN	24.2251	NaN			0	NaN	5.6209	2	15.8	7.96272	7.15204	NaN	NaN	NaN	NaN	NaN	7.75035	7.32844	NaN	1	0	0	0	0	0	1	1	0	34.706
TGVEG_209290;TGME49_209290;TGGT1_209290	ribosomal protein RPS28	HMM: MPFGALFPVSSRFSHTFAPRICVFSFLSHSPSSRLVWGC, NN: MPFGALFPVSSRFSHTFAP	0	29.6392	29.711	29.6578	29.9331	30.4715	29.3559	30.2789	29.7411	29.5556			0.362192	-0.189205	18.641	45	30.5	10.1641	8.8758	9.07033	9.20556	9.37918	9.43241	9.24057	9.24748	9.21603	8.9067	3	4	4	2	4	3	3	3	4	13.214
TGME49_209420;TGGT1_209420;TGVEG_209420	hypothetical protein	N/A	0	NaN	NaN	NaN	23.9082	NaN	NaN	NaN	NaN	NaN			0	NaN	4.4343	5	7.6	7.80579	7.17609	7.091	6.98955	7.28643	NaN	6.87563	NaN	NaN	NaN	1	1	1	1	0	2	0	0	0	26.853
TGVEG_209600;TGME49_209600;TGGT1_209600	hypothetical protein	N/A	0	27.8661	27.9791	27.8046	27.9899	27.8836	28.1326	28.3338	28.1609	28.1375			1.82099	-0.327426	37.185	81	27.3	9.47729	8.37869	8.46696	8.29126	8.62978	8.61367	8.61229	8.68465	8.59798	8.16634	8	7	6	8	9	8	8	7	7	50.2
TGVEG_209880;TGGT1_209880;TGME49_209880	glutamic acid-rcih protein, putative;putative glutamic acid-rcih protein	N/A	0	NaN	NaN	NaN	NaN	NaN	NaN	25.8853	26.0531	NaN			0	NaN	2.1117	8	0.4	8.47579	7.35216	7.71261	NaN	NaN	NaN	7.75478	7.88696	7.87191	7.2199	1	1	0	0	0	1	2	2	1	477.99
TGVEG_209910;TGME49_209910;TGGT1_209910	histone H2Bv	N/A	0	27.7598	27.1746	27.963	NaN	27.9578	27.8092	27.5117	27.9274	NaN			0.0886221	-0.0871563	14	28	43.1	9.31896	8.42382	8.21532	8.42854	8.17803	8.67214	8.43095	8.28771	8.32856	7.94924	3	2	3	1	4	2	3	2	1	13.732
TGGT1_209950;TGVEG_209950;TGME49_209950	putative thioredoxin;thioredoxin, putative	HMM: MAPLRVCAFLPLVCFAFLSLAAGA, NN: MAPLRVCAFLPLVCFAFLSLAAGA	0	30.1968	30.1278	30.1236	30.2318	30.1612	30.3536	30.4012	30.2502	30.1321			0.616593	-0.111762	64.613	169	60.8	10.1124	9.1731	8.98133	9.07602	9.32726	9.23371	9.28702	9.18113	9.12629	8.83594	19	19	17	18	20	18	18	16	15	47.686
TGVEG_210370;TGME49_210370;TGGT1_210370	hypothetical protein;putative RNA helicase-1	HMM: MATVPMVSLSAARFTLSFLFFQLCLSR, NN: MATVPMVSLSAARFTLSFLFFQLCLSR	0	NaN	23.0705	NaN	NaN	NaN	NaN	NaN	NaN	NaN			0	NaN	3.1581	2	6.9	7.58115	NaN	6.99146	NaN	6.84267	NaN	NaN	NaN	NaN	7.32946	0	1	0	1	0	0	0	0	1	52.432
TGVEG_210408;TGME49_210408;TGGT1_210408	HMG (high mobility group) box domain-containing protein	N/A	0	28.4739	28.5306	28.4955	28.4125	29.3059	28.3786	28.4367	28.5971	28.5833			0.293603	-0.0390733	6.8653	34	36.2	9.62472	8.48232	8.54851	8.64375	8.63858	9.0154	8.65679	8.55221	8.70996	8.50841	2	2	4	3	4	4	2	4	4	10.682
TGVEG_210690;TGME49_210690;TGGT1_210690	ribosomal protein RPS6	N/A	0	30.6302	30.5158	30.5749	30.6803	31.7247	30.6088	30.3934	30.5212	30.6418			0.279312	0.0548344	78.52	165	54.7	10.2863	9.03794	9.27996	9.26586	9.3461	9.79156	9.12146	9.29533	9.27231	8.96181	12	13	15	15	18	12	13	14	12	28.956
TGVEG_210840;TGME49_210840;TGGT1_210840	arginyl-tRNA synthetase family protein	N/A	0	NaN	NaN	NaN	24.8017	NaN	NaN	NaN	NaN	NaN			0	NaN	8.2247	10	8.2	8.15152	7.05154	6.93861	7.01837	7.55541	7.38963	7.35591	6.72755	7.08504	7.03068	1	1	1	3	2	2	1	1	1	67.009
TGGT1_211020;TGVEG_211020;TGME49_211020	RNA recognition motif-containing protein	N/A	0	NaN	NaN	NaN	NaN	26.4191	NaN	25.2309	NaN	25.3373			0	NaN	7.3244	7	18.7	8.42589	7.24642	NaN	NaN	NaN	8.154	7.287	7.63272	7.25653	7.41637	1	0	0	0	3	1	2	1	2	28.764
TGVEG_211030;TGME49_211030;TGGT1_211030	hypothetical protein	N/A	0	27.7498	27.8027	27.5763	27.8649	27.4615	27.8979	27.595	27.5191	27.8085			0.246397	0.0687574	34.193	59	56	9.34234	8.45926	8.40538	8.43659	8.55841	8.20265	8.56413	8.37243	8.00191	8.20464	8	6	8	7	6	7	7	3	6	22.215
TGVEG_211040;TGME49_211040;TGGT1_211040	Sec61beta family protein	N/A	1	27.7123	27.6248	27.6355	27.5091	27.17	27.6115	27.4631	27.5541	27.743			0.336556	0.0708396	29.778	34	56.6	9.29815	8.33694	8.37225	8.33045	8.43119	8.28499	8.43051	8.34537	8.26148	8.26409	4	4	4	5	4	5	4	3	4	10.103
TGME49_211260;TGGT1_211260;TGVEG_211260	rhoptry kinase family protein ROP26 (incomplete catalytic triad)	N/A	0	NaN	22.3632	NaN	NaN	NaN	NaN	NaN	NaN	NaN			0	NaN	2.8493	1	5.3	6.77853	NaN	6.77853	NaN	NaN	NaN	NaN	NaN	NaN	NaN	0	1	0	0	0	0	1	0	0	47.826
TGGT1_211290	rhoptry protein ROP15	HMM: MLKTTPAFFLFLTWMFPRCDGF, NN: MLKTTPAFFLFLTWMFPRCDGF	0	26.6498	26.663	26.4214	26.6115	26.7783	NaN	27.1857	27.075	26.6457			1.00494	-0.390721	18.543	25	23.7	9.01536	7.98073	7.509	7.9666	8.19198	7.87569	NaN	8.51131	8.28988	7.81487	3	2	4	4	3	1	3	2	2	36.589
TGME49_211420;TGVEG_211420;TGGT1_211420	RNA recognition motif-containing protein	N/A	0	27.8358	26.9931	27.6123	27.5178	28.8308	27.2564	27.5818	27.7523	27.7794			0.360008	-0.224111	15.075	31	33.3	9.41439	8.06599	8.14305	8.28773	8.09103	8.96155	8.40611	8.48213	8.44097	8.43815	2	3	3	2	4	3	3	3	3	20.398
TGVEG_211680;TGME49_211680;TGGT1_211680	protein disulfide isomerase	HMM: MRAGFSFALLAVGLLATAVVYSA, NN: MRAGFSFALLAVGLLATAVVYSAAE	0	32.0815	32.1679	32.066	32.1151	31.7266	32.2609	31.9988	31.8772	32.1315			0.570472	0.102635	154.98	418	69.9	10.6804	9.63728	9.75173	9.59149	9.81518	9.76241	9.85762	9.73843	9.67276	9.63433	31	31	29	29	26	31	31	27	28	52.801
TGVEG_211710;TGME49_211710;TGGT1_211710	TB2/DP1, HVA22 family protein	HMM: MISLLGNFLGSLLVLGVSFVYPA, NN: MISLLGNFLGSLLVLGVSFVYPA	3	NaN	NaN	NaN	NaN	NaN	NaN	NaN	25.6553	NaN			0	NaN	4.5054	2	19	7.75897	NaN	NaN	NaN	NaN	NaN	NaN	NaN	7.75897	NaN	0	0	0	0	0	0	0	2	0	19.036
TGVEG_212250;TGME49_212250;TGGT1_212250	XPG N-terminal domain-containing protein	N/A	0	24.4174	NaN	NaN	NaN	NaN	NaN	NaN	NaN	NaN			0	NaN	2.3805	4	5	7.60984	7.35036	NaN	7.0117	NaN	NaN	6.90546	NaN	NaN	NaN	2	0	1	0	0	1	0	0	0	47.716
TGVEG_212260;TGME49_212260;TGGT1_212260	Sjogren's syndrome/scleroderma autoantigen 1 (Autoantigen p27) protein	N/A	0	NaN	NaN	NaN	NaN	23.7762	NaN	NaN	NaN	NaN			0	NaN	4.4218	1	16.5	7.81159	NaN	NaN	7.50744	NaN	7.29469	NaN	NaN	7.1114	NaN	0	0	1	0	2	0	0	1	0	37.985
TGVEG_212290;TGME49_212290;TGGT1_212290	ribosomal protein RPS19	N/A	0	29.9114	30.1392	29.7778	30.0888	31.3478	29.9045	30.02	29.9407	29.9265			0.0621375	-0.0195821	38.182	87	28.8	10.1131	9.1384	9.20596	8.89714	9.2655	9.52211	9.11374	8.99537	8.88753	8.98827	6	6	6	6	8	9	6	7	7	34.968
TGVEG_212300;TGME49_212300;TGGT1_212300	hypothetical protein;putative transmembrane protein	HMM: MSAQGQQGVRSTVAAGKNRFWQPAPITVLLVLSSSFLFAFAA, NN: MSAQGQQGVRSTVAAGKNRFWQPAPITVLLVLSSSFLFAFAA	1	NaN	NaN	NaN	NaN	NaN	25.4507	NaN	NaN	NaN			0	NaN	7.3926	6	11.1	8.14092	6.89498	6.97039	NaN	7.12333	7.28874	7.74197	7.35984	7.01305	NaN	2	1	0	1	2	2	2	2	0	75.676
TGGT1_213030;TGVEG_213030;TGME49_213030	clathrin light chain;hypothetical protein	N/A	0	NaN	25.1681	NaN	NaN	NaN	NaN	NaN	NaN	NaN			0	NaN	7.7917	6	9.9	8.04571	NaN	7.62287	7.59854	NaN	NaN	7.20812	NaN	7.12424	NaN	0	2	1	0	0	1	0	1	0	35.227
TGVEG_213050;TGME49_213050;TGGT1_213050	hypothetical protein	N/A	0	NaN	NaN	NaN	NaN	NaN	NaN	23.7132	NaN	NaN			0	NaN	7.8783	4	13	7.85977	7.03551	7.12512	NaN	7.21397	7.17719	NaN	7.22557	NaN	NaN	1	1	0	1	1	0	1	0	0	21.263
TGVEG_213280;TGME49_213280;TGGT1_213280	SAG-related sequence SRS25	HMM: MRTSRLLCAFGAVLLCWVPSWTAHAE, NN: MRTSRLLCAFGAVLLCWVPSWTAH	0	26.5009	26.4585	26.6299	26.4477	28.29	26.62	26.367	26.7229	26.7641			0.25766	-0.0881971	19.692	24	25.1	9.12392	7.89967	8.02572	8.06908	7.96819	8.70059	8.12736	8.06326	8.01229	7.9036	2	3	3	2	3	3	3	2	2	20.782
TGVEG_213350;TGME49_213350;TGGT1_213350	ribosomal protein RPS15	N/A	0	30.3797	30.5759	30.4943	30.7285	30.5132	30.5237	30.6136	30.4743	30.6687			0.558954	-0.102264	24.934	79	34	10.2989	9.1084	9.25152	9.32911	9.49276	9.45283	9.20134	9.41992	9.50908	9.11528	4	3	4	3	3	4	4	5	4	17.157
TGVEG_213410;TGME49_213410;TGGT1_213410	putative small nuclear ribonucleoprotein f (snrnp-f);small nuclear ribonucleoprotein f (snrnp-f), putative	N/A	0	24.9502	26.0427	NaN	26.2897	26.7407	NaN	26.4057	25.681	25.9925			0.446245	-0.529955	8.7658	16	40.2	8.80684	7.65608	7.85861	7.5552	8.00441	8.14644	7.39217	8.05423	7.72111	7.74698	3	2	2	2	3	1	2	2	3	10.069
TGGT1_213900;TGME49_213900;TGVEG_213900	regulator of chromosome condensation RCC1	N/A	0	NaN	NaN	NaN	NaN	26.3413	NaN	NaN	NaN	NaN			0	NaN	4.0826	1	3.9	8.06685	NaN	NaN	NaN	NaN	8.06685	NaN	NaN	NaN	NaN	0	0	0	0	2	0	0	0	0	122.54
TGVEG_213940;TGGT1_213940;TGME49_213940	CHCH domain-containing protein	N/A	0	NaN	NaN	24.9735	NaN	NaN	NaN	NaN	NaN	NaN			0	NaN	6.3697	7	30.9	8.06573	NaN	7.39271	7.55107	7.26354	NaN	7.02967	7.01536	7.22157	NaN	0	1	2	1	0	1	1	1	0	14.927
TGGT1_214080;TGME49_214080;TGVEG_214080;TGVEG_266120;TGME49_266120;TGGT1_266120	thioredoxin-dependent peroxidase TPX1/2;toxofilin	HMM: MAQYKSRPLAAFLLLITVGSLLTASESV, NN: MAQYKSRPLAAFLLLITVGSLLTA;HMM: MAQYKSRPLAAVLLLITVGSLLTASESV, NN: MAQYKSRPLAAVLLLITVGSLLTA;HMM: MLPLCASSQMYLGQECLSCPVLPRLCLATCLGA, NN: MLPLCASSQMYLGQECLSCPVLPRLCLAT	0;1	30.2458	30.2429	30.1756	30.0316	29.6278	30.113	29.9527	30.0729	30.3119			0.431271	0.10891	85.071	114	63.7	10.0576	9.20025	9.09255	9.01339	9.22812	9.10656	9.06811	9.03603	9.05526	9.07972	13	11	10	11	12	11	10	12	13	27.131
TGVEG_214210;TGME49_214210;TGGT1_214210	rRNA pseudouridine synthase	N/A	0	25.439	26.8165	26.286	27.1452	28.5441	26.1818	26.0017	26.8533	NaN			0.147799	-0.246994	35.049	32	28.7	9.13912	7.2193	7.93526	8.11106	7.91883	8.89457	7.58899	8.16489	7.94894	6.64552	2	4	3	3	10	3	5	2	1	56.744
TGVEG_214270;TGME49_214270;TGGT1_214270	putative translation initiation factor IF-2;translation initiation factor IF-2, putative	N/A	0	NaN	NaN	NaN	NaN	NaN	NaN	NaN	NaN	23.8439			0	NaN	2.3907	1	2.5	7.32123	NaN	6.94727	NaN	NaN	NaN	NaN	NaN	NaN	7.08264	0	1	0	0	0	0	0	0	1	125.65
TGVEG_214290;TGME49_214290;TGGT1_214290	DJ-1 family protein	HMM: MSPLGFGAFLSPLLLFCVSPHLRTGV, NN: MSPLGFGAFLSPLLLFCVSPHLRTG	0	26.8151	27.2804	27.8062	27.8745	27.96	27.672	27.9441	27.8254	27.8236			0.910546	-0.56382	24.065	27	38.7	9.40214	8.16373	8.38566	8.71281	8.42197	8.43335	8.31605	8.64468	8.47986	8.12597	5	3	4	4	3	3	2	3	3	27.904
TGVEG_214320;TGME49_214320;TGGT1_214320	facilitative glucose transporter GT1	N/A	12	NaN	NaN	NaN	NaN	NaN	NaN	NaN	25.7223	NaN			0	NaN	4.7575	6	3.5	8.39343	NaN	NaN	7.22953	7.74947	7.53914	NaN	7.79504	7.77913	7.23469	0	0	1	2	1	0	2	2	1	61.687
TGVEG_214350;TGME49_214350;TGGT1_214350	GTP-binding protein, putative;putative GTP-binding protein	N/A	0	25.983	26.5329	26.9397	27.0214	27.1688	27.3514	27.9072	27.1576	26.7789			0.856204	-0.796057	26.506	28	44.2	9.16782	7.53131	7.92033	8.21155	8.61614	8.16328	8.01444	8.54899	7.95114	7.93546	2	3	3	5	3	4	5	5	3	44.547
TGVEG_214440;TGME49_214440;TGGT1_214440	4'-phosphopantetheinyl transferase superfamily protein	N/A	0	NaN	NaN	NaN	NaN	NaN	NaN	24.215	NaN	NaN			0	NaN	6.5106	2	9.8	7.84457	6.92469	7.06479	NaN	7.13046	NaN	NaN	7.37661	7.10009	NaN	1	1	0	1	0	0	1	1	0	48.49
TGVEG_214490;TGME49_214490;TGGT1_214490	peptidase M16 inactive domain-containing protein	N/A	0	NaN	NaN	NaN	NaN	NaN	NaN	21.4174	NaN	NaN			0	NaN	2.5976	2	0.7	6.53444	NaN	NaN	NaN	NaN	NaN	NaN	6.53444	NaN	NaN	0	0	0	1	0	0	1	0	0	148.86
TGVEG_214770;TGME49_214770;TGGT1_214770	putative small GTP binding protein rab1a;small GTP binding protein rab1a, putative	N/A	0	NaN	NaN	25.9971	NaN	25.3706	25.6425	NaN	25.703	26.126			0	0.0826054	28.246	18	40.1	8.66608	7.38778	7.52058	7.83807	7.68336	7.82836	7.77685	7.63916	7.76778	7.77461	2	3	2	1	2	2	1	2	2	22.231
TGVEG_214790;TGME49_214790;TGGT1_214790	glycoprotein	N/A	0	28.9123	29.1446	28.9729	28.6982	28.2991	28.8006	28.6192	28.623	28.6448			2.25624	0.380985	27.992	86	30.4	9.66612	8.74356	8.80355	8.74998	8.83065	8.56121	8.79381	8.74013	8.65094	8.34776	8	8	7	8	6	8	7	8	6	31.444
TGVEG_214930;TGME49_214930;TGGT1_214930	hypothetical protein	N/A	0	NaN	NaN	NaN	24.1151	NaN	NaN	NaN	NaN	NaN			0	NaN	3.4248	4	13	7.85891	7.22835	7.273	7.15455	7.34869	NaN	NaN	NaN	NaN	NaN	1	1	1	1	0	0	0	0	0	15.147
TGVEG_214940;TGME49_214940;TGGT1_214940	MIC2-associated protein M2AP	HMM: MKLAAVSSAAFAAAFFPAVVNAR, NN: MKLAAVSSAAFAAAFFPAVVNAR;HMM: MKLAAVSSAAFAAAFFPAVVSAR, NN: MKLAAVSSAAFAAAFFPAVVSAR	0	29.1414	29.1183	29.0758	28.2258	27.8953	28.5936	28.2036	28.4323	28.1317			3.11763	0.855956	50.969	66	42.1	9.6629	8.82558	8.94137	8.85559	8.63232	8.51947	8.8276	8.57763	8.59938	8.12652	7	8	6	6	6	7	5	5	4	34.556
TGVEG_214950;TGME49_214950;TGGT1_214950	hypothetical protein	N/A	0	NaN	NaN	NaN	NaN	NaN	NaN	NaN	NaN	25.2931			0	NaN	2.7602	7	8.2	8.31559	7.42815	7.30552	NaN	7.49184	NaN	7.54839	7.52451	7.4303	7.5189	1	1	0	1	0	1	1	1	1	21.501
TGVEG_214970;TGME49_214970;TGGT1_214970	DNA replication licensing factor, putative;putative DNA replication licensing factor	N/A	0	NaN	NaN	NaN	NaN	22.3565	NaN	NaN	NaN	NaN			0	NaN	4.6457	6	1.8	7.54305	NaN	6.99838	NaN	7.24522	6.86733	NaN	NaN	NaN	NaN	1	1	0	1	1	0	1	0	1	117.27
TGVEG_215060;TGME49_215060;TGGT1_215060	putative small GTP-binding protein sar1;small GTP-binding protein sar1, putative	N/A	0	NaN	NaN	NaN	25.58	25.9394	25.9333	25.5502	26.2383	NaN			0	NaN	7.3715	21	21.4	8.63595	7.23512	7.19573	7.17029	7.81382	7.95865	7.85935	7.79506	7.91935	7.03965	1	1	1	2	2	2	2	2	1	22.138
TGVEG_215260;TGME49_215260;TGGT1_215260	carbamoylphosphate synthetase	N/A	0	NaN	NaN	NaN	NaN	NaN	25.3242	26.0482	NaN	25.4124			0	NaN	6.7528	10	3.6	8.25368	7.0929	6.65506	NaN	6.92199	7.03886	7.36318	7.4691	NaN	7.95719	1	1	0	1	1	3	2	0	3	187.1
TGVEG_215280;TGME49_215280;TGGT1_215280	succinate dehydrogenase [ubiquinone] iron-sulfur protein	HMM: MLSSALRSVRPAASAASRRFASVAHAQTAASEAEAA, NN: MLSSALRSVRPAASAA	0	NaN	NaN	NaN	NaN	NaN	25.6565	NaN	NaN	NaN			0	NaN	4.666	7	13.2	8.0983	6.77234	6.77372	NaN	NaN	NaN	7.80391	NaN	7.69791	NaN	1	1	0	0	0	2	1	2	0	38.61
TGVEG_215430;TGME49_215430;TGGT1_215430	hypothetical protein	HMM: MQLTWKQILLIAGGTAAAGA, NN: MQLTWKQILLIAGGTAAA	0	25.2936	25.229	NaN	NaN	NaN	25.5973	NaN	NaN	NaN			0	NaN	16.518	19	25.8	8.92985	7.62908	7.63738	NaN	8.10544	8.24247	7.77662	8.16116	8.33197	7.63492	2	2	0	2	4	2	3	3	3	27.554
TGVEG_215460;TGME49_215460;TGGT1_215460	ribosomal protein RPS24	N/A	0	29.3426	29.3206	29.3936	29.4162	30.2838	29.298	29.3171	29.4135	29.5008			0.435158	-0.0581894	17.076	81	22.1	9.90289	8.86115	8.88617	8.82042	8.96989	9.31733	8.91367	8.9433	8.78004	8.72416	6	6	5	6	7	6	6	6	5	30.375
TGVEG_215470;TGME49_215470;TGGT1_215470	ribosomal protein RPL10A	N/A	0	30.3573	30.2516	30.3662	30.4858	31.1745	30.2947	30.3139	30.2778	30.2857			0.352614	0.0325871	43.834	149	51.6	10.2255	9.14591	9.19418	9.19156	9.26274	9.64757	9.20235	9.33804	9.09219	9.00355	10	11	10	9	14	10	11	8	11	24.603
TGVEG_215590;TGME49_215590;TGGT1_215590	flavoprotein subunit of succinate dehydrogenase	HMM: MHASASLTQALRPYARRPLSSALSRSSLSPALAAGVARGLNAA, NN: MHASASLTQALRPYARRPLSSALSRSSLSPALAA	0	NaN	NaN	NaN	25.5696	NaN	NaN	NaN	25.6228	26.0067			0	NaN	13.817	12	12.6	8.55235	7.13466	7.34068	7.29387	7.86625	7.79525	7.59104	7.44484	7.63154	7.74789	1	1	1	3	3	2	2	2	2	72.733
TGVEG_215610;TGGT1_215610;TGME49_215610	hypothetical protein	N/A	0	NaN	NaN	NaN	NaN	NaN	NaN	NaN	23.2707	NaN			0	NaN	4.4016	2	21.6	7.04116	NaN	NaN	NaN	NaN	NaN	NaN	NaN	7.04116	NaN	1	0	0	0	0	0	0	1	0	13.014
TGVEG_215775;TGGT1_215775	rhoptry protein ROP8	HMM: MFSVLRNRNMRHGPSIGSSSCLIWLAAAFFVSALGH, NN: MFSVLRNRNMRHGPSIGSSSCLIWLAAAFFVSALGH	1	NaN	22.4085	NaN	NaN	NaN	NaN	NaN	NaN	NaN			0	NaN	1.8975	1	10.4	6.95887	6.46232	6.79217	NaN	NaN	NaN	NaN	NaN	NaN	NaN	1	1	0	0	0	0	0	0	0	65.402
TGVEG_215980;TGME49_215980;TGGT1_215980	hypothetical protein;putative transmembrane protein	N/A	1	29.8946	29.9878	30.0554	29.94	30.7436	29.8437	29.8619	29.4379	29.9524			0.621662	0.228556	31.352	95	45.7	10.0452	9.11621	9.01824	9.10775	9.07485	9.36197	9.02449	9.13162	8.7737	8.98745	8	7	7	7	7	6	6	6	7	24.466
TGVEG_216000;TGME49_216000;TGGT1_216000	alveolin domain containing intermediate filament IMC3	N/A	0	27.8292	27.4797	28.0508	27.8732	27.693	27.3745	27.5778	27.9942	26.8219			0.350642	0.321911	29.242	36	20.8	9.34994	8.34305	8.1328	8.4522	8.54317	8.56471	8.24647	8.4695	8.51648	7.91968	5	3	4	5	4	4	4	4	2	57.999
TGVEG_216260;TGME49_216260;TGGT1_216260	eukaryotic initiation factor-2B, gamma subunit, putative;putative eukaryotic initiation factor-2B, gamma subunit	N/A	0	NaN	NaN	NaN	NaN	NaN	NaN	NaN	NaN	23.1267			0	NaN	4.2466	6	6.3	7.85478	6.91831	6.7943	NaN	7.31578	7.00595	7.04528	6.89093	NaN	6.86674	1	1	0	1	1	1	1	0	1	58.016
TGVEG_216450;TGME49_216450;TGGT1_216450	peptidase, T1 family protein	N/A	0	NaN	NaN	25.3969	25.3639	NaN	NaN	25.4749	NaN	NaN			0	-0.0780506	5.6761	6	10.8	8.44014	NaN	7.29839	7.54992	7.77497	7.25926	NaN	7.8086	7.70731	7.43292	0	1	2	3	1	0	3	2	2	27.939
TGGT1_216650;TGVEG_216650;TGME49_216650	S15 sporozoite-expressed protein	N/A	0	27.224	27.1892	27.0549	27.3431	26.9834	27.1093	27.1892	27.4829	27.2112			0.572404	-0.138411	18.409	40	24	9.18924	8.09541	8.30758	7.84566	8.40435	8.0404	8.33682	8.14161	8.46036	8.14792	5	4	5	5	4	5	5	7	5	45.118
TGGT1_216670;TGVEG_216670;TGME49_216670	FUSE-binding protein 2 / KH-type splicing regulatory protein	N/A	0	29.013	29.0361	28.7245	29.1219	30.3498	28.9724	28.9664	28.8449	29.085			0.122672	-0.0409133	156.27	163	52.7	9.83339	8.68547	8.67575	8.50541	8.8953	9.48234	8.61327	8.70339	8.53048	8.66089	18	17	13	21	32	13	15	13	18	100.05
TGVEG_216770;TGME49_216770;TGGT1_216770	hypothetical protein;putative transmembrane protein	HMM: MRVPHFASSALAAAFLVTCASAK, NN: MRVPHFASSALAAAFLVTCASAK	2	NaN	NaN	NaN	NaN	NaN	NaN	25.8616	NaN	NaN			0	NaN	6.5807	2	9.8	8.04883	NaN	NaN	NaN	NaN	7.57258	NaN	7.87229	NaN	NaN	0	0	0	0	1	0	1	0	0	17.637
TGVEG_216790;TGME49_216790;TGGT1_216790	ATP-binding cassette sub-family E member 1, putative;putative ATP-binding cassette sub-family E member 1	N/A	0	NaN	NaN	NaN	NaN	NaN	NaN	24.591	NaN	NaN			0	NaN	5.5814	4	6.7	7.86546	NaN	NaN	NaN	7.43369	NaN	NaN	7.4898	7.1854	NaN	0	0	0	1	0	0	2	1	0	69.219
TGVEG_216860;TGME49_216860;TGGT1_216860	DEAD (Asp-Glu-Ala-Asp) box polypeptide DDX39	N/A	0	29.2691	29.1493	29.0904	29.1842	30.0808	29.215	29.4768	29.4754	29.2018			0.954577	-0.215099	69.997	107	55.3	9.8704	8.8767	8.71084	8.79755	8.95466	9.3296	8.86869	8.84978	8.79877	8.61618	13	13	11	12	14	10	8	8	9	49.113
TGVEG_216880;TGME49_216880;TGGT1_216880	guanine nucleotide-binding protein	N/A	0	30.6206	30.7092	30.5592	30.7246	30.4194	30.7112	30.6702	30.5358	30.3964			0.456749	0.0955372	97.611	184	80.7	10.2152	9.23636	9.30969	9.26661	9.36903	9.21593	9.26387	9.26877	9.30754	9.03973	15	16	16	17	11	14	15	14	14	35.147
TGVEG_217460;TGME49_217460;TGGT1_217460	glutaminyl-tRNA synthetase (GlnRS)	HMM: MALSPGAVLRITRLASLPPLSTVTDVVLAY, NN: MALSPGAVLRITRLASLPPLSTVTDVVLAY	0	26.4427	26.5081	26.5084	26.5773	26.5332	26.3805	26.3938	26.5424	26.4946			0.0671945	0.0094293	32.53	40	23.8	8.98054	7.77194	8.04036	7.84163	8.04261	8.04064	8.26304	7.979	8.1682	7.85678	3	5	5	5	5	5	5	6	4	95.526
TGGT1_217540;TGVEG_217540;TGME49_217540	RNA recognition motif-containing protein	N/A	0	NaN	NaN	NaN	NaN	26.3149	NaN	NaN	NaN	NaN			0	NaN	8.4377	6	18.5	8.14242	NaN	NaN	NaN	NaN	8.05892	7.00672	NaN	NaN	7.1498	0	0	0	0	4	1	0	0	1	38.116
TGVEG_217570;TGME49_217570;TGGT1_217570	ribosomal protein RPS27	N/A	0	NaN	NaN	NaN	NaN	NaN	NaN	NaN	25.803	NaN			0	NaN	3.7837	7	15.2	8.65523	NaN	7.80236	NaN	6.80698	8.1833	NaN	8.22047	7.80345	NaN	0	1	0	1	1	0	1	1	0	16.954
TGGT1_217680;TGVEG_217680;TGME49_217680	hypothetical protein	N/A	0	NaN	NaN	NaN	NaN	NaN	NaN	22.3553	NaN	NaN			0	NaN	4.9594	5	1.4	8.03302	NaN	NaN	NaN	7.79649	7.47461	6.95089	6.8168	NaN	NaN	0	1	0	1	1	1	1	0	1	243.03
TGVEG_217740;TGME49_217740;TGGT1_217740	3-ketoacyl-(acyl-carrier-protein) reductase	HMM: METPVSVQTARRPSPSRSLNLLTLALSLFFAPTVSAR, NN: METPVSVQTARRPSPSRSLNLLTLALSLFFAPTVSAR;HMM: METPVSVQTARRPSSSRSLNLLTLALSLFFAPTVSAR, NN: METPVSVQTARRPSSSRSLNLLTLALSLFFAPTVSAR	0	25.09	25.0497	24.8108	25.2357	25.0482	NaN	25.3658	25.0471	25.1244			0.686397	-0.195587	11.865	16	9.8	8.53472	7.62857	7.6797	7.48882	7.66766	7.64186	7.32911	7.68559	7.53642	7.42839	3	3	3	2	2	2	2	2	2	39.04
TGVEG_217820;TGME49_217820;TGGT1_217820	PCI domain-containing protein	N/A	0	27.0957	27.062	27.2018	27.1388	26.7706	27.0174	27.063	26.9837	26.6878			0.790199	0.208322	26.891	45	30.2	9.14492	8.32621	8.0758	8.08307	8.46048	8.11478	7.91137	8.49872	7.95563	7.57869	5	5	5	7	5	3	8	5	4	51.722
TGVEG_217890;TGME49_217890;TGGT1_217890	alkyl hydroperoxide reductase/ Thiol specific antioxidant/ Mal allergen, putative;putative alkyl hydroperoxide reductase/ Thiol specific antioxidant/ Mal allergen	N/A	0	30.274	30.4863	30.3446	30.5441	29.901	30.2856	30.3203	30.0922	30.0798			0.955113	0.204188	55.763	127	77	10.1278	9.07777	9.2335	9.21189	9.35268	9.15464	9.1119	9.2319	9.22383	8.7251	11	10	10	11	10	10	10	12	10	21.722
TGVEG_218240;TGME49_218240;TGGT1_218240	hypothetical protein;putative transmembrane protein	HMM: MRPAFSGTSQGAGTRALWRWGRRSSFVSLCAASFLGVILLGSAQESLSA, NN: MRPAFSGTSQGAGTRALWRWGRRSSFVSLCAASFLGVILLGSAQESLSA	1	NaN	NaN	NaN	NaN	NaN	23.0887	NaN	NaN	NaN			0	NaN	6.0307	4	3.8	7.63659	NaN	7.16495	NaN	6.89317	NaN	7.03092	6.74864	NaN	6.6557	0	2	1	1	0	1	1	0	1	132.28
TGVEG_218280;TGME49_218280;TGGT1_218280	eukaryotic porin, putative;putative eukaryotic porin	N/A	0	NaN	NaN	NaN	NaN	24.2902	NaN	24.2279	23.9426	NaN			0	NaN	4.6565	13	4.3	8.14777	6.78854	7.1372	7.20973	7.22835	7.4558	7.02661	7.38117	7.23434	6.85388	1	1	1	1	2	1	2	2	1	50.57
TGVEG_218410;TGME49_218410;TGGT1_218410	ribosomal protein RPP0	N/A	0	30.3121	30.3553	30.1661	30.3375	30.9338	30.2605	30.3965	30.2803	30.14			0.0198279	0.00557772	65.993	144	58	10.1821	9.18079	9.12778	8.9966	9.3761	9.50619	9.26867	9.10765	9.16083	9.07511	13	11	11	10	10	10	10	12	11	34.157
TGGT1_218520;TGVEG_218520;TGME49_218520	microneme protein MIC6	HMM: MRLFRCCAAAVVAAESLLWLKNGS, NN: MRLFRCCAAAVVAAESLLWLKNGS	1	27.7236	28.0567	28.1713	27.9482	28.3145	27.9213	27.6125	27.9481	28.2418			0.0774829	0.0497354	42.106	49	24.6	9.43409	8.35949	8.36519	8.57102	8.48951	8.73198	8.37009	8.31929	8.4809	8.46249	5	3	5	5	6	3	5	5	5	36.656
TGVEG_218530;TGME49_218530;TGGT1_218530	proteasome-interacting thioredoxin domain-containing protein	N/A	0	NaN	23.5884	NaN	NaN	NaN	NaN	NaN	NaN	NaN			0	NaN	3.1566	0	4.6	7.14737	NaN	7.14737	NaN	NaN	NaN	NaN	NaN	NaN	NaN	0	1	0	0	0	0	0	0	0	38.088
TGME49_218780;TGGT1_218780;TGVEG_218780	phosphoserine aminotransferase, putative;putative phosphoserine aminotransferase	N/A	0	27.9197	27.9448	27.9427	27.9233	27.6534	27.7541	27.7757	27.6735	27.8033			1.99528	0.184898	139.89	76	41.2	9.37936	8.23426	8.5583	8.44213	8.58074	8.25118	8.4502	8.5643	8.24194	8.30739	6	12	8	10	6	9	12	7	7	52.754
TGVEG_218820;TGME49_218820;TGGT1_218820	alba 2	N/A	0	27.4906	27.6334	27.3544	27.4891	28.0795	27.3192	27.2955	26.8972	27.5016			0.600609	0.261348	16.313	33	44.6	9.2836	8.3078	8.43865	8.33628	8.45274	8.54192	8.21476	8.32873	7.95664	8.10415	4	4	5	4	3	4	4	3	3	15.391
TGVEG_218940;TGGT1_218940;TGME49_218940	hypothetical protein	N/A	0	25.1298	NaN	NaN	NaN	NaN	NaN	NaN	NaN	NaN			0	NaN	2.2339	7	10.1	8.0607	7.56483	NaN	6.79177	7.43462	7.18093	NaN	7.26977	7.04571	NaN	2	0	1	1	1	0	1	1	0	35.253
TGVEG_219140;TGME49_219140;TGGT1_219140	EF-1 guanine nucleotide exchange domain-containing protein	N/A	0	NaN	NaN	NaN	24.9248	NaN	NaN	NaN	NaN	NaN			0	NaN	4.5132	5	17.1	8.12879	NaN	NaN	7.44669	7.59247	NaN	NaN	7.8288	NaN	NaN	0	0	1	2	0	0	1	0	1	20.734
TGVEG_219170;TGME49_219170;TGGT1_219170	hypothetical protein	N/A	0	NaN	NaN	NaN	NaN	NaN	24.8883	NaN	NaN	NaN			0	NaN	3.4925	4	4.6	7.57265	NaN	NaN	NaN	NaN	NaN	7.57265	NaN	NaN	NaN	0	1	0	0	1	1	1	0	0	33.364
TGVEG_219270;TGME49_219270;TGGT1_219270	multi-pass transmembrane protein	N/A	6	25.8036	NaN	NaN	25.806	NaN	NaN	NaN	NaN	NaN			0	NaN	9.4539	12	12.3	8.39768	7.73729	7.56017	7.43276	7.88607	7.39662	NaN	7.26069	NaN	7.0703	2	1	1	2	1	0	1	0	1	43.033
TGVEG_219280;TGME49_219280;TGGT1_219280	actin like protein ALP1	N/A	0	NaN	23.9558	NaN	NaN	NaN	NaN	NaN	NaN	NaN			0	NaN	4.3008	2	9.7	7.49189	NaN	7.25797	NaN	NaN	NaN	7.1115	NaN	NaN	NaN	0	1	0	0	0	1	0	0	0	46.086
TGME49_219310;TGGT1_219310;TGVEG_219310	DnaK family protein	N/A	0	28.7577	28.6772	28.1915	28.6153	28.4528	28.6082	28.7487	28.7125	28.7281			0.456816	-0.187648	76.224	115	40.3	9.65141	8.61945	8.67603	8.3384	8.84566	8.61294	8.74008	8.90607	8.80811	8.42123	12	12	10	21	10	15	15	12	10	90.142
TGME49_219520;TGGT1_219520;TGVEG_219520	histone arginine methyltransferase PRMT1	N/A	0	25.4603	25.3001	25.3525	25.1366	24.9656	NaN	25.2311	25.2675	NaN			0.83516	0.121653	10.697	18	16.3	8.55587	7.77528	7.62324	7.61824	7.70516	7.61459	7.37541	7.64595	7.59771	7.23139	3	2	2	3	2	1	2	2	1	44.029
TGVEG_219540;TGME49_219540;TGGT1_219540	cytosolic tRNA-Ala synthetase	HMM: MLDVPILCALLVLLLSSLPAGAGAL, NN: MLDVPILCALLVLLLSSLPAGAGAL	0	29.7114	29.7014	29.5188	29.6757	29.2784	29.8114	29.6499	29.6206	29.588			0.138289	0.0243613	124.17	139	32.7	9.92384	8.99202	9.08192	8.85034	9.06149	9.03651	8.89705	8.91283	8.96082	8.86513	18	22	16	15	19	14	16	16	16	139.29
TGVEG_219550;TGME49_219550;TGGT1_219550	dihydrolipoyllysine-residue succinyltransferase component of oxoglutarate dehydrogenase	HMM: MPVLAAAAAASRRGLSSLLLPVECR, NN: MPVLAAAAAASRRGLSSLLLPVECR	0	NaN	NaN	NaN	24.4031	NaN	NaN	NaN	NaN	NaN			0	NaN	6.035	2	9.6	7.81351	NaN	7.40819	NaN	7.43541	NaN	NaN	NaN	NaN	7.08775	0	1	0	1	1	0	0	0	1	50.125
TGVEG_219750;TGME49_219750;TGGT1_219750	cytochrome c, putative;putative cytochrome c	N/A	0	27.3241	26.9875	25.8168	NaN	26.6462	27.0616	27.2508	NaN	27.3272			0.399398	-0.579572	9.1977	18	32.2	9.05327	8.33129	8.1359	7.72028	7.54565	8.12655	8.23674	8.33488	7.48426	8.14186	2	2	2	2	2	3	2	2	2	12.453
TGVEG_219800;TGME49_219800;TGGT1_219800	putative vacuolar ATP synthase subunit b;vacuolar ATP synthase subunit b, putative	N/A	0	25.8717	25.7316	25.5562	25.4673	25.7864	NaN	25.7294	25.804	25.5071			0.112834	0.0397078	20.797	23	20	8.69204	7.63879	8.04622	7.40919	7.69662	7.54162	7.2742	8.06532	7.49781	7.7828	4	4	2	4	2	1	4	3	3	56.614
TGVEG_219810;TGME49_219810;TGGT1_219810	hypothetical protein;putative transmembrane protein	N/A	1	NaN	NaN	NaN	NaN	NaN	NaN	23.539	NaN	NaN			0	NaN	2.7485	1	1.8	7.1731	NaN	NaN	NaN	NaN	NaN	NaN	7.1731	NaN	NaN	0	0	0	0	0	0	1	0	0	106.43
TGVEG_219850;TGME49_219850;TGGT1_219850	prolyl-tRNA synthetase (ProRS)	HMM: MRPGVFSRGFCRPGTLFSPFSLLFSSLWWTLWTRPSTTLAF, NN: MRPGVFSRGFCRPGTLFSPFSLLFSSLWWTLWTR	0	28.9958	29.0912	28.9078	29.1137	28.7375	29.0167	28.9795	28.8853	28.7322			0.67308	0.132586	68.545	142	38.1	9.72813	8.70136	8.75819	8.6965	8.90274	8.90451	8.8007	8.8685	8.71394	8.45349	17	16	14	15	16	12	16	16	15	93.444
TGVEG_220100;TGME49_220100;TGGT1_220100	phosphoribosylpyrophosphate synthetase	N/A	0	25.5849	NaN	NaN	25.7488	26.1999	25.8094	NaN	25.6902	NaN			0	-0.105278	17.773	21	19.2	8.60906	7.78138	7.16107	7.08099	7.77641	8.08888	7.71897	7.18907	7.77395	6.99138	4	1	1	3	5	2	1	4	1	60.997
TGGT1_220240;TGVEG_220240;TGME49_220240	hypothetical protein;putative transmembrane protein	HMM: MEVRHRSVQLFWVVGLLGFLIYVVSLHGSPVNAA, NN: MEVRHRSVQLFWVVGLLGFLIYVVSLHGS	2	28.2963	28.432	28.2579	28.3205	28.1389	28.3842	28.1235	28.374	28.3067			0.264421	0.060674	49.162	62	31.7	9.52287	8.52366	8.64385	8.51537	8.63603	8.65837	8.6528	8.46298	8.54235	8.40625	7	9	7	8	9	8	6	6	6	54.11
TGVEG_220270;TGME49_220270;TGGT1_220270	alveolin domain containing intermediate filament IMC6	N/A	0	NaN	NaN	27.0295	25.4077	NaN	NaN	NaN	NaN	NaN			0	NaN	19.511	11	14.6	8.64558	7.69452	7.51713	8.17782	7.71283	NaN	7.6114	7.42164	7.95563	NaN	3	1	2	2	0	1	1	1	0	48.634
TGVEG_220400;TGGT1_220400;TGME49_220400	actin depolymerizing factor ADF	N/A	0	31.6149	31.4459	31.4627	31.2776	31.2125	31.3807	31.4067	31.4392	31.2963			0.856219	0.127101	44.197	127	89.8	10.4588	9.58088	9.57959	9.61655	9.53954	9.51772	9.45873	9.4903	9.38856	9.26545	10	8	8	8	5	8	7	8	8	12.948
TGVEG_220500;TGME49_220500;TGGT1_220500	UBX domain-containing protein	N/A	0	NaN	NaN	NaN	24.197	NaN	NaN	NaN	NaN	24.6281			0	NaN	6.1206	10	6.7	8.01389	7.1377	NaN	7.08955	7.37444	7.01941	7.055	NaN	7.03941	7.31794	1	1	1	2	1	1	1	1	2	43.132
TGVEG_220890;TGME49_220890;TGGT1_220890	hypothetical protein;putative transmembrane protein	N/A	1	NaN	NaN	NaN	NaN	NaN	NaN	NaN	24.1506	NaN			0	NaN	2.1798	7	2.2	7.96683	6.88624	7.09015	6.70679	6.88511	NaN	6.9118	7.49809	7.30602	NaN	1	1	1	1	0	1	1	1	0	51.171
TGVEG_220900;TGME49_220900;TGGT1_220900	hypothetical protein	N/A	0	NaN	NaN	NaN	NaN	NaN	NaN	NaN	NaN	24.3685			0	NaN	2.8094	3	3.7	7.54941	NaN	NaN	6.93597	NaN	6.97331	NaN	NaN	NaN	7.24055	0	0	1	0	1	0	0	0	2	77.967
TGGT1_220950;TGVEG_442370;TGME49_220950;TGVEG_220950	hypothetical protein	HMM: GFVFASTAASTIAASTIAAS, NN: GFVFASTAASTIAASTIAA;N/A	0	28.3677	28.8282	28.2307	28.4493	28.8617	28.3455	28.6229	28.4269	28.3551			0.0120739	0.00722758	13.658	49	41.3	9.59766	8.443	8.68862	8.51264	8.80833	8.79644	8.53125	8.82618	8.53356	8.39433	3	4	4	4	3	3	3	3	3	35.62
TGME49_221170;TGGT1_221170;TGVEG_221170B	CAAX metallo endopeptidase	N/A	2;5	NaN	NaN	NaN	26.6834	NaN	NaN	NaN	NaN	NaN			0	NaN	2.0313	2	5.6	8.12186	NaN	NaN	NaN	8.12186	NaN	NaN	NaN	NaN	NaN	0	0	0	3	0	0	0	0	0	49.432
TGVEG_221180;TGGT1_221180;TGME49_221180	hypothetical protein;putative transmembrane protein	HMM: MAGSIHRASGVCRCIFFFLVASLAAPREGCAV, NN: MAGSIHRASGVCRCIFFFLVASLAAPREGCAV	5	NaN	NaN	NaN	NaN	NaN	25.6407	NaN	NaN	NaN			0	NaN	2.3036	6	3.8	8.2237	7.5583	7.17759	6.85958	7.03623	7.0447	7.79915	NaN	7.11501	7.03989	1	1	1	1	1	2	0	1	1	79.261
TGVEG_221210;TGME49_221210;TGGT1_221210	cyclophilin	HMM: MKLVLFFLALAVSGAVAE, NN: MKLVLFFLALAVSGAVAE;HMM: MKLVLLFLALAVSGAVAE, NN: MKLVLLFLALAVSGAVAE	0	29.722	29.7449	29.4268	29.5573	29.2014	29.5641	29.4322	29.5539	29.7882			0.0974391	0.0398013	35.851	107	72.6	9.9354	9.15718	9.09328	9.03479	9.04774	8.79076	8.91549	8.85792	8.95041	8.83808	10	10	9	9	7	9	8	8	9	19.638
TGVEG_221320;TGME49_221320;TGGT1_221320	acetyl-CoA carboxylase ACC1	HMM: MPIRTHARVRSVCTMGVVSRAAAA, NN: MPIRTHARVRSVCTMGVVSRAAAA;HMM: MPTRTHARVRSVCTMGVVSRAAAA, NN: MPTRTHARVRSVCTMGVVSRAAAA	1	NaN	NaN	NaN	NaN	NaN	NaN	NaN	NaN	23.5748			0	NaN	2.1608	2	0.5	7.00165	NaN	NaN	NaN	NaN	NaN	NaN	NaN	NaN	7.00165	1	0	0	0	0	0	0	0	1	287.58
TGVEG_221380;TGME49_221380;TGGT1_221380	alba 1	N/A	0	27.8974	28.0625	28.0144	27.9534	28.5475	27.8973	27.8727	28.1884	28.0719			0.194695	-0.0529474	31.242	63	41.3	9.45729	8.38879	8.52081	8.43109	8.53663	8.65807	8.55346	8.51299	8.48609	8.36337	5	7	5	7	8	8	7	8	7	27.258
TGVEG_221470;TGME49_221470;TGGT1_221470	hypothetical protein	N/A	0	25.5165	25.4947	NaN	25.6098	NaN	NaN	25.9353	25.6918	NaN			0.892851	-0.307937	20.559	16	23.2	8.57103	7.6163	7.76512	6.99197	7.85208	7.14433	7.48688	7.99319	7.5513	7.12218	3	4	1	4	1	2	4	3	1	61.617
TGVEG_221510;TGME49_221510;TGGT1_221510	hypothetical protein	HMM: MAFASVCAKLPALARGSVGK, NN: MAFASVCAKLPALARGS	0	NaN	NaN	NaN	NaN	25.5244	NaN	NaN	NaN	NaN			0	NaN	3.5647	10	27	8.51618	7.53745	7.67667	7.63639	7.52594	7.82094	7.5427	7.56957	NaN	7.49396	1	2	1	1	2	1	1	0	1	17.913
TGME49_221522;TGGT1_221522;TGVEG_221522	adaptor complexes medium subunit family protein	N/A	0	NaN	NaN	NaN	NaN	NaN	NaN	22.4775	NaN	NaN			0	NaN	4.7761	1	5.1	6.85358	NaN	NaN	NaN	NaN	NaN	NaN	6.85358	NaN	NaN	1	0	0	0	0	0	1	0	0	61.127
TGVEG_221620;TGME49_221620;TGGT1_221620;TGVEG_212240;TGME49_212240;TGGT1_212240	beta-1 tubulin, putative;beta-tubulin, putative;putative beta-1 tubulin;putative beta-tubulin	N/A	0	27.2534	27.1544	27.0032	27.5251	27.4346	27.5857	27.6505	27.614	NaN			1.86399	-0.495219	17.52	27	66.1	9.29332	7.99353	8.90784	8.51348	8.03121	8.19871	8.16137	8.20884	8.15079	7.24378	3	4	4	2	3	3	3	3	1	50.037
TGVEG_221950;TGME49_221950;TGGT1_221950	putative splicesome-associated protein;splicesome-associated protein, putative	N/A	0	NaN	23.1168	NaN	NaN	NaN	NaN	NaN	NaN	NaN			0	NaN	2.4192	1	3.6	7.25022	6.88461	7.0054	NaN	NaN	NaN	NaN	NaN	NaN	NaN	1	1	0	0	0	0	0	0	0	64.911
TGVEG_222020;TGME49_222020;TGGT1_222020	phosphoglycerate kinase PGKII	N/A	0	NaN	NaN	26.2034	NaN	NaN	NaN	NaN	NaN	NaN			0	NaN	2.6889	2	2.7	7.94599	NaN	6.68826	7.92131	NaN	NaN	NaN	NaN	NaN	NaN	0	1	1	0	0	0	0	0	0	63.05
TGVEG_222170;TGME49_222170;TGGT1_222170	dense-granule antigen DG32	N/A	0	26.7819	NaN	25.1674	25.9161	NaN	25.1723	26.1376	NaN	27.1993			0.261813	-0.693792	13.361	20	26.3	8.81887	8.15524	7.34056	7.68438	7.8226	7.94497	7.81873	7.64504	7.78616	8.07929	4	1	3	4	1	3	2	2	3	33.637
TGVEG_222220;TGME49_222220;TGGT1_222220	alveolin domain containing intermediate filament IMC7	N/A	0	NaN	NaN	NaN	NaN	NaN	25.9304	25.7606	26.1039	NaN			0	NaN	24.464	15	20.3	8.75014	7.61768	7.98156	7.85323	7.82563	7.71559	7.5791	7.90784	8.01473	7.105	2	3	3	2	3	2	3	3	1	46.784
TGVEG_222850;TGME49_222850;TGGT1_222850	stress responsive a/b barrel domain-containing protein	N/A	0	NaN	NaN	NaN	NaN	NaN	NaN	23.8901	NaN	NaN			0	NaN	2.1311	5	17.8	8.07562	7.25645	7.40601	NaN	NaN	7.48818	7.41042	7.27882	NaN	NaN	1	1	0	0	1	1	1	0	0	11.923
TGVEG_222860;TGME49_222860;TGGT1_222860	eukaryotic translation initiation factor, putative;putative eukaryotic translation initiation factor	N/A	0	28.2102	28.3669	28.3457	28.3033	28.4247	28.5606	28.5491	28.6344	28.4476			1.49774	-0.236149	51.488	89	30.8	9.60537	8.45257	8.6535	8.42506	8.73517	8.90537	8.69352	8.83958	8.48202	8.28939	12	11	9	13	12	9	12	8	5	88.391
TGVEG_223040;TGGT1_223040;TGME49_223040	hypothetical protein	N/A	0	NaN	25.806	NaN	NaN	NaN	NaN	NaN	NaN	26.7974			0	-0.991318	5.9507	8	20.5	8.51587	NaN	7.69751	7.10408	NaN	NaN	7.82314	NaN	7.97337	8.02061	0	2	1	0	0	2	0	2	2	27.46
TGVEG_223050;TGME49_223050;TGGT1_223050	ribosomal protein RPS20	N/A	0	28.8908	28.9082	29.1164	28.9387	28.5666	28.7504	28.8498	28.6551	28.6771			1.20782	0.244444	29.956	66	27	9.68275	8.67356	8.75176	8.51936	8.80329	8.59506	8.84402	8.85548	8.76018	8.63306	6	6	4	7	7	7	7	7	7	25.899
TGME49_223070;TGGT1_223070;TGVEG_223070	hypothetical protein	N/A	0	NaN	NaN	NaN	NaN	NaN	25.0579	NaN	NaN	NaN			0	NaN	4.5061	4	17.1	8.16997	6.98568	7.32091	7.4391	NaN	7.67906	7.62371	NaN	NaN	NaN	1	1	1	0	1	1	0	0	0	23.925
TGVEG_223140;TGGT1_223140;TGME49_223140	tRNA binding domain-containing protein	HMM: MELIYDSTPAALATVLLARYVQPCLLQ, NN: MELIYDSTPAALATVLLARYVQPCLLQ	0	26.0885	25.659	26.127	26.1161	25.9533	25.8069	26.0157	26.1148	NaN			0.204233	-0.10706	14.627	31	22.9	8.81021	7.67273	7.50258	7.75887	8.10988	8.01903	8.02135	7.76964	7.98697	7.19025	3	3	3	5	4	5	3	4	1	51.026
TGVEG_223390;TGME49_223390;TGGT1_223390	activating signal cointegrator 1 complex subunit 3 family 1 ASCC3L1, putative;putative activating signal cointegrator 1 complex subunit 3 family 1 ASCC3L1	N/A	0	NaN	NaN	NaN	NaN	NaN	NaN	NaN	26.0516	NaN			0	NaN	11.574	9	2.6	8.34557	7.72795	7.0983	6.99666	7.60211	NaN	7.47897	NaN	7.87827	NaN	1	1	1	1	1	3	0	2	0	248.41
TGVEG_223410;TGME49_223410;TGGT1_223410	eukaryotic initiation factor-4E, putative;putative eukaryotic initiation factor-4E	N/A	0	26.7363	26.9805	NaN	27.3011	26.7501	27.1336	27.0392	26.7756	NaN			0.0909869	-0.0489073	17.425	22	29.3	9.07646	7.94242	8.14607	7.96889	8.39277	8.31643	8.15198	8.15528	8.12287	NaN	2	3	1	4	5	2	2	3	0	25.981
TGVEG_223485;TGGT1_223485	hypothetical protein	HMM: MRVPGFPSLTFRADSLLVQCCIAACVWYGPQDAAAV, NN: MRVPGFPSLTFRADSLLVQCCIAA	0	NaN	NaN	NaN	NaN	NaN	NaN	NaN	22.8918	NaN			0	NaN	2.7174	1	12.9	6.92707	NaN	NaN	NaN	NaN	NaN	NaN	NaN	6.92707	NaN	0	0	0	0	0	0	0	1	0	10.307
TGVEG_223500;TGME49_223500;TGGT1_223500	hypothetical protein	N/A	0	NaN	NaN	NaN	NaN	NaN	NaN	23.5221	NaN	NaN			0	NaN	1.7983	1	1.3	7.16803	NaN	NaN	NaN	NaN	NaN	NaN	7.16803	NaN	NaN	0	0	0	0	0	0	1	0	0	121.03
TGME49_223540;TGGT1_223540;TGVEG_223540	importin-beta N-terminal domain-containing protein	N/A	0	NaN	NaN	NaN	NaN	NaN	25.4555	NaN	NaN	NaN			0	NaN	6.1621	2	4.1	8.19687	NaN	7.36648	NaN	7.81242	NaN	7.74342	NaN	7.13922	NaN	0	1	0	1	0	1	0	1	0	122.22
TGVEG_223590;TGME49_223590;TGGT1_223590	proteasome subunit	HMM: MKNYRCERFSCLLFACAVCPSTLR, NN: MKNYRCERFSCLLFACAVCPSTLRKHQVTFCGIWSRFELVVFAA;HMM: MKNYRCGRFSCLLFACAVCPSTLR, NN: MKNYRCGRFSCLLFACAVCPSTLRKHQVTFCGIWSRFELVVFAA	0	NaN	NaN	25.8439	26.1694	25.6459	NaN	NaN	25.8044	NaN			0	0.0395088	6.8629	11	8.4	8.55184	7.20409	7.3822	7.82625	7.94967	7.86188	7.36309	NaN	7.80821	NaN	1	1	2	2	2	1	0	2	0	39.396
TGVEG_223680;TGME49_223680;TGGT1_223680	ubiquitin family protein	N/A	0	23.7035	NaN	NaN	NaN	NaN	NaN	NaN	NaN	NaN			0	NaN	3.5774	1	4.3	7.13545	7.13545	NaN	NaN	NaN	NaN	NaN	NaN	NaN	NaN	1	0	0	0	0	0	0	0	0	41.747
TGVEG_223710;TGME49_223710;TGGT1_223710	tetratricopeptide repeat-containing protein	N/A	0	NaN	24.0248	NaN	NaN	NaN	NaN	NaN	NaN	NaN			0	NaN	3.6613	7	2.1	7.69464	NaN	7.27871	6.83978	7.23805	NaN	NaN	NaN	NaN	6.79872	0	2	1	1	0	1	0	0	1	109.19
TGVEG_223920;TGGT1_223920;TGME49_223920;TGME49_327200	rhoptry neck protein RON3;rhoptry neck protein, putative	HMM: MTTSPRVAKWALRVLALVFLHHVTVCT, NN: MTTSPRVAKWALRVLALVFLHHVTVCT;HMM: QQTRHILPFGSLFPGGILGK, NN: QQTRHILPFGSLFPGGILGKIMQKLMRSYIMFFHPVLAN	1	26.1186	26.5299	25.9431	25.689	26.9441	26.6948	27.5362	26.9974	26.545			1.16314	-0.829022	38.85	45	9.4	9.04556	7.81545	8.03846	7.60761	8.04657	8.26933	8.12031	8.47371	8.06465	7.72111	5	6	4	9	5	5	10	4	2	222.93
TGVEG_223930;TGME49_223930;TGGT1_223930	RNA recognition motif-containing protein	N/A	0	NaN	NaN	NaN	23.4665	NaN	NaN	NaN	NaN	NaN			0	NaN	5.4654	3	9.9	7.94682	6.87975	6.9835	NaN	7.15345	7.28921	NaN	7.24954	6.85137	7.10377	1	1	0	2	2	0	2	1	1	40.671
TGVEG_223960;TGME49_223960;TGGT1_223960	ubiquitin interaction motif family protein	N/A	0	25.3804	26.01	25.9315	25.8896	NaN	24.7636	25.2293	25.4252	24.9802			1.11956	0.562403	11.49	17	13.4	8.66873	7.33616	7.99245	7.97702	7.85216	7.62903	7.42385	7.613	7.67838	7.35434	2	3	2	2	1	2	2	3	2	41.377
TGVEG_224060;TGME49_224060;TGGT1_224060	putative thioredoxin;thioredoxin, putative	HMM: MAPRTSLALLALYALVSTSSHLLPDSFPPSFSSLSLSGVSAA, NN: MAPRTSLALLALYALVSTSSHLL	0	26.8152	27.1664	26.4036	NaN	26.9832	26.8506	26.4798	26.7689	25.6659			0.545886	0.490193	23.24	32	20.7	9.12415	7.79364	8.49023	7.96808	8.51837	8.26364	8.03052	7.9884	8.02206	7.63736	6	4	4	2	6	3	4	4	3	68.947
TGVEG_224130;TGME49_224130;TGGT1_224130	hypothetical protein;RNA recognition motif (A.K.A RRM, RBD, or RNP domain) protein	N/A	0	NaN	26.5361	NaN	NaN	NaN	NaN	NaN	NaN	NaN			0	NaN	6.8545	7	31.8	8.47544	7.55422	8.03471	7.54115	6.99758	NaN	7.75116	7.72919	NaN	NaN	2	2	1	1	0	1	1	0	0	16.631
TGVEG_224460;TGME49_224460;TGGT1_224460	aminopeptidase n, putative;putative aminopeptidase n	HMM: MVTLSATTMNATVSPCRISGGVSSRLCGWGVLSFLLASVITVQVSRAG, NN: MVTLSATTMNATVSPCRISGGVSSRLCGWGVLSFLLASVITVQVSRAG	0	28.7399	28.7333	28.3714	28.7911	28.5233	28.6969	28.7038	28.6293	28.7218			0.218398	-0.0701001	108.27	155	37.6	9.63352	8.55154	8.81155	8.52885	8.78951	8.69254	8.69946	8.7132	8.70497	8.51292	17	24	19	18	18	18	18	19	16	108.75
TGME49_224850;TGVEG_224850;TGGT1_224850	polyadenylate binding protein, putative;putative polyadenylate binding protein	N/A	0	28.514	28.4904	28.3882	28.5494	29.3926	28.3998	28.2468	28.333	28.4401			0.849299	0.124262	84.962	104	27.9	9.62058	8.49944	8.59497	8.53134	8.66304	9.07867	8.69739	8.53512	8.57064	8.40322	9	11	10	11	16	13	11	10	10	82.572
TGVEG_224900;TGME49_224900;TGGT1_224900	adenylate kinase, putative;putative adenylate kinase	N/A	0	26.1569	NaN	NaN	NaN	25.8513	26.2342	25.9866	26.1998	26.1417			0	0.0475712	19.547	22	38.5	8.75396	7.64803	7.44655	7.67233	7.16622	8.10106	7.95359	7.68819	7.95016	7.89968	2	1	2	1	4	4	3	5	4	28.56
TGME49_225050;TGGT1_225050;TGVEG_225050;TGME49_326800	adenosylhomocysteinase, putative;putative adenosylhomocysteinase;S-Adenosyl homocysteine hydrolase	HMM: DALLRSSVSWLSRRDARRSPWWCTVMALTWGEGA, NN: DALLRSSVSWLSRRDARRSPWWCTVMALTWGEGAGP;HMM: MRALFLSQESDGFLSPLCFLPGSPSSSF, NN: MRALFLSQESDGFLSPLCFLPGSPSSSFPHILQKRQPFLSLFLFAKTSQSRGR;N/A	0	30.1431	30.1699	30.0921	30.1385	29.887	30.0922	30.0882	30.0755	29.9788			0.991795	0.0875219	73.726	137	42.9	10.0642	9.03092	9.09409	8.9895	9.22611	9.09015	9.13004	9.15845	9.24893	8.9159	13	15	11	16	12	14	15	17	14	64.105
TGVEG_225080;TGME49_225080;TGGT1_225080	ribosomal protein RPS18	N/A	0	29.8025	29.853	29.7215	29.8171	30.8686	29.745	29.7965	29.8619	29.9921			0.588972	-0.0911363	58.738	124	64.1	10.0427	8.99526	9.05607	8.99918	9.09753	9.43922	8.94705	9.082	8.99426	8.91758	11	10	10	10	11	8	10	10	9	17.722
TGVEG_225125;TGME49_225125;TGGT1_225125	pre-rRNA processing protein	N/A	0	NaN	NaN	NaN	NaN	24.0208	NaN	NaN	NaN	NaN			0	NaN	6.3942	3	1.1	7.36832	NaN	NaN	NaN	NaN	7.36832	NaN	NaN	NaN	NaN	0	0	0	0	3	0	0	0	0	309.91
TGVEG_225160;TGME49_225160;TGGT1_225160	hypothetical protein;putative transmembrane protein	HMM: MDAQRSSRFQQVKASIIQLVYWCLLNATMVLPI, NN: MDAQRSSRFQQVKASIIQLVYWCLLNATMVLPIFCV	2	23.6178	NaN	NaN	NaN	NaN	NaN	NaN	NaN	NaN			0	NaN	5.4551	7	9.5	7.83025	7.10968	7.16343	NaN	NaN	7.26086	6.85776	7.04301	6.57102	NaN	2	2	0	0	1	1	1	1	0	45.387
TGVEG_225310;TGME49_225310;TGGT1_225310	ARF1-directed GTPase-activating protein, putative;putative ARF1-directed GTPase-activating protein	N/A	0	NaN	NaN	NaN	NaN	NaN	23.1879	NaN	NaN	NaN			0	NaN	2.5332	2	2.6	7.32668	NaN	6.98745	NaN	NaN	NaN	7.06077	NaN	NaN	NaN	0	1	0	0	0	1	0	0	0	52.458
TGVEG_225930;TGME49_225930;TGGT1_225930	triose-phosphate isomerase TPI-I	N/A	0	27.6402	27.7835	27.2735	27.7806	27.3193	27.5834	27.596	27.7352	27.4692			0.0707862	-0.0344213	22.572	54	39.9	9.33658	8.08012	8.61255	7.93017	8.6193	8.30805	8.32154	8.51654	8.47732	7.98976	5	6	4	7	5	6	7	6	4	27.89
TGVEG_226000;TGME49_226000;TGGT1_226000	ATP synthase, putative;putative ATP synthase	HMM: MFARAFSRFASLAAPAPQRGWNAFVLPSRHFATAAGGA, NN: MFARAFSRFASLAAPAPQRGWNAFVLPSRHFATAAGGA	0	NaN	NaN	28.0077	NaN	NaN	NaN	NaN	NaN	NaN			0	NaN	12.647	13	13.1	9.14019	7.90806	7.83834	8.61674	8.1174	8.14136	7.98439	8.34007	8.18915	7.89209	1	1	2	1	1	1	1	1	1	19.457
TGVEG_226030;TGME49_226030;TGGT1_226030	AGC kinase	N/A	0	NaN	NaN	NaN	NaN	26.8235	26.943	27.5213	27.7382	27.1591			0	NaN	7.8539	16	12.8	8.99807	7.27103	NaN	7.23152	7.38225	8.23009	8.18566	8.47015	8.35572	7.95662	1	0	1	2	3	4	2	2	2	39.41
TGVEG_226250;TGME49_226250;TGGT1_226250	DEAD (Asp-Glu-Ala-Asp) box polypeptide DDX3X	N/A	0	28.9982	29.0742	28.8422	28.9764	28.7231	28.7795	28.9779	28.9034	28.8587			0.309928	0.0581977	69.852	115	39.5	9.70792	8.77234	8.76353	8.99717	8.86772	8.73905	8.58969	8.64316	8.69569	8.51582	14	14	16	12	12	12	13	12	13	78.592
TGVEG_226380;TGGT1_226380;TGME49_226380	hypothetical protein;putative transmembrane protein	HMM: MYPLTVYSILAVVGLSLVCRGI, NN: MYPLTVYSILAVVGLSLVCRGIATE;HMM: MYPLTVYWILAVVGLSLVCRGI, NN: MYPLTVYWILAVVGLSLVCRGIATE	2	NaN	NaN	NaN	25.7995	NaN	NaN	NaN	NaN	NaN			0	NaN	8.8258	9	10.6	8.24586	7.14721	7.57928	7.15247	7.85577	NaN	NaN	NaN	7.58214	NaN	2	1	1	2	1	0	0	2	0	42.771
TGGT1_226410;TGVEG_226410;TGME49_226410	EF-1 guanine nucleotide exchange domain-containing protein	HMM: MRAAAKSLPSRWSSVRLRCEKVPACFCATSSPPGGRST, NN: MRAAAKSLPSRWSSVRLRCE;N/A	0	28.8302	28.5216	28.7772	28.6839	28.3931	28.6572	28.9357	28.8246	28.8154			0.655332	-0.148889	51.451	67	52.4	9.65146	8.70103	8.4706	8.72061	8.61312	8.73644	8.61113	8.89917	8.85079	8.46627	7	7	8	5	8	6	8	9	6	36.029
TGVEG_226430;TGGT1_226430;TGME49_226430	reticulon protein	N/A	3	27.1206	27.29	27.2424	27.0835	NaN	27.4139	26.9709	27.3241	26.3241			0.507833	0.344624	8.5193	23	21.4	9.12603	8.15721	8.2929	8.32469	8.23208	7.51327	8.40564	8.09205	8.16876	7.75372	4	4	4	4	1	4	3	3	3	21.592
TGVEG_226570;TGME49_226570;TGGT1_226570	hypothetical protein	N/A	0	25.9702	NaN	26.9708	26.7071	26.7572	NaN	NaN	26.5519	NaN			0	-0.081419	6.1436	15	70.5	8.89634	7.7835	7.46274	8.20066	8.09747	8.19293	7.78507	7.8101	8.01528	7.46183	2	1	3	2	2	1	1	2	1	14.996
TGVEG_226590;TGME49_226590;TGGT1_226590	cytochrome C oxidase subunit IIa, putative;putative cytochrome C oxidase subunit IIa	HMM: MLAYFAASRELALVFCVGTTLPE, NN: MLAYFAASRELALVFCVGTTLPE;HMM: MLAYFAASRELAVVFCVGTTLPE, NN: MLAYFAASRELAVVFCV	1	NaN	NaN	NaN	NaN	NaN	NaN	NaN	NaN	28.7657			0	NaN	3.5092	3	9.7	8.64976	6.4813	7.46719	NaN	NaN	NaN	NaN	7.67615	NaN	8.56425	1	1	0	0	0	0	1	0	2	34.488
TGVEG_226710;TGME49_226710;TGGT1_226710	hypothetical protein;putative transmembrane protein	HMM: MRFPASAASRPLLSLLALLLLANSRLAVAT, NN: MRFPASAASRPLLSLLALLLLANSRLAVAT	4;6	NaN	NaN	NaN	NaN	NaN	NaN	NaN	NaN	23.4879			0	NaN	2.3333	8	6.4	8.44476	7.62288	7.15655	7.16953	NaN	7.38625	7.33794	8.12166	7.28983	6.97545	1	1	1	0	1	1	1	1	1	33.286
TGVEG_226730;TGGT1_226730;TGME49_226730	aconitate hydratase ACN/IRP	HMM: MRILVPLVFLAAQIPPASLE, NN: MRILVPLVFLAAQIPPASLE	0	26.6454	26.7484	26.4545	27.5761	27.1759	27.0971	26.5942	26.5545	25.7491			0.476576	0.316822	30.705	43	18.9	9.09802	7.96488	8.11641	7.82999	8.58075	8.35666	8.17061	8.08095	7.67412	7.5868	7	8	4	10	7	5	7	3	4	114.87
TGGT1_226830;TGVEG_226830;TGME49_226830	DnaK family protein	HMM: MALPAFEGVSPCVGGDRRVSPSGSSVRFSSHSSRLGCFFFAFCFLSVSLFSPLGAKAQ, NN: MALPAFEGVSPCVGGDRRVSPSGSSVRFSSHSSRLGCFFFAFCFLSVSLFSPLGAKAQ;HMM: MALPAFEGVSPCVGGDRRVSPSGSSVRSLSHSSRLGCFFFAFCFLSVSLFSPLGAKAQ, NN: MALPAFEGVSPCVGGDRRVSPSGSSVRSLSHSSRLGCFFFAFCFLSVSLFSPLGAKAQ;HMM: MALPAFEGVSPCVGGHRRVSPSGSSVRSLSHSSRLGCFFFAFCFLSVSLFSPLGAKAQ, NN: MALPAFEGVSPCVGGHRRVSPSGSSVRSLSHSSRLGCFFFAFCFLSVSLFSPLGAKAQ	0	26.3846	26.2465	26.1915	26.2688	25.9621	26.0784	26.4575	26.1119	26.1403			0.109022	0.0376282	24.526	27	16.1	8.89707	7.93611	7.74327	7.67267	8.00385	7.69546	8.12061	8.29159	7.79083	7.77988	5	3	3	5	3	6	6	4	5	104.93
TGVEG_226860;TGME49_226860;TGGT1_226860	SAG-related sequence SRS67	HMM: MAFRKPLFSGRQWVALMCVFAAVGGK, NN: MAFRKPLFSGRQWVALMCVFAAVGGK;HMM: MGFRKPVFSGRQWVALMCVFAAVGGK, NN: MGFRKPVFSGRQWVALMCVFAAVGGK	0;1	NaN	NaN	NaN	25.5637	26.6994	25.4577	NaN	25.422	NaN			0	NaN	8.5505	10	15.7	8.57511	6.91572	7.3119	NaN	7.78822	8.17964	7.72606	7.38128	7.69087	6.91395	1	1	0	2	2	2	1	2	1	23.039
TGVEG_226960;TGME49_226960;TGGT1_226960	phosphofructokinase PFKII	N/A	0	31.279	31.2476	31.1105	31.3125	31.0121	31.2799	31.2426	31.2393	31.0883			0.111471	0.0223281	178.85	334	46	10.4034	9.47113	9.4962	9.44922	9.536	9.48732	9.43677	9.48237	9.42451	9.16953	35	37	35	36	35	36	32	33	29	131.36
TGVEG_226970;TGME49_226970;TGGT1_226970	ribosomal protein RPS11	N/A	0	29.2768	29.3353	29.1727	29.4603	29.6213	29.1947	29.082	28.8689	29.2814			0.649117	0.184193	37.388	73	57.1	9.81429	8.93524	8.87292	8.80088	8.88729	9.00992	8.8032	8.80638	8.84434	8.70874	9	6	6	5	7	6	6	8	6	18.677
TGVEG_226980;TGME49_226980;TGGT1_226980	hypothetical protein;translation initiation factor eIF3 subunit	N/A	0	NaN	NaN	25.1786	NaN	NaN	NaN	NaN	NaN	NaN			0	NaN	5.2229	6	22.5	7.95868	6.92821	7.16328	7.61282	NaN	NaN	7.42943	NaN	NaN	NaN	1	1	2	0	1	1	1	0	1	25.324
TGVEG_227030;TGME49_227030;TGGT1_227030	hypothetical protein	N/A	0	25.3935	25.4291	NaN	NaN	24.951	NaN	NaN	25.1238	24.9683			1.35131	0.365256	11.756	23	32.9	8.55167	7.54612	7.74273	7.49672	7.59852	7.57903	7.66071	7.56398	7.63214	7.49722	3	3	2	3	3	2	3	3	4	18.687
TGVEG_227280;TGGT1_227280;TGME49_227280	dense granule protein GRA3	HMM: MDRTICPFFIQSFTMSTALKRLIPFLVPFVVFLVAAALGGLAA, NN: MDRTICPFFIQSFTMSTALKRLIPFLVPFVVFLVAAALGGLAAD	2	31.2355	31.2569	31.2511	31.2155	30.8931	31.2489	31.1666	31.4879	31.2119			0.152023	-0.040973	35.462	160	24.3	10.4137	9.38759	9.49119	9.40116	9.46931	9.49475	9.49486	9.49552	9.48156	9.39922	9	8	9	8	10	8	9	9	10	24.18
TGVEG_227360;TGME49_227360;TGGT1_227360	ribosomal protein RPL3	N/A	0	30.5917	30.6676	30.4988	30.6088	31.5048	30.6267	30.5251	30.5835	30.5306			0.309712	0.0396729	70.332	189	53.5	10.2702	9.1819	9.23411	9.18367	9.331	9.70475	9.31063	9.31071	9.20175	8.98935	15	18	18	19	22	17	16	15	13	44.056
TGVEG_227600;TGME49_227600;TGGT1_227600	ribosomal protein RPL34	N/A	0	27.9627	28.3173	27.9807	28.0204	28.8853	28.1366	27.8237	27.9062	28.2149			0.252007	0.105296	11.935	38	24.6	9.48468	8.67127	8.39902	8.65772	8.37608	8.69823	8.51063	8.41606	8.58034	8.24596	5	3	4	3	3	4	4	4	3	15.383
TGGT1_227620;TGME49_227620;TGVEG_227620	dense granule protein GRA2	HMM: MFAVKHCLLVVAVGALVNVSVRAA, NN: MFAVKHCLLVVAVGALVNVSVRAA	0	32.2726	32.2124	32.2458	32.2253	31.7032	32.1794	32.0677	32.207	32.5523			0.0778671	-0.0320727	48.984	132	36.8	10.6904	9.70536	9.74651	9.74318	9.78205	9.67683	9.77612	9.74379	9.74221	9.69799	8	6	6	6	6	6	7	8	6	19.842
TGME49_227810;TGVEG_227810;TGGT1_227810	rhoptry kinase family protein ROP11 (incomplete catalytic triad)	HMM: MSSSRLVLVSKMVDSCARLACFCIGLFFCLAVWQHQAGHAY, NN: MSSSRLVLVSKMVDSCARLACFCIGLFFCLAVWQHQAG	0	26.6326	27.4352	27.453	26.828	27.146	26.9453	26.605	27.3828	NaN			0.143477	0.179695	22.361	28	21.1	9.14139	7.81463	8.23042	8.30352	8.15878	8.5519	7.77962	8.08375	8.36346	7.55008	3	2	3	3	5	5	4	3	3	58.034
TGVEG_227910;TGME49_227910;TGGT1_227910	hypothetical protein;putative vivax protein	N/A	0	NaN	NaN	NaN	25.7534	25.3465	25.3061	25.4325	NaN	NaN			0	NaN	7.9444	15	37.7	8.51457	6.97404	7.22932	7.03659	7.83319	7.7585	7.72002	7.74193	7.51456	7.37891	1	2	1	2	2	2	2	1	1	14.374
TGVEG_227948;TGGT1_227948;TGME49_227948	peptidase M16 inactive domain-containing protein	HMM: MRFSVVSAPMATPSTATGS, NN: MRFSVVSAPMATPSTATGS	0	26.235	26.9583	26.5701	26.3192	26.295	26.8683	NaN	26.1577	NaN			0	0.430099	43.248	47	25.3	8.94751	7.62966	8.27425	7.8192	8.24864	7.72921	8.12251	8.00805	8.06239	6.94225	5	9	6	7	5	6	7	7	2	142.66
TGVEG_227960;TGME49_227960;TGGT1_227960	PCI domain-containing protein	N/A	0	NaN	25.9655	NaN	NaN	NaN	NaN	NaN	NaN	NaN			0	NaN	7.3985	12	11.1	8.42682	7.4977	7.86292	7.56556	7.56121	7.77541	7.24524	7.0937	NaN	NaN	3	3	1	3	3	1	2	1	1	55.682
TGGT1_227970;TGVEG_227970;TGME49_227970	histone family DNA-binding protein	HMM: MQTLSLSLVLLVALSTSQ, NN: MQTLSLSLVLLVALSTSQ;HMM: MQTLSLSLVLLVVLSTSQ, NN: MQTLSLSLVLLVVLSTSQELLVAE	0	26.3399	26.1946	26.1521	26.0672	26.1989	26.0953	26.251	26.2216	26.4089			0.328906	-0.0650005	13.47	30	26.8	8.90723	7.93585	7.91843	7.62756	7.89052	8.13114	8.11621	8.05053	8.02309	7.53969	4	3	2	3	4	4	4	4	2	25.16
TGVEG_228000;TGME49_228000;TGGT1_228000	putative splicing factor 3A subunit 2;splicing factor 3A subunit 2, putative	N/A	0	NaN	NaN	NaN	23.3769	NaN	NaN	NaN	NaN	NaN			0	NaN	2.4907	1	7.4	7.12649	NaN	NaN	NaN	7.12649	NaN	NaN	NaN	NaN	NaN	0	0	0	1	0	0	0	0	0	27.858
TGME49_228170;TGVEG_228170;TGGT1_228170	inner membrane complex protein IMC2A	HMM: MERRTRPDVSPRWQARRIHFVWLTALAVPIFLLFPSLSLLESTSSAGCSGIQCFASFPGVAAG, NN: MERRTRPDVSPRWQARRIHFVWLTALAVPIFLLFPSLSL	1	27.5428	27.4213	27.4768	27.5742	27.0122	27.3063	27.5304	27.704	27.3073			0.100456	-0.0335986	52.831	84	18.5	9.2679	8.4068	8.35299	8.07188	8.54271	8.02243	8.17629	8.56754	8.28407	7.94664	11	12	9	13	9	10	13	13	9	170.81
TGVEG_228190;TGME49_228190;TGGT1_228190	eukaryotic initiation factor-3, subunit 5, putative;putative eukaryotic initiation factor-3, subunit 5	N/A	0	27.3458	27.2483	27.294	27.6407	27.1207	27.5797	27.5399	27.3179	27.1845			0.182357	-0.0514139	26.066	20	24.9	9.23917	8.28391	8.30816	8.29084	8.50172	8.26316	7.6413	8.39287	8.26145	8.22876	3	4	3	3	2	2	3	2	3	38.069
TGVEG_228210;TGME49_228210;TGGT1_228210	26S proteasome regulatory subunit	N/A	0	NaN	NaN	NaN	NaN	NaN	NaN	NaN	26.0552	NaN			0	NaN	12.698	11	16.3	8.53559	7.57206	NaN	6.62955	7.75331	8.16637	NaN	NaN	7.87937	7.35307	1	2	1	2	2	1	1	2	1	44.425
TGVEG_228290;TGME49_228290;TGGT1_228290	phospholipase/carboxylesterase	N/A	0	NaN	NaN	25.1808	25.3377	NaN	NaN	NaN	NaN	NaN			0	NaN	8.379	14	14.7	8.56238	7.761	NaN	7.61862	7.71209	8.04536	7.23691	7.22668	7.77016	7.01195	2	1	2	2	2	1	2	2	1	51.906
TGVEG_228360;TGME49_228360;TGGT1_228360	peptidyl-prolyl isomerase FKBP12, putative;putative peptidyl-prolyl isomerase FKBP12	HMM: MQTRSASRAAAAAAAGVCGE, NN: MQTRSASRAAAAAAAGVCGEEASETE	1	NaN	NaN	NaN	NaN	NaN	NaN	NaN	NaN	25.5173			0	NaN	6.6215	3	5.8	8.11481	NaN	NaN	NaN	NaN	NaN	7.66453	NaN	7.65794	7.58637	0	0	0	0	0	1	0	1	1	38.175
TGVEG_228470;TGME49_228470;TGGT1_228470	ribosomal protein RPL15	N/A	0	29.1437	29.0194	28.9051	29.1763	30.0701	29.0903	29.1176	29.162	28.7943			0.0046217	-0.0019029	16.857	92	33.7	9.80416	8.81197	8.82428	8.8007	8.89821	9.04466	8.83364	8.88044	8.80926	8.64101	7	6	7	6	5	5	6	5	6	24.325
TGVEG_228490;TGME49_228490;TGGT1_228490	hypothetical protein;p21-carboxy-terminal region-binding protein	N/A	0	23.1429	NaN	NaN	NaN	NaN	NaN	NaN	NaN	NaN			0	NaN	2.323	1	3.6	6.96672	6.96672	NaN	NaN	NaN	NaN	NaN	NaN	NaN	NaN	1	0	0	0	0	0	0	0	0	43.213
TGVEG_228630;TGME49_228630;TGGT1_228630	hypothetical protein;putative transmembrane protein	HMM: MAHSRERRSPSCLVSPLSPPTASGQ, NN: MAHSRERRSPSCLVSPLSPPTASGQ;N/A	1	NaN	NaN	NaN	NaN	23.1519	NaN	NaN	NaN	NaN			0	NaN	2.6113	2	4.9	7.31775	NaN	NaN	6.90302	NaN	7.10677	NaN	NaN	NaN	NaN	0	0	1	0	1	0	0	0	0	34.744
TGVEG_228760;TGGT1_228760;TGME49_228760	hypothetical protein	N/A	0	23.764	NaN	NaN	NaN	NaN	NaN	NaN	NaN	NaN			0	NaN	10.455	12	10.9	7.99281	7.15366	7.24135	6.59808	6.8172	NaN	7.55029	6.82696	6.88661	6.79457	1	3	1	1	0	2	1	1	1	49.276
TGVEG_229000;TGME49_229000;TGGT1_229000	kelch repeat-containing protein	N/A	0	NaN	NaN	NaN	23.4895	NaN	NaN	NaN	NaN	NaN			0	NaN	2.2561	1	2.3	7.16041	NaN	NaN	NaN	7.16041	NaN	NaN	NaN	NaN	NaN	0	0	0	1	0	0	0	0	0	68.112
TGGT1_229010;TGVEG_229010;TGME49_229010	rhoptry neck protein RON4	HMM: MAIKNTLTGSGLLVLLTLACGTTVQSS, NN: MAIKNTLTGSGLLVLLTLACGTTVQSS	0	28.2951	28.2932	28.1157	28.3186	28.6	28.3399	28.2383	28.4457	28.491			0.734791	-0.157014	90.686	86	38	9.55071	8.45491	8.65398	8.46419	8.62941	8.95792	8.48636	8.41149	8.591	8.37814	9	9	9	10	16	9	6	10	9	107.34
TGVEG_229140;TGME49_229140;TGGT1_229140	MaoC family domain-containing protein	N/A	0	NaN	NaN	NaN	NaN	NaN	NaN	25.0493	NaN	NaN			0	NaN	5.179	3	15.4	7.87951	7.22996	NaN	NaN	NaN	6.98632	NaN	7.62778	NaN	6.82362	1	0	0	0	1	0	3	0	1	35.939
TGVEG_229180;TGME49_229180;TGGT1_229180	HEAT repeat-containing protein	N/A	0	NaN	25.1799	NaN	NaN	NaN	NaN	NaN	NaN	NaN			0	NaN	24.054	12	8.2	8.33282	NaN	7.62643	NaN	NaN	NaN	8.04622	7.2033	7.39192	7.32276	0	3	0	0	0	3	2	2	4	136.16
TGVEG_229210;TGME49_229210;TGGT1_229210	putative small nuclear ribonucleoprotein polypeptide A';small nuclear ribonucleoprotein polypeptide A', putative	N/A	0	NaN	NaN	NaN	NaN	24.1946	NaN	NaN	NaN	NaN			0	NaN	3.0135	1	6.7	7.42063	NaN	NaN	NaN	NaN	7.42063	NaN	NaN	NaN	NaN	0	0	0	0	1	0	0	0	0	28.695
TGVEG_229250A;TGGT1_229250A;TGME49_229250	ribosomal protein RPL28	N/A	0	27.4529	27.5083	27.3035	27.4419	28.0783	27.3756	27.4675	27.4002	27.2449			0.219444	0.0506547	43.175	54	83.8	9.35713	8.2671	8.36732	8.36226	8.48458	8.72316	8.34437	8.42032	8.24959	8.11998	4	4	5	6	5	4	4	3	4	8.3447
TGME49_229360;TGGT1_229360;TGVEG_229360;TGVEG_439880	transaldolase	N/A	0	26.5236	26.4714	26.5394	26.9233	26.6227	26.5549	27.0574	26.631	26.8939			1.30036	-0.349333	33.644	37	24.7	9.05793	7.74341	8.06793	8.00509	8.53614	7.89369	8.29609	8.1574	7.79114	7.64391	3	4	3	6	3	8	5	3	3	61.447
TGVEG_229420;TGME49_229420;TGGT1_229420	cytochrome c, putative;putative cytochrome c	N/A	0	NaN	NaN	NaN	NaN	NaN	NaN	NaN	NaN	23.3258			0	NaN	4.0822	4	12.3	7.61984	6.96469	NaN	NaN	7.07726	NaN	7.08135	NaN	NaN	6.92666	1	0	0	1	0	1	0	0	1	18.1
TGGT1_229480;TGVEG_229480;TGME49_229480	calcium binding protein precursor, putative;putative calcium binding protein precursor	HMM: MAAFADRPTCRVSLGAVFLARELHRLRKSLPLCVFSLFLFSFAFSALSGA, NN: MAAFADRPTCRVSLGAVFLARELHRLRKSLPLCVFSLFLFSFAFSA	1	27.8784	27.8937	27.7627	26.9345	26.8281	27.3219	26.9943	NaN	NaN			0	0.850604	37.371	29	42.7	9.16726	8.46339	8.55456	8.37831	7.88709	8.27455	8.31433	7.91534	NaN	7.44542	6	9	6	3	3	4	4	0	1	38.277
TGVEG_229650;TGME49_229650;TGGT1_229650	josephin protein	N/A	0	NaN	NaN	NaN	NaN	NaN	NaN	NaN	24.4257	NaN			0	NaN	2.7111	4	3.9	7.67912	6.73887	NaN	NaN	6.86145	NaN	7.02268	NaN	7.38883	NaN	1	0	0	1	0	1	0	2	0	46.795
TGVEG_229670;TGME49_229670;TGGT1_229670	ribosomal protein RPS23	N/A	0	29.9023	29.738	29.8949	29.9349	30.5698	29.9524	29.983	30.0305	30.0355			1.42114	-0.17131	35.18	92	44.8	10.0658	9.08221	8.87605	9.10009	9.0876	9.36751	9.12169	9.20393	9.05565	8.90498	7	7	7	7	7	7	7	7	7	15.801
TGVEG_229920;TGME49_229920;TGGT1_229920	hypothetical protein;putative transmembrane protein	HMM: MATTARQLFLPFAGMRPVGAA, NN: MATTARQLFLPFAGMRPVGAA	1	NaN	NaN	NaN	NaN	NaN	NaN	NaN	22.785	NaN			0	NaN	6.2938	4	11.4	7.66543	6.77609	6.85905	6.87367	NaN	6.93329	NaN	6.96288	6.89492	NaN	1	1	1	0	1	0	1	1	0	34.951
TGVEG_229930;TGME49_229930;TGGT1_229930	p25-alpha family protein	N/A	0	NaN	25.2798	NaN	NaN	NaN	NaN	NaN	NaN	NaN			0	NaN	15.997	17	48.5	8.37051	7.2957	7.72846	7.4189	7.28747	7.18862	7.38468	7.37649	7.49948	7.31685	2	3	1	1	1	1	1	2	3	17.34
TGVEG_229950;TGME49_229950;TGGT1_229950	26S proteasome regulatory subunit 6b, putative;putative 26S proteasome regulatory subunit 6b	N/A	0	NaN	NaN	NaN	23.4392	NaN	NaN	NaN	NaN	NaN			0	NaN	15.636	3	19.8	7.37083	6.97836	NaN	NaN	7.14529	NaN	NaN	NaN	NaN	NaN	1	0	0	1	0	0	1	0	0	46.093
TGVEG_229990;TGME49_229990;TGGT1_229990	putative T-complex protein 1 subunit alpha;T-complex protein 1 subunit alpha, putative	N/A	0	28.5642	28.7681	28.7951	28.6569	28.3874	28.6943	28.9363	28.732	28.8331			0.594515	-0.124661	49.669	59	40.1	9.65162	8.50492	8.68041	8.65066	8.88833	8.72785	8.63964	8.81403	8.69475	8.5398	5	9	5	11	6	5	7	8	6	59.215
TGVEG_230160;TGME49_230160;TGGT1_230160	hypothetical protein	N/A	0	NaN	NaN	NaN	NaN	NaN	NaN	NaN	23.7282	NaN			0	NaN	3.8964	3	17.6	7.6995	NaN	NaN	6.7472	7.22963	NaN	7.09377	NaN	7.17886	NaN	0	0	1	1	0	1	0	1	0	15.845
TGGT1_230180;TGVEG_230180;TGME49_230180	hypothetical protein;putative transmembrane protein	HMM: MLQMARYTANICAVSICSLVLVVALSVGI, NN: MLQMARYTANICAVSICSLVLVVAL;HMM: MLQMARYTVNICAVSICSLVLVVALSV, NN: MLQMARYTVNICAVSICSLVLVVAL	1	NaN	NaN	NaN	24.9933	24.2327	24.5893	24.3926	24.7387	NaN			0	NaN	11.555	13	12.7	8.27298	7.00966	7.07397	NaN	7.50172	7.32356	7.7606	7.33391	7.37157	6.99444	1	1	0	2	2	3	2	2	1	57.302
TGVEG_230210;TGME49_230210;TGGT1_230210	alveolin domain containing intermediate filament IMC10	N/A	0	27.3204	NaN	27.5763	26.8982	26.4841	26.6702	NaN	26.769	26.4773			1.29185	0.825196	33.224	28	26.1	9.02808	8.44881	7.52143	8.40119	8.06442	8.20866	7.96008	7.56815	7.77164	7.55242	6	2	5	4	6	3	1	2	2	61.187
TGVEG_230380;TGME49_230380;TGGT1_230380	protein translocation complex, SEC61 gamma subunit	HMM: MTRERAQRLLCRLLDFFLGCAALSFVTSLLFASVSSW, NN: MTRERAQRLLCRLLDFFLGCAAL	3	NaN	24.5496	NaN	NaN	NaN	26.5731	26.494	NaN	25.7367			0	-1.56572	6.948	14	18.8	8.68511	7.46529	7.54486	7.51307	7.59959	7.64337	8.10421	8.02686	7.46935	7.60981	1	2	1	1	2	2	2	1	2	16.8
TGVEG_230410;TGME49_230410;TGGT1_230410	peroxiredoxin PRX3	N/A	0	26.2039	26.2721	26.1367	26.3247	25.9822	26.0896	26.1799	26.2796	26.2252			0.189003	-0.024004	20.893	28	30.7	8.90248	7.75906	7.95198	7.716	7.91526	8.06104	8.23664	8.09328	7.86782	7.51061	3	4	2	2	4	6	4	3	2	30.534
TGVEG_230420;TGME49_230420;TGGT1_230420	sarco/endoplasmic reticulum Ca2+-ATPase	N/A	7	NaN	25.4568	NaN	NaN	NaN	NaN	25.9541	26.0116	25.3893			0	-0.328192	18.497	18	11.6	8.8825	7.26543	7.6248	7.83781	8.09293	7.96252	8.28226	8.03447	7.9624	7.42254	1	2	2	2	2	2	5	2	2	118.88
TGVEG_230450;TGME49_230450;TGGT1_230450	bifunctional GMP synthase/glutamine amidotransferase protein	N/A	0	25.3716	25.3641	25.0674	25.1974	NaN	25.1397	25.3252	25.2637	25.2371			0.0248624	-0.00768916	15.551	25	16.9	8.53955	7.40466	8.01199	7.67896	7.31469	NaN	7.50594	7.50897	7.77068	7.42302	3	6	3	3	0	3	3	5	3	62.294
TGGT1_230510	hypothetical protein	HMM: MVSAPFSLRGHAAHDCVRFFFLWATLGVYVFLCCSASSAL, NN: MVSAPFSLRGHAAHDCVRFFFLWATLGVYVFLCCSASSAL	1	NaN	NaN	NaN	NaN	NaN	NaN	NaN	23.0079	NaN			0	NaN	2.4745	1	4.8	6.96204	NaN	NaN	NaN	NaN	NaN	NaN	NaN	6.96204	NaN	0	0	0	0	0	0	0	1	0	39.498
TGVEG_230520;TGME49_230520;TGGT1_230520	cyclophilin 1, putative;putative cyclophilin 1	N/A	0	26.7099	26.6893	26.5563	26.4567	26.3672	26.7409	26.5471	26.5132	26.4966			1.23837	0.132842	28.868	41	34.2	9.00436	8.08106	8.12814	7.92481	7.98313	8.15369	8.19866	7.94997	8.09311	7.78881	5	5	3	4	6	6	3	6	3	26.224
TGGT1_230940;TGME49_230940;TGVEG_230940	hypothetical protein	N/A	0	27.7686	28.1437	27.7381	27.9803	28.1071	27.9394	27.6381	26.6127	27.9054			0.528295	0.498072	63.139	76	18.6	9.4014	8.40676	8.44773	8.40669	8.47232	8.85082	8.4644	8.25532	7.92721	8.22414	10	8	7	8	16	9	8	6	6	155.22
TGVEG_230960;TGME49_230960;TGGT1_230960	putative splicing factor 3b, subunit 3;splicing factor 3b, subunit 3, putative	N/A	0	NaN	NaN	NaN	24.417	NaN	NaN	NaN	NaN	NaN			0	NaN	2.2527	2	2.4	7.97886	7.83079	NaN	NaN	7.4396	NaN	NaN	NaN	NaN	NaN	1	0	0	1	0	0	0	0	0	135.74
TGVEG_231080;TGME49_231080;TGGT1_231080	ribosomal protein RPL38	N/A	0	NaN	26.0939	NaN	25.8063	NaN	NaN	NaN	NaN	NaN			0	NaN	6.4371	22	33.3	8.72454	7.6963	7.87739	7.18256	7.88559	7.9157	7.78076	7.87276	7.72915	7.62571	3	2	1	2	2	2	1	2	2	9.5832
TGVEG_231140;TGME49_231140;TGGT1_231140;TGVEG_232500;TGME49_232500;TGGT1_232500	hypothetical protein;ribosomal protein RPS25	N/A	0	29.4392	29.6363	29.4565	29.7749	30.7595	29.4984	29.5241	29.6712	29.869			0.683031	-0.177454	40.639	128	47.2	9.99312	8.6837	8.85427	8.76293	9.13248	9.51679	8.94374	8.98136	8.88352	8.91439	8	10	9	11	11	9	10	8	10	18.682
TGVEG_231160;TGME49_231160;TGGT1_231160	hypothetical protein	N/A	0	NaN	NaN	NaN	NaN	NaN	NaN	NaN	25.4695	NaN			0	NaN	5.0921	6	10.7	8.50854	7.75956	7.7677	7.75535	7.7648	NaN	NaN	7.61134	7.70305	NaN	1	1	1	1	0	0	1	1	0	18.281
TGVEG_231190;TGME49_231190;TGGT1_231190	arsenite-activated ATPase family protein	N/A	0	NaN	NaN	NaN	NaN	NaN	NaN	NaN	NaN	24.1573			0	NaN	3.0221	7	4.3	7.98405	NaN	7.45003	7.35614	7.28407	NaN	NaN	7.05057	NaN	7.17699	0	1	1	1	0	1	1	1	1	44.049
[truncated: 608 more rows]

## Sheet: Base sensitive
Base sensitive	Protein IDs	Protein name	[SignalP Peptide]	[# TM Domains]	LFQ intensity NMTi0_1	LFQ intensity NMTi0_2	LFQ intensity NMTi0_3	LFQ intensity NMTi0.05_1	LFQ intensity NMTi0.05_2	LFQ intensity NMTi0.05_3	LFQ intensity NMTi0.5_1	LFQ intensity NMTi0.5_2	LFQ intensity NMTi0.5_3	MG_motif	Significant response to NMTi	Log10 t-test p value*(-1)	Log2 FC YnMyr/NMTi	Score	MS/MS Count	Sequence coverage [%]	Total Intensity	Intensity NMTi0_1	Intensity NMTi0_2	Intensity NMTi0_3	Intensity NMTi0.05_1	Intensity NMTi0.05_2	Intensity NMTi0.05_3	Intensity NMTi0.5_1	Intensity NMTi0.5_2	Intensity NMTi0.5_3	Razor + unique peptides NMTi0_1	Razor + unique peptides NMTi0_2	Razor + unique peptides NMTi0_3	Razor + unique peptides NMTi0.05_1	Razor + unique peptides NMTi0.05_2	Razor + unique peptides NMTi0.05_3	Razor + unique peptides NMTi0.5_1	Razor + unique peptides NMTi0.5_2	Razor + unique peptides NMTi0.5_3	Mol. weight [kDa]
[truncated: 49 more rows]

[truncated: 2 more sheets: Response Human, Human proteome]
