# Supplementary material for: Profiling of myristoylation in Toxoplasma gondii reveals an N-myristoylated protein important for host cell penetration
Source: eLife. 2020 Jul 3;9:e57861. doi: 10.7554/eLife.57861 (PMC7373427; doi:10.7554/eLife.57861)
Supplement: Supplementary file 4. — Myristoylated proteome of T. gondii. Sheet 1: Substrate list and annotation. Sheet 2: Myristoylated proteins in P. falciparum and their orthologues in Toxoplasma. Sheets 3–9: Substrate orthologues in selected Apicomplexans. [file elife-57861-supp4.xlsx]

## Sheet: Legend
Supplementary file 4: Myristoylated proteome of Toxoplasma gondii
To generate a comprehensive list of myristoylated proteins in Toxoplasma, we combined YnMyr enrichment with substrate response to NMT inhibition and the myristoylated peptide discovery. Substrates were further divided by the confidence level (high, medium and low).
Sheet 1: Substrate list and annotation
Substrates were annotated with LOPIT prediction for localization, GO and the phenotype score using ToxoDB (https://toxodb.org) as well as with orthology in selected Apicomplexans using EuPathDB (https://eupathdb.org). In addition, substrates were annotated with in silico prediction for myristoylation, palmitoylation predictor (CSS-Palm 4.0), the reported palmitoylation data from Toxoplasma and th…
Sheet 2: Myristoylated proteins in P. falciparum and their orthologs in Toxoplasma
Myristoylated substrates from P. falciparum reported in Wright et al. 2014 were converted to Toxoplasma orthologs using EuPathDB (https://eupathdb.org).
Sheets 3-9: Substrate orthologs in selected Apicomplexans
Substrates were converted to respective orthologs using EuPathDB (https://eupathdb.org). The presence of the MG motif is indicated.

## Sheet: Substrate List
Confidence level	Protein IDs	Uniprot entry	Protein name	MG motif	Capture reagent 1	Capture reagent 2	Capture reagent 3	Myr pep	Significant response to NMTi	Phenotype score (Sidik et al. 2016)	Predicted localization (Barylyuk et al. 2020)	In silico prediction for myristoylation (Alonso et al. 2019)	Palmitoylation predictor (CSS-Palm)	Palmitoylated (Foe et al. 2015)	Palmitoylated (Caballero et al. 2016)	P. falciparum myristoylated (Wright et al. 2014)	Plasmodium	Babesia	Cryptosporidium	Cyclospora	Eimeria	Hammondia	Neospora	[# TM Domains]	[SignalP Peptide]	[Curated GO Functions]	[Computed GO Functions]	[Curated GO Processes]	[Computed GO Processes]
High	TGGT1_267080	A0A125YSZ9	26S protease regulatory subunit 4, putative;putative 26S protease regulatory subunit 4	+	+	+	+		+	-4.66	19S proteasome					+	+	+	+	+	+	+	+	0	N/A	N/A	ATP binding, four-way junction helicase activity, hydrolase activity, microtubule-severing ATPase activity	N/A	DNA recombination, DNA repair, protein catabolic process
High	TGVEG_276140	V5B319	ADP ribosylation factor ARF1	+	+	+	+		+	-1.44	nucleus - chromatin				+	+	+	+	+		+	+	+	0	N/A	N/A	GTP binding	N/A	intracellular protein transport, small GTPase mediated signal transduction
High	TGGT1_261440	A0A125YNN4	ARM repeats containing protein	+	+	+	+	+	+	-2.1	rhoptries 2	+	+	+	+	+	+	+	+	+	+	+	+	0	N/A	N/A	protein binding	N/A	N/A
High	TGGT1_301440	S7UHK8	calcium-dependent protein kinase CDPK1	+	+	+	+	+	+	-3.3	nucleus - chromatin	+	+		+	+	+		+					0	N/A	N/A	ATP binding, calcium ion binding, calmodulin-dependent protein kinase activity, protein kinase activity	N/A	lipopolysaccharide biosynthetic process, protein phosphorylation
High	TGGT1_242070	A0A125YLM5	cAMP-dependent protein kinase regulatory subunit	+	+	+	+	+	+	-5.46	IMC		+	+	+	+	+	+	+	+	+	+	+	0	N/A	N/A	cAMP-dependent protein kinase regulator activity, cGMP-dependent protein kinase activity	N/A	regulation of protein phosphorylation
High	TGGT1_262450	S7WDX6	dyggve-melchior-clausen syndrome protein;hypothetical protein	+				+	+	-0.86	nucleus - chromatin	+	+									+	+	0	N/A	N/A	N/A	N/A	N/A
High	TGGT1_232815	S7V2V8	Erv1 / Alr family protein	+	+	+		+	+	-3.64	mitochondrion - soluble	+					+	+	+	+	+	+	+	0	N/A	N/A	thiol oxidase activity	N/A	oxidation-reduction process
High	TGGT1_223940	A0A125YXT6	GAP45;GAP45 protein	+	+	+	+	+	+	-4.14	IMC	+	+	+	+	+	+			+	+	+	+	0	N/A	N/A	N/A	N/A	N/A
High	TGGT1_233030	S7V3S7	gliding-associated protein GAP70	+	+	+	+		+	-0.19	apical 1	+	+									+	+	0	N/A	N/A	N/A	N/A	N/A
High	TGGT1_261980	S7W6J8	gorasp2-prov protein	+	+		+		+	-0.31	nucleolus	+				+	+	+	+	+		+	+	0	N/A	N/A	protein binding	N/A	N/A
High	TGGT1_235490	S7URK2	high-temperature-induced dauer-formation protein;hypothetical protein	+	+	+	+		+	-1.28	19S proteasome	+								+	+	+	+	1	N/A	N/A	N/A	N/A	N/A
High	TGGT1_261500	S7WE79	hydrolase	+	+	+	+		+	-0.09	nucleus - chromatin	+					+	+			+	+	+	0	N/A	N/A	N/A	N/A	N/A
High	TGGT1_249970	S7V0B0	hypothetical protein, acylated pleckstrin-homology domain-containing protein (APH)	+	+	+	+	+	+	-5.53	micronemes	+	+		+	+	+	+		+	+	+	+	0	N/A	N/A	N/A	N/A	N/A
High	TGGT1_313380	A0A125YKB3	hypothetical protein	+	+	+	+		+	-4.7	IMC	+		+	+	+	+	+	+	+	+	+	+	0	N/A	N/A	N/A	N/A	N/A
High	TGGT1_203160	S7WAS1	hypothetical protein	+	+		+		+	-0.7	nucleus - chromatin	+					+			+	+	+	+	0	N/A	N/A	N/A	N/A	N/A
High	TGGT1_277870	S7V0A4	hypothetical protein	+	+		+	+	+	-0.5	nucleolus	+					+	+		+	+	+	+	0	N/A	N/A	N/A	N/A	N/A
High	TGGT1_269990	S7V3Y2	hypothetical protein	+	+		+		+	-0.47	PM - peripheral 2	+	+							+	+	+	+	0	N/A	N/A	protein binding	N/A	N/A
High	TGGT1_264990	A0A125YMG3	hypothetical protein	+	+	+	+	+	+	-0.43											+	+	+	0	N/A	N/A	N/A	N/A	N/A
High	TGGT1_242570	S7W751	hypothetical protein	+	+	+	+		+	0.18	Golgi	+	+									+	+	0	N/A	N/A	binding	N/A	N/A
High	TGGT1_320760	S7UJ04	hypothetical protein	+	+	+	+		+	0.56	PM - peripheral 2	+								+	+	+	+	0	N/A	N/A	N/A	N/A	N/A
High	TGGT1_211630	S7VZ53	hypothetical protein	+	+	+	+		+	1.07	Golgi	+	+	+								+	+	0	N/A	N/A	N/A	N/A	N/A
High	TGGT1_232280	S7WBN4	hypothetical protein	+	+	+	+	+	+	1.22	PM - peripheral 1	+	+		+					+	+	+	+	0	N/A	N/A	N/A	N/A	N/A
High	TGGT1_214575	S7W5P8	hypothetical protein	+	+	+	+		+	2.62	PM - peripheral 1		+									+		0	N/A	N/A	N/A	N/A	N/A
High	TGGT1_293470	A0A125YZ06	hypothetical protein, immune mapped protein 1 (IMP1)	+	+	+	+	+	+	1.52	PM - peripheral 2	+	+		+					+	+	+	+	0	N/A	N/A	N/A	N/A	N/A
High	TGGT1_310930	S7W8Z1	hypothetical protein, Toxoplasma F-box protein 1	+	+	+		+	+	-3.02	PM - peripheral 2	+					+	+	+	+	+	+	+	0	N/A	N/A	N/A	N/A	N/A
High	TGGT1_260820	A0A125YZB3	IMC sub-compartment protein ISP1	+	+	+	+	+	+	0.36	apical 1	+	+		+	+	+		+	+	+	+	+	0	N/A	N/A	N/A	N/A	N/A
High	TGGT1_237820	A0A125YYM9	IMC sub-compartment protein ISP2	+	+	+	+		+	-2.04	IMC	+	+		+	+	+		+	+	+	+	+	0	N/A	N/A	N/A	N/A	N/A
High	TGGT1_316540	A0A125YUT4	IMC sub-compartment protein ISP3	+	+	+	+	+	+	-0.63	IMC	+	+	+	+	+	+	+		+	+	+	+	0	N/A	N/A	N/A	N/A	N/A
High	TGGT1_292120	S7W455	membrane occupation and recognition nexus protein MORN2	+	+	+	+		+	-0.04	PM - peripheral 2	+	+		+		+		+	+	+	+	+	0	N/A	N/A	N/A	N/A	N/A
High	TGGT1_261780	S7W715	microneme protein MIC7	+	+	+	+		+	-3.8	micronemes	+								+	+	+	+	1	N/A	N/A	calcium ion binding, protein binding	N/A	N/A
High	TGGT1_297150	S7UL00	MORN repeat-containing protein	+	+	+	+		+	-0.22	IMC	+	+	+	+					+	+	+	+	0	N/A	N/A	histone-lysine N-methyltransferase activity	N/A	N/A
High	TGGT1_313290	S7W874	MORN repeat-containing protein	+	+	+	+	+	+	0.13	PM - peripheral 2	+	+				+			+	+	+	+	0	N/A	N/A	histone-lysine N-methyltransferase activity	N/A	N/A
High	TGGT1_290200	S7VXT3	NAD/NADP octopine/nopaline dehydrogenase, alpha-helical domain-containing protein	+	+		+		+	-0.87	nucleus - non-chromatin		+		+					+	+	+	+	0	HMM: MGAPSPVAAGVAARTKSPLLTVCVCGGGNSAHAVAA, NN: MGAPSPVAAGVAARTKSPLLTV	N/A	coenzyme binding, oxidoreductase activity	N/A	oxidation-reduction process
High	TGGT1_245710	A0A125YN19	phosphatidylinositol-4-phosphate 5-kinase, putative;putative phosphatidylinositol-4-phosphate 5-kinase	+	+	+	+	+	+	1.15	IMC	+	+	+	+			+		+	+	+	+	0	N/A	N/A	histone-lysine N-methyltransferase activity	N/A	N/A
High	TGGT1_267100	S7VVP7	protein phosphatase 2C domain-containing protein	+	+	+	+		+	-1.3	cytosol	+	+			+	+	+	+	+	+	+	+	0	N/A	N/A	catalytic activity, phosphoprotein phosphatase activity	N/A	N/A
High	TGGT1_271380	S7WKB5	PUB domain-containing protein	+	+		+		+	0.05	PM - peripheral 2	+	+								+	+	+	0	N/A	N/A	protein binding	N/A	N/A
High	TGME49_207460	A0A125YXV4	Rab5B protein	+	+		+		+	0.55	PM - peripheral 2	+	+			+	+			+		+	+	0	N/A	N/A	GTP binding, GTPase activity	N/A	obsolete GTP catabolic process, protein transport, small GTPase mediated signal transduction
High	TGGT1_267440	A0A125YZS6	RING zinc finger protein	+	+		+		+	-0.35	nucleus - chromatin	+				+	+	+	+		+	+	+	0	N/A	N/A	protein binding, zinc ion binding	N/A	N/A
High	TGME49_299970	A0A125YGF8	tetratricopeptide repeat-containing protein	+	+		+		+	0.67	IMC		+			+	+			+	+	+	+	0	N/A	N/A	protein binding	N/A	N/A
High	TGGT1_209450	S7UJE0	TLD protein	+	+		+		+	-1.31	PM - peripheral 2	+								+	+	+	+	0	N/A	N/A	N/A	N/A	N/A
High	TGGT1_240630	S7US21	ULK kinase	+	+			+	+	1.73		+	+			+	+		+			+	+	0	N/A	N/A	ATP binding, calmodulin-dependent protein kinase activity, protein kinase activity	N/A	lipopolysaccharide biosynthetic process, protein phosphorylation
High	TGGT1_285190	S7UMY8	zinc finger, C3HC4 type (RING finger) domain-containing protein	+	+	+	+		+	1.09	cytosol	+										+	+	0	N/A	N/A	protein binding, zinc ion binding	N/A	N/A
Medium	TGGT1_262490	S7UYC4	alpha/beta hydrolase, putative;putative alpha/beta hydrolase	+	+		+	+		-1.2	Golgi	+				+	+	+	+	+	+	+	+	0	N/A	N/A	acylglycerol lipase activity	N/A	N/A
Medium	TGGT1_220320	S7VPC6	BSD domain-containing protein	+					+	-0.08	ER 2	+				+	+		+		+	+	+	0	N/A	N/A	N/A	N/A	N/A
Medium	TGGT1_305860	A0A125YQG3	calcium-dependent protein kinase CDPK3	+	+	+	+	+		-0.09	PM - peripheral 2	+	+		+	+	+	+	+	+	+	+	+	0	N/A	N/A	ATP binding, calcium ion binding, calmodulin-dependent protein kinase activity, protein kinase activity	N/A	protein phosphorylation
Medium	TGGT1_240550	S7W0A5	copper chaperone COX17-1, putative;putative copper chaperone COX17-1	+	+	+	+	+		-2.7	mitochondrion - soluble	+				+	+	+				+	+	0	N/A	N/A	copper chaperone activity	N/A	copper ion transport
Medium	TGGT1_319510	S7VSU2	hypothetical protein	+	+	+	+	+		-3.4	mitochondrion - membranes	+										+	+	0	N/A	N/A	N/A	N/A	N/A
Medium	TGGT1_219710	S7V1S4	hypothetical protein	+	+		+	+		-2.03	nucleus - chromatin	+								+		+	+	0	N/A	N/A	N/A	N/A	N/A
Medium	TGGT1_212210	S7WBM6	hypothetical protein	+	+	+		+		0.31	cytosol	+										+	+	0	N/A	N/A	N/A	N/A	N/A
Medium	TGGT1_265270	A0A125YZD3	hypothetical protein	+	+	+		+		0.4	Golgi	+	+									+	+	0	N/A	N/A	N/A	N/A	N/A
Medium	TGGT1_289615	S7VXP9	hypothetical protein	+	+	+		+		1.59	IMC		+									+		0	N/A	N/A	N/A	N/A	N/A
Medium	TGGT1_310420	S7UTB2	hypothetical protein	+	+	+	+	+		1.89	PM - peripheral 1	+	+	+								+	+	0	N/A	N/A	N/A	N/A	N/A
Medium	TGGT1_255245	S7V1Y6	hypothetical protein;putative transmembrane protein	+				+		-2.64						+	1	+			+	+	+	2	HMM: MGNLLSSLLPPRVHKRLNRLWTNSYWLVSTVAWVASTAAITLAA, NN: MGNLLSSLLPPRVHKRLNRLWTNSYWLVSTVAWVASTAAITLAA	N/A	N/A	N/A	N/A
Medium	TGGT1_309990	S7W7Z9	hypothetical protein;putative transmembrane protein	+	+			+		2.27	micronemes		+				+			+	+	+	+	4	HMM: MGNMCAICFNPGKAASCSCFNLAVAVLLFAVYYGLVGGM, NN: MGNMCAICFNPGKAASCSCFNLAVAVLLFAVYYGLVGGM	N/A	N/A	N/A	N/A
Medium	TGGT1_243800	S7VU20	long-chain fatty acid CoA ligase, putative;putative long-chain fatty acid CoA ligase	+	+	+	+	+		0.25	PM - peripheral 2	+					+	+	+	+	+	+	+	0	N/A	N/A	catalytic activity, long-chain fatty acid-CoA ligase activity	N/A	metabolic process
Medium	TGGT1_226700	S7UX03	nuclease, putative	+					+	0.17	Golgi	+	+									+	+	0	N/A	N/A	hydrolase activity, acting on ester bonds, nucleic acid binding	N/A	N/A
Medium	TGGT1_247690	S7V144	phospholipid-translocating P-type ATPase, flippase subfamily protein	+					+	-1.5	PM - peripheral 2	+					+	+	+	+	+	+	+	8	N/A	N/A	ATP binding, cation-transporting ATPase activity, magnesium ion binding, metal ion binding, nucleotide binding, phospholipid-translocating ATPase activity	N/A	cation transport, phospholipid transport
Medium	TGGT1_232340	S7WBN1	protein phosphatase 2C domain-containing protein	+	+	+	+	+		-0.25	cytosol	+				+	+	+	+	+	+	+	+	0	N/A	N/A	catalytic activity, phosphoprotein phosphatase activity	N/A	N/A
Medium	TGGT1_306660	S7UIG4	RNA pseudouridine synthase superfamily protein	+					+	-4.59	nucleus - chromatin	+	+					+		+	+	+	+	0	N/A	N/A	RNA binding, protein binding, pseudouridine synthase activity	N/A	pseudouridine synthesis
Medium	TGGT1_222960	S7UL25	SCY kinase-related protein (incomplete catalytic triad)	+					+	-0.56										+	+	+	+	0	N/A	N/A	ATP binding, protein kinase activity	N/A	protein phosphorylation
Medium	TGGT1_262390	S7UYB4	TLD protein	+	+	+	+	+		-2.15	nucleus - chromatin	+								+	+	+	+	0	N/A	N/A	N/A	N/A	N/A
Low	TGGT1_262860	A0A125YQL9	ADP-ribosylation factor family protein 1, putative;putative ADP-ribosylation factor family protein 1	+					+	-0.52		+				+	+			+	+	+	+	0	N/A	N/A	GTP binding	N/A	intracellular protein transport, small GTPase mediated signal transduction
Low	TGGT1_267280	S7VVG7	hypothetical protein	+					+	-0.86	PM - peripheral 2	+										+	+	0	N/A	N/A	N/A	N/A	N/A
Low	TGGT1_281580	S7UVM5	PP2C, putative	+	+	+	+			-1.06	PM - peripheral 2	+	+			+				+	+	+	+	0	N/A	N/A	catalytic activity, phosphoprotein phosphatase activity	N/A	N/A
Low	TGGT1_311360	S7UT18	protein kinase G AGC kinase family member PKG	+	+		+			-2.15	PM - peripheral 2	+	+				+	+	+	+	+	+	+	0	N/A	N/A	ATP binding, cGMP-dependent protein kinase activity, protein serine/threonine kinase activity	N/A	protein phosphorylation

## Sheet: Myristoylated in P.falciparum
Myristoylated in P.falciparum	Input Gene ID	Protein name (Toxoplasma)	Gene ID	Myristoylated in Toxoplasma
+	PF3D7_1020900	ADP ribosylation factor ARF1	TGGT1_276140	+
+	PF3D7_0920500	ADP-ribosylation factor family protein	TGGT1_291800	+
+	PF3D7_0414900	ARM repeats containing protein	TGGT1_261440	+
+	PF3D7_0217500	calcium-dependent protein kinase CDPK3	TGGT1_305860	+
+	PF3D7_0717500	calcium-dependent protein kinase CDPK1	TGGT1_301440	+
+	PF3D7_1223100	cAMP-dependent protein kinase regulatory subunit	TGGT1_242070	+
+	PF3D7_1222700	GAP45	TGGT1_223940	+
+	PF3D7_1017300	gorasp2-prov protein	TGGT1_261980	+
+	PF3D7_0414600	hypothetical protein	TGGT1_249970	+
+	PF3D7_0929600	hypothetical protein	TGGT1_313380	+
+	PF3D7_1011000	IMC sub-compartment protein ISP1	TGGT1_260820	+
+	PF3D7_1011000	IMC sub-compartment protein ISP2	TGGT1_237820	+
+	PF3D7_1460600	IMC sub-compartment protein ISP3	TGGT1_316540	+
+	PF3D7_1138500	protein phosphatase 2C domain-containing protein	TGGT1_232340	+
+	PF3D7_1138500	protein phosphatase 2C domain-containing protein	TGGT1_267100	+
+	PF3D7_1008400	putative 26S protease regulatory subunit 4	TGGT1_267080	+
+	PF3D7_0403800, PF3D7_0805000	putative alpha/beta hydrolase	TGGT1_262490	+
+	PF3D7_1025600	putative copper chaperone COX17-1	TGGT1_240550	+
+	PF3D7_1451700	putative protein phosphatase 2b regulatory subunit	TGGT1_213800	+
+	PF3D7_0524700	putative transmembrane protein	TGGT1_255245	+
+	PF3D7_1310600	Rab5B protein	TGGT1_207460B	+
+	PF3D7_0215100	RING zinc finger protein	TGGT1_267440	+
+	PF3D7_0601600	tetratricopeptide repeat-containing protein	TGGT1_299970	+
+	PF3D7_1450000	ULK kinase	TGGT1_240630	+
+	PF3D7_1034700	putative ADP-ribosylation factor family protein 1	TGGT1_262860
+	PF3D7_0423200	BSD domain-containing protein	TGGT1_220320
+	PF3D7_0217500, PF3D7_0717500	calcium-dependent protein kinase CDPK2A	TGGT1_206590
+	PF3D7_0217500, PF3D7_0717500	calcium-dependent protein kinase CDPK2B	TGGT1_242400
+	PF3D7_0217500, PF3D7_0717500	calcium-dependent protein kinase CDPK5	TGGT1_224950
+	PF3D7_1137300	cleft lip and palate transmembrane protein 1 (clptm1) protein	TGGT1_205240
+	PF3D7_1223100	cyclic nucleotide-binding domain-containing protein	TGGT1_311300
+	PF3D7_1328800	histone deacetylase SIR2	TGGT1_227020
+	PF3D7_0810300	protein phosphatase 2c containing protein	TGGT1_293450
+	PF3D7_1011000	putative IMC sub-compartment protein ISP1	TGGT1_291005
+	PF3D7_0810300	putative PP2C	TGGT1_272280
+	PF3D7_1310600	Rab5B protein	TGGT1_207460A
+	PF3D7_0816200	SNF7 family protein	TGGT1_220460
+	PF3D7_0906100	SNF7 family protein	TGGT1_315350

## Sheet: Plasmodium
Input Ortholog(s)	Organism	Gene ID	Protein name (Plasmodium)	MG	Predicted Protein Sequence
TGGT1_262490	P. falciparum 3D7	PF3D7_1120400	alpha/beta hydrolase fold domain containing protein, putative	-	MASYSKDSDLGECIKYVHLKEDKKEEDNLYSNDKDVEYFENLFDYEYDEDDEESTGGRRFGLTFFILGCMTICGFRGRMVKKMAFVPPIIKGYNIENDNKFIFHNSHHEEIKELMQINNIDINYKKLKRGSTEVSVIMLYKKPLDLNKQTILYSHGNTTDIGYMTPFLLNLVTSNNVNVFSYDYSGYGLSNKDPSEKNCYKSIKMSYDYLTKDLNIKPENIIVYGHSLGSATSCYLINLKNVKVGGCILQSPLYSGLRLLLPLDYKKEMPWFDVFKNDKRLKNIPLLPLFIMHGKNDRDIPYQHSEYLLKIVKKNFAKKVQKNKSQFLRNKKINHLDVHDSILRFWGVENADHNDIDEKNPELFYHKLGEFLSYCSKFNMNE
TGGT1_243800	P. falciparum 3D7	PF3D7_0525100	acyl-CoA synthetase	-	MDNGNNEILYSVKISEPRDKNSTGIYRHPEYKDKLCENFDDKKFNNMWEVFDRVSTKFKERDCMGVREKLEDNKRGAYQWKNFGEVKELIMKVGSGLLNMNACPLIMCDDQRIPKARFLGLYMPNCPEWNICDLGCNAYNIITVPLYDSLGPQSSRFILDQTQMETIVCDKTCARNLFKSLETCEEIYLKTLILVDEIDDEIKKECSKYNLKIILWEELIKQGEKKIVKVPQGALNNIFSICYTSGTTGYPKGVIMTNRNFIGILAAAYIGPSRLPDLCINENDIHISYLPLAHIYERLMIYLFMAHGVKVGYYSGNVQTLLEDIQELKPTLFISVPRLYNRIHERIFNSLKKKSGLVQSLFNKGLQNKIKRLSSSGSTTHVLWDKLLFNKAKKILGGH…
TGGT1_311360	P. falciparum 3D7	PF3D7_1436600	cGMP-dependent protein kinase	-	MEEDDNLKKGNERNKKKAIFSNDDFTGEDSLMEDHLELREKLSEDIDMIKTSLKNNLVCSTLNDNEILTLSNYMQFFVFKSGNLVIKQGEKGSYFFIINSGKFDVYVNDKKVKTMGKGSSFGEAALIHNTQRSATIIAETDGTLWGVQRSTFRATLKQLSNRNFNENRTFIDSVSVFDMLTEAQKNMITNACVIQNFKSGETIVKQGDYGDVLYILKEGKATVYINDEEIRVLEKGSYFGERALLYDEPRSATIIAKEPTACASICRKLLNIVLGNLQVVLFRNIMTEALQQSEIFKQFSGDQLNDLADTAIVRDYPANYNILHKDKVKSVKYIIVLEGKVELFLDDTSIGILSRGMSFGDQYVLNQKQPFKHTIKSLEVCKIALITETCLADCLGNNN…
TGGT1_299970	P. falciparum 3D7	PF3D7_0631000	tetratricopeptide repeat protein, putative	+	MGAFGSKNLEYYNYASMKLLEVENYENDEELYFKEHDIDEIIKKARDIRNCNYKESLDLYFKALKILKKLKDNNNNKIYKNILEFEIRPQELKNKSIKLNTHCIKHNDHNNKDQLGSNSTLSDEKNICINKQIASLYNEIGDLCCIHDFMDKSLYYYDKACSYNPSKIEYIYKKGVLYQQMNNTEKAIKTFKLILSNDESHIPTLFSLGNLYRYIDNNIALSYFEAILKKEPDNTEVLSLIASCYDNLGKINEAISYQNKAVQIDPDNFNHKKFAQRLIEMKSQN
TGGT1_299970	P. falciparum 3D7	PF3D7_0601600	tetratricopeptide repeat protein, putative	+	MGAFGSKNLEYYNYASMKLLEVENYENDEELYFKEHDIDEIIKKARDIRNCNYKESLDLYFKALKILKKLKDNNNNNKIYKNILEFEIRPQELKNKSIKLNTHCIKHNDHNNKDQLGSNSTLSDEKNICINKQIASLYNEIGDLCCIHDFIDKSLYYYDKACSYNPSKIEYIYKKGVLYQQMNNTEKAIKTFKLILSNDESHIPTLFSLGNLYRYIDNNIALSYFEAILKKEPDNTEVLSLIASCYDNLGKINEAISYQNKAVQIDPDNFNHKKFAQRLIEMKSQN
TGGT1_261980	P. falciparum 3D7	PF3D7_1017300	golgi re-assembly stacking protein 1, golgi re-assembly stacking protein 2	+	MGAGQTKEIMGGYRILRISENSPCSNVGLEIFFDYIIQIDDLKLLDSSKRTYDNFIEKIKLHENKELTLDIYNCRYDKIKKVKVIPGKWEGNGLLGIHISYEFLNALNEGVRILEILENSPAYQSQLIEYEDFIIGYDKGIFRNQDEFMSYINMNNIIKENSHDKKVLFNTILYVYNYKHENIRKVQIQLNDSWGGKGLLGCNVATGYLHKIPPCQIKDKEEKENINLKESFSSSHIKNNESESNNYKKEHMDITKVNDLEIVLLNDSVGKNTNNINNTESNEKNSTNIIPLWKNEAEKSGREDKNYINSQDVELNHDNNIKYMKNDSNSNSHSSNGSSKTLEVDMDNNAETINYDDKFSYELKSTLDDQPEEDMHEIKKENFQNEQVILEDIKREEPN…
TGGT1_232340;TGGT1_267100	P. falciparum 3D7	PF3D7_1138500	protein phosphatase PPM2	+	MGAYLSSPKTNKESLDGGNLELDPSRYGLSCMQGWRKNMEDAHICYNNLKFNEIEEDVSIYGVFDGHGGPNVSKWISYNFRRIFIRCLKEANEEMIKKNMKRSENYKLKLIKLTLEKTFLKLDEEMLLSENQEKLKKYSVPTQEDEEESDTRENYIYSILNDIISKNISIKAIEKDGKRCLQVVYNKDGSPVEEGNTDGSATSTLNQDQPEHNQLYEDGNDNNNSNNNNNNNNNNISPNLYGTNGENILRSDENYDSSNLNLGDNQDRKNYDDIENLGDNNNSSNDMLKKDDASSDILTATTSTNDMKDEDKKNNYLVEKNEHMKKENNNCEENSEQNKQVNGMSSYNKALIEGAMGESIDEKGLLNLNDIKTNNILIDNNNDSNNNNNNNNNNNNSSS…
TGGT1_305860	P. falciparum 3D7	PF3D7_0217500	calcium-dependent protein kinase 1	+	MGCSQSSNVKDFKTRRSKFTNGNNYGKSGNNKNSEDLAINPGMYVRKKEGKIGESYFKVRKLGSGAYGEVLLCREKHGHGEKAIKVIKKSQFDKMKYSITNKIECDDKIHEEIYNEISLLKSLDHPNIIKLFDVFEDKKYFYLVTEFYEGGELFEQIINRHKFDECDAANIMKQILSGICYLHKHNIVHRDIKPENILLENKHSLLNIKIVDFGLSSFFSKDNKLRDRLGTAYYIAPEVLRKKYNEKCDVWSCGVILYILLCGYPPFGGQNDQDIIKKVEKGKYYFDFNDWKNISEEAKELIKLMLTYDYNKRITAKEALNSKWIKKYANNINKSDQKTLCGALSNMRKFEGSQKLAQAAILFIGSKLTTLEERKELTDIFKKLDKNGDGQLDKKELIE…
TGGT1_207460B	P. falciparum 3D7	PF3D7_1310600	ras-related protein Rab-5B	+	MGCSSSTERLTSTKNINIVTSPAQQQKKNAQDTKVKIVLLGDSGVGKSSIALYLCHGRFSEKHQVTIGAAFLHHNIELKNGATMKLHIWDTGGQERFRSMAPLYYRDAYGAVVVYDSNNVESFDSLKYWINEIKSNGPRNCCIMVVANKKDLPQKLNSEMVMKFCEQENVSFIECSAKTGENITTLFEKLASRIYSRFKEVLYYNNP
TGGT1_267440	P. falciparum 3D7	PF3D7_0215100	RING zinc finger protein, putative	+	MGIMGSSLSNNRDDYYDDGPQTISFDNPIINRTNNTNLCELISQGPNINIQRTSVVRNSLNLRRKTLKIINVGNNNYLINFIFDALHDVEVSIYFCCKEELTEAKETIYCPTKYQTITKIFPKNLNQVYMSELNEGINLNNMNINDIKCKPSYEYIIPILIVLKAIGTPILQAQYNYAYLQENQMNENKNNQDKYKIILYRQKIQFGNRSFEVQEIFGIEKSPETKTDPVNNYLSDRECVICLTDEKDTAILPCRHMCLCNVCANVVRMQNTKCPICRQEVQGLLQISIDKKDKNVNS
TGGT1_262860	P. falciparum 3D7	PF3D7_1034700	ADP-ribosylation factor, putative	+	MGLIFSSIFSRLFSNKEVRILILGLDNAGKTTILNRLQLGEVIQTIPTIGFNVETVNYKNLKLQVWDLGGQSSIRPYWRCYYKNTNAIIYVIDSSDSERLNSTKYEINMILKEIDLEGVLLVIFANKQDIQNALSIAQISKDLNLTSIRDRQWAIFSTSATKNIGITEALDWLVNNIK
TGGT1_276140	P. falciparum 3D7	PF3D7_1020900	ADP-ribosylation factor	+	MGLYVSRLFNRLFQKKDVRILMVGLDAAGKTTILYKVKLGEVVTTIPTIGFNVETVEFRNISFTVWDVGGQDKIRPLWRHYYSNTDGLIFVVDSNDRERIDDAREELHRMINEEELKDAIILVFANKQDLPNAMSAAEVTEKLHLNTIRERNWFIQSTCATRGDGLYEGFDWLTTHLNNAK
TGGT1_240550	P. falciparum 3D7	PF3D7_1025600	cytochrome c oxidase copper chaperone, putative	+	MGMSLNKPINNTNEANKGEVKKKKICCVCLETKKLRDECIVKLGEEQCKKFIDDHNKCLRSEGFDIK
TGGT1_262490	P. falciparum 3D7	PF3D7_0403800	alpha/beta hydrolase, putative	+	MGNALNQLIFRPHPPSYSKNRKNLHFIKTKHGSTICGIFLNNNAHLTILFSHGNAEDIGDIVPQFESKLKRLGLNMFAYDYSGYGQSTGYPTETHLYNDVEAAYNYLISELNISKECIIAYGRSLGSAASVHIATKRDLLGLVLQCPLSSIHRVKLRLKFTLPYDLFCNIDKVHLIKCPILFIHGKKDKLLSYHGTEEMITKTKVNTYFMFIDEGGHNNLDSCFGNKMTAALVTFLFVLKNNIRENVNSVYDISNINTQKLRNMFILNNTEKLKDKLKEKIGDKEEKKDLTSKIKKNEKVIINNKIPKIKKDVNSYYYSSMEGIGSSTQNICKVQSSTESSYNSLTSVSTILASIESIMKGIPDSNTLCEKNSVQRNNNIKKNNSSNEIYSDCNPGYNY…
TGGT1_203160	P. falciparum 3D7	PF3D7_1415100	conserved protein, unknown function	+	MGNAMYAKSVYSSEGSEIFSENLSKEKRSEKSIHKMEYINDKEYKEDEYILNVYNKENKNIQDMNNEKINSGMKLKYDMNKNNLYVILSKKKRVKRFNPSTCLLRNCIYYVNCKINDKYFPILLELKNNPKCAICLIDESCNIIKEILIKDIKTIESSINSINLFLKINPEYSIQNKFNLIRFILKDNNDKISFMDNIKMMYGIEILEYGIVKYNKIRTQEYEEIYVYEKNLLNKENNQNLKHIMDNVTYNEYYNISDLITENENTHEKKMNQIIKNLIQLGNKYNPIIILGDMEEGNIIRVKEINALSNRTTNHYSSKDKQISFQQNYNSYDDFTLVEWYLSTKIGSNKTFRKEPIYSSNKLLLKSFMIGHFIKVKLSKNTFIKNKKTFVTSISIKGP…
TGGT1_305860	P. falciparum 3D7	PF3D7_0610600	calcium-dependent protein kinase 2	+	MGNHLSVNKLKRKKKKKSFLNIYGKNTNENTSKQSNDYKYDINTSCISREGTTTLERKNLILCHSGKLEDKYIIDEKLGQGTYGCVYKGIDKVTNQLYAIKEEKKDRLKNINRFFQEIEIMKKLDHPNIVKLYETYENDNYIYLIMELCSGRELFDSIIENGSFTEKNAATIMKQIFSAIFYLHSLNIVHRDLKPENFLFQSENKDSLLKIIDFGLSKNLGTGEFTTTKAGTPYYVAPQVLDGKYDKKCDIWSSGVIMYTLLCGYPPFYGDTDNEVLKKVKKGEFCFYENDWGSISSDAKNLITKLLTYNPNERCTIEEALNHPWITQMTKSHEHVELSSTLLKNLKNFKKENELKKIALTIIAKHLCDVEINNLRNIFIALDVDNSGTLSSQEILDGL…
TGGT1_232815	P. falciparum 3D7	PF3D7_1002500	conserved protein, unknown function	+	MGNIIPFKTFEEKDTKTKDLINDEKYLNIDNPKDVVSTMKQHNSIKNNSSMEQNENNIKHELEKIKNENFYLFDDSLDSNNMKHPCHAQWFLFWVFASYLNEKFSDTEKENVHAFYSNFPEQCIRGKGKNCFSDFLKIYPIRAGTREELMMWLQMCENYCRKKADLPVKVFNYGKLLKRWRYDDDYI
TGGT1_237820;TGGT1_260820	P. falciparum 3D7	PF3D7_1011000	inner membrane complex sub-compartment protein 1	+	MGNIVSCCSLDENKKYLNDDEILETFSNSEINEFKKRLKNNIQIVVLLQDGTKLPCNLQANFQEKTLCISCHQKVRMINFSDIRSLLYGEEQLKRVETQANLINDNCCLALHLDDSGNCIPIKFGSVKEKNLFIFIMKDYKKNS
TGGT1_223940	P. falciparum 3D7	PF3D7_1222700	glideosome-associated protein 45	+	MGNKCSRSKVKEPKRKDIDELAERENLKKQSEEIIEEKPEEVVEQVEETHEEPLEQEQELDEQKIEEEEEEPEQVPKEEIDYATQENKSFEEKHLEDLERSNSDIYSESQKFDNASDKLETGTQLTLSTEATGAVQQITKLSEPAHEESIYFTYRSVTPCDMNKLDETAKVFSRRCGCDLGERHDENACKICRKIDLSDTPLLS
TGGT1_220320	P. falciparum 3D7	PF3D7_0423200	BSD-domain protein, putative	+	MGNKHNKKKYELCEIQYEEKDFQLKYPWNEIIKWGSDDLNVDINIKIVKKVIEEIKDITLDEESFFNITEGKDIQSFHFEDKYVLWATALLKDIPNLKKIRYNIVPKYINENEFWLRYFSSIKMIIIKNFFETMQN
TGGT1_316540	P. falciparum 3D7	PF3D7_1460600	inner membrane complex sub-compartment protein 3	+	MGNLCCSNNDIKNSKSNIDIFQDNEIYGDNENWTLENWINKYKSGNSIKVAFPDGNEIQCNFRIFFKEKYFELSLDNKVRVIKFNDINCILHRNSCETLLESEQNLLKSPKVIGIRLISTLKAIAFSMDSPGEARIFNDFLQKYCLNA
TGGT1_261440	P. falciparum 3D7	PF3D7_0414900	armadillo-domain containing rhoptry protein	+	MGNNCCAGRDLLYKNKLQEFGIEGSKTIRKLLSFTSNDILRFDKAYDENDVQEFVNLCSSTCEIEKLEDRMHPWAADPKTIGALSATQLAILASKENEPHYKDAIREANGIAVFINLLKSHELDRVHAAVVALSFLSVDNVKNCICMFESGALPYLISGMKSNIDGMKAACAQTCRNIFVLDKKYKKEFLKLGGITQLVNLLELPSNYDDSQPLYTQLEAIYHLEDFILNDGDEIPEFLEAVKNSNSIKNLKTLQQCPEQDLAEASNVLLLRLTD
TGGT1_310930	P. falciparum 3D7	PF3D7_0619700	conserved protein, unknown function	+	MGNTISERKQRQFVLYKDIKNKIKKRNHLDIKNNLYISNLHEKKLITYNDEIFELYETYEEDGQKKEYMSDTENKKNYDIKINFKNDKKKNISLNKCDNQYDKQYDKHYYEKDIYEYNKMNTNSVKEKKNDKMFFEFDYGSFYNVEERSSTFEKDQKKPKNYSNIYEENKITKKKYELDKDSLDIKKKHINNLNYENEKKTEKKNSKSTMLKKKKKNSKSDNVDINNMVQNKTVIYNDNEKKIYTINDKDYNKMDQLNMQKNNNDNNNIIHNSSTYKSVHLRNISDYKCKIKCNNNIQNEHKHYIYNNEDTNNENKSVKKFFMLIKNNKNILQNILSFLNCSDLLNFQKTCSTTYICISDFLDYICLHIYSKFKNKYDNYFEPFNYFYKYEYLYTDNPS…
TGGT1_261500	P. falciparum 3D7	PF3D7_0728700	alpha/beta hydrolase, putative	+	MGNTLSNSTLFRPTEPSYDDELKNLVYIPELMNIDVNKFWNDKTYEIFNKEENIKELHNKKFPALFLYYTKDVKTKHTIMYFHSNSCDLGQIYDELNHLHEHLHANILAIEYIGFGLCYLEGSTNQYNINRRALAAYNFLKSLNIKNENILLFGRSIGTGVASKLAYNLKLIGVSVAGIILHSPYISIEKLVEDYFTYSSYFIENIYDNYKNLSFLSNNTDSDIPILLIHGKEDEIIHVSHSEYLMKNLNNKFKHASYPTDSYHNYYYVIDDLGIPIKIFLETLSKSKNAKSVDINIPKVYFYRELIYYRINGLDETFKRLNEDEKNKNTNDKKTTKGESSKDICSIDKLTKKRDSKKKDKKEKSTNITCTNIINNNSSNDLSIQNITNANIKNKEQEY…
TGGT1_267080	P. falciparum 3D7	PF3D7_1008400	26S protease regulatory subunit 4, putative	+	MGNTPGGMNNPYGFLGKKEDKDKGKDKDKEKKKLESVPISHMGKKKKKNKGTSGHSKLPNVTPNTKCRLKLLKLERIKDYLLLEEEYITNQEQIKSSDDKNYVKLKIDDLRGSPVSVGTLEELIDENHGIIATSVGPEYYVNILSFVDKDLLEPGCSVLLNNKTNSVVGILLDEVDPLVSVMKVEKAPLESYADIGGLESQIQEIKEAVELPLTHPELYEDIGIKPPKGVILYGPPGTGKTLLAKAVANETSATFLRVVGSELIQKYLGDGPKLVREMFKVAEEHAPSIVFIDEIDAVGTKRYEATSGGEREIQRTMLELLNQLDGFDSRGDVKVIMATNRIDSLDPALIRPGRIDRKIQLPNPDTKTKRRIFQIHTSKMTMSPDVDLEEFVMSKDELS…
TGGT1_249970	P. falciparum 3D7	PF3D7_0414600	acylated pleckstrin-homology domain-containing protein, putative	+	MGNTVPYNCYERWGKRTPDGPLLNYDPQMPNSGTLSVLLENFDYESTEESNNKCEYIINKEPIEKNNNMNPKVIRNARRRPTYSPTARKINIQSDDEEEDEDDDEKLSTDDSDENISAKDIKDEKIQQYRKTLTKIVKIKTAIFHETVKVTCSKDGKMLEWYKGKNDSDGKKKPIGSFPLNKITSIRTKVDNLKSLEISVSSVHISTYLFTFKTREERESWQNNLESFRKIMSMK
TGGT1_242070	P. falciparum 3D7	PF3D7_1223100	cAMP-dependent protein kinase regulatory subunit	+	MGNVCTWRQGKEKAGDDNSQVIKDKELQNEFKTFEQKMRSNKKNAHEGDMNNDGEDDRYKFSRGFSLSKKPSKTKIPITKTDSEILDGLDYSEMSKQVLMTLNKKNILNDDGSSDGNDTDVHSMFDRKEIERKVLDLESIHFIQKKRLSVSAEAYGDWNKKIDNFIPKVYKKDEKEKAKIREALNESFLFNHLNKKEFEIIVNAFFDKNVEKGVNIINEGDYGDLLYVIDQGEVEIYKTKENNKKEVLTVLKSKDVFGELALLYNSKRAATATALTKCHLWALDRESFTYIIKDMVAKKRKMYEDILSHVNILKDMDPYERCKVADCLKSKSYNDGEIIIKEGEEGDTFFILIDGNAVASKDNKVIKTYTKGDYFGELALLKNKPRAATIKAQNFCQVV…
TGGT1_262490	P. falciparum 3D7	PF3D7_0805000	alpha/beta hydrolase, putative	+	MGNVLNRIIFNGPTEGYYEKFDLDFIYIETENNEKVAAHFINRNAPLTILFCHGNGENVYMLYDYFYETSKIWNVNVFLYDYLGYGESTGTASEKNMYLSGNAVYDYMVNTLKINPNSIVLYGKSIGSCAAVDIAIKRKVKGLILQSAILSLLNICFKTRFIFPFDSFCNIKRIKLIPCFVFFIHGTDDKIVPFYHGMCLYEKCKFKVHPYWVVDGKHNDIELIENERFNENVKSFLNFLYNSDL
TGGT1_301440	P. falciparum 3D7	PF3D7_0717500	calcium-dependent protein kinase 4	+	MGQEVSSVNNTKNEHHKTNKKSLKGGNERHEMKESSVGISKKIVENSFNNSKLRPGMFIQNSNVVFNEQYKGIKILGKGSFGEVILSRDKHTGHEYAIKVISKKHVKRKTDKESLLREVELLKMLDHINIMKLYEFFEDNNYYYLVSDVYTGGELFDEIISRKRFYEIDAARIIKQILSGITYMHKNNVVHRDLKPENILLETKNKEDMIIKIIDFGLSTHFEYSKKMKDKIGTAYYIAPDVLHGTYDEKCDIWSCGVILYILLSGCPPFNGSNEYDILKKVEAGKYTFDLPQFKKISDKAKDLIKKMLMYTSAVRISARDALEHEWIKMMTSKDNLNIDIPSLELSIANIRQFQSTQKLAQAALLYMGSKLTTIDETKELTKIFKKMDKNGDGQLDRN…
TGGT1_313380	P. falciparum 3D7	PF3D7_0929600	G2 protein, putative	+	MGQISSKEDEIEKQNIYATYPGLEQQLDMVFACHDISKQGKLSYKTVEMILRHFLMQCGFMEYVCRFVDENGTLDLKHVSNYLSIKKLMYKLKCCGESMLTLDEMKELVIIFLKKISDTYTEDQTKWLEQMKSSQEQQDKALEEAMYKYEKNILFHHAVKEQQILQNDKKLNEWNENVENAYEAQQEILRQFESSRKKNIDISLEKNNELIIAKDYIDKIKEAATDNKYDNSKCFIYPASSAPCGACTSAGAIIHHRRYKEKRRKKEYSLCL
TGGT1_240630	P. falciparum 3D7	PF3D7_1450000	serine/threonine protein kinase, putative	+	MGSTISKRKNNTDKNVKDESVENKRQKKNEENDSNLEFIKKYKIINKIGDGNFSKVFCCRGENKKKCAMKLMCCPLKKTSHYNCFKRELFIMKTINNKHPYIVKILDYHEKIWKKYYIVKLILEYCEGGNLFEYIKINGSCTHSEARVIIIKLTKTIQYINSLKIMHRDIKPENILLRTKDNIKSVVLSDFGLAKITPSNQSVVKSRSVCGSDFYLAPEIIKNKEYGIKIDIWSLGVLIFFIITGKVPFTGKNANELYNNILKANIPELLSKEKSLNIQPGLKNLLENILVHDPDQRFSCADILNHRWIRGTLTSCEFKIFNSASYIKKLRLDKKKASYDEEAKDNQIKDKSFENEKDSFANKKKRYTFFLKKITN
TGGT1_255245	P. falciparum 3D7	PF3D7_0524700	mitochondrial import receptor subunit TOM22, putative	+	MGTALSKIITINEENRLVISNKPVFQLAHKDAIRMRNKLRVAKNRINNFLKKSIKTTSWVVWIAGVSVVVLVTPIAFQYEKECQLFEMQAQFFQAQQAANVPQLN
TGGT1_309990	P. falciparum 3D7	PF3D7_1011500	conserved protein, unknown function	+	MGWFGKMEKCCCFPLAGGCLGGAMFHFMICITSIFSTTKDYKNMTIASNAILGCLIVLGLVLKNFIVLYIVALFVAFLLGIYIIIFVFLVIALFAANNMPFQHKLLTALTVLIIVLITASFLNIYISTCRVIKSGGTGWEYKSYMEIEKEKQIENKEKQNQKKKEDAMLNNDYNA
TGGT1_292120	P. falciparum 3D7	PF3D7_0110600	phosphatidylinositol-4-phosphate 5-kinase	-	MKCTSVNIRNVLDISLKKKIKENTNLSDDEIIIIYKRFNYISSNGKLNYDNFEKSLGILGSIQNAYLYKSIFKAFDLNNDNYLDFYEFCVAINIMLKGNKKDKLKLSYRIVNAGFNSNEDACVHKSSCMVNKFNTKEDNNMNGDNINGDNNNNHNNINGDNNNNHNNINGDNNNNNHNNINGDNNNNHNNINGDNNNNNHNNINGDNNNNHNNINGDNNNNHNNSHNNNSHNNNNKAENSLGQPLNEKNINDPINKHRNSQSIIYNINDEYNEKIKKNKKQDYSNYITYENFEKIVLSINDIKRQLLGTGDEIITSQIKYTFRSLSILCDDGIYRMNFECYKKALKCNEFLKLLGIHTKVADVFLQHELLKRKDKNKTKNGTMRNRKKYKNDSNRIANH…
TGGT1_277870	P. falciparum 3D7	PF3D7_0528300	conserved protein, unknown function	-	MKEPDDNSNDLIIHSFEEDIWKLYKKDNYMKHCIVRDSIEPIALDEEIHILKKEEGPTFKLSEILESLENKKEEEEAKSDISSLEYIEHEKKEEEEDKGKLYNGVYLHEVNIIENIKYSDCNKIYDENIFPISIIGDMYINNIIQFKDNSPYHSIYKVHKVEWFLSIDINEDTIYEIIPFSVGKNIQIPFESLGKYIFCKAYRRIYKNNQSKEKDANTVFDPHTYVNKPVRFKCSTEYIEKYSLSCKGPVLISIDLAFKVLTYLCAHFYSTKMNLHDPLNNVRTLFSSSNIKEKKKVQDKEEAVEEEDDNMTYTTSSVSQNDEGGYEIYITNMTINFDEIKFIFLDILDKKDKISTSHRDNNNNDSNNIRYNSLEKKELIFNLYEVEFRISNNNDGIII…
TGGT1_305860	P. falciparum 3D7	PF3D7_1337800	calcium-dependent protein kinase 5	-	MKETEVEDMDTNRKDGKIKKKEKIVNMKNEEVKSTTKSTLADSDEDYSIITLCTKCLSKKLEDNKNRIILDSKAFKDNRLKGRCSVSSNEDPLDNKLNLSPYFDRSQIIQEIILMNNDELSDVYEIDRYKLGKGSYGNVVKAVSKRTGQQRAIKIIEKKKIHNIERLKREILIMKQMDHPNIIKLYEVYEDNEKLYLVLELCDGGELFDKIVKYGSFSEYEAYKIMKQIFSALYYCHSKNIMHRDLKPENILYVDNTEDSPIQIIDWGFASKCMNNHNLKSVVGTPYYIAPEILRGKYDKRCDIWSSGVIMYILLCGYPPFNGKNNDEILKKVEKGEFVFDSNYWARVSDDAKDLICQCLNYNYKERIDVEQVLKHRWFKKFKSNNLIINKTLNKTLIE…
TGGT1_305860	P. falciparum 3D7	PF3D7_0310100	calcium-dependent protein kinase 3	-	MNDLIIKNNKKGSCDVIIKYKCKKSDENIKRRKSSHKYIKNKSVVLGRSIMTNKKEKLKGALKYKGSKKEIKICNKKSMIKNDKDENTTLKSMKSDNFKFSRRGFILSFTGNLEDFYNLSKEPLGKGTYGCVYKATDKLLKISRAVKVVSKKKLKNIPRFRQEIDIMKNLDHPNVVKLLETFEDSNQIYLVMELCTGGELFDKIVKKGCFVETFASFIMKQIFSVLNYLHIRNICHRDIKPENFLFYDMTPESLIKIIDFGLASYFTHNNYEMKTKAGTPYYVAPQVLTGSYNYKCDMWSSGVLFYILLCGYPPFFGESDHEILSMVKKGKYQFKGKEWNNISEEAKDLIKRCLTMDADKRICASEALQHPWFKKKKYAFNMDMKMDIHVLENFKNYGL…
TGGT1_313290	P. falciparum 3D7	PF3D7_1461400	MORN repeat protein, putative	-	MSCCTRNSVRVENPKKPIYEKLNSKKTDLNKSEEDLGEITTVTLLNGSIYKGTLKDNKLHGKGIVNFNDGSSYEGEFKNGKKEGKGKWSDGNGNSYEGEWLDDKRHGNGIYKTKDGFIFDGSFKENKRHGKATITTPDETKYICNFENDQEIGDVEFFFANGDHAYGSIKDGTLDNYGRYEFSNGDIYVGNFKNGLFHGKGYYKWNYGEDYKVYEGNYFKGKRNGTGQIIHSDGRIFFGAFKDDNMDGEILEISPQGIQTKLLYENGKYIRILDKIDEIYDIKEIIQESSIKTSIFTDPYIYKQMYEIEKKKKGKIRINLKK
TGGT1_247690	P. falciparum 3D7	PF3D7_1219600	aminophospholipid-transporting P-ATPase	-	MSLVYRKTLNFLKGKNEDDKDVKININGENKRTCNNSVITSKYTVFNFIFLNMYEQFHKISNVYFFFIGILQVIPQFTATNGIPTVFFPLLIVLTANAIKDAFEDWNRHKTDKIENNRMCYGIVSEEEKKIYQEKSNKKNIFKKLKRYFFGNRKICNTENYYDEDDMCDDEITDINDYINNYEDNLENIEGTVKKRWKDIKAGDIILCRRSEFFCADILLLCTSHKNGIAFVETSSLDGETNLKVKEANTFLFNILGNDRNSAIDNVKNLKGFILSDKPNKDLSTMYGTIYFEKDKKIDVENIGIQELLKKTTEEIEYRKKRLSSVDLSKSSSAIGSNLCNNNNKSDSKSDIKNYNKDDDDFDDMDENNILKNDNYIRIPFDEKQFVLRGCKLKNTDWI…

## Sheet: Babesia
Input Ortholog(s)	Organism	Gene ID	Protein name (Babesia)	MG	Predicted Protein Sequence
TGGT1_311360	B. microti strain RI	BmR1_04g05785	protein kinase, cGMP-dependent	-	MALLHNGLSNLDAANEEKEVESHLCDREKTPYDITLITNSIKDNLMCSSLNEFEIEALASSMRLYKYNKNEIVTKQGAIGSHFFIISSGHFQVDISGNVIKVLEKGASFGEISLIRNTARTATITAVYEGPFYLWGVNRQAFRDLLKQLSVRNFAENRKFIDYVIIFEMLNDSQKTMITNALVEVKFNTGDNIVVQGDKGDVLFILKNGEADVIIDNVCIRRLNKGSYFGERALLYDEPRSATIKAVSETTCITLTRDILNRVLGNFQHALFRNIMMESLQQSEVFRQFTCNQLTQLIESATVKDFLGSKTILNCEILLKGIRFFIVLEGNVEIYYNTHLLGKMSRGDSFGEEYVKEPKVPFSHKVIATSNCKIAFLTGHALLSVLGGEDLEGKLEYNN…
TGGT1_306660	B. microti strain RI	BMR1_02g00735	MATH and LRR domain-containing protein PFE0570w	-	MDGELIDQTSSSLEPAFPLEPPIPDRSPFRYDDECKVLEFPVRNFWKLAKTQNDIESLTEGHCNGFYYRLLLHPRGTAGTDSESNHLSVFLEAVVQDWYPDYWVFPNVRFELTVVNFKDPKQSVTSWAHWSFSSDATSRGWQKMISHAKLTKAAGFMDDDGTILVRGKAEPPYPRLWSRVPPYRPTKLWASLRIPHCELSDKLDSILSDVSDHSHLDYSQSSLSDLSDDFSISFSESSCVNPWHKHEEEKVVMERILSAVEPLVPSIQPTLDSDVLSLFVCILYNIKEFRKRILSFPYEEICSMTTNGQGEKNFSDPGATAPGSENIISALQDTFAYMYLYPIAAICKARKNARPLGLSTEDFYLNEILRDKDLDRFDNSLSSPFHFEPTLHVNCSSLD…
TGGT1_242070	B. microti strain RI	BMR1_01G00842	hypothetical protein	-	MDSSALQTLNFYQRLQFELEVEKLVVQNRELQRANDELKQKLTTACKNPFKDNLSFEFKQIYQMEIQRLNNCLENEKKLSKTWRFAFYQLARQMDPGADHARNSLVFAKALVLLEEAMNKIEFYEKNYTSKIIPNDLNQKDSINEQLPLLSPSIRSVNPKSSDYPGAQTFFSKLKQQTGDTNDTKLFNPIDAKCLGEQFDELIKSDRDEHASTDAAMTDVTNEDFNYSNSVIGDTIKVCSNDDDFPNSNICSPLNYLNIDTKHTESLDYDPNDTAVNASLDDEYANDSDNNFSPQTFPINNLNTMDSPITQHKEIANPHLKFLDDTTSAEDEDENSQTNSPKDVSTISEHMNSDALFLIESSPHLKHLSAKVQQNISKRLRHISFYPNASVIIQGEDPD…
TGGT1_262490	B. microti strain RI	BmR1_04g06005	Alpha/beta hydrolase domain-containing protein 17C	-	MEAFIAKNSGSRMNIFCMGCLTMCGLKNRIINKIAFVPPKVIGYEVTSSGKFVISDQILWEKFADELDMNGIELDFHWVPTKTHRIACFSLFPKPTNEDRITIIFSHGNGSDIGHCFGFCFRICCKFRVNVIAYDYSGYGLSGGSPSEKNLYRDAASVWNYTVQQLSIPPDTIILYGNSIGSAASCYLVNCLFNSKKSSKGIVACDKLGGLVIHSGIASGLRIFLIKIKKSPWFDAFCNCDSLAKSKINFPVYILHGKDDRVVPFKHALILRDSIKLEPPMLQTWWVDGADHNNIEMDYANEYYTRMGAFLQICKIKSGKW
TGGT1_305860	B. microti strain RI	BmR1_04g08970	Protein tyrosine kinase	+	MGAACCKQANINTILRRSDTGSTELDDTTLGKDKEMTINPAMYINKTFATLSDKYHRVSKIGSGAYGQVVLCRDKVTGIEKAVKIIRKSDTLEICSDKLIDEVELLKSLDHPNIAKLYEFFEDSRKYYLVMDHYKGGELFDEIIRRQKFSEHDAAVIMKQILSGVLYLHNNNIVHRDLKPENLLLESNKPDSLIKIVDFGLSAHFNGSRMMERLGTPYYIAPEVLKKCYDEKCDIWSCGVILYILLCGYPPFGGQTDEEILFKVERGKCVFDMNDWCKVSEEVRSLVKAMLTYDPAKRISAKEALMHPWFKNFSCNEMSVSSSVLNNALSNMKKFQASQKLAGAALYFIANKLTTLDETNQLTRIFHELDTDGNGRLDRNELILGYSKLMAEMGSSSDD…
TGGT1_313380	B. microti strain RI	BMR1_02g02765	G2 protein, putative	+	MGHQNSKVNLDDIRNNVVSSYPGIEEQLDIAFDYHDPEKAGFISYSLAEPLLRHLLIQYGLVDYINRFTNSQGEMDLKYVADFLYYIPELESQLKPLQDNVEVVITAGHLKSLAIIWLQKIADVYHADQAQWNKQAEIEKHMQHESTCVNRCQNDQLEREQYNDHLKLSCQVGFDQNFNGMYNVPNTDFQFENQGVTMNSYMNQIHNNPYQSNDYGVKCFVYPTANIPGGVCTSAGAILPMRRPRSPLYNGVRRQKQKPFTRCC
TGGT1_276140	B. microti strain RI	BmR1_04g08780	Arf/Sar family, other	+	MGIRLSRLMSRLFSKKEVRILMVGLDASGKTTILYKLKLGEVVTTIPTIGFNVETVDYKNISFTVWDVGGQDKIRPLWRHYYGNTQAIIFVVDSNDRERIDDARDELHKMLNEDELKDAIVLVYANKQDLPNSLGIDELTNRLKLQQLESRPWFIQATCATTGTGLYDGMDWLSYNLKHY
TGGT1_261500	B. microti strain RI	BMR1_03g02286	alpha/beta hydrolase, putative	+	MGNGPSLGNSLLFPVPKSSYDETLDQLIWIPEDFGFNKRRWEHKSFPALWIKSAKPTKCIIIYFHANSCDIGHIQPELQVISDYLNASICAVEFPGYGIPPDSIYPKEYPNGDDINRRGISAFNLFVYLGVPASSIVFFGRSIGTGPACRIAGDLGKKGVKIGGVVLHAPYMSVHKIVQDYSPLGTWIIDNYWDNEASILDMAPNTPLLIIHGLDDEIINVIHGKTLFDKYESKFKMGYFPSESYHNEFYIIDDIAMPFLDFLRTKSNVNDNQPFDIDVPKVYMNKPSRFNKRAEPVRSTSRDVHICNLRSTSLPSFGETDILKSNSKNNSGRAESARMTNSRTESSRACKAQTSGPCGIFRRTVNPLSQKKGSKSTSPTVDEKPLSNYLDQLTQRGAI…
TGGT1_245710	B. microti strain RI	BMR1_02g02800	MORN repeat	+	MGNNKSVHGHKLTQVQEEEYFGHYGSHVIHAKRSGRTNLTRSTSKNSLNSLVYRSAHPSTSKYNSPASNGAKPVISSPSDLEIDSFMEYEDQFEYLNDYINTHPDILTLGKQDSMDNCTLVINQSKGSNNESDKFFKDKTDISTNSSISSLGYGQPSAKKCLIEDSYDGVTKNDGCRLIYSTIHIPDGSTHQGHWLNGLQHGLGSEKWADGATYHGEYLHGKKHGFGQFYWPNGNSYVGRFVDGQINGIGTFIWNQGKRYTGEWKDNQMHGHGEYVWPDGRIYRGEFINGKRHGVGLFEWGDGRKYQGGFKNGTQHGMGIYFNTKGIVQHGIWNNGKNTKWLDPHNTTTIDKSDIRTKGDNDKINLPINIHNPPDSIKGKDPCLNDGKHEADEDYERVFK
TGGT1_316540	B. microti strain RI	BMR1_01G02192	inner membrane complex sub-compartment protein 3, putative (ISP3)	+	MGNSACTPCVDVCGEEYVPDVTDTPAIIELKSGRETSNCDIDSKLLHKKSNEIVLIFANDCSVPGRLQLDIQKKVLIIDVHDKIHHLHLNEISHVVNKQSENTLQQHEKRLLDDPTIVVLSLLPSTKALAIAFPCESEAKAFTKFINDAKRS
TGGT1_262490	B. microti strain RI	BmR1_04g07110	Alpha/beta hydrolase domain-containing protein 17B	+	MGNSLNSLVFRPPRPTYSKNDPHLHMIAKPEGDAIAAYFVRHRSAEWTFLFNHGNAEDLGMVARQLVRRIPYWKVNFFAYDYSGYGRSGGHFSEKQVYRDAELAYNYLTNVLGVRKDKIIAYGRSLGSGPAVHLCVNNQLGGLILHCPITSVHRVKLNVPFTLPGDIFCNIDKAPFVKCPTLIIHGTKDEIVSISGSLAMLKRFRLAYYYWIQGGSHNDLDTHYLDEFNFAIVGFLSLLSTPLEQQNDNILPLDIRLAVQLLESSKIWGKLSLMNSVTSNSLINAATKFEKDETILTTSTTLDSVISSNDVCNIYDTRRDLNPNIFQNHTSPIM
TGGT1_249970	B. microti strain RI	BmR1_04g09065	conserved protein, unknown function	+	MGNSSSLPDWSKRVPDGPLFPNRLNYPIYGDPKRAFGISSGAFLPFFGEELFIVQSNDKYTLNNPLVSQCVSDLDGKSGPSTFVRNVHQGKSANMESRSNKRRPTYSAKNFKSQIEDEQSNSDIDDSVTSKSAKDLRISKLIEFKKMLTTEIKFKTAIFYEKVKITISTDGNKLEWYKAKDKYNASENTGTPLGTIIMKKITSAKTKIDDTRCLEIIVGNTSYFLMFKTQQDRAKWQMQFDSLRKFMSMI
TGGT1_267080	B. microti strain RI	BMR1_03g04005	26S proteasome regulatory subunit T2	+	MGNTHGNFGQGRHDDKRKKKDLRRQPPGPPIGMNKHKCKNHKFSQQSKLPVVMPLARCRLRLQKLERIKDYLLLEEEYITNRDRLKPAAKKKQEARMKVDDLRGSPMGVGVLEEIIDDSHAIVSFSVGPEYYVSILSFVDKSELELGASVLLHNKTNSIVGILTDEVDPLVSVMKAEKAPLESYADIGGLEQQIEEIKESVELPLTNPELYEDIGIKPPKGVILYGPPGTGKTLLAKAVANETSATFLRVVGSELIQKYLGDGPKLVREMFRVAKENAPSIVFIDEIDAVGTKRYDATSGGEKEIQRTMLELLNQLDGFDSNGNVKVIMATNRIESLDPALIRPGRIDRKIQLPNPGVKTRRRIFQIHTRKMTMSSDVQLEEFVMAKDELSGADIKAIC…
TGGT1_267440	B. microti strain RI	BMR1_03g01535	hypothetical protein	+	MGNTVSQSNDDYPNLQQRIITYPTDDDENQASNTHMCGIRRVKHNVKELSVPIYVYPKTISITFKNKLLHIHFKYRSFTTVKLDVYLALQIDSNKLPSLTNSIYTCELRDDNAEFSSQPIKIDSERYEMLFYNSDKNYIPIAIALGKEQICYLIYGGFHPKTTSEEMLSCGTTCNYIVVDSLIYEIKEVYGTKSDNGDVCCICLSGKRNVITIPCYHCCICTQCSKNPCVKKSGCPICRSSINGFIEID
TGGT1_261980	B. microti strain RI	BMR1_03g02635	GRASP55/65 PDZ-like domain	+	MGSAESRGGLRVHQIFPSGPAHSAGLEVFFDYIITANEENVADESPQAFARFVEIVTLSENDRLVLGVYNALTNNIRNVIVHPAKWHGEGLLGARVIYDEFNALFQGNRVLAVVPNSPASKAGLVATSDYIIASTTELLIDQDSLCEAIAASKGILELLVYSSTTESIRHVTVQLEAQIYAIGCDLGNGFLHQIPRARMPWSNAHGNLELENSDYCDNTFVEDGLYPSFIPHVTKSNSPRENQHHVLGNEDYILEQ
TGGT1_310930	B. microti strain RI	BMR1_03g04670	conserved Plasmodium protein, unknown function	+	MGSVCSGICKPRSGGKNLQCNVFSNTELNNLHNHNSKRSSKSTLISPAKSYSKDSDISTSSSVVFRLEKNKFLPSVSNKKSIVDGWISQRNSIDSDAEPFLILDTRVALLLINYLMGQDVLNLRQICRVWRDIIDYTLDIHLEHIIAQFKCHYKGLLEPVSKFIKASPIYNRPNEPRIDLIITAKVIGGVGMINNIGYKFKYKGKTQCYGEQFHFQSLRQGSNRMLFFERDESHVYTDDIKMPVIAGVHQFCVGDFLQIPINLHNAYSTVDMPSIEVMPCRQSVCSVRQMETCHIDSMYDENWEQITQTSDKPQKLIDIMNKINSLLKDNNKLMILSADHAGYDVATIRLRLIAVESGKICEELGRYVAQGIEVFPAKAPITGILTRKGLTQDLYTTTQ…
TGGT1_305860	B. microti strain RI	BMR1_03g01395	Protein tyrosine kinase	+	MGTAESKLRSPNNTGRTAPKSSNRSMNKYGRSDRLIVKPGMFVQNHNSVFSENYKAIKLLGKGSFGEVLLCCNRSTGMQCAVKIISKGNVKRTSDRESLLREIELLKELDHPHIMKLFEFFEDRGYYYLVTEYYSGGELFDEISARKRFNEFDAAVIIKQVLNGINYMHKHNIVHRDLKPENLVLESKNDIKRIRIIDFGLSTHFDVDKKMKDRIGTAYYIAPEVLKGTYNEKCDIWSTGVILYILLCGYPPFNGPNENEIIKKVTAGKFSFSGQQWSRVSDGAKNLIEKMLTFNPYTRISADKALLHPWLCKHTKDDPTNLPLLENTIKNIRSFHYTHRLAQAALLYIGSKLMSKDETRDLTDIFKKMDKNGDGQIDRDELISGYKDYARLKRDVNFK…
TGGT1_242070	B. microti strain RI	BMR1_01G03115	cAMP-dependent protein kinase regulator	+	MGTDDFDPSEEMLMKMCRHRTSVSAEVYNDYTAMNYIYPIYHKEPVQHTQITNAIKSCFLFSSVDDKHLKILVDAFNCYEFLPGTVIMRQGDLGDKLYLIQEGSVKVTKLVDGKEQFICDMKEGEIFGELALMYNAPRAATVTAIGSVKAWGLARECFNHLVKNSAIKKREEYGSFISKIELLKGIDEYEKLKLVDSLQIVEFDKDATIINQGEDDDRLFMMVDGKAAAFKDGIEIKKYSSGDYFGELALVRGTKRAATVKAIEHCKVAVLDRVRCINILGPIESIVKQNIENYRQALIDSGIDPSFLNNY
TGGT1_255245	B. microti strain RI	BMR1_01G02355	mitochondrial import receptor subunit TOM22, putative (TOM22)	-	MHDYQSLIRHKLSVANHRLQKLISLGISTVGWILWIGGTSIVTLVGPVMFHYDRECQLLEMQQQIIQAQQAATTPILN
TGGT1_243800	B. microti strain RI	BMR1_03g00530	long-chain acyl-CoA synthetase	-	MIHSVPIDTNESCGNYACDANCTKVYRNVNFAKKLLHPRDFNFPVTGWEIFQRGLSKNPDAPCFGTRTISPDGSLGNYEFKTYAQVESLVKRIGSKILQFGVIEPVDTGFDCIPPCYPIGIYSPNCIEWLITEQICNAYALTIVPLYETLGNDSVMHIINETKFKILVIETKCAEKLLKTLEAQSGFKLPIKILIVVGDKLDDKLTRKLSMRIVYWNELLSQPVAPTDLIEFKPAGKDVLNTISYTSGASGIPKGVMVTQEMICCAVNSVINGVCQKDGLSVEALVTYLSYLPLAHLYERLCVNCLLCQGGKIGVYSGNVKLLLDDAKELKPTVFASVPRVYQKIFDSIMNALSEKSFVVRGIFHFALNSKLDNIKSKRTFKHLIWDTLLFNKLKRLLG…
TGGT1_243800	B. microti strain RI	BMR1_02g00110	Long chain acyl-CoA synthetase 5	-	MIPGTAKDHYSVPLRDSKTPNCSMVYRNPLSVNKLFDSKTDHHLKTAWDIFQQGKSKNPEADCLGKRRRLLNDKFSEFEFISYAAAENLGNNLGSALLHLDCLVEQPSGFPNLLPIKPLGIYIPNCIEWLIAEIACNGFGLTLVPIYDTLGIESTRYIMKITQLTTIISSVDLALNILQAIGNSPNPTEFALKYFIIVTEDPIPKQLEHNDLGIEIKLWRDVIDLGRAHPRHFSPATPNHIHTISFTSGTSGIPKGVVISQQAFTTTITSVFVSFELRGITSIPDSLKVYLSYLPLAHMFERCFVNAVYCISGKIGVYSGEIKTILDDFQSLKPYIFTTVPRLLQRIYDRVMNNIQQKNFILRALFYRGLSIKLQRIKATGNCEHGFYDKIIFGKLREL…
TGGT1_232340;TGGT1_267100	B. microti strain RI	BMR1_03g00275	protein phosphatase	-	MKYWLPAVLIFSAKHQNQRIYIFNGLASLPTIWLKGVTALSRTISHKTGSEEHNKIKFRCIWWSMQWKNFIQQDNGGKKYTCGTVQTRGLGHIKNLHRPTYIFGPCCDPYYIYLNMGAHLSSPQTEKNSSSGGDFNSDLTRFGQTAMQGWRVSMEDAHLAIPNLPIDLWEIKSISLYGVFDGHGGACVSNWISDHFPKIFKSQLDLLQHKYSNGQLKLKSQESISPPQALLAEVLQSSFIQVDVDLLKPEGEAELREINEKLRSLSENGLKSADIDSKNGSNLFKVFLPDGLNRHHTLQFLEQHLGRSTAAASDSTPNTYGAEESNDLYERSRTIDRVGTAGDSSTQGFSDPDYEDSDLSAEDESAGMDEMPDAHSSLPSSSMPSDFTYSDDGLAAGCG…
TGGT1_232815	B. microti strain RI	BMR1_02g02015	conserved Plasmodium protein, unknown function	-	MLDANKIFSAIDDNKAICPCSAQWIMVPLCYAAYLPESPDNDVQAHAKIFFSYFPDQCIDEPFNRCYRNYSDSNPPPVHDRKKLMYWLQIAENECRRKAGVPERVFSFKRLMRRWRYPDGYI
TGGT1_261440	B. microti strain RI	BMR1_02g01975	armadillo-domain containing rhoptry protein (ARO)	-	MMSQLCCCLGRDSIYKRGMNRIKREALETISGINFLNSISSPRDDIEEFDRAFKNNDIPSLIKLCNSNQPIGKVQSKLHPWAKNPDTVGALATIKIAMIASHCEKINSSTNDTEISESDLAFAQKFLDDIIDFSGICVLVRNLGSEEVDKSQCALVALSFLSVQSLEICQEIHDYGAMSELVELMDSDNPGVRSAAVIVARNIYQLSVDYRREFIELEGLDKLIRTLKGPPNESPQFTILETLYYIQDLVVDEEGVIMEIANSLTPYVKQLIFSYTNNSNPDIALAATELKNCIL
TGGT1_247690	B. microti strain RI	BMR1_01G01915	DRS2, ATP8A, phospholipid-transporting ATPase	-	MNILNFFFKKTQPIERWIVWINREQEMNVNNNFVKTSKYTVYNFFFKSILMRLKQPLSLYFLAIAILQITPSISATRGIPTVMLPLFIVIAIDSIKDAYEDWQRHTSDRAENNRKVYWVPKLYIPPLKNQNLSENELGLGLIKEISEGTLNSLNLEWKLSSKIEVGDIILLRNREEIPADVVLLTSSGLNGISYVETLCLDGETNLKRKEAVQITQNYLKNDLINVLERIKNCEASILCNVPDTDLDKFKGTLTMFKLGAEVNFPEARKDYTININNIVMRGCILRNTVWALGVVVYTGHDTKIYMNMSPPRTKTSNLDILVNHIILVIFIIQFICCILSALVNLYYYMNYGSIGRVYLSPFYKDVTEVRVVCTSFFTWISITCNVIPISAVVTMNLVR…
TGGT1_240550	B. microti strain RI	BMR1_01G01250	cytochrome c oxidase subunit XVII assembly protein	-	MPCLIMTHIAQYILQGLTWGMSYKLASFCGYMFNFTRFTEALHRENKENSAQTTVQPSGQTNSVQKKRPCCVCKETRLARDICISSNGEENCSTFIDAHNQCLIAENFHV
TGGT1_305860	B. microti strain RI	BmR1_04g07905	calcium-dependent protein kinase	-	MPCLRVPICCGQVEGKMSDNDKVEECIHNDSQCDQPSLHSLCTKCMPEQDRSLRGYKGMIIKTPTYLYQDTIKVSSPVFNRSNIVQENIISDISEHYILQGDRLGKGSYGHVMRAKCKETGQIRAVKVIKKAKIENTMRMKREIQIMKLLDHPNIIKLFHVYEDFDNLYLVMEMSAGGELFDKIVKHGCFSEAYAANIMRQVFSALWYIHSKNIIHRDLKPENILYSNSSVHSPIKLIDWGFSTMCSTKHKFSSLVGTPYYVAPEVLFGNYDKSCDLWSAGVILYILLCGYPPFHGKDNAEILKSVKRGVYEFDPRHWKYISPKAIDLINKLLCYDPRKRIKASQALNHPWITLNSPQSSIAPEIPQRYINELLKRFRQFHHFNKMKQMALTCIAYNLT…
TGGT1_277870	B. microti strain RI	BMR1_02g03295	conserved Plasmodium protein, unknown function	-	MSGAITDNSSNIISPNNNDDKHIKDNSDVDLYMHLCNVKDNIVPIFISDDVEAESHKFQYISYDPQTHLNVESTSASSSTFDEPIIILKAFEVDEIDEYEDRGCYDEHVLQFLSLKPENITNSITILGQPIAGQSLKCIDHSALMDKFPIYSYEWVLSSEYGIRDKYNPQIISKTDTLLVDNTMIGKFIACRANRIIEKQISQGDDYKIKTNVYDPHVNIDLVQMSNFSKKERAISTAATGPVLICDDWALVILEKLVESQLQFDVQFHIREDILAICGEFRYKHLYTSQIEWMDARLHVNYNKLVISFPNLTPSDKMREIFEVFGISDSIEMNITNIMLNRDSQSSLLIENKSSTLDQTYIIEINNVQPKEYSKLLYYICGCYQMSSVYKVTHADWKN…

## Sheet: Cryptosporidium
Input Ortholog(s)	Organism	Gene ID	Protein name (Cryptosporidium)	MG	Predicted Protein Sequence
TGGT1_311360	C. tyzzeri isolate UGA55	CTYZ_00000084	Cyclic nucleotide (CGMP)-dependent protein kinase with 3 cNMP binding domains and a Ser/Thr kinase domain	-	MAFLTKLKTSKLSSGVKAAKETTYEELSKEENGEIEHPEEKMVVFRDRQKANIQSRIGGLSKNMSNISNAGGGMEDDYERNMVISHLKDREKTEEDIKTISKALAGNVVGASLNESEIATLVSSMHYYEYEVGEVVIEQGASGFYFFVISTGSFGVEINGNRVNTMSEGTAFGELALIHNTPRSATILVIEKGGLWGLGRSTFRDTLRLISSRNYEENRAFIESLSIFSGLTDKQKSLLSEALVREIFVKDQVIIREKEIGNVLYMIKSGIVGVFVEDKYIRSLNEGDAFGERSLMFDEPRSATVIANATTECLTLNRGILTQILGNLGQVLSKNLIQQSLQNSPIFKQFTKNQMQILLDKISIKTFQKDVILSTAETKALNMRAFVILEGEVQVSLPS…
TGGT1_292120	C. tyzzeri isolate UGA55	CTYZ_00000359	Phosphatidylinositol-4-phosphate 5-kinase	-	MDIRRFRIVLGLLDDGLLSQMIFNAMDTDNNNLLDFYEFGRALAIMISDNFDEKARFSYRVIKGENYMNLSDGITFEKLLKSIRAIDNARYMLVGPQILNFSDQEIKNFFNDYSTVKDEQNEPKIYFESYKAAIQDSSEFLSFFGIITPNILESYDLDIESRKSPLIFEGINIFNRLPIDRVEYNESIEKEFTSRLKLQVFNILEDIKNIKQETTDSLNTLEKWIRSPNENNLLNCMLFDINKSTNMFEAQNFTDANSIVKIFTHDMLFLKSVLNNNIEMLDSICKKSICSLQNMVPPSQIVTYNNFNLGIIKKVYNRRKMYINKGNVAPNTKHRMSASEMIKKTFMHKSSSTLDYTRNSYCSNNRKRVSLIHTYRRRSNISGRFQNMAKTSSKIKVKG…
TGGT1_243800	C. tyzzeri isolate UGA55	CTYZ_00002773	Acyl-CoA synthetase	-	MEEKIDRKDFFSVELENGQVEPESSPIYRNPNYSKGELSNLQGLNANNLWELFVNSVNKYKNKKCLGTRKLNRDGTYGEYVFKSYEELKEEALNIGINILKMDLCPIRKYEDNEYQKEISMMGILSRNREEWYLTEHACNAFGICLAPLYDTLGEDNLKFILVQAQLKSLCISNDSLEKIISIIERSIIDSTRDSILIKNLICFDHPTTEINQRAKNLDINLILFKNLREKVSKKDKEIYKPKKIKPDDMCSIHFTSGTTGYPKGAILTHRCFLACVKSSYEHLFSEKEIQLDNEDAHLSYLPMAHIFERLIVMNAYYLGIPIGIFSGSVTRLMSDSQELKPTILVCVPQVLTRIIQTVNDKISQSNFLVRTVFHKALKQKESIIKTKGDPTHWLWDRI…
TGGT1_247690	C. tyzzeri isolate UGA55	CTYZ_00000775	Haloacid dehalogenase-like hydrolase/Phospholipid-transporting ATPase	-	MFVLGKASKRFSVVKESRPRLVVINNRQVRNFSGNFIRTSRYTVLNFIPKYLFEQFCRPVNFYFLVISLLQIFPSISSTNGIPTLALPLVFVLFVGAVKDGWEDLNRHQNDRIENEREVIVIKRFPFINYIHGRTLACDLEEAEKPKNKNPSLKHVISFKSENDEQSNTNHSWFLGIEGSERSSSSELKVGDIVLLRNHETIPADIVLLSTSSENGDVFIDTSSLDGESNLKRRFSHKESTKMLGNNIHDVIKRARYLEGLIECSPPGKDLHNFDGTAIIRLPPISEGLVTQGNTITQFPINLDNIVLRGCILRSTEWAIGCIVYAGHESKIQMNSLKPTKKMSNVDKFTNKMVLVVLVILFCLCMTGSLLTYKYIFDGVFDHLDYLGVSDVNEISYRA…
TGGT1_305860	C. tyzzeri isolate UGA55	CTYZ_00003247	Serine/threonine-protein kinase with EF hand	+	MGCTPSKGKVEFTSRKREENEKEVEIKSVEIKNDLQATPGMFITSKKGHLSEMYQRVKKLGSGAYGEVLLCRDKVTHVERAIKIIRKTSVSTSSNSKLLEEVAVLKLLDHPNIMKLYDFFEDKRNYYLVMECYKGGELFDEIIHRMKFNEVDAAVIIKQVLSGVTYLHKHNIVHRDLKPENLLLESKEKDALIKIVDFGLSAVFENQKKMKERLGTAYYIAPEVLRKKYDEKCDVWSIGVILFILLAGYPPFGGQTDQEILRKVEKGKYTFDSPEWKNVSEGAKDLIKQMLQFDSQRRISAQQALEHPWIKEMCSKKESGIELPSLANAIENMRKFQNSQKLAQAALLYMASKLTSQEETKELTDIFRHIDKNGDGQLDRQELIDGYSKLSGEEVAVFD…
TGGT1_242070	C. tyzzeri isolate UGA55	CTYZ_00000602	cAMP-dependent protein kinase regulatory subunit	+	MGFICPCASSVDAVHPKKSSGKEDKRKKTSGTSSGSESESDSDDVRDNIEIPKNFLARGPRTSVSAEAYGAWNKMKDFTPPSYPKTKEQEKRIREKLLESFMFTSLDDDELRTVILACVETSVKKDTEIITQGDNGDKLYIIDQGVVECYKKTSTEPRKHLCDLNPGDAFGELALLYNCPRAASVVAKTDCLLWALDRETFNHIVKGSASKRISTYETFLKEVEILKTMDVYELNKLTMVLKSSIFEDGQEIIKQGEQGDTFYLIITGNAVALKDNVEVMSYKRGDYFGELALLRNAPRAATVKARGRCKVAYLDRKAFKRVLGPIEDILKRNTDKYKTVIKKITTKV
TGGT1_261980	C. tyzzeri isolate UGA55	CTYZ_00000624	GRASP55/65 PDZ-like domain containing protein	+	MGGAQTKQLGGFRVCNYGDNSLGRLLELERSFDYIVGIDGVPLTQVSDASHDFFLKRLKGIGRHQVKINIYNSLSTRIRTIILNPHKQNENNEGNTPNRKFSVESEKDGLRKNAFVDGIESNMVEFDAPLNSLRVYQFLSYDERISGLGIGVHWEEISTKGIRVVNIQDSSPAQAAGLISNEDYIVASSTLMRPFYSTDDFLVFVKKNDKVPLSLVVYNTETEVTREIFITPNSDWGGKGLLGCDIAAGPLYDIPLREKEVSFSKPHHGNITYIEVIIQNNNGKETILFNLKEEHEVISKDFLHRDEDKDKDSCFNKGNDQQQLEPQIDEIPREDLIVKDYSFDLYRIKQSEESLFDEKQGIIEQALINSGRQNIPDFSINPVQCLREATIPENDHEFT…
TGGT1_220320	C. tyzzeri isolate UGA55	CTYZ_00003551	BSD domain containing protein	+	MGIVESVEDLTQEMELEMKDFDETMQDNVFPWFHIVQWSSEELPTNTVLKWNYKSIKEKVQSLTLNKQVFLTNCPVSRIQGFSLDEGDPDCIIPFAEWAAALLSQMDELNNIRYELVPSRMSESIFWQSYFNAIRNIIIKDVSLFFFLIDPIKLLLKFK
TGGT1_276140	C. tyzzeri isolate UGA55	CTYZ_00002590	ARF1/2 like small Gtpase	+	MGLALSRIWNRLFGKKEMRILMVGLDAAGKTTILYKLKLGEVVTTIPTIGFNVETVEYKNISFTVWDVGGQDKIRPLWRHYYTNTDGIIFVVDSNDRERINDSRDELMRMLGEDELRDATLLVLANKQDLPNAMSVTEVTEKLQLSSLRHRSWFIQSTCATAGDGLYEGLDWLARNLEKAAS
TGGT1_276140	C. tyzzeri isolate UGA55	CTYZ_00002800	ARF/SAR type Small GTPase superfamily	+	MGLALTKIWRNLFGKKDMRILMVGLDAAGKTTILYKLKLGEVVTTIPTIGFNVETVEYKNISFTVWDVGGQDKIRPLWRHYYSNTDGLIFVIDSNDRERINDARDELARMLGEDELRDAVLLVFANKQDLPNAMSATDITEKLQLSGIRNRNWFIQSTCATSGDGLYEGLDWLSRTLASRSNN
TGGT1_232340;TGGT1_267100	C. tyzzeri isolate UGA55	CTYZ_00002918	Protein phosphatase 2C	+	MGMFLTKPSTTKHSDQGGDFDKYGVRFGVSGMQGWRVSMEDAHIALPRLDKHPELSLFGVFDGHGGSVISEWVSRHIESIFEQELDTVLKELSSNEINLSPDKSKLPNRVVAISEALQRTYIKLDEQMASPTSRPEQRAIYDKKKTNSDTNPPKTFLQELLGGIDGQRRVLRMVEQNGNRCLQIVSYNGDEESNSSENGNVDGDKVEEVGEIKKSSAKDEDSSYGRQPAENIPSTDLDENQNYSDEITPFESDIKRDDATYDDPNAGFIDDDGLAEDDGYLEDISDSGACGPEHCGTTAVVAVILPDETGDTPYLIVANAGDSRAVLSRSGQAIALSHDHKPELPLENERILKAHGTVENGRVDGNLNMSRTLGDLQYKSDSSLTPEEQKITAFPDVRI…
TGGT1_243800	C. tyzzeri isolate UGA55	CTYZ_00004030	AMP-dependent synthetase/ligase	+	MGNITSNVFYRHDDFIYSCPIEGTGDSNSTEIRRCKETVNSELTSNFHEKLENCWGILLHGKEASNNGDYMGIRVPLENGELSDYKFVKYSYVIRKAKEVGSGLLHIGAVQERSFEDCNIKLKCVALFAKNSLNWSITEQACNAYGISTIPLYDVLGNSGLTYILNSTLPKTVFCSASCCRKLIPLLESMKSVKFLIMLDNESKLIQESATDYIKENVTIMDFDELIKIGKSNLKEISPGNLESIHSIHYTSGTTGNPKGAVLTHRAWISCAAAFIYGQLGREGTKLSSNDRHISYLPLAHIFERIVHMVITYLGGKIGFYSGDVKKIVDDIQLFKPTIFITVPRVLNRIHDKVMMSIEEQPKPLQMLFHFALKQKERSNSPFHFIWDSIIFNKTKKIL…
TGGT1_267440	C. tyzzeri isolate UGA55	CTYZ_00002840	RING domain protein	+	MGNLIERENRGVQNPVREQITRRLSNTEYIISEALNRNDPRISLNNEKQEKKLISVSKSKAIQNQCHINGLSIRYIPSLKRMRFEYDCIQDSILNIYNSNSLEENLINTEKPIFSHIVPKSLNKEFQCDLKSDLKQNFVLEIKPKSSSTNNTETIQLTFCEQISKKVNNALESQIEIKRQCVLYNGKAFEIQNIFGLSNKSSKTSKNDEDSEKCVICLTNNRETILLPCRHACLCKICSNTLFKNTQDCPICRNSVLGVVNIEDSK
TGGT1_237820;TGGT1_260820	C. tyzzeri isolate UGA55	CTYZ_00001069	Uncharacterized protein	+	MGNLKSCCSFADEHSLTSTQLVVGNGSGASETASNHPQEEVNDINTFNVKLIMQDRSKLDCEVVFDSTSISLSGDGKCRNIALDEIHQLLYSKEELSRVESSAGISDSDNCVAIHLKESGNCIPLFFNNSQDKERFVATANKFKPNFN
TGGT1_240630	C. tyzzeri isolate UGA55	CTYZ_00000999	Calcium-dependent protein kinase 7 (CDPK)(CPK7)	+	MGNNTSAIENVIQQSFGVCLNVRQYINNNNFNERYRIGGIIGTGQFAEVFYCHEKTTNHPYAMKVIYSTDEVSVDRIIEEFEIMKLLKDHQNIVSIIDSNIEHIDEDKYEVKMVLELCKGGDLYQYVLANGAMEEKIVQKVMINLLDALKFIHKNGIIHRDLKPENILIDEFFCCKIADFGLAKRCISSDSSNKIARSKSLCGSDFYLAPELVRQQEYGPEIDIWSIGVLCYVCLCGGLPFHDNRAFDLYHKIVERGVNSYLFAQPAWKNVSSAAQHFVQWLLESDPKKRPTAENALNHRWLRTSFAKQGIQTSTYPFNNAGHKNSLSIGVDSSPVTTQSYENKNHISNHVYEIYKY
TGGT1_313380	C. tyzzeri isolate UGA55	CTYZ_00002583	Uncharacterized protein	+	MGNQLVKLRADRAQDAQDVREWAFATFPGLETNLEAIFAYHCTDGVGLLDYETIEKISRHLIMNFGYTDLLLRFTTPNGTLDNRHVSNGLAILDVDIRKPITLDTFKNFVVCWLDRLIEAQDKDVENLNSALNNEQEKQKARILHAVAQWRERFKTIDDFHVFCDDVRDAKKIELDEVVADVYEMQERLNEQQLRLLQRQKEVEEVYANVQAEEAAIQEALSNAPTATQIISEEIAKTFKNNIQGDVTQIAYSSELTPFGAPVSAGASTSFKRNIPKARKSTKVLGMC
TGGT1_267080	C. tyzzeri isolate UGA55	CTYZ_00002200	26S proteasome subunit P45	+	MGNSHGVLGEGEMKNNRKSKNNGKDEKKKLESAPPPMEMKRKRKQKGPPQYARLPAVVPNAKCRLRLLKYERIKDYLMMEQEFITSMESVKPSAETAEEEHNKVDDLRGSPMNIGTLEEIIDENHAIVSSSVGSEYYVNILSFVDKNQLEPGSSVLLHNKVYSVVGIMNDEVDPLVSVMKVDKAPLESYADIGGLEQQIQEIKEAVEIPLTHPELYDDIGIKPPKGVILYGPPGTGKTLLAKAVANETSATFLRVVGSELIQKYLGDGPKLVRELFRVAEENAPSIVFIDEIDAVGTKRHDSQSGGERDIQRTMLELLNQLDGFEARGDVKVIMATNKIESLDPALIRPGRIDRKIELPNPDCKTKRRIFQIHTSKMTLSDDVDLEEFIMAKDDISGAD…
TGGT1_301440	C. tyzzeri isolate UGA55	CTYZ_00002807	Calmodulin-domain protein kinase 1	+	MGNTAVGNTGTRLKAPVDVVVNTTNKKASVSEKPPQPQIPNKTSDVKKGGTMGGERGSVTTGMFVQSGSGTFAERYNIVCMLGKGSFGEVLKCKDRITQQEYAVKVISKASAKNKDTSTILREVELLKKLDHPNIMKLFEILEDSSSFYIVGELYTGGELFDEIIKRKRFSEHDAARIIKQVFSGITYMHKHNIVHRDLKPENILLESKEKDCDIKIIDFGLSTCFQQNTKMKDRIGTAYYIAPEVLRGTYDEKCDVWSAGVILYILLSGTPPFYGKNEYDILKRVETGKYAFDLPQWRTISDDAKDLIRKMLTFHPSLRITATQCLEHPWIQKYSSETPTISDLPSLESAMTNIRQFQAEKKLAQAALLYMASKLTTLDETKQLTEIFRKLDTNNDGM…
TGGT1_310930	C. tyzzeri isolate UGA55	CTYZ_00001977	Uncharacterized protein	+	MGNTLNFDNEEQLVLLTTHSNPLLPLKRSHSNLYLNSGLSSRTDSLQCISSSKVENSISNVLFNISERISKTNGIIYFFSKMEKKEIGLDHSDQETFCESSYVFEIMDLKEKRAQRESDVIESNGFGFGARTINGTERNLSHESGFGFEKKESIESSEISKIEIDIPEIQSSVSMFGSNIANMLKSIRVTSKKFVIFGNKNNHKPFLSPGIIDSFLPYILDETLLSCFLVCPHWLLTITEFINEYYCKSIDNQFRETYRKYLDLEHTTITIQPVLTVGGSVRIDRVLYAKVLKNCVNKTSCLTYNFKYKNTSIIKDCLKKENISQRNSLCPIIKPLINKPYLYSQISNTPFISCYKFVANKTGTKRIQWAHKDLSRCHCEEVAVAQTTTTSNVNVGDRI…
TGGT1_261440	C. tyzzeri isolate UGA55	CTYZ_00002275	ARM repeats containing protein	+	MGSTLSSGCCSGRESEEAKKLAQEKMNRSEALGDDISRFDLAYDKNDIQEFINLLSSTQPIDKLDEPMHPWAADPKTVGALAATQLAILAARDSQPELKDEIRKKGGIQGLLELLKSKEEDRIDGAIVALSFLSVNNVECCNVMFDCGVLPYLVKCMSSEIDGLRAASAQTARNIFILGLNQRKEFMRLGGITVLVSLLNPPTKNIDKPESWYTPLEAVYHIEDLIIDQNEELLEYTRAIRKCGVVEKLQILTKSNNRDVSEAAEILLARVAE
TGGT1_243800	C. tyzzeri isolate UGA55	CTYZ_00002106	AMP-dependent synthetase/ligase	-	MKILRLALLVFAFMMSINLIGSMKSKYYLGRWKNAIHSVAVEGTDDHPLMSAIYRHREHKAELIANFEESITNLIDLIKRGMVTSMDGYMYGRRQVKKTLDYDPISKLAESDDAKIAKKKKKKGIPLMEWFRYSSVLKLAAEFGSGLLSLKDSAPFVDHSPDIKKPIRTVSILSKNRLEWSLTEIACSTYGMVLSPMYDALGPDGVAHSINLVGSSTVVVSMEALSTILNVLPRLPGIRYIVLLRPEDGGDVEYPLDKVELSKDTLKAYGVQVSLSKYEIQSHVNFVTFEAVMRLGELNLKEPTPSGYDDVNSIYFTSGTTGVPKGAIHTNGNWIAGASASLRSFLNRSDCTLGPKDRYLSFLPLAHIFEREVNHILIYSGGTICFYGGDILKIGDDMK…
TGGT1_305860	C. tyzzeri isolate UGA55	CTYZ_00002370	Calcium/calmodulin dependent protein kinase	-	MLNIEQNADECAKRGANMVPVLHNVTEESNIKTEEKEIVPEVEEAKSESNNCLGSDEYLEGHIYAAMCTKCAGELQQKLNPTEPYRDPKKVSGKEQISRGLIIESKSFVDANKNIKFSKRADKNEYAGLCSSPEVTTPNGERETYTDSNIKNTEGTKVSHGIFDRTCLIQEHALVNRNINDFYELNLGNLGRGSYGSVVKAIDKQSGAQRAVKIILKPKLENINRLKREILIMKRLDHPNIIKLFEVFEDTNYLYFVMEICTGGELFDRIIKRGHFSERYAAVIMRQVFSAIAYCHSNEFMHRDLKPENLLFSDSSPNSLLKVIDWGFAAKCPKTHKFTSVVGTPYYVAPEVLYGSYSKLCDLWSAGVILYILLCGYPPFHGKDNVEILRKVKIGQYSL…
TGGT1_305860	C. tyzzeri isolate UGA55	CTYZ_00002347	Protein kinase/EF-hand domain containing protein	-	MMGQGQNALNGVCSRRYEKDSIEINKNKEVRRKQSNKRGNFPSHNMTHGKPEYLKEAVGRLINHGNIVGNSPDRYLAKERKSQASCSTSDPTSPLAYRNGNDNYFEQYEICDLIELTSEMALSNESRFESLSEYESIPKLSPSTTVMGITDISITNTSNSNSATPTESEKGSGPKLSLTEGKFRREGLIPACKGSIHSDYIIDSGRIGKGTYGSVKSGTNRLTGCIRAIKTIPLTRVEALDNFVKEINILKNLDHPNIVKLYETYQDKENIYLVMELCSGGELFDRIISQGSFDEIYAANLMKQVLSTICYCHDHGIVHRDLKPENFLFLNKNYNAPLKIIDFGLAARVNNEDTSLNTRAGTPYYVAPEVLQGKYDKQCDMWSLGVILYILLCGYPPFH…
TGGT1_232815	C. tyzzeri isolate UGA55	CTYZ_00000154	ERV/ALR sulfhydryl oxidase domain containing protein	-	MNFIRNFIKGRRGISQIRWRKETSLESEIEDKDNDSNENEIEFCRKSNYPKNSCEAQWMLLYSCITSMEDHPSEASLKSAKDFIRNIPDQCKFTQIEDTFSEGIKDFDNAISTANSKRELLLLLCTIENKCRHKLGKPLVSCNYSEIMKRWYEKD
TGGT1_262490	C. tyzzeri isolate UGA55	CTYZ_00002162	Phospholipase/Carboxylesterase	-	MPSEKKGILFCLGCISVIPGIKNQLVNSMSFHPPIIKGYKYSKCGNSIVLFDFHRKRYVTLNEMKKNLINIDPGRCQIQVKFSSINSIDFFYYKNPAAKFTIIYSHSNATDIGYLFGHLLDFSHKACVNIISYEYNGYGQSKKKTSEESLYENIKTIVHYSINHLKLPSSNLILYGQSIGSAPTIHFASTYNSINIAGIIIHSGIKSAVSVICNNTNSKSLPWYDAFKNLEKIQKVKCPVFVIHGTADTVIPFNHGEMLYKLSPNKYTPWYVNGANHCNIELNWRDELISKVKQFILYLSPKPKIQSSKSSYFTHDHTLSISRISTLSSQGFENLYHELDHDDDDDDDDNNNIYDNYQEYESTSHEYTNNNKDSCYYREKSYPIPKNHTNNHLNYHNTT…
TGGT1_262490	C. tyzzeri isolate UGA55	CTYZ_00002163	Phospholipase/Carboxylesterase	-	MPSEKKGILFCLGCISVIPGIKNQLVNSMSFHPPIIKGYKYSKCGNSIVLFDFHRKRYVTLNEMKKNLINIDPGRCQIQVKFSSINSIDFFYYKNPAAKFTIIYSHSNATDIGYLFGHLLDFSHKACVNIISYEYNGYGQSKKKTSEESLYENIKTIVHYSINHLKLPSSNLILYGQSIGSAPTIHFASTYNSINIAGIIIHSGIKSAVSVICNNTNSKSLPWYDAFKNLEKIQKVKCPVFVIHGTADTVIPFNHGEMLYKLSPNKYTPWYVNGANHCNIELNWRDELISKVKQFILYLSPKPKIQSSKSSYFTHDHTLSISRISTLSSQGFENLYHELDHDDDDDDDDNNNIYDNYQEYESTSHEYTNNNKDSCYYREKSYPIPKNHTNNHLNYHNTT…
TGGT1_262490	C. tyzzeri isolate UGA55	CTYZ_00001706	Prolyl oligopeptidase/Peptidase S9/Alpha-Beta-hydrolase fold containing protein	-	MTDFSEKNLEYRLDISEQQAQDQGKGQEQGQGQIQNGNKIPSGPIIATLCCLSALGLRGKLVSSFSFFPPKLSGLVLRDRDGSEIEFKKEYICMRFGLEKITLRSVTNIEKRLEDLLVGERKADIFCTWLESGRSKIPISCISISPVHNGDGTREKIPAFIFSHGNATDIGSMLPWFVNLSLKLNAHVLAYDYRSYGLSKGKPTERGIYADIKAVYEYARDELNFPTDRIFLLGQSIGSAPTIHLARKLRKKLKKNTGAGTTSDKSNIDCNRSGLPLGGIIIQSGIASGLNALLAPDYKKDIPCDVFPNYRNIRKVPFPILILHGTNDQVIHISNSKKLFENAKENKFHPPVTTWWIEGANHNLPGPNPKKEYYQKIGAFINSVI
TGGT1_247690	C. tyzzeri isolate UGA55	CTYZ_00002993	Phospholipid-transporting ATPase	-	MVKITNNENERTIILNNKNEESFIHSFKRLNVIKTARYSLLFFLPKNLYDQFNNVANIYFLAIGIMQMVPSISSSGGIPTIALPLICMLCFSAAQAAYEDWKRHKADSEINNLPTYAYDPIKGNFAVTKWGDLKNGDLVIVKNREIFPADMVLLASSQNDNRVFVETASMDGETNLKLRESPRILFNNGVRNISDLLTISKGIMYCGEPNDHPKKIHINSRFVLKNSKDDEKELNFSCNSSNMLLRGCKLRNTSWALGVVAYTAHETKIYQSSFRSAPHKMSNVQSLYNQVTIASFIFLLFICLSFGIIVACIDYFGGPELSKKFIPIGKMEPNESVIKTSIITFFTWIIVLANLIPIGMFFYLVISKVSQAIIIASDSRLTNQNSTVVRNSDLNDELG…

## Sheet: Cyclospora
Input Ortholog(s)	Organism	Gene ID	Protein name (Cyclospora)	MG	Predicted Protein Sequence
TGGT1_262490	C. cayetanensis strain CHN_HEN01	cyc_05024	esterase lipase domain-containing protein	-	MACVASARQIDSTEGTKKLVAVLAAVAALQPAATTALHNSGSDQTGALAGSAAGTQQRTQHPVSICGCSSISSSSHSRMVTDLPAQGATSFRCLFLPFWRKGSRAGWEAPDYEAKTYEIRSSHARRFQTCLIGTSHQLSNGHTRAIGCCRPPKLGSSEPHLTCFLLQQKRELPQQLPTALCPACTTVYGDWNGFCNCNVKDSSTADAIPPSNNLLRIPSCSSHNSSTISLKVLQLTTASGSIIPALFLHHPAAKQTLLVSHGSDKDLGCMYPLIVSLCRSLSINVLAYEYTGYGFCCCSNTKKQEQQKQQRRLCRASLAGVYNDIRAAFVWLLQHQQQTPLSIILYSEGRGLIPALWLRTELVAEGLQLGGLVFVCPAPTVATVPEEQDTEKERRKGFI…
TGGT1_261440	C. cayetanensis strain CHN_HEN01	cyc_08195	arm repeats containing protein	-	MAEAAEAVTATARLPVGTHSLPVIRYHGGHFTLLFGLRGSVGQSPLLFRLVEEASVCAEESNRVRGSWLLRNIDPLLPSLNGGIASLHGFSSSSRRHQTPYTSQRAAYTSYTTKSHCSFQATRELGGPYLIWSEQSSPFTLTFTTTSTQLGCYKGIAKLLEPSCLVIYLFVVSLAYMAVDCVVGDDVVRFDRAYDNNDIPEFVRLCNSTCEIEKLEERMHPWAADPETIGALAATQLAIFASREQEPQLKDEIREAGGIEVLVKLLASKELDRKHSAVVALSFLSVDNPQNCIAMFNAGAMPYLIQGMKSDIEGMRAACAQTARNIYVLDIKYRRTFMKGGGIAQLVRFLEIPPNATNVYTQLEAIYHLEDLVGNENEELPEFVQAVKAAGAIPKLKKL…
TGGT1_311360	C. cayetanensis strain CHN_HEN01	cyc_03114	cGMP-dependent protein kinase	-	MAENDHPFIIRLVRTFRDKEFLYFLTELVTGGELYDAIRKLGLLGRYQAQFYLASIVLAIEYLHERNIAYRDLKPENILLDSQGYVKLIDFGCAKKMQGRAYTLVGTPHYMAPEVILGKGYTLTADTWAFGVCLYEFMCGPLPFGNDAEDQLEIFRDILAGKLMFPHYVTDQDAINLMKRLLCRLPEVRIGCSINGYKDIKEHAFFSDFDWDRLAGRDLSPPLLPKGETYAEDAEEGGLELEEDEGLELEDEYDWDKDF
TGGT1_262490	C. cayetanensis strain CHN_HEN01	cyc_03069	hypothetical protein	-	MAKMGAALSRVVFQPPQYPGGPGTPPETSDLVTLTTKKGDTIHAFHIKGGGGTLTLLYSHGNAEDITLSRGYFQQLAAFCAVDVFLYEYVGSGPSVHLCALHPLGGLILQSALLSVHRVALRLRLSLPGDLFKNIEKIHKVECPVFSIHGTNDEIVPVAHGIELYKKARLRVSPFWVEGGGHNNLELLSRREFFFAMSRFLRLIHQRNQLQGHQQEQGHQQLAAPAAMANEA
TGGT1_290200	C. cayetanensis strain CHN_HEN01	cyc_01687	putative opine dehydrogenase	-	MALPSATCSAQEKGSSSPSYCSAGANPSNSNCCSTQGICNKNDTWVSQGVQIPYAMCICIVGGGNIAGAAAAWLARQHKNLCVHVLTRQPGRWTRNVKVRANPLCRWASMEPYEANIKVITDDPAVAVSSASLVMLAAPAHVHLDLLKKVKPYLKPGCILGTLFAQGGFDWAVESALGTTQCQLSAVFGLQHVPWLARWEEYGKSVEIIGPKEFLCMAVSPPCARSMVQMIMQFCFDQPCKLLPNFLSLTLTPSNQIIHPARYYSIFKHWDGVRAYRQDEISWGLYTEFDAEAAKYLALMDEELQSIKRALIQKCPDLDLSTVRPVQERIVEQYGDDVKDRSSLQTVMSSNKGYASCRTPTIAVPGGFHPCVQGRLFQEDVPSGLCVLRCIAEMVDVPT…
TGGT1_292120	C. cayetanensis strain CHN_HEN01	cyc_05953	hypothetical protein	-	MARIGAWCKGAPAEAERLPARVPLEMQQEIERTTLLTSKEIQGLYDRICSCTHLPASGDVSPCVISAVSLRYATTRVLRYRKYAPNGRLLFSRFCDTLGVLGMLDDTMIAERMFRAFDQNKDGELSFTEFATALGIMMRGKDDEKLDLSFKILNPTYSGTGECLEDYRSHSASSSDTENAVPADPPRNVDSRPAGSRASLEGTEGDAIPGDGDVAAPTAAELSSSQDVRSVSEEGPEIILPRSFGVSCSTLKGQQTRPLAATVSSPARGSRDMRWFERHKAVIYADSLGLEEFMDLVRCLQASRRALLGGEGIVAPDEDIATVFLPLASEMPDGSRRMLLRDFKRAVLCSPRFLCLLGVVSNGGAAPSFYPGESLWTPLQQSRSRYSLEGRGQSLRKKT…
TGGT1_242070	C. cayetanensis strain CHN_HEN01	cyc_04153	cyclic nucleotide-binding domain-containing protein	-	MASAAPLEANLASAYSLEASQEEDEESEEDESNNTQEQVPLEQFAPDEQFSVTLELLQLPPEERSRENVGYKLVECIFQLVKDNKFFSELEAEMSLELSDNWYLILSGSAGVYIEEIKDSIAETEQGGPNSKKTQPGTGKEEASKIGRPGALGSDLVGEISKYRRVDKNSCVANLAEGHSFGELGLIRNDVRSAALLTHSDCLFLTLDKKSFQHCLGNFLKQKSDDKVQTLRQVLPGAKELRKLVVEQLTYFFKEATIQKDMALSTEGNKEDTLYLIVKGHAVERALSGQKDKSGGTADRPETAGACGGLFGPSGQRAQNLSSVHGGNNVGSSTVLLEELDLALLQEGCLAMQGTRDFTTAENFGGREGEIESCHTVLPLTFSPFLSKRMRDYINASAL…
TGGT1_235490	C. cayetanensis strain CHN_HEN01	cyc_03634	hypothetical protein	-	MATSATAFAEELQRLQIQRQPYELQDAQQQDKQQQDAEEPQEHLQEQPQEQDSEQQGEEQHRQQQQQDSPKADKESQSPTPFEGATRCTTLANETIDDYLRQEPSWLAVFTAGHAPYTANLFCSLLSSVVTYDPVGYGLPLGNLFSKSEPEEFVSAALELLLVLLDYNPSVFSEASAADSILSRAPHPLLAPPYHKQRVSAVFVLQNGYECVGPGHTPALINSLLTALCNISPFVKTFGWESCVKLLHLLERLSKPSWLFKAPFHCQDVLFLVDTFNNLLQYQYEDGEGASQDWVPSQEWLEEWKAKSRGPLRTPIRLIQHLLPLNVYPLSYAFFNPCHLALLCDLTIQKPEANFLDGAYSDLLSVPCSCLQVEAECTEKGLIDQSQILEFLQKTTMVG…
TGGT1_281580	C. cayetanensis strain CHN_HEN01	cyc_05673	protein phosphatase	-	MAVGSSNTKLNGGDGVSATQGSKGYAQVVGADSSSRKALSFSCSNNEESTDNPARAVTAAVPHEVSAAGAVSHAKAPLKKQTSTVEQRRSHEEKAWLHLEDITAQFLLEHFTADSPDPTRCAVLGFPARERQRGFDNKRMDCVLSATEGCGNFDEFQTQIGVGCSCKKGLKPESPNQDDFSFIRCSAFGVYGVFDGHGPSGHQASDFVHRVLLLMLLSHPLLRTDLSTHKALLEFCSEEKNVDSSLSGTTATLVLHEAGRLTAAFVGDSRCVLAKMNRDGTIIPAFATVDHKPTNPLEKKRIEAAGQFAVQDAGEGRFLTSLPCAHGRLMQVMPRASVYLELPARYGQRVVWGSKSLGGEVMRLDCDIPHRVFVKDHLFPGLAMSRAIGDGIAHQIGVI…
TGGT1_309990	C. cayetanensis strain CHN_HEN01	cyc_06195	hypothetical protein	-	MCQLCCNPAGEKSCCCFNLAIGLLIIAAYFGVIGGLDIYQAKQTIPYSETQFVGGIINAVIGGYVCLCVGLGFLKLGLIAYLFTFVAFIVTLANGLFKLIAFIIDWVHWGRGLSDGTIEFQWVMVTSSLTQLFTIGVVFGFANLFWSAACVFKAGGNGCEFKTYKQIEAGKGKAAKTLDEEV
TGGT1_232340;TGGT1_267100	C. cayetanensis strain CHN_HEN01	cyc_04079	protein phosphatase	-	MEDAHLVLYAKRIAATPAASAAASPAGQPSAAPSGATGPSLAVTDGSDPDNSQHCDENSAHGRRLVVGGGQHYLSHLLLGMGAGHSPKLTEGYVFLPSTAAEDSRDEAHCEHSSSGAAAAAPFCGSPEVADCSDEAPEGKGLLGDAAEGGEGATTATHKKGNRGPKSMLRQFSIRRKAHPVCATSSEAEPPEGSVGPPGRDSAASLDTSDIQLLSQADLCIFSVFDGHGGAHVSRFAALHLRSLLDAQPAFHKGDFSTALRTAYLRIDELLRFSDAPEVLRGTAQHSNSTDEPEISRGGAQQGNSTTTTSAPTSAAEPVFETSQQLTCHGSLPFLPHPDSQAAAAATVTASEPPAAAAAGAEDVSVTAPHAAAATPGAGDDVASSKKGKKGGLTGLVDA…
TGGT1_232815	C. cayetanensis strain CHN_HEN01	cyc_00746	ERV1 alr family domain-containing protein	-	MEPADTFRCPSPSTAISSASWIKGGLQKLARAASSLMLSRHNSTLSLPRHRHAAPLRLQHAPIASSGAPLEPGDPVGIEGAEGAQRGAPVRESAADSDSSAGSRLPGEGGTEDAGKEIPQLHFCDYTNEPEDVCNAQWLVLWSYAAYAPERANAEEQQMLRSFFEFFPDQCTQGPAANCYTDAVRNTPPKVHDRRELLLWLCMVENQCRLKAGIPLKQCRHNELLKRWRYMDGYV
TGGT1_242070	C. cayetanensis strain CHN_HEN01	cyc_02292	cyclic nucleotide-binding domain-containing protein	-	METPKEQEAQSVQNVPDVEKKGSRGMMSWLRQSSIRRFRSTDTSRTPRDHKADDTVDAGETEDGVKPAPIRDTTNVTSLAAMFMSVQEPVKRELATKDRTSYQHPGAVLRTRTAQELSFPISGAESPTEPRRISSNRSVSSDPGEQSDSNGLPDESLRIHSYKSSETKSLLKEEKEHGSNKKRAHSSSSYGGICRLEFVSRTRYSLCAFETEIRRLLESNEVTAEQQPHIEDGQEKRFAIDAVAGGAGNVGQKHFLAQTRRDMDKADESTVRQMKLQGEQLILVELLQTITLVKRLLEGIKYKTKLDSAIQHDLRVSWVLNLERRGLPHPAVNRRDMSHGEEEQLKVWQRQYGALQENKGLLENLYKRVCTSRNGVLRTYHDECIRLNQSVQLLTDRIA…
TGGT1_293470	C. cayetanensis strain CHN_HEN01	cyc_03473	hypothetical protein	+	MGAACSRPAAKSLGGPAPEEKRALGGKAEETLEDVKNAASERAENIKVAAESLDCVKEGITKSPEVEDLKNRAAEAADAAPPKVVLKEDEAMPGGSQQGSKLLLSHADQQLLDAAKQQVAAKTATASTSASAPPANSPLAYLFFASSLNEGSLIQLWAPSPMTPEQMKEKQYVLLASLIPARHKKVTKNKLTVNGGITCFQQEILYYEFLLNWSVSVIRGGVSCFLQLSAADPALQHQIWYKWDIWSKAQRQPYYQGWVKFLKAADEMEATIENKVIPITEEQDLKISVFSFVSVVPPPSTYKPGTNITPKRFGDLATESGGAYIQLSRRGGDAVFDEADVVKWLAAEGLELQQGGGITLDATGTYERRSDKKGGNVPATPT
TGGT1_232340;TGGT1_267100	C. cayetanensis strain CHN_HEN01	cyc_04189	protein phosphatase 2c domain-containing protein	+	MGAFLASPKTEKHSEFGGSKEEMTSEYGASAMQGWRQTMEDAHVAIPSLKALVESAHAPPSAECVKAFAELQAMDIEDIGIYGVFDGHGSNAVSQWTAANLLTIFSERLLSVRSEMEAKGLSMPRGSCRAGQSCDKELVTKENAVLCQAIEDAFLAVDERIQTPESRHALLKIFQDGQREQHGTETYLEWFLKNGGDARVIDMNGQRYIQLLVGNEEGAEGSEGPHSPDSQGQETETHESSPSSSNDDASGEGVIFWLVRVVNAADAGTKEEDSDCEKKQAADSGKSHALGRLDSTANAATDGGKSAVKTEAGPSPPAETGPCGDEASHAEEQFEGEKSASEGSEKDAEDAELSCAADAQRNEHPHPSSPEGSGATSVVVLVVKGPTPVLIVANAGDSR…
TGGT1_305860	C. cayetanensis strain CHN_HEN01	cyc_00019	CAM CDPK domain-containing protein	+	MGAGISRTKNKSEKNQQGRLLPSPAVQTPQVSPLQHPVPSPLSSIPERCVTLYHRHLSEKEKDVSTGRLRTLRAPGDPAGRHERGGLPRPHTQSASNSMEYEVKDVESPVEQAESHPKETCFSINRSNFILENTGKIQSLYDIDPTTLGSGTYGSVSRAVRRSTGMQRAVKTISKSQVKSIERFRREIDIMKSLDHPNVVKLFETFEDHRNIYLVMELCEGGELFDRIIAEGHFTEKRAALLMRQVFSAVNYLHSNHIMHRDLKPENFLFLSSARDSPLKIIDFGLSCRFKPGEFVSTKAGTPYYVAPQVLEGRYDFRCDAWSLGVILYILLCGFPPFYGDTDAEVLAQVKAGSYSFAGPEWRRVSDEGKDLIRKLLKINPDERLQVDDALHHPWIMSL…
TGGT1_237820;TGGT1_260820	C. cayetanensis strain CHN_HEN01	cyc_03318	IMC sub-compartment protein ISP1	+	MGAINSCCSVEDTEDRQVMKEPAPTAKERSQTSSKHRKDKERKEPEQNESTERKEPKEEKNRKKRQAPPPEPAIEVSQQEIKDMQTKLHSGMSITVLLKDGTKLSCTIHLNLSDNSLSISCEDKVRVIPLSDVKALLHTADQLKRVETQADLVGDSNCVALHLLESGNCIPLRFEEARQKHSFVEMLKQLKSE
TGGT1_203160	C. cayetanensis strain CHN_HEN01	cyc_00956	hypothetical protein	+	MGASASSATRTDGRPSTRPEEEWMLENVLFFDPQQQAAARGALATHSGPTVKRFTPSRAKLRNRNFRVFFNIERRRQEFLLKLVNDPTCRILLCDRAGRELKEILTSRIKYMQRQDVTAEVYVRTETGDVASLAFEFENIRECELFEEFVHFFGAKKILNAKPYSSDISDAGSESENEQSRHLAARANQRAQALQARTGCPLHGNQACLCAVERPALDFLKNSKYDSDSEAGLEEEKEMNARHAARFPVAIDGACEVGRDVRLKDLAARANGRMAARVVEWFVATKQGKDPTFPTVSESVGQAFRLEHRHVGRYIQVRASRRLEVTDRSPFVYSLAIKGPVTVDDQTARAMLVMLGKCILLYVVNIGHSLFANFPDVQLEVSFNVTTKGQDLQRLFGLS…
TGGT1_232280	C. cayetanensis strain CHN_HEN01	cyc_04833	hypothetical protein	+	MGAVCGKQKSVTEPKTRQAAVEVSDAPVGPNSNQPPPIAASAVCPNTARDKGKVDKVEEFVTGEGDGVYLMLVTENNTTSLVQQYAHSRPQVPEGDLLLLQIKPPVYVEIKESRFAVQNGKRTLKVGLSLAMGNPDGQKKVCEAVLECLRLTCAYSAYIHCYAAMEKAPFSVLLVVCERHEPACIKDGPDGSKYVTASAEGTQEEKVDAQGTAEVVVSEKVEDPANPKAEEAKHLADRAGDSTKDQETENSPTASKGEKGLTIFEDVNPVVTETTAPKLLKQVQVLRHMAEGRSPNFSLLRYMLVVPLSKPDAENVLKDGTVVDDGGMDALQKSVEKLHGVMVPTAV
TGGT1_313290	C. cayetanensis strain CHN_HEN01	cyc_01558	MORN repeat-containing protein	+	MGCTQSSAASPQGASVATAGHRNGPPGTGGGTQGDPLPEVVLQSVATAQPAGKMRPNEACALGGSAAPQLSTAEVDAPIVVGTVCTPPPAGREGGIMKVGTPPDNLQEIPGEPCGSGRVKRDEVKLSGGMTYAGTWKGSAIDGHGTLKASDGSTYTGQFVNGKLEGQGIWESPAGERYEGHWKDGKGDGKGKLTNEDGSSYVGEFKMDIKNGRGVETWSDGTVFEGEFKNGDKVGRGKIRFPDGSTYEGSFKADLIDGTLYPAAVASLAIACWSLQPEGVPEGSGGACTASVAYDAHSTGKGVYVWANKCKYDGAWKEGLMNGSGVYTWPGGQYSKYEGGFQDGLREGKGKLHVRDGRRYSGEFHRNKMHGQLFEIMPSGKKRVGIWKDGVFERWLDSA…
TGGT1_305860	C. cayetanensis strain CHN_HEN01	cyc_02331	calmodulin-like domain protein kinase isoform 2	+	MGCVPSKSKGTRTGSNAEDGKKQSDDRTQAQNSSGAEGKSGEKPQKDAMAMTPGMYIVQQRGHLSDRFQRVKKLGSGAYGEVLLCKDKQTGAERAIKIIKKSSVSAPSSGALLEEVAVLKQLDHPNIMKLYEFFDDKRNYYLVMEVYRGGELFDEIISRQKFSEVDAAVIMKQVLSGVLYLHNHSIVHRDLKPENLLLESRAKDALIKIVDFGLSAHYEVGGKMRERLGTAYYIAPEVLRKKYDEKCDVWSCGVILYILLCGYPPFGGQTDQEILKRVERGKFSFEMPDWGHVSEEAKDLVRKMLTYDSTMDDGQEATVKQGSTQKLAQAAMLFMGSKLTTVEETKELTTIFRALDKNGDGQLDRKELIEGYRKLLEWKGETGEVDEATIESEVDQILA…
TGGT1_209450	C. cayetanensis strain CHN_HEN01	cyc_00139	TLD domain-containing protein	+	MGETASRLAAPAPLNPKKLTPRQLQQLLNNFGLNELSPSKARISLLAFVRAFPGVLQGHATLLLPTLKEIARHQQLPAQPHGQSFATLSSSSLVADVDGRVPTNIVGARCSKPSKKQVEALKIANSITLQEIIDSISSCCSGEAPETEVLLTERMLGRIARAFQPRWIQLEENEHLRNALETIGGVSLAPRACVSLIQLLHLGYLEMMFLINSSSLLFQDQVARTTSGLTCNEAQELHIRAHPTRGIHATSAWDSAPALKMVFPKELNFTFAIRAMASAFAEAAAPTTIHASTPTAAAVANAAVAVTQLAAHLSDGTHARTSSVELAAQASGALLHASSSTIGSGGLRHEVFAVLSWIRAALPALPALCTLGVAAHLLGDAVFDGQPQQERRDSSTTNV…
TGGT1_223940	C. cayetanensis strain CHN_HEN01	cyc_02105	glideosome-associated protein GAP45	+	MGGACTKNKAKQPKRADPKELEERARREAEEKAAAEAAAREADERARAEAAAAEAAAARAREERERAEAEAAAAALAAEQARQEEEARRQREEEERRAAEEELRAQQQMQAAEQKESEAEGLEKQPQEGHPELEFGGKEVVAEDVASEATMETARPMHKMAEEPQYGAAHGGRKARTVTPCDMTAVDETSKYLSKRCGCDIGDGHDENNCPICQSIDLSDAPLLN
TGGT1_262860	C. cayetanensis strain CHN_HEN01	cyc_08884	ADP-ribosylation factor family protein	+	MGGALSSWFPRFFGGREVRVLILGLDNAGKTTILSPVANATEELLRFMSWPADRLHLNEVIQTVPMQITVKSSCFCRPYWRCYYPNTQALIYVVDSADVERLPDARQELLLMLEEEELKDVALAIIANKQDLPRALNEGEISMALGLPTLRDRRWSVFSASAVKGEGLDAAMECIRCCPSLRAATPLAMAPAVAATVPPCHHKSLTDCGELGLD
TGGT1_292120	C. cayetanensis strain CHN_HEN01	cyc_08570	membrane occupation and recognition nexus protein morn2	+	MGGGSNPLEVGELDGEPQEGGLVARPVITLSNGVTYVGQWLGSNKHGYGVQQWPDGAKYVGEWVGGYAEGHGVFTHADGDYYDGEWKADKANGYGVYRHADGSEYRGGWRDDKKHGEARERWADGSHFEGTYVDGKKEGPGTFTWPEGSRYTGNFTANEIDGEGRYVWADGRCYEGQWKSNRMQGHGTFTWADGRKYIGGYVADKKEGQGTFLWTDGRAFTGGWLNGKQHGPGEFTSRSGEKKRGIWESGRRIAWLDDEGNEIPDGNPSAPVAPAASANMQADTTAGGAVAAAGETAVDTNTPPAQPSRSGSSSLRAQQQRQDSYRSNPGASLESRHSGVASHTLLHTSPSHRVPAGIGILDFLPPVIP
TGGT1_297150	C. cayetanensis strain CHN_HEN01	cyc_03057	morn repeat-containing protein	+	MGGLISCQCLDASKEDGTLELIPNDPREDSVQKTTLLVGGIQYTGELKDGLKHGYGILVRPCGSKFEGNFKNGVADGDGKFFHPSGDKYEGQWKQNKAHGKGRFTHADGSYYEGDWICDVQEGWGLERWADGSGYEGEYKGGMKHGKGTFRWPDGSVYEGQFSENDIHGEGTYIWSDNKKYTGQWIHNRMDGQGRMHLADGRVYEGGYRCDKKHGKGGKQQ
TGGT1_261780	C. cayetanensis strain CHN_HEN01	cyc_06689	microneme protein	+	MGGNNSTPCSSGGSTFCEHVEKAVSCQNGSDYFWCSCQSGYEPDGQNTKATCKDIDECARGLDNCQQKGSDCVNTPGSYECGCGTYREEKGGTCVDINECATDRGGCDENSDCINQDGARQLCRCHKGWTGNNEEPGVACKDINECNENPSICPSNAVCTNLPGSYKCECGAGYEPDSSGSGCVTEDFCGTGKNACDTKFATCSLIPGSFKCECISGFYGAGTVNTCELFVIFLVSGGILWCLYKRFIRKDLHEEEDELWGNQGPTVRRKELTPNDPAYV
TGGT1_243800	C. cayetanensis strain CHN_HEN01	cyc_00837	long-chain acyl- synthetase related protein	+	MGILGVALSSAAQRHRDSTASWLLVHSLLLWIILLLPSFHTDLILTVSAHINSPGEDEQATDLGERVRNYDAAGWEPTDLENGKSPPLPQDENSAGHLDFTQSYSSQEELPSKPTDQLYQDAQNRTEHADIAFSPFEDTWIPLSDGPTTVTDKNISIKRPVVLQGHELAVSIGASLDSMVPNSQLPQRDGVHESLRLVGTWATNSVELLLSDFGEMTHLFADWQHLDMVLDLLEKGQLSSLSTVISLDASVEEQRQGAVNQSSSYAAEIHAVLYPRALSMPFNGAMLTNENVLASLGTLTDWSVGAVSIVEADRVLCVDSLASIHQRVLHLAIIRAGATMAFAHRGLLTLKEDVGYINPTIVAASGGILHLLHAAARRALKQMGRLRRFITILKLRWRA…
TGGT1_261980	C. cayetanensis strain CHN_HEN01	cyc_03767	gorasp2-prov protein	+	MGNAAPTGEAGFRVLRIQPGTPAETADFELFFDFIIQIENESLCSPDVSVQSVLKRIDAAEGRPMRLTVYNARHRMNREVYVQPARAASSLVLLGVSLQYCPFEEALSSPLRVLGVLDASPAQKANLQEGSDYILGDEKGAYRGVSDLIMAAEEHMGSSLTLFVFNKDTERVRRLVLQPCDNWGGEGCLGCDVGSGFLHRVPFSRAAKDDADGTSTAAAAVAAGLRMSPPLDVPDPTTDVLASCLLLPTTNSPLRDPTFAGATWGAPLVKGANVSPNAEAAGATFALDGFGTSAELMCLVPADLAYDLPYAAAMMSHSEAVIEGKPQPSTVLRPTAAAYDWLVSVVSLVDWLPASCSISMLAFH
TGGT1_267080	C. cayetanensis strain CHN_HEN01	cyc_05974	hypothetical protein	+	MGNAHGGFNIPGHPGGGVTPVTKCRMRLLKLERVKDYLLLEEEYISNQEHHKPAEERNEEEVSRVDELRGSPLSVGTLEELIDDQHAIVSSSIGPEYYVNILSFVDKDLLEPGCSVLLHNKTSSIVGILSDEVDPLISVMKVEKAPLETYRDIGGLEKQIQEVKEAVEFPLTHPEFFEDIGIAPPKGVILYGPPGTGKTLLAKAVANETSATFLRVVGSELIQKYLGDGPKLVREMFKLAKEHAPSIVFIDEIDAVGTKRLVLIFLCIFGCRAVEGFREEAAFGRTHWFCVALPLSRASALRRKYAVPLLSYTSCRYDATSGGEKEIQRTMLELLNQLDGFEARGDVKVILATNRMESLDPALIRPGRIDRKIQLPNPDTKTKRKIFEIHTSRMTMADD…
TGGT1_310930	C. cayetanensis strain CHN_HEN01	cyc_07722	hypothetical protein	+	MGNRPSYSSVPLDGYLAARASIEARFSHAAASRQRTASPSGCCGTSEDTFPTMSAMEHHPCSPHREHAKFSREMCLEQRGAVSSGLVLPPSLSVAETTDTNSDGAPDEFEGAKAAEDMFSRLSQSFTRVKAPHVRARSPLPFPSMANCSPTVSKGSDAQQAPLCNSSIAIINERDYTLNSERSPNAVGCPQPKRKPQQPAEALIAPTAGPHQTKQLGTEAGTPSGRPSGLPKACINESDMLCPLSPNSALGSISPPAVAFKGASAKSTETLPETGAPVQGTSKRFSVSYGPLCNHSPFMEGRAVQILLQLLLGPSLGACMGVCVHWFMKISDALADMCAHLSKDLEASYGKFLSPVSATLKFLPLQIAGAKGTRLDWVITARVLPPAADNVLSLGYCFE…
TGGT1_316540	C. cayetanensis strain CHN_HEN01	cyc_06738	hypothetical protein	+	MGNSCCSVDGEDKADITVQQLALAGLKDGPPKNYDAWLNTYKEGGSVEVLFPDGQRIVCKLTLDSAKKVLTLCFKDKMRPIPYKDIDSWIYGSSTLKLNSSDAALLKDPKVVGFRQRTPGRAIAVAFNDVDSAVSFVWFLERVIEDSRDELDKTSDVMAE
TGGT1_237820;TGGT1_260820	C. cayetanensis strain CHN_HEN01	cyc_08047	hypothetical protein	+	MGNSCSGCCGDSEDPLQISLESLDGTNEALVQLFKPEMEDLLHEGLSVGLILQDKSRLDCKVKLTANNSALELSCDRKSRVVELSSVKNVLYTSEQLKRVDCSAGIAPGDFCVAIHLCSTGNCIPLFFPSVREKNLFIITLAKVRSGGPEGLNA
TGGT1_299970	C. cayetanensis strain CHN_HEN01	cyc_04316	TPR domain-containing protein	+	MGNTPSSVAQGPTLGNELTSLPSHRLHRRRDNSCAYLVSGPPSQDLPVHDSYVLDMSTDTALCCGSPPQNGIAAFISREEALMKARYYKDRNPELAKQAYLFALNFQSPKLFGKPQRFDRPNTPPSCGCAFVRCTIPQPVSSCWASSQSEPQLAGGVKGKAETLRKMGSAEAVSTAIPSGTVSRLHTDDLDELVVHNPMAQRLHFGDLSSRPTGKEELGQLEDNDFKAEVHAELAELHLMCGEPLDAIECYKNAAALAPYQLAYSYRRGVVLQQLGERERAISCFRGILENDSTYKPAIFNLGVCLAEDPHTRAEALGTFEHLLAIDPNNESALDMIADIHEKDGRMAEAFAVKQRVVTLDPSNFRAARDLSRLESTLADRGEVPGYITLN
TGGT1_245710	C. cayetanensis strain CHN_HEN01	cyc_01226	phosphatidylinositol-4-phosphate 5-kinase	+	MGNWACSCSRGFWGEVEEAIFGTDASKSSEAHYVGGGRVRRQVAFDNGAVYTGEWLGDARDGYGVQVWDDGARYEGQWANDKAQGKGKFVHVDGDVYFGDWVEDRAHGHGVYHHADGSRYEGQWLDDKQHGQGMEQWPDGAKYEGQYQAGKKCGKGIFTWADGSVYEGEFSNNDIHGFGVYRWADGRKYEGQWERNRMHGQGRFQWADGRVYEGQYHQDQKHGKGTFFWPDGRRYVGSWQNGKQHGCGVYITASDEQRVGEWEEGRRVRWIKEDAHSAQANDAGESSGWEVDTERARNPTIKEYNACVQVGSVDTPVPPCRPPMVARKPGVMSSL
TGGT1_277870	C. cayetanensis strain CHN_HEN01	cyc_02364	hypothetical protein	+	MGQDQSTVLSDERIGEEEARIRPRNKMVTTRQIKVVKRSAPDQFMEKADVIDHIKPIREADMAAKKELESYEGIMELSAQLKKEKRKEEEPLDLKVEIEEEPVTIFREAAHPVAIEGECAVNCTLQFRDDSPYMREFPVYKIEWAESLSVGEATVFSIAALAGGGPDTPLIIPSDSLGKYICVRAYRQVEDQFETTKLRDNEAGMYDAHVAGARTAKILAPKQFVTVVSTSIVGPVLLAEDVTVLILKALARGGFSCAVKLRDVLDSADRAVPLERDPVKAAKAKKKIPATLLVDFRMLELRYPKSCIRVDEDGLIHLNLTKEPMGTEFAVIEQPLDVISVRPSKGPNTIVLALVFNTHGYEHGGTQQLIRFDVDPAVGRDLALHQCLAFQAVRKARLT…
TGGT1_313380	C. cayetanensis strain CHN_HEN01	cyc_04027	hypothetical protein	+	MGQGLTTQEKHNIKREIYTLYPGLEQQLEMAFSCHDIEGALALPYATLEPVIRHLLMQYGLIEYVTRFSKESGALDPSHIRHELAEFGVATTRLFGDAALSVDDFKSLAVVWLKKILDTHADDQAEWMEKLRADQEEQSANYARAMKEFQEQYVKQQAIYQQGLEEQQRQIQDWNRLLEDAQKTQQQIYDEEVRRMKEIQDREARASEIAQQEELELIRKYQHKLEEIAKSEGGKCFVYPASKTPYGACASAGAQEPCRRKRNHARKENRLAKGCC
TGGT1_305860	C. cayetanensis strain CHN_HEN01	cyc_05724	calmodulin-domain protein kinase	+	MGQQESSLPGENRSRQPQQAATKDDKLAATPGMFVQHSTAAFSDRYKGQRVLGKGSFGEVILCKDKVTGQEYAVKVISKRQVKQKTDKELLLKEVELLKKLDHPNIMKLYEFFEDKGYFYLVTEVYTGGELFDEIISRKRFSEVDAARIIRQVLSGITYMHKNKVVHRDLKPENLLLENKRKDANIRIIDFGLSTHFESTKKMKDKIGTAYYIAPEVLHGTYDEKCDVWSTGVILYILLSGKANRAGKEERWGEGEGRSCLSSGFIDVSGLFALSPYKPLKWKKVSEPAKDLIRKMLAYVPTMRISARDALEHEWLKKTDADTDSIDVPSLESTILNIRQFQGTQKLAAAAMLYMGSKLTTNEETVELNKIFQKMDKNGDELMEGYVELMKLKGEDVSA…
TGGT1_262490	C. cayetanensis strain CHN_HEN01	cyc_06937	alpha beta hydrolase	+	MGSLLDRLVFMPPPKTDISLYPVEYLRTAKGSIIPFVFIRGSSPLTLLYSHGNAEDLGGALRYVRGFMAALGVSICCYEYSGYGHSRGQGPSETHVYADIEAAFNQLIHRHHVPQEQIVVVGRSLGTGPSTFLAAKYPGIKALVLISALASVYRVSIPVQIQSLPGDRFCSIDRMLKVKAPLLLLHGTNDKLTSPEHARALAEKAGAEYSVCCFLSGATHRTILSSDWRPIINDEIKQFLINTHPPRSSSTNPKEDSRRPRTTYMRFKEKPTFSRASIE
TGGT1_306660	C. cayetanensis strain CHN_HEN01	cyc_09132	unspecified product	+	MGTDSEASHLSVFLEAVRQDWYPEDWVFPNVRFELTVVNVRDPKLSVTSWAHWTFSSEATSRGWQKMISHARLTRQSGFLDDEGTVLVRGKAEPPFACLWSRGPLYRPHRAWEYIPERAAKALEEVSSSCSVAAAALAGGGGGAPSPHQGPPPAAATHRLKAPSASLLSYVDPIVPALQPSLGADCVALFIHVSRASRGLFIRQAF*GEGGRW*KGREGKAVEETRRRAAKKERGWGERAALGRERKKERXXXXXXXXXXERERGRQKERKRLRGYCGQQNGKRPAVEPSCSPCICVDFSPYVCIFVNLYIHMYMYICIYICICMYISVCVCVC**CLFHLCEFRRHIYLWGADQISYPSPEALAADPSLAASIPSFADGSLIGALQHTFAYMQLWPMT…
TGGT1_311360	C. cayetanensis strain CHN_HEN01	cyc_03137	protein kinase domain-containing protein	-	MHKDDSQAEDARLLGHLEKREKTPSDLVLIRSSLGSNLVCSSLNEAEVDALANAVEYFAFKAGDVVTQQGESGTINGFRCWERWECRALGFNVLVNDKVVNKVMTGQAFGEIALIHNTARTATIRTHTPEAALWGVQRQVFREALKQLSSRNFAENRQFLASVKFFEMLTEAQKNVITNALVVQSFQGGQPIVQEGEKGDVLYILKSGKALVSIKGKEIRVLQRGDYFGERALLYDEPRSATITAQEPTVCVSIGRDLLDRVLGNLQHVLFRNIMLEALQQSKVFASFPADQLGNLIESVVVKDYPENYTILDRENRTKQASASAFFSAQGVRFFFVLEGEVSVFSYAEKAGGARSGEQDLEAHLIETLKRGQAFGDEYVLAPNKAFEHCLALLTASAL…
TGGT1_249970	C. cayetanensis strain CHN_HEN01	cyc_00715	hypothetical protein	-	MHLAEQRELLQLSRVVATEALRKRGGDSVLYSPKQLTWVPPKGPSGAPRLDRGPFEETSELQGKRRASEREGVPEEEDAAGQRLQKRRRESDGAAASAAMKASAARMPTPPPAKVAASAALLSAQWYGGISCAGLPPSGALQDASSGGPETRQQEGQQQGPAALPVGPPGQVEGETKPVFCPICNGLYKELPGGGPGDGLHWIGCDCEPRLAALRSELVVNCLVVWELPCASRRLALRLAGGSLRWFELSALASLLVAAAVLCCCTGCLQWYHWLCSGYTDDHPPPADEDWYCYFCATRIRASIEKKNREKAKGAKRLVLAYRYRGLLVAAAMGNTMSCFDRWGKRAPDGPLFAVKKSGGESGKSPSAFNVGLGSASTTASAGSSSASAAKSKAAAPAE…
TGGT1_247690	C. cayetanensis strain CHN_HEN01	cyc_02265	phospholipid-translocating p-type flippase subfamily	-	MKGKKRLPPNAPWGFCVVFEERCEEFAIRSRFFLQKRSSLGGCVYVVLTNGRHSPGKPWTDDIRRDFYLWFSLKAFSWLLSLPLPRLCVPNALQGGSKSSGNETERGPLLHRRSVLKGRYSQERGVRYKEGGEGKEAIAPPLGGPFRRECETPGSDERGPLLGWGAPPQEFGSLETLHSQRRLSDKSAEAQFFFCPHRLPRLATTLGNAVNMGNFLRRHKTDPTSDWTVYLNAQQRQESVTNEVISTTNGTPTLALPLAVVVTVNAFKDAYEDIQRHRSDKLENLQVTHSLPRNAADAAEAARRDTRQKQRAADAAVRQGLRAREGDVYVSESEGYLDLLLEQRQQQRQQNAERDRLAGLGLVSRKWQDVRVGDLVVCFKNEAFAADVLLLGSSDPKGL…
TGGT1_305860	C. cayetanensis strain CHN_HEN01	cyc_06607	CAM CDPK domain-containing protein	-	MKNRLLNLARHHVPSVTGKPVQPDSSGQQDPVVVKPAAAMKTEKRQDDGGAMCLTQPRVVHFERDKQTREPARGFITRSESYLNASAASRWEVDELCGGAPQGKEPACSGPVFDRSRFVQEVQLDGSVTINDIFDFSHGQNLGKGSYGQVMKARDMKTGTTRAIKVVYKPRIENVTRLKREILIMKRLDHPNIIKLFEVYEDEKNLYLVMELCTGGELFERIIKSGHFSERYAACLMRQVFSAAAYCHANNVMHRDLKPENLLYADSSPLSALKVIDWGFAARCGRSHKFSSVVGTPYYVAPEVLFGKYGSECDIWSTGVILFILLCGYPPFHGKDNQAILKKVQVGEFTFDPRHWKRVSEPAKDLVRRCLTYVPSKRITAQEALQHPWIQAYTAGHGG…
TGGT1_262390	C. cayetanensis strain CHN_HEN01	cyc_05553	hypothetical protein	-	MLAFVADAVINAWEEALDRTAEFPVMLSSSITSGLEGSVEQQQQGDFWYDEGNVAALAAPQQEEMKGPLCSSSFAPYAFAAPVLERPPGAATFVSPHIAAQICMHLPLMISMKRWHLAFCLKLHGISFQTFFRRVSHSGGCVIAVEDSEGVVFGAFTDEFHKSYKYYGSADTFVFTFKGPDGKQPAENPSIHVYTWSSSNAFFCFTDGETIVVGGGGHYALTIDRDFLRGSSQCCPTFNSPPLASSQDFILRNLQIVSRVCESRMLARMHTAGCVGIAPACIRVRSPDSSVPSESLVGANQLERPPCLEDFPAKPATQGAASAATEEGSRRTALRLCMARHIYE
TGGT1_292120	C. cayetanensis strain CHN_HEN01	cyc_00908	phosphatidylinositol-4-phosphate 5- phosphatidylinositol-4-phosphate 5-kinase	-	MLGVLAMLQETQIAGRLFQAFDRDHNTELNFTEFAVALGTMMCGSEDDKLELAFRILNPSFTGTGASLSDYEFESSEGEAESKTLEELPVSPIESANGAPLTPCDSSPDGMPPDATVAGMEWKTQAVQMQQPRQRHLCVHDDHSQGHSPPLQQKRKPRVSAEAFARIQHVVYADSVSTSDFVQLIRAVEASRKILVGDEGPPIPQSEIEAVFLPLTTTLPDGSKRMMQADFRRAVRNSPSFLALLGVDIGGAAADTSAGGQAAKAWDETTDMERVKTEGIFCIDNLREIERQIQTLKQATFVSFVPERQPEDSSLPGKNLTAAAVSSPLIEITEAQEALLTPRGTSATAETEAAAAAAVAAVKCTEQKLQQIIATALSYARGSGDSPVLQQQPQQQPLQ…
TGGT1_207460B	C. cayetanensis strain CHN_HEN01	cyc_03903	rab5b protein	-	MLHSSQNLLPACRFGRPETRNPHSAFDHSNLRQSNDQNSSIRLGAAAAAGLGRQDCAMGCGFSSAHSAQGDPQLKVQNATQGTSSSRLSLEGKIVLLGDSGVGKSSLALRFCRGRFPLYHEVTIGAAFLQQTVRLDQGNQLKLHIWDTGGQERFRAMAPLYYRDAAGAVVVYDITAPSSLEAVKFWTKELRQHLDYCSITVAANKYDLLEVSAEGGLEEQQQHHEPTTLPAAAAVENEQDRNDLVEIMRGVEEVKKYCSANRFEFIECSAKTGQNVNRLFEDLARNVFAHLKDAAAVVDL
TGGT1_269990	C. cayetanensis strain CHN_HEN01	cyc_03721	hypothetical protein	-	MLSGELTRISRGLLFHVRVYGMKARGLDASSHTTATSLRLEWAAPLVEEAAPTPPQEASAVPRHDEHQLGEERSEEAKDQAKGEEHLEASADGRNGGEVLVLTTQPARGRSPKWFDSFEFTWHSPSLAELHRRTLVFSVLEVASPQKGAGGGEGGPPXXXXXFGGPLPSPASCPGRVIGSGSVCLFAVATGPLHHDVLLRAPGEASQTGRLIMDVRMQQICDLIINPIEILAHLSDSAGKSSPPGMEDEEPGPLSAHWLLSFSPTGVDNPRDAFSVATENVEQPYWNAVDHILLGHRLNVRALSEASVASAPEGFTVPPDRRAEAQPAVGSSSSRNHCLPDACASGEDAALTSQSSGADGRENSTNTKNNNSNTSSNQNENVGKQHVNDEDDKEIPFRA…
TGGT1_269990	C. cayetanensis strain CHN_HEN01	cyc_07141	hypothetical protein	-	MLVCFSADLARGEGSVRRVAAAVERERRGDAAEASYCAVLCAILRRGELDLGTVLPARPDALAALTLSEVYVLYSSIKAENAEAAAMAAAAASSASGCGASAAGGGSAAGGEQKLKLFVSQRSVDFDASAASGGSAAGAGGKAXXTVKQQQQGNRLTLASGLLLPRLGGGDGEGPRGYLGAALQRLKNAGVAVVAAGDAEAAVHLGRELTDTSKGRLRESDELAAWKLQHAEAVSRERTEQLNRFAKSLSAEDRFSVILYHKRLKLCRQFRLLLQRALAVALRMLGGEASFGGQRRFACLLLAAAYFRLPDFRRELLQSVLTEEGRSASVEEWRGTDFLLDAASLEEAEKWGASSPLRVLLQWEVFHSTLKEYFGEGTLQEDIDAMQGKLSPESDWRKE…
TGGT1_242070	C. cayetanensis strain CHN_HEN01	cyc_07024	CAMP-dependent protein kinase regulatory	-	MMLFSLPDVILLQKYETWDGFTDGETASAVAENTAIFPTHKNVDSCKDRCHSVRLGLHEQSRGGVRCGLQHASNSVGKMAAGSRSCGTSHGGSHSRKQMQKGSAKTPVACFTAFHVPTAVSGSDSNENQGQATSVIMPSHAFPSEQSPREAQVASGESLNAGTALAAANTCEHGPSEMKSALNQVNKEVFQAQPLPGYTSHYPADSAELLGLSAIVSTVGSWVAAAFQQHESDDEDDTDTEDHQLDNYGYESRAVIFDGQKGTEKAPDVVITDTAACQSAATAGSSASSIAVGESMALLVTLEPRYGGEEPFEKLTSQKSQPDIMLHLCGQPAPILWTPDDSAPLESNEVLNSSDLGDDAKSFDAHFLHVQTSSPSARGGVLNPPVPQTSLHQLADDIE…
TGGT1_232340;TGGT1_267100	C. cayetanensis strain CHN_HEN01	cyc_08815	protein phosphatase	-	MQQRLGPRLFKESAFHCSAAAETDRVEVATAKDAAVGVLSTDSPRGGSDASDEHPSFCLLSTAPSATKMTLSSTSVLTVEEEGMFYAYAAAPAASIESARGVEAAAEAGKFADEASAASSKVTELSECDVLDRGGEEFVEDVATAAFPTPPRPLANGARVPPPLDGDARMSLTVLSHSEGFPVVPLHAHAAPAGMTCAASSAAAACNEHLGPAVATLEEAALISRSPSPSPLQFTCTEKLSQLSADAVTSAQAAADSLSTAADSLSTAADSLSTAADSLSTAADSSSTAAEKTAAIVPSSISFAAAQAPEKGPATAAAAEASPLKAETAIRDTARTPTSTCILSSKETSLATPTPPGPPKVAPNAVAENTPERILGFFSPTVQKAGELVEGTAEVAAGG…
TGGT1_320760	C. cayetanensis strain CHN_HEN01	cyc_03385	hypothetical protein	-	MRGLRQADKRIMKTDSSTKQQISVDQTTIGKAGTDSFSPMVAAVRFPRINSETRVAGKDGTSLLVLELLQERAQLRALGITKQQSQARTPRCSALCYFSPEVEYRTACPMPEASSRRRLECSLFLNSAPAWNLTEASIEATTSVPKGVTAGASVSGWLKGALQTGSLSEWLRSAYAPVACSATHDENVVDLLRSPEPRTFDCEAVQGGGKFVVISFVSSSLDAVLLSLMGENYLEKGWKSQLDSWWRSVEAYAPHLPYVVADLAIVRHFYYTTFVPQQTAYSFYRITAVCSIIKEKSRKGSHRWRVLSLQSVHPQREAAHLCTARRLLSGIIRLRQAPATPIFQPYSAGPLVQKRLYGEQRGCHDTNNAGSISNLQQERRERRIHSANSPLAENALNTS…
TGGT1_242070	C. cayetanensis strain CHN_HEN01	cyc_03703	cyclic nucleotide-binding domain-containing protein	-	MSAPEYEEYIQAKLTPVLESLVTEVLLAHPEDPVTFMISRLCQRAKLPDPTTPYSKENEELRQELARLREDKVLGLSFMFSCLDNKDRNTVVDAMKERQIPADMTLIKQGADGDCLYIVETGSLQCWREDGGRETMVKVVGPGDVFGELALLYNAPRAATVKSAEDCKLWRLDRDTFNAIVKDAATKKREMYDAFLSKVFVDLIKSAAVHVQNLLVQFKFEVRLLESMSTYDRIKLADALRTEEYQGGEFIVRQGEPGDIFYLIEEGSAIAMKVFEGQTEPQEVETYKAGDYFGELALLTGEPRAASVIAKGSCKVATLDRKSFKRLMGSVEEILKRKAQEYKKQPQ
TGGT1_222960	C. cayetanensis strain CHN_HEN01	cyc_01829	SCY kinase-related protein (incomplete catalytic triad)	-	MSHKKPRNGMRRENLPAVKGESAERKLSVHMGNPLLKQYHVDRELLIPGTRHARWTVPASPVLSAKLDSLFSIAAATARHIISSSGSTIHVYRGRHAERPGVDVCLFTANLRAPELAALAPDGAALQKLRSLLQQDAQLLQRLRHPRLLQVVDPLQQAKDSWVFCTKPVERSLRQLLAFAKGSPQNASDRQDLHHVASTVSGPSLLEAKCGLLDIAEAISFLHGSGQLLHLNIHPDSVFIDGAGRWQLGGLCFAVERQAHADSEGTPCVFSFGSSSAGLALAPPLRYSAPELSSAFPPRASEAADVFSFSLLAAEILGARGLPTCKDGELQDHQQQCSTLAPLRASSFPPDSLFQQAAAEAAATPATELLQLLSRGLDPDPLQRPSIEAFLGSSFLLST…
TGGT1_245710	C. cayetanensis strain CHN_HEN01	cyc_05587	hypothetical protein	-	MSSEQLLSSEELVTDQVVPQRRCLRSAAMAPAAQPGGMPAAVSKQVGMERGRSEWALEAARAAYNGAPLQPHDANGAFGANISAASPRKAECRDRGRVITEATASVSAGLHFSEGGATQKNTSTALFSKLAETLPVDQGPLTFLTWEDGSLYCGNVNGGALHGIGVYRYTDSSVYCGQWSHGRLNGYGLFISPNGFLYRGHFEADEQNGPGIFVVPQGTAFFGHFRNGRLHGLSCCVPRSESSQPLLGVWQDGEFHKAFPLHCRVADFYRRAAESLDLLNSAWTPLPIPMPSAATIEASNDDRQGQALGGRDSQLSETAVLEALCTELPSSLLQLTAAAAAEDALQPLIRQTKRHASASKPAMRTRKASVLKLHRKGNVESAASSTSMATTAEVGGSSG…
TGGT1_243800	C. cayetanensis strain CHN_HEN01	cyc_03811	long-chain fatty acid synthase-related protein	-	MSSRGGFQACLWWELFQMGVGKAPEGPCLGTRQRLPDGKRGAYVWKTYREVERLALEAGSGLLNGDLVPLCCFDSGSDSPLSLRCIGIFAKNREEWIITEHACNAFGITAVPLYDTLGSHSTQFILSETQMKTVVSDGNCLPKLLDALQQHQSQETNKDGSREPLPVKVVITLDDISDTEKETANSLHLQLLPWNKLLEMGRENMIPLTDDVQPTMESLHTICYTSGTTGNPKGVMMTHGNFVAAVSTAVEGPLSERNLYLDSSDCLISYLPLAHVYERFCENLFFSYGGRVGFYSGDTHKLLEDVQVLKPTVFCSVPRLFQRIEDRVISSLQGKSFLARSLFQQGGVQLVSPTIVHLPVGSGEQVSTPCGVLLFRLALLIVFDKFRGLMGGRVRIMLT…
TGGT1_242070	C. cayetanensis strain CHN_HEN01	cyc_00450	CAMP-dependent protein kinase regulatory	-	MSSRGKAGGRCSDVQPDKDKPLQQVTEDDLDSNEEDDDVVDELPMPSATVQAKNRQSVSAEAYGEWNKKTNFVPPVYEKTPEAKQRIQKIVDNSFLFSSLDYEDIDVVLGAFKEVSVKKGETLIQQGADGDKLYLIESGEAEVFKEITNETTQQKQTLKVNTMKEGDTVGELALMYNAPRAATVIAATDLKLWSLDRETFSHIVRDAAAKNREMYEDSLKEVELLKDVDPYERSKVADALKTQLFQAGDEIIREGQEGDTFYLLLDGEAEAIKGGKVVMEYKRGGYFGELALLKNQPRAATVKAKTNCKVAYMDRRSFKRLLEWEGGTVAFATLAESARRLQQRQL
TGGT1_305860	C. cayetanensis strain CHN_HEN01	cyc_06899	CAM CDPK domain-containing protein	-	MSTRAGTPFYVAPQVLQGKYTYKCDMWSAGVIMYILLCGYPPFHGENDAEILSRVKVGRYSFNEQDWRGVSNEAKDLVRKLMAFDPQQRLSAEQALNHPWIKHFSAPANPASDAPFSHTMLERFRSELHCTGASSTLCFLPLHEYKVMAIFAAAWPVLVLFVLVIARIRHQPCLEDVCWAAFRVFDLDGNGRISAQDLAHVLLNTDVQTVFPSPASLSHGITQAIPAMDATQQSSSPYAVVDNMSPQQQQQQMWQVKTIIREVDKNGDGEIDFDEFMDMMRKSTMLAVYEDWDITNPRWRQVSMASLTKN
TGGT1_243800	C. cayetanensis strain CHN_HEN01	cyc_02665	hypothetical protein	-	MTSDISRHRLTPFSRRLLLSVGLLLLRMHDLFEECAVLAADATDEAEVKRVSELLEVKDWKGVYALPIPGTETNETSAVYRCVKDPSNPDVTQFGTEGIPQFPHVKSPYMLMREAARIYGRALYLGERFPIRNEKGEQIELSNFKYFTFADTLRVVEALGRALDQEVGVSLSEYEAEGDSPPPSPMRILGIWSRSRMDWRLVDFAASYRGIVTVPLYDTLGEESLNHIITKTKMEVMAVEGSKLPSVLRLKESGYPLKAIISFDPPTEEQFQAFEAAGMHLFHQEKLRRKYLTIADTKTPDELKPSLADVSTIIFTSGTTGLPKGAVHTNGSLLSFVGSYMSSANRMRVSVGDSTLSYLPLAHIYQREVELVVTLLGIRIAYFSGDLLRMPEDLQLARP…
TGGT1_305860	C. cayetanensis strain CHN_HEN01	cyc_06360	CAM CDPK domain-containing protein	-	MVGGQLMEQEEARRPPSHSASSAGRHRCRLLSADSSNTTKALAAKTASFSGFQSDTCLSVGRYSHARPPGASASSTKGRAVLPGILDGGMQTSEMLALPSGEVGLCPTRKRKSLPAAEPSFSHLVDYCLPPAQGLLQIRSSAPDGHCGTEETQPLNGEAGDAAMAANSSSSLTRTGELSTPQKTCKRGGYRASTQLLQLPLAALNSSKGRRPQLLSPSLLRLMDVTNSPLSVISQASTCALLSSASSLDSCSQPATPNAGLLDSGAYSPLPLAVAPVAHKVAGRQDAAAEVSGDEGSRGARLDRRARCDYEVYVYGAAEEQNSNTAAALAGLALAGTAPTVAKAGDEPCVTSTPVMHTTKEAALSEESTVATAFLSSPSTTASLSPLRLPIPARGLRRL…
TGGT1_219710	C. cayetanensis strain CHN_HEN01	cyc_09098	hypothetical protein	-	MVLMQLRERRSCVVGTAHEVSFSQPSLDGESSAVSEGELLQSQLDIALLPASAPPSDVPGALLPAASSSTEAAQERAIGANATCVAYAVKPGVVRVVRVLDQQAQQNAAVCRFLLPDPPAGVAGSRVAEGLALGQEKPQFLLIRDSHGLVLIYKGRLESPAPKPSADRSPSADAERGGSSSTGMPTAGGGTDTTPPFVQLQLQLEHGRLLDAFWLPSTATQRRAGTGAAETAERDRSETAEGGSGCFFVTVQQRRVAVWSVPLLRILGVTLRRDPQKEPLLAEEAEAADCCCCVLPLEEAAAAAEGVLHDPFNVCTPSELPEVYSACCASREGCLLVGLKRRVVAAWQLQVRRTHHTTVRLESRKGQPSSSGSAKM
TGGT1_237820;TGGT1_260820	C. cayetanensis strain CHN_HEN01	cyc_00204	IMC sub-compartment protein ISP1	-	MVNKGVKLRLSACTQGSDIALKEFMKRAETQGLTIQVVLQNGSNMNCILVLDINSRSLVIRNGEKMRVVPFNTIKNVLATPQQLARVDTQQDITNDPYAVGLHLYKTESCIPMRMESNEDKQNLIEMLKSFGIPPQKSKKIEGNQPAVN

## Sheet: Eimeria
Input Ortholog(s)	Organism	Gene ID	Protein name (Eimeria)	MG	Predicted Protein Sequence
TGGT1_281580	E. tenella strain Houghton	ETH_00041820	protein phosphatase 2C, putative	-	FPSRERQRGFDNKRMDCVLSATEECEHFDEFQAQIGVGCSCKKGLKPESPNQDDFSFIRCSSFGVYGVFDGHGPCGHQASDFVHRVLLLLLLSHPLLRSDVCAALRGAFHAVKP
TGGT1_305860	E. tenella strain Houghton	ETH_00039185	hypothetical protein, conserved	-	MANSPAARTGALQQDKAAAAAAPAAAAAAQAAKTQQRQSPLSGDCRSKEAGEALPAAEYCSSSSSSSSSSKGLLCCGRETRGGSGCSSLLPSVCVSSSSSSSSTSCGCSWTVSSSKSSCSTSSSSSSSEAGAAAQQQQQQQDLERVRSCRNKGDEKRMQQELLLSKLLDHPNIIKTYEVFSSSSKLWAVMELCTGGTLLQHAMPPAAAAAEQQQQQQHRGADRRAHRRPVLGAEPILLSSEAAKAKAVRSIFEEIDWGLSIYKPLRSNGVAQVLQGVLEKDPRRRWSSRQVLQHPYFRGYASPGPPLHTPAAAAAAAARGALKPQEGLMLLRCFVALLIMARLLREEATLNWLRLFRLLDSRSSGALQAEELQQQLAAALLQQMQQKGLSPQQQHQQQQ…
TGGT1_306660	E. tenella strain Houghton	ETH_00038030	hypothetical protein	-	MATLPPPPTTRCILRALHLHDLQKLESPDPLVRVHTELFSLLMREIAKTSLEERGAQQQQLLQQQLQQQLLLQQGAARAAAQAAAAAGAAGGTRTAWSS
TGGT1_309990	E. tenella strain Houghton	ETH_00024600	hypothetical protein, conserved	-	MCQLCLNPAGEKSCCCFNLSLALLLIAAYYGVIGGLDIYQAKQTEPFEKPQFVGGVVNASIGGYVCLCALLGFLKLGLVAYVFTFAAFLLTLLNGIFKLACLVAEWVRWGTGMRDGTVEFQKVMVFSTASQLLTILLTLSFANLFWSAACVFKAGGSGCEFKSYRQLEAARPKPAAAADDGA
TGGT1_261500	E. tenella strain Houghton	ETH_00022045	Possible conserved eukaryotic alpha beta hydrolase, related	-	MDSCHDFCCCGFSAAAAAAPPPHQPAGEPKSASPPRKQQRTAASRREQQAAAHSSKQQHTATGNSGQQQTAAERLRRQLNQDTDWSGYCCSSSCCCCCVLVSGQKPVEEKGCCSCFHCAPPAAAAAAAAAAAAADQPDSSGKREGSNAVSDAPAVAAAAAAAAAEAPPAASFLGAAASPVLLRTARAALGSLRSAAAAACCPFLLIYAHGNGSDLKDVLPLLQQTQSKTGAAVLAFDYPGYGLSQGRASEESVDICLQSVLSFVLLHLRWPAARVVLWGCSIGAGPVTRAAAAFSAAFRQQQKHQHGRCSRLQRQLLQIAHKRQQQQQQQQHNEHHGCEQLQPRLFFPILGSNLCASSAAAAAATAAAIVPPSSATPEAVVAAQVAAAAMTNCSGAWRT…
TGGT1_320760	E. tenella strain Houghton	ETH_00002630	hypothetical protein, conserved	-	MFEFLSRLCSKHKNAPLETELRRQRKALKAIDKFVHSIQKSLKYWERSGKSLRVGINGYFYDKPVYKRPVEEIGAALDSFKTISSSVKPQVDLIKEANVAAAKSIAKVEKASKRKKDAEKKLLRKEAALKKLQQKAETGKDPQAVQKVKTAEDEVQIARNRLQTAEAELVREMQQTMNGSAPEAAMQVARALEAMILFLVGSGVDVASVRASIRLLEETQYVSPLTAAGHQQQQLQQQPYTSSKVDMQQMQQFPNSPRSTSPAEPMKRTNSQSSRPHSPSDPGSQQVTPRKPYPSGDSQRLQPTASNGNLNDSARPLASPTNPFASD
TGGT1_311360	E. tenella strain Houghton	ETH_00027525	AGC kinase TgPKG1, putative	-	MFFISQGRYQAQFYLASIVLAIEYLHERNIAYRDLKPENILLDSQGYVKLIDFGCAKKMQGRAYTLVGTPHYMAPEVILGKGYTLTADTWAFGVCLYEFMCGPLPFGNDAEDQLEIFRDILAGKLIFPHYVTDQDAINLMKRLLCRLPEVRIGCSINGYKDIKEHAFFSDFDWDRLAGRDLSPPLLPKGEIYAEDAEEGGLDIEEDEGIELEDEYEWDKDF
TGGT1_305860	E. tenella strain Houghton	ETH_00024560	CAM kinase, CDPK family, putative	-	MFFYSSSSSNSNDAKISSSSSSACGSRGCSAGESTVGTTSSSTSSSSSDSSSSSSSGTPVFPWLDDVLPSDSRWRKTRVARSSSSSNSSSSSSSYGPPHGGGCRLRAKGPPSEEAPGRHGGPLGEAYEAAAKAAHVAAHAAAQAAAHAAVLQRQAEEAYWSRKATPEVGFSVYPDLDRDIHLDYNLYCADLGDRDGESSVAAGVSSQETAAPMAVDGAPSGGPPPGDPKPCKGSQAHLVLGEGRYGKVVLAENRRTHEMVAVKMLDKRRALADEAWDCRQELEIHRRLPRHPHVVSVLDVYEDRKSLFILMELCDRNSLVDRVVADGAFSEEHAKIIFAQLVSGVMHCHVNNIVHRDLKPENILFSRELRGGGCSCSGASDCWRVPPLSPSASPYPSFP…
TGGT1_222960	E. tenella strain Houghton	ETH_00003530	SCY kinase-related protein (incomplete catalytic triad), putative	-	MFLSDASPSPVPLLSSVDWGAPGPPGTPPGAPPGAPPGAPPGAPPGGPPGAPPGPPAGGPPGRLPLDTQGSHSSSSSSSSSRRLSVLEAKRGLLDVAEAISFLHFNAQLLHLNIHPESVFVDSSGRWLLGGLCFAREQQSGSSSSSSSSSSGSGCGSSKAAGFAFSYSSGSVGVALAPPLRYTAPELAGFYPPRAAAAAAAAADPAAAAAADVFSFSLLVAECLGAANLPNSRDGDVEAHKQQCAQLSPLRASSFPPGSLFQEAAAAGAGGPAAAAGPAAAAAAAAGELLELLSRGLSSNPKERPPISAFLKNSFFLCLETRALQFLSCLQEKEQQQQQQFLAGLLQLLQQQQQLQQPQILKVHVLQPLLAALKYPALLPLLLPNIFFAAKALKDKKYF…
TGGT1_223940	E. tenella strain Houghton	ETH_00011025	hypothetical protein, conserved	+	MGAACGKNKAKQPKRADPKELEEKARKEAEEKAAAEAAAREAEERAKAEAARAEAEAAEARAREEEARAKAEAEAAAAAAAAAEAEEQARRAEEEARRQREEEERRAEEERRAQEQASAAAPVEQPAAEEAAEQPEEAEPAEKEKQVPAEDIASEATMETSRPMRKVSEPDYGSAQKGRKARTITPCDMTAVDETSMYVSKRCGCDIGAEHNENACPICRSIDLSDAPLLN
TGGT1_292120	E. tenella strain Houghton	ETH_00013240	MORN repeat-containing protein, putative	+	MGACKSKSRAKRPEEAAAAAGAAAEGAAGEGAAGEGAGGGGGWVSREEEASSPAGSAARSGAAAGESRSSSTASPSASASASGAAAPGGAAPAGAGDAEPARSPSGAAAAAAAAAAAAAGAAGAAAGNAGEELVARPLITLSNGVTYAGQWLGSLKHGYGVQEWPDGARYVGEWAFGCAEGHGVFTHADGDFYDGEWRGDKANGFGVYRHADGSEYRGGWKEDKKHGVARERWADGSHFEGVYCEGKKQGKGTFTWPEGSRYSGEFRDNEIHGDGKYVWADGRSYCGQWRQNRMHGAGAFTWPDGRKYVGQYFADKKDGAGAFFWPDGRAFEGRWRRGRQHGLGRFTARTGEARRGLWRDGRRLAWLEDAQQLQRLRAAHPELFADADAAQQPQQQQPQ…
TGGT1_311360	E. tenella strain Houghton	ETH_00017800	cGMP-dependent protein kinase	+	MGACSSKAQHQTRDPEPREQQAAQEQKSTGPSGAPNDAPAPAEAERKMSGSSATAPKGEMPTASTGTPEQQQQQQQQQQQQQEQQQHPEHQQSEKQQQHGEEQQQERKPSQQQQNEEAAAPHKHGGERKVQKAIKQQEDTQAEDARLLGHLEKREKTPSDLSLIRDSLSTNLVCSSLNDAEVEALANAVEFFTFKKGDVVTKQGESGSYFFIVHSGEFEVIVNDKVVNKILTGQAFGEISLIHNSARTATIKTLSEDAALWGVQRQVFRETLKQLSSRNFAENRQFLASVKFFEMLTEAQKNVITNALVVQSFQPGQAIVKEGEKGDVLYILKSGKALVSIKNKEVRVLQRGEYFGERALLYDEPRSATITAEEPTVCVSIGRDLLDRVLGNLQHVLFR…
TGGT1_261500	E. tenella strain Houghton	ETH_00032550	hypothetical protein, conserved	+	MGAGGSTLGETILFPSPECSYDELLPGLLWISESLAAPSSGPSPARSSPAAAAAAPAAAAAAAAPIDFEVQRNRHSSSSSFPACFIPAPSGKAKYVLLYWHGNSCDLGHIREELEILGAFLECHCLAIEYPGYGLAAAATPAAAAAAAAAAAANSGRRVRASVSDTINLWGRAAFNLLLSLGVSPSNIICFGRSIGTGPAAHLAAELLAEGILVGGVVLHAPYISVHKIVAEYAAFGTWLIGDYWSNKESLSSLSPWTPLLIIHGLEDEIIPFHHGKYLFENYGATEAVKAAAFPADSSHNAYYVIDVRPGKAHEGILEHKSQGERNSSF
TGGT1_220320	E. tenella strain Houghton	ETH_00025105	hypothetical protein, conserved	+	MGAIVGREARKEAREIDLADGGLQDAFYPWVQMIQWSCEELKKEAVFRWNLSVIKE
TGGT1_223940	E. tenella strain Houghton	ETH_00020550	hypothetical protein, conserved	+	MGAKCGKPAAKKPGRRGPQDLKERKPAEKDETEEQQQQQQQQQQEEEEERLRQQRQREEEERQRQLLLQQQREEEERRRRQEEEAAAAAAAAAAAAAAAEAERKRQEEEAERKRQEEEAAAAAAAAAAAAAAEEERRRQEEAERERQRQEEEERERQRAAAEAAAAAEAAAAAAAEEEARRAAAAAAAAKKAEKERQRQLRQQQREQQQLLLQQQQQQKRQKKFLVCEKQMKLISSSCGCSLQQHEEADCVVCRFVDLADTPLFA
TGGT1_255245	E. tenella strain Houghton	ETH_00033300	hypothetical protein, conserved	+	MGAVLSREFKEGPGARACRRLRRLWSTGYWLGSNVAWMAVTSAICLVAPVIFYYERECQMFEMQQQFMEAQQAAAQAQQLQQMAGV
TGGT1_237820;TGGT1_260820	E. tenella strain Houghton	ETH_00012540	Apicomplexan CP 15/60K like protein, related	+	MGAVSSCCAVEDADDRQVMKEPQPAAAAAAAAKEKPHSAKPRKESSSKEQSEQKSKDKERENKEAAKEEKKPKKQQQQEQPAVAVNQPEVEDLRKRLQGGMAIIVLLQDGTKLACTLHLNPSDKSLSISCEDKVRVIPLSDVKSLLHTRDQLKRVETKANLVDDENCVALHLIESGNCIPIRFEAVKDKHIFVEMMKQLKEEAEKNRN
TGGT1_313290	E. tenella strain Houghton	ETH_00041320	hypothetical protein	+	MGCTQSAAASPAAAAAAPGAAAAAAAKPPTASPAATPVPSASLLSPGGAAAASFQSNRQGSPPGAPRGAPGGASPGGPPGGFASSATRGRLQSTFKIAGSEGPDVVGTDCVPPPGGREGGIIKIGKPPPNLMEINSEPAGNGRVKREKVVLEGGSVYEGTWKEWTLDGEGTLESPEGTFYSGGFRENKFEGNGTFVSPSGLKYEGQWLRGQLHGHGKLTHEDGAT
TGGT1_209450	E. tenella strain Houghton	ETH_00024405	TLD domain-containing protein, putative	+	MGEAASRFTSPAPLNPQKLTPKQLQQLLSHFGLNELSPSKARISLLGFVRAFPGVLQGHAMLLLPTLKEIARQQQVHPHPHGVSFAILSNSSLAPDSGVSTSIMGNRCTRANKKQLEALKTANSIALQEVIDSISSCCSGEAPETEVLLTERMLGRIARSFQPRSLLTEENEHVRHSLESIGGFSLDPRRGSLQRSASGSVSSSSSRRSITYVSLGCSTRACVALMQILQYGYLEMMYLINPKSPVFQDKVARTTSGLSCNQAQEIQTKGVNARGVHTASAWDAAPALKLMFPEELNFTFAVRAMASAFAEAIAPTGIHAATSTAAAVAAAAVAVTQMPGQCSIGNGTGSGTRRGTSSTELAAQASGAILHASSGTIGSGGLRNEVFAVLSWIRAALPV…
TGGT1_203160	E. tenella strain Houghton	ETH_00007615	hypothetical protein, conserved	+	MGGAASAAAAEDPQPEEKWLLENVLFFDPKNSPGRGEVGAAASRRGPTVRRFTPSRAKLRNRNFRVAGKELKQISTASIRYIQRKDTSAEVYVRTDRRETASLSFEFENEQEAELFAEYVLTLFGIQVHFFGTKRMGNARPLDLRDRSDSSDDSIKSYEPEVMPKRQNRAQRRAQALQARTGCPLHGNEPCRCAVERPAVDFLKRNKYETDSSSDEESEINASHSLRYPIAIDGPCEAGKELRLNDLGARGYGRVKAKVAEWFAASRPGKDPVFPPTCEAVGVAFRLQHRHVGRYIQLRASRRLDSSSSNPFVYSLAVKGPVTVDDGTARDMLLILTQREVSYEVTCKGADLQLLFGLSPAAVGSSPFFDLTLTMTREALLLSVSVPSAENPVALQINY…
TGGT1_293470	E. tenella strain Houghton	ETH_00030475	Immune mapped protein 1	+	MGGACGKSRGTAAAAEPPVSAADKAAEAAASAASQAEKAQEAAAAAAAAAANGAAAAAALTGEDRSEREPANASDGKDTNPTNPTTAEQQQQQEQEQQQQEQQQQEQQQQEQQQEAAAAQQPASPVVALSAADAELLAAAQQQAAAAAAAGSNANLPHAYLFYAAELNEGSLILQWTAAAMQQQEMQDKKLLLLASFVPPKYKTVTKSKLQQNGGITFLLQEMKYKWDIWNKAQRQAYFQGWAKFLKAADEMEASLLLHPFELPAPPATVFLLHTGPIENKVVPVKLGEPIGISMFGFAAVAPPPAPYKAGANITPKRFGELATQAGGAYIQLSRRGGDAAFSEADVVKWLAEDGLEIQQGNGITLDSTGAYERRSDKKGGNVAAAT
TGGT1_262490	E. tenella strain Houghton	ETH_00001930	hypothetical protein, conserved	+	MGGAISKIVFQPPRYPGGPPGGPPGAPDLIALKTKSGETIHAIHIKSGGSLTLLYSHGNAEDILMAFSFFKSVSAALKVDLLLYEYVGYGCSSGSPSEAGVYESVEAAFHYLTKELQIPPSSIVAYGRSLGSGPSVHLCARERVGGLILQSALLSVHRVALRLRFSLPFDLFKNINKIKKVFCPVFCIHGTNDEVVPIYHGIELYKRAPLTVSPMWVEGAGHNNLEIVAGDLFFLALSRFLRLVQQQQQQLLLQQQLQQQQQQQEEQQQPPAAVVAAAEGA
TGGT1_262490	E. tenella strain Houghton	ETH_00017840	Esterase/lipase domain-containing protein, related	+	MGGDETTKAPAPGGFCLCVPCNKRSRQPWTPPDCAATSYEIRCSHSRRFLSQRSGSSGRGFSRSNSRSAGAGTPRPPKLGSTEPQLSCYMLQQQQELPQQQPAVLCPACAAAAGSWSSCFFCCAKEAPRSPASMPSSSNLLHVPSCSSQGSNSFHDSDSEIASFTASKPAVAPAATLAADTADPRQLQHSNSRNLRLHMSRSSSFKSRFPCVDCWRCSNSCTISLKVLQLQTASGSIIPALFLRHPSARQTLLVSHRSNSDLGRMYPLLLFLCRSLCVNVLGYEYTGYGFCCCTIRRNHSEQQEQQQQRRLCRPSTTGVNTDIRAAFLWLQQQQQQTPQSIILYSEGKGLLPALQLRSELAAEGLQLGGLVFVAPAATAAGAASTATGLPLSRVKGKEG…
TGGT1_261780	E. tenella strain Houghton	ETH_00007985	microneme protein 7, putative	+	MGGKSSTPCDAGGYDHCSRVEHAESCQSGDGFWCACQKGFTPQGINLSSTCIDIDECAQGLDNCKQKGGDCVNIPGSFTCGCGPYRQEKDGVCIDINECSTNRGNCDENSDCINLDGEEQLCKCHKGWTGNNDKPNVACRDINECNENPSICPSNSVCTNLAGSYKCECSAGFEPDSSGSGCVTEDFCGTGKNDCDTVFAACSLVPGSFKCECIQGFRGAGTVNTCEPLPGNEDLACTTLGLTCGDYKYCTKSTTQAGLWECTDKAASEQLAVFIANGATSDTPSWVWAVVVLSTIALILISGGVLWCLYKRFIKTREDTEEDLLAEQDFGEGYSYGATQGYYA
TGGT1_232340;TGGT1_267100	E. tenella strain Houghton	ETH_00006755	hypothetical protein	+	MGISDVGVYGVFDGHGSNAVSQWTAANLLRIFSECLLAVRAEMAAEHQQLPRGSNRAAAAAAAAGDTAAAAAAAAAEEEDSSSFMTSSVAVVCQALEDAFLAVDEKIQTPESRHALLKLFEDAQKEQMGTETYLEWFLRNGGDARVVDMDGQRYIQLMVANEDGEGENKKEETEEEEPAGEKSPQGEASRPLALGRLDSTSDIGAKAERQQQQQQQQQQQQDEEAAAGREGSSSPSSESDGEESEESPRSSSSSSSSSRRSAAAAAAAKGQRSSSPRGDPPRVSASEGAKAAAAAAGGQVTSAASAAAAAAAAAAAAAAGDGEPSSPRPGSPSAPASPPPSPSSAAAPPQPAAAAAAAAAAAAAEEELEAGAEAPQRLEHPHPSSPEGCGSTAIVCCLL…
TGGT1_267440	E. tenella strain Houghton	ETH_00016010	zinc finger (C3HC4 RING finger) protein, putative	+	MGLAHSRTSRQGSFSIRPQQVVSLARGGPTGGMTGPESQQPPLPQLSVQKTFIVRNPVNLIKSSLAASIQDSRVCVSFRFDSLCPLDVSLFFFPRQPDPQYSNEPPCMFASPPRRFGAGLQQLFEAAPQESPLASDCLESLRAKGPAQQQGEDCDLLIRLRAVSTEETAEAAAAAPAAAAAATEEGLRATAVAAAAAEGVRQQLTSVAFVLQESPHSSTSPKSQQQGPDETESPSRSSSITAAAAAAAAVAAAHDPVATMWRLCVLKQRVELGSRSFEVQEIFGIDGGPGFGRRRQATTELTNGAAAAAGDAAATAAPTRLSSGEENLSGRECVICLAEERTTAVLPCRHMCLCSESCGRCCRYQWAMEKPHFTLPRGAAATASEAVMAFAAAALAAAE…
TGGT1_276140	E. tenella strain Houghton	ETH_00002790	ADP ribosylation factor 1, putative	+	MGLSLSRLFSRLFGKREMRILMVGLDAAGKTTILYKLKLGEVVTTIPTIGFNVETVEFKNISFTVWDVGGQDKIRPLWRHYFSNTHGIIFVVDSNDRERIVDAKEELHRMLGEDELRDAVLLVFANKQDLPNAMSVPEITDKLMLYSIRHRHWYIQSACATAGDGLFEGLDWLSTTLANKS
TGGT1_237820;TGGT1_260820	E. tenella strain Houghton	ETH_00020415	hypothetical protein, conserved	+	MGNACSGCCGDSSDPLQVPLEALSGSEQQLAQHFRPEMAEALKEGLAVGLILQDKSRLECVVRLSSSEDSLLLSCEAKSRVVPLQSIKALLHSSSQLLRVDCSAGIRPSDFCAALHLAASGNCIPLFFASLRDKNLFLITLAHVRTRSSSSSSSSSSSGGGGGGGGGAGAGGAGKQEDAAAAAAAAAAARAADAADAANAAAAAAAQPSTGKASRT
TGGT1_267080	E. tenella strain Houghton	ETH_00015775	26S proteasome subunit 4, putative	+	MGNAHGGFNLPGHPGGNDDKKDKKKEKKPLEAAPPSHVGRRKKPKGAMGASKLPNVTPVTKCRMRLLKLERVKDYLLLEEEYISNQEQHKPAEERNEEEVSRVDELRGSPLSVGTLEELIDEQHAIVSSSIGPEYYVNILSFVDKDLLEPGCSVLLHNKTSSIVGILSDEVDPLISVMKVEKAPLETYGDIGGLEKQIQEVKEAVEFPLTHPEFFEDIGIAPPKGVILYGPPGTGKTLLAKAVANETSATFLRVVGSELIQKYLGDGPKLVREMFKLAKENAPSIVFIDEIDAVGTKRYDATSGGEKEIQRTMLELLNQLDGFEARGDVKVILATNRIESLDPALIRPGRIDRKIQLPNPDTKTKRKIFQIHTSRMTMADDVDLEEFVMAKDELSGADI…
TGGT1_310930	E. tenella strain Houghton	ETH_00033355	hypothetical protein	+	MGNNPSHPTVPLDGYLAVRASIEARFSSASRDSQAAAPRECCSTAGGSLQAVTHRELQKLQRQQMRQEVRSFRGSSRASAAALVEQAIAGTRLPATLSIAETTDTNSDGAPDEFEALETADEMLRGLSPSFTRAKAPQVRAQSPLPFPSMSHCSPTVSRAAETLKQQSSELSDCGRSRVSDPDPSCRATRLSAGQTSPSSTSNLQPPTPQQRPQHLAADLILHADDERHQRRASDRETTEASEGHTAGPLEGYVTGPPEGSSMGAPAGRRAAEDLHGAATRPLEGGVRNVGRERAARGREGRGHGTLAVQIEEAEMFCPLSPNSALGSCVPTTVAVKRSQQPARERENTAPVALPSRDITATSSVCYGPACNHSPFLEGKALQTLLPLLLGPSLGAAMG…
TGGT1_222960	E. tenella strain Houghton	ETH_00002180	hypothetical protein	+	MGNPLLKQYHVDREPIIRGTRHGRWTVYSGHHIDRPGDSVSLFACNLKSPEFAALPAEGPVLQQLRELLQQDALLLQRLRHPRLLQIVEPLQQGKDSWVFCTKPVHFSLRQLLGAPEGPPWEPFRSPG
TGGT1_261440	E. tenella strain Houghton	ETH_00027380	armadillo/beta-catenin-like repeat-containing protein, putative	+	MGNQCCAGRDTAYKRKAQENEYGGKLKNMLSFGTVGDDVVRFDRAYDNSDIAEFVRLCDSTCEIEKLEERMHPWAADPETIGALAATQLAIFASREQEPHLKDEIREAGGIEVLVKLLASKELDRKHSAVVALSFLSVDNRENCIAMFNAGAIPYLIQGMKSDIEGMRAACAQTARNIYVLDDKYRRAFMKGGGIAQLVRFLDVSPDATNVYTQLEAIYHLEDLIGDENEERPEFVQGVKAAGAIPKLKKLQQHRDKDIADAASLLLVRLAD
TGGT1_316540	E. tenella strain Houghton	ETH_00006440	hypothetical protein, conserved	+	MGNSACCGFEEEDKANVTLQQLALAGLKDVPPRVYAAWLQKYTEGNTVEVLFPDGQRIECRLTLDSAKKTLTLSFKEKVRPIPYKDIDSWIYGPSAVDQASADAKLLKDPKVVGFRLSTSGRAIAVAFDTTDNAICFVRFLEQILEEAREEEQPNGPKPV
TGGT1_264990	E. tenella strain Houghton	ETH_00008490	hypothetical protein, conserved	+	MGNSASADDKPKRVATKDLRCHTYVRTYREGDAELPEDPDFPKRLLDQTRSFDFSKQVGNGNGTYIFYPNKDKPKMWVGQYKCLNPGDLLCNQACPLDASTATHCNAATADCIDPAGCGLMQYCMPGPQFYTKNNGITELPGGTAYATASSTNEDQMRIEQEQVNSMAQQTYAIATGNMYAHENFEQRLAFSQSLHRSNLPCTPVMTRTYQGTVCPPNAPYQLQ
TGGT1_249970	E. tenella strain Houghton	ETH_00018490	hypothetical protein, conserved	+	MGNSMSCFERWGKRAPDGALFAPKKRNADNPRSPSVFAVPTTAAAAAANGAAAKKAPVPKATSPVERSNRRRQTYSSNAAKAADTEVSSYDEEDDFDETDEEELTTSDVRQKKLLAYRRSLTKIVKLKTHLFNATVKVTCSRDGKEVEWYKGHSGEGGKGKAVGSLPVEKITSVKAQQDNPKGLTINVNNPSPTTFSFTFKTKEERESWEKQLESLQKFMAMI
TGGT1_299970	E. tenella strain Houghton	ETH_00009205	TPR domain-containing protein, putative	+	MGNSSSSVAQPPVLGNELTTPSLQSRSRSYDDSCKYLVTGPRPQGTRVTDAYTLDVSSDAGLCCGSAPTNGSVSFVSREEALIKARYYKDRNPELAKQAYLFALNSPPTKGFGKTQRLDVANPATNCGCSFVRCTIPQPVSACWASSQFSHHGAPEGVPDISLQKMASAEATSTTFSSGNVTRLHTDDLDELVVSNPAAQRLQVGDVSGRTTGRESLRQLDDSEFRAEIHAELAQLHLICGEPRKALECYNSAELLAPEQLAYSYRKGVVLQQLGEREGAISCFRAVLQNDSKYKPAIFNLGVCLAVDPATRSEALGTFEHLLSIDPNNDSALDMIADIHEQEGRVAEAYTVKQRVVTLDPSNFRAGRDLARLESTLLDRGGVPGYVTLN
TGGT1_242070	E. tenella strain Houghton	ETH_00011940	CAMP-dependent protein kinase regulatory subunit, putative	+	MGNVCECRGRPGGRSAAEGQPEKAKALQQVTEDDLDSNEGDDDVVDDLPVPSAKAQAKNRQSVSAEAYGEWNKKTNFVAPVHPKTPEVKERIQEILDNSFLFSSLDVEEIDVVLNAFEEVVVKKGETLIKQGADGDKLYLIESGEADVFKEVTKEGTNEKETLKVNTMKPGDTVGELALMYNAPRAATVVAATDLKLWSLDRQTFTHIVRDAAAKKREMYEESLKEVELLKDVDAYERSKVADALKSQLYHAGDTIIREGEAGDTFYLLLDGEAEAVKGGKVVMKYSRGSYFGELALLKNQPRAATVTAKTDCKVAYMDRRSFKRLLGPLEGLLMRNMDHYRAVMTQLGLDTKYLDK
TGGT1_292120	E. tenella strain Houghton	ETH_00018475	Phosphatidylinositol-4-phosphate 5-kinase. phosphatidylinositol-4-phosphate 5-kinase	+	MGPRFRCVAPYGLMNYSAFCSMLGVLAMLRETQITDRLFKAFDRDHNTELNFTEFAVALGTMLCGKEDDKLDLAFRILNPSFTGTGASLSDYDFEDDNEEDSSSSSSKGSKEAPGDAEAAAAKPDAQQQQQQQQQHQQKTQPQTQQRNQQENAGRPPSPQAQLQQHLHQHLHQHQQQHQQQQPANPETSPLPKVQLLRQQQPAAAAAPSEQQEPAGDRPRSPSPQQPQQQQQQQQQVVSRHGRVVSLAAFRKLQTLVCADSVSFEGFVSLIRAVEASRRILVGDERAAAAAAAIKSVFSRAATWLPDQTQRLFLNDFKAAVRSSPPFLALLGVDVAAAAADTTAGGRAAKAWNEANESNKAKADAPAKNTQDPSNQPFTSTPGLDAAERRQQQQQKQQQ…
TGGT1_277870	E. tenella strain Houghton	ETH_00032920	hypothetical protein, conserved	+	MGQEQSAVLQSPGLTAAEARLRPTAKKETRRAARTLKRSAPDRFMGLADVKDHIKPIREKEEKKKEEETFEGLFDLAKQLKEEKKKKEELEVSVLDLPETLEEPLSSEEEEEEDRGVFHKDVSLLKQTNDIFHPTCHPVAIEGEVAVGSILTFRDDSPYSREFCVYKIEWVESLSVGESEVFSILPLAFGAPDVSLEVPPESLGKYICVKAYRRVEDQLRDTELAIPEDGVYDQHIGNYRRRTGVAAAAAAAAAAAAAAAGAAAAGKPAAAASAAAEVVSSCIGGPVLLAADVGLTILKALARGGFSCAVKLRDVLDDTGRAVPLERDPVRAAKAKVKIPATFTIDDSVLELRYPKDLISIDENGRIKINKIKDPAASEKATIEQSLDRVAVRASKGPE…
TGGT1_313380	E. tenella strain Houghton	ETH_00034670	hypothetical protein, conserved	+	MGQSLTTQEKHNIKREIYTLYPGLEQQLEMAFSCHDIEGTLTLPYATLEPVIRHLLMQYGLIEYVTRFSKESGALDPSHVRHELAEFGVATTRLFGDANLNVDDFKSLAVVWLKKILDTHADDQAEWMEKLRADQEEQSANYAKAMKEFQEQYVKQQAVYQQGLEEQQKQIQDWNRLLEDAHKTQQQIYDEEVRRMKEIQEREARASEIARQEELELIRKYQQKLEEIARSEGGKCFVYPASKTPYGACASAGAQEPCRRKRSQARREQRPAKGCC
TGGT1_261500	E. tenella strain Houghton	ETH_00010605	hypothetical protein, conserved	+	MGSALSTGKHPLIDSSLVFPAPPSSYSCSSDGLLLLRSRFAITSGSPAAVPAFLVVPSPQSHLKLAAALRTARLAAAAAEAAVAAAAAAGGLPPQQQQRRRSNIEGICASPAAVARTELSDGETERQQQLFQQLEQRRKELQQHMLVLQQLQREQRQQRVLRRRQTRRALTSQAEEPASTTAEAEGGEAEAAASVVAAAALTISSAADTPASQRESFLLSTSSEAGEASAAAASDAVLTAGKSGSYWDTEATGGGVGSDYCILYFHGNACDANMVRGWLQVVADELGIPILVFEYPGYGLLSGIASSSSGIDRCAKVALEFLVEQLQFPPEKIILCGRSIGTGPAAFLASRLAKCNLQLGGLVLISPFASMAALAADMADLPESLARLVVTHHWDTEAA…
TGGT1_232280	E. tenella strain Houghton	ETH_00028340	hypothetical protein, conserved	+	MGSRGVLRGSLLSLDTGLVQIRFAAAKLLNLTSAEMGAVCGKQRAASEPKARRATVEVSGSSPAAGAPQQPPAAAPAAGTDAGGAAAAAPAEPAAAAAAAADKAKEFITGEGDGVYLMLLNENNSQALVQQYAHEKPTVQEGELLLLQIKPPIYVEIKESRFTLQNGKRTLKVGIQMAMKNADGQKKVCEAVLECLRLTCSYSAYIHAFPDLIRAPFSILLLVLERHEPASIKEGPDGGKIVSISAEEASQTNAGTEPTAEEAQKGEGQAAEAAAAAGKPEGSGDAAPAAAPAAAAAAANDSNNQSIFPEGPQEVPEPAAAPKATEQVQVLRHLAEGRSANFSSMRQIIILPLENSKAKEVLKEGSVVEEEQIEQLQKQVEKLHGVMIKATPEKPV
TGGT1_297150	E. tenella strain Houghton	ETH_00012040	MORN repeat-containing protein, putative	+	MGTAISCQCLDASKSENGFEIVATQQTEGNEGDNTAKTTVLSGGATYTGEFKNGLKHGFGVLVRPCGSKYVGYFKDGVAEGQGKFIHPSGDTYEGQWKNSKAHGKGRFTHADGSYYEGSWVEDVQEGWGVEVWADGSSYEGEYKKGKKEGKGKFKWKDKSVYEGGFAENAIHGEGTYTWSDGKQYTGAIR
TGGT1_243800	E. tenella strain Houghton	ETH_00011645	long-chain fatty acid CoA ligase, putative	+	MGVGRSPEGPCLGTRQLLPDGRKGDYVWKTYREVERLAIEVGSGLLNEDLVPQRVFTDVSGSQLTLRCIGIFAKNREEWVITEHASNAYGITVIPLYDTLGPQSTRFILGETQMKTVVSDGDCLVKLLDALQQQHAADSTSATSQQRDIAMECIVTVDDIPEDQKERAATLNLRLLSWNDLLELGRRSVVPLSNEVQPTLESLHTICYTSGTTGSPKGVMMSHGNFVACVATAIEGPLHENGLHLYSSDCLLSYLPLAHVYERFCENVFFSYGARVGFYSGDTHKLLDDVQVLKPTVFCSVPRLFQRIEARVTSSLQGKSFVARSLFNQALAAKIRRLRSSGIPQHPFWDKVVFDKFKNLMGGRVRIMLTGSAPLDPHTLERMRAFFCCWIVEGYGMTE…
TGGT1_306660	E. tenella strain Houghton	ETH_00007155	RNA pseudouridine synthase domain containing protein, putative	-	MISHARLTRQQGFVDDEGTLLVRGKAEPPFPALWSRGPLYKPHRGWEYIPERAARALEEVSSSCTVAAAAAAAAAAADGSDTHRHAALHDAHPPQQQGSNAAAAAAPANAQTAPTPAAATAPGTHFKAPTASLLSYVEPIVPALQPALGADCVALFVHCLFHLSEFRRQIFSWGSEKICYPSVEALAADPSLAAAIPPFTDGTLIGALQHTFAYMQLWPLAVACRRFQQLTAGGCSAAAAAAAAAAAAAAGVSSEVCPSEVWRWYGAELFPKSAAATRREGPVALSRKNRFCYFCQRCFCCCRCTHAAAAAAAAGGPPLLLRSAAVNSPASQGAPGVGAAVPSCSTCNGCSTCTSCTGCSGCSGCSSCSNCSSCSSTAAADLRRPLCVHQGEGFGAASA…
TGGT1_262390	E. tenella strain Houghton	ETH_00040995	hypothetical protein, conserved	-	MISLKRWELAFCLKLHGISFQTFFRRVSHSGGCVIAVEDSEGVVFGAFTDEFHKSHKYYGSADTFVFTFKGPDGKQPAENP
TGGT1_305860	E. tenella strain Houghton	ETH_00001830	CAM kinase, CDPK family, putative	-	MKELPSDLEQLMNDVDSDGSGVIDYTEFVAATLDKRQYIQEDVCWAAFRVFDLDGNGRISAQDLAHVLLNTDVQSVFPSPASLGNGNASSHAQSAAAHDAQEDANKGPGNSQSPQQKQQQMQQIKSIIREVDRNGDGEVRYGGSWVEAAGRS
TGGT1_305860	E. tenella strain Houghton	ETH_00011250	CAM kinase, CDPK family TgTOXPK2, putative	-	MKNRILNLTRHYAPTLPTVRGPSPDQQQHAAAAAAAEAPGPSAAAAAAAAAAAPPQSPNGVDPSRGAGAYRDPAAAAPATSAAATAAAAAAAAAAAAAAGGGGGPPASNMQKDKRLDTAEGRPLESPCRPNCAADHHCHGPEEKPHFFSLCTKCATDGKDKPLREPAKGFITRSESYVNASAASRWEVDELCGKEPHKEPSGPVFDRSRFVQEVQLDGTVSINDIFDFSHGQNLGKGSYGQVMKARDFKTGTTRAIKVVYKPRIENVTRLKREILIMKRLDHPNIIKLFEVYEDEKNLYLVMELCTGGELFERIIKSGHFSERYAACLMRQVFSAAAYCHANNVMHRDLKPENLLYADSSPLSALKVIDWGFAARCGRSHKFSSVVGTPYYVAPEVLFG…
TGGT1_232815	E. tenella strain Houghton	ETH_00007135	erv1 / Alr family domain-containing protein, putative	-	MKPLRLWEAKEATGPSRRRAPSWFVGTENLLQAALQGLAKSIGPPCPSLFRSVVCRLRSSLASPIMPSAPAALQGTPTPAEKPRAAEVHPDSTSADSYGGKASADSSAATGTPFKLHFCEETNEPEDVCNAQWLVLWSYAAYAPERPSPEEQQLLRTFFEFFPDQCIEGPAANCYAEAVRSSAPRVQTRRELLLWLCMVENQCRQKAGMPLKQCRYNDLMRRWRYADGYV
TGGT1_247690	E. tenella strain Houghton	ETH_00041590	ATPase 2, putative	-	MLIHVGFQDDSSSSPAAAATSSSSSNSSSSSSNGGSTRGGPSGLKGKIILLTKGADTVILPLLKQVGPVEERMVSAMESYAREGLRTLCIAYKEIKEKKFIRWLRVYEEAQTATVDRQEKIEKAAEMLENDLELQGITGLEDKLQEGVGETIEKLRHAGIKVWMLTGDKVETALNIAVATSLLPQGMRRLSYLMEDFRSSSSSSSSSSKELLLQQLQQDLRSIAAEKRRSRPTFAAASAATGPAAAASGTPAAAAAAAAAATEAEAAAAAGGKEEERALVIDGEALVHLLEDDVAIQFAAVCTACKTVICSRVTPYQKGAVVALLKKLTGEVTLAIGDGANDCSMIQAADVGVGLRGEEGMQAFNASDYGLSQFRYLQPLLLAHGRWNYRRVCRLVLYM…
TGGT1_245710	E. tenella strain Houghton	ETH_00016970	hypothetical protein, conserved	-	MMNGSDGLATAPTAAAAAAAAAARDSASWFLRAARSSASAAAGLHSPCSMQPCTDIKAKVGDTQLAASAAAADASKMITTSRPSTSLESSNDKGGLLQELSIALFSKLAESLPKDRGPLSFMSWEDGSWYCGQMADGALDGVGVYRYTDNSVYCGQWSRDRLHGFGVFITPSGFVYKGSFEADKQNGPGWHLFVSLFAFCLCFEYVLRCRLLTNMTILLRDLRRVLDFKKMRRHLEQHIGGLLGSHAFLLYSGIFLVPQGPTFFGHFREGRLHGFSCCVSPSGASRPLLGEWRDGEFLRALPLHSRIADFYIRAAEALDLLEAPWGPLPFPVPDATLLGLPKEEVPGILGSTGAPSHARREPKLCSAAMLEALRIELPRSLLQVAAAEGARHAAQQQQQ…
TGGT1_235490	E. tenella strain Houghton	ETH_00038945	GI18945, related	-	MNALARLLFLNGFCVNAPRCFLEKDEQIPSNVIDRRFLWCSGFGAAAASPCPSLPFMFANRSKVLNCLLLCFAGSLSKTIDEYLRQEPPWLAVFTAGHSPYTANLFCSLLSSIFTYDPVGYGLPLSRLFAAPEPEAFVCAALQLLLLLLDFKPLVFSEVAAGAGNTPALVNSLLTSLCNISPFIKGFGFESCIRLLGLLERLAKPSWLFKAPFHCQDLLFLIDAFNNLLQYQYEKSFCLWSN
TGGT1_305860	E. tenella strain Houghton	ETH_00024540	Os07g0515100 protein, related	-	MNAYVLQEYAVKVISKRQVKQKTDKELLLKEVELLKKLDHPNIMKLYEFFEDKGYFYLVTEVYTGGELFDEIISRKRFSEVDAARIIRQVLSGITYMHKNKIVHRDLKPENLLLENKRKDANIRIIDFGLSTHFESTKKMKDKIGTAYYIAPEVLHGTYDEKCDVWSTGVILYILLSGCPPFNGANEFDILKKVEKGKFTFDLPQWKKVSEPAKDLIRKMLAYVPTMRISARDALEHEWLKTTDAATDSIDVPSLESTILNIRQFQGTQKLAAAALLYMGSKLTTNEETVELNKIFQRMDKNGDGQLDKQELMEGYVELMKLKGEDVSALDQSAIEFEVEQVLDAVDFDKNGFIEYSEFVTVAMDRKTLLSRQRLERAFGMFDADGSGKISSSELATIF…
TGGT1_243800	E. tenella strain Houghton	ETH_00027200	hypothetical protein	-	MPFNGAMLTNENVLASLDTLTDWRARVLSILEGDRVLCVDSLASIHQRVIHLAIIRAGATVAFAHHGLLTLREDVESLRPTMIAASGGILPLLHSAARRTLKQMGRLRRFMLLLKLRWRARSYWRTGDLELQRLSPFEDLKEKLASVHTIIAAPALVSSEIIKELQLMYSISIVHACCSPETGIAFSSRQQNSSPSDPQDFQRMRAAPLGWASPVVTVALEELNAADDAESIEFHADEVPGRRAVTSPLVLNASLNDGDNVKAVESATPLELTRPSVRGSSKGHAVTEGEVVVLGPCVSVGYYRHQTAFQRQMTSRGMYKTGLVAVYAGPDLPLRIVSALSRNVLTAEGEFIDLEEAERQIRKVPIVRRALLYADDFHSPLVAIIQPRRSAVLRWAKTR…
TGGT1_242070	E. tenella strain Houghton	ETH_00014200	hypothetical protein	-	MQEQSCPGRDGGSNTAAEVADEEAAGTIQPLISSSRCSQNPPKSCSGSPPSAESVLNLYSNAAAEGATHNSDRHQLHCTTEDLSTLSEREGVGGTSSGETVCVSAELVAAVASPRSHEPSDSPLPEDADRLHASAPLGSISSSVFGSVEPLGLTAIVSAVGSWVSAAFDKHQEENATIEGVSTGASELSESTEASPESRARPVVGEDVATAKNTATQVSVLSLSPKPSVDEPIECLSTSQTSLEESPLPEDEGLHREPTVLLHLCGQTEPIRWSPNDCCPSQGDESECLYHNGDFNSHQIDPHLLRVPDPDELVEDPLELPVRQMSFHEIADNIEMWLLSSGQRILNAREDDSVSSSDSIEETPGAPLLDVMETSSINTDKAHVNDPASYDEFVGVHGD…
TGGT1_243800	E. tenella strain Houghton	ETH_00022465	long chain acyl-CoA synthetase, putative	-	MQKQKCLGSLRVGACSSSNNAAGCSSSSSSCSQQQQQQLLQPTLRRWGPSGQGRFSALLLQQLKQQQLISSCCAALLRCGTMGDLCEECAVLLTDSTDEKEKEKIKNLLKISKWKGVYALPLRGTETPDSSAVYRAVSDPANPTETCLGVAAIPQFPNIKSPYLLLKEAARIYGPELYVGERKQIKNAEGTVVELTDFKYFTFADTLRIVEALGRALDQEVGVPFSHFESEGATESPKPLRVIGVWSRTRMDWRLLDFAANYRGIVTVPLYDTLGEESVDHILKQTKIQVLAIEGSKLEAVLRLKKEGFPFKAVVSFDEPTEAQMEAYKEAGVALYHQEKLRRKYLTIPDEKTPEELAPSLDDISTIIYTSGTTGLPKGAVHTNGSLVSFVGSYLGSGN…
TGGT1_305860	E. tenella strain Houghton	ETH_00025085	calcium-dependent protein kinase 3	-	MQRAVKTISKAQVRSIERFRREIDIMKSLDHPNVVKLFETFEDHRNIYLVMELCEGGELFDRIIAEGHFTEKRAALLMRQVFSAVNYLHSNHIMHRDLKPENFLFLSTARDSPLKIIDFGLSCRFKPGEFVSTKAGTPYYVAPQVLEGRYDYRCDAWSLGVILYILLCGFPPFYGDTDAEVLAQVKAGAYSFAGPEWRRVSDEGKDLIRRLLKINPDERLSVEDALHHPWMMSLAQSSQNVPLPVTLMANLKGFRAQNRLKKAALTVIAQHMTDSDIDHLRKIFISLDVDNSGTLSVQEVAEGLKRLGWTEIPADLQAIMEDVDSDKSGHIDYTEFIAATMDRKLYMKEDVCWAAFRVFDLDGNGKISQDELRQVLGMPKVQGAVGSETIAALLKEVDL…
TGGT1_237820;TGGT1_260820	E. tenella strain Houghton	ETH_00023475	hypothetical protein, conserved	-	MRCGSKGSANAQEKSRWVPFNTVKNILTTPQQLARVETQGDFAQEPLAVGLHISKTESCIPLLLENEADKCNFVEMLKSFGIHPHKSKKSEASEDRQNQPVESHAS
TGGT1_242070	E. tenella strain Houghton	ETH_00025200	hypothetical protein, conserved	-	MREKTIPAGLTLLRQGADGDCLFVVESGSLDCFRAPGSGSGSGSGSGSGSGSEAGGHGQRVKVVGPGDVIGELALLYNAPRAATVVSREVCKLWRLDRDSFNFIVTLLQSMSTYDRLKLADALRTETYADGEFIVRQGEEGNTFYLVEDGKAKVFQTPEAGGARVHIGSYESGDYFGELALLTGEARAADVVSDGFCRVAALERKSFKRLLGSVEEILRKRALDYKRK
TGGT1_305860	E. tenella strain Houghton	ETH_00033170	Calmodulin-like domain protein kinase isoform 2	-	MRERLGTAYYIAPEVLRKKYDEKCDVWSCGVILYILLCGYPPFGGQTDQEILKRVERGKFSFEMPDWGHVSEEAKDLVRKMLTYDSSKRISAEESLSHPWIIKFSSQKDSDMPKHALTGALGNMKKFQSTQKLAQAAMLFMGSKLTTVEETKELTTIFRALDKNGDGQLDRKELIEGYRKLLDWKGESGEVDEATIEAEVDQILTAVDFDKNGYIEYSEFVTVCMDKQLLLSRERLLQAFQQFDSDGSGKITNEELAKLFGITAIDDKAWHEVLAECDKNNDGEVRNNFHF
TGGT1_313290	E. tenella strain Houghton	ETH_00000195	hypothetical protein, conserved	-	MSKTERASRPGRTALSTKGPSRMEIRRERAKLDSPTALLTKATSRRICLTYEGSWREGLMEGLGFYSWPSGQCSSYEGLFKKGLKEGKGTLLLRDGRKYEGHFSSNKLHGEVTEVMPSGKSRKGIWKEGVFQQWTEAGEKVLLNVAEKDTDKDEEYGTSIFSNPDAYTQVYKTQDRKRMKIKGGVLRGKIKEDASAQNSRTPSEYLQDEQQQKQEQQQQQQQQQQQQQGEQQ
TGGT1_292120	E. tenella strain Houghton	ETH_00023130	phosphatidylinositol-4-phosphate 5-kinase, putative	-	MSRFGKCCGGRAAESERLPSRVPADMADEIQRSTLLTRKEIQGLYDRFRKYAPDGRLLFSRFCDTLGVLGMLDDTMIAERMFRAFDQNKDRELSFTEFATALGVMMRGTDDQKLNLSFRILNPTYTGTGECLEDYRCHSVSTSDSEESIRASPPRQALSGPAASGGGPPYSQDERRCSVDSRRQLREAGNQLRSLAKPKGKDFLSGEKGREASALRGLTSTQSVRLPRAMRWFEIYRSVIYADSLGLDEFVDLVRCLQASRRALLGGDGILASDEEIAMTFLPLASEMPDGSRRMMLRDFKKAVHTSPRFLCLLGVACNNVSTPSCESEASVTTKSEKKNSVFSGDGTAAPCVGGNPPAPSEASSALRIELVRRVRQAEAQAERHQWKLQQQQREQLQQ…
TGGT1_269990	E. tenella strain Houghton	ETH_00015670	hypothetical protein, conserved	-	MSSIREPRGSKTKLKTNSSSSSSSSSSSCSSRPCSSSIDGGAAAAALPAAAAALLFGECWLPFFKLYDSDFVQKGPLDHFSSFFREKLWREGRKVGFLEGVICFQNAPLLRQACAGVLTEKGLCRIFPPVLGHEHRPVSFTFAAAAAVPAPVARLARIHELLLHLIATKTQQQQQQQQQPGAVAALFAVGKRHHPDPQNDAAKSLEAARAACEELLQLLSSSETEGRRTFLYSSEAELLRSQRVLLHLGNHLLEFVDFVYWQCRGSYCAALCAILKRGELDLGTLLPPRPEGCAALSLSERLLLELKARAAAKYPDSLVSCTGAVLANEKLLSVLVKVLLLRTHAHSSQQVHSALSCLDLWLQLLAARGLPLPPNFDFAFFRSALELVLSSDLYPVVTK…
TGGT1_209450	E. tenella strain Houghton	ETH_00024400	TLD protein, related	-	MVAVVKTEEGQVLGAIISSELKEGGHNFFGDANTCLFSLEPQLNVLRTSGLGRNFVYLNTKNKFHPIGLGFGGQVGAFRFWIGDEMKDCYITKSDCTYSPGRMLQTMNEPIPQGPDPLDSLSGLTTTVEGATATSSSSKPRADASVSPPSVESSLTANFLVPLNVKELEIWGTGDASTLEQQQQLLKQQEQLRQERRQVDKGRLLDSNFDREFLLGGTFSRAKGPEAPAV
TGGT1_290200	E. tenella strain Houghton	ETH_00032295	opine dehydrogenase, putative	-	MVIAATSQGSGSQGAGFSGVTTADAAAAAAAAGNSCTQGSCSGNSTWSSQGLQLACSMCVCVVGGGNIAAAAAAWLSRSSKSLCVHVLTRQPQRWSQRLRVRANPACRWAALQPYECNINLITSDAAAAVKGASLVMVAAPAHVHLELLRKVAPHLKPGCILGTLFGQGGFDWAVEAALGPAQGQLAAVFGLQHVPWLARWEEYGRAVELIGPKEFICAAVSPPCARPMVQLLLQLCFDQPCKLLPNFLCLTLTPSNQIIHPARYYSIFKDWDGEKVYKENEISWGLYTEFDAEAAKHLALLDGELQAIKKALVSRFPNLDLSTVLPIQERILQQYGDDVRDRTNLQTIVATNGGYASCRTPAAAVEGGFQPNLQSRLFQEDVPSGLCVLRGIAELAGV…
TGGT1_262860	E. tenella strain Houghton	ETH_00014555	ADP-ribosylation factor domain-containing protein, putative	-	MVRATLSSSLFHQVQLADFTLPLVLEEPRCYSLSLFCYSCSAHSPAHRRALSADPSRTLIFRTMGAWLASLKQTLGLLPADRKIRVLMLGLDNAGKTSILYRLHLGDVVTTVPTVGVNLETLQYKNISFEVWDLGGQTGVRPYWRCYFSDTDAVIYVVDSTDRDRMGVAKHELYALLDEDELRKSLLLIFANKQDLPDAASEAEIAEQLGVSSIMNRTWTIVKSSSKTGDGLVEGMDWLVERLREQGLGA
TGGT1_245710	E. tenella strain Houghton	ETH_00036900	hypothetical protein, conserved	-	NEETKAAEAQFVGGGRIRKQVAFDNGAVYTGEWLGDARDGYGVQVWDDGARYEGQWVNDKAQGKGKFVHVDGDVYFGDWVEDRAHGHGVYHHADGSR
TGGT1_271380	E. tenella strain Houghton	ETH_00042185	hypothetical protein, conserved	-	TFSVDAKHFPYAEAAAIVLQAYNEGKAILVFDSCGEIFAPGVAASFLVARGFGVIQAISHVRRKADYSKLDNTVVTELYRLAGGLRQPLDKGPIIGDEQGPLLISYPENPVDEPPNTEVLAAEALKAFLKTAKPQEAEEGLGVVYKLLNNAARNPHDE
TGGT1_232340;TGGT1_267100	E. tenella strain Houghton	ETH_00039430	protein phosphatase 2C, putative	-	VTPVCKEDEFLIIACDGIWDCKTNQEAVDFVRAHLAASRKEKAEALRDACEALCDACLSEDPIKSEGHGCDNMTVVLVGLSAELKGKVSRAAKAKICLYGGAPDLYLGQDEADYEALDDDD

## Sheet: Hammondia
Input Ortholog(s)	Organism	Gene ID	Protein name (Hammondia)	MG	Predicted Protein Sequence
TGGT1_242070	H. hammondi strain H.H.34	HHA_311300	cyclic nucleotide-binding domain-containing protein	-	MAGATAVYQEYINTKLNPILEGLVVEVLLEHPDDPVTFMISRLCQRAGIPDPVAGAAGGKNEAEELKVEIGLLREQLKKLQKNGVDGSPAETQESDDSDEEHDDDVFDDDEAVMSRFKNLNKMRCSVSAEVYGEWNKKKNFVAPVYEKDEGQKEQLERILRQLFLFNSLDEKDLNTVVLAVQEKKIEANTCLIREGDDGECLYIVQSGELNCSKLIDGEEKVVKVVGPGDAFGELALLYNAPRAATVTSVSACDLWELGRDTFNAIVKDAATKRRSMYDSFLKSVHILDGMDAYERGKVADALRTEMFTDGAYIVRQGELGDIFYIVEEGSAVATKSFGPGQPPIEVKKYQAGDYFGELALINEEPRAANVIAQGTCKVACLERKSFKRLMGSVQDLLS…
TGGT1_311360	H. hammondi strain H.H.34	HHA_311360	protein kinase G AGC kinase family member PKG	+	MGACISKNSSARVSRSSALSASKQTVAASAPPGAAGDETSATGAAEEASRNSLARVDGTRASAAESERAPDGACAERQELGTANAEQEDVTEKDKDTSETLAGMNSPKTLEAEAQEDDLKREAPIQDVPSEAPEGPKEKPGGDRKPAQKAILKQDDSHTEEEKLNAHLAYREKTRADFALIQDSLKANLVCSSLNEGEIDALAVAMQFFTFKKGDVVTKQGEPGSYFFIIHSGTFDVLVNDKRVNAMDKGKAFGEIALIHNTERSATVVASSTEGALWGVQRHTFRETLKQLSSRNFAENRQFLASVKFFEMLTEAQKNVITNALVVENFKPGQPIVKEGDAGDVLYILKSGKAKVSIGGREIRMLRKGDYFGERALLYKEPRSATITAEEFTVCVSIG…
TGGT1_292120	H. hammondi strain H.H.34	HHA_292120	membrane occupation and recognition nexus protein MORN2	+	MGACKSKPKTKRPAEADGGNAGVTAAPTAAPVEGEAEMQKPEGAVTPAREDTPSQANEKTEAHPELAAAPEEQQRSATGSAEAGGAEASGEAGTAEAGTAEAKTGDASEGDQDANAAAGSYHMSAEPEVDVRTVEGEGAEGDLVSRPVVTLANGVTYTGQWLGTKKHGQGVQQWPDGAKYVGQWKDGFADGQGVFTHADGDFYEGQWRMDKANGYGEYRHSDGSEYRGGWRDDKKHGEAVEKWADGSHFEGQYANGKKEGEGSFTWPEGSHYRGQFRENEIHGQGRYIWADGRCYEGQWAHNRMNGEGVFTWSDGRKYVGGYVNDKKEGQGTFLWTDGRSFRGGWLNGKQHGVGEFTARSGEKKRGIWDQGVRQRWLEDNEDVDEHGQVVKVNVESRSA…
TGGT1_281580	H. hammondi strain H.H.34	HHA_281580	PP2C, putative	+	MGACKSKTTKPTRDEAEALHVGKGVDPQELSASPHKGDAPVDRETPPAGEAKLPLKAAKARQRDSCCSTSYSSSSSSGAPTADGEPGERGKAGPVEAPGSSPGVETIGDLRRRRLTVLGTPDEKTEEADSAAGPQHASLADRFKRPVEGVARLAASRSTFGQRVDTSPEAVGARPPGQPLNGAALAERREELVSLSTLVRQGSFSRSLHSSPPASVDGRLSLREEEERGERVDRGEGEKKKGERKGRGSEAENEAELIQQIRREKSLPVAVEEDDPIAAKALSFSREQLPSVVTPSEADDASILSGLGATTRSDAEASARKLLVPCARAPLPVSRDTLWKHPEVLTASLFLELFTPPQATPACCFLGAAAHCRQESFDDKVEDCAVRPPGSNVESVMRS…
TGGT1_262390	H. hammondi strain H.H.34	HHA_262390	TLD protein	+	MGAEHSGMSAPGEGHRASGSSLSSLGEGEREFNSPRERHDEEHVGPDARIRREFEEESGSVSHAPPPSPSGRLGSYLPSAISRSATWASSLLWRRNSSSAGAVQGREAATIPSYAGPGQISHPPSPASSPNEVFASPLRLFSSRPGERASASPSSPGDGSLHARSATVTLPPHFLFQPGSIREAILQPGAAPDSLREKRLSFSSCSVDPTYQPSPSCTHSVSLSFASSLGGSAEPSHAPPAQSPSRRASGLFPNSTSLRGARGTSTSTPALQAPHIHFGVHMPQQVSATPEDACGNTTREPDEGDEKRGEGQEPLARTDRAGDSVSPLRLHREANEAGERGRDREAEAPPSSLPSTFSSSSVASSSVLRADRVHAPSTSLAPASSLASRQTVTSGSGDD…
TGGT1_319510	H. hammondi strain H.H.34	HHA_319510	hypothetical protein	+	MGAGASTHAGSGEKPRAEGLGGERQNLPVSRDLFGSAVVDVPSSSGVKHVVILGSDFVNNFAVFPSRSTGADLRTQASLSSPPGPRDPSFSDEFPALTVSNEGTLAAGQAAQGESPFVVDARGDSPPVGEGHAAREAWVAARVLEQKKEFFTDMRSHLKSALVEQMDVLKQGLRACPLTAAAASVASATAGASLRQVEKAFPEDRTVSPFYDQQGDSACPRPVCHDEQLAVLRCYNRQSKQGESEGNADYLSCRSVVADLRACSERVTQLGPHARPQN
TGGT1_261980	H. hammondi strain H.H.34	HHA_261980	gorasp2-prov protein	+	MGAGPSLDRRGTLAVGEKARGGAYRVVKVQRGSPAEEAGLEVFFDFVTRIDDLPLTSPNEETLQAFFAKVNRSTRPEPVELVVFNARMRGFRNVTLRPAVLSHAQRPAASCVFSLGLSVSFSDVGNVMSEGVRVLSVAPNSPAAHAGLVEREDWILADSQGVFRDVDDLVDSVAAALNRHLQIFVFNASTERIREVLIVPNSAWGGEGSLGCELGSGYLHRLPFSRRARVTESGAKGEERFSPQSPSAANADRSEPVLSRASEAILSTAAAPARRSRESESVGQSVSPEKAGPEGRGNAAQSEAREEAFRIGKEEGKQATGDREEKEIYILDSDGAPVLLTPSIEFESSYPPYAHALEEEDVWSVGAAEESDFPACQDELDRTNFAFQTRNYCLYPVTN…
TGGT1_290200	H. hammondi strain H.H.34	HHA_290200	NAD/NADP octopine/nopaline dehydrogenase, alpha-helical domain-containing protein	+	MGAPSPVAAGVAARTKSPLLTVCVCGGGNSAHAVAAWLGQAHKNVRVNVLTRQPEKWQKEIRLETKICRWDHLGSITGKINAVSSDPAEVVPEADLCLICAPANAHFPLLEKIRHHLKAGGILGTAFGQGGFDWAMLKAFEAEDCRKNLGCYFALQNLPWLCRIIQYGSAVELIGPKDYLNATVVPGNMGQPVRLLISLLFDMPCRLLPNFMAITLSPSNQIIHPARYYSIFHKWDGKTPMKEDEIQWGLYNQFDEMSAEWLEKLSTELQAIKKALTARFPELDLSSVLPIKERVIKHYGADVKDTSTLQTVFATNRGYAGCRTPATKVEGGYIPAVNGRLFNEDIPFGLCVLKDIAEQMDVPTPSIDFMIEWHQKLMGKEFLKDGKLNPEMIHETSAP…
TGGT1_220320	H. hammondi strain H.H.34	HHA_220320	BSD domain-containing protein	+	MGASESTDSLRADQEARELRELNGEHYQDAEYPWFFLVQWACEKVPADAVFTWNLSDIKAEVAELTADPSTFLACCPPDEAFRESGEFSFTESGVFVEWAMLLLELMPSLADVRYRLVPAKLAEEEFWCRFFSAVRHRIQQHVLAAQEQSHAVPSPSSSSSLGHRLTAPLPLAAEAAETVGCSSLNGFSAPVSAVSFEECGVQRRGSRSSHGETDAGLSHAGDLQSNQVGAPTSAGGAAAKAEGGPHAATNPTKCRDSHSDGGALLAGGDREWNSAEDPRHPTLIGAPSHDAASGVRTPHYVMQNGAGARPTHP
TGGT1_267280	H. hammondi strain H.H.34	HHA_267280	hypothetical protein	+	MGATTSVPSSSSPFSDSFSPSSFSSSLPPPHRFASVVTSASHLPAATRPPVVSVFFSFRLACPAPSFFQDAGLSLSPLLPRILSLFTVPESSALAPCGASTLSTRLFQRLRSGHGGGGILVASFARIEVLSSAFGSSLYELVFPREWGGCTCGTFNEDAALKNSRGVVFLAFRDRKIRCFSPENLEFLGELALPGEASEAPSGADASKVRRSTDAEVRQKDLQKRNSSGPPGDADPLPNATTDLLSHSTQPILSSSSSSSSSSPASPASVSACPTVLTCPMNNSVISGDAAGGVCAFFLGTRQVAATYEVPACLLARQKALLESRQERESHRDSLRSSSQIHRGKETRHTERRNISSSASSFSSSSSSSSSSFSPGLFSVSTLHFFEKKRFLFVAYGRP…
TGGT1_232280	H. hammondi strain H.H.34	HHA_232280	hypothetical protein	+	MGAVCGKSKNQAATKDSHAANADSQTPMQKLQTARAAVAAAAANGAETGKASHLKLAGQMSVAARSAATMEEFKPGDGDGVYLLESPEGHVSLVSQYAHKKPTEQGTVLLQVKAPPYKPIPESRFKLQSGKRILRQNIEAMKDTPEAKAKYCEAVMDFVRLANTYNGFLWASSHLGQIKQPFTILYLEPEQRAFAEPEQPAVEVKDTVAIGKDALEKHEEKAAETDADKEGEQSAPKNESPESGQDATAQRKVLVQYLGPESSVPHRLLATCGILPLPLDKAKELIEEGKVVDNVEEIKTIVTEAGGFFGIPAA
TGGT1_237820;TGGT1_260820	H. hammondi strain H.H.34	HHA_260820	IMC sub-compartment protein ISP1	+	MGAVSSCCAVEESEDRQVMQQENAAKTKGEKSRYERKKGDKSGKRSPSHRASHAASAPQVTAADIEDLHRRLLAGMAVLVLLQDGTRLQCILHYNEADSSLSISCEDKVRIIPLSDIKALLYTRDQLQRVETKANLVDDESCVAIHLLESGNCIPLRFDGVKDKTCFVDLMKKLKA
TGGT1_232340;TGGT1_267100	H. hammondi strain H.H.34	HHA_232340	protein phosphatase 2C domain-containing protein	+	MGAYLAKPKTQKVSEEGGEEGLTITCFGAASMQGWRQTMEDAHIATPSLRTASPAAAKTLEELAQSGSRESKEALPAFAQDMSLYAVFDGHASNAVSCWVSDHYTKVFLDRLEQIEADAKKGVSPAGLAESLSRQLPDESIFSLRNAVLCEALQQSFLDVDEQMKREDNRQELKKYFEQGQLEQRDNETYIQRYLNDGGDVRLVEMDGQKYLQFVPRTSEDEEEDGEGASPEKAETDGQGEKEKEAAKEDATGAVNGEEKRAAEAETVNKLTRLNSTKVEEEDSEKKPESEEEKDTEKEKEEETDKEEEDKAGDRPLFAHPSTPEGSGATAVVVLVVGGEDPVIITANAGDSRGVICRGGKAFPLSHDHKPTNPDEKKRIVAAGGYVTNGRVDGNLNLS…
TGGT1_232340;TGGT1_267100	H. hammondi strain H.H.34	HHA_267100	protein phosphatase 2C domain-containing protein	+	MGAYLSAADSSKETTSGVCTAMNLRWSTCSMQGWRVSMEDSHLVLYAKTCPRLAQTSLASDREATARDSSDPKRLEPSGPAAETPDRASSRASHPRSSSAEGSTGVAAVAPTGVSAAGPLGSSALAVGPDEKIYFQWGEATMVKRLARAQRRSSGTVGGIPVGTSVEVNAEEEKPVFRGEEEEKRKNGVCRGGAALRNFRRRRRSSAGEEEKGFVEEEDATPEDVETGDVKLALFAVFDGHGGAHVARFAAERLPQALLAQDGFRKGHYGAALRGAYLEVDEQLRDASCQEELHHLAHHPSAHRLRLEQSALFVGSNGSGTFSRRLSRLSGSGFVGRTLSFGGSPAEGDKRGGPEAPEEAPERVVSRPASWEPNEPVCGAAEKPEGLADSGLRASNEET…
TGGT1_207460B	H. hammondi strain H.H.34	HHA_207460	Rab5B protein	+	MGCTASSTASAGGESQLRMANAGGSLDDGFSERLNLEAKIVLLGDSGVGKSSLALRFCRGRFPQYHEVTIGAAFLQQTIRVGDDGSQLKLYIWDTGGQERFRAMAPLYYRDAAGAVVVYDVTNPASMDAVRFWVEELKQRGPANCCIAVAANKSDSMENSENAEPSPQEETAGVDVEAERRAEMKKYCAAEGMLFVECSAKTGFNVGLLFEQLAKDVFEQLKQSMMEL
TGGT1_226700	H. hammondi strain H.H.34	HHA_226700	nuclease, putative	+	MGCTESKAKEPRDSRREGSTAPEKHVPAPFCLPFSPQDFYTGAELLSTEADIGDAILDHQLCIVGRCVNVSDGDSIRVRHIPNGQTLYPLRAPRKRRETREPMREPSDEEDPSKSWKGKLTENTIRIRLYGIDAPETAKFGNPGQPFAQEAKHFVTQRLLHKVVYVKCLSKDQYGRLLARVLIPRPDGLGHALFRGVSDAKDGEMRETRDEKVDARDRFIICLMHIMFCRPVKGVRQSKKDSVQGAPSWWCDDVCEELLMEGLACLYRGRGADYCDQRPLLANLESKAKEKKLGLWSAEEGELQLPGEYKKSTRAGLLAPEADSDACSNGRGSRSRRRKSRSRSPSPAGRAADAECCTNAGENGREDTREAGPKEAEEPVGENRRKSRRGGRGGRNRSK…
TGGT1_242570	H. hammondi strain H.H.34	HHA_242570	hypothetical protein	+	MGCTQSAPGQACSCLPNSHLARKAACAAGPSLSLKKRAAAGGLFARKVSQLVTQEDGEPAATMLLKDEHADPDFPSLDGADGALVPERELADEENAEDAASRRRSLRQNIIMRLNSRKISLRTFRRSSGSGETIPSSRDAESPRQTKGECVAAGGEAPSGSDNNSACAEEASAFFKAFTSAPRASLTAQSEERKHSANDGPPADGEPTTEEMRAVWCVMKANSATKVEQKIEWLHRLEWLLVRLNPMESNHPTRHALLEAKVLELCLDCLRENQDDAGLCVSALAILVHMSLNDETSKKLVSSNGLEDITLLLKKYYERCHKPELATPHAPQEDREEESAAAEGSDPRDNGSFVGNNDANMASEKSVAAANDTEETKEEWKQTAGDPKDSEGAVTSTVA…
TGGT1_313290	H. hammondi strain H.H.34	HHA_313290	MORN repeat-containing protein	+	MGCTQSTANETTKKPAQSAPSGLSQQSQQPAEHAVSLKVAETGGHSPTENTERKCSPTASVPSGPDGGSGSATVEGDTPPDVCLLDSDAVGSTYVPPPGGRQGHSMAAGPPTNLAEIPGESAGSGRVARPPVTLASGAVYEGQWKDPHRDGEGKLSWPDGQTYEGSFKNDECHGEGTWSDSKGNVFEGQWQHNRINGTGKFTHSDGSVYEGQWKDDVKHGKGKETWGDGTVYEGDFVKGDKKGKGSITFPDGSHYVGSFDKDFFDGKGTYTWPNGRTYEGAWKDGYMHGQGVYKWPQGQFLKYEGPYEQSLKSGAGKLFLRDGRIYVANFAKGKMDGEVVEISPSGKKRKGIWKEGKHVKWTEQGKAPLFVGEEAADTATAADYETSAYSNPNKYHQLY…
TGGT1_305860	H. hammondi strain H.H.34	HHA_305860	calcium-dependent protein kinase CDPK3	+	MGCVHSKNPHSKHAGASGEKPDSSLEKGGQSKGSAPSSGTGDSGKGTGSPDTKRDSMPMTPGMYITQQKAHLSDRYQRVKKLGSGAYGEVLLCKDKLTGAERAIKIIKKSSVTTTSNSGALLDEVAVLKQLDHPNIMKLYEFFEDKRNYYLVMEVYRGGELFDEIILRQKFSEVDAAVIMKQVLSGTTYLHKHNIVHRDLKPENLLLESKSRDALIKIVDFGLSAHFEVGGKMKERLGTAYYIAPEVLRKKYDEKCDVWSCGVILYILLCGYPPFGGQTDQEILKRVEKGKFSFDPPDWTQVSDEAKQLVKLMLTYEPSKRISAEEALNHPWIVKFCSQKHTDVGKHALTGALGNMKKFQSSQKLAQAAMLFMGSKLTTLEETKELTQIFRQLDNNGDG…
TGGT1_209450	H. hammondi strain H.H.34	HHA_209450	TLD protein	+	MGDSSSKFSHTTPALSYQRLSQQEVQELLSSFGLNEFSPAKARISLHSFLRIFPPVLHPTASVLLPVLRDVVRMQQMQGRGYSSSGFLTGKIDSSTQLAASKTPAPGTRGGLKNLGNLTCSGKGARKGEETCSGGIHITLQEMVDAVSACAYGDREELQVHMLQRLLSRMSKVLEEQCKRLRHHQAGTGGSRHNADRGAIAHSHHLSAGLFLLHHGGPPGSAGSLTSDTPQTASTASLQAAAPGAVQSPGGSVGVSSVPCSGIEAVLHQVFVSAYLLFLAIISPSNPIFSSPDPFALAAAGPTPASPRSHHRAGPGSPAGGPTDSDADFLGSGSHSSSRQTAAGPGMSGWDSTSSSAAAVSLPLSTPLDFSFLLSAFVTSAGAAAGVGSKTPGPQMGNA…
TGGT1_233030	H. hammondi strain H.H.34	HHA_233030	gliding-associated protein GAP70	+	MGGACTKNRTKQPGRKKAQELKERQRREQESIAEDERKRMEEAAEQRRQSEKEDSRLREEEEAALASPQKAEAEEGKQADERRQEEDRRRTEEEDRRRAEEEDRRRVEEEDRRRAEEEDRRRAEEEDRRRAQEEGRRRAEEEERRRAEEEDRRRAQEAEERCREEEEQARQRREEDARAERKTIEEAERRREELEAERRRLEEEEEAAHRRKLLEEESDEYTSESPSDQEQYDQETESGTSSPATVSSRVSRSVTGSTSQRRSRKVHGANMKVVHKAARIVSHHCGCELEPLHDDLTCPVCEFTDMGDVPLLR
TGGT1_267440	H. hammondi strain H.H.34	HHA_267440	RING zinc finger protein	+	MGGGVSRDRQEPSSRLNYGPQQVVFIPASQNPNVGGRAGTSNVPLQQSTDPRFGPQSEVPVPNPEAVPRLSVQQTCVVKNPVNLHKHSLKCFHDPSYPDRLFVSFLLDSTTEVDISVHYYAQQLTDVATGAPTFVSRLSRPTSESSRRFPAAMNQHFCTTAEEALLLSELQQQQAILDREDEDEDGGVYPITVCLRSVPPAQSSGAYQPTMVKNQYTFARILRAPRGGPATGTDSAAADASASSSAGNFGTSSPGQDWRAQIVKQKIQFGTRTFEVQEIFGIERGNSTEMQRLPSGTRGANVGATSGGDESDSKNSGDCHIDSLAGRECVICLAEERNTAVLPCRHMCLCSGCANIMRMQSNKCPICRQPVTSLLQITMKTNPE
TGGT1_305860	H. hammondi strain H.H.34	HHA_206590	calcium-dependent protein kinase CDPK2A	+	MGGRISRQRGGAQSQAPDPRHPNSSSSSGVARLGQSASPADRKVSSRHPHVAGQPHVSSRLHAPTQSQRGTSPASSEAGDQRSSSSGRTSTGRSRGAGLFSSTSTQKSKPSRSAKSTSATTTLSPQPYTPTPEPHRGGAGASPITGRSPASGTGKRCVPSPGAGAAAARDEAHSRHVIRHPSDSRQVPEAPISRDKEGGIDRSKFIVENTGALTDFYEIDSATLGQGTYGSVSKARKKDTGQVRAVKTISKSQVKNLERFRQEIAIMKELDHPNVIKLFETFEDHRNIYLVMELCTGGELFDRIISEGRLTEKQAAVLMKQMFSAVHYLHSNNIMHRDLKPENFLFLDSARDSPLKIIDFGLSCRFKKGEFVSTKAGTPYYVAPQVLQGKYDFRCDAWS…
TGGT1_261780	H. hammondi strain H.H.34	HHA_261780	microneme protein MIC7	+	MGGSESKDACELGGTPFCGTVANSAGCIALTKEFYCTCKPGYQAEGRMTNSACVDIDECARGIALCFSKIQNSECVNTPGSFECRCNEYRTLKNNVCEDINECLDNRGGCAEHSDCINNDGAPVTCRCLPGYTGNDGKPGRACKDINECEEPDHCPENSVCINTPGSYRCECKTGFAKDAEGACTGKDFCVTGENRCDPNFATCTPVVGSYACACKDGFQGSGKKGECKPLPGSEYKACELLGLHCGRYQGCVSDNAGSYRCAALTKVQQVKVLLSEGPGTETPLWLWCCVALAAVIFVGAVVYGVRYFLKKWKKTYESEDDALMSGYGYDYGAAHSFSG
TGGT1_203160	H. hammondi strain H.H.34	HHA_203160	hypothetical protein	+	MGGTVSTEENKQWALEKVLFFDPETRSDPDEVLQGRGGAGCVKRFTPSSAKLCNRNFLIRFFIDGKGREFVLKLQNQPHCRLLLCDKAGEPIKEIRTTRIKYIQRQNVRVEVYVKTERNEMSSLSFEFENTKECDLFSEFFKMLFGIQVHHFGFRDMGSGMADLMKNDDGSSDSDWSGTEEDDYERRQKAQAQQRRQRKMALQRRTGCPLHGDKPCACAVERPTITQGDDESSSSEDEVQAAWSSRFPVSIEGVCESGSTVRMKDLTARLVNKAPARVVEWFFSNEPGKDPSFPTVPIKTGLSLRIEERYVGSSIQIRVARRVEGSNLANPFVYSVAVKGPVTVNSVTARRMLEYLAEAETPIEVTMANQSLHTLFDLPPDSVANTRPFFDSTLYLTRL…
TGGT1_262860	H. hammondi strain H.H.34	HHA_262860	ADP-ribosylation factor family protein 1, putative	+	MGGYFSALFSRLMGPKEVRILILGLDNAGKTTILYRLHLNEVVETIPTIGFNVETVRYKNIEFQVWDLGGQTSVRPYWRCYFPNTNAVIYVVDSADRERMSDSKHELHLILQEEELRGVALAVVANKQDLPDAMSEGEISAALGLPSLRDRPWAIMRTSAVKGEGLDRAMDWLTDVLSQS
TGGT1_247690	H. hammondi strain H.H.34	HHA_247690	phospholipid-translocating P-type ATPase, flippase subfamily protein	+	MGIGGSKTPPLEDWVVRVGGTQEMKTASNAVVTSKYTIWNFVVKNLWEQFHKVSNMYFVVICCLQMIPQISTTNGVPTLALPLSIVLVVNAAKDAFEDWQRHRSDRIENGQITHCIATAPDRAACSLRLRDAKDVAVDVRRTSRSSGLSAEDLAGSAECTVAAQLGLTSAQARDLGITPKQWKDVQVGDVILCLKNDCFPADMVLLATSDTRGGAFVETASLDGETNLKLKQTHRVTFEWLGSFLPLAVCYLLTRAGRIRCQVPNRDLNAYEGVLELDAGTCDLGETDDSELDPDAECANRARAATLRAWPQVDAALSVQQLLLRGCKLRNTEWILGLVVYTGQETKIQMNSSTPPRKSSRVERLTNRLTLSIWFVQTLLCLSASIGHTVLLFDPTAKA…
TGGT1_261500	H. hammondi strain H.H.34	HHA_261500	hydrolase	+	MGISSSNLGDAILFPAPASSYATQLPGLLWIEEDFKPKVPRGSLSAEAMAEQEAVHRQERAKQRLFPAFFIEAPGGESQCTILYWHGNSCDLGQIYEEMDVLSKFLNAHVLAIEFPGYGLAPPLNGPGPEDLAAAAIGAETSGEAALRRTTSGLARNQMGELINKWSRSAFNFLIWLGVAPASVICFGRSIGTGPASYLAAALAEENIHVGGVVLHAPYITVHKIVQEYASLGTWLISNHWSNAANLEKMGAASCPLLIVHGLDDEVIPTSHGRRLFEAYKSEKKEGFFPADSSHNSYYIIDDLGKPMETFLQDKSLAANAPAVRVSIPAYVREAPVWQLRTLETSGASPAAEAASATSAASAALTSLPSSPVSPERVAEAKEALEDSQSPATEAVVEV…
TGGT1_269990	H. hammondi strain H.H.34	HHA_269990	hypothetical protein	+	MGKQCSKELPVHARSSSGRGDAVWASPNSDVCEAERHSGSSGQRTVSIAASTEALETGKASPASGPAPASAPRRPSISRFLRALTSRPAGQFGGSPKGSDPATRLSLLAAREVSPGLQMLKALDPAGSSGPAGEGTGSAGPGGEKPASPSASAGAAPSDVVVVARTESFQQPPHFLEMKEVEELSKTFTFYVEIFGIKCRNVSLSSRSFQHVGSRLFCTVSWADLAFYETTEAVACVANPKWISKYHFTWSIPQLSRLHEQSLELSVYEEEGLAPHGISSPQAQSRRVLLGSASVDLLTVATGPVHHDLLLSNPEKGKTDCGRVMVDVRMAQICPLIINPIEILVNLHEPTAGQAIIEEAVSDEEDAEGEEPRAAPFRPPRITDPLSPVHEAEGLTQTR…
TGGT1_276140	H. hammondi strain H.H.34	HHA_276140	ADP ribosylation factor ARF1	+	MGLSVSRLWSRLFGKREMRILMVGLDAAGKTTILYKLKLGEVVTTIPTIGFNVETVEYKNISFTVWDVGGQDKIRPLWRHYFSNTHGLIFVIDSNDRDRIEDAREELHRMLNEDELRDAVLLIFANKQDLPNAMTAAEVTDKLHLHSIRHRNWFIQSTCATTGDGLYEGLDWLSRTLAQKNID
TGGT1_211630	H. hammondi strain H.H.34	HHA_211630	hypothetical protein	+	MGNACKAEGKVRETQPPSKLETSDSTEAEIMAQRRAVSLRRIETAKHEALQKLKTSRALSVHEERRRLHIMKTRHKLGGGYSAGDILAGDSRLAETVDTNFGGLNADLPDDASPEGEDRRQTTRSTSQRQPEGFNSTKLEEQRGPSGQRPIFGATSREKKSMAFFDYVGHTRSGDTFEMAAPSPAAADAAERAAQEALIQKEADLKRVKSQRA
TGGT1_223940	H. hammondi strain H.H.34	HHA_223940	GAP45 protein	+	MGNACKKNTAKTPTRKEAEDLAEKERQEREAKEKAEAEEKARAEAEKNAADKAEAERREAEAREREESARKEAEAEAARKAEEEAAEAAEAERLRKEAEKKKAEEAKRKAEEEQRVAAEEAEQRAREEAERRKAEAAAAAERERQMQEALKQEEMSPREKYDKLASPEDSASETTMATQPQKVAEHSSAAVTDRSVVGYTVTPCDMAAIDETAKYLSKRCGCDLGDQHDENECPICRHIDLSDAPLLN
TGGT1_235490	H. hammondi strain H.H.34	HHA_235490	hypothetical protein	+	MGNADSKSRGDLQLFNLLQIANDRGKDDRGQRSQSPQRGLQGFLEGNLTAKETQDGLGSREEILQTAHHYPDAVAKLLAQLVEICVETADRVSQQSATPSQSSTLLTTTRLLLRLVPILLEDSVLEQRIFWTPLFPLSSDENLLVSDVSAPAATAGDREGKEKNERLSEGRQGARLPQPGEKERDVDEESRDASKQSLEGERWRDSRMSSVASGAFSQTSSRCAPVLLGNEVVNLLFRLLFLRGFTAIVPGAPLSREELLALPKHKVDCRFLWAGGIGAAPEGGAKPPAWIAKNRAEVLNCLVACFAGPLYSTVDEYQLRVPTWIRVATAGNAPYTANLFCSLLSVVCSTDTSTRSVFGIFGNAEVKDMVSSALQLLMILLDFNVGVFVLPDGAEETEG…
TGGT1_262490	H. hammondi strain H.H.34	HHA_262490	alpha/beta hydrolase, putative	+	MGNALKRMVFQPPSPPTYECDANFIWLTTRRRQRIPAFFIDIGASLTIIFSQGNAEDIGMVIKYFTEVSRLWNCNFFVYDYVGYGHSTGKPSEQGVYDSVEAAFEYLTLQLGLPASSIVAYGRSLGTGASCHLASRHRLAGMILQSGLTSIHRVGLNTRFSLPGDMFCNIDKIGKVDCPVFIIHGTKDEIVPVHHGMELYNRCPVSVTPYWVEGGGHNNLELLGRRTFYENVARFLKLVRSRESPDGRSGTLGSTASLFR
TGGT1_267080	H. hammondi strain H.H.34	HHA_267080	26S protease regulatory subunit 4, putative	+	MGNAQPRGGGFPGGAEEDKKKKERKRLEAAPPTHIGKRKKKGKGPVGHSRLPTVTPITKCRLRLLRLERIKDYLLLEEEYILNQEQRKPAEEKNEEDVNRVDELRGSPLSVGNLEEIIDEQHAIVSSSIGPEYYVNILSFVDKDLLEPGCSVLLHNKTSSIVGILNDEVDPLISVMKVEKAPLETYADIGGLEKQIQEVKEAVEFPLTHPEFFDDIGISPPKGVILYGPPGTGKTLLAKAVANETSATFLRVVGSELIQKYLGDGPKLVREMFKLAHEHAPSIVFIDEIDAVGTKRYDATSGGEKEIQRTMLELLNQLDGFESKGDVKVIMATNRIESLDPALIRPGRIDRKIQLPNPDAKTKRKIFQIHTAKMTMADDVDLEEFVMAKDELSGADIKA…
TGGT1_245710	H. hammondi strain H.H.34	HHA_245710	phosphatidylinositol-4-phosphate 5-kinase, putative	+	MGNCACPRSLIGDTSDEVIFGQDGKRQGFGGKIGSREKREVTFENGAVYNGEWTGDVRDGYGVQIWDDGARYEGQWVNDKAQGKGKFVHVDGDVYFGDWYEDKAHGYGVYNHADGSKYEGQWYEDKQHGKGAEQWPDGAKYEGQYSNGKKHGKGTFSWADGSVYEGDFVNNDIHGFGVYCWADGRRYEGEWEKNRMHGQGKFQWADGRIYQGDYRHDQKDGKGTFSWPDGRKYIGSWRNGKQHGRGTYITSKNEQRNGEWEDGRRIKWLKEGE
TGGT1_310420	H. hammondi strain H.H.34	HHA_310420	hypothetical protein	+	MGNCLSGGAQPARESGSAASPEKPANPEPAVPASPVEKEESAVEQKKEETSEQPAQEASAAAATTEAAPAGEVADAATAEAAPVENAEEAKPAAEAATIEAAPAEPAKLSVEISGPPPLKAPPPPPQATIQSKKSESAAQA
TGGT1_212210	H. hammondi strain H.H.34	HHA_212210	hypothetical protein	+	MGNEQSLEAQGQRPEQVPNAETGLGEPAKEAVPAQAYVEAPKDDNSKDPPPLINQGFSRYLSGLGDFFSTDSASAVSASSEVVNNLGSYMSLEAVKEALTGEDKADEAPSSSSQEPSKDAPANDAKVAEYTEQESSAAGLTAYLTTSFDGVSELFRSLTQESSVVATEASAAAQEKGDNIQSYLPAGMEGVSALFKTGSSENNEVLPSFQDAEKAAPVPSSKTATSETPLVEEPAAPTATKEQAPPSTSEEEAPPSITAKPATPSTTEEQAAPTATEETE
TGGT1_219710	H. hammondi strain H.H.34	HHA_219710	hypothetical protein	+	MGNEVASHQGASASPSRAFRGLERSERGDQRQEGEVAQTRDGAGFDFQPFLLPRRNVPCSTRSSLCSAELPAAAAVLNGQYPFLLFASADHLIPLEAAVAHSLSSSAFASTASSSAACPSSSSKDNTRKKEQRKKGGGGRGEEGKHEGEGEENPLVSLLSFDGSRSFPRTEAALDVSTYNVALLREALRAGPQGRTGREKGDSLLAWPSPFPAFLPPGRAIDTNQLFVAYAVKGGVRVMPIVGSADGGVEETYKAPLYVPPALSAGAPQAKPSAVSVALYQGAKPQFLLVSDSNNLVSIFKLAPPVSAGSRSSSGGASSFLLLQLPKPEEPLAHLSSAGAASQSVSSAAQSASPIYVAWVPPVAGGLQEEAAQPGREQGCGLASTDVYFVTVERHQVIL…
TGGT1_306660	H. hammondi strain H.H.34	HHA_306660	RNA pseudouridine synthase superfamily protein	+	MGNGVSAPPGGAGLDGPASALQGSPFVSSAVLSSASRRRSSRLHTACEAKAAGASVDEAFYSAVDPPKVPSASSCALKGLPLPLPLLPALSDSALPPPPSSTRSEPPYLSPWLSSSPDSLSPCSSCPAHPPSRRSSRPSSAFGRGSPDCSRSGTTLIPEAASHALRDKNLDAISGLPPASDMAYGVLCPGAVSCTEDNGPGAFLLDSAALPKGRENAHLAAGDSSLPMGERAAGGEGCLVSCFPPALSREAISAYIARSSRGYLLEAVRQEADNRCLSDDEMGTLPPGGADGSGSSLVADSPAIGAAERTKNSGALLSDHLFLLPAASGGAPAVNPASKPLQTGVALSPSCLSCPTAHSTSRGATGTREAGQIVSRLAGCVEDALVSEALKGTLQPGET…
TGGT1_214575	H. hammondi strain H.H.34	HHA_214575	hypothetical protein	+	MGNICQKPTIVERPPIRNIGKYSVDVGPVNVDRTGRCTRRIVQGIGANFHIQGLEAGKTYRVSFNCPYVEDCRGGDQVTFTTATV
TGGT1_255245	H. hammondi strain H.H.34	HHA_255245	hypothetical protein	+	MGNLLSSLLPPRVHKRLNRLWTNSYWLVSTVAWVASTAAITLAAPVIFHYEKECQMFETQAQFYQQQQALLASGVAGAAAGAAGATPAV
TGGT1_309990	H. hammondi strain H.H.34	HHA_309990	hypothetical protein	+	MGNMCAMCFNPGKAASCSCFNLAVAVLLFGVYYGLVGGMDLYQATKSHPVLVTQKYNAIFTLSVATALLVSVVLGVLKLGIISYIFTMVVFVLQLSDAIFKLVTFILNWVDWGIALHDGTMSFQSAMVTSSISQLLTIILTFSMANILYSAAMVYKVGGNGCEYRNYKQIESSKSASNTKKEDSEAATEV
TGGT1_285190	H. hammondi strain H.H.34	HHA_285190	zinc finger, C3HC4 type (RING finger) domain-containing protein	+	MGNNNSSGGARPHAPGGAGGSSNLASRPLGVPASSAANSQSSAAASGSPLRGHCYACDVRGPATVDSASGDLVCGGCGAVGFVERLPETAAAPSSSVPPSASGIPAGAGGSAASDPAAVVENAFGIPVGELMTQLMGGLAGLQSEDTGLFFYGDADFEEQGAEGRSSGRASQGDPLCPRVVFGSEQQRQQEDARRMIRSVFGASVGQGPLGHGTRGDGPVQNSGQAPFIQLGNLVMQALNQALSGGAAAGLGVGEDAMDQILTMIMQNDVNRYGSPPAAASVIRSLREETLTEEQAREAGPCAICQEDYSREDVVHRLTEDASQCSHVFHRQCIIPWLEQHNSCPVCRFELPTDDAAYNQRRAELRNRVRSTLTSVAAAASNSSSPSAQGPAGQGGECE…
TGGT1_222960	H. hammondi strain H.H.34	HHA_222960	SCY kinase-related protein (incomplete catalytic triad)	+	MGNPLLKLYSVDKEKAIDGGRFLRWTIYRGHQKDRSSSASSLVSLFCFDKKALTVSPFSSSPSLRSSLLSLLQQEAQLLQRLRHPQLLHLVEPLQDDKNSLVFCTRLVETTLREQLYEQCRPHSGGRGPSSSEAGPYSSAYTGESEAGGSSARGKIVPLSLLEIKSGLLDLGEALQFLHADAQLVHLNVNPDSVFFTPKGQWRLGGLGFAQEILGDGSAGKLVDCGFSFGAPSGSAQAQVSVVPPLYYSAPELAASHPGKCSRASDIFSLGLLMAEVLGAGAGSEARLLKTNEWDVSAHQAQCQRLLPLRPTMFANSPYFSMPSAAASLPTLIALLSSMLSPDPSQRPSIEQFLQSPFFQDMNMRALRFLESLHEKDESQKIQFLKGFLPLLQQEEEFH…
TGGT1_261440	H. hammondi strain H.H.34	HHA_261440	ARM repeats containing protein	+	MGNQCCAGRDNAYKRKAQENEYGNRGSFRHMLSFGAVGDDVVRFDRAYDNNDIAEFVRLCSSTCEIEKLEERMHPWAADPETIGALAATQLAIFSSREQEPHMKDEIREAGGIEALVKLLASKELDRKHAAVVALSFLSVDNVENCIAMYNAGALPYLIQGMKGDIEGMRAACAQTARNIYVLDVKYRREFMKNGGVTQLVRFLDINPEATNVYTQLEAIYHLEDLIGDENDEIPEFVQAVKAAGAIPKLKKLQDCKDQDVADAANLLLVRLSE
TGGT1_240630	H. hammondi strain H.H.34	HHA_240630	ULK kinase	+	MGNQQAGCSGVRGRGWDTERRGLRGFDGNYRPLRVLGSGQFSTVYECVRVEDPSERYAMKVMSCWTWDSRTLRRIEEEISIMQELGQSHTCLVRLVDSYKERICLSQTSRSRGEPNSFPFDNLPKSSMPRATGVPVSDTQPPLPSSRPSTAIVEQSFQSTDDSRMRCIWRIALVLDFCGGGDLADYLNRHGALDENQARNIIFKICHGLAFLHERGIIHRDIKPENILIAKDDGNTLDIKISDFGLAKKMSGRFHRSLSLCGSDFYLPPEMLQQRPYDTQADMWSLGVLSFAVLFGCSAFCSMEMTTLYQQIIERRLSILPSSPKSTVSAGAWKFLLDLLQVQPYKRLNAHQALKHRWLRGSLSAEELRGLPAVSVDGLPNSSLPHGGNKEGIDVDKAV…
TGGT1_232815	H. hammondi strain H.H.34	HHA_232815	Erv1 / Alr family protein	+	MGNSAGAYSFRNQQVAAAVPTSRESSLEDARKQPSRSDASTGSVPSSTASFGEQNANTSPGVEGERVDKSNATRSAAVRVTLPAVSGGHAHVSGVTTAPAGVTPQGAQISSPAVESGVGPESGAQRPSMHPPIHFCAETNDPQDPCNAQWLLLWTYAAYASPRPSAEEQQHLRVFFEEFPDQCTFGSAARCYSEAVKTFPPRVESRRDLMLWLCLVENQCRLKLDMPTRPCRYSELVRRWRYDDGYL
TGGT1_316540	H. hammondi strain H.H.34	HHA_316540	IMC sub-compartment protein ISP3	+	MGNTACCGFDSDSTADLEIGREGEVRSRKPIQVSKEAFDNWMNRYEAGDTMEVLFPDGNRIECNLKIDRPKNFMNLAFNQKVRPIQLDDIAAVLYGSDPRSSECADSKMLRNPRVVGFRLASSGRAIAFSFKDVTDAQCFVSFLDEEIKKNQESNKSSASSGKN
TGGT1_237820;TGGT1_260820	H. hammondi strain H.H.34	HHA_237820	IMC sub-compartment protein ISP2	+	MGNTCKSCCGESADTDLEIEAPENGYETSSSHEELPKHYRPDFLERLQKGLTIGLILQDKSRLDCKVRLTQGNSAIELSCERKSRVVNLSGIRNILYTAEQLRRVDCSAGISKDDYCVALHLTSSGNCIPLFFSNPEDRDCFVLVLQELRSASPAAGASA
TGGT1_310930	H. hammondi strain H.H.34	HHA_310930	hypothetical protein	+	MGNTESTAAELHDNYLAVLKSVENRLGQYPSRTLSLRSQSSGVDRSRARVGSEEAYRDPGKRDAGNRPRNVPSKGDKPSRSAHKSGSTSSVDQLNDGTGANRKRGKDRVQRRDDAPPQAAEEHSSLHPADGKRRPAAKGETPNVESTATGSDWGDSAVNDFAEEDSCAVESPAHFKLQTKESGVKAPSPRLFPCETLYEVTSQIDLADEKTHVEDGALSSVPSSPTASAEVATEKPGEGRTATREDTRTGRSAEGGREPCHTEKHVDGADAKENESENASGESNQNLRRRSDARRASSRGSRDEASNSGGRPSQAKPSQLSKQIRKKELAPEPLRAADIDLSSDGGGASLKGGKGVEGDAEGDTVADLAAGFEGFSPYSPSYSLGFSQPTSKKAGKTTA…
TGGT1_249970	H. hammondi strain H.H.34	HHA_249970	hypothetical protein	+	MGNTMSCFDRWGKRAPDGPLLHIKTKTAGGGSDIIQAASTASTAAASTAPAPAAPGAAASPGPAAPVPERPLRRRQTYSLKAKKSDTEMSSLSELSDESESEPDNDAVSASDIRMKKVMQYRRALTKVVKLKTHLFSETVKVTCSKDGEQVQWFKGKSAAGAQDRKKPSGGFPVDKITSVKSQADNTKVLVITVNNPQPTTYNFTFKSPGERESWQEQIQSLMKFMSMK
TGGT1_243800	H. hammondi strain H.H.34	HHA_243800	long-chain fatty acid CoA ligase, putative	+	MGNTQSGPQIVYNVPIEDAVPAGKKRTSIYRSVFSPDAIVDNFADRPCQSAWDLFQRGVAISAEKRCLGTRVKNPDGTLGPYQWKTYREVEQLALEVGSGILSLPDAAPKLHFEEETFQQDLRFLAFYSKNREEWAICEQACNAYGITIVPLYDTLGPESTAFILAQTQLRSVVASEECARRLLESVEAAKSSLSGEPEEAMNSSPVPPETSEDVTAKTTEGAGKEEAKETAGNEDEKEAVGELNAGESKAEKEEIFVKYLFLMDDPGAPAKDLLDRATKLGIQVFTWRQLLEKGKENPIPLTDDVVAKLSTVSTVCYTSGTTSRPKGVLMSHGNFVATIAGAVRGPLTVPSMALHPEDTYLSYLPLAHVYERSLQNILFCLGGSVGFYGGNTLKLLDD…
TGGT1_299970	H. hammondi strain H.H.34	HHA_299970	tetratricopeptide repeat-containing protein	+	MGNTVQSPRSRHYGYSSMRTGPDGDSPLHADASLCGWQSAHALASDSRYSMMCCQSNGRKVEQFKTRDEALATARYYRDRNFDLALHAYSAALDFPTGSGSQNNPYRRRVEVVQLSEELQKLPETSEAGRGTEGESCRAASTCGDCEREASLSKAEICSASTALSVGGGSSSRLQSEELHDVSLEVKTEKSEDGYISLPGLPPLTPALLEQDRDDSSTRSGLGAGRFFQSSSSSLALEAAAASTKESGALLTAKICDEIAQLYLTRGEKEDALRYYNRAISLAPAVVVFIYRRGVVLQLLGQEEAAVFAFRRALQVDPEYKPALFNLGTCLMRREDSRDEARSIFQKLATLEPADDQVLSLVAHCYEMDSRFEEALMYRQRVVQLDPQNFRANRELKQL…
TGGT1_242070	H. hammondi strain H.H.34	HHA_242070	cAMP-dependent protein kinase regulatory subunit	+	MGNVCECQKAEIVNEVSLAAPVVTKGNKGKGATGSSSSGQKASGSKAASSNSSTVVPQLTEDDLDTEDEKDDDVVEDMPQPSEAYMSRAKNRQSVSAEAYGEWNKRKKFVAPVYPKTAEQKERITKVIESSFLFSSLDIEDLETVINAFQEVSVKKGTVIIRQGDDGDRLYLIETGEVDVMKKFPGEKENKFLCKMHPGDAFGELALMYNAPRAATVIAADDMLLWALDRDSFTNIVRDAAAKKREIFEESLKEVRILEDMDPYERSKLSDALRTATYEDGDVIIREGETGDTFYILLEGAAEAIKNDKVVMEYKKGGFFGELALLKDQPRAATVVAKSHVQVAYMDRKSFKRLLGPVEQILMRNQDNYRKAMKQLGLDTKYLDK
TGGT1_289615	H. hammondi strain H.H.34	HHA_289615	hypothetical protein	+	MGNVCNFCRNGRRAEQGKELQTSEPGAGAAYPSCGSDTSPARRPSRRRSKGSIKGLGREFSFRPAGTASGFSNDTPGGGQESDGSKRTSSPSLRSSRTLAPEEEDQLRSFYERNLVEQERHMSYILNEEAKLRRGKPYSRTPTLQAGEGPEALVPVDPEEVNEAMARFDVFSPDERQSRVDEILEKYVEAQVEGCDMQSARSSGGLASPGSSMHG
TGGT1_264990	H. hammondi strain H.H.34	HHA_264990	hypothetical protein	+	MGNVIEQFHTERLDQRYGVLTTPDGKKRAMKPEDCRPRYYERTYREGDPEMPEDPEFPAKLLKAAQDHEWQIENGADGLSIMYPGKRQAKLWVGHVRVVNPEDRICPENGNANMSLDDLIHQGLLTPFYKTPSGAAVPERQGENDKVPQSAALSASRQQSEENKRLAEQHLRMSVNERMKFTNAQAQQQVMRTDIPQMAGTPRMPAPQPFPSMFSGAPSTYPMYPTAFPQPQMCAMPPSVNQPPPGVATGMYPPLLPIY
TGGT1_271380	H. hammondi strain H.H.34	HHA_271380	PUB domain-containing protein	+	MGQACTRQRSLGACRGEEEASRTSGPQTAFESLREKNCMYDAANAREHKGSCHSDARGGAERDTFKAGAASVEDTSANAGGAPPASRLLEGEKQVNTRKKWKPASPSLVYCLINSLADRHLAVVFDCRERDKYEVNHLHYAICPWRSSHDVAAVLEYFEKHGTPLVTNADLFKQKKGLAPPVSKSAAANPAARSPRFVFPAFLSRTQTLPSSAKKSEKKRDSKGENTPPSPLVFTPQAGASDSTAPSLVALNSQRSQTQREEESGKSGDKECGNRRDTLAEPGEPETSGADAEAPTAENHGLGVHTVLADRATVAAAAMKRASPSRCLSGRDDLSSSLPSTSQIAPEDAEQKEAEEKAEEAADVEPEEEPKRLAALKTWLRTVCKFRTVIMYGEGDDDP…
TGGT1_320760	H. hammondi strain H.H.34	HHA_320760	hypothetical protein	+	MGQGGSKKKDGIGAQLREQAKLIKRVQEYLKKLDKLFAEWEKTHRGISRATDSFFGAGTPYRDNAVAIMQHLKIFEKARADLRPQIVAVGETAAELLKKAKNIEKLVEDRDQLSRKVTAHNKKLNRLKTRNSERPDAKTQQDILKAEEKLNAMMNQFKIKEMQAQFETNNAMNTKYLDAATLVHRSVLIAVTFLRVTTPEMLKAEGYLGVVQPKGTGLHPLGRSGSGQPVMFPLGGNPSISPDPIQSEMRPVSPSNGFGPIMPTAPSSPTHMGSSIRHGNEWGPSESPVAQQEGARGLNGVANGHPSSTTSPHDEVMGHSMDSTSCNEVFQHGILTQKYKEGMVQIAEPRNPFDPEI
TGGT1_313380	H. hammondi strain H.H.34	HHA_313380	hypothetical protein	+	MGQKLTVEERRNIKREVYMIYPGLEQQLEMAFTCHDLQHEGKLPYTTLEPIIRHLLMQYGLIEYVTRFSDSEGCLDANQIRAELNEFGVNTGGLCCGSSLTLEDFKSLAVIWLRKILDCHADDQAVWMAKLKAEQEEQAEAYTRAMREFQDTFTQQHALYQQGLREQQKQISDWNKLLEDAQKTQQTIYEQEVRRMEEARLKEATAAEEAMKEQIDLISQYKEKLEKIAAADTSGKCFVYPAAATPYGACASAGAQEPTRRRRVKKEHPSRACC
TGGT1_305860	H. hammondi strain H.H.34	HHA_301440	calcium-dependent protein kinase CDPK1	+	MGQQESTLGGAAGEPRLRGHAAGTSGGPGDHLHATPGMFVQHSTAIFSDRYKGQRVLGKGSFGEVILCKDKITGQECAVKVISKRQVKQKTDKESLLREVQLLKQLDHPNIMKLYEFFEDKGYFYLVGEVYTGGELFDEIISRKRFSEVDAARIIRQVLSGITYMHKNKVVHRDLKPENLLLESKSKDANIRIIDFGLSTHFEASKKMKDKIGTAYYIAPEVLHGTYDEKCDVWSTGVILYILLSGCPPFNGANEYDILKKVEKGKYTFELPQWKKVSESAKDLIRKMLTYVPSMRISARDALDHEWIQTYTKEQISVDVPSLDNAILNIRQFQGTQKLAQAALLYMGSKLTSQDETKELTAIFHKMDKNGDGQLDRAELIEGYKELMRMKGQDSSMLD…
TGGT1_277870	H. hammondi strain H.H.34	HHA_277870	hypothetical protein	+	MGQTQSIDLSDDGVDDVQIRRRERDEMRTTRRRKPEAKKRLDAYMKHTEAPNHIRAIREAGREREKDDGGIEGTFEIADLVRKKKPKEDSEEFKVDGPLMDLPEYEQSESESSSSDDEDRGQYHFEISTLQKDAPLAVTDPEAHPVIIEGECAVGKELKLRDRSPLAGDFPIFRVEWYLGTDIGDAEKFSVHYASEGSASLPFSVPADAVGKYIQAKAYRNVEDQLHETQLASTKAGVYDPHIGGPRHTDYLPPAGVVRVCSTAVSGPGLISDACAYVLLKCLARGAFTCAVKLRDFWKRDSYGETFVSLEGSRALTKSGKKLPATLFVDNAGLLQLRYRLADVVKLTGANGSDLGVLGVDLFGGLLGVPTPDGTAGLWGDAEVDDGPAAPAKVEDLEK…
TGGT1_297150	H. hammondi strain H.H.34	HHA_297150	MORN repeat-containing protein	+	MGSALSACRCFEFEPFVDHTSERSANAADPNKVIYEGAYKDGKRHGFGVLLRPCGSRFEGFFLNDAANGFGKFVHPSGDAYEGQWKDNKAHGTGKFTHADGSFYEGQWVCDVQEGEGREQWIDGSSYAGSYRGGLKSGRGQFTFSDGSRYEGQFLENDIHGEGTYVWSDGKSYSGQWIRNHMNGKGRMLFPDGRMHEGEYVDDRKHGRGRLIWPDGRCFEGEWREGRQVPGIGVFRDSAGQEIPNPRLLKPKNPTNSAAFLKQGSPNVLSDGSKGTSNSGKGEAEQRSRRRSLFSISRSHQSRKSAEVSRHPTGGSFSVLRQNEGGGSCASLEKTKGRDKEEKEGKEEEKDEDEEAGDLKAKAGRSSRVSTWSNGGTGPGQERGKRDVSAEEFEGEQRR…
TGGT1_262450	H. hammondi strain H.H.34	HHA_262450	hypothetical protein	+	MGSGSSRPGEAEGGAYYGPGEAARQMEAFLFAVHRLASSNPSEAMAAALCETQGVDDVVCSSSLASTNLLRCEDPVLQWDSLLLSLGESAVRPFSLSTPFLWNEVLRPLLRGNPRNGQVKALYLFFAHTLFRYAEAVEALHRRHSSSPSPSQGVEPTREDRRTQTANLMASSESPKEAACDQDAASSVGELVPDAVPFPCTDLSIAELALLLRLLTKALCTQLSLPQLLYHLEYVSSSPDSACLSTAMRDELFGLSQAFFASLGSKRQRSSSISFQPINASESASSNTSLSSSRPSPSGVSQSPSPPVPDAASAPSRSRPARRGEDKEELNGQMDFHEASELHCSLSEMKHSDEAPEFPISSPPSASPAFFGADPTTTPTTTATLDNVGGAEASKRASC…
TGGT1_265270	H. hammondi strain H.H.34	HHA_265270	hypothetical protein	+	MGSNCCKNALHQTKPSVPPPDLPPPDPGAPWPGDTFRRAPAVSAPVEPDGALPSTEFSSSAHWTSSSVSGFMGRLSPLTTFESCLGEDDATNDAPTRAFPVPHPVAEKAEPAASRPSADEEHQKSRKKSLSRLRVSFPEETRRFPFPFTRRKRRDSETDQRGENRESRENRDGVESSRKEAGREERANRVSQLDFEDHHLMSYPPPGFPSSSTAVVDKVPESERADGGEGEDKKSGGTRSGKLLSRFRQSLRRGDRGVTLGGGKRQGRDVGKANQGEKTLRKRGSSSSTQVGEEGGCRDKSARAEEERAGRRSAGDPRHPVGGVASPDSEDTTTIGSPLSNREDDLERR
TGGT1_240550	H. hammondi strain H.H.34	HHA_240550	copper chaperone COX17-1, putative	+	MGSQASTPASTTSPAEQPGSTSSCSKRVNAAGKRICCVCKETKAARDECILLNGEEKCKNFIDAHNQCLRSEGFDVQ
TGGT1_293470	H. hammondi strain H.H.34	HHA_293470	hypothetical protein	+	MGTVCTKNRADSTKTAGTSKATADEAERAVAVEEGLKAAREIEAVTGAPAAVTRDGEVIVAIDEEDRKQLNEERTNSVDEAAAAVVQHSPEPAAVIRKEEVVTVKSDNGDTRVHVTVVEAVISSDLPDLPDHVENVSAEDLELLRQAREQMMATGGPVVTDITTSDQQTSQINKPSASAYGYLLFLPDKGGSLTLLWSKKQLSAEEEENAGKVLLSFVPALHKNVPRMKYEKKGGKTELLTDIEAKWSVWKVNEKQRYYAAWATVLKTTNEYEAKVTVREWTEEMPPQVFISLLHVGPVGNKVASLPRGHPVDLGVFSHIAVVPADKNKEFKDGLNLSEKKFQDLAVAAGGADQRFVPRGIARTLGQDDVVAWMKEDGIDISKNKQGLTLDGRKVDRANA
TGGT1_305860	H. hammondi strain H.H.34	HHA_242400	calcium-dependent protein kinase CDPK2B	-	MHNFPHCFCPPRSHQHAVPTESDSGPLLAQQESGSKHRHGNLRYRDTDAAGYGRGVGGRGQGDGTCEHHGFASNSPDQQCGEVAPRGLLGPDGLPCAGSSGPASPTNAGKFRREGFILSYSGPLTDYYDVETKKLGQGTYGSVCRAVNKATKNVRAVKTIPKAKVKNIKRFKQEIAIMKCLDHPNIIKLYETFEDHKNIYLVLELCKGGELFDRIIEEGYFSEMYAGTLMRQAFAALYYMHQHGIAHRDLKPENFLFADKSKEAPLKIIDFGLAARAGPTTILATKAGTPYYVAPQVLQGKYTYKCDIWSAGVIMYILLCGYPPFHGDNDAEILAKVKSGKFSFNEQDWKNVSVEAKDLIRKLLTYDPAQRLTAEQALAHPWIKHYATKANPVADAPLN…
TGGT1_237820;TGGT1_260820	H. hammondi strain H.H.34	HHA_291005	hypothetical protein	-	MLIDTIEQKITIKCEEKARIISFSGIKNLLSTPTQLKRVETKADLSNETSVVGVHLLKSESCIPIKLASADEKTNFIAAMKTFGVPPPRSEQRKSSSRPRA
TGGT1_305860	H. hammondi strain H.H.34	HHA_224950	calcium-dependent protein kinase CDPK5	-	MMPVAAAETSPMTTAVVPADSVACSRLQMRLNGDAAGAQGFCVATPRTEKASATRCSTPCNMFSGRNTNVPEDGKDAAAVGEGNTKRGLDDFDADYGCRGGDCCDASTKPHFFSLCTKCANEGKDKSQHDRREPVRGLIIRSESFMNASEASRWEIEAQCNNTCPGDGFDGASGASAVDGVPASPRPDAPVFDRSKIVHEVLLKDGQQITDIYDTPNGTSLGKGSYGSVVKAKDLKTGVMRAIKIVYKPRIDNVTRLKREILIMKRLDHPNIIKLLEVYEDMKNLYLVMELCTGGELFERIIKSGHFSERYAASLMKQVFSAASYCHSQNVIHRDLKPENLLYADSSPLSALKVIDWGFAARCGKSHKFSSVVGTPYYVAPEVLFGKYGSECDMWSAGV…
TGGT1_292120	H. hammondi strain H.H.34	HHA_230490	phosphatidylinositol-4-phosphate 5-kinase	-	MRTCCGRTQATRRSAGDVSPSDEVAKSPLGFTHTLQGHARLPAKMERTLLEDILTKTNLGPKEIKDLYNRFRKIAPDGSLPFSRFCDTLGVLGMVDETFLAERLFNAFDTNGDSRLSFTEFAVALGTMMRGSDDEKLNLSFKILNPTYGGGATCLADYGLGGFEEEASEWEQTSVASARAGGLREPSLPSPSSWLPELLSLQRYEELKPQIERDTIGAEDFVLLIHCVEQTRSALIGGTQPSSSDAEIRRVFVQNATLMPDGTSRMMLLDFKQAVRTSPAFLALLGVLPQELAADTSAGHQCIPAAKKAVSMQASRRRHSDAQSSADSRSESRRDSVEAVKQELQRVREELGRVVEFVNSVVSVVQKEQDTSDAIIAHVIKDAEEDAAHLADGTAAACT…
TGGT1_243800	H. hammondi strain H.H.34	HHA_247760	AMP-binding enzyme domain-containing protein	-	MSGVQEDQKRHPGLVARLSPRRTWRGIYAVPVEGIPKKEGESAVYRCVESEQSGVPVKTLPAILEDFPEIRSPFDTLYCAAQAFSNDPFLGVREKLPLPVFPATSQEETDTGTGSSATTAKTPEARPARADGEVPATGQKGVPSSKTTPGGERLATGGTTPATSPSKDCTSGLQSTPSAQSFGESCRKSCLGFGEYKWLSYKETLKQVQSLAWALNNEVDIPVCSFGADAEVQENYRFAGIWARSSAAWRITDYACNAANIVSVPLYDTLGHEALLYIIGLTKLQVLFVEGAKLHPALNLVTEEKVPLKAVICFDSITPEEVEEFATQSVKLYAFDDLIQKGMGEKHERPELSLDDICTVIFTSGTTGVPKGVVHTNGGFVATIAGYVGCNNRMNLRRG…

## Sheet: Neospora
Input Ortholog(s)	Organism	Gene ID	Protein name (Neospora)	MG	Predicted Protein Sequence
TGGT1_242070	N. caninum Liverpool	NCLIV_055220	putative CAMP-dependent protein kinase regulatory subunit	-	MAGATAAYQEYINTKLNPILEGLVVEVLLEHPDDPVTFMISRLCQRAGIPDPVAGAAGGKSEAEELKVEISLLREQLGKLQNAGDGSPVETHESDESDEEQDDAVEDDDDEAVMSRFKNLNKMRCSVSAEVYGEWNKKKNFVAPVYEKDEDQKERLERILRQSFLFNSLDEKDLNTVILAMQEKKIEANTRLICEGDDGECLYIVESGELNCSKLLEGEEKVVKVVGPGDAFGELALLYNAPRAATVTSVTACDLWELGRDTFNAIVKDAATKRRSMYDAFLKSVHILDGMDAYERGKVADALRTEMFTDGAYIVRQGELGDIFYIVEEGSAIATKSFGPGQPPIEVKKYQAGDYFGELALINGEPRAANVIAQGICKVACLERKSFKRLMGSVQDLLS…
TGGT1_311360	N. caninum Liverpool	NCLIV_055260	putative AGC kinase TgPKG1	-	MDTGERERGREKDEKVDEAVVSSSRSLQSAVEAFERTVTRLACLREGENGETQHAKRTEESEDNIEAVGKAGLNKRHREISAALTIGAVSAAAAAATAASQTERELPQQIWRPHRTRVPRKRTDRKWERLNSTVHGGLPFGRHPGGQLGEKSDLDCFVCSGGDRKPAQKAILKQDDCHTEEEKLSAHLAYREKTPADFALIRDSLKANLVCSSLNEGEIDALAVAMQFFTFKKGDVVTRQGEPGSYFFIIHSGTFDVLVNEKRVNAMDKGKAFGEIALIHNTERSATVVASSTEGALWGVQRHTFRETLKQLSSRNFAENRQFLASVKFFEMLTEAQKNVITNALVVENFKPGQPIVKEGDAGDVLYILKSGKAKVSIGGKEIRILRKGDYFGERALLY…
TGGT1_319510	N. caninum Liverpool	NCLIV_010650	conserved hypothetical protein	+	MGAAASSPGGAGASQAGLGSGDNQTPSAAGRDLFASAVVDVPSSAGVKHVVILGNDFVNNFAVFPSQTSVFPPHQAKKTNPNKTMQEELKTDSPGPVVPRDDPSADLVQRHKMAGTERLGLEQSASPGETPFLGEKGDSLSLGGGQPTQAQGPDAAAMATQQKKELLSDMRNHLKAALVEQMTVLRQGLAACPLTQAAASAASATADASLRQVASVLPEERETVSPGSWSEDIKSVSFPRPTCHDEQLAVLQCYSRQRKGEKEGRADYLSCHSVVADLRACSERATQLAPLTRQSAVN
TGGT1_267280	N. caninum Liverpool	NCLIV_038880	conserved hypothetical protein	+	MGAATSFPSSASSSSSLPPPSHRFASVVTSASHLPPATRPPVVSGFFSFRLASAPSFFQDSGLAPFLPKVFSLFSTSNPSPASASPAPCGVATLSARLRSRKNRTAHGGILVASFSRIEVLSAVFGCSLYELAFPREWGGCACGALNEDASLGGARGVVFLAFRDGKIRCFSPENVAFLGELALPFAAHDQARGDAQAGDCEQEGTENRRRTDQDESGRIRLQGNRHLSRKETADAHKHSIQPFPSSASAPAFPTVLTCPMNNSVICGDASGAVCAFFLETRQIAATYNVPECILDRQKALRARWRRKDRQVCNPCSEARRQETEKRRGERSEAREKENVDGSPSSSFASSSVNGVSPFCGDAQDSRGLLSVSTLHCEKRLLFVAYGPPSSAALPSPST…
TGGT1_281580	N. caninum Liverpool	NCLIV_023520	hypothetical protein	+	MGACKSKAAKPAREGEAADSPSDAAEANASQSSPESPTAEAPALVSNSGDSQPAVKSSTRLRGASCSTAFSSSSSFAQSADCDPAEKGKRGPQAQTPANAEEPSSGVETVGDVRRRRLTVLGVPETETEKADSAAGAPASLSERFKNPDAEKATRFSASRSTISERLPDASAQSPSTVHTPGVSVNGPAREVEKAKHEEPVSLSALVRQGSFARSLHSSPPASVDGRSLILKDDEKDKSGRGDKGEGRVSDADEAELIQQIRREKSLPVAVEGDDPVAAKALSLSREQPVVAPSEADDASVFSGPEGTRSDSGQAASAQLVPAPRGPLPVSREDVWRHPELLTASLFLDLFTPARDSPACCFLGAEAHSRQESFDDKFEDVAIRPPGSNVLAIKKNLGF…
TGGT1_292120	N. caninum Liverpool	NCLIV_012830	putative MORN repeat-containing protein	+	MGACKSKPKAKRPAEADGDNVGAAAPTAAPVEADTEMQNQGAATSPEGDAPPSQAEGNADAQPELEGDGQQGQAEPAEGADGSGEAGKAETPGDEPEGDRAANPAAGGYDMSAEPEVDVRTVEGDGVVGELVSRPVVTLANGVTYVGQWLGTKKHGQGVQQWPDGAKYVGQWKNGFADGQGIFTHADGDYYEGQWRMDKANGYGEYRHSDGSEYRGGWRDDKKHGEAVEKWADGSHFEGQYANGKKEGEGSFTWPEGSLYRGQFRENEIHGQGRYIWADGRCYDGQWAHNRMNGEGVFTWSDGRKYIGGYVNDKKEGQGTFLWTDGRSFRGGWLNGKQHGIGEFTARSGEKKRGEWDHGVRKRWLEDNEDVNEQGQVVKAETGATAPESAPGRTDTSGR…
TGGT1_262390	N. caninum Liverpool	NCLIV_025440	hypothetical protein	+	MGAEQSAVASPGEGRGARASFASASSLGGGEQEYASPREHPRSEAHVGQDARRCRRGSEEEAGSQTRAPPSPSAASSGRLGAYLPSALSRSATWASSFLWRRHASSLSPRQAHEVETVPSCACQGSIAHPPASPSGPGSLPASSHIFFAPRPGEPPYAASAASSGDGSLRTRSATVTLPPHFLFQPGSIREAILQPGAAPDSLREKRLSFSSSSVDSPYQTASSSVPASSLSSSLPSASFADSSHAERGGSGGPKPPLSAPVQPSSRLPGGLYPTPSSLRGGRSAPSSQPALQAPHIHFGVHMPQQVTASPEDALGDKREREETPRSPAAAARAAFQSSRERGSGDDARAEGKEGRKRFTEPSRTGDTGSPRCPLGGKELRDAQDTGVATPPFSSSSMP…
TGGT1_261980	N. caninum Liverpool	NCLIV_025630	putative gorasp2-prov protein	+	MGAGQSLDQRGTLAVGEKARGGAYRVVKIQRGSPAEAAGLEIFFDFITQIDDVPLTSPTEETLQAFFAKVNQSNDPEPVQLVVFNARMRGFRTVTLRPAVLLPPTSRAHRSAASSVFSLGLSVSFSDVGNVMSEGVRVLSVAPNSPAAHAGLVEREDWILADSQGVFRDVEDLVDSVSAALNRHLQIFVFNAATESIREVLIVPNSDWGGEGSLGCELGSGYLHRLPFSRRALTADAVPTEKSPNASQFPLSAADGEPTEAARARAVPSGATGESEAPGAPRASRPTSETAPDGGGDSVSPGEANGSEACGRHLAGRPEGGREDAHALRASNGQGNVAEDRNEKEEMYILDSDGAPVLLTPSANFQDAYPPYAHGFDEDAWGLIPSFPEDSEDDSTDEF…
TGGT1_290200	N. caninum Liverpool	NCLIV_042450	putative opine dehydrogenase	+	MGAPSTVSAGVAAQSKAPLLTVCICGGGNAAHAAAAWLGQAHKNIRVNVLTRQPEKWQKEIRMETKICRWSHLGSISGKLNAVSADPAEVVPEADVCLVCAPANAHFPLLEKIRGHLKAGGIVGTVFGQGGFDWAMLKAFEPEECRKKLGGYFALQNLPWLCRTLSYGSVVELIGPKDYLNATVVPGSLAQPVRLLISLLFDMPCRLLPNFMCITLSPSNQIIHPARYYSIFHKWDGKTPMKESEIQWGLYNEFDDLAAEWLEKLSTELQAIKKALTNKFPELDLSSVLPIKERVIQHYGDDVKDTSTLQKVFATNRGYAGCKTPATPVEGGFIPAVNGRLFNEDVPFGLCVLKDIAEQMDVPTPSIDFMIDWHQKLMGKEFLKDGKLNPEMIPQTSAP…
TGGT1_265270	N. caninum Liverpool	NCLIV_039990	conserved hypothetical protein	+	MGASCCKNALHQTKPPVPPPDLPPPDPGAPWPGDTFRRAPAETAPVEPDAALPSTDFPSAVPWCSSSVSGAKRPSSPLTTYESCLGEEELSVVSPATRVAAPNAEGVRADAGGTDSNASAFTDSGTSKSCKSLSRDRRVGPFSGGERRAFPSSFGRGRGSDATHMRRESSDKETEPVEPTTSAAALNFEDHHLVSYPPPGFPSTARQTVRKPESQPREAGEAEGSRALPRSGSIFTRFRQSLNRRRDAGLGSASPPSGDRRRGLGDAVKKFKQKGGKKSALLKKTSSSGSTEIGGEGIRRRSTRATGGDAGPGNRSHQRHPAGFVSPDSEMTTTAGSPVSNRGDDEKR
TGGT1_261780	N. caninum Liverpool	NCLIV_025710	unspecified product	+	MGASESRDACELGGTAFCGTLPNSAGCISLAREFYCTCKPGFRAEGRMTHSSCTDIDECATGVAFCFNKIQNSDCVNTPGSFECKCNEYRTLNDNVCEDINECLENRGGCAEHSDCINNDGKPVTCRCLPGYTGNDGKPGRACKDINECEEPDRCPENSVCINTPGSYRCECTTGFAKDANGKCTGKEFCATGEHNCDPVFATCTTAVGSYSCACKEGFQGSGRKGECKPLPGSEHKACELLGLRCGRYQGCLPDNAGSYRCAALSKAQQVKVLLTEGAGMDTPIWLWCCVAVAIAMLIGAAVYGVRYFLKGRRNAYGSEDDAIMTGYGYDYGAADSFSG
TGGT1_220320	N. caninum Liverpool	NCLIV_012440	conserved hypothetical protein	+	MGASESTDSLRADHEARELRELNGQNYQDAEYPWFFLVQWACERIPADAVFTWNLSDIKADVAELTADPSTFLACCPADEAFRNSGEFSFTEDGVFVEWAVLLLELVPALGSVRYKLVPAKLAEEEFWCRYFSAVRRRIQQHVLAAQEAPIATPLSKSSLGRRGVAPRPLPLPHAEANCGVGRSSLANGASRPVSREASWGEAGPHRRRPSAHADTDLGPSTGASRGAPAADGVAPQQGDLGPHWGTTNSPYSPGDQRGAERDGGALPTAGPAVEWDSAAENPRFPTLIGAPSDAAASGVRTPHYVMQNGGAGCGVPTYP
TGGT1_232280	N. caninum Liverpool	NCLIV_032270	conserved hypothetical protein	+	MGAVCGRPKKGVASKDPQAANDSQTAVQKQQTAVGANAGAGTAEAGAKVSPHPAVAAQSSLPVTRNAARIDEFKPGDGDGVYLLEATEGHVSLVSQYAHDKPTDQGIVLLQVKAPPYRPIPESRFVLQSGKRILRQNIDMMKDTTEAKTKYCEVVMEFIRLAATYNGFLWASTHLGEIKQPFSIFYLESRQKAAPEPEAPVAEIKNTLPIGKDALEKKKAATGENDTKKEGEQNESGENDTKKEGEQGAPGNAPAAESEQAPKTKNEIVVKFLGPECSVSHRLLATCGILPLSLDKAKELIPEDKQVNNVDEIKTIVTEAGGFFVSPAAA
TGGT1_237820;TGGT1_260820	N. caninum Liverpool	NCLIV_026340	hypothetical protein	+	MGAVSSCCAVEESEDRQVMQKEQVAKTSKGERSRDEKKKGEKVGKKSPSHRSGSASAAPQVTAADIEELNQRLLSGMAVLVLLQDGTRLQCILHYNETDNSLSISCEDKVRVIPLSDVKALLHTRDQLQRVETKANLTDDDSCVALHLLESGNCIPLRFDSVREKTCFVELLKKLKA
TGGT1_232340;TGGT1_267100	N. caninum Liverpool	NCLIV_032320	hypothetical protein	+	MGAYLAKPKTQKVSEDGGEEGRTITSFGAASMQGWRQTMEDAHIATPSLRTGAPPSTAKTLEELTAQSGTAEKTRNVPAFAQDMSLYAVFDGHASNAVSCWVSDHFTKVFLDRLEQIEADARKGVSPAGLAESLSRELPDDSIFSLRNAVLCEALQQSFLDVDEQMKREENRQELKKYFEQGQIEQRDNETYIQRYLNDGGDVRLVEMDGQKYLQFVPRTSDEEDGEGASAVEEGEEKEKEEKKEEKKEEVEEASSPASPVNGEAEKNERTGAEGEVVNKLTRLNSTKLGDEETEEKDKKTEGEEEKDADKEEDDEDKAGDRPLFAHPSTPEGSGATAVVVLVVGGEDPVIITANAGDSRGVICRGGKAFPLSHDHKPTNPDEKKRIVAAGGYVANGRV…
TGGT1_232340;TGGT1_267100	N. caninum Liverpool	NCLIV_038980	hypothetical protein	+	MGAYLSAADSSKETTSGVCTSMNLRWSTCSMQGWRVSMEDSHLVLYAKTFPRLTQTSLPSSEKTQIDLGATSSAGANPLDLGEGPGDASPVRASSRASQASHPRSASAEAPGGASVSAVSPAPWPSGSSALSVGPDEEIYFQWGETSMVKRLSRSQRRAGGTVGGIPVGAVGGLAPESDAVEGEEKLESALGKGDEEKPKSASLRGGLSARRAFRRRRRSSAGAPEEKANEDEDETPEDVESGDVKLALFAVFDGHGGAHVARFAAEHLPQALLAQEGFRKGHYGAALRGAYLDVDDDLRETASQEELHFLAHHPTAHMLRLEQNALVVGSGAPPSSVLASSSSRRFTRLSGSGYVARALSLGGLAADDKDESGAGAASGLPTAETSAGPGGSEGPVAT…
TGGT1_226700	N. caninum Liverpool	NCLIV_046300	putative nuclease	+	MGCTESKAKEPTHKAEHRTRRESQVQEKKVPAPFCLPFSSDDFYTGEKLLSTEGDIGDAVLDYQLCIVGRCVNVSDGDSIRIRHIPNGHLLYPLRLPRKPGEARTPAREPGDEEDPSKTWKGKLTENTIRIRLYGIDAPETAKFGHPGQPFAQEAKQFVTERLLHKVVYVKCLSKDQYGRLLARVLIPRPDGLGHALFRGISDAGKGEGVLRGKTGEENFQDLDRERFIVCLMLVMFCRPVKPPKQNRRESIQGAPSWWCDDVCEELLMEGLACLYRGRGADYCDQRHLLAHLESEAKEKKIGLWGAPEGELQLPGDYKKSNRAGLLPPQDESDACGERRGSHSKRRKSRSRSPSPAARRSEAECLMHAARDGEATSNHAEDGGDGERCAHSTKGGRRK…
TGGT1_313290	N. caninum Liverpool	NCLIV_056590	putative phosphatidylinositol-4-phosphate 5-kinase	+	MGCTQSTANETAPKPAQHQGGAVSPGTAGTGGVSRNGNSDRAGGPSGSGPNGPSVENGGAPESAEPPPENLAPDDDTVGTGYVPPPGGRQGHSLASGPPTNLAEIPGEPAGGGRVARPAVTLKSGAVYEGQWKDPHRDGQGKLSWPDGETYEGSFKKDECSGEGTWSDGKGNVFEGQWQHNRINGTGKFTHADGSVYEGQWTDDMKHGKGKEMWGDGTVYEGSFEKGDKQGKGSITFPDGSKYVGSFAKDFFAGKGVYTWANGRTYEGEWKDGYMHGNGVYKWPQGQFSKYEGPYEQSMKSGPGKLFLRDGRIYVANFVKNKMDGEVVEISPSGKKRKGIWKEGKHVKWTEQGKVPLFVGEEALDNSAGDYETSAYSNPNKYHQLYQGQKKQHMKIDGG…
TGGT1_207460B	N. caninum Liverpool	NCLIV_002540	putative GTP-binding protein	+	MGCTTSSSAASAGESQLRMANAGSLDDGFSERLNLEAKIVLLGDSGVGKSSLALRFCRGRFPQYHEVTIGAAFLQQTVKVANDGSQLKLYIWDTGGQERFRAMAPLYYRDAAGAVVVYDVTNLSSMDAVRFWVEELKQRGPQNCRIAVAANKSDSIEPQTDSELATPPEGETKAVDAEAERRAEMKKYCAAEGMLFVECSAKTGYNVGLLFEQLAKEVFEQLKQSMMDL
TGGT1_209450	N. caninum Liverpool	NCLIV_003750	putative TLD domain-containing protein	+	MGDSSSKFSHASPAVSYQRLSQQEVQELLSSFGLNEFSPAKARISLHSFLRIFPPVLHPTASVLLPVLRDLVRLQQLQGRGYSSSGFLNKADSNGQLAPPKVAAQGGSRSGGLKTLGTLACSGKGARKGEETCCGGTHITLQEMVDAVSACAYGDREELQVHMLQRLLSRMSKVLEEQCKRLRQQQSGAAGSRHHPERGPVPGSFEKPTDLPFFTLRVTSHSHHLGAGLFSLHHGGTSASTGSLTSETTQTASVASVHGAPGAPQPSSPGPSGVSSAPVSGVEAVLHQIFISAYLLFLAIISPSNPIFSSADPFALSHPAAGASSPPAGSGDHSSGLQSSAGEHAACGSASPRGHRRASGVGSPGVPSDSDADHHASHGQSRPSVSGAGMAGWDTTASS…
TGGT1_233030	N. caninum Liverpool	NCLIV_032850	hypothetical protein	+	MGGACTKNRARLPKRRTAQELADKQRREQEALAEEERQKMKEVAEQRRQTEIDREEDSRLQDEEETALARQQQEEAEKKKQEEGRRVAEEEAKQEAERKQAEEAERKQAEEAERKQAEEAERKQAEEAERKQAEEAERKRAEEAERKRAEEAERKQAEEVEKRRREQEQEVRRRLEEGASAARRAEEEAARRQKEETERRRREEEEEAEHRRKLLEDDSDEYASDSLDDSQEYEQTDSAASSPATVSSRASRPVTGATPQRRSRKSHGANMKVVHKTARIVSHHCGCELEPQHDDLTCPVCEFTDMGDVPLLR
TGGT1_267440	N. caninum Liverpool	NCLIV_038740	hypothetical protein	+	MGGGASRDRQELSTRFSYGPQQVVFIPSSQNPNSGGRPGTPNMPLSQPPDPRFGGPQNEVPAPAGPEAVPRLNVQQTCVVKNPVNLHKHSLKCFQDPAYPDRLFFSFLLDSTTEVDVSVHYYAQQLTDAVTGAPSFVSRLSCPASESSRRFPAAMSQHFCTTPEEALLLSDWQQQANLESEDEDEDVYPITVCLRSVPPAQSGPTQQPSMVKNQYTFARILRVPRGGGGGPATDASSGSDPAAGDVSVSSGAGNVSNSPGHEWRAQIVKQKIQFGTRTFEVQEIFGIERGNSTEMQRLQSEARSSHAAGSSGEDADSKHFGDGHADNLAGRECVICLAEERNTAVLPCRHMCLCSGCANIMRMQSNKCPICRQPVTSLLQITMKTNPE
TGGT1_203160	N. caninum Liverpool	NCLIV_021780	conserved hypothetical protein	+	MGGTVSTEENKQWALEKVLFFDPETRPDPDEVLQGRGGAGCVRRFTPSNAKLCNRNFLIRFIIDGKGREFILKLQNQPYCRLLLCDKAGEPIKEIRTTRVKYIQRQDMTVEVYVKTERNEMSSLSFEFENAKECDLFAEFFKMLFGIQVHHFGFRDMGSGLADLMENDAAGSDSNYSGSDEDEYEQRQKAQAKQRRQRKQALQRRTGCPLHGDQPCACAVERPSITQYDDESSSSEEEIHASWSNRFPVSIEGVCEAGSTVKMKDLAARLVNKAPARVVEWFFSHEAGKDPSFPTVPEKTGLSIRLEERYVGYSVQIRVARRMEGSTLANQFVYSVAVKGPITVSSVTARSMLEFLAEGIAFRANVREFSEPLEKAVPWECFYVTRPEPDELDYREDDI…
TGGT1_293470	N. caninum Liverpool	NCLIV_000430	conserved hypothetical protein	+	MGGVCSKSTADSSKGRNSESKATEAERAVAVAEGLQTAQKIEAVTGAPAAVTEDGDVIVAVDEEDKKSIKGEKTNIVDEAAAAVVSRSPEPAAVIRKEEVVTEEGKNGDTRVHVSVVEAVISSDLADLPEQVEHVSPRDLELLRQAREQVKATGGPVITDVTNSDGQNRREYKPRASAYGYLLYVPDKGGSLILLWLKQELSPEEEEKAGKILVSFVPALHKSVPRMKYEQKGGKTELLTGIEDKWSVWKANEKQKYYAAWATVLKTCDEYEATLCVRNWTEDMPPQVFLSLLHVGPVGNKVATLPRDRPVDLSVFSHVAVVPADKSKEFKEGHDLSEKKFQDLIAAAGGAHQRLVPRGNAAKLGQNDVVAWFKEDGIDISDNKQGLILDGKK
TGGT1_261500	N. caninum Liverpool	NCLIV_025990	conserved hypothetical protein	+	MGIGSSNLGDAILFPAPAASYDAQLPGLLWIEEDFPPLAPRGSLSPEEAAELEAVHRHSRAHQRLFPAFFISAPGGESQCTILYWHGNSCDLGQIYEELDVLSKFLNAHVLAIEFPGYGLAPPLNGPGPEDLAAAAIGAEGSSADEAAVRRTASGLSKNKMGDLINKWSRSAFNFLAWLGVTPSNVLCFGRSIGTGPASYLAAALAEQNIHVGGVVLHAPYITVHKIVQEYASLGTWLISNHWSNAANLEKMAVASCPLLIVHGLDDEVIPTSHGRRLFETYQSEKKEGFFPADSSHNRYYIIDDLGKPMEAFLRDKSLVTGAPAVRVEIPAYVRAPPQWQLQSQRAGVAPLVCEADSASFVADAAISALPSSPASPEAAEAREALAEFASPAREAALQ…
TGGT1_269990	N. caninum Liverpool	NCLIV_036600	conserved hypothetical protein	+	MGKQCSKELSVHARSSGKGGNVWLGPEGCEERASVSFRSASGAAEAPEDGKASPAAGASSSGRGTSPSVFSAAHGRKSSINRLLKTLTLRPGLTAGAASETTGQGPRLSLGTGRDGASPQKALAGATGPTGGDGALGAPGAEKSRPESPLAAGAAPSDAVVVARTESFQQPPHFLEMKEVEELSKTFTFYVEIFGIKCRNVSLSSKAFQHVSSRLFCTVNWADSAFYETTEAVAGVANPKWVSKYHFSWSIPQLSRLHEQTLELSVYEEDGLPTGAASPQAQPRRVLLGSASVDLLTVATGPVHHDLLLSNPEKGKADCGRVMIDVRMAQICPLIINPIEILVNLHEPTAAGQAIIEEDVSDEEDEGPHEEASRGSGAASPLAPPLRPISANPPPQSPE…
TGGT1_247690	N. caninum Liverpool	NCLIV_063910	hypothetical protein	+	MGLGGSKAPPLEEWVVKVGETQEMKTATNAVVTSKYTAWNFVVKNLWEQFHKVSNMYFAVICCLQMIPQISTTNGVPTLALPLSIVLVVNAAKDAFEDWQRHRSDRIENGQVTHCIAKPSDRSEAAKRLRDATQVAQETREKNQSPEMPPAEVVDAESSSATQLGLTPAQCRALGICPKLWKDVQVGDIVLCLKNECFPADMVLLATSDTRGGAFVETASLDGETNLKLKQTHRTTFEWLGSCLPLSVCYLLTRRGRLRCQVPNRDLNAYEGVLELDAAMCDLGETTGDTLAPHDRGLEFAGRVNGHMIVTWPQADAAFSIQQLLLRGCKLRNTEWVLGLVVYTGVETKIQMNSSSPPRKSSRVERLTNKLTLSIWLIQTLLCLGVSIGHTVLMFDSTA…
TGGT1_276140	N. caninum Liverpool	NCLIV_007000	adp-ribosylation factor 4, related	+	MGLSVSRLWSRLFGKREMRILMVGLDAAGKTTILYKLKLGEVVTTIPTIGFNVETVEYKNISFTVWDVGGQDKIRPLWRHYFSNTHGLIFVIDSNDRDRIEDAREELHRMLNEDELRDAVLLIFANKQDLPNAMTAAEVTDKLHLHSIRHRNWFIQSTCATTGDGLYEGLDWLSRTLAQKNID
TGGT1_242070	N. caninum Liverpool	NCLIV_017370	putative CAMP-dependent protein kinase regulatory subunit	+	MGNACECQKADTVQEESPAAPVLTKVTKGKGTTGSSSSGQKTSGTKAASSNSSTVVPQLTEDDLDTEDEKDDDVVEDMPQPSEAYMSRAKNRQSVSAEAYGEWNKRKKFVAPVYPKTAEQKERITKVIESSFLFSSLDIEDLEIVINAFQEVSVKKGTVIIRQGDDGDRLYLIETGEVDVMKKFPGEKENKFLCKMRPGDAFGELALMYNAPRAATVIAADDMLLWALDRDSFTNIVRDAAAKKREVFEESLKEVRILEDMDPYERSKLSDALRTATYEDGDVIIKEGETGDTFYILLEGTAEAIKNDKVVMEYKKGGFFGELALLKDQPRAATVVAKSHVQVAYMDRKSFKRLLGPVEQILMRNQDNYRKAMEQLGLDTKYLDK
TGGT1_223940	N. caninum Liverpool	NCLIV_048570	conserved hypothetical protein	+	MGNACKKNAAKTPTRKEAEDLAEKERQEREAKEKAEAEEKARREAERKAAEQAEAERRENEAREREEQARKEAEAEAARKQAAEAEAAEAQRRQNEAQEAKEAEEAKRKEEERLAAERAAAEEAERQAREEEERRQAEAAAAAERERQMQEALKQEEMSPREKYDKLASPEDSASETTMATQPQKVAEHSSAAATDRSVMGHTITPCDMGAIDETAKYVSKRCGCDLGDQHDENACPICRQIDLSDAPLLN
TGGT1_235490	N. caninum Liverpool	NCLIV_049920	conserved hypothetical protein	+	MGNADSKTRGDFQLFNLLQIANKGDADDNTEDGTQATQHPRRLRAFLEANLTAQELEAGLGSREEILHTARQYPDAVAKLLTQLVDVCTATADAVSQQPATLRDSSTLLTTVRLLSRMVPVLLEDPSLEQRIFWFAHFTPLSPGGNSDTRSRCPSPAGDTQLTGEAIEAPKDAARAPSDLAAHAEREEDSEGEDRAAEKREHGERDAEGDRKDERKETVSPASTASQTSSTGLPVLLGNEIVNLLFRLLFLRGFTAIVPGAPLSQEALRALPKHKVDLRFLWKGGVGAAPDFAIRPSGWISNNRTEVMNCLTACFSGPLYNAVDEYQLRVPTWIRVATAGNAPYTANLFCSLLSVVCSTDTTHRGVFGIFGNAETQAMVAASLQLLIVLLDFNVGVFVL…
TGGT1_310930	N. caninum Liverpool	NCLIV_054940	conserved hypothetical protein	+	MGNAESTASDLHDNYLAVLKSVENRLGQFPNRSLSFHSQPESNGRSRVRTNTEEACQELGKRDAANRPRKLSSKGEKPSRSVQQSGLNSSVDHSSASADAKKRGKERAHRRRDAAQSDEDGNSSHPSDGKRRTAKGEPPNLESTATGSDWEDAAVNDFAEEDDCAVASPAHFKLQTKDSGVKAPSPRLFPCETLSDGPSQRDLEDDEKTEVDGSLGSSPGSPTASAGSVTGATGGRSSDARKERAEGKGKDPVNTSDKSKRDPRQRSNGSVASSGTSGACLHTGQPHAARKSSPPSKQSRQKEQVTQLSAADIALPSHASGGCTQEGKEKGWADGDLAEFAGDFEGFSPHSPSYSFGLTKLPKKAIAKSGKTEERPPSAGTSARGSGNKASADADACIY…
TGGT1_262490	N. caninum Liverpool	NCLIV_025340	hypothetical protein	+	MGNALKRMVFQPPSQPTYECDSRFIWLTTRRRQRIPAFFIDIGANLTVIFSHGNAEDIGMVIEYFKEVACLWNCNFFVYDYVGYGHSSGKPSEQGVYDSIEAAFDYLTQQLGMPAASIVAYGRSLGTGASCHLACKHKLAGMILQSGLTSIHRVGLNTRFSLPGDMFCNIDKIGKVECPVFIIHGTKDEIVPVHHGMELYNRCPVSVTPYWVEGGGHNNLELLGRRAFYENVARFLKFIRARSTQLELRSPNTLCSSASLSAR
TGGT1_267080	N. caninum Liverpool	NCLIV_039000	probable 26S protease regulatory subunit 6B	+	MGNAQPRGGGFPGGSEEDKEKKKERKRLEAAPPTHVGKRKKRGKGPVGHSKLPTVTPITKCRLRLLRLERIKDYLLLEEEYITNQEQRKPAEEKNEEDVNRVDELRGSPLSVGNLEEIIDEQHAIVSSSIGPEYYVNILSFVDKDILEPGCSVLLHNKTSSIVGILNDEVDPLISVMKVEKAPLETYADIGGLEKQIQEVKEAVEFPLTHPEFFDDIGISPPKGVILYGPPGTGKTLLAKAVANETSATFLRVVGSELIQKYLGDGPKLVREMFKLAHEHAPSIVFIDEIDAVGTKRYDATSGGEKEIQRTMLELLNQLDGFESKGDVKVIMATNRIESLDPALIRPGRIDRKIQLPNPDTKTKRKIFQIHTAKMTMADDVDLEEFVMAKDELSGADIK…
TGGT1_245710	N. caninum Liverpool	NCLIV_062960	putative MORN repeat protein	+	MGNCACPRSLTGDTSDEVIFGQDGKGQGFVGKDLEARQKREVTFENGAVYNGEWTGDVRDGYGVQIWDDGARYEGQWVNDKAQGKGKFIHVDGDVYFGDWFEDKAHGYGVYNHADGSKYEGQWYEDKQHGKGTEQWPDGAKYEGQYSNGKKHGKGTFSWADGSVYEGDFVNNDIHGYGVYRWADGRRYEGEWEKNRMHGQGKFQWADGRIYQGDYRHDQKDGKGTFSWPDGRKYIGSWRNGKQHGRGTYITSKNEQRNGEWEDGRRIKWIKDDE
TGGT1_310420	N. caninum Liverpool	NCLIV_054500	hypothetical protein	+	MGNCLSGGSQPSRENGSPASPAKPATPAEPAAAPSVQKAESAVEQKKEETTEKPAEEASASAATEPAAAEAAEAPAATTEAAGGENAEEAKPSEPAAEPAKLDVAISGPPPLKAPPPRPQATLQSKKSETAVQA
TGGT1_212210	N. caninum Liverpool	NCLIV_049160	conserved hypothetical protein	+	MGNEQSTEGQVQTPDQVPNADAGHNEVAEQVVSAQEPGEGPKASSSKDPPPVPLQATDHGFSRYLSGLGDFFSGDSSGAVSASSEVVNNIGSYMSLEAVKEALTGEEDRAEGGSSSAKEEPSQEPPADDVKEEEDKEQQTSASGITSYLTTSLDGVSGLFRSMTQEGTVLAAEASAAAQDTGASLQSYLTVSLEGVTALFKSGSSENNEVPPSVQDTGETVPLPSADAGVSATEETSGVSATEETSGVSATEETSGVSAAEETSGVSATEETSGVSATEETSGTSNAE
TGGT1_219710	N. caninum Liverpool	NCLIV_060900	conserved hypothetical protein	+	MGNEVASHHGAPASPSHAFKARDRSGDGTNDRQRHPEGDFSPEAKTLGGFRQLLARRNPPSCAARPSSLCAELPAAAAVLNGQYPFLLFASAEHLIPLEAAVASSSLPSVSSDSSCASSPSVSVAARERRENEENPLLSLLSFDETSAFPRSGAALDVSTYDVALLRDAVTPATDGRRGRERGDSLLAWPPQFPAFLPPGRAIDTNQIFVAYGVKGGVRVMPIVGSAEGGVEETYKAPLYVPPSANANASKPSAVSVALYQGTKPQFLLVADSNNLVSIFKLAPPVSSQKAGCSGGASAFLLLQLPNPQPLAPLSPRHHPLSSSTFVAWIPPHAGGPQDGAQAGREQSYGLSLSHAGDVYFVTVQRHQVVLWSLPVLRSYCISKNINFAEQPLQVDDAV…
TGGT1_306660	N. caninum Liverpool	NCLIV_044830	putative RNA pseudouridine synthase domain containing protein	+	MGNGVSAPPGGAGLDGPASAPHGSPFVSSSAVLSSASGRRSSRLRTASHPPSRRSSRSSSAFGRSPECTHSGTTLIPEAAFYALTEKNLEAISCLPPGSDMVYGVLWPGAASCAGENGGPASLLVGSALRKGRQDHLSGDASLPMADRAAGGEGCLVSGFPAATFSREAISTYLARSARGYLLEAMRQGGDPRSLSDDETCTLHSGGTGGSGSSLVTGSPAIGAAEGTKNSAVRLSDHLFLLPASSGGAHAVNTTLSPAQAVLPLSPACLGCPAVHPTAGGATGAPEPGQIVARLAGCVHEPLVSGGLTGTAQLGEAVPWGVASVKVAETGDPQPCAEAGDSQKGRAFSELEQEGGETRGRHIGTASTPPPQPHPFAWPSGGTGSLRGGRGSSTRSSRG…
TGGT1_255245	N. caninum Liverpool	NCLIV_028700	hypothetical protein	+	MGNLLSSLLPARVHKRLSRLWTNSYWLVSTAAWVVSTAAITLAAPVIFHYEKECQMFETQAQFYQQQQALLASGVAGASGSAPGAAPL
TGGT1_285190	N. caninum Liverpool	NCLIV_015000	Os05g0488800 protein, related	+	MGNNNSRGGGRPGHAPGGASGASNFVSSHRLASPASSATNPHSNATPSESPIRGHCYACDARGPATLDSASGDLRCDSCGAVGFVERLADGSVSGSSAPPSSSSGVPSGPTVSVATAPAAVVENAFGIPVADLMAQLIGGLAELQSDDPGMFFYGDGEFEHAAGGRPSSTRSSRQGGSLCPRVVFGSEQERQQQEDARRMMQAVFGTTDGPRAFGGGVSDNGAAQNAVAGQAPFIQIGNLVMQVLNQALSGGAGFGVGEEAMDQILTMIMQNDVNRYGSPPAAASVIRSLREETLTEEQAREAGPCAICQEDYRREDVVHRLTDDSSQCSHIFHRQCIIPWLEQHNSCPVCRFELPTDDAAYNQRRAELRNRVRSTLSSVAAAATNPSSSSPAPGPTEP…
TGGT1_222960	N. caninum Liverpool	NCLIV_005990	deha2d02640p, related	+	MGNPLLKLYSVDKENAVDGGRFLRWTQEAQLLQRLRHPQLLHLVEPLQEDKNSLVFCTRLVETTLREQLYEQCRPHSGSGVSGSPPDSSAYSGQEGEKRARSSRCNFVPLSLLEIKSGLLDLGEALRFLHADAQLIHLNVNPDSVFFTPKGQWRLGGLGFAQEIPGDGGAGKLVDCGFSFGAPSGSAQAQVSVVPPLYYSAPELAASHPGKCCRASDVYSLGLLMAEVLLGPSAGSGCEARLLKTNEWDISAHQAQCHRLLPLRPNMFASSPYFSMPSAATSLPTLTALLSSMLNPDPSQRPSIEQFLQSPFFQDMNMRALRFLEALHEKDENQKIQFLNGFLPLLQQQEEFHHSNLLRNRVIGPLLDALAFPALYPFVLPNLFFVIKQLNDRAYFQSD…
TGGT1_261440	N. caninum Liverpool	NCLIV_0260	armadillo/beta-catenin-like repeat-containing protein	+	MGNQCCAGRDNAYKRKAQENEYANRGSFRHMLSFGAVGDDVVRFDRAYDNNDIAEFVRLCSSTCEIEKLEERMHPWAADPETIGALAATQLAIFSSREQEPHMKDEIREAGGIEALVKLLASKELDRKHAAVVALSFLSVDNVENCIAMYNAGALPYLIQGMKGDIEGMRAACAQTARNIYVLDVKYRREFMKNGGVTQLVRFLDINPEATNVYTQLEAIYHLEDLIGDENDEIPEFVQAVKAAGAIPKLKKLQDCKDQDVADAANLLLVRLSE
TGGT1_240630	N. caninum Liverpool	NCLIV_016830	putative ULK kinase	+	MGNQQAGCSGLRGREGDTERKGLHGFDGKYHPLRVLGSGQFSTVYECVRVDNPRERYAMKVMSCWTWDSRTLRRIEEEISIMQELGQSHTCLCHGLAFLHERGIIHRDIKPENILIAKDDGSTLDIKISDFGLAKKIFVWLRRLLLFGDDHVVPADNRAEAKYSPVVTGVNGVSGSLEISSGLASSSARKASELAGSLQ
TGGT1_232815	N. caninum Liverpool	NCLIV_032750	putative erv1 / Alr family domain-containing protein	+	MGNSAGAYALRNEHVSSAVSTNREISVDDNADRRPGRIHASSLVSPAAGGGNNGSNASSLDPIAVPRVGVENEGVGAVNSASSASRETLSPSGGDAQAQGVSTAPSGAPPQGTQILDPSAETCAVREKATQTLPPMHPPIHFCAETNDPQDPCNAQWLLLWTYAAYASPRPNAEEQRHLRVFFEEFPDQCTFGPAARCYSEAVKTFAPRVESRRDLLLWLCLVENQCRLKLDVPARPCRYSELVRRWRYEDGYL
TGGT1_316540	N. caninum Liverpool	NCLIV_059000	conserved hypothetical protein	+	MGNTACCSFDSDATADLEIGREGEMRSRKPVQVSKEAFDNWLNRYEAGDTMEVLFPDGHRIECNLKIDRPKNYMNLTFNQKVRPIQLDDIAAVLYGSDPRSSECADSKMLRNPRVVGFRLASSGRAIAFSFKDVTDAQCFVSFLDDEIKKNQESHKSSASNAKN
TGGT1_237820;TGGT1_260820	N. caninum Liverpool	NCLIV_012195	unspecified product	+	MGNTCKSCCGEAADSQLEIETPENGSKAASPPEDLPKRYSPEFLERLHKGLTIGLILQDKSRLDCMVKLTEGNSAIELSCERKSRVVKLSGIRNILYTAEQLRRVDCSAGISKNDFCVALHLVTSGNCIPLFFSNPEDRDCFVLVLQELRNSSAPPSGPPS
TGGT1_249970	N. caninum Liverpool	NCLIV_066080	conserved hypothetical protein	+	MGNTMSCFDRWGKRAPDGPLLQIKSSESGGSSGIIQAASTASTAVGSTTTAPAATGGATSPGPAAPVPERPMRRRQTYSLKAKKSDTEMSSMEELSEESESDADNDAVSASDIRMKKVMQYRRALTKVVKLKTHLFSETVKVTCSKDGEQVQWFKGKTAAGAQDRKKPSGSFPVDKITSVKSQADNTKVLVITVNNPQPSTYNFTFKTPVERESWQEQIQSLMKFMAMK
TGGT1_299970	N. caninum Liverpool	NCLIV_060440	Alr1799 protein, related	+	MGNTVQSPRGRHYGYSSMPSGPRLDSPLHMNARCGGGCPYPALSSESRYSMMCCQSNGRKMEQFKTREEALATARFYRDRNFDLALHAYSAALDFPSASATPHSAPGRRRVEIIQLSDDLRGPRATDEACEKNSCGDYQRDASLAKAEICSASTALSVGGSNSRLQSEELEGPFEEKGESSAGRAASLPAGVSLIVPLEPREDAPPRLGAGRFFQSSSSSLALECAAAAGAENEADLSNAKICDEIAQLYLSRGDKEDALRYYNRAVNLAPSVVVFIYRRGVVLQLLGQEEAAVLAFRRALQVDPDYKAALFNLGTCLMRREEGREEALCIFQKLAALEPADDQVLSLVAHCYEMDSRFEEALAYRQRVVQLDPQNFRANRELKQLKQQISKENGHFGA…
TGGT1_211630	N. caninum Liverpool	NCLIV_011450	conserved hypothetical protein	+	MGNVCRGEGKTREPRTPPKLERSESTEAEQKALRKQASTRRIETAKHEALKKLHTSRALSVHEERRRLHIQATRQKLVYTSFGGLNADLRDEELSEGEDRPPGPRRPSHPRQEGLDSSKPLEQRSESGQKAIFGCTTREKNMAVLGESQASPSDNIFEVTEPTAPEAGAAERAAQEALTQKLAELNREQR
TGGT1_264990	N. caninum Liverpool	NCLIV_040240	conserved hypothetical protein	+	MGNVMDHFNAERFDPRYGVITTPDGKKRAMKPEDCQPRYYERTYREGDPELPEDPEFPARLLKAAQDHDWQIENGADGVSIMYPGKRQPKLWVGHVRVVNPEDRICPENGNANMSLDDLIHHGLITPVYKTTGAAAVPAEGKHGNSGEGMNQAQQMPLSSSRQQSAENKRLAEQHLRMSVNERMKLYSGTAQPQPDRNETAASAHFPRANPFMPSGVTQPFPSMFGAPATPFPMNPTAFPQPQTCGVPPSVNQPPSAVATGVYPPLLPIY
TGGT1_271380	N. caninum Liverpool	NCLIV_035510	conserved hypothetical protein	+	MGQACTRQQVLGPSRRGDVAEAAASPETDSVCDATQGASPGARQGQARSQSGPCRASEREEARRFASSPGGAPSRLLEGEKCMYTRKKWKPASPSLVYCLINNLADRHLAVVFDCREREKYEANHLHYAVCPWRNAQDVAAVLEYFEKHGAPLVANADILKKPKGLSPPASKSAAANPAARSPRFVFPAFLSRTQTLTSSANGAAAEKRQAGKGAGDKTPPSPLVFTPEGGASESTAPSLVVVGMTSGQLDREEARKAEEANEARSGGDAQTEMGGEKSAATPEETIEEGHKLEAETLKPDRATVAAAAMKRARSARSATLQEGPGTLVPASQFPQQTDEEDEQKAEEETEPRAAEATPEGDEPRRLVALKAWLRTVCKFRTVIMYGEGDDDALLLMFL…
TGGT1_320760	N. caninum Liverpool	NCLIV_009520	conserved hypothetical protein	+	MGQGSSKKQDGVGAHLREQAKLIKRVQEYLKKLDKLLAEWEKTHRRIGRATDSFFTAGTPYRESTVAIVQHMKIFEKARADLRPQIVAVGRTATELLKKAKNIEKLVDDRDQLSRKVTARNKKLTRLKSKNSECPDAKTQRDILKAEEKLSAAMNQYKMKEMQAQFETSNAMNTKYLDAATLVHRSVLIAVNFLRMTTPEMLKAEAYLGVVQDGTSLPSIDRTSSGQPLLLPLGGISSISPDPVQSQTRPVSPGNGFCPVLPTAPSSPVHVGPSICHGNEWGPIQSPVAQQEGAAGSNGVTNGHLAGTTSRDDVLGRSMDSSCNETLQRRVLTQKYTEGMVQIAEPRNPFDAE
TGGT1_313380	N. caninum Liverpool	NCLIV_056670	conserved hypothetical protein	+	MGQKLTVEERRNIKREVYMLYPGLEQQLEMAFTCHDLQHEGKLPYTTLEPIIRHLLMQYGLIEYVTRFSDSAGCLDANQVRAELNEFNVNTSGLCCGSSLTLEDFKSLAVIWLRKILDSHADDQAVWMSKLKAEQEEQAEAYTRAMREFQETFTQQHALYQQGLQEQQKQISDWNKLLEDAQKTQQHIYEQEMRRMEEARQKEASAAEEAMKEQMDLISQYKEKLEKIAAADKSGKCFVYPAAATPYGACASAGAQEPTRRRRVKKEHQSRACC
TGGT1_305860	N. caninum Liverpool	NCLIV_011980	calmodulin-like domain protein kinase isoenzyme gamma, related	+	MGQQESSLGAASSEPRLRGNAGAAGGAGDKLHATPGMFVQHSTAIFSDRYKGQRVLGKGSFGEVILCKDKITGQECAVKVISKRQVKQKTDKESLLREVQLLKQLDHPNIMKLYEFFEDKGYYYLVGEVYTGGELFDEIISRKRFSEVDAARIIRQVLSGITYMHKNKIVHRDLKPENLLLESKSKDANIRIIDFGLSTHFEASKKMKDKIGTAYYIAPEVLHGTYDEKCDVWSTGVILYILLSGCPPFNGANEYDILKKVEKGKYTFELPQWKKVSESAKDLIRKMLTYVPSMRISARDALDHEWIQTYTKEQISVDVPSLDNAILNIRQFQGTQKLAQAALLYMGSKLTSQDETKELTAIFHKMDKNGDGQLDRAELIEGYKELMKMKGQDASMLDA…
TGGT1_277870	N. caninum Liverpool	NCLIV_068130	conserved hypothetical protein	+	MGQSQSLDLPDTGIDNVQIRRRERDEMRTTRRKRPEAKRRPDAFMKHTEAPNHIRPIREIGREREKDEGGFEGTFEIADLVKKKKPIEDTEDYKVDVPLKELPVYERSESETSSSDEDRGQYHFEVSTLQKDEPLSVTDPEAHPVIVEGECAVGKELRVRDQSPLALDFPVFRVEWYLGAHIGDAQCFSVHHSREGSASLPFRVPEEAVGKYILAKAYRNVEDQLHETQLASTKAGVYDPHIGGPRHTDYLPPRGVTRVCSTAVSGPALISDACAYVLLKCLARGAFTCAVKLRDFHKHDSYGEAFVPLQGSRALGKSEKKLPATLFVDNAGLFQLRYRPADVLELTGEAASGLGILGLDLAGLLGSPFGDGEGSDRRGAGRRAQGVWGDEAESDGPAP…
TGGT1_262450	N. caninum Liverpool	NCLIV_025380	conserved hypothetical protein	+	MGSGSSRPGEAEGGNGLYGPRDATEQVEAFLFAVQRLASSHSSGEMETVNSEGEGVNDLACSDAGDPATANPKTCPCPSASAELLPCKEDMLQWDNLLLSLGECGVRPFSLSTPFLWNELLRPLLLGNPRNGQLKALYRFFARTLLRYAEAVECVHRRSSSSPASAPLRAQETAREGPFPEAASAKVPRSESLNAVAACEDPTSGETALPPRVVLFPCTDLSIAELALFLRILTKALCTRLSLPQLLYHLEYVPSSPGVSPLSPDLRDELLALSQTFFASLGSKRQRSSLTSLQPTHSSDAVQTAPPNSSQSKSRPEGSEEGKEEERNGGTVPEAVQRVASLESKQSGENVLSPSEERKSSGDSQSALSSFPSFPSSSPVVGVADPATTPTTTATVESR…
TGGT1_297150	N. caninum Liverpool	NCLIV_006250	putative MORN repeat-containing protein	+	MGSTFSSCRCLEIDRLADYATEFRPGRKEDSHPGEQLDQRAGDNASDSSRVIYEGEYKNGKRHGFGVLIRPCGSRFEGYFVDDAANGPGKFIHPSGDVYEGQWKDNQAHGTGTFTHSDGSSYEGQWVSDVQEGIGRERWMDGSSYEGNYKAGLKSGTGKFTWPDGSSYEGQFFQNDIHGEGTYVWTDGKSYSGKSTAPEKANEGARALETDAAARASRAAKNHVRQWFRNHMHGKGRMTFPDGRMHEGDYADDRKHGKGRLTWPDGRSFEGEWREGRQVPGVGVYRDGAGREIPNPAARPSGPGSHTNPGGSLTQGSPDVLSDSSKAGSSRVKGEAEERGRKKSLFSISHNHQRRRSAEASGSSTGGAWMRRRSDSRASCLSPRQGERGAVCEESGSSS…
TGGT1_262860	N. caninum Liverpool	NCLIV_0250	ADP-ribosylation factor domain-containing protein	+	MGSYFSALFSRLLGPKEVRILILGLDNAGKTTILYRLHLNEVVETIPTIGFNVETVRYKNIEFQVWDLGGQTSVRPYWRCYFPNTNGIIYVVDSADRERISDAKHELLLILQEEELRGVALAVAANKQDLPNAMSEGEVSAALGLPSLRDRPWAIMRTSAVKGEGLEQAMDWLTDVLSQS
TGGT1_240550	N. caninum Liverpool	NCLIV_016750	Cytochrome c oxidase copper chaperone, related	+	MGTLASTPASTTSAAVPDGTASSCSSRVNSAGKRICCVCQETKSARDECILLNGEERCRNFIEAHNQCLRSEGFDVQ
TGGT1_305860	N. caninum Liverpool	NCLIV_017560	Calcium-dependent protein kinase 2, related	-	MHNFPHCFCPPRSHQHAVPAESDGGPLLAQQDSGNRQRHGNFRYRDTNAAGCGRDSGGRGQGDGVGEHQGFANDPADQQTGAGVAPGGVVGPDGLPYVGGGGASPTNAGKFRREGFILSYNGPLTDYYDIETKKLGQGTYGSVCRAVNKATKNVRAVKTIPKAKVKNVKRFKQEIAIMKCLDHPNIIKLYETFEDHKNIYLVLELCKGGELFDRIIEEGYFSEMYAGTLMRQAFAALYYIHQHDFGLAARAGPTTVLATKAGTPYYVAPQVLQGKYTYKCDIWSAGVIMYILLCGYPPFHGDNDAEILAKVKSGKFSFNEQDWKNISVEAKDLIRKLLTYDPAQRLTAEQALAHPWIKHYATKANPAADSPLNSQILDNFRAFRAVSKLKKAALTVIAQ…
TGGT1_243800	N. caninum Liverpool	NCLIV_063970	putative long chain acyl-CoA synthetase	-	MKQPNPPVGGRLSPRQPWTGLYAVPVEGLPKKEGESAVYRCVESSQNAVPVKALPAVLEDFPDIRSPFDTLYCAAQAFPDDPLLGEREKLPLPEFSVSQVETNGPGASLSAKTHETRPVTASSASGNSPPVGGEKPGSSNRPLSADGEDGARLGTGGTTPVTPSKDSSTGLRSTPTAQSLGESLPRKAGCLRFGEYKWLTYKETLDQVQALAWALSHVVDVPVASFGDDSEVQETYRFVGIWARSSAAWRITDYACNAAKTVSVPLYDTLGHEALLYIMGLTKLQVLCVEGAKIQDALRLVTDEKVPLKAVICFDPVAPEEVEEFAGNSVRLYSLSDLIEKGLGQKHERPTLSVDDICTVIFTSALEKTLGKWKEMWPAKRRRGCVPEETPKRADLLRC…
TGGT1_305860	N. caninum Liverpool	NCLIV_047750	hypothetical protein	-	MLSGRTRDFPENGKEAGGLGDGNTKRGLDDFDADYGCRGGDCCDVSTKPHFFSLCTKCANEGKDKSQHDRREPVRGLIIRSESFMNASEASRWEIEAQCNSTCAGDGSDGASGTTAVDGLPASPRPDAPVFDRSKIVHEVLLKDGQQITDIYDTPNGTSLGKGSYGSVVKAKDLKTGIMRAIKVVYKPRIDNVTRLKREILIMKRLDHPNIIKLLEVYEDMKNLYLVMELCTGGELFERIIKSGHFSERYAASLMKQVFSAASYCHSQNVIHRDLKPENLLYADSSPLSALKVIDWGFAARCGKSHKFSSVVGTPYYVAPEVLFGKYGSECDMWSAGVILYILLCGYPPFHGKDNQEILKKVQVGEYSFDPRHWRRVSDHAKDLVKRCLTYVPGKRISA…
TGGT1_305860	N. caninum Liverpool	NCLIV_044270	hypothetical protein	-	MPEHSEVMGGRISRQRGGGQQAPDNRRPNPASMSTISSRQSVSASDRKAGVSRHHGSAQTQSSRLHAPTTSQRVSSPTSSEAGDQRSTVSGKTSSGRPRGPNLFSGSSKNKASPSTNSTSATASLSPQPYTPTPDAHKAGTGASPAAGTGRRCVPSPGAASAAGREEVSSRHVIRRPSESRVASTSPTPRDKEGGIDRSKFILENTGALTDFYEIDTATLGQGTYGSVSKARKKDTGQMRAVKTISKSQVKNLERFRQEIAIMKDLDHPNVIKLFETFEDHRNIYLVMELCTGGELFDRIISEGRLTEKQAAVLMKQMFSAVHYLHSNNIMHRDLKPENFLFLDSARDSPLKIIDFGLSCRFKKGEFVSTKAGTPYYVAPQVLQGKYDFRCDAWSLGVI…
TGGT1_242570	N. caninum Liverpool	NCLIV_017600	conserved hypothetical protein	-	MRAVWCVMKASCADRVEQKIEWLHRLEWLLVRLNPMESNHPTRHALLEARVLELCLGCLRDNQDDAGLCVSALAILVHMSLNDETSKKLASSHGLEDIAILLKKYYRRCQEREPAQPQAAQSGCPEQGETSDGSDPKGSSSPAGDSDATGASAKGLAPAQNTEVGAAGGPKEEREQASDDNKKSDSAGASMTENLQTDEGQLLAVELVTLVWRLIFATSLDGDEYAQKWIKAGAAEPAIDSVASDLDVFCSATYVCWVFGALRFLPLDNAELCEDFVRRRQLFQWTLKKMEMHHEEPLVLENGFAVLANYQRAQPAHAEILSKLPDVWTKCLSWLNTDKMMRVPDVVYQGLYTVGLACSYCPEACANLRDAKGIEFADKVVEAYGENMNSEVSSASSAW…
TGGT1_292120	N. caninum Liverpool	NCLIV_031010	Phosphatidylinositol-4-phosphate 5-kinase family protein, related	-	MRCCGSNQARRRSASAAGDSPPTEAVTKTALGLKQTLQGHIRLPVKMERAVLEDILTKTNLGPKEIKDLYNRFRRIAPDGSLPFSRFCDTLGVLGMVDETFLAERLFNAFDTNGDSTLSFTEFAVALGIMMRGSDDEKLDLSFKILNPTYGGGATCLADYGLGGFEGEDEACSEWDQASAASAPADQERRREASFRSDASGLPTSETLSLARYEALKPQIERDTIGVEDFVLLIHCVDQTRKALIGGSQPSYPDAEIRRVFLQNATQMPDGSSRMMLLDFKRAVRTSPAFLALLGVLPQELAVDTSAGHQCIPAAKKAVSSMRRLQSTAVLRMDSHKEGVEAVKQELRRVREELGRVVDFVNGIVSAVQLEQVTQDAIIAHAIQDDDAAHMIDDTAPKS…
TGGT1_243800	N. caninum Liverpool	NCLIV_018500	Fatty acyl-CoA synthetase 2, related	-	MRQQYTPDQSRNGCKAPVFRGAAFGRHPFPCPKHLKETNPDLPLGIQPQCNCGQLRRSAVSERLGFVSARRRSRSRGSVPGYASEEAGRDARPVPMENLSAGEKPRFTQKRRRVVSSYWSSFRDPVTHLRKDSSECVRRVERLALQVGSAVMSLPDAVPKLHFEEETFEKDMRFLAFYSRNREEWVICEQACNAYGITIVPLYDTLGPESTAYILTQTRLRSVVASEECASRLLESMEAAKTRAAEQTENDKATHTTAEDGEKKEEGKENKEGQEKDGQEKDGQEKEGKEGDKEPKAAEGGEREKAGGAQTVDAIFVKYLFLMDDPGAPAKDLLERAEKLGVQVFTWNQLLEMGKENPMPLTDDVVATLSTVSTVCYTSGTTSSPKGVLMSHGNFVATV…
TGGT1_309990	N. caninum Liverpool	NCLIV_054100	conserved hypothetical protein	-	MTQKYNSIFTLSVAAALLLSVLLGVLRLGIISYIFTMMVFVLQLSDAIFKLVTFILNWVEWGVALHDGTMSFQSAMVTSSISQVLTILLTFSMANVLYSAALVYKAGGNGCEYRNYKQIESANSASSSKKADTETATEV
TGGT1_305860	N. caninum Liverpool	NCLIV_070280	hypothetical protein	-	MYITQQKAHLSDRYQRVKKLGSGAYGEVLLCKDKLTGAERAIKIIKKSSVTTTSNSGALLDEVAVLKQLDHPNIMKLYEFFEDKRNYYLVMEVYRGGELFDEIILRQKFSEVDAAVIMKQVLSGTTYLHKHNIVHRDLKPENLLLESKSRDALIKIVDFGLSAHFEVGGKMKEPYYIAPEVLRKKYDEKCDVWSCGVILYILLCGYPPFGGQTDQEILKRVEKGKFSFDPPDWTQVSDEAKQLVKLMLTYEPSKRISAEEALNHPWIVKFSSQKHTDVGKHALTGALGNMKKFQCVYRDMEPPAMLFMGSKLTTLEETKELTQIFRQLDKNGDGQLDRRELIEGYRKLMQWKGDTVTDLDSSQIEAEVDHILQSVDFDKNGYIEYSEFVTVCMDKQLLL…
