# Supplementary material for: Profiling of myristoylation in Toxoplasma gondii reveals an N-myristoylated protein important for host cell penetration
Source: eLife. 2020 Jul 3;9:e57861. doi: 10.7554/eLife.57861 (PMC7373427; doi:10.7554/eLife.57861)
Supplement: Supplementary file 5. — MIC7 expression in tachyzoites and bradyzoites. [file elife-57861-supp5.xlsx]

## Sheet: Legend
Supplementary file 5: MIC7 expression in tachyzoites and bradyzoites
The data were analyzed with MaxQuant (version 1.5.0.25) and Perseus (version 1.5.2.8). In case of Toxoplasma, combined TG1, ME49 and VEG proteomes (release 37, ToxoDB) were used for data searching. Data were filtered to remove contaminants, protein IDs originating from reverse decoy sequences and only identified by site. Entries for MIC7 and MAG1 were extracted from a larger dataset (Young et al.…

## Sheet: Data
Protein IDs	Protein name	Log2 fold change Brady/Tachy	Reporter intensity Tachy1	Reporter intensity Tachy2	Reporter intensity Tachy3	Reporter intensity Brady1	Reporter intensity Brady2	Reporter intensity Brady3	Reporter intensity count Tachy1	Reporter intensity count Tachy2	Reporter intensity count Tachy3	Reporter intensity count Brady1	Reporter intensity count Brady2	Reporter intensity count Brady3	Total Intensity	Razor + unique peptides	Sequence coverage [%]	Mol. weight [kDa]
TGVEG_261780;TGME49_261780;TGGT1_261780	microneme protein MIC7	-0.516308	0.279364	0.326807	0.293451	-0.147665	-0.29464	-0.206997	4	4	4	4	4	4	7.64158	4	14.7	36.34
TGVEG_270240;TGME49_270240;TGGT1_270240	MAG1 protein	1.87724	4.25163	4.25339	4.27837	6.06266	6.22919	6.12324	114	114	114	114	114	114	9.71373	30	50.2	49.195
