# Supplementary material for: Profiling of myristoylation in Toxoplasma gondii reveals an N-myristoylated protein important for host cell penetration
Source: eLife. 2020 Jul 3;9:e57861. doi: 10.7554/eLife.57861 (PMC7373427; doi:10.7554/eLife.57861)
Supplement: Supplementary file 6. [file elife-57861-supp6.xlsx]

## Sheet: Sheet1
Primer number	Primer sequence
1	AGTGACACCGCGGTGGAGCTCGGGTCGGAGACTCATTG
2	CCAGTCGACGGCGTTCATGTGCAGCTAAG
3	ACATGAACGCCGTCGACTGGAACTACGG
4	AGGGAACAAAAGCTGGAGCTTCGAAGGCTGTAGTACTG
5	CTAATCCAGCGGATCCTGGTTGGTATGCACTTCCCCTCTGAACGAATGCGC
6	CCGGACTACGCGTAGTTAATGGAGCAGCGAATGTACAC
7	ATTAACTACGCGTAGTCC
8	GTTCAGAGGGGAAGTGCATACCAACCAGGATCCGCTGGATTAGATTAAGACTACGACGAAAG
9	TTGACTCCCAAGCTTTCATCGCTGGACCAAGCGACCG
10	GGACTACGCGTAGTTAATGGAGCAGCGAATGTACACAAACC
11	GATGAAAGCTTGGGAGTCAAAAGATGGTAAGTC
12	TCTGAGGAGGATCTCAATGTTTGTGAAGGTAATGAC
13	AATGAGCTTCTGTTCATTCTTCAACGTCCGGTATTC
14	AACTTGACATCCCCATTTAC
15	GGTGCAGATGTAATGAATACGTTTTAGAGCTAGAAATAGC
16	CCGACGCACTGCATTGTATG
17	CAGCAGTGCATCATCTTCGC
18	AACGAGATGTTCCGCGACTT
19	CATTCACCCACGAGGACCAA
20	AGCCGCGACAGCTACTATTC
21	CCGGACGTCAGTTGGTTGTA
22	TCCTCAACGCCCTGAAAGAC
23	GTGAGCAGCACTTGCGAAAA
24	GTACCTGCCTACCGGGTTTC
25	GTCCAGGTTTGCCGTCATTC
26	ATCGCACGTCGAGGAAACAT
27	GGTGGTGCAGATGAACTTC
28	AGGACAAGGCAATTAACCATCTTG
29	AGGACGTGAGACCGAACAGC
30	GGAGCAGCGAATGTACACAAACC
31	CGCTGGACCAAGCGACCG
32	GAAATAGAATAACGGTCGCTTGGTCCAGCGATGGGTGGTTGGGAAAGC
33	ACCACGAAAGCTATGTGCG
34	GATTATGGTGCCGCACATAGCTTTCGTGGTTACCCGTACGACGTCCCG
35	GGCGGCTGGTTTGTGTACATTCGCTGCTCCCAGCACGAAACCTTGCATTC
36	GAAATAGAATAACGGTCGCTTGGTCCAGCGATGAAAGCTTGGGAAAGCAAAG
37	TGCCTGCATTGGGTGCGG
38	TTTGTCGAAAAAGGGAATTCAAGAA
39	ATTTTTTCTTGAATTCCCTTTTTCGACAAAATGGGTGGTTGGGAAAGC
40	CAGGATCACCAACCGCACCCAATGCAGGCACAGCACGAAACCTTGCATTC
41	ATTTTTTCTTGAATTCCCTTTTTCGACAAAATGAAAGCTTGGGAAAGCAAAG
42	AATGAGCTTCTGTTCTTCCGGCTGAAAACCAGG
43	TCTGAGGAGGATCTCGGTCGTCGTATGAATAGC
44	AATGAGCTTCTGTTCATCAACACAGCTGCTATTC
45	TCTGAGGAGGATCTCATTGATGAATGTGCACGTG
46	AATGAGCTTCTGTTCATTTTTCAGGGTGCGATATTC
47	TCTGAGGAGGATCTCAACGTGTGCGAAGATATTAAC
